# Supplementary material
Source: PubMed Central journal article supplement (PMC4287649)

**B) Normal fibroblast miRNA sequencing**  
ID=MI0000077\_1;accession\_number=MI0000077;Name=hsa-mir-21  
Total reads = 20129

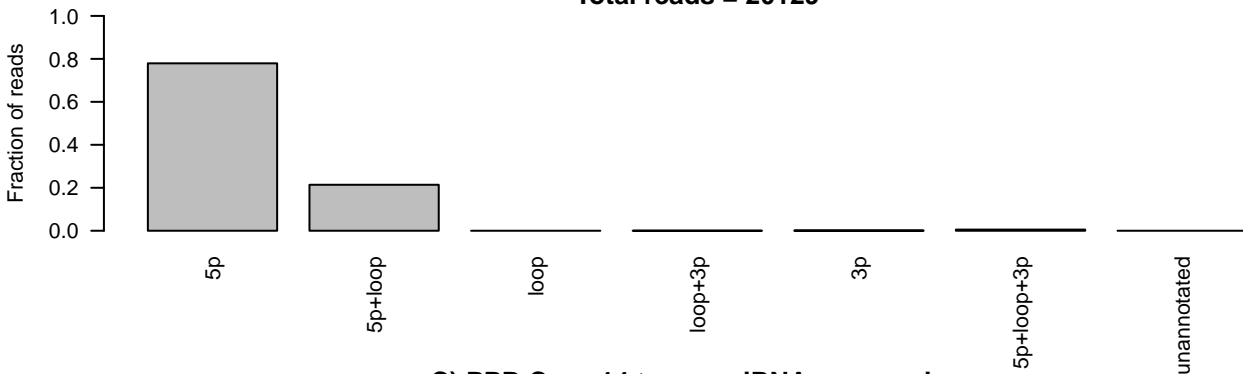

**C) PPB Case 14 tumor miRNA sequencing**  
ID=MI0000077\_1;accession\_number=MI0000077;Name=hsa-mir-21  
Total reads = 852

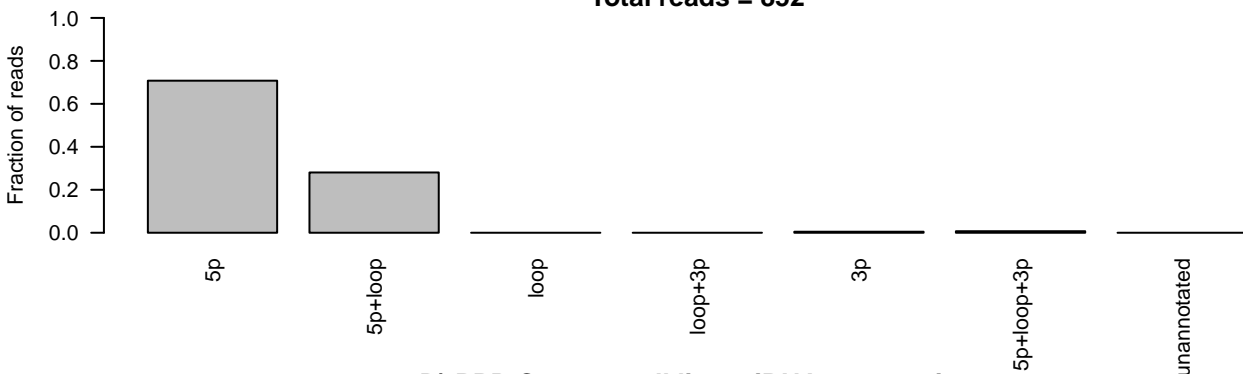

**D) PPB Case 14 cell line miRNA sequencing**  
ID=MI0000077\_1;accession\_number=MI0000077;Name=hsa-mir-21  
Total reads = 433

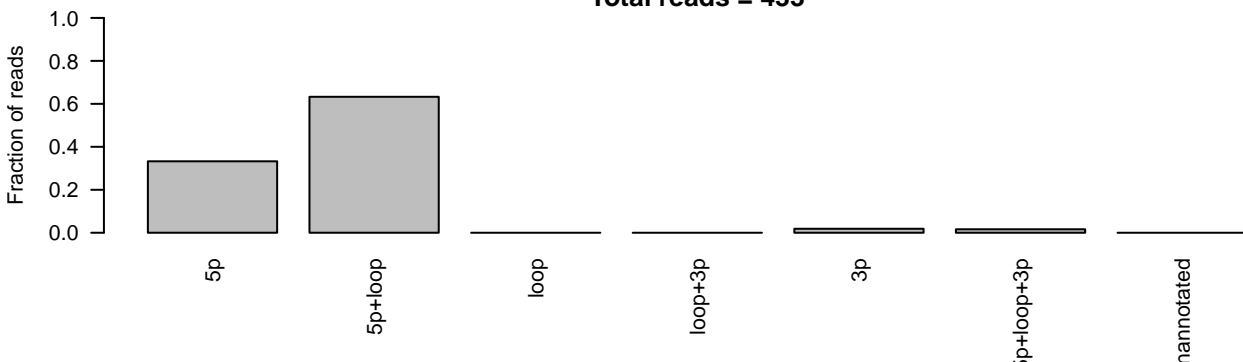

**B) Normal fibroblast miRNA sequencing**  
ID=MI0015997\_1;accession\_number=MI0015997;Name=hsa-mir-3607  
Total reads = 9362

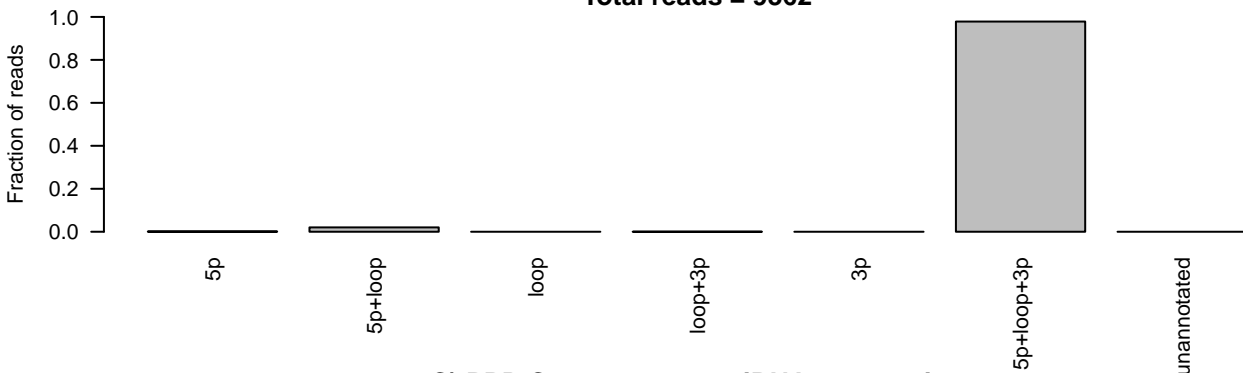

**C) PPB Case 14 tumor miRNA sequencing**  
ID=MI0015997\_1;accession\_number=MI0015997;Name=hsa-mir-3607  
Total reads = 5503

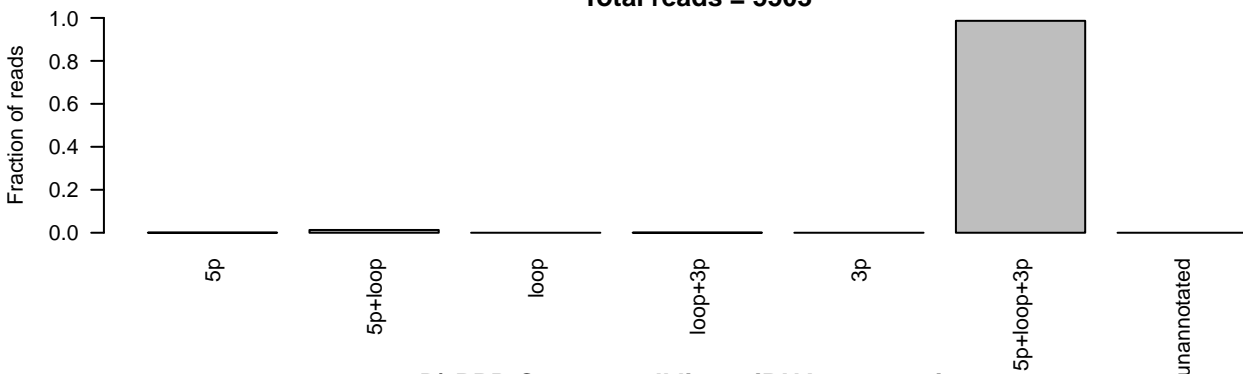

**D) PPB Case 14 cell line miRNA sequencing**  
ID=MI0015997\_1;accession\_number=MI0015997;Name=hsa-mir-3607  
Total reads = 7188

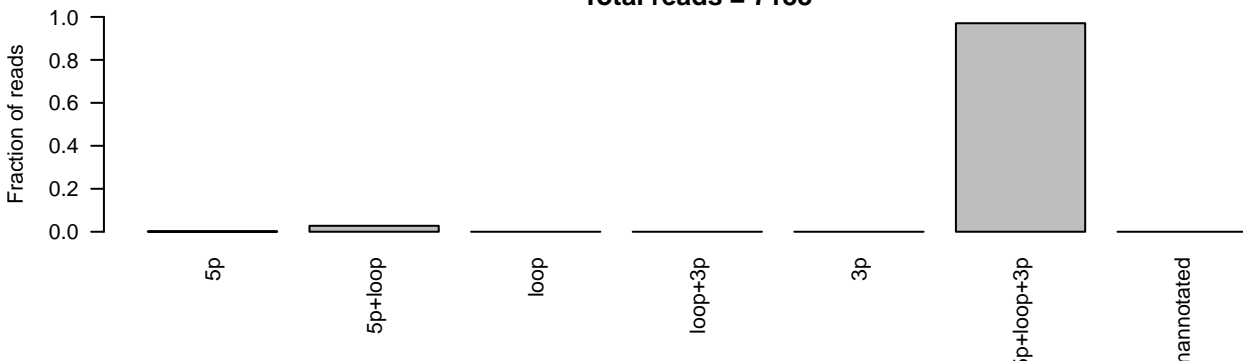

**B) Normal fibroblast miRNA sequencing**  
ID=MI0000461\_1;accession\_number=MI0000461;Name=hsa-mir-145  
Total reads = 7868

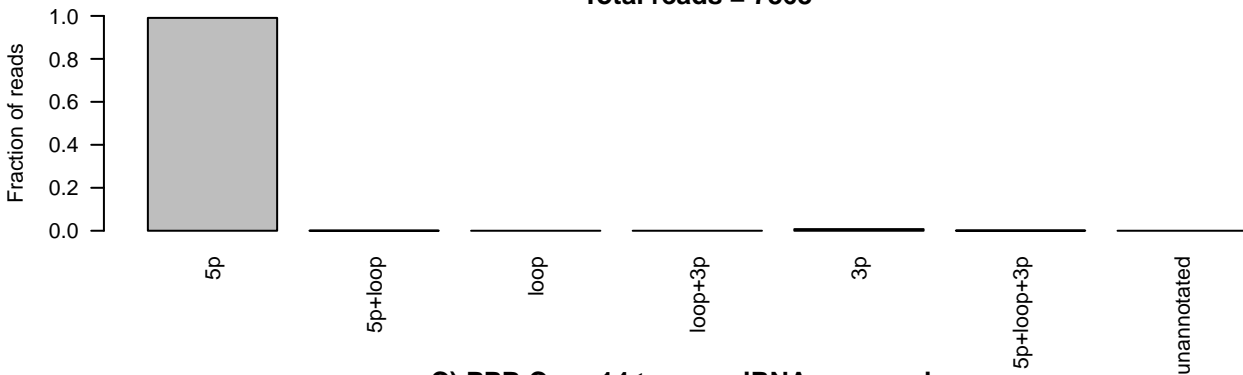

**C) PPB Case 14 tumor miRNA sequencing**  
ID=MI0000461\_1;accession\_number=MI0000461;Name=hsa-mir-145  
Total reads = 1292

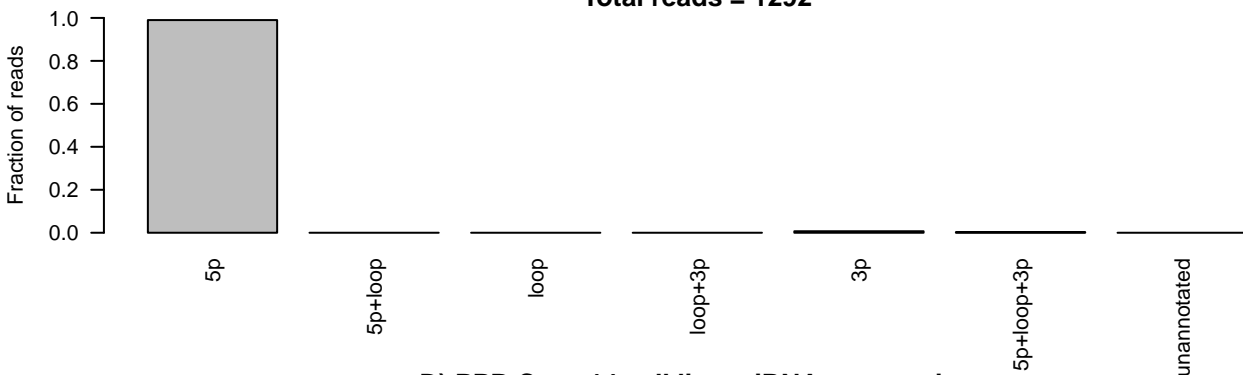

**D) PPB Case 14 cell line miRNA sequencing**  
ID=MI0000461\_1;accession\_number=MI0000461;Name=hsa-mir-145  
Total reads = 5

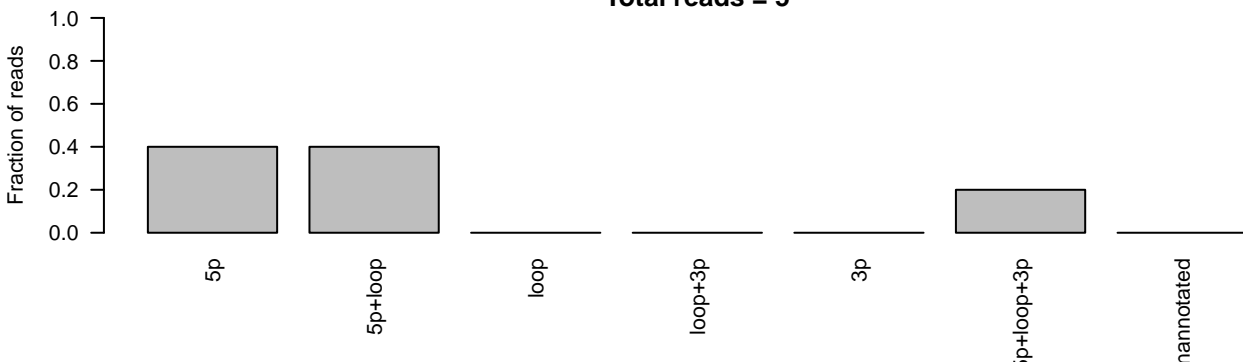

**B) Normal fibroblast miRNA sequencing**  
ID=MI0000083\_1;accession\_number=MI0000083;Name=hsa-mir-26a-1  
Total reads = 5015

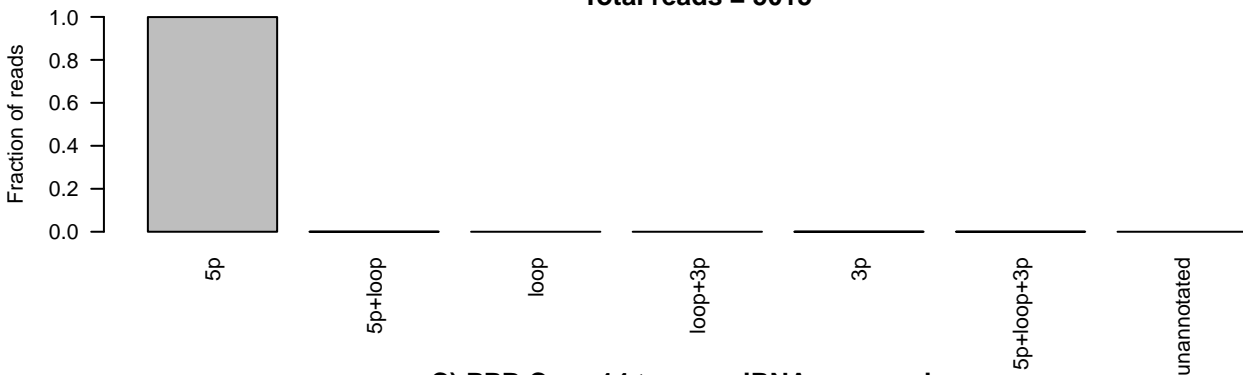

**C) PPB Case 14 tumor miRNA sequencing**  
ID=MI0000083\_1;accession\_number=MI0000083;Name=hsa-mir-26a-1  
Total reads = 587

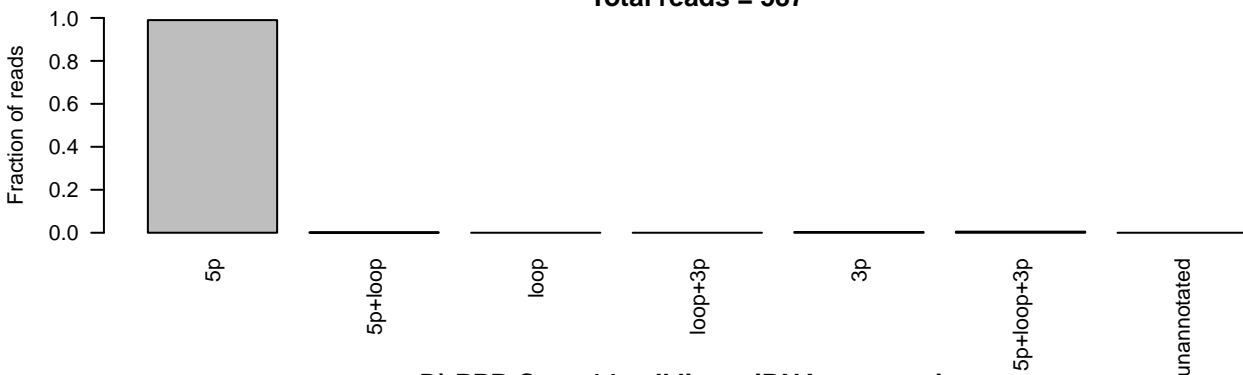

**D) PPB Case 14 cell line miRNA sequencing**  
ID=MI0000083\_1;accession\_number=MI0000083;Name=hsa-mir-26a-1  
Total reads = 1

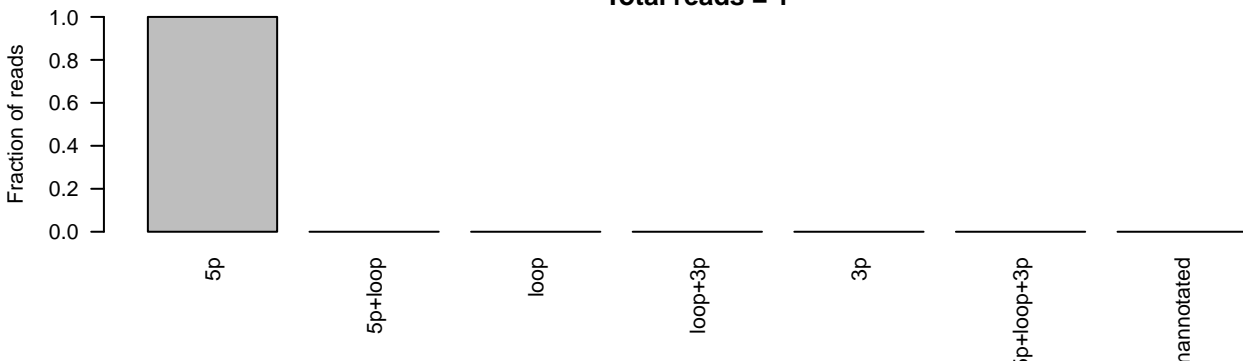

**B) Normal fibroblast miRNA sequencing**  
ID=MI0000062\_1;accession\_number=MI0000062;Name=hsa-let-7a-3  
Total reads = 3186

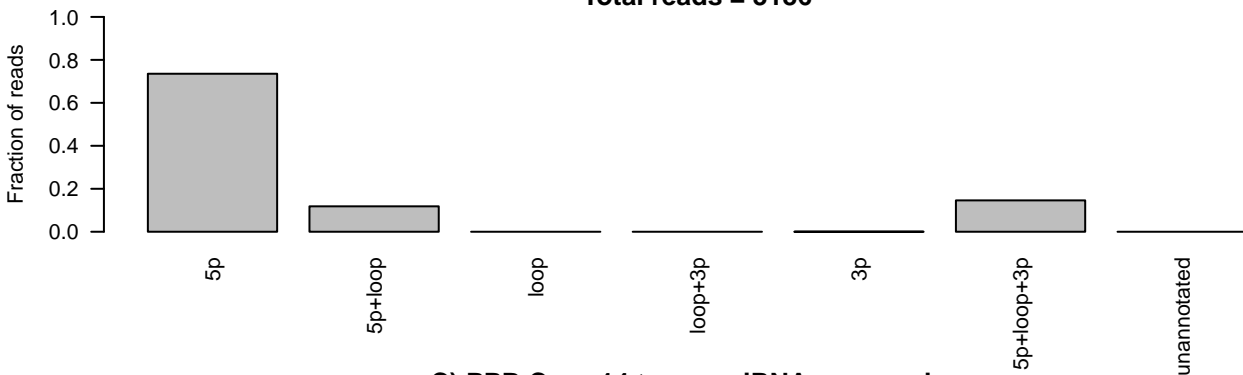

**C) PPB Case 14 tumor miRNA sequencing**  
ID=MI0000062\_1;accession\_number=MI0000062;Name=hsa-let-7a-3  
Total reads = 579

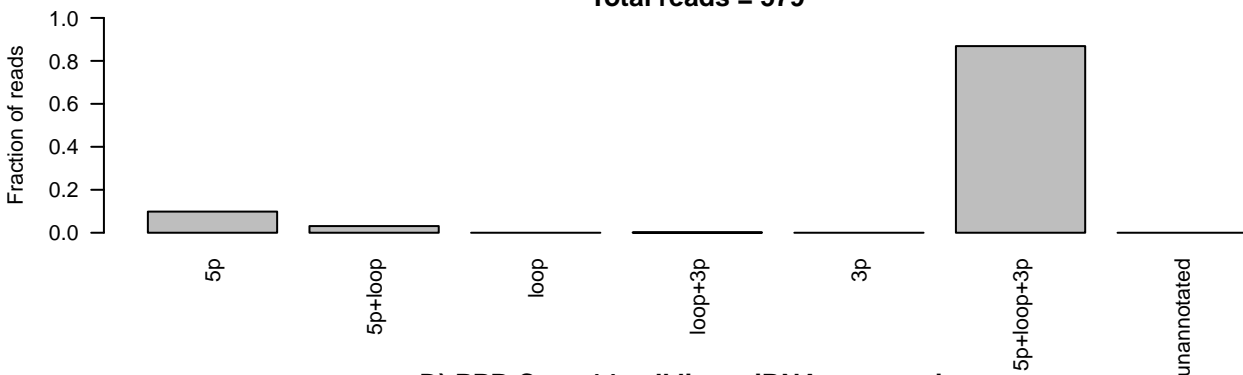

**D) PPB Case 14 cell line miRNA sequencing**  
ID=MI0000062\_1;accession\_number=MI0000062;Name=hsa-let-7a-3  
Total reads = 64

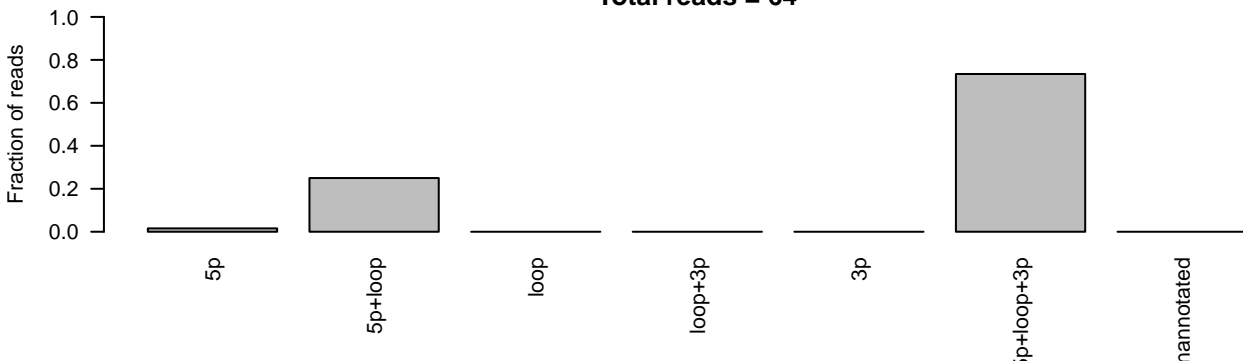

**B) Normal fibroblast miRNA sequencing**  
ID=MI0000085\_1;accession\_number=MI0000085;Name=hsa-mir-27a  
Total reads = 2449

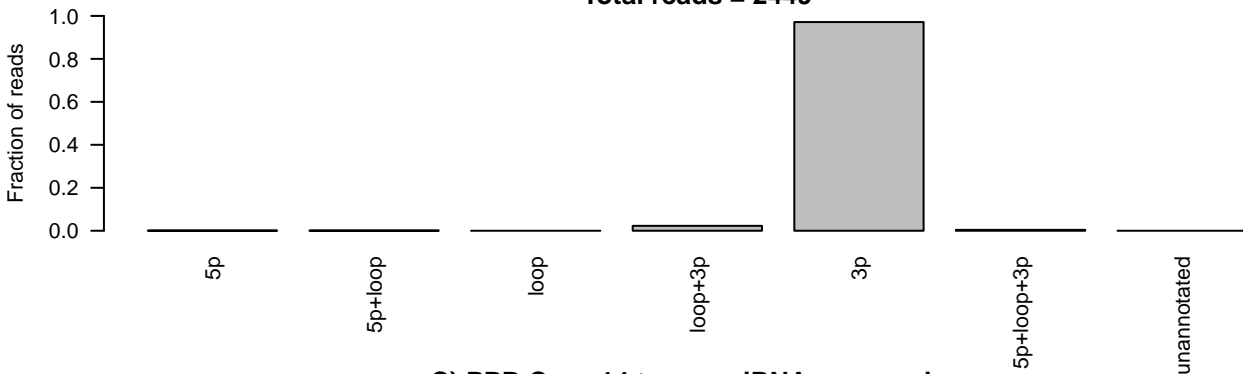

**C) PPB Case 14 tumor miRNA sequencing**  
ID=MI0000085\_1;accession\_number=MI0000085;Name=hsa-mir-27a  
Total reads = 527

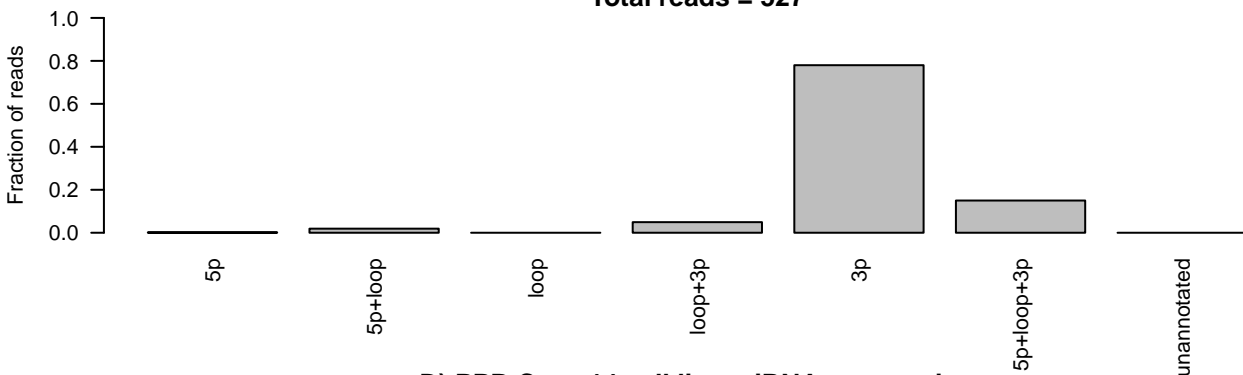

**D) PPB Case 14 cell line miRNA sequencing**  
ID=MI0000085\_1;accession\_number=MI0000085;Name=hsa-mir-27a  
Total reads = 79

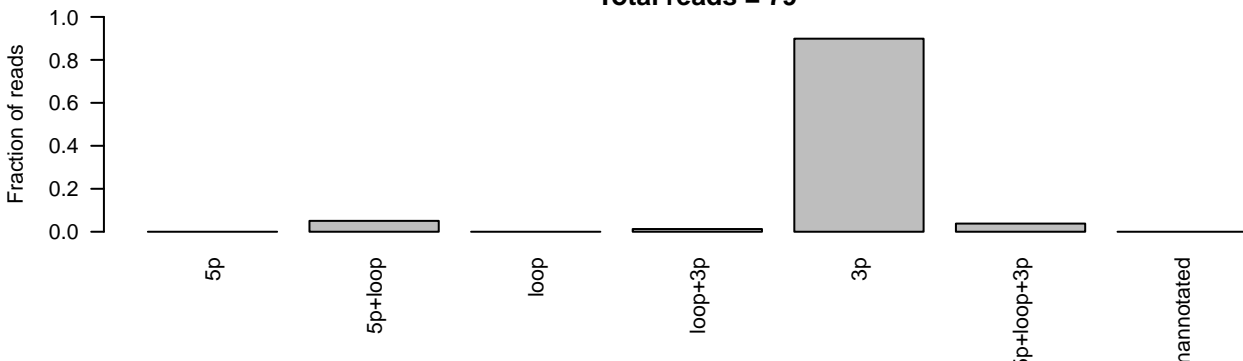

**B) Normal fibroblast miRNA sequencing**  
ID=MI0000089\_1;accession\_number=MI0000089;Name=hsa-mir-31  
Total reads = 2088

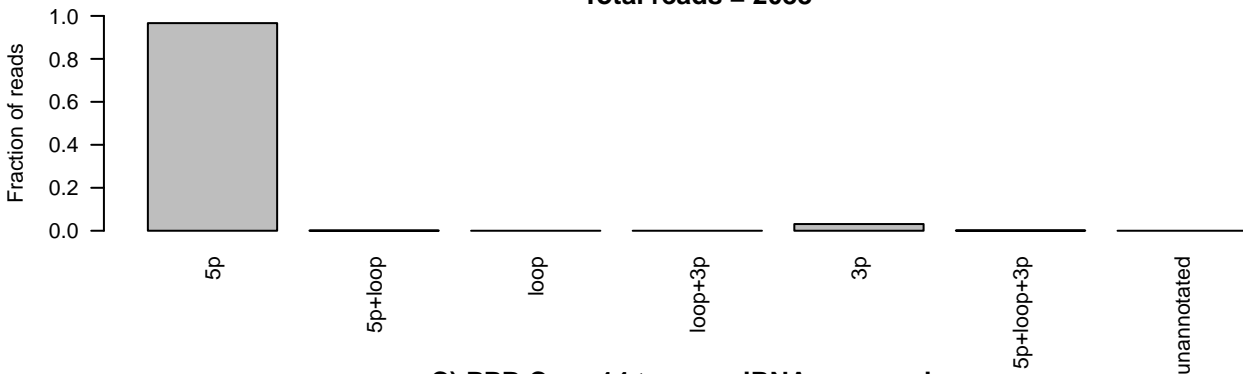

**C) PPB Case 14 tumor miRNA sequencing**  
ID=MI0000089\_1;accession\_number=MI0000089;Name=hsa-mir-31  
Total reads = 0

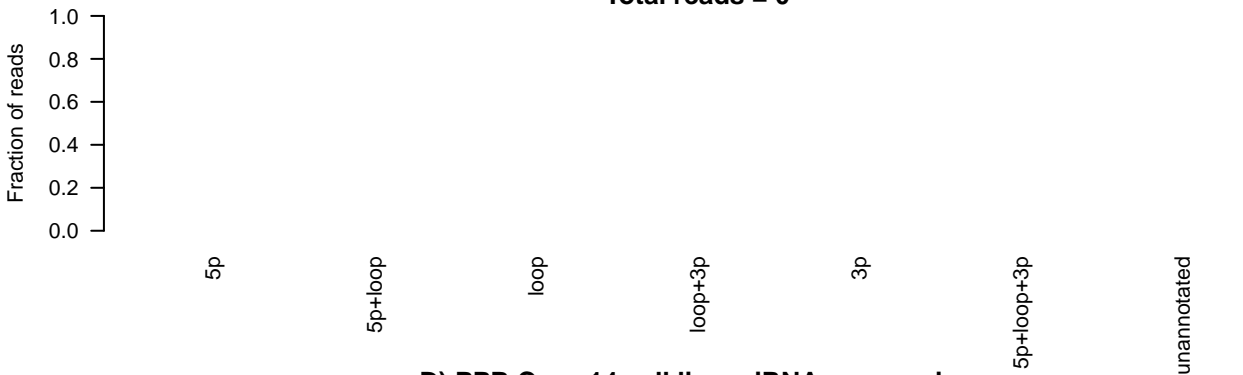

**D) PPB Case 14 cell line miRNA sequencing**  
ID=MI0000089\_1;accession\_number=MI0000089;Name=hsa-mir-31  
Total reads = 67

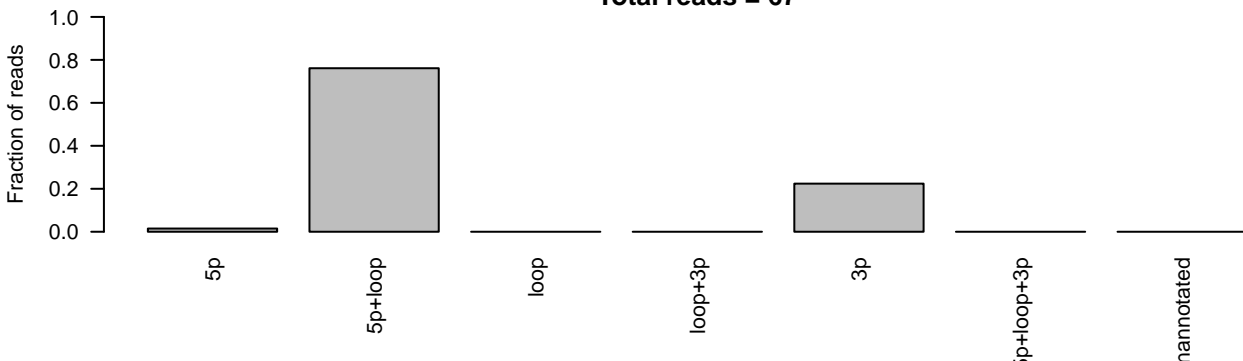

**B) Normal fibroblast miRNA sequencing**  
ID=MI0000298\_1;accession\_number=MI0000298;Name=hsa-mir-221  
Total reads = 1986

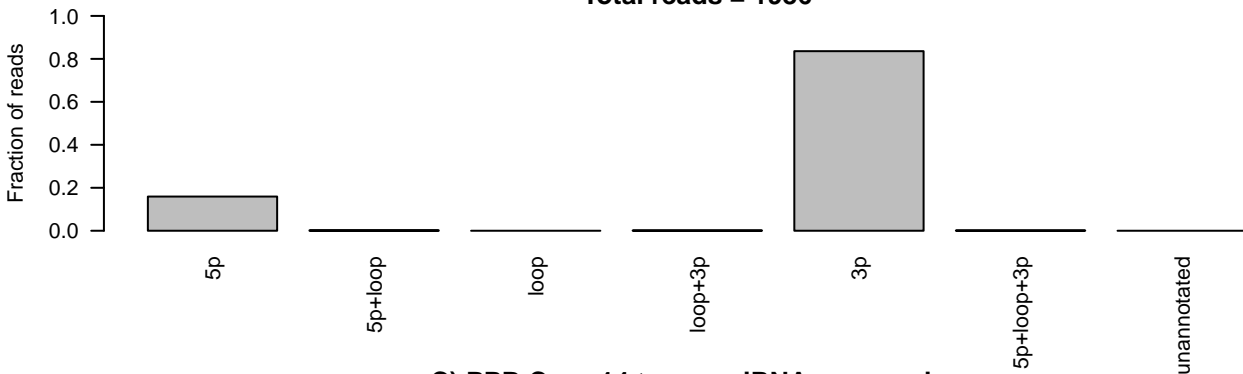

**C) PPB Case 14 tumor miRNA sequencing**  
ID=MI0000298\_1;accession\_number=MI0000298;Name=hsa-mir-221  
Total reads = 6

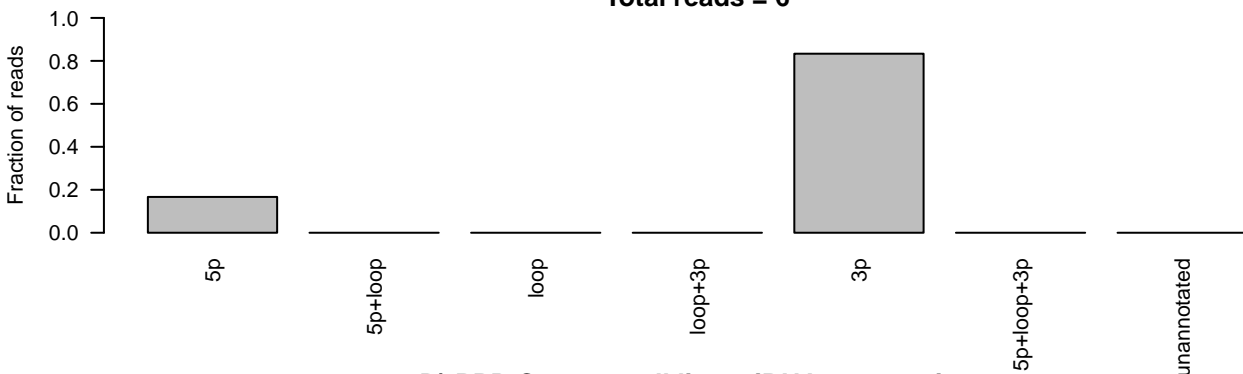

**D) PPB Case 14 cell line miRNA sequencing**  
ID=MI0000298\_1;accession\_number=MI0000298;Name=hsa-mir-221  
Total reads = 164

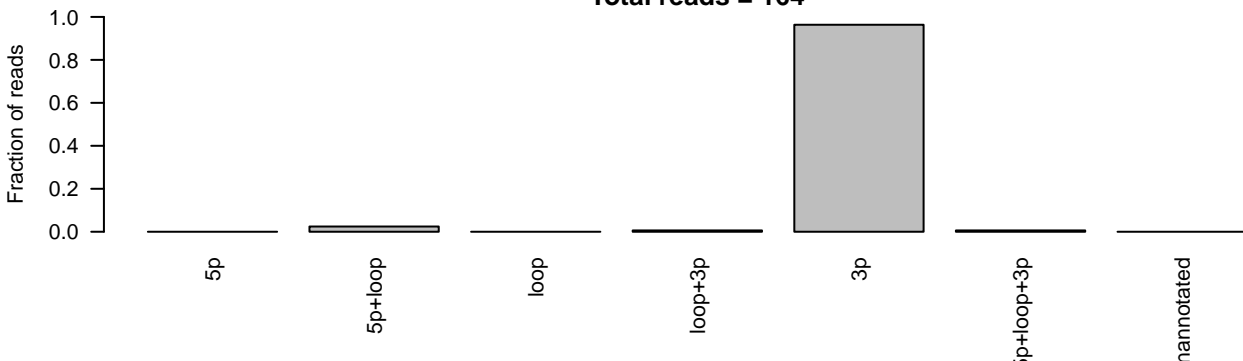



**B) Normal fibroblast miRNA sequencing**  
ID=MI0000269\_1;accession\_number=MI0000269;Name=hsa-mir-181a-2  
Total reads = 1806

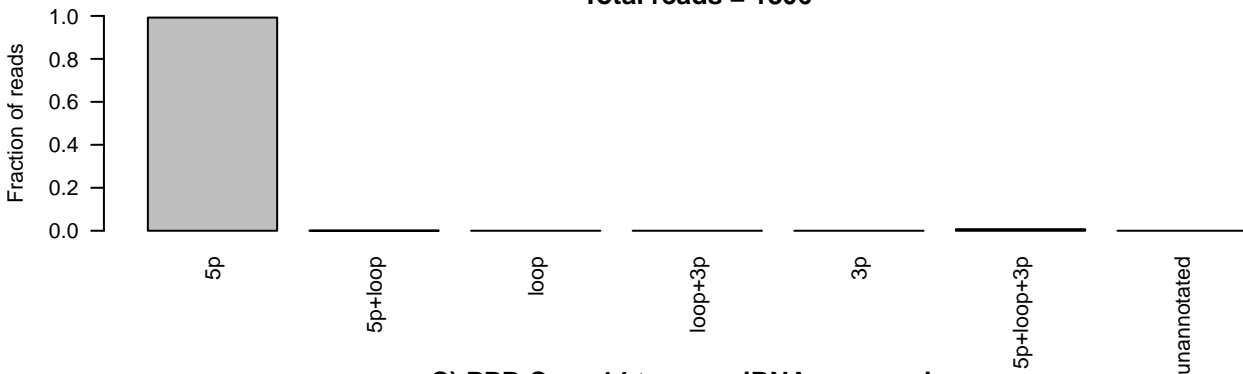

**C) PPB Case 14 tumor miRNA sequencing**  
ID=MI0000269\_1;accession\_number=MI0000269;Name=hsa-mir-181a-2  
Total reads = 272

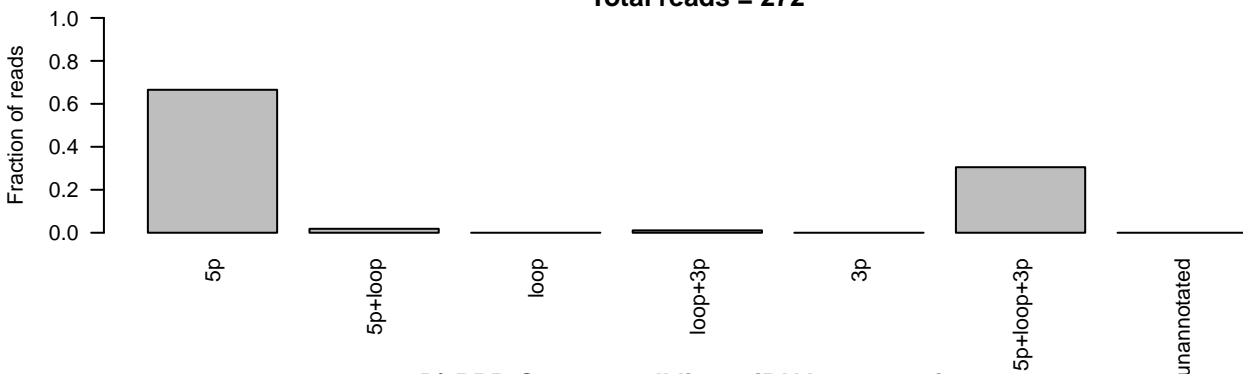

**D) PPB Case 14 cell line miRNA sequencing**  
ID=MI0000269\_1;accession\_number=MI0000269;Name=hsa-mir-181a-2  
Total reads = 20

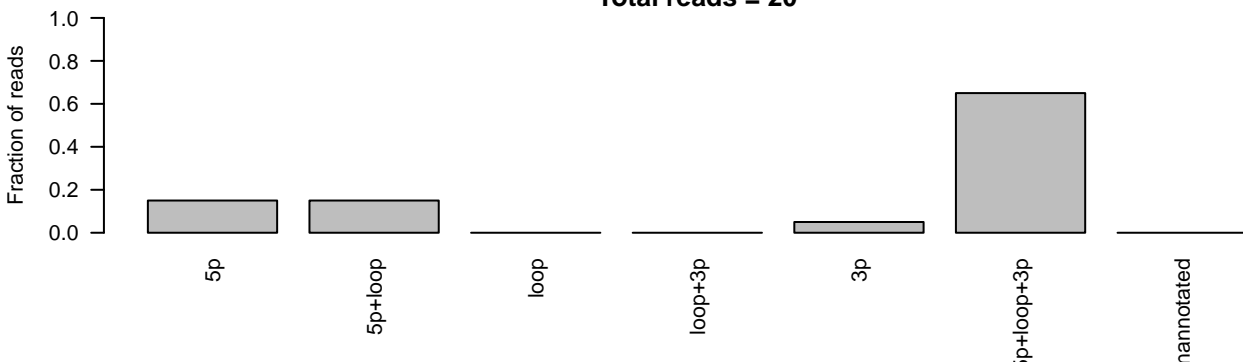

**B) Normal fibroblast miRNA sequencing**  
ID=MI0003129\_1;accession\_number=MI0003129;Name=hsa-mir-146b  
Total reads = 27

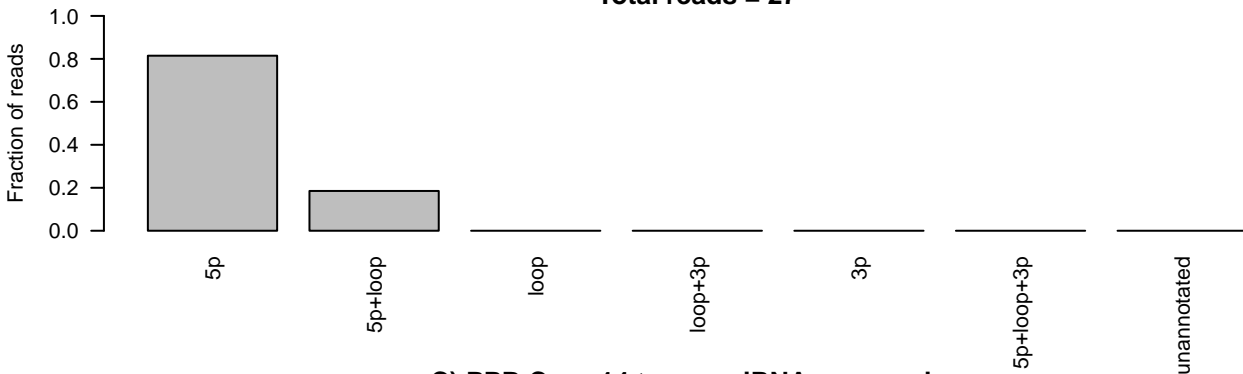

**C) PPB Case 14 tumor miRNA sequencing**  
ID=MI0003129\_1;accession\_number=MI0003129;Name=hsa-mir-146b  
Total reads = 2

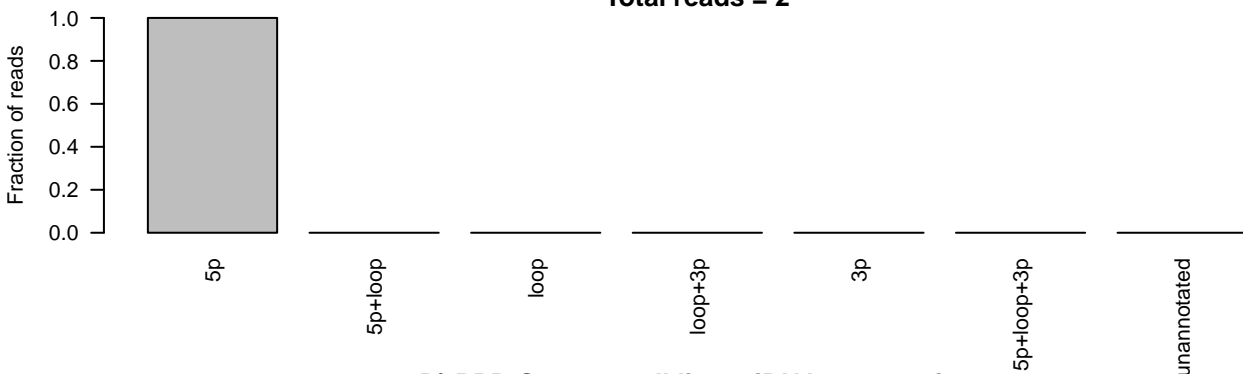

**D) PPB Case 14 cell line miRNA sequencing**  
ID=MI0003129\_1;accession\_number=MI0003129;Name=hsa-mir-146b  
Total reads = 0

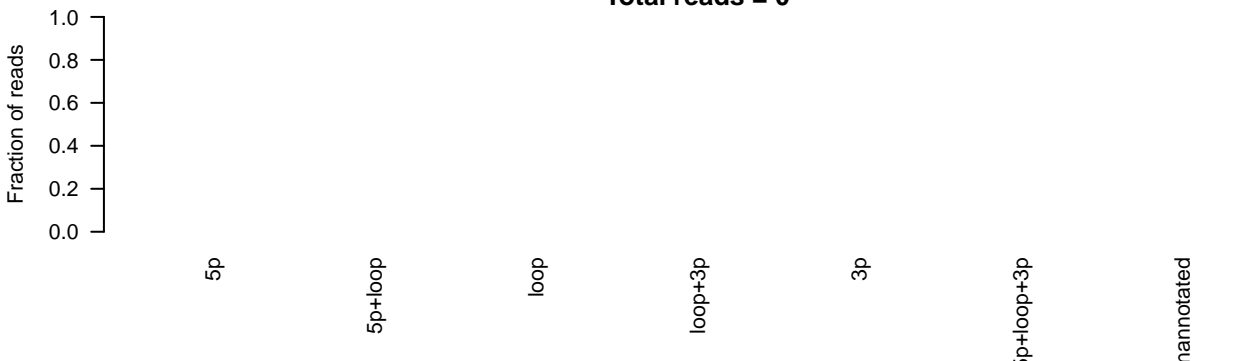

**B) Normal fibroblast miRNA sequencing**  
ID=MI0000063\_1;accession\_number=MI0000063;Name=hsa-let-7b  
Total reads = 1172

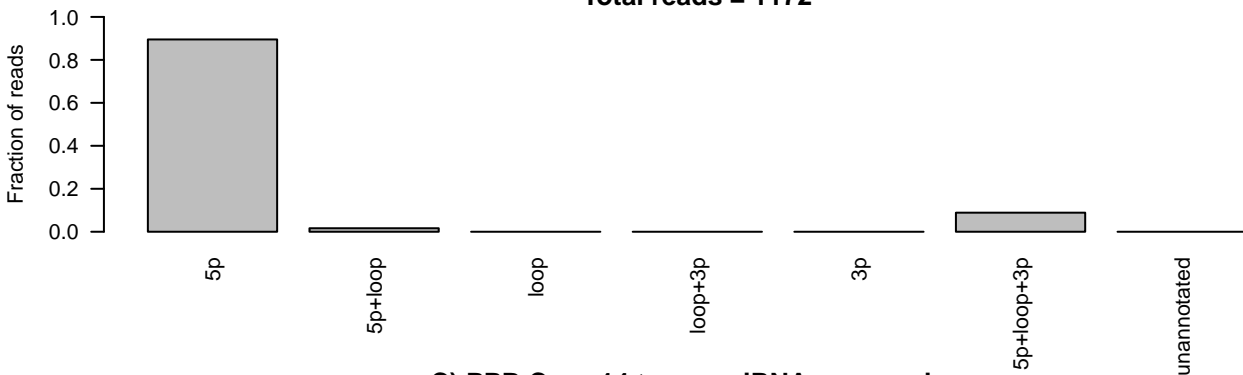

**C) PPB Case 14 tumor miRNA sequencing**  
ID=MI0000063\_1;accession\_number=MI0000063;Name=hsa-let-7b  
Total reads = 142

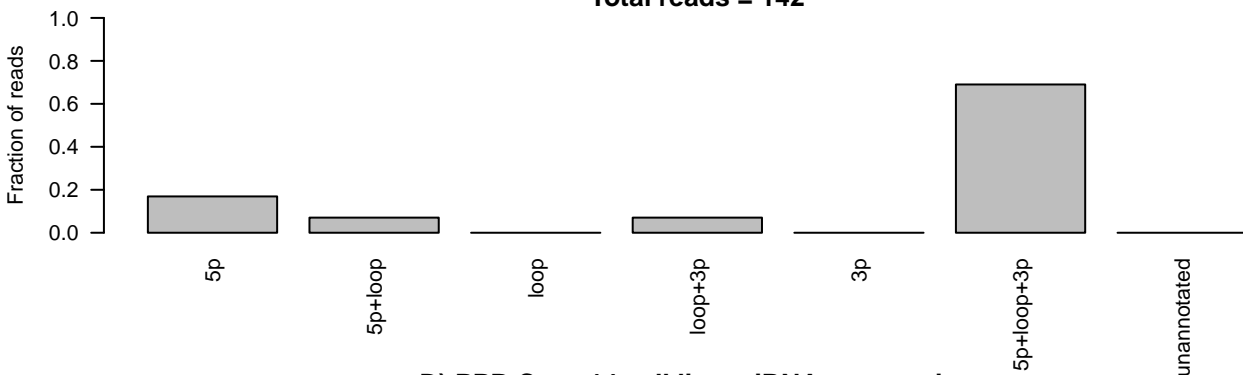

**D) PPB Case 14 cell line miRNA sequencing**  
ID=MI0000063\_1;accession\_number=MI0000063;Name=hsa-let-7b  
Total reads = 11

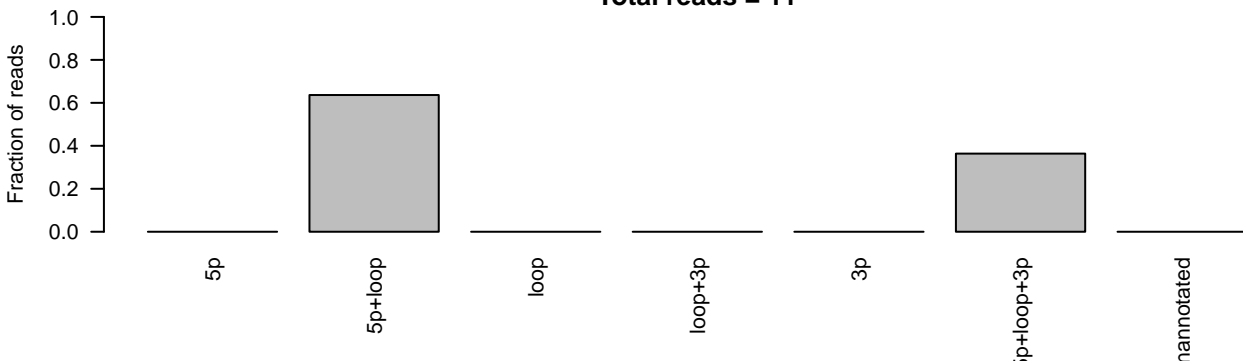

**B) Normal fibroblast miRNA sequencing**  
ID=MI0000465\_1;accession\_number=MI0000465;Name=hsa-mir-191  
Total reads = 1308

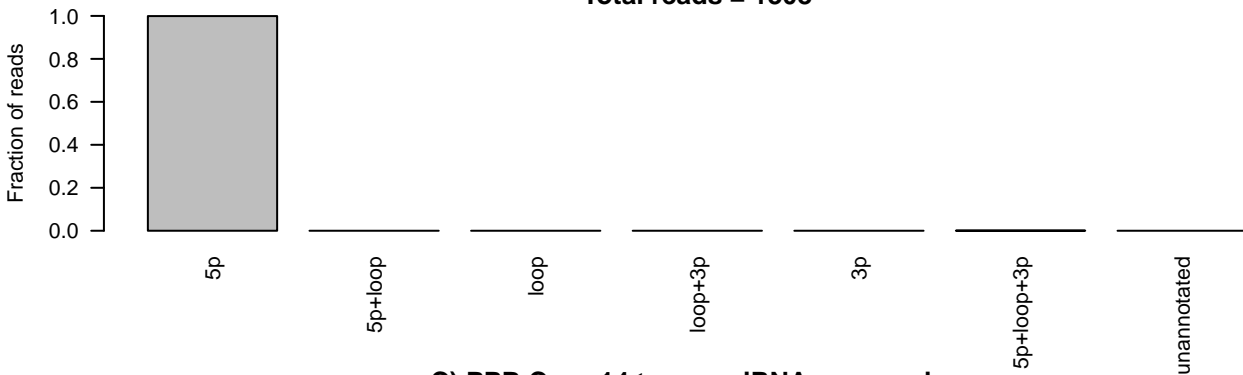

**C) PPB Case 14 tumor miRNA sequencing**  
ID=MI0000465\_1;accession\_number=MI0000465;Name=hsa-mir-191  
Total reads = 19

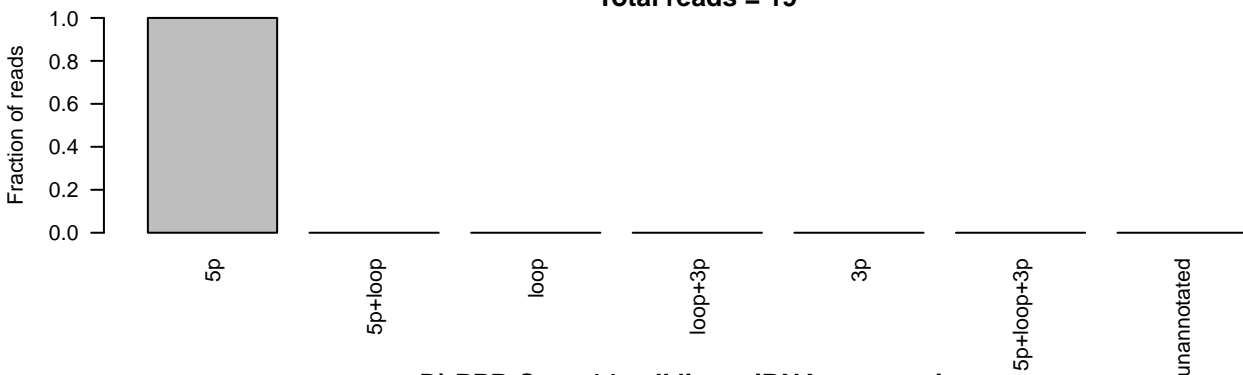

**D) PPB Case 14 cell line miRNA sequencing**  
ID=MI0000465\_1;accession\_number=MI0000465;Name=hsa-mir-191  
Total reads = 0

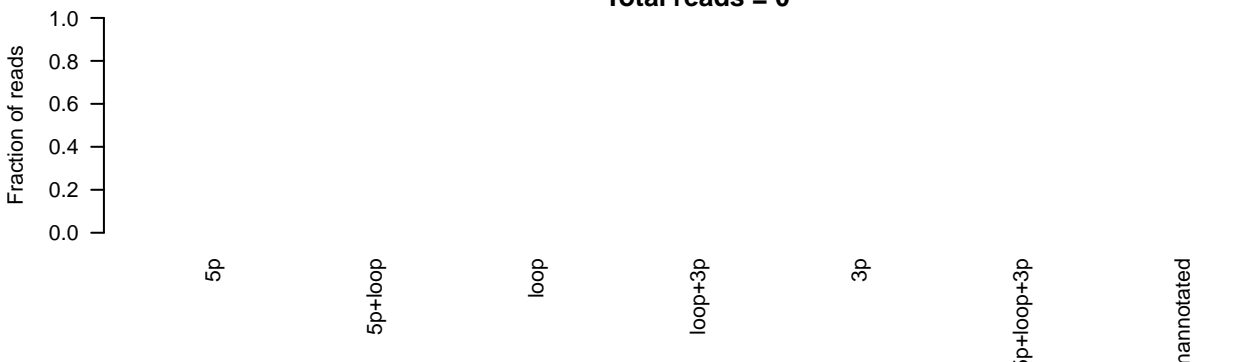

**B) Normal fibroblast miRNA sequencing**  
ID=MI0016887\_1;accession\_number=MI0016887;Name=hsa-mir-4521  
Total reads = 462

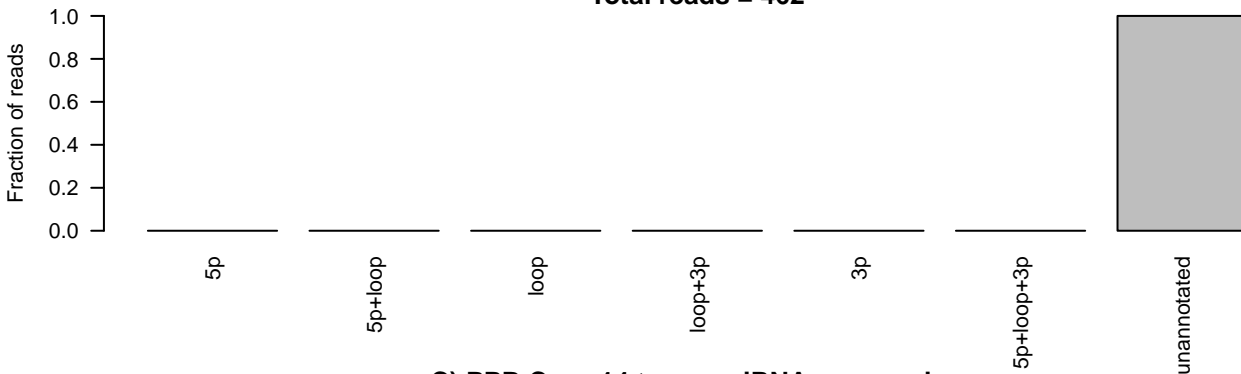

**C) PPB Case 14 tumor miRNA sequencing**  
ID=MI0016887\_1;accession\_number=MI0016887;Name=hsa-mir-4521  
Total reads = 17

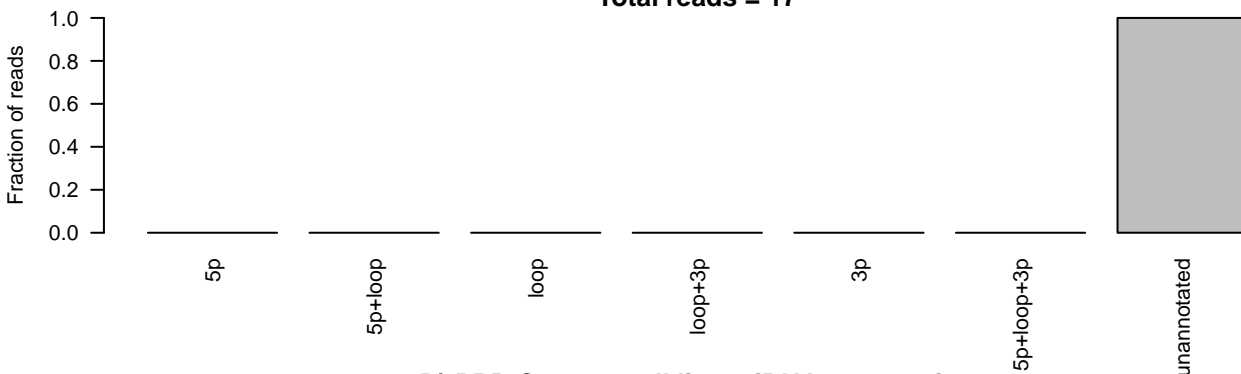

**D) PPB Case 14 cell line miRNA sequencing**  
ID=MI0016887\_1;accession\_number=MI0016887;Name=hsa-mir-4521  
Total reads = 36

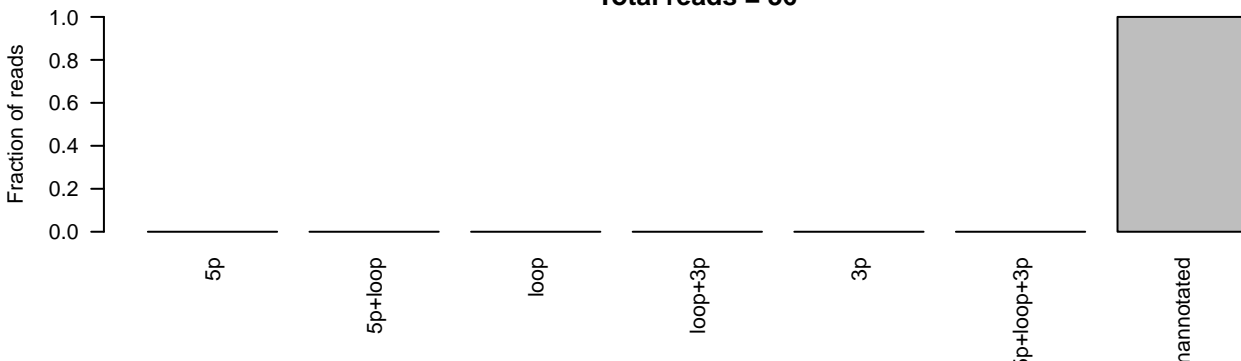

**B) Normal fibroblast miRNA sequencing**  
ID=MI0001448\_1;accession\_number=MI0001448;Name=hsa-mir-425  
Total reads = 1092

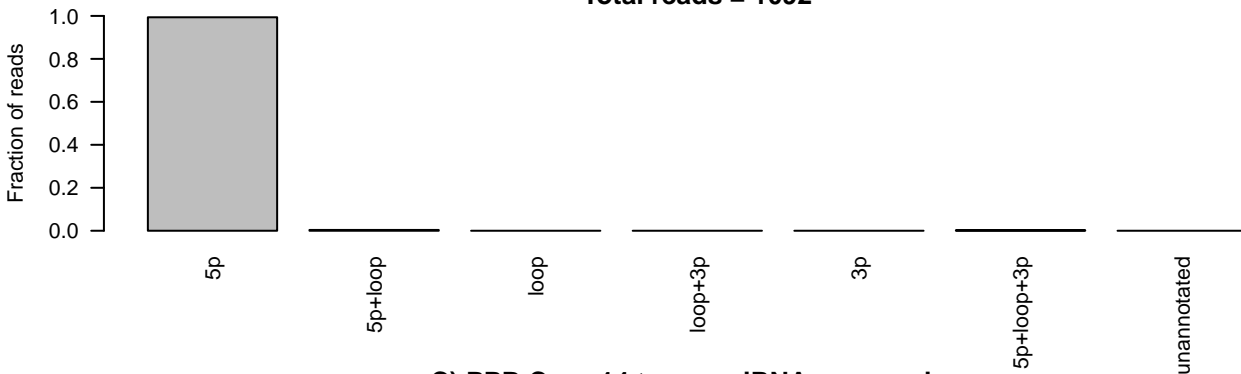

**C) PPB Case 14 tumor miRNA sequencing**  
ID=MI0001448\_1;accession\_number=MI0001448;Name=hsa-mir-425  
Total reads = 30

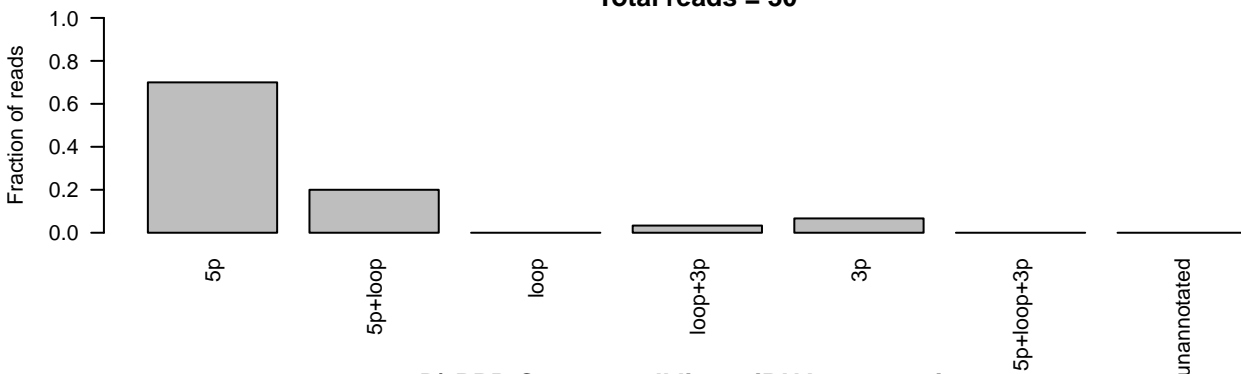

**D) PPB Case 14 cell line miRNA sequencing**  
ID=MI0001448\_1;accession\_number=MI0001448;Name=hsa-mir-425  
Total reads = 3

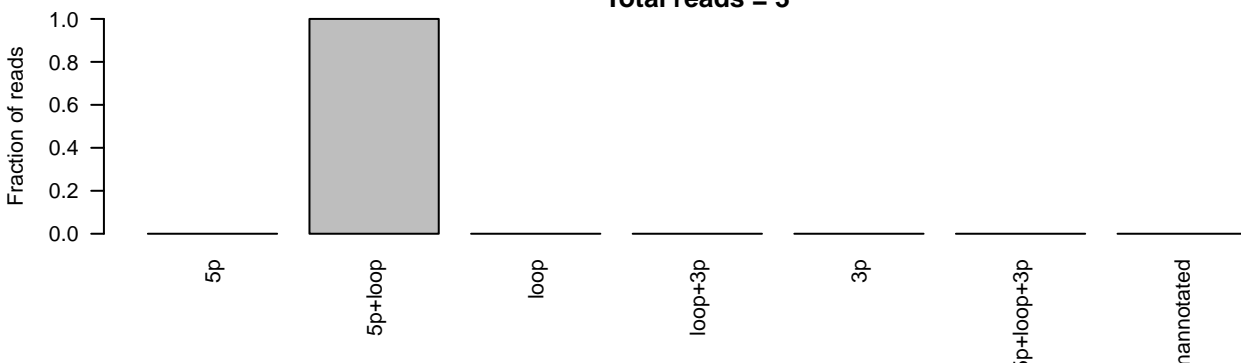

**B) Normal fibroblast miRNA sequencing**  
ID=MI0003760\_1;accession\_number=MI0003760;Name=hsa-mir-671  
Total reads = 36

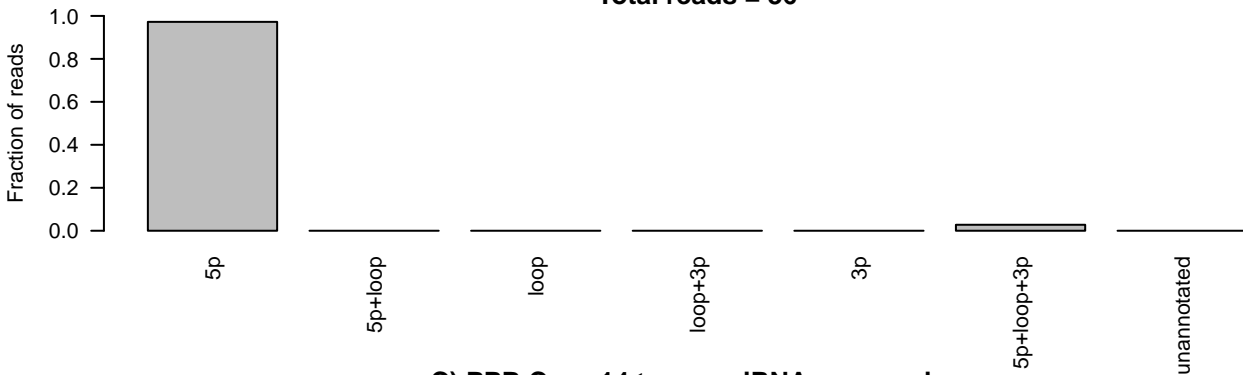

**C) PPB Case 14 tumor miRNA sequencing**  
ID=MI0003760\_1;accession\_number=MI0003760;Name=hsa-mir-671  
Total reads = 2

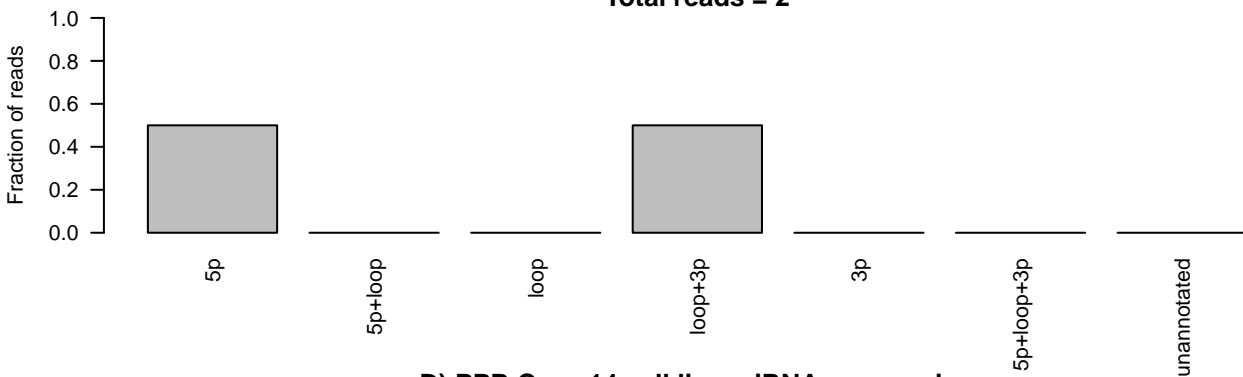

**D) PPB Case 14 cell line miRNA sequencing**  
ID=MI0003760\_1;accession\_number=MI0003760;Name=hsa-mir-671  
Total reads = 0



**B) Normal fibroblast miRNA sequencing**  
ID=MI0000470\_1;accession\_number=MI0000470;Name=hsa-mir-125b-2  
Total reads = 757

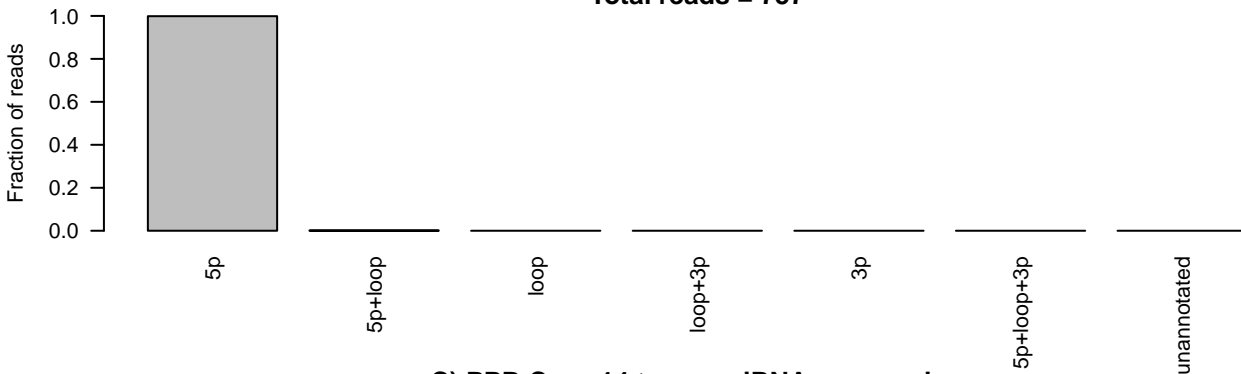

**C) PPB Case 14 tumor miRNA sequencing**  
ID=MI0000470\_1;accession\_number=MI0000470;Name=hsa-mir-125b-2  
Total reads = 9

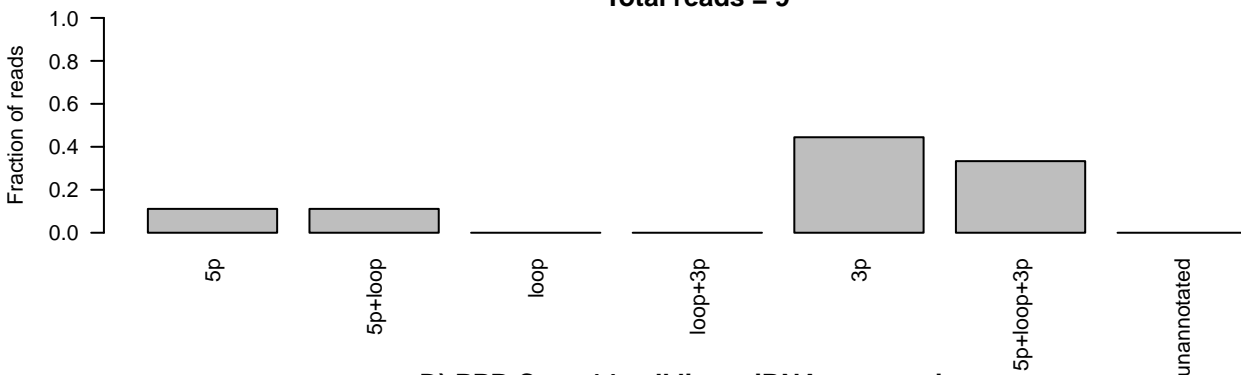

**D) PPB Case 14 cell line miRNA sequencing**  
ID=MI0000470\_1;accession\_number=MI0000470;Name=hsa-mir-125b-2  
Total reads = 7

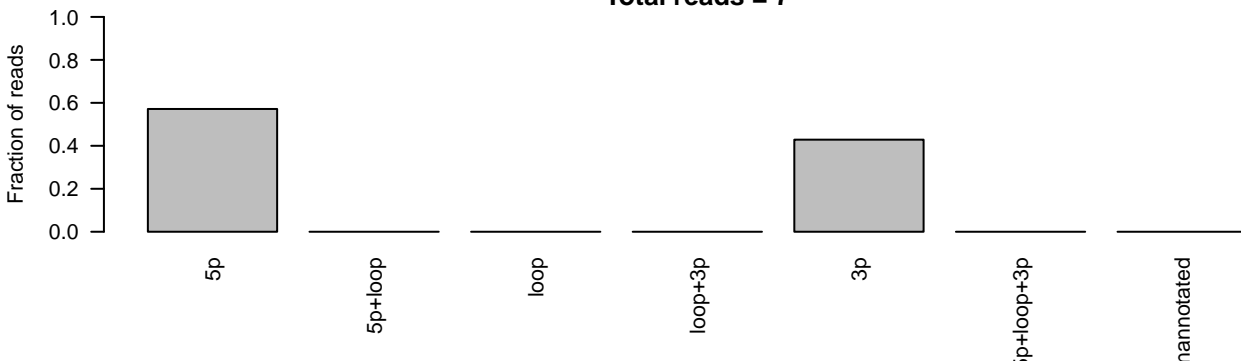



**B) Normal fibroblast miRNA sequencing**  
ID=MI0000270\_1;accession\_number=MI0000270;Name=hsa-mir-181b-1  
Total reads = 659

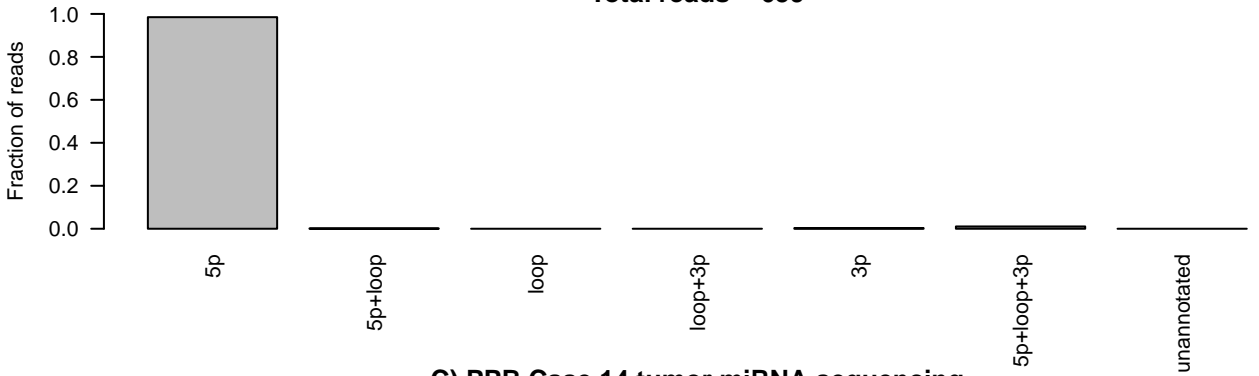

**C) PPB Case 14 tumor miRNA sequencing**  
ID=MI0000270\_1;accession\_number=MI0000270;Name=hsa-mir-181b-1  
Total reads = 44

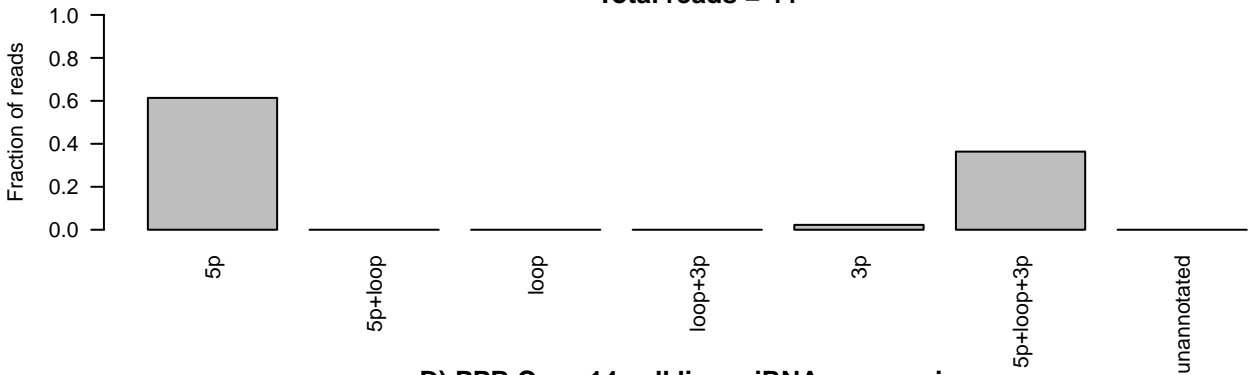

**D) PPB Case 14 cell line miRNA sequencing**  
ID=MI0000270\_1;accession\_number=MI0000270;Name=hsa-mir-181b-1  
Total reads = 17

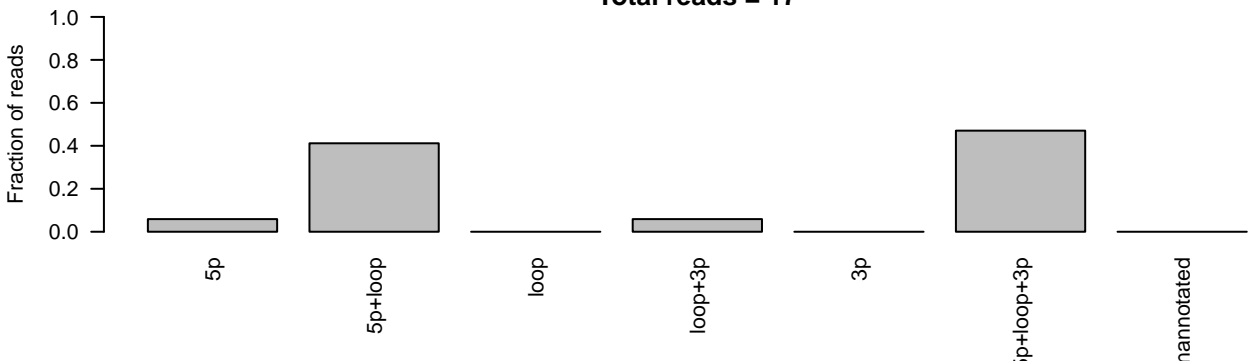

**B) Normal fibroblast miRNA sequencing**  
ID=MI0000263\_1;accession\_number=MI0000263;Name=hsa-mir-7-1  
Total reads = 0

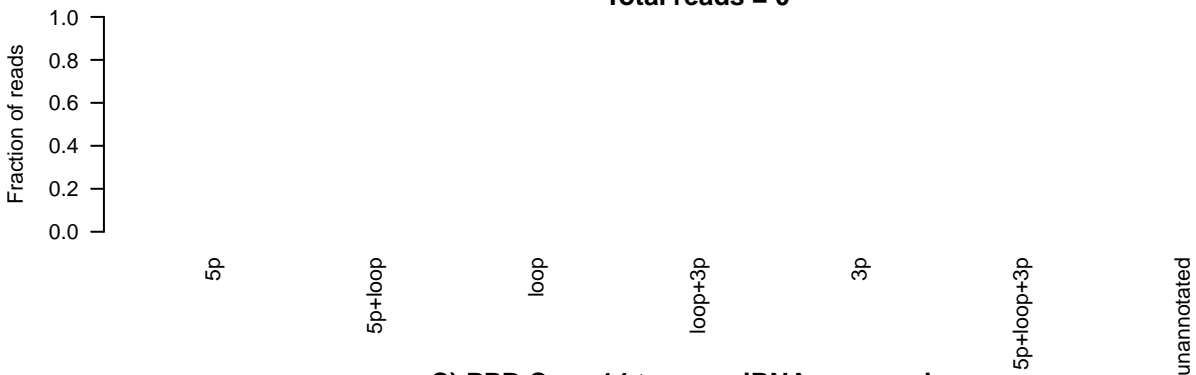

**C) PPB Case 14 tumor miRNA sequencing**  
ID=MI0000263\_1;accession\_number=MI0000263;Name=hsa-mir-7-1  
Total reads = 1

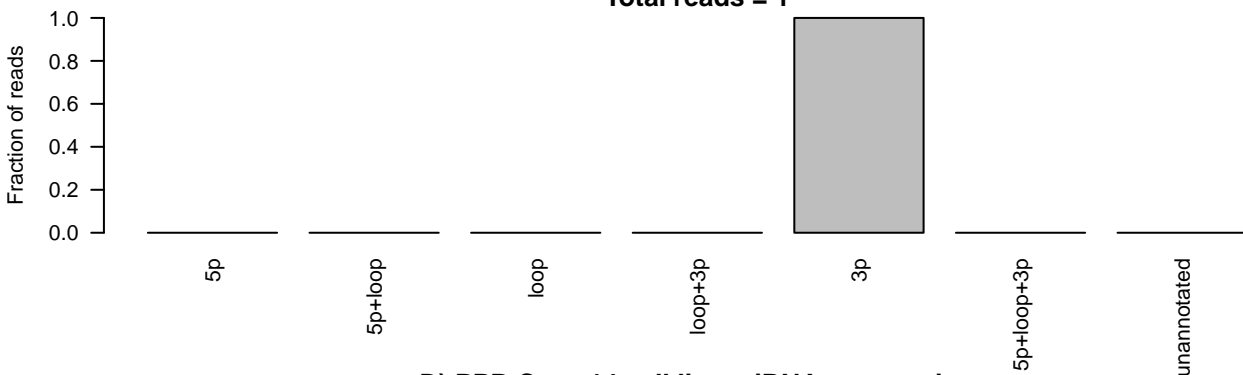

**D) PPB Case 14 cell line miRNA sequencing**  
ID=MI0000263\_1;accession\_number=MI0000263;Name=hsa-mir-7-1  
Total reads = 0

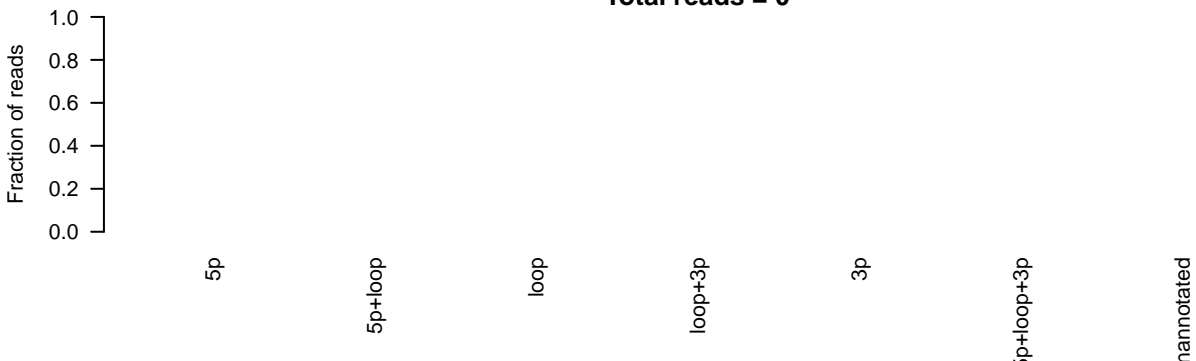

**B) Normal fibroblast miRNA sequencing**  
ID=MI0000061\_1;accession\_number=MI0000061;Name=hsa-let-7a-2  
Total reads = 547

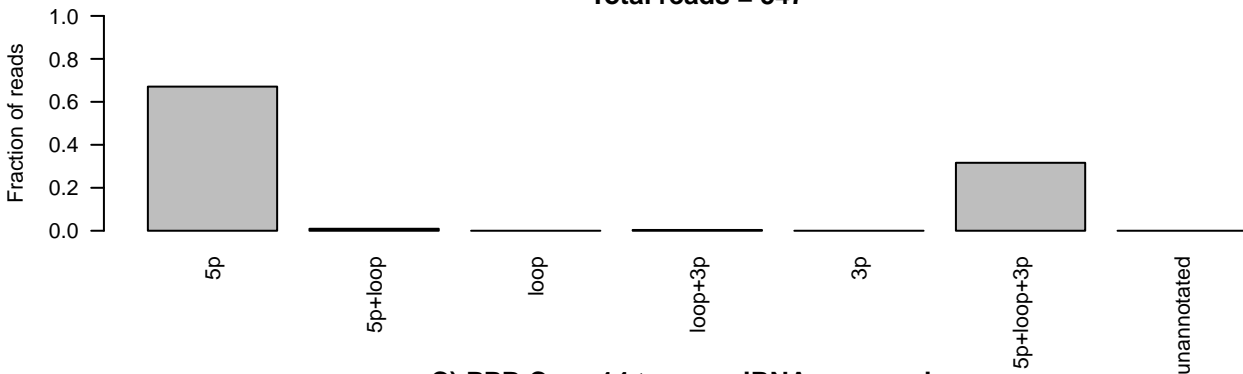

**C) PPB Case 14 tumor miRNA sequencing**  
ID=MI0000061\_1;accession\_number=MI0000061;Name=hsa-let-7a-2  
Total reads = 79

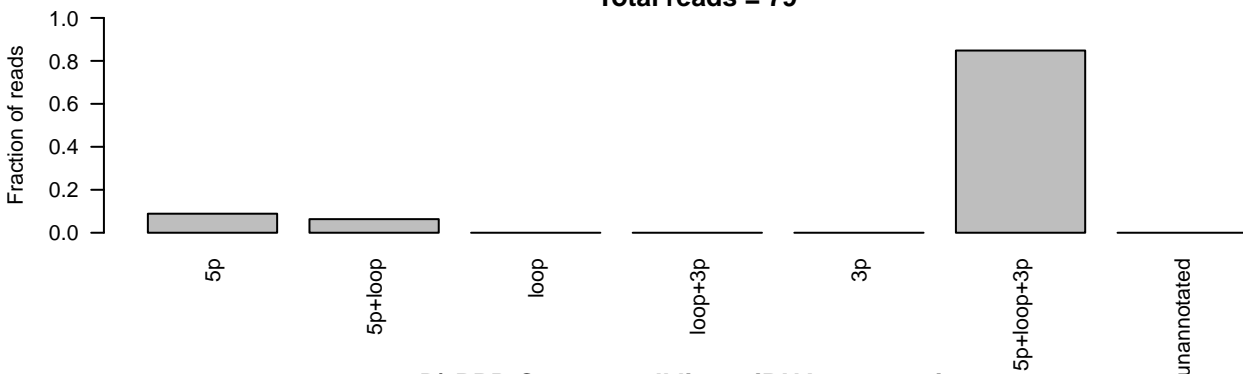

**D) PPB Case 14 cell line miRNA sequencing**  
ID=MI0000061\_1;accession\_number=MI0000061;Name=hsa-let-7a-2  
Total reads = 26

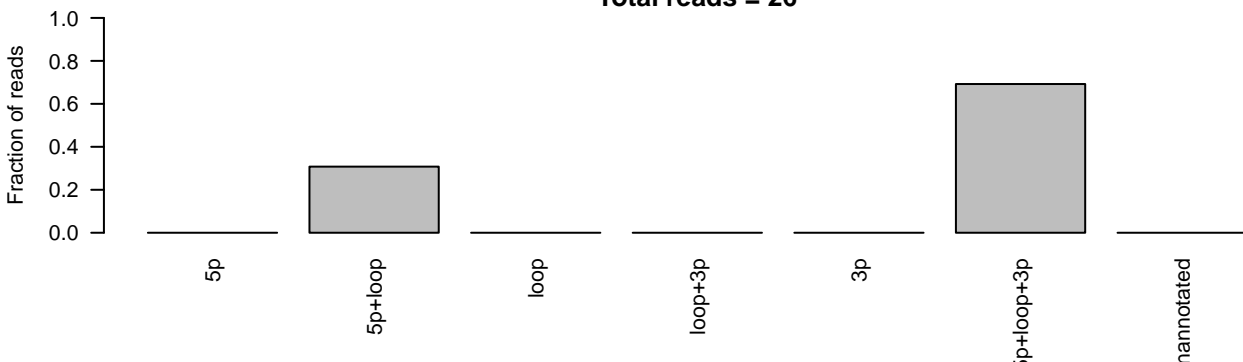

**B) Normal fibroblast miRNA sequencing**  
ID=MI0002468\_1;accession\_number=MI0002468;Name=hsa-mir-484  
Total reads = 465

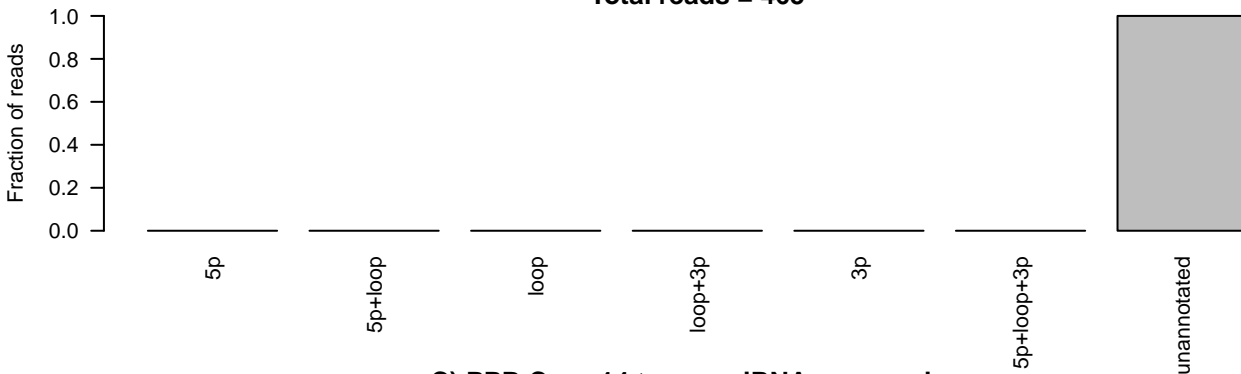

**C) PPB Case 14 tumor miRNA sequencing**  
ID=MI0002468\_1;accession\_number=MI0002468;Name=hsa-mir-484  
Total reads = 251

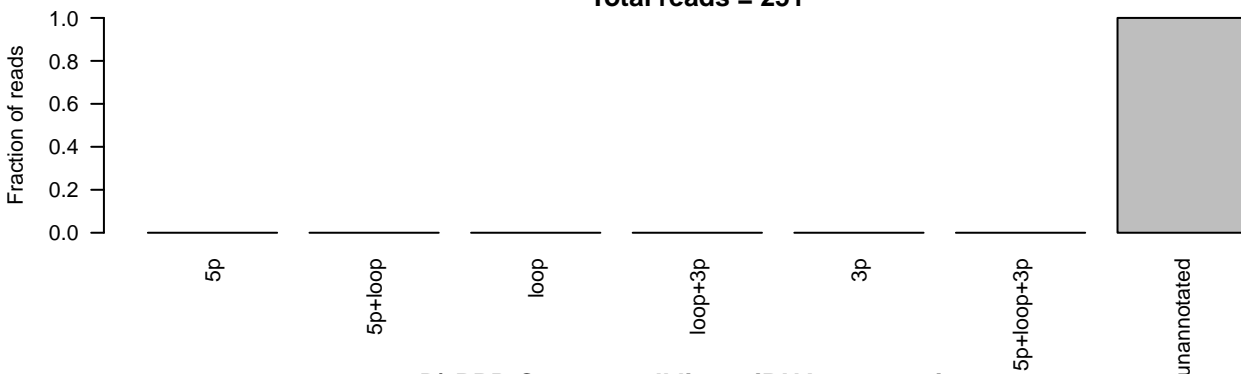

**D) PPB Case 14 cell line miRNA sequencing**  
ID=MI0002468\_1;accession\_number=MI0002468;Name=hsa-mir-484  
Total reads = 18

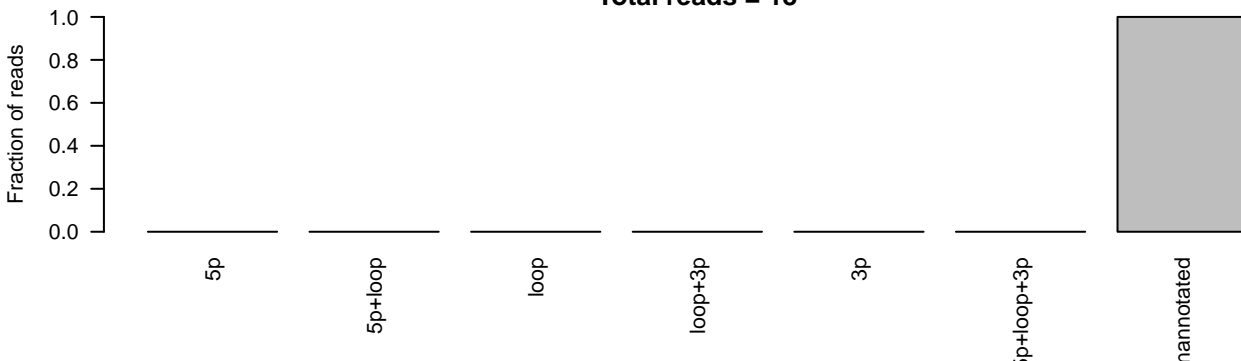

### B) Normal fibroblast miRNA sequencing

ID=MI0000108\_1;accession\_number=MI0000108;Name=hsa-mir-103a-2

Total reads = 453

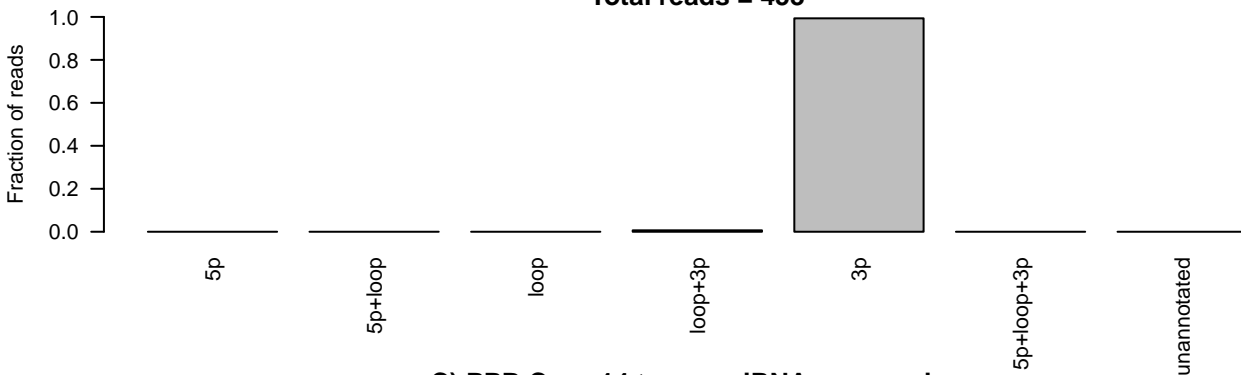

### C) PPB Case 14 tumor miRNA sequencing

ID=MI0000108\_1;accession\_number=MI0000108;Name=hsa-mir-103a-2

Total reads = 327

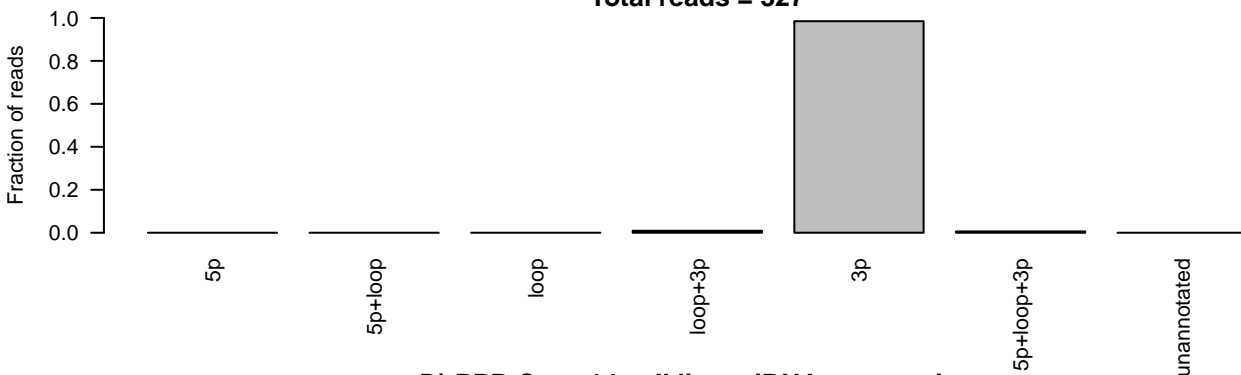

### D) PPB Case 14 cell line miRNA sequencing

ID=MI0000108\_1;accession\_number=MI0000108;Name=hsa-mir-103a-2

Total reads = 85

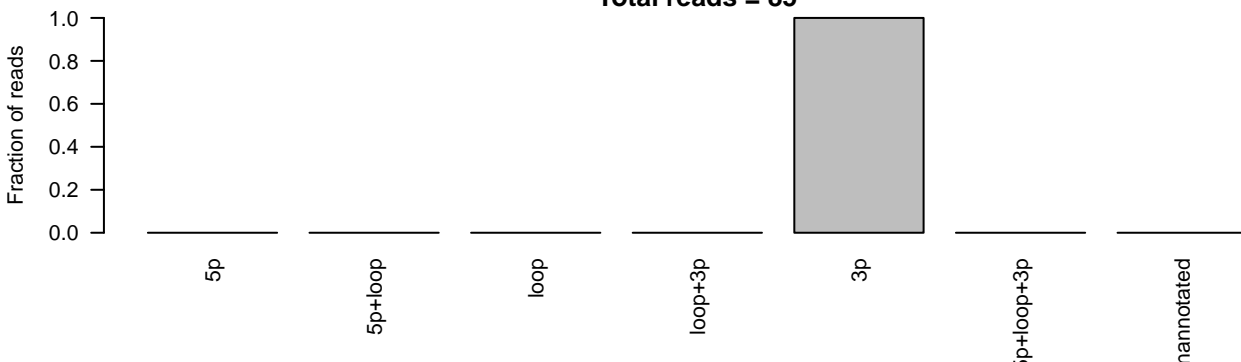

**B) Normal fibroblast miRNA sequencing**  
ID=MI0007262\_1;accession\_number=MI0007262;Name=hsa-mir-103b-2  
Total reads = 450

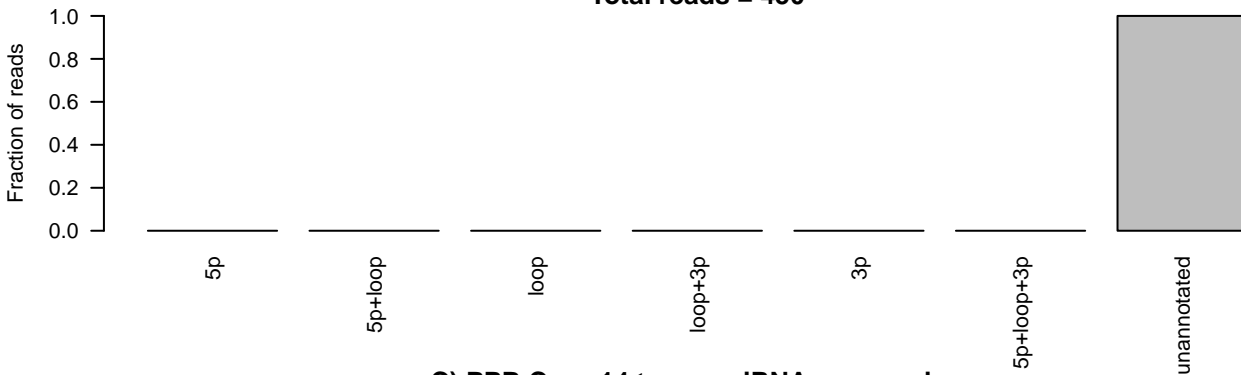

**C) PPB Case 14 tumor miRNA sequencing**  
ID=MI0007262\_1;accession\_number=MI0007262;Name=hsa-mir-103b-2  
Total reads = 322

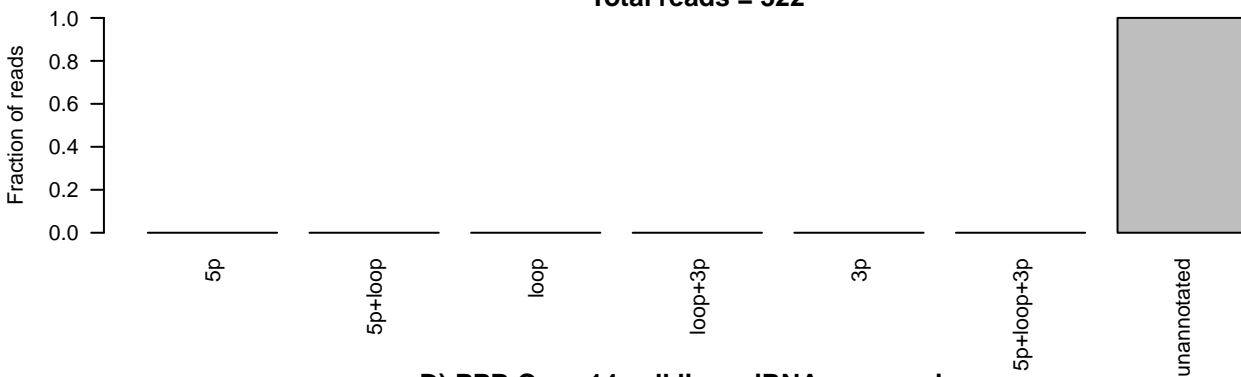

**D) PPB Case 14 cell line miRNA sequencing**  
ID=MI0007262\_1;accession\_number=MI0007262;Name=hsa-mir-103b-2  
Total reads = 85

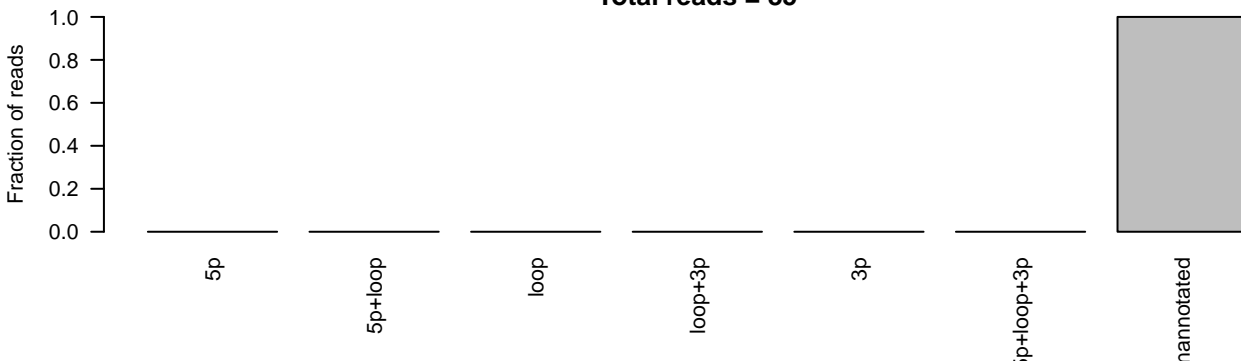

**B) Normal fibroblast miRNA sequencing**  
ID=MI0000681\_1;accession\_number=MI0000681;Name=hsa-mir-155  
Total reads = 33

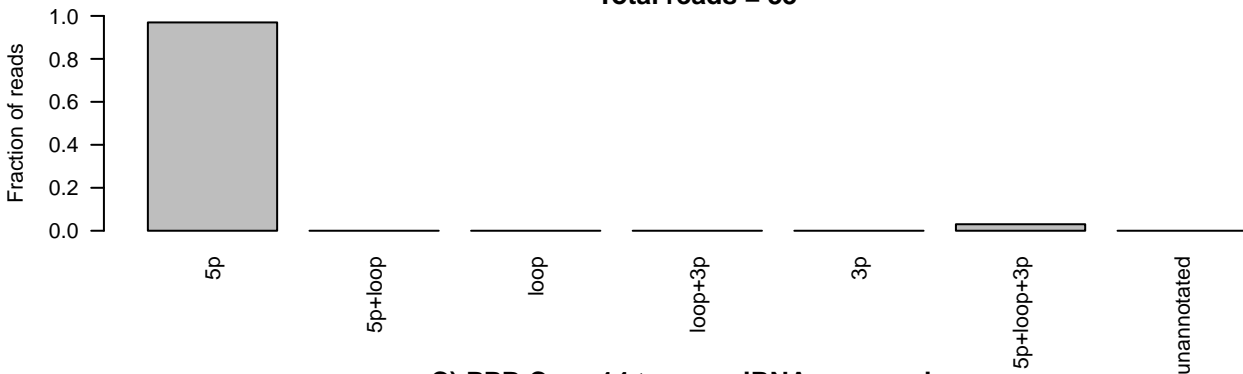

**C) PPB Case 14 tumor miRNA sequencing**  
ID=MI0000681\_1;accession\_number=MI0000681;Name=hsa-mir-155  
Total reads = 0

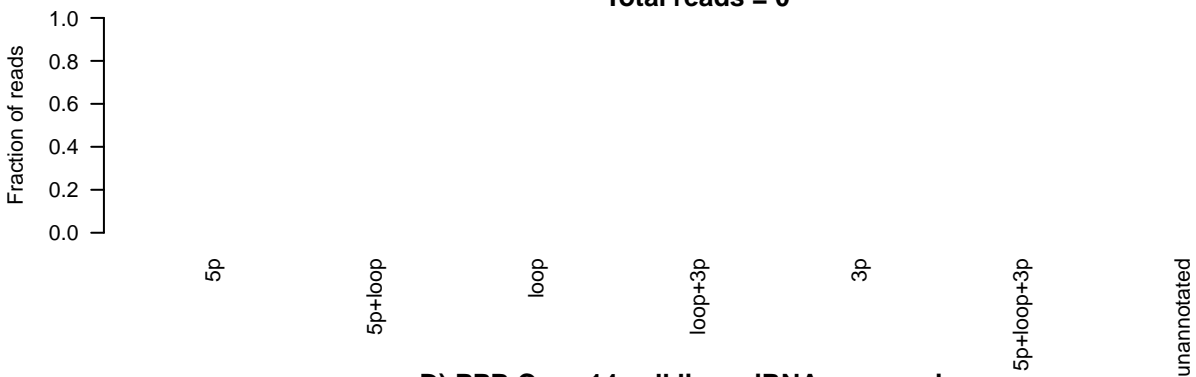

**D) PPB Case 14 cell line miRNA sequencing**  
ID=MI0000681\_1;accession\_number=MI0000681;Name=hsa-mir-155  
Total reads = 0



**B) Normal fibroblast miRNA sequencing**  
ID=MI0000459\_1;accession\_number=MI0000459;Name=hsa-mir-143  
Total reads = 103

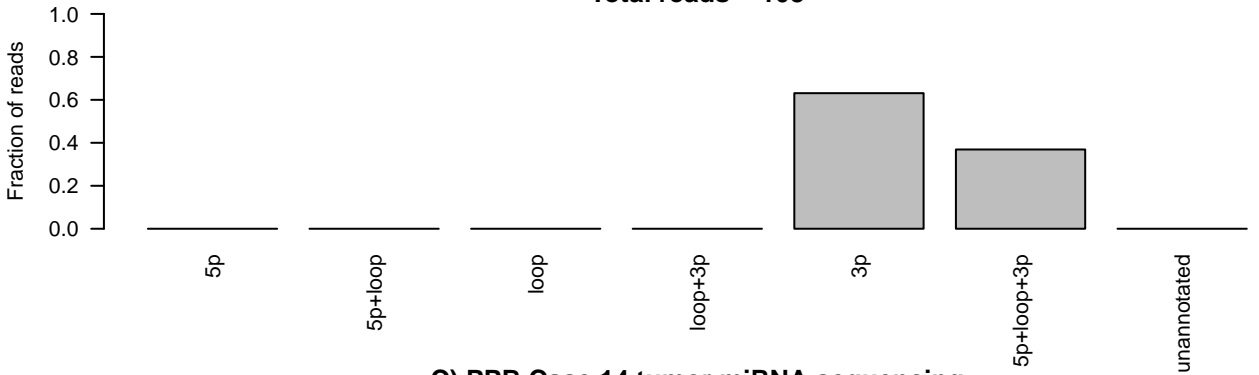

**C) PPB Case 14 tumor miRNA sequencing**  
ID=MI0000459\_1;accession\_number=MI0000459;Name=hsa-mir-143  
Total reads = 26

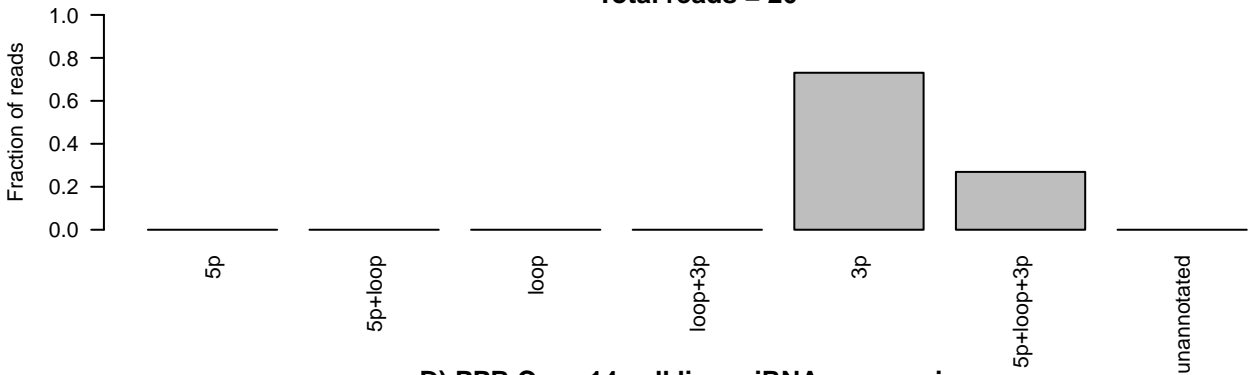

**D) PPB Case 14 cell line miRNA sequencing**  
ID=MI0000459\_1;accession\_number=MI0000459;Name=hsa-mir-143  
Total reads = 14

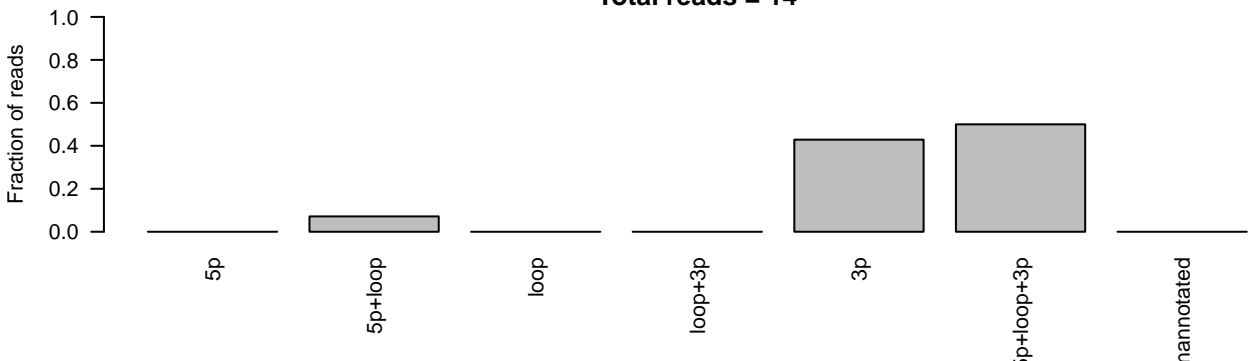



**B) Normal fibroblast miRNA sequencing**  
ID=MI0000469\_1;accession\_number=MI0000469;Name=hsa-mir-125a  
Total reads = 378

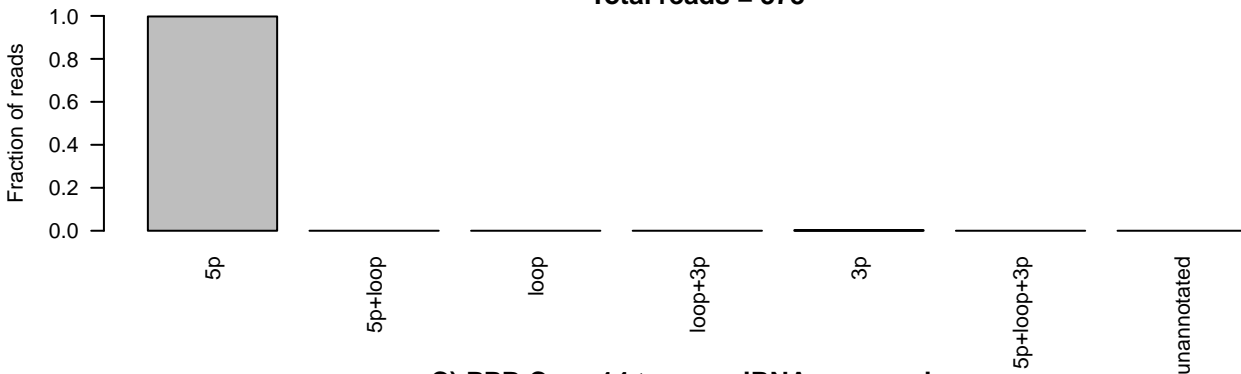

**C) PPB Case 14 tumor miRNA sequencing**  
ID=MI0000469\_1;accession\_number=MI0000469;Name=hsa-mir-125a  
Total reads = 15

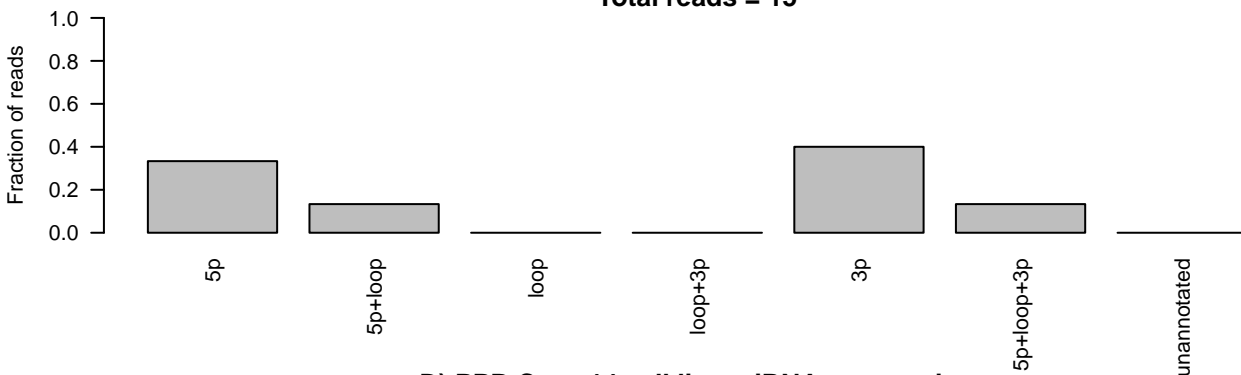

**D) PPB Case 14 cell line miRNA sequencing**  
ID=MI0000469\_1;accession\_number=MI0000469;Name=hsa-mir-125a  
Total reads = 1

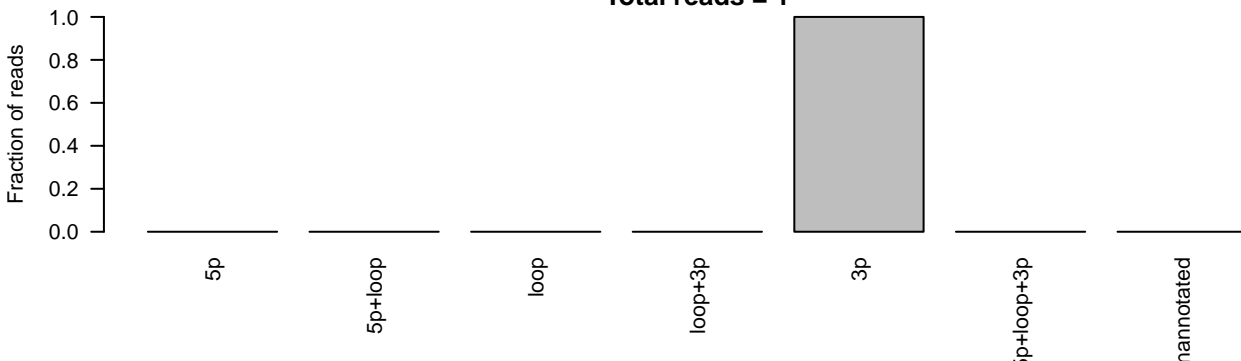

**B) Normal fibroblast miRNA sequencing**  
ID=MI0000070\_1;accession\_number=MI0000070;Name=hsa-mir-16-1  
Total reads = 354

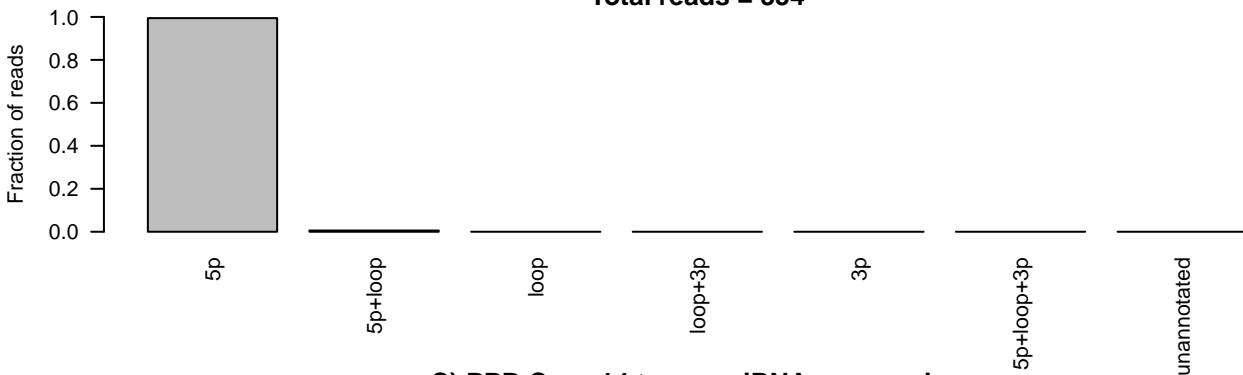

**C) PPB Case 14 tumor miRNA sequencing**  
ID=MI0000070\_1;accession\_number=MI0000070;Name=hsa-mir-16-1  
Total reads = 41

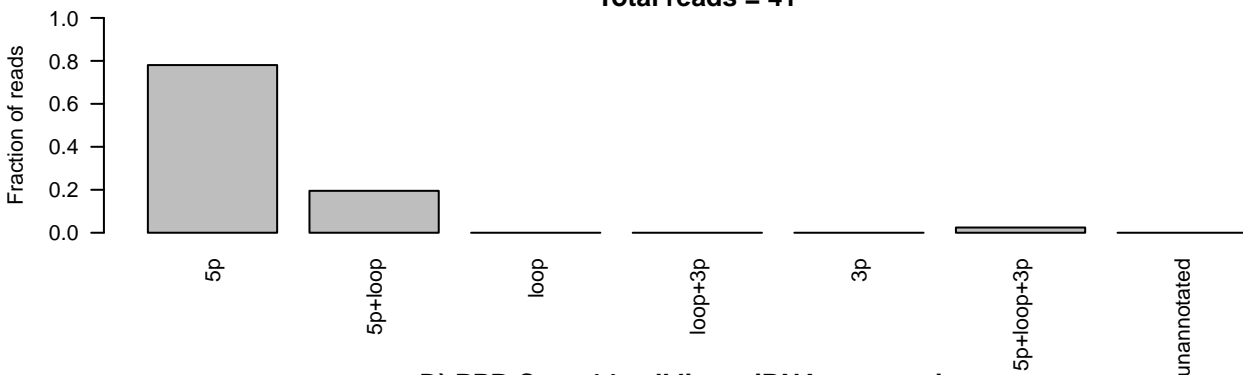

**D) PPB Case 14 cell line miRNA sequencing**  
ID=MI0000070\_1;accession\_number=MI0000070;Name=hsa-mir-16-1  
Total reads = 5

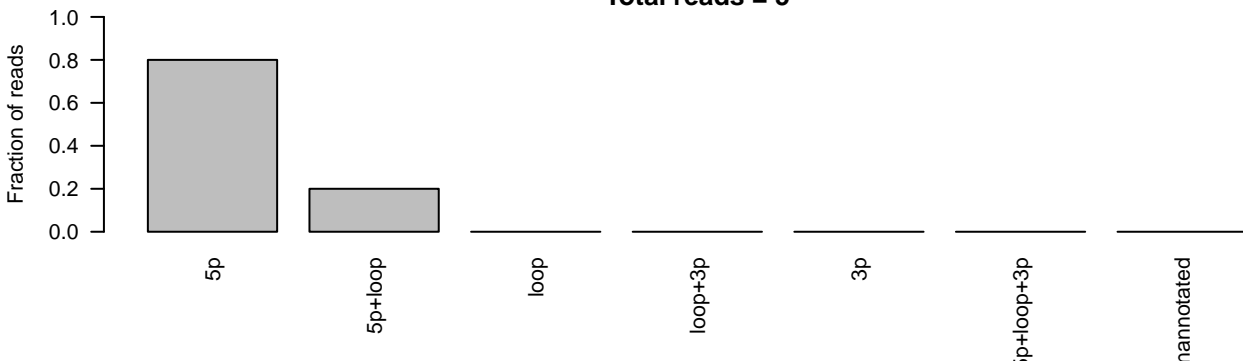

**B) Normal fibroblast miRNA sequencing**  
ID=MI0000067\_1;accession\_number=MI0000067;Name=hsa-let-7f-1  
Total reads = 346

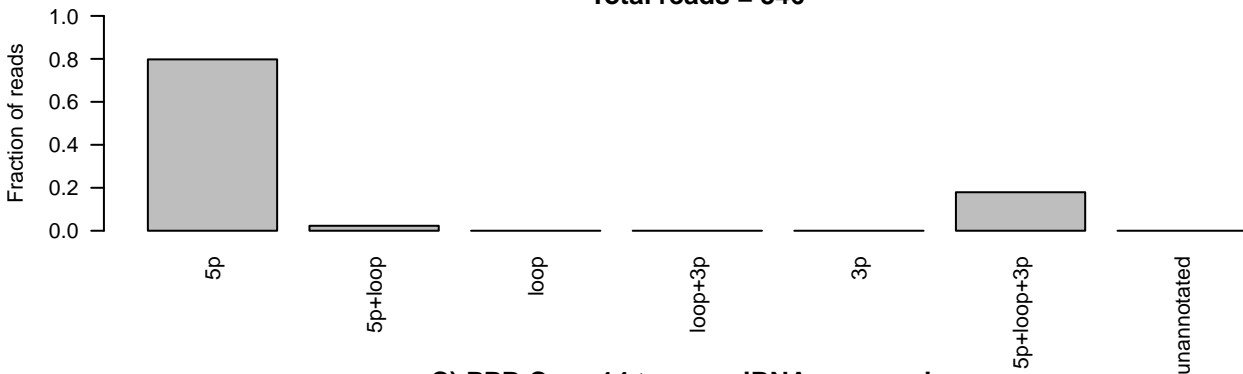

**C) PPB Case 14 tumor miRNA sequencing**  
ID=MI0000067\_1;accession\_number=MI0000067;Name=hsa-let-7f-1  
Total reads = 158

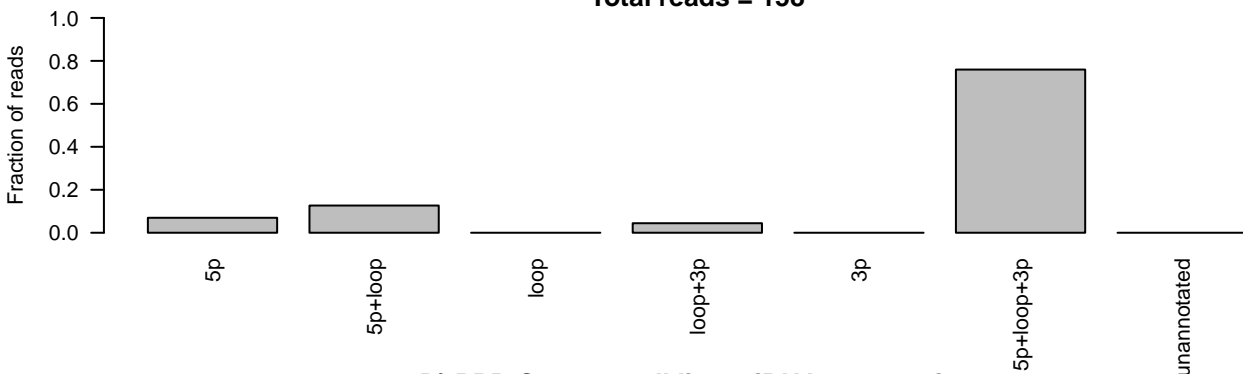

**D) PPB Case 14 cell line miRNA sequencing**  
ID=MI0000067\_1;accession\_number=MI0000067;Name=hsa-let-7f-1  
Total reads = 19

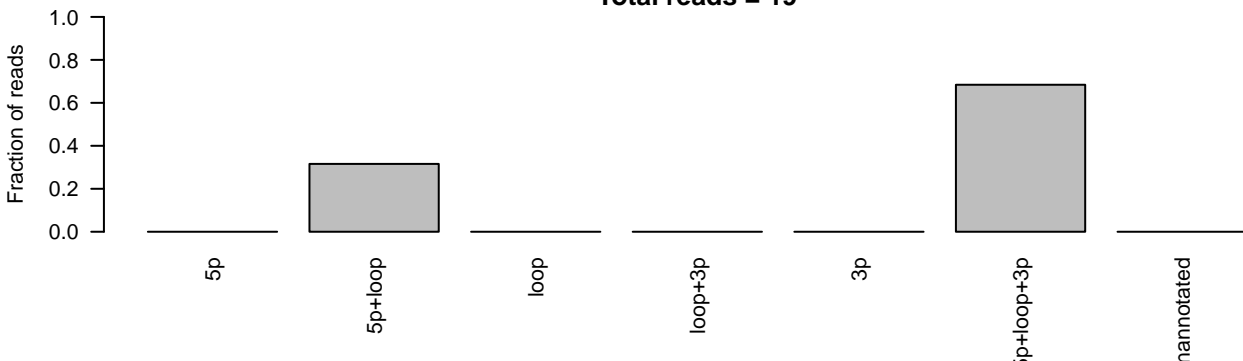

**B) Normal fibroblast miRNA sequencing**  
ID=MI0000299\_1;accession\_number=MI0000299;Name=hsa-mir-222  
Total reads = 343

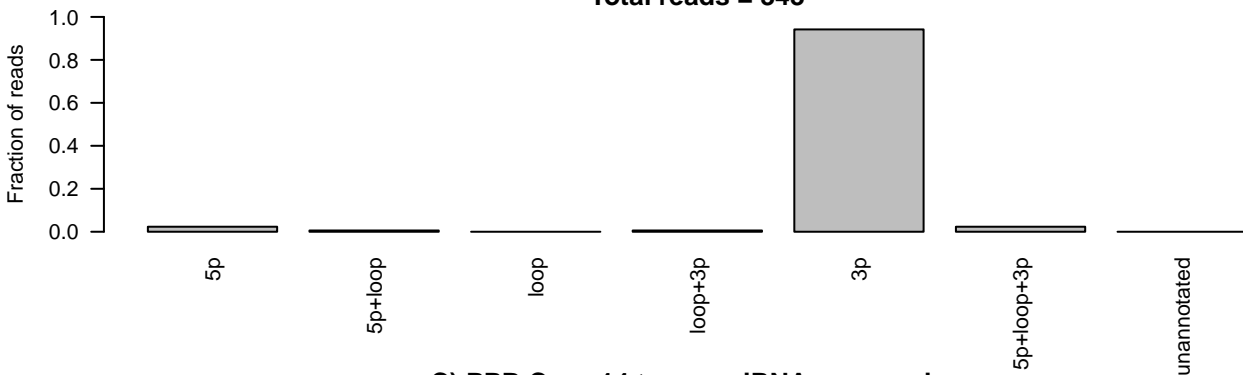

**C) PPB Case 14 tumor miRNA sequencing**  
ID=MI0000299\_1;accession\_number=MI0000299;Name=hsa-mir-222  
Total reads = 0

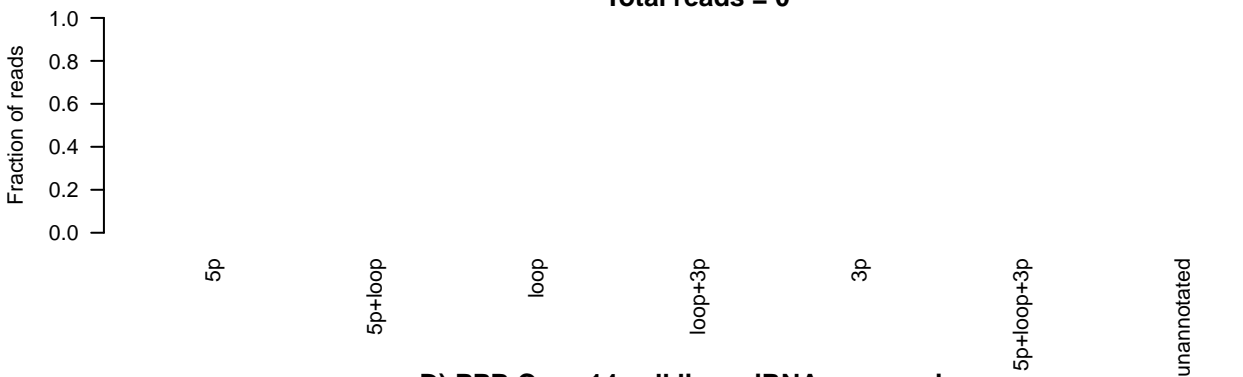

**D) PPB Case 14 cell line miRNA sequencing**  
ID=MI0000299\_1;accession\_number=MI0000299;Name=hsa-mir-222  
Total reads = 17

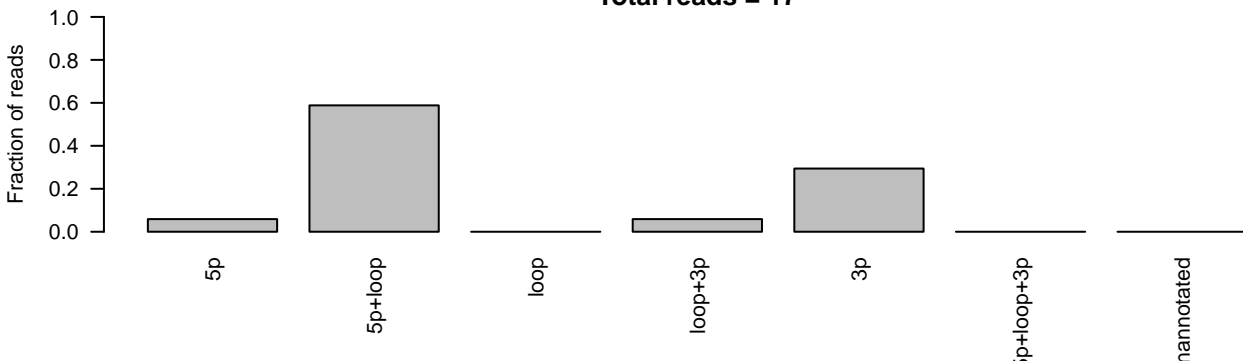

**B) Normal fibroblast miRNA sequencing**  
ID=MI0000079\_1;accession\_number=MI0000079;Name=hsa-mir-23a  
Total reads = 344

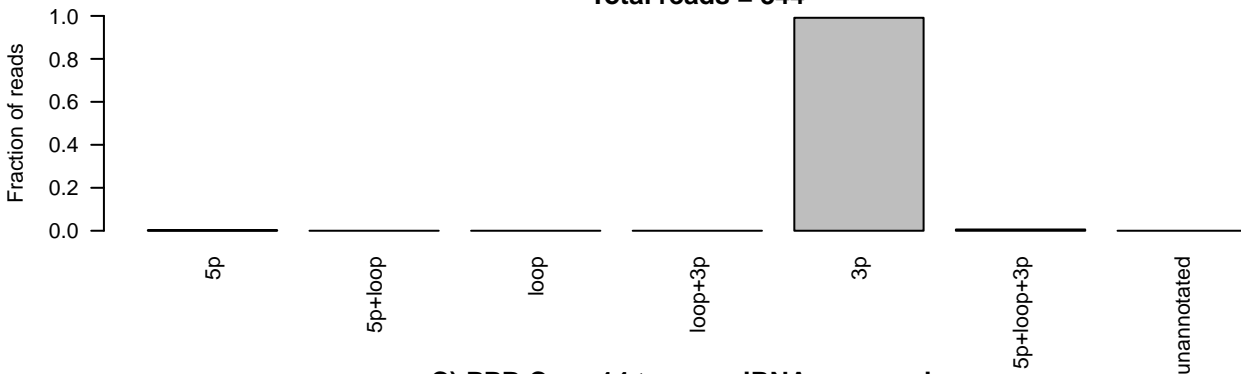

**C) PPB Case 14 tumor miRNA sequencing**  
ID=MI0000079\_1;accession\_number=MI0000079;Name=hsa-mir-23a  
Total reads = 56

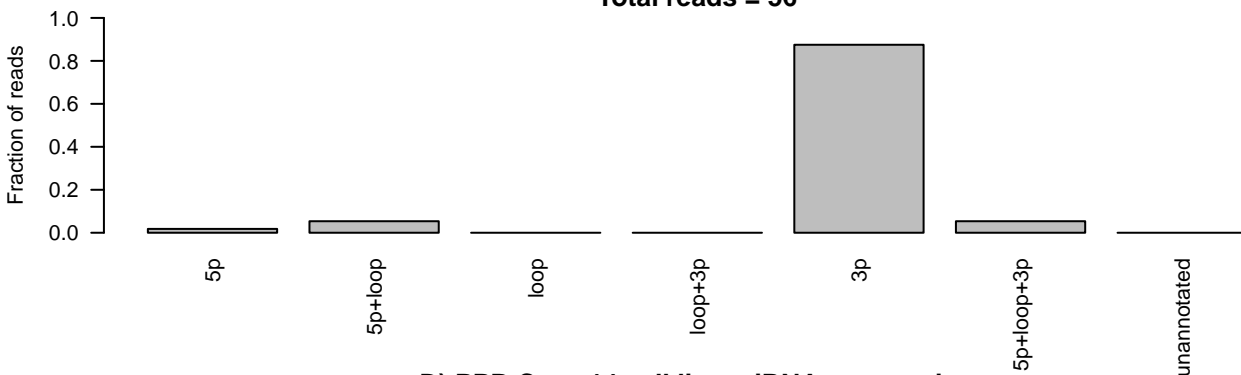

**D) PPB Case 14 cell line miRNA sequencing**  
ID=MI0000079\_1;accession\_number=MI0000079;Name=hsa-mir-23a  
Total reads = 25

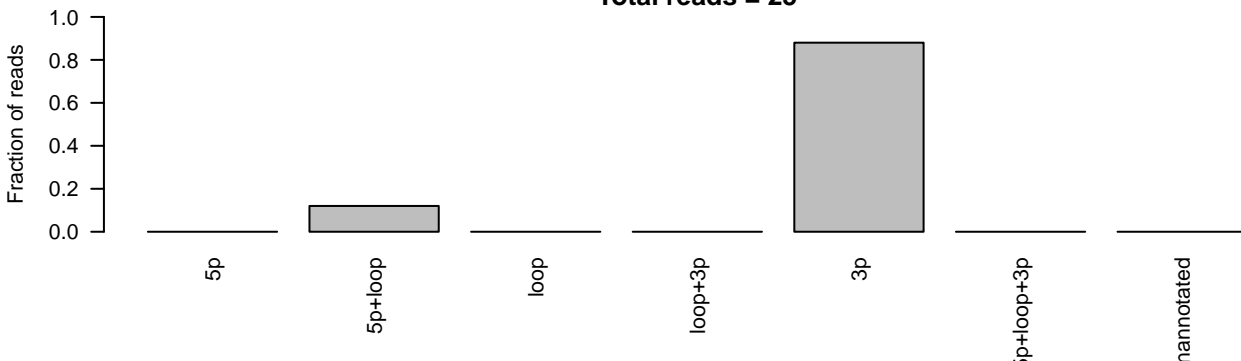

**B) Normal fibroblast miRNA sequencing**  
ID=MI0000745\_1;accession\_number=MI0000745;Name=hsa-mir-301a  
Total reads = 343

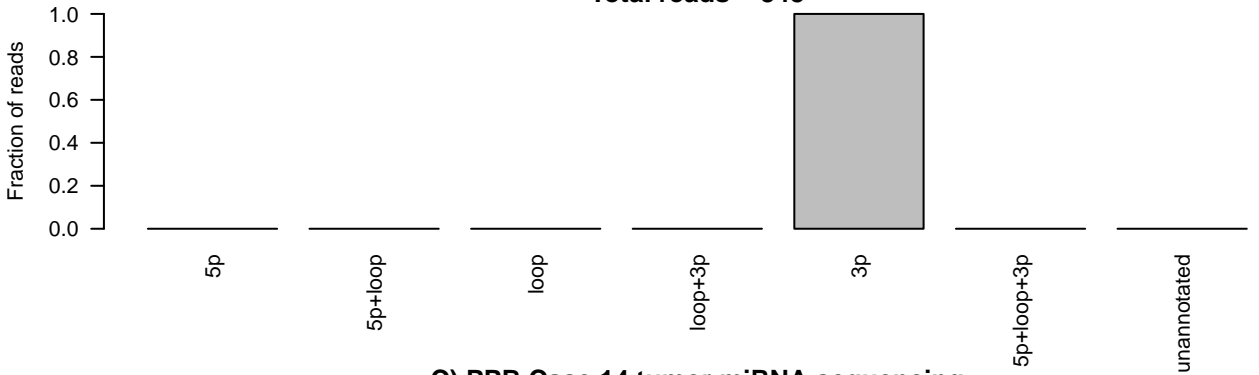

**C) PPB Case 14 tumor miRNA sequencing**  
ID=MI0000745\_1;accession\_number=MI0000745;Name=hsa-mir-301a  
Total reads = 2278

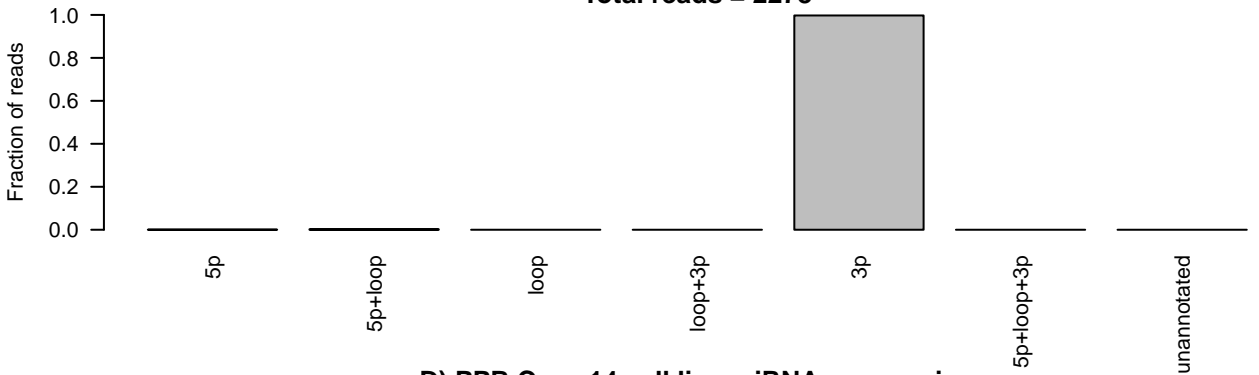

**D) PPB Case 14 cell line miRNA sequencing**  
ID=MI0000745\_1;accession\_number=MI0000745;Name=hsa-mir-301a  
Total reads = 200

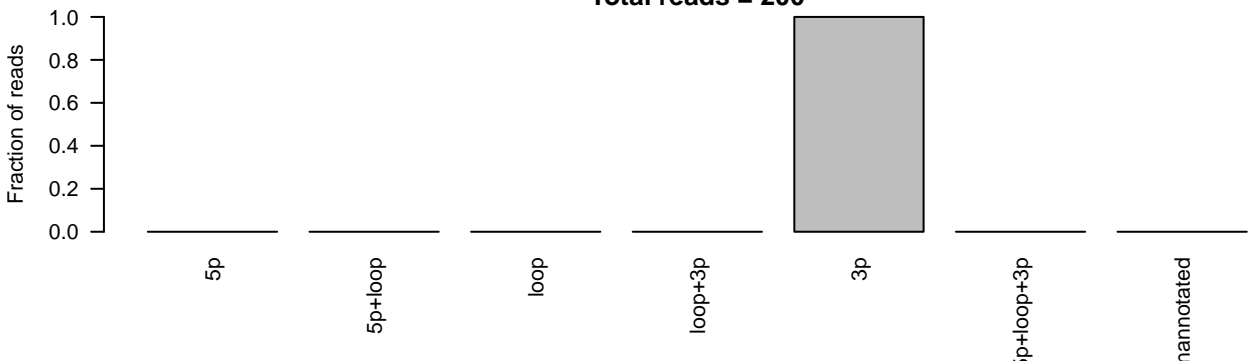

**B) Normal fibroblast miRNA sequencing**  
ID=MI0000805\_1;accession\_number=MI0000805;Name=hsa-mir-342  
Total reads = 298

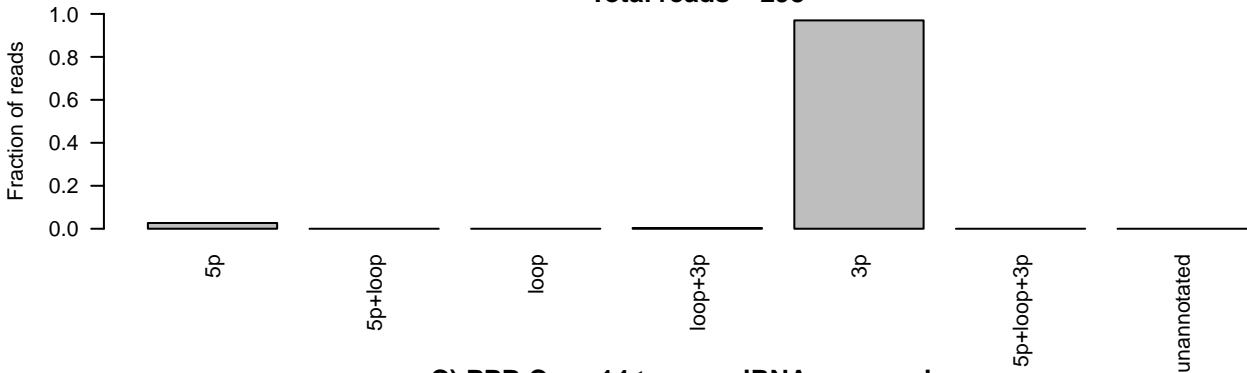

**C) PPB Case 14 tumor miRNA sequencing**  
ID=MI0000805\_1;accession\_number=MI0000805;Name=hsa-mir-342  
Total reads = 159

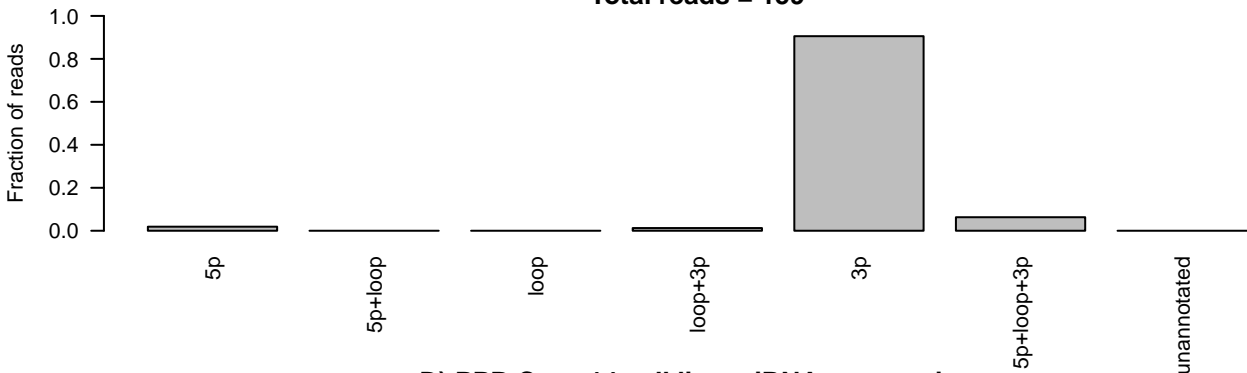

**D) PPB Case 14 cell line miRNA sequencing**  
ID=MI0000805\_1;accession\_number=MI0000805;Name=hsa-mir-342  
Total reads = 98

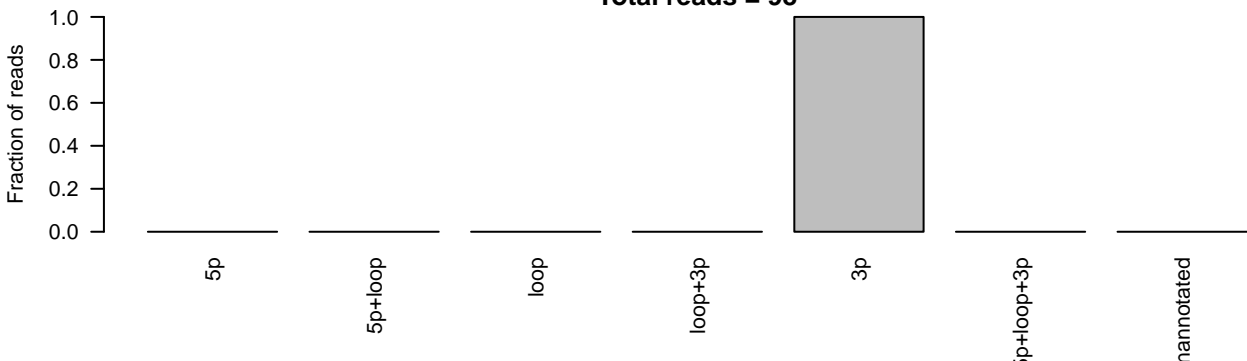

**B) Normal fibroblast miRNA sequencing**  
ID=MI0003575\_1;accession\_number=MI0003575;Name=hsa-mir-551b  
Total reads = 291

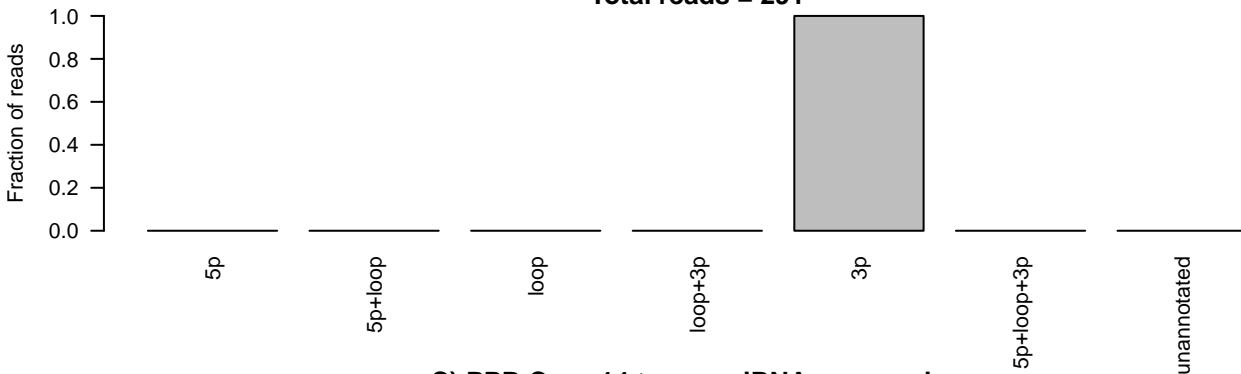

**C) PPB Case 14 tumor miRNA sequencing**  
ID=MI0003575\_1;accession\_number=MI0003575;Name=hsa-mir-551b  
Total reads = 22

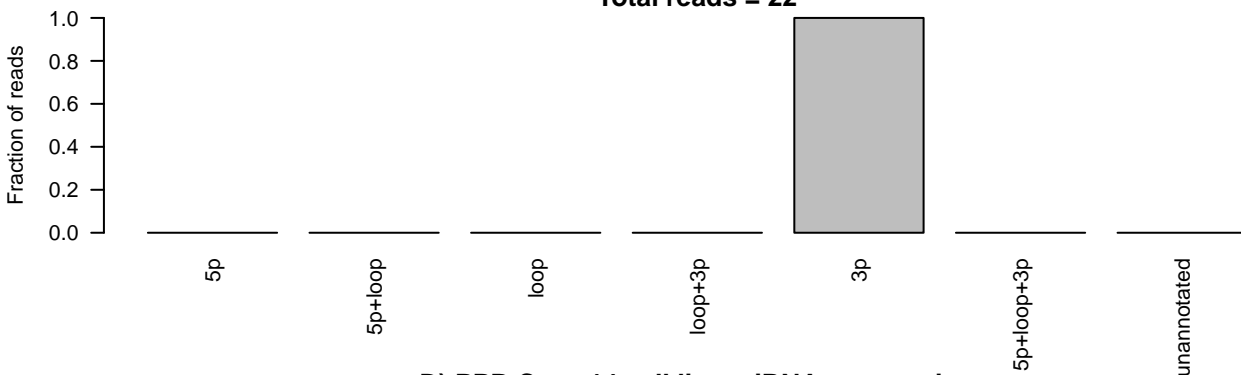

**D) PPB Case 14 cell line miRNA sequencing**  
ID=MI0003575\_1;accession\_number=MI0003575;Name=hsa-mir-551b  
Total reads = 0

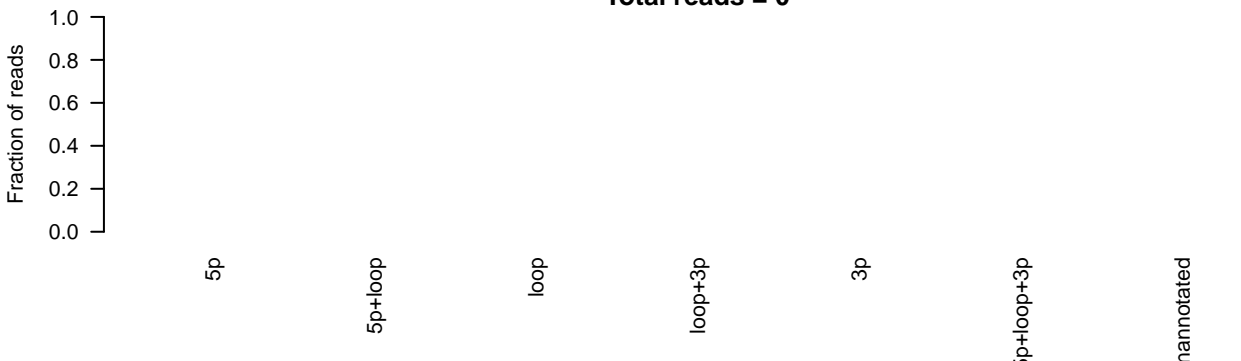



**B) Normal fibroblast miRNA sequencing**  
ID=MI0003135\_1;accession\_number=MI0003135;Name=hsa-mir-495  
Total reads = 275

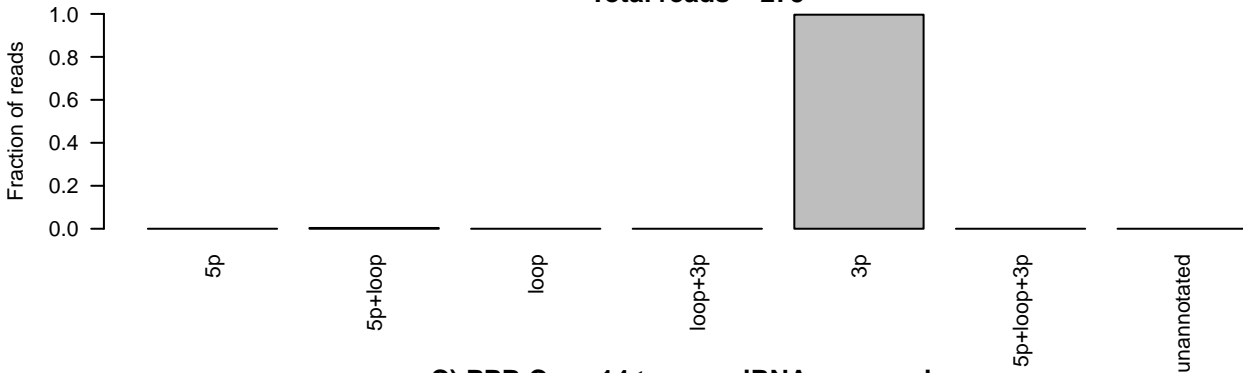

**C) PPB Case 14 tumor miRNA sequencing**  
ID=MI0003135\_1;accession\_number=MI0003135;Name=hsa-mir-495  
Total reads = 1653

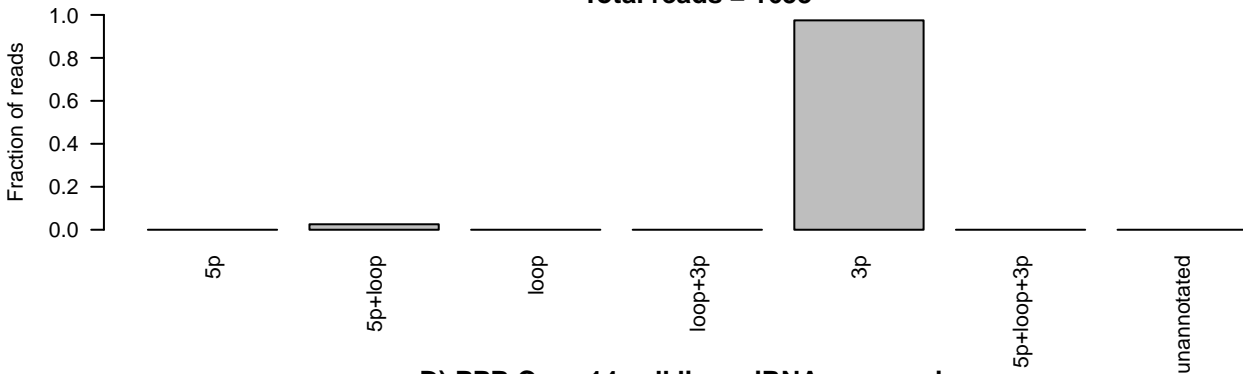

**D) PPB Case 14 cell line miRNA sequencing**  
ID=MI0003135\_1;accession\_number=MI0003135;Name=hsa-mir-495  
Total reads = 117

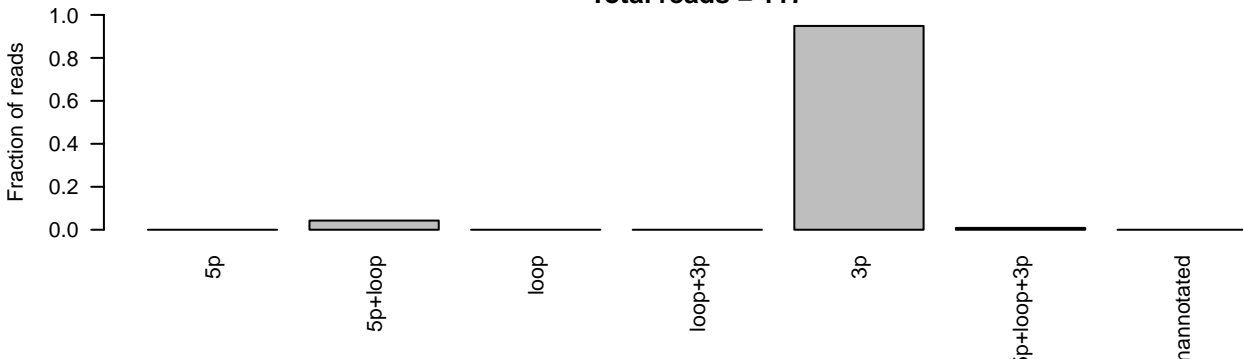

**B) Normal fibroblast miRNA sequencing**  
ID=MI0000736\_1;accession\_number=MI0000736;Name=hsa-mir-30c-1  
Total reads = 247

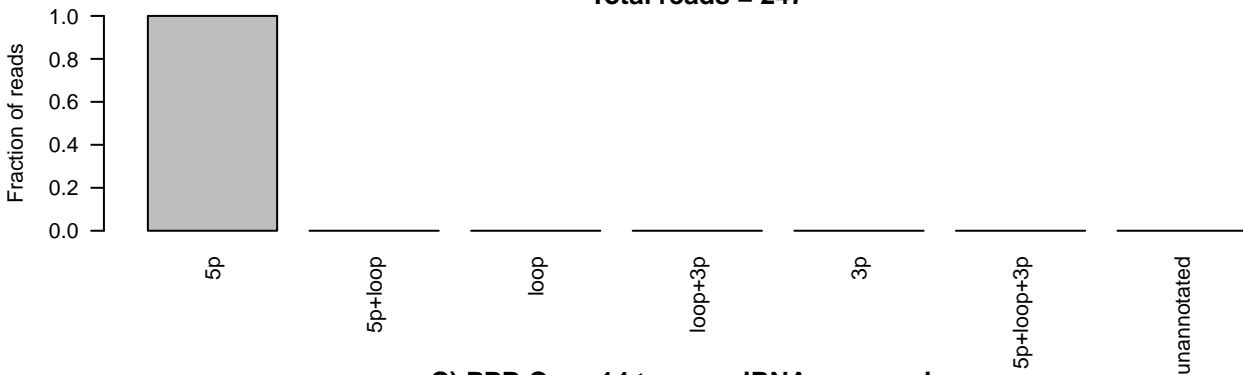

**C) PPB Case 14 tumor miRNA sequencing**  
ID=MI0000736\_1;accession\_number=MI0000736;Name=hsa-mir-30c-1  
Total reads = 237

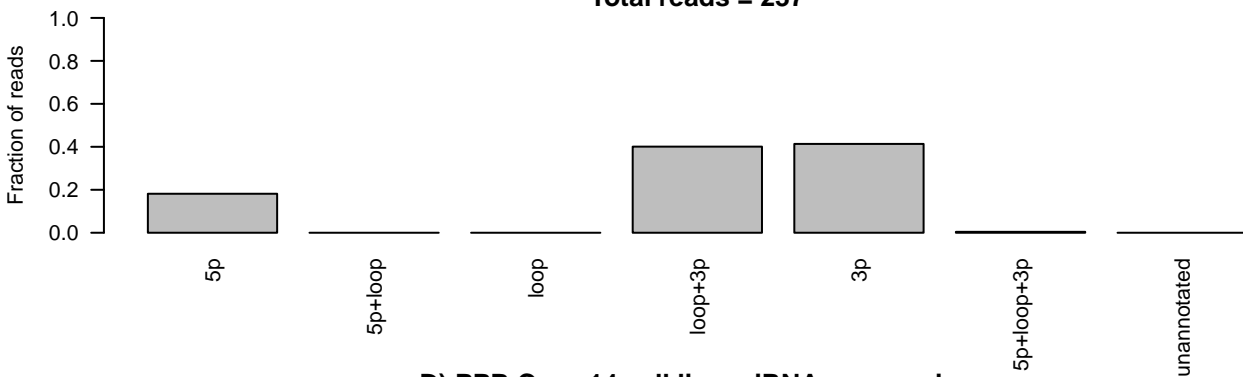

**D) PPB Case 14 cell line miRNA sequencing**  
ID=MI0000736\_1;accession\_number=MI0000736;Name=hsa-mir-30c-1  
Total reads = 0



**B) Normal fibroblast miRNA sequencing**  
ID=MI0000542\_1;accession\_number=MI0000542;Name=hsa-mir-320a  
Total reads = 228

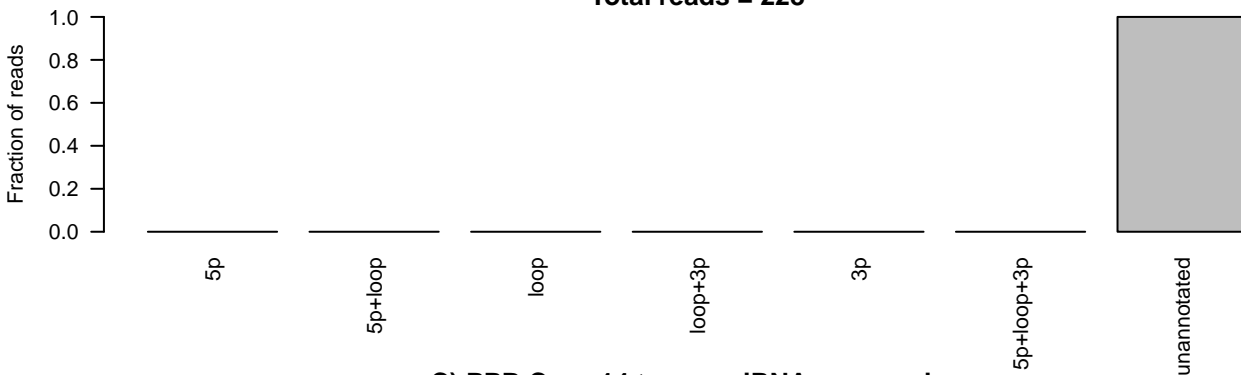

**C) PPB Case 14 tumor miRNA sequencing**  
ID=MI0000542\_1;accession\_number=MI0000542;Name=hsa-mir-320a  
Total reads = 96

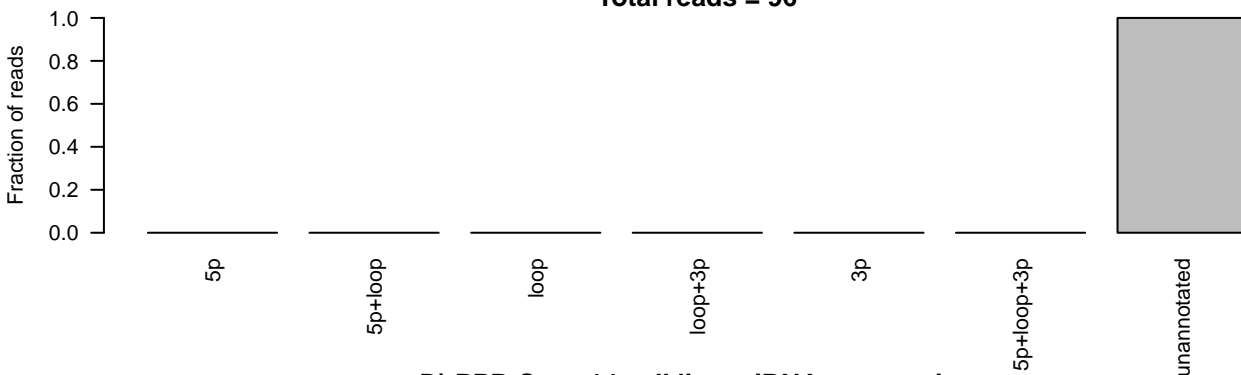

**D) PPB Case 14 cell line miRNA sequencing**  
ID=MI0000542\_1;accession\_number=MI0000542;Name=hsa-mir-320a  
Total reads = 103

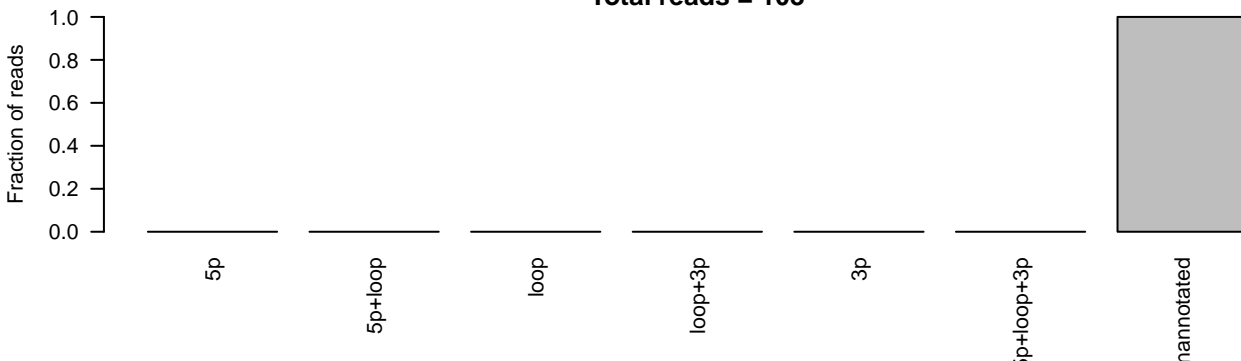

**B) Normal fibroblast miRNA sequencing**  
ID=MI0003530\_1;accession\_number=MI0003530;Name=hsa-mir-487b  
Total reads = 195

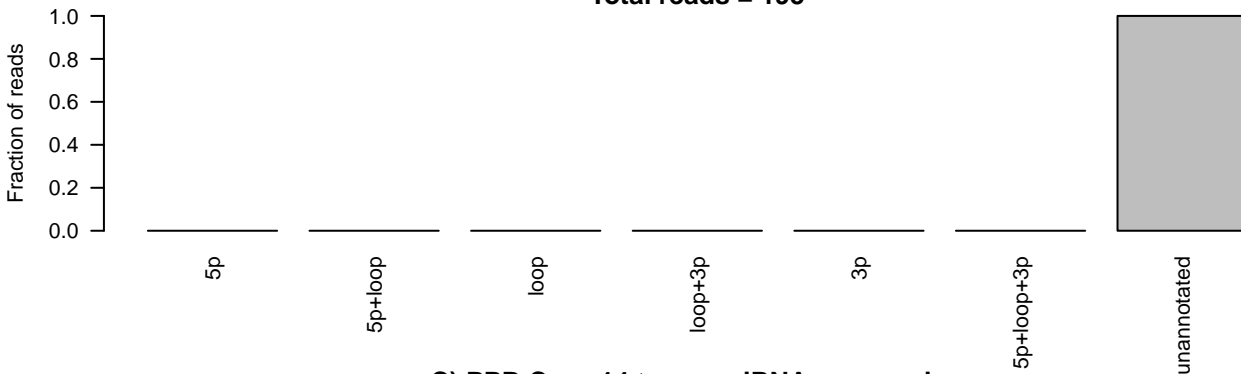

**C) PPB Case 14 tumor miRNA sequencing**  
ID=MI0003530\_1;accession\_number=MI0003530;Name=hsa-mir-487b  
Total reads = 856

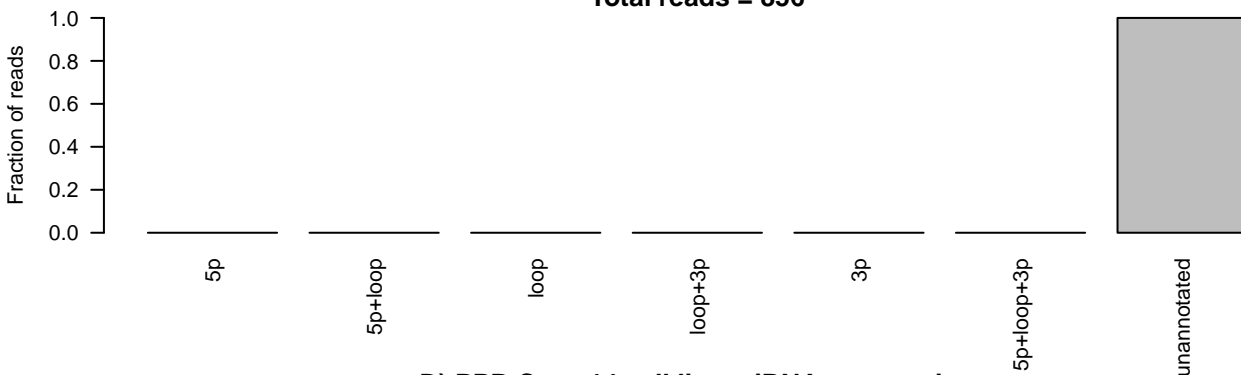

**D) PPB Case 14 cell line miRNA sequencing**  
ID=MI0003530\_1;accession\_number=MI0003530;Name=hsa-mir-487b  
Total reads = 107

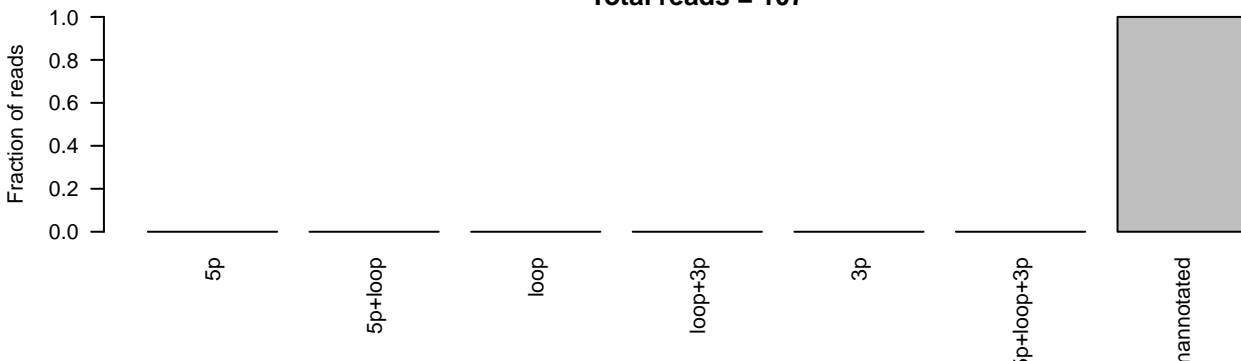

**B) Normal fibroblast miRNA sequencing**  
ID=MI0000102\_1;accession\_number=MI0000102;Name=hsa-mir-100  
Total reads = 172

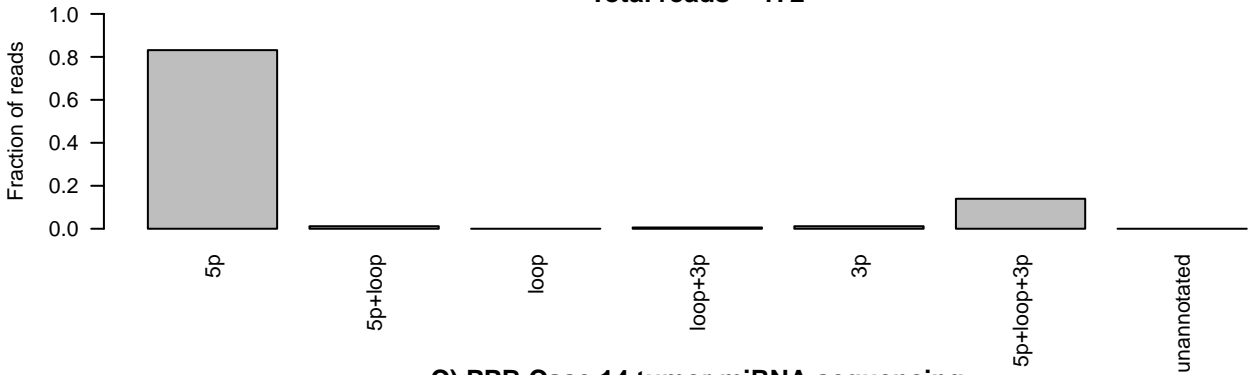

**C) PPB Case 14 tumor miRNA sequencing**  
ID=MI0000102\_1;accession\_number=MI0000102;Name=hsa-mir-100  
Total reads = 43

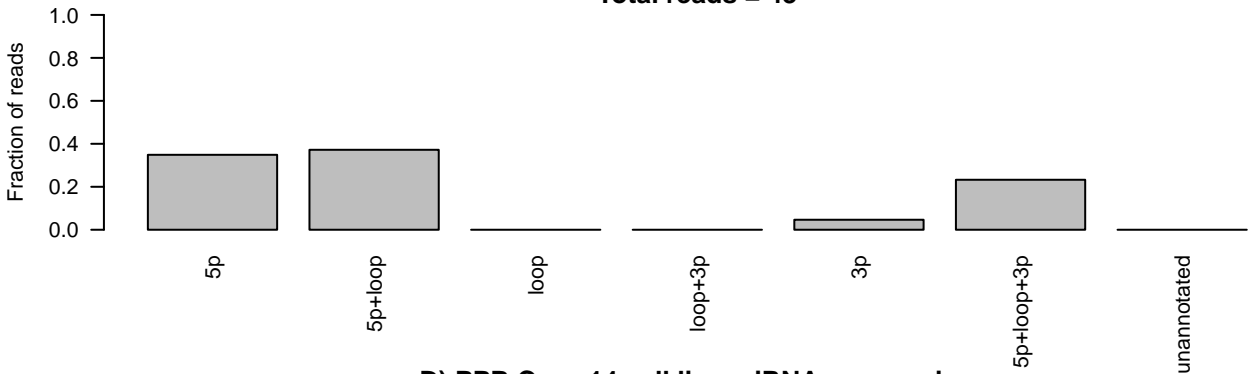

**D) PPB Case 14 cell line miRNA sequencing**  
ID=MI0000102\_1;accession\_number=MI0000102;Name=hsa-mir-100  
Total reads = 21

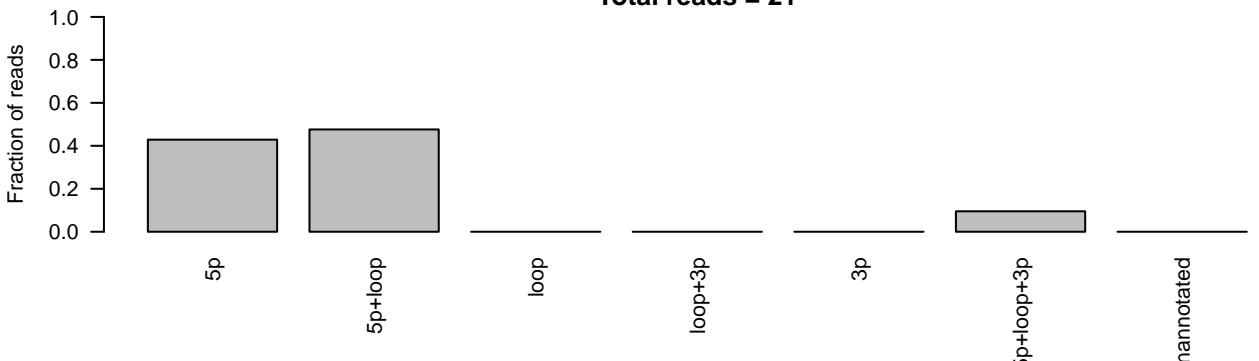

**B) Normal fibroblast miRNA sequencing**  
ID=MI0001735\_1;accession\_number=MI0001735;Name=hsa-mir-409  
Total reads = 152

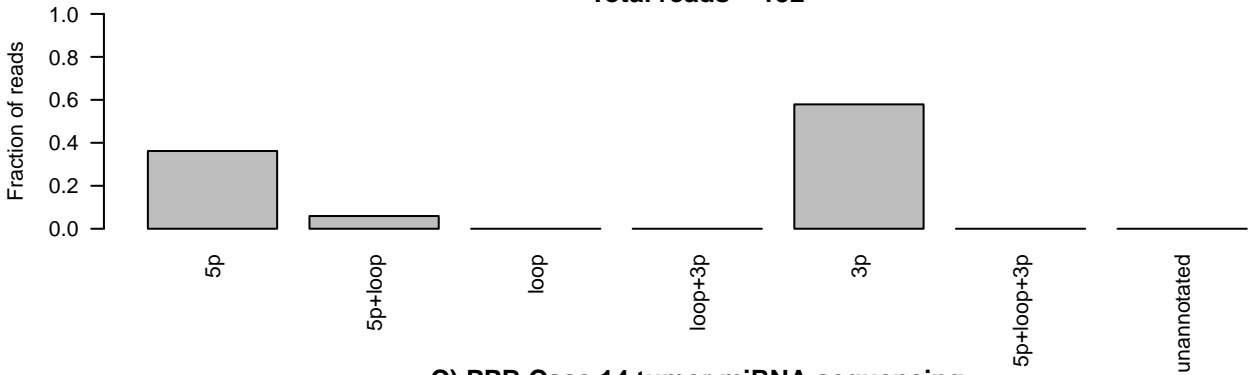

**C) PPB Case 14 tumor miRNA sequencing**  
ID=MI0001735\_1;accession\_number=MI0001735;Name=hsa-mir-409  
Total reads = 2665

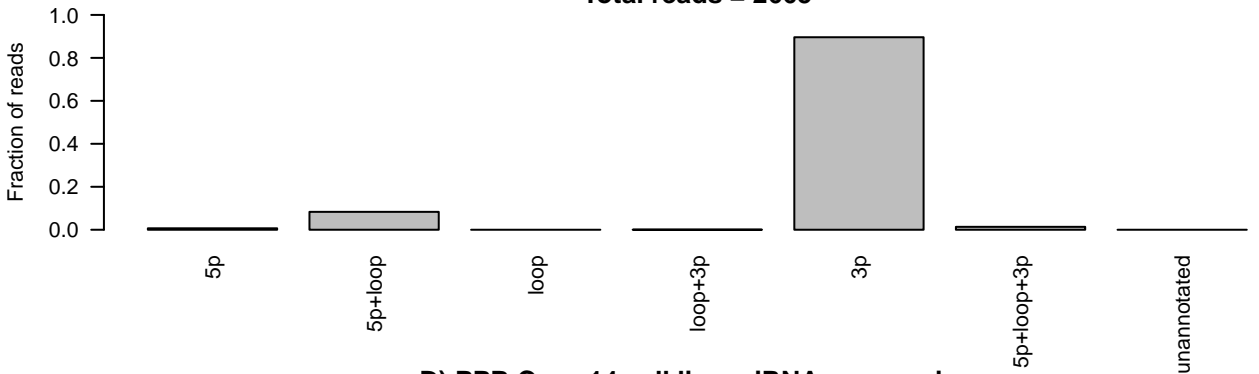

**D) PPB Case 14 cell line miRNA sequencing**  
ID=MI0001735\_1;accession\_number=MI0001735;Name=hsa-mir-409  
Total reads = 284

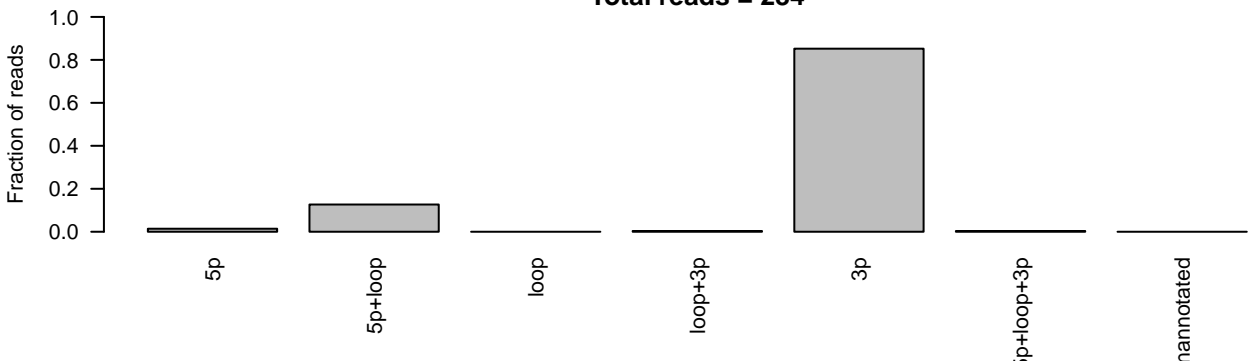

**B) Normal fibroblast miRNA sequencing**  
ID=MI0000066\_1;accession\_number=MI0000066;Name=hsa-let-7e  
Total reads = 130

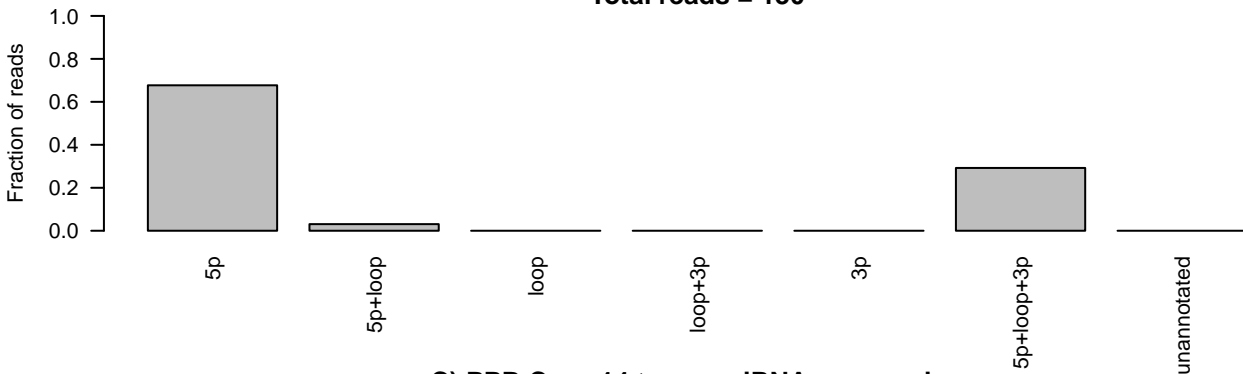

**C) PPB Case 14 tumor miRNA sequencing**  
ID=MI0000066\_1;accession\_number=MI0000066;Name=hsa-let-7e  
Total reads = 222

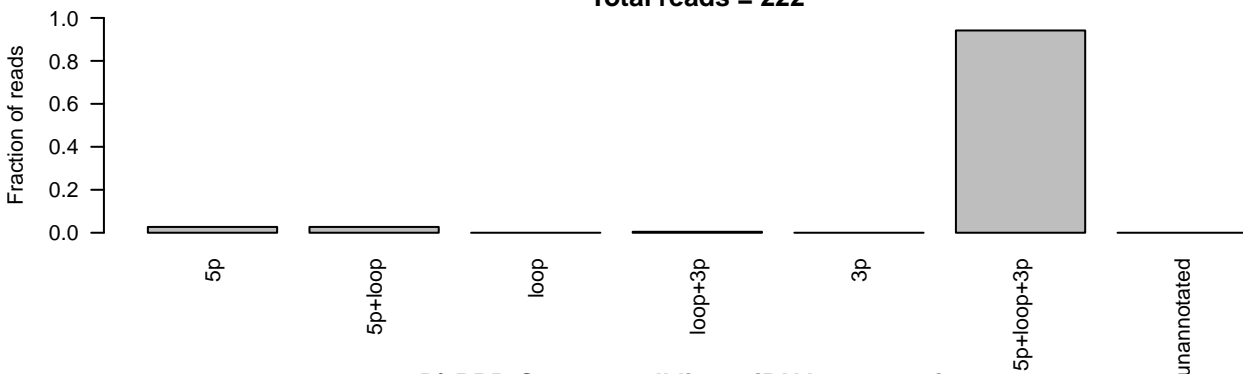

**D) PPB Case 14 cell line miRNA sequencing**  
ID=MI0000066\_1;accession\_number=MI0000066;Name=hsa-let-7e  
Total reads = 23

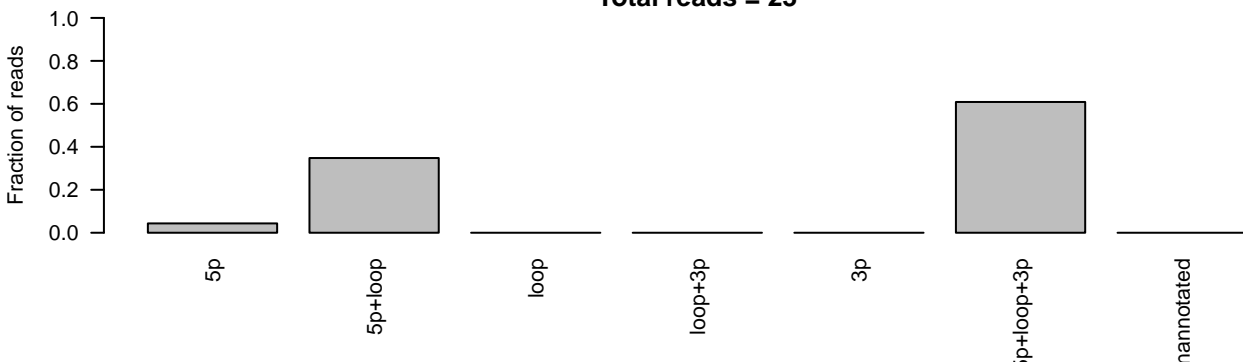

**B) Normal fibroblast miRNA sequencing**  
ID=MI0000113\_1;accession\_number=MI0000113;Name=hsa-mir-106a  
Total reads = 126

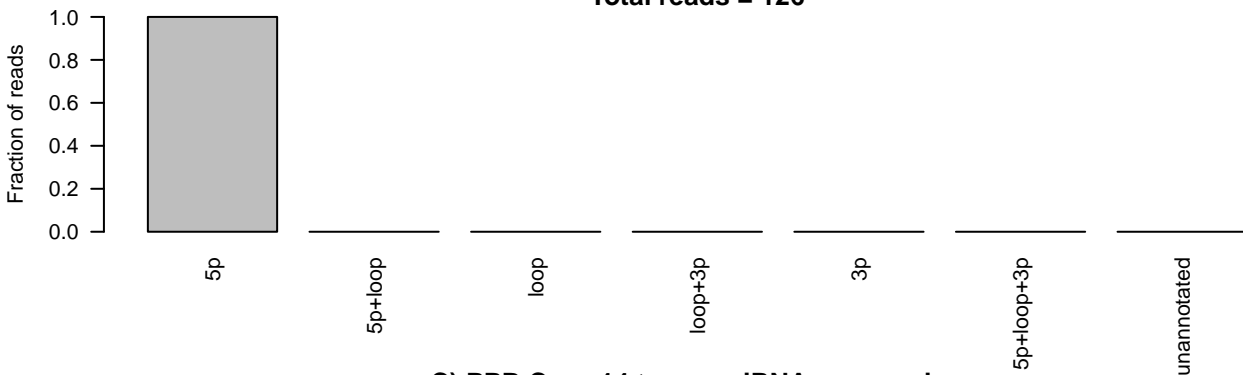

**C) PPB Case 14 tumor miRNA sequencing**  
ID=MI0000113\_1;accession\_number=MI0000113;Name=hsa-mir-106a  
Total reads = 2

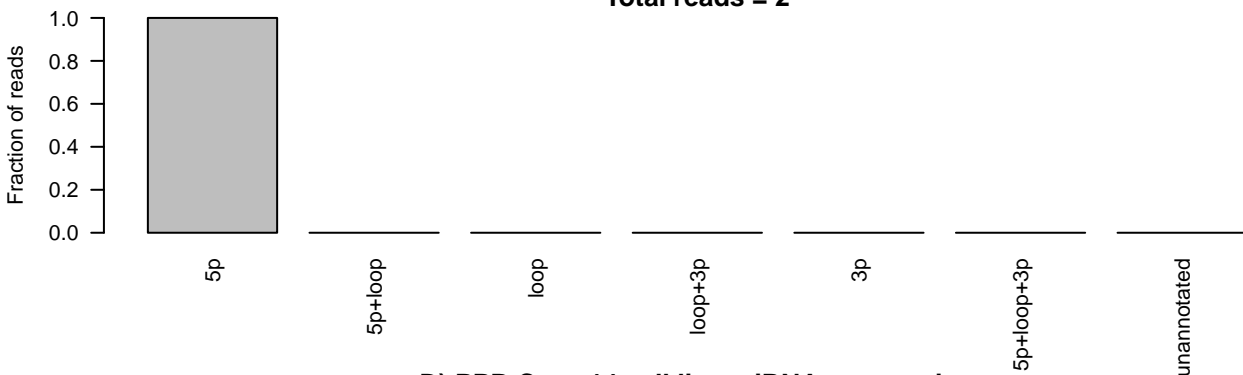

**D) PPB Case 14 cell line miRNA sequencing**  
ID=MI0000113\_1;accession\_number=MI0000113;Name=hsa-mir-106a  
Total reads = 1

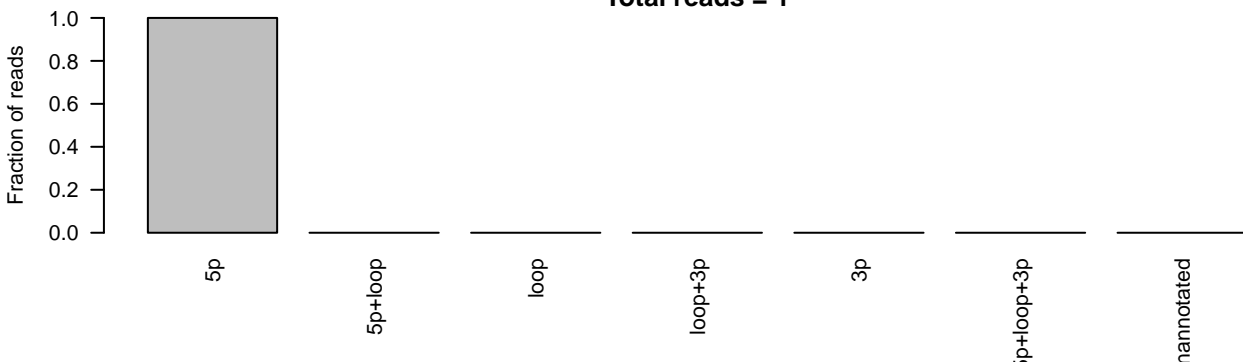



**B) Normal fibroblast miRNA sequencing**  
ID=MI0000069\_1;accession\_number=MI0000069;Name=hsa-mir-15a  
Total reads = 111

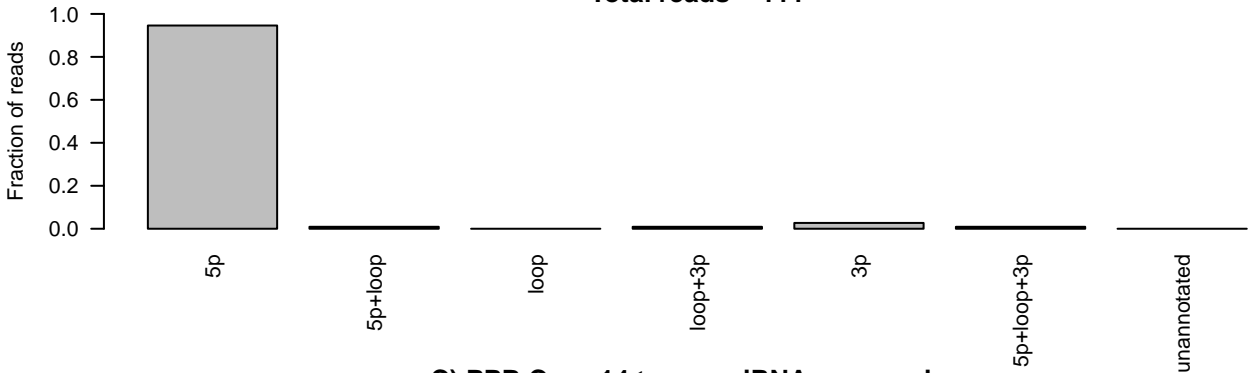

**C) PPB Case 14 tumor miRNA sequencing**  
ID=MI0000069\_1;accession\_number=MI0000069;Name=hsa-mir-15a  
Total reads = 1148

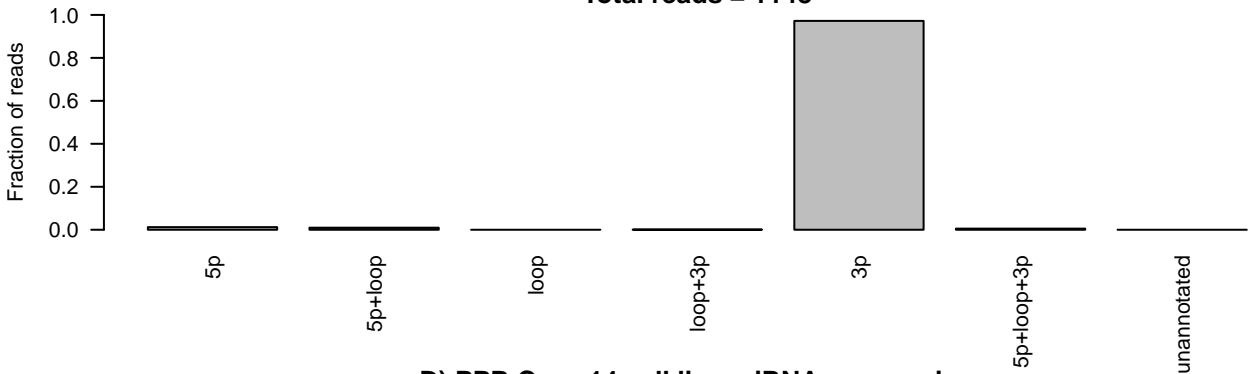

**D) PPB Case 14 cell line miRNA sequencing**  
ID=MI0000069\_1;accession\_number=MI0000069;Name=hsa-mir-15a  
Total reads = 10

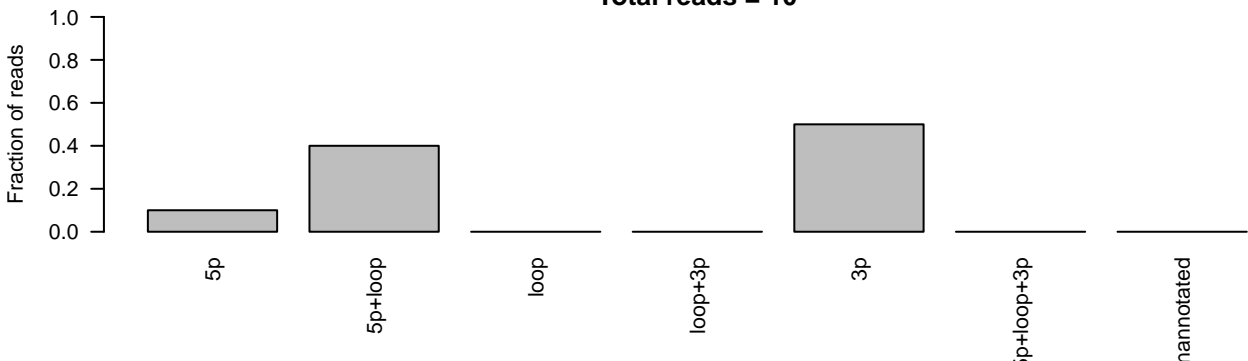

**B) Normal fibroblast miRNA sequencing**  
ID=MI0016053\_1;accession\_number=MI0016053;Name=hsa-mir-3653  
Total reads = 0

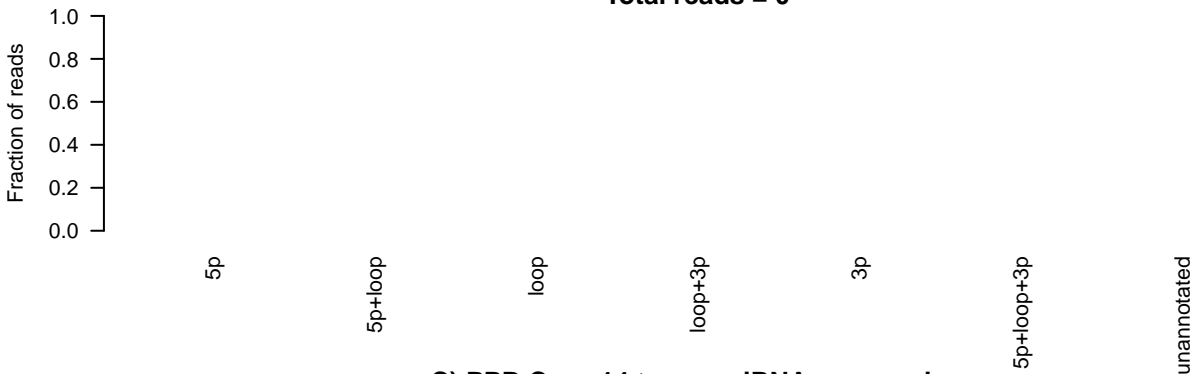

**C) PPB Case 14 tumor miRNA sequencing**  
ID=MI0016053\_1;accession\_number=MI0016053;Name=hsa-mir-3653  
Total reads = 0

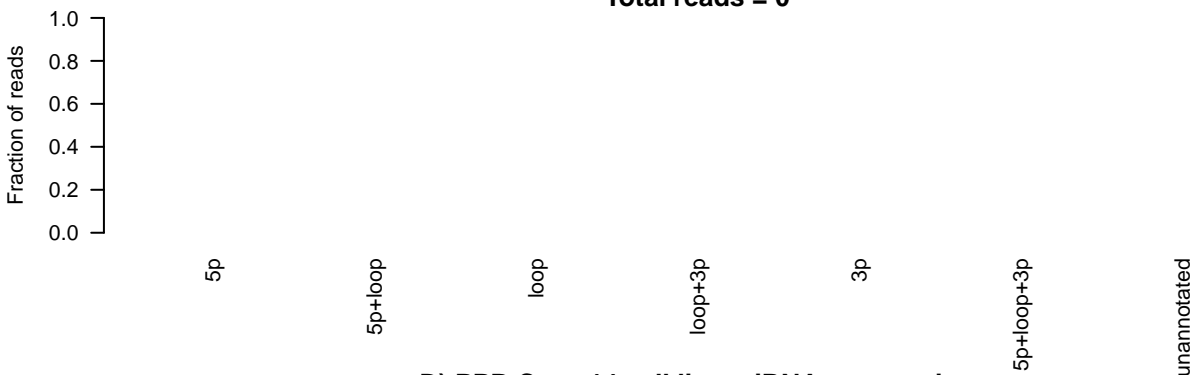

**D) PPB Case 14 cell line miRNA sequencing**  
ID=MI0016053\_1;accession\_number=MI0016053;Name=hsa-mir-3653  
Total reads = 0

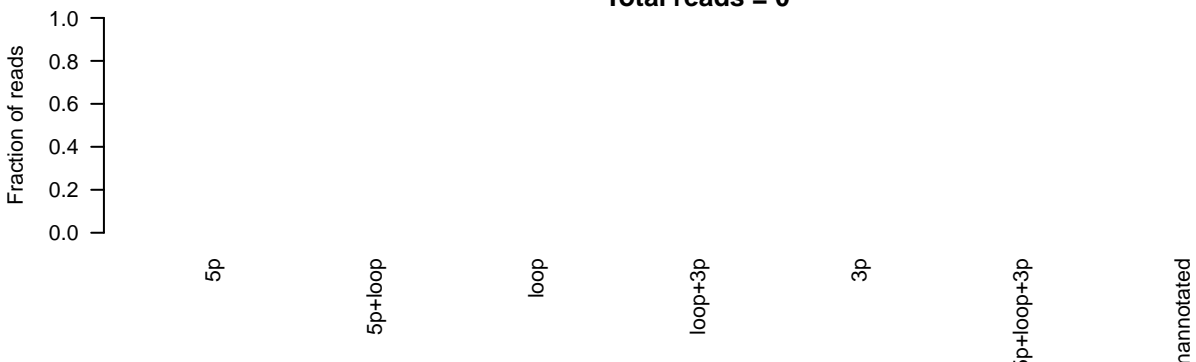

**B) Normal fibroblast miRNA sequencing**  
ID=MI0005565\_1;accession\_number=MI0005565;Name=hsa-mir-543  
Total reads = 104

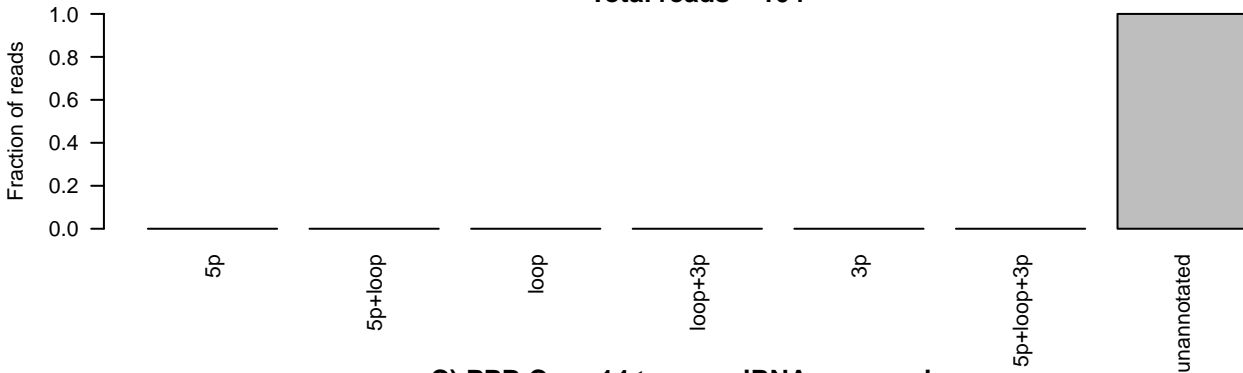

**C) PPB Case 14 tumor miRNA sequencing**  
ID=MI0005565\_1;accession\_number=MI0005565;Name=hsa-mir-543  
Total reads = 711

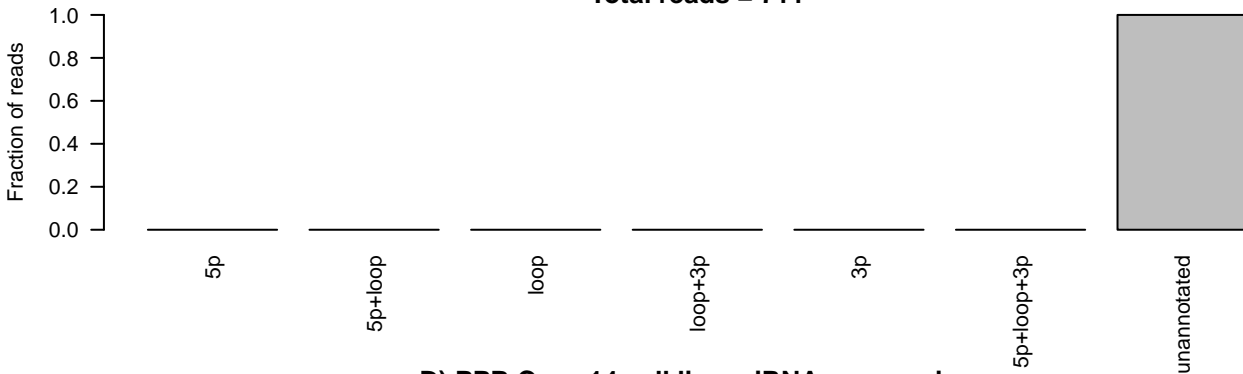

**D) PPB Case 14 cell line miRNA sequencing**  
ID=MI0005565\_1;accession\_number=MI0005565;Name=hsa-mir-543  
Total reads = 69

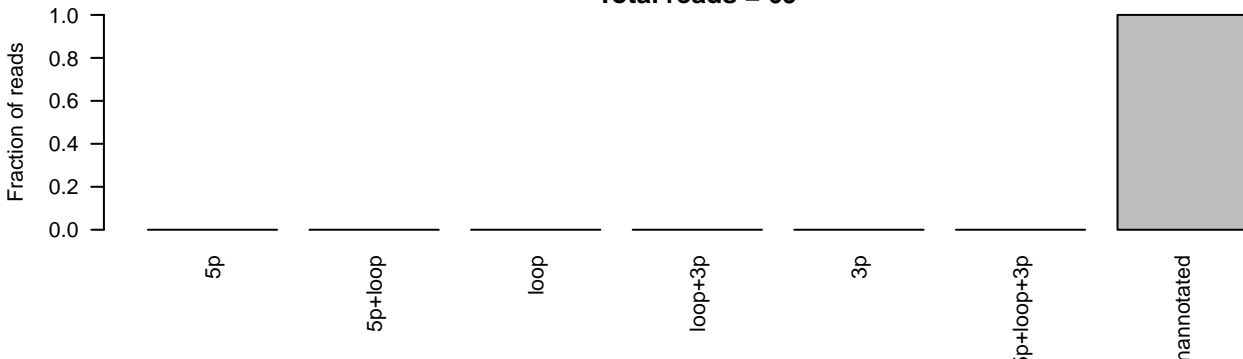

**B) Normal fibroblast miRNA sequencing**  
ID=MI0000446\_1;accession\_number=MI0000446;Name=hsa-mir-125b-1  
Total reads = 96

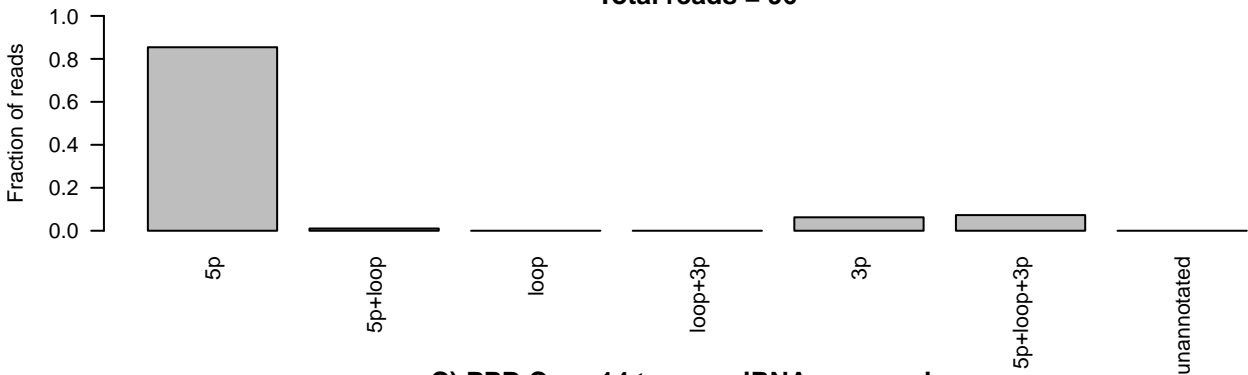

**C) PPB Case 14 tumor miRNA sequencing**  
ID=MI0000446\_1;accession\_number=MI0000446;Name=hsa-mir-125b-1  
Total reads = 11

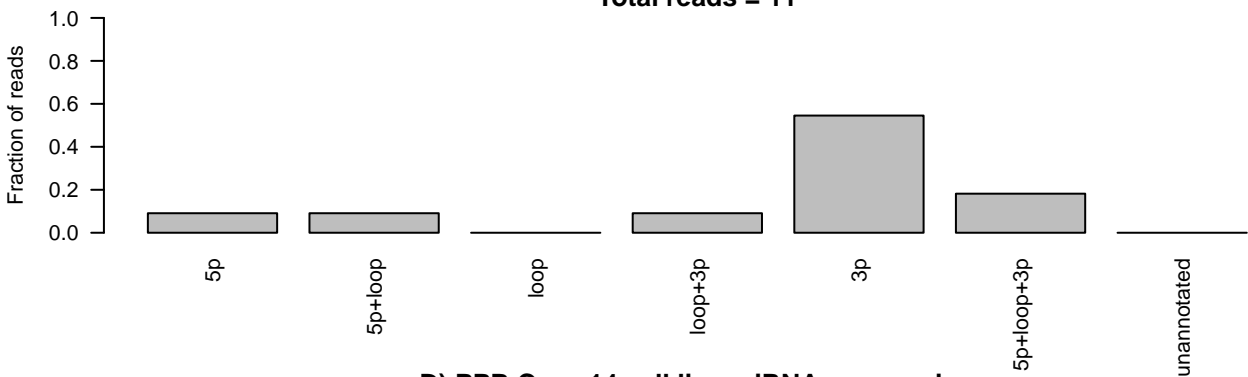

**D) PPB Case 14 cell line miRNA sequencing**  
ID=MI0000446\_1;accession\_number=MI0000446;Name=hsa-mir-125b-1  
Total reads = 51

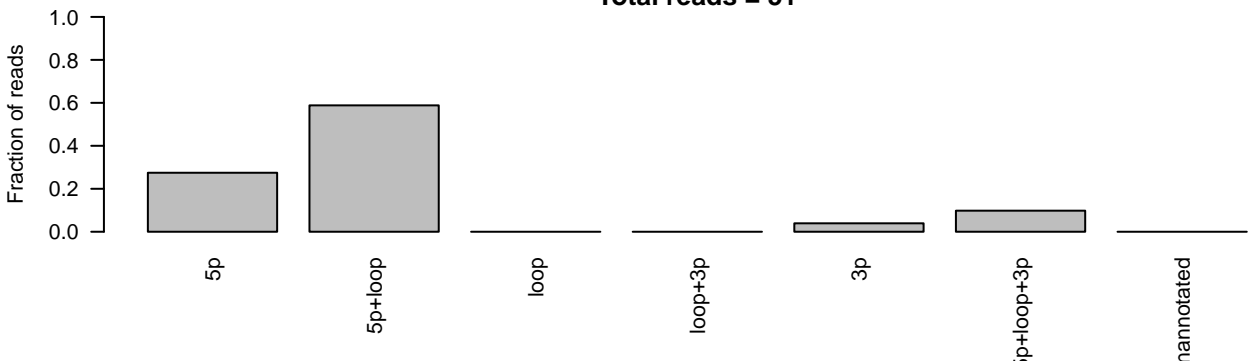

**B) Normal fibroblast miRNA sequencing**  
ID=MI0000081\_1;accession\_number=MI0000081;Name=hsa-mir-24-2  
Total reads = 91

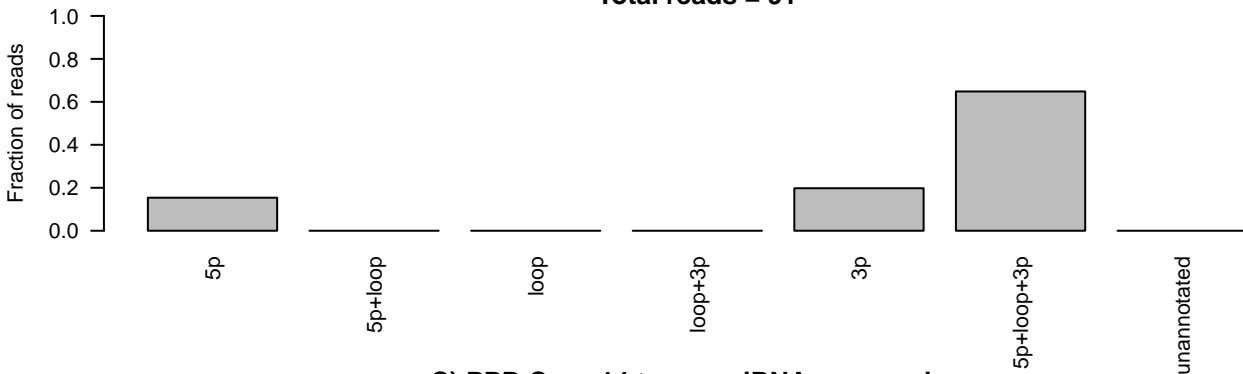

**C) PPB Case 14 tumor miRNA sequencing**  
ID=MI0000081\_1;accession\_number=MI0000081;Name=hsa-mir-24-2  
Total reads = 213

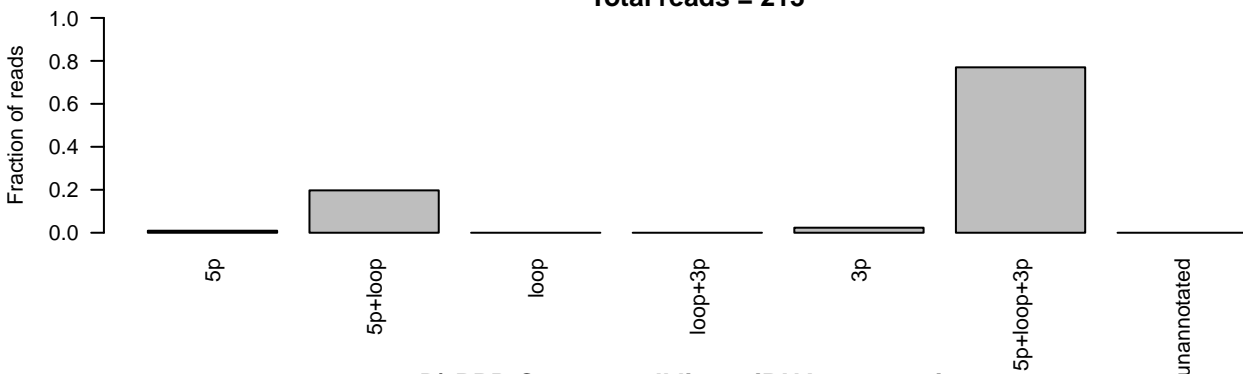

**D) PPB Case 14 cell line miRNA sequencing**  
ID=MI0000081\_1;accession\_number=MI0000081;Name=hsa-mir-24-2  
Total reads = 25

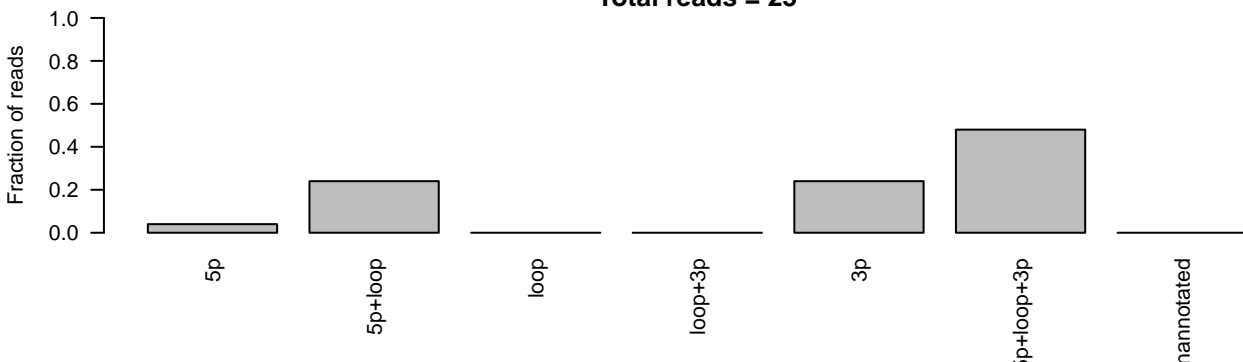

**B) Normal fibroblast miRNA sequencing**  
ID=MI0006444\_1;accession\_number=MI0006444;Name=hsa-mir-1307  
Total reads = 93

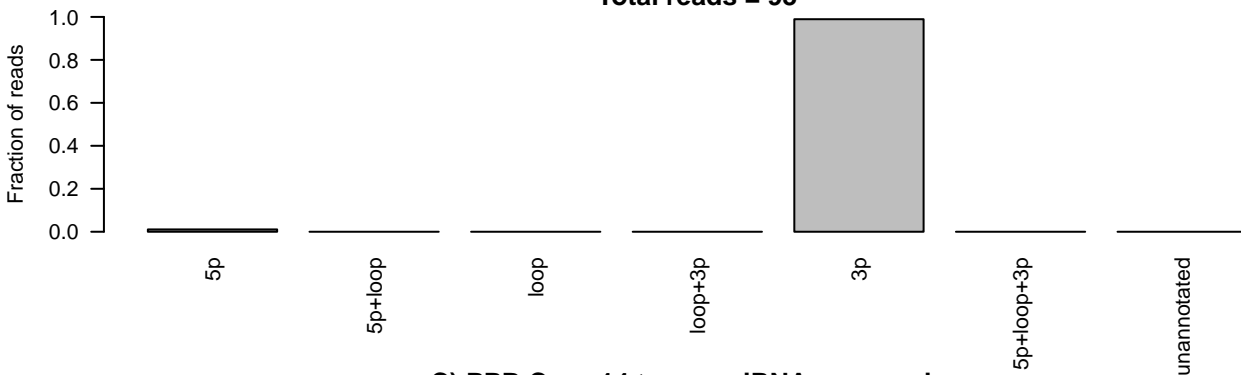

**C) PPB Case 14 tumor miRNA sequencing**  
ID=MI0006444\_1;accession\_number=MI0006444;Name=hsa-mir-1307  
Total reads = 16

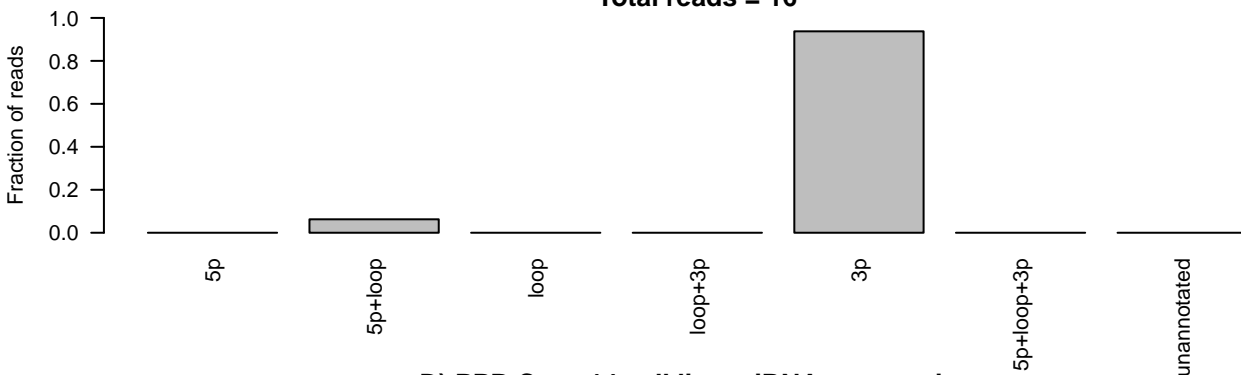

**D) PPB Case 14 cell line miRNA sequencing**  
ID=MI0006444\_1;accession\_number=MI0006444;Name=hsa-mir-1307  
Total reads = 11

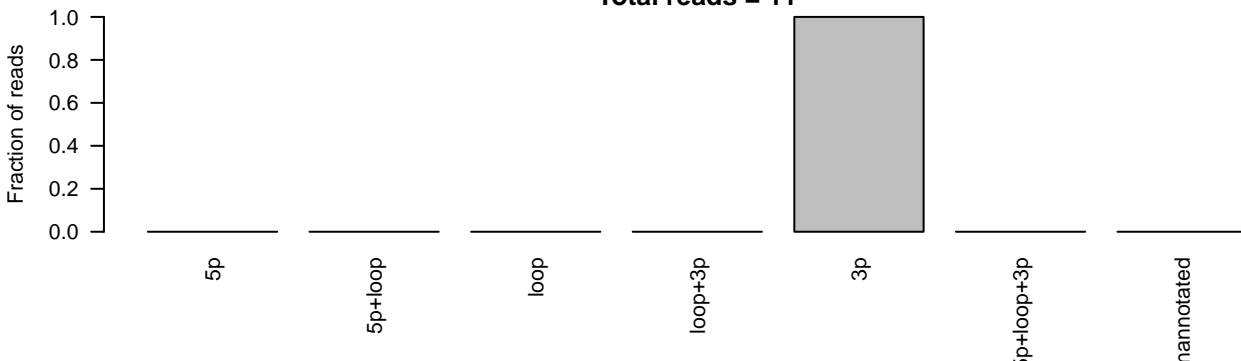

**B) Normal fibroblast miRNA sequencing**  
ID=MI0000095\_1;accession\_number=MI0000095;Name=hsa-mir-93  
Total reads = 86

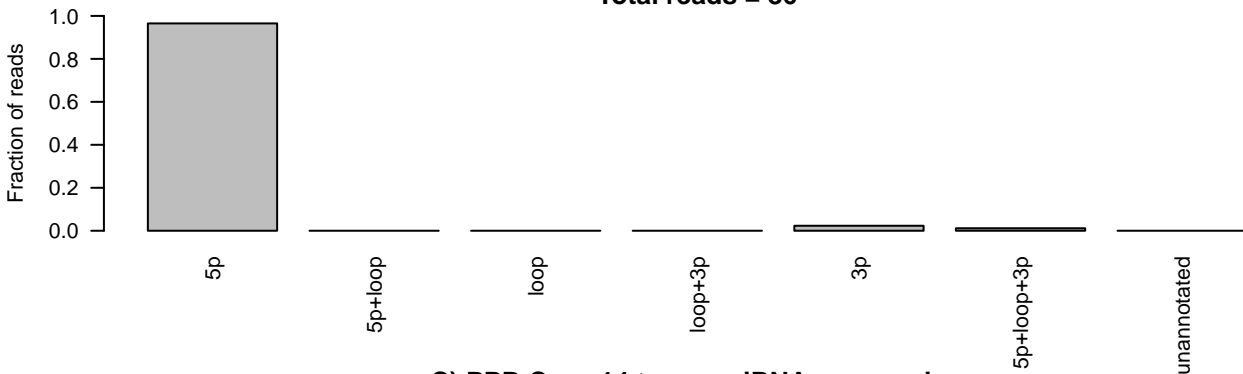

**C) PPB Case 14 tumor miRNA sequencing**  
ID=MI0000095\_1;accession\_number=MI0000095;Name=hsa-mir-93  
Total reads = 17

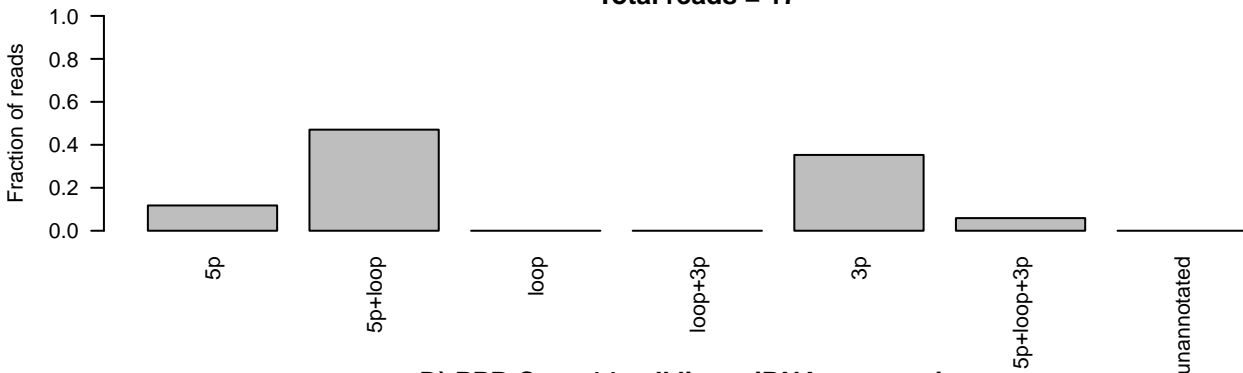

**D) PPB Case 14 cell line miRNA sequencing**  
ID=MI0000095\_1;accession\_number=MI0000095;Name=hsa-mir-93  
Total reads = 1

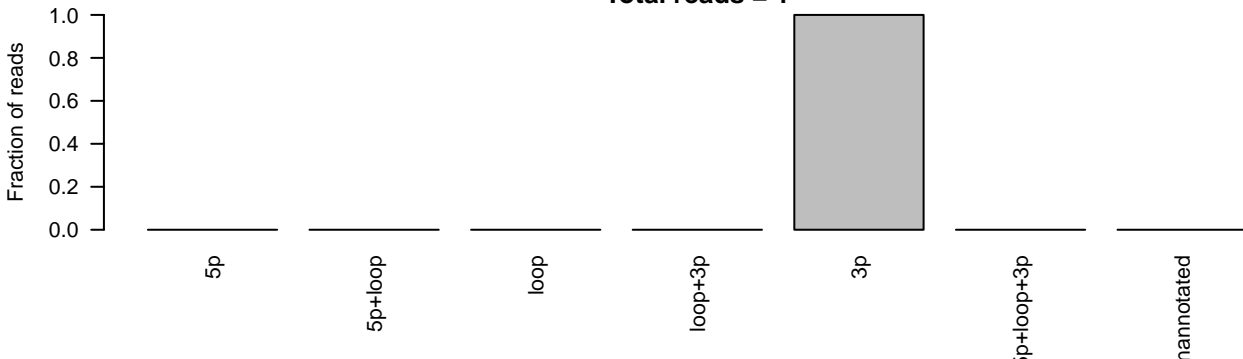

**B) Normal fibroblast miRNA sequencing**  
ID=MI0000434\_1;accession\_number=MI0000434;Name=hsa-let-7i  
Total reads = 90

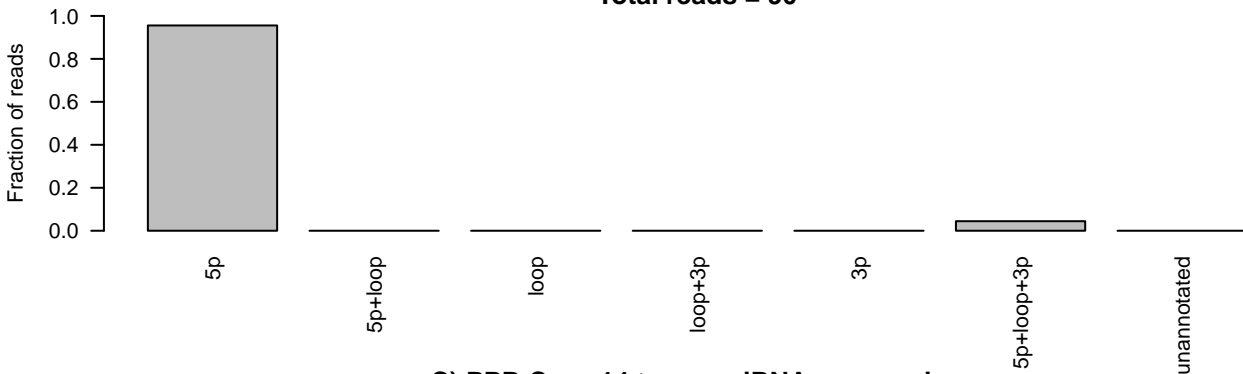

**C) PPB Case 14 tumor miRNA sequencing**  
ID=MI0000434\_1;accession\_number=MI0000434;Name=hsa-let-7i  
Total reads = 8

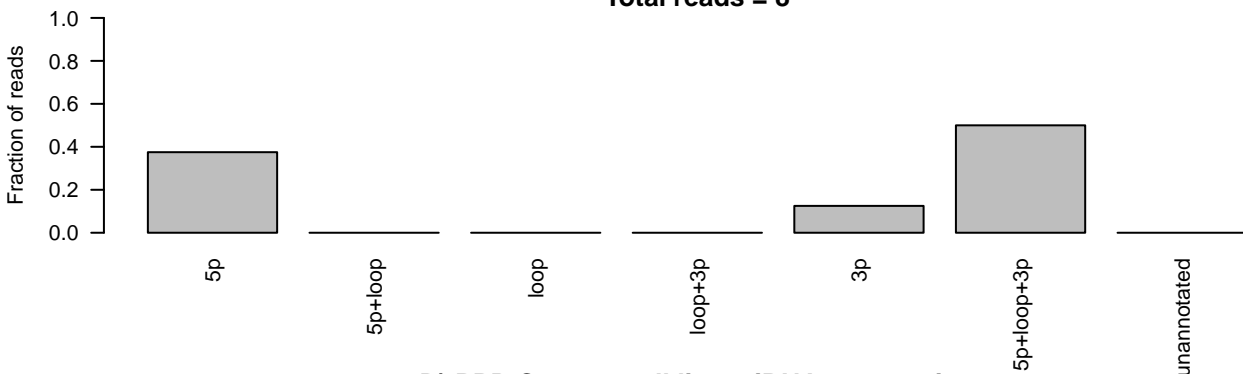

**D) PPB Case 14 cell line miRNA sequencing**  
ID=MI0000434\_1;accession\_number=MI0000434;Name=hsa-let-7i  
Total reads = 1

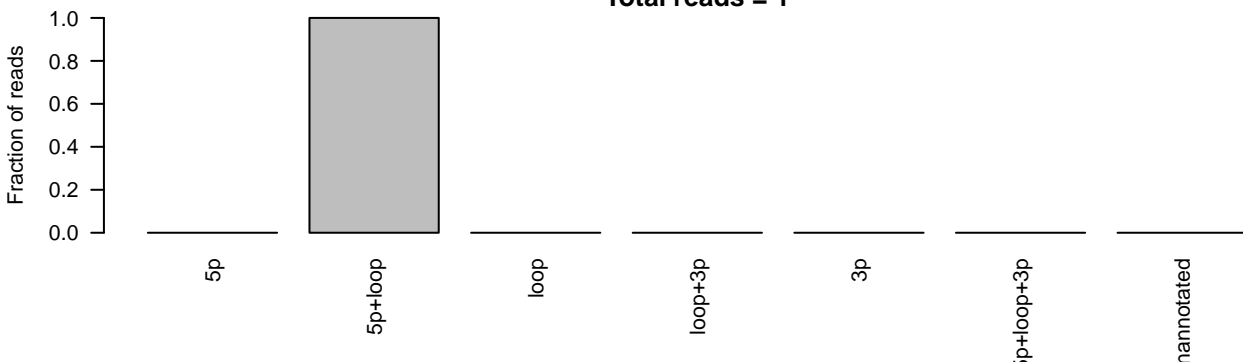



**B) Normal fibroblast miRNA sequencing**  
ID=MI0003820\_1;accession\_number=MI0003820;Name=hsa-mir-454  
Total reads = 88

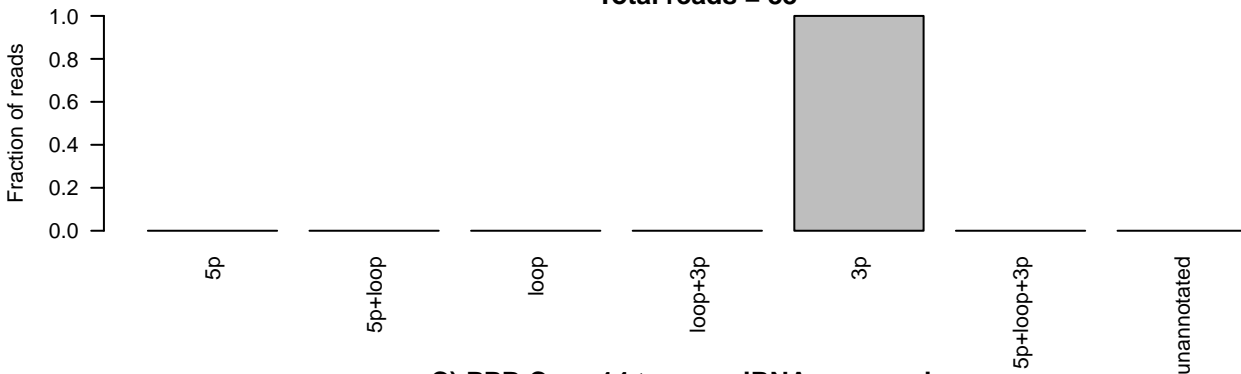

**C) PPB Case 14 tumor miRNA sequencing**  
ID=MI0003820\_1;accession\_number=MI0003820;Name=hsa-mir-454  
Total reads = 197

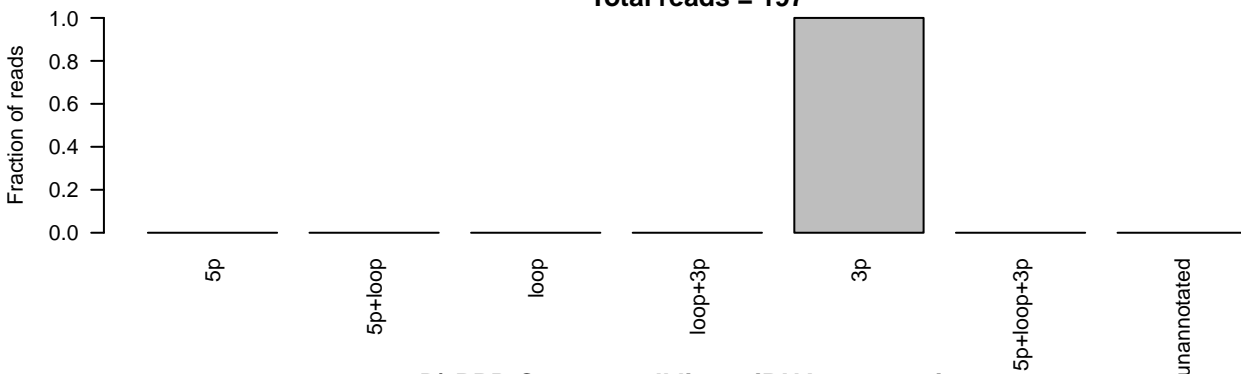

**D) PPB Case 14 cell line miRNA sequencing**  
ID=MI0003820\_1;accession\_number=MI0003820;Name=hsa-mir-454  
Total reads = 15

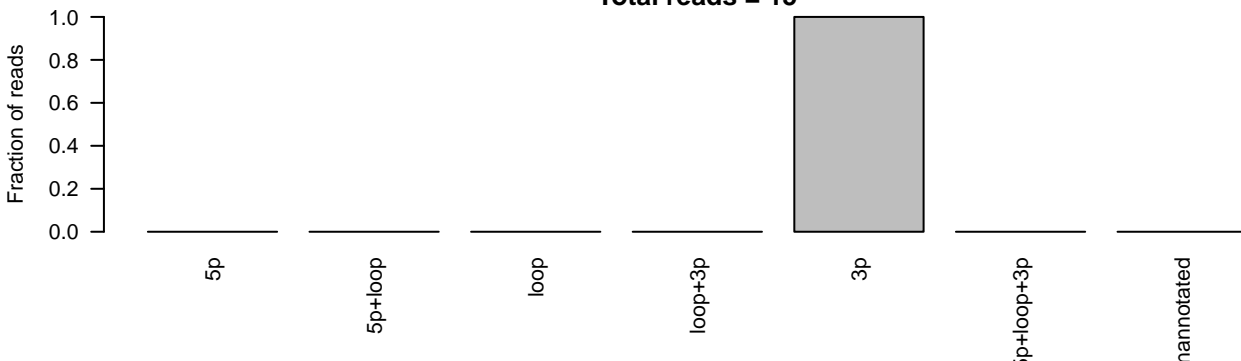

**B) Normal fibroblast miRNA sequencing**  
ID=MI0001445\_1;accession\_number=MI0001445;Name=hsa-mir-423  
Total reads = 87

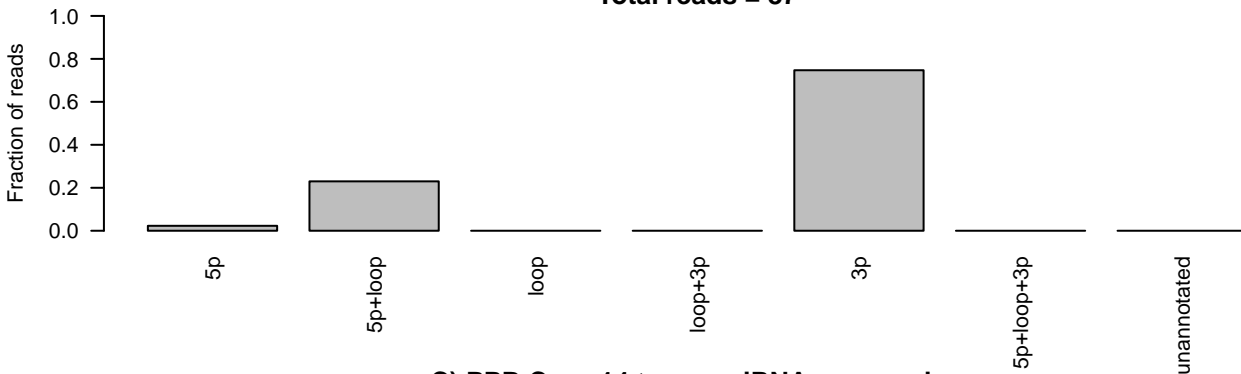

**C) PPB Case 14 tumor miRNA sequencing**  
ID=MI0001445\_1;accession\_number=MI0001445;Name=hsa-mir-423  
Total reads = 39

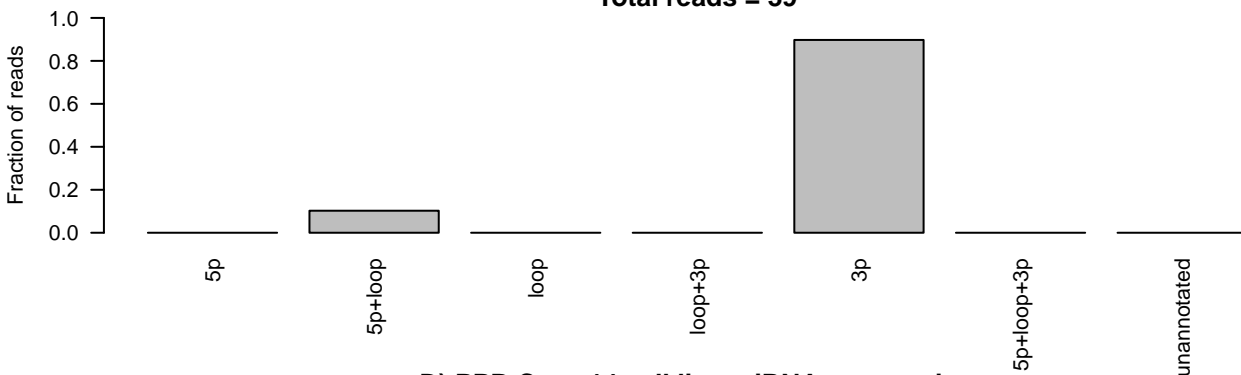

**D) PPB Case 14 cell line miRNA sequencing**  
ID=MI0001445\_1;accession\_number=MI0001445;Name=hsa-mir-423  
Total reads = 30

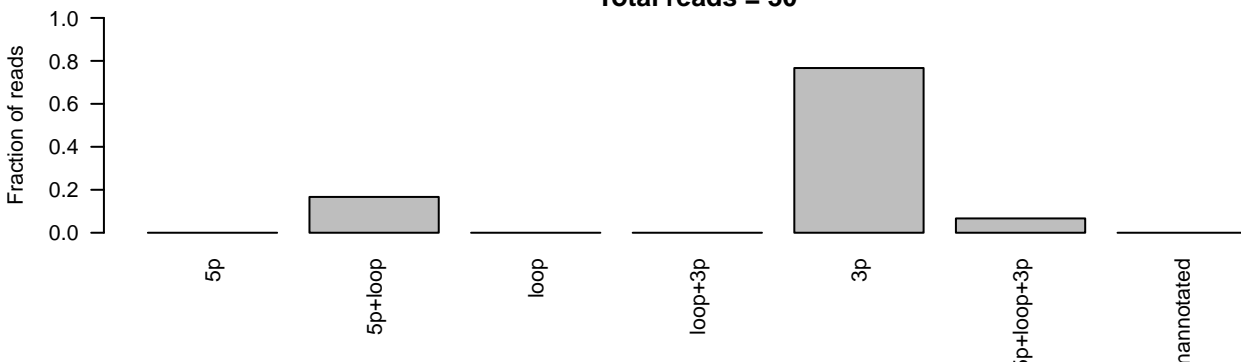

**B) Normal fibroblast miRNA sequencing**  
ID=MI0014226\_1;accession\_number=MI0014226;Name=hsa-mir-3184  
Total reads = 86

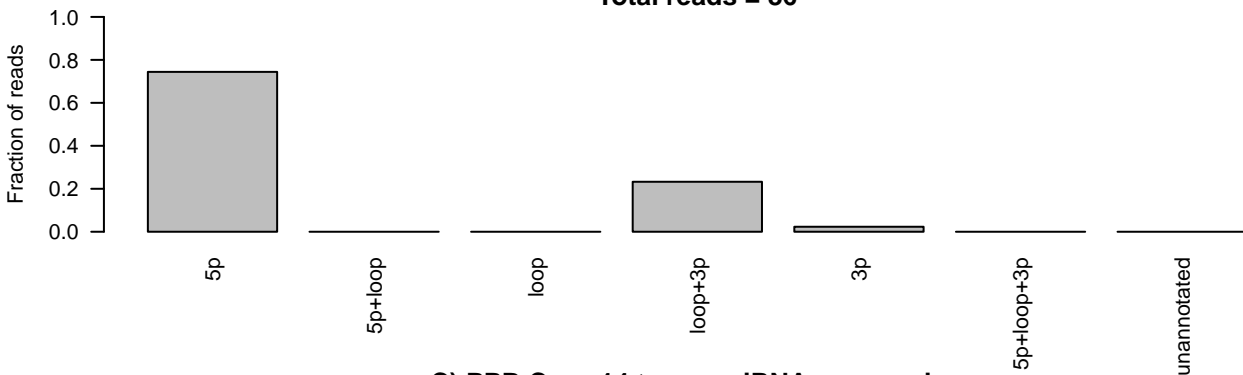

**C) PPB Case 14 tumor miRNA sequencing**  
ID=MI0014226\_1;accession\_number=MI0014226;Name=hsa-mir-3184  
Total reads = 39

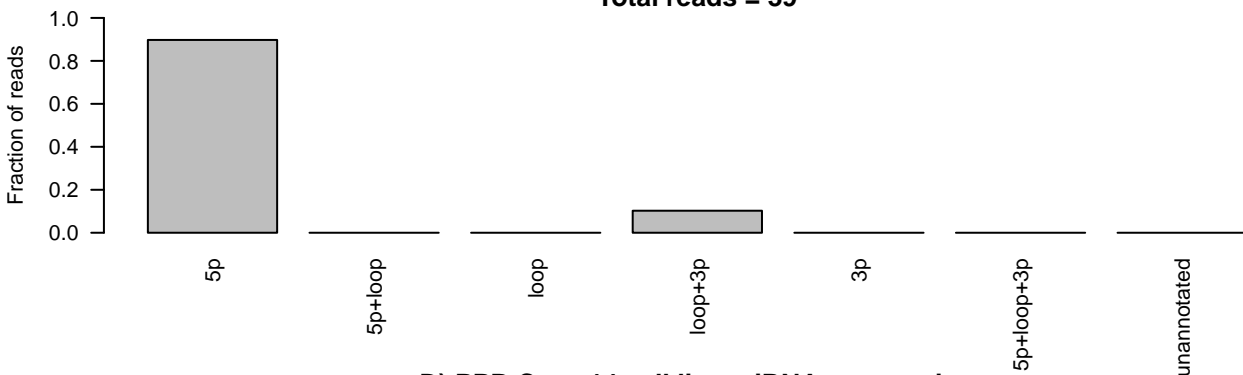

**D) PPB Case 14 cell line miRNA sequencing**  
ID=MI0014226\_1;accession\_number=MI0014226;Name=hsa-mir-3184  
Total reads = 28

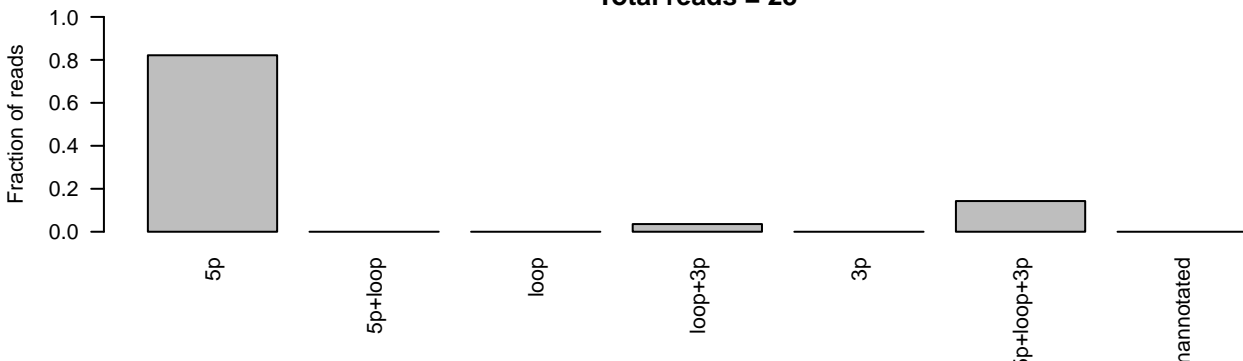

**B) Normal fibroblast miRNA sequencing**  
ID=MI0000065\_1;accession\_number=MI0000065;Name=hsa-let-7d  
Total reads = 87

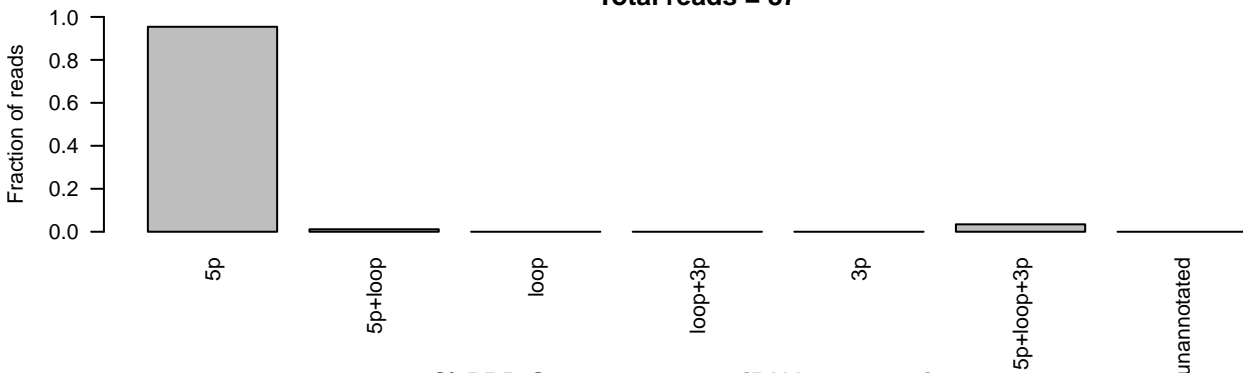

**C) PPB Case 14 tumor miRNA sequencing**  
ID=MI0000065\_1;accession\_number=MI0000065;Name=hsa-let-7d  
Total reads = 15

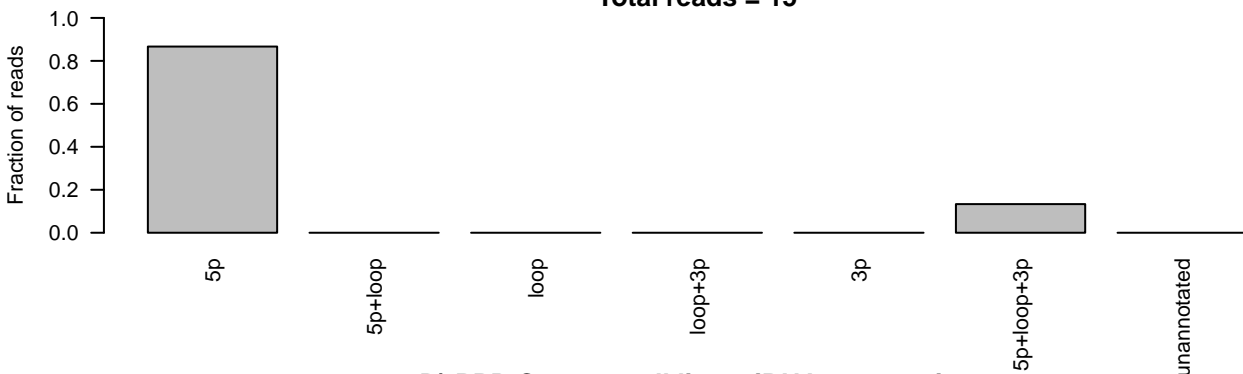

**D) PPB Case 14 cell line miRNA sequencing**  
ID=MI0000065\_1;accession\_number=MI0000065;Name=hsa-let-7d  
Total reads = 2

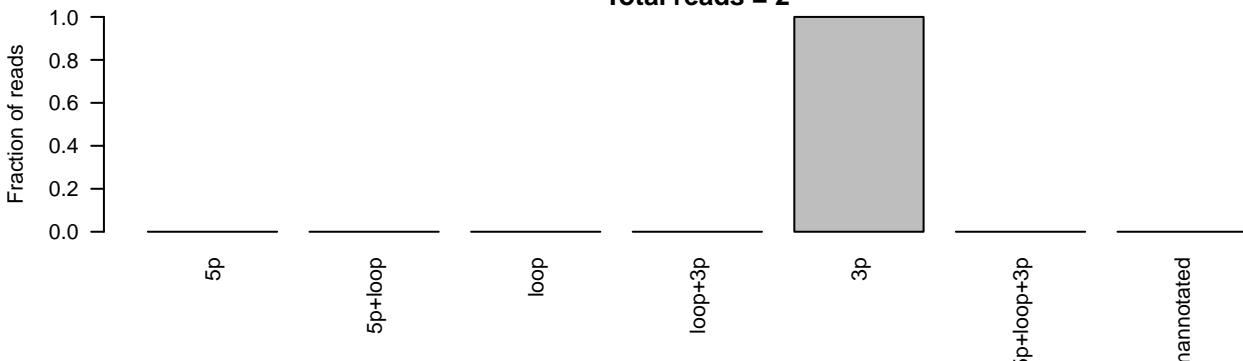

**B) Normal fibroblast miRNA sequencing**  
ID=MI0000087\_1;accession\_number=MI0000087;Name=hsa-mir-29a  
Total reads = 85

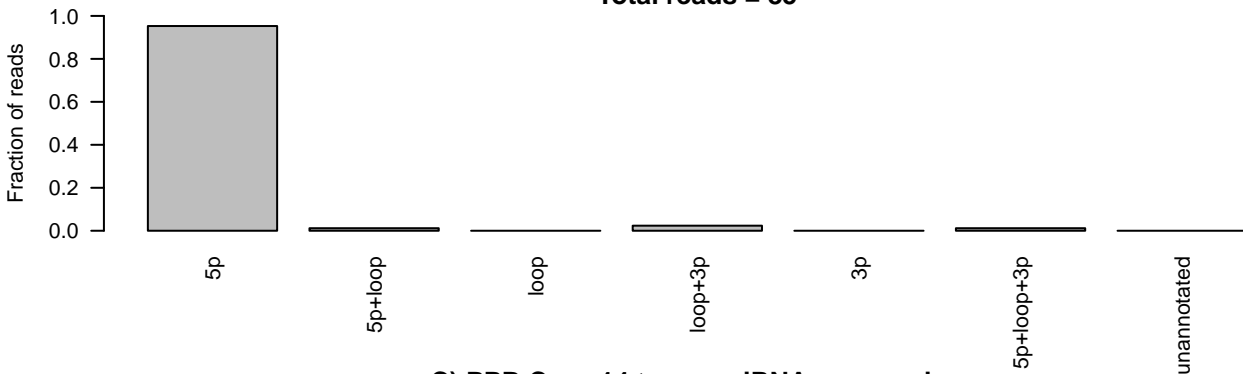

**C) PPB Case 14 tumor miRNA sequencing**  
ID=MI0000087\_1;accession\_number=MI0000087;Name=hsa-mir-29a  
Total reads = 3

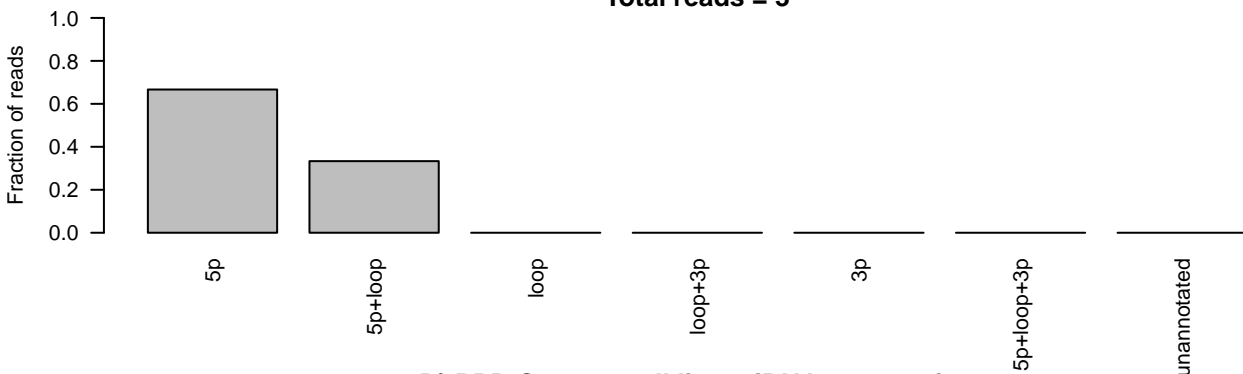

**D) PPB Case 14 cell line miRNA sequencing**  
ID=MI0000087\_1;accession\_number=MI0000087;Name=hsa-mir-29a  
Total reads = 1



**B) Normal fibroblast miRNA sequencing**  
ID=MI0000075\_1;accession\_number=MI0000075;Name=hsa-mir-19b-2  
Total reads = 83

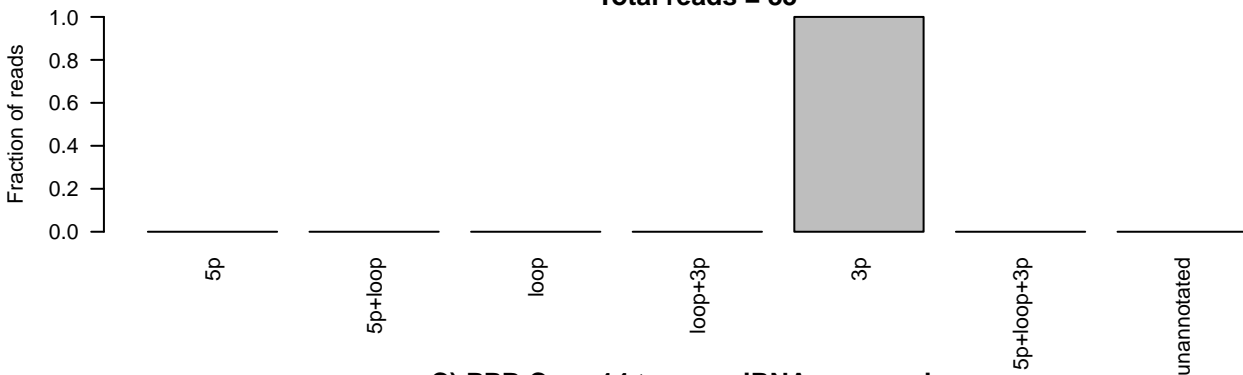

**C) PPB Case 14 tumor miRNA sequencing**  
ID=MI0000075\_1;accession\_number=MI0000075;Name=hsa-mir-19b-2  
Total reads = 327

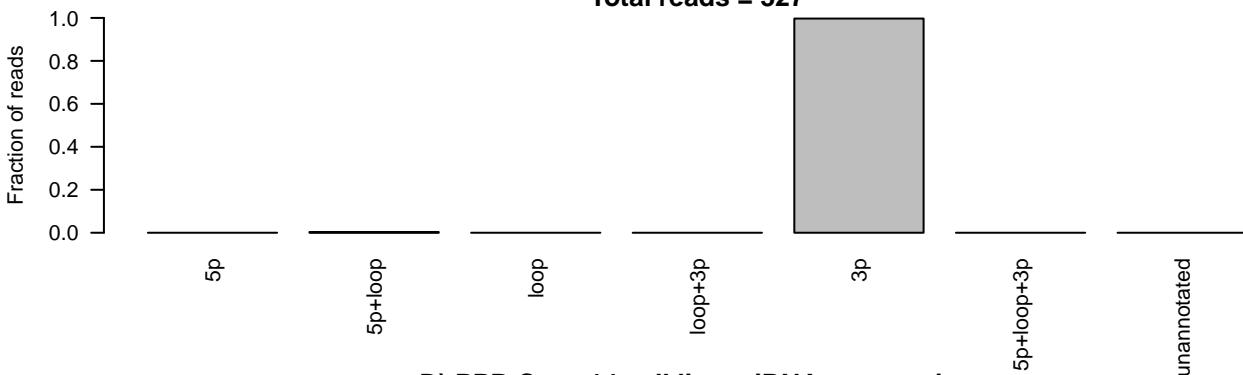

**D) PPB Case 14 cell line miRNA sequencing**  
ID=MI0000075\_1;accession\_number=MI0000075;Name=hsa-mir-19b-2  
Total reads = 15

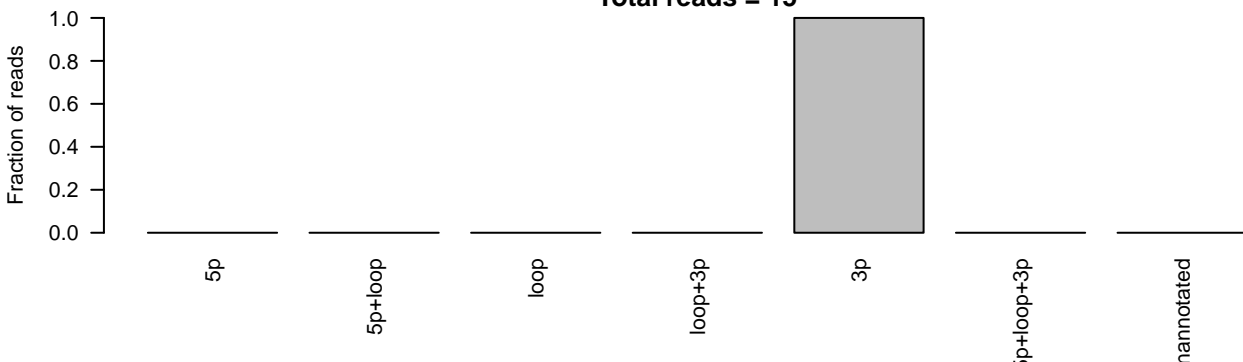

**B) Normal fibroblast miRNA sequencing**  
ID=MI0000242\_1;accession\_number=MI0000242;Name=hsa-mir-199a-1  
Total reads = 81

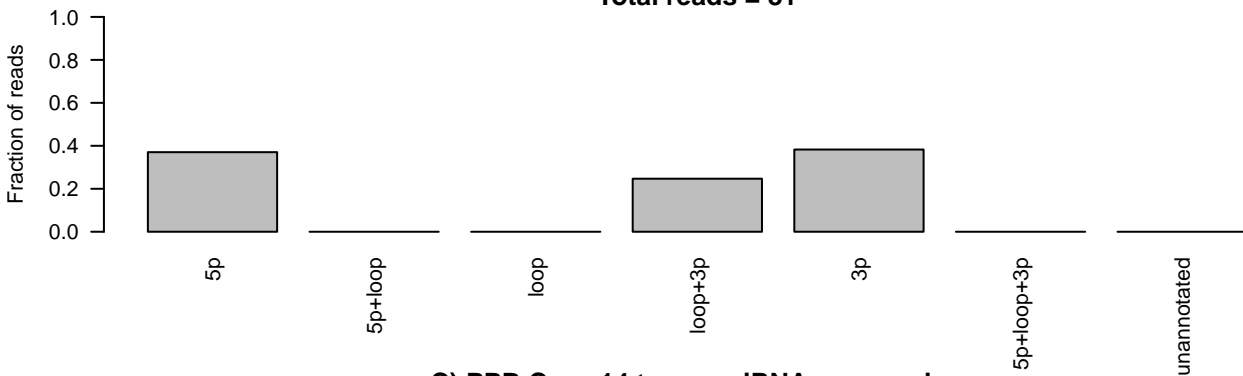

**C) PPB Case 14 tumor miRNA sequencing**  
ID=MI0000242\_1;accession\_number=MI0000242;Name=hsa-mir-199a-1  
Total reads = 280

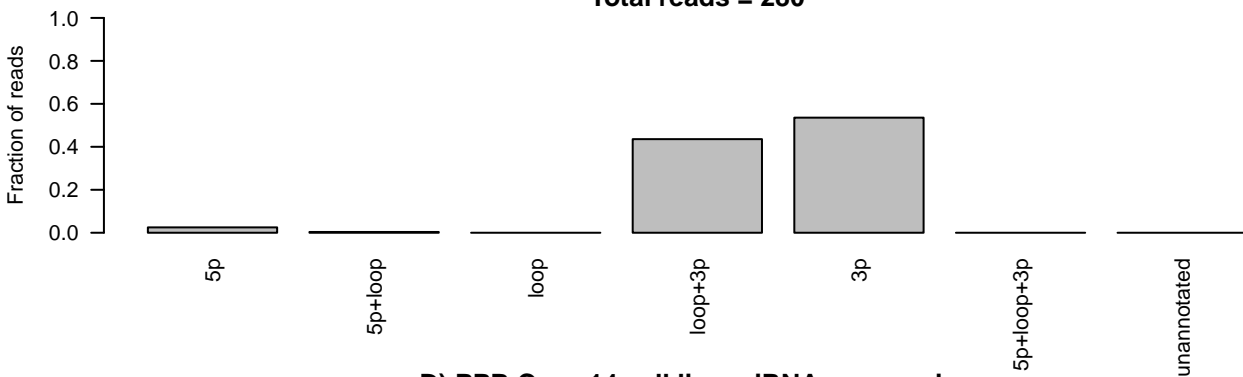

**D) PPB Case 14 cell line miRNA sequencing**  
ID=MI0000242\_1;accession\_number=MI0000242;Name=hsa-mir-199a-1  
Total reads = 17

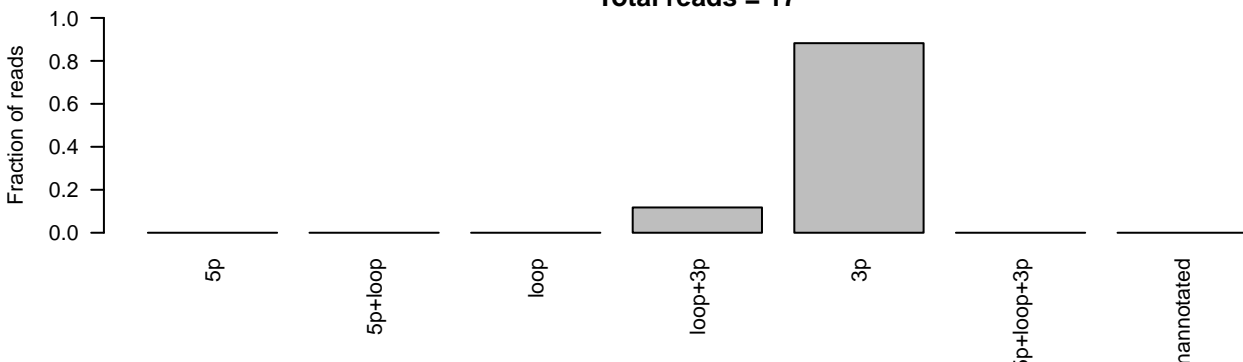

**B) Normal fibroblast miRNA sequencing**  
ID=MI0003188\_1;accession\_number=MI0003188;Name=hsa-mir-503  
Total reads = 77

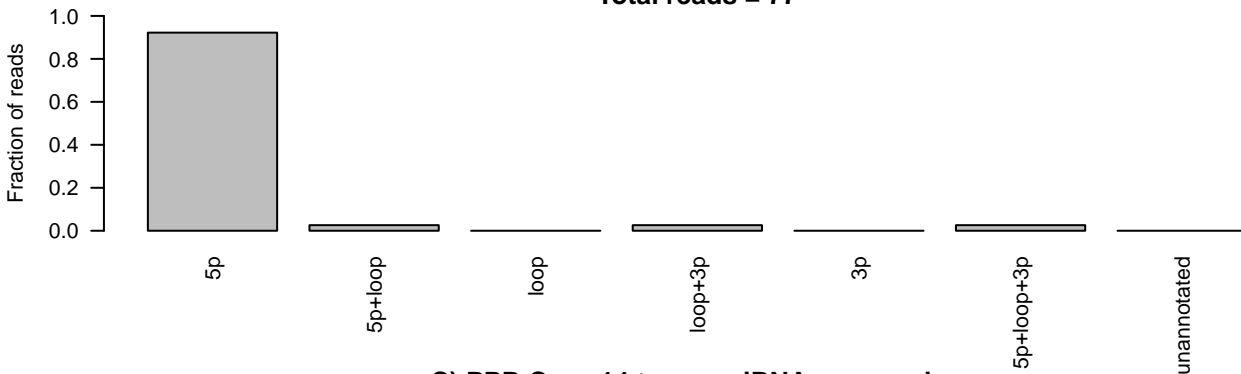

**C) PPB Case 14 tumor miRNA sequencing**  
ID=MI0003188\_1;accession\_number=MI0003188;Name=hsa-mir-503  
Total reads = 42

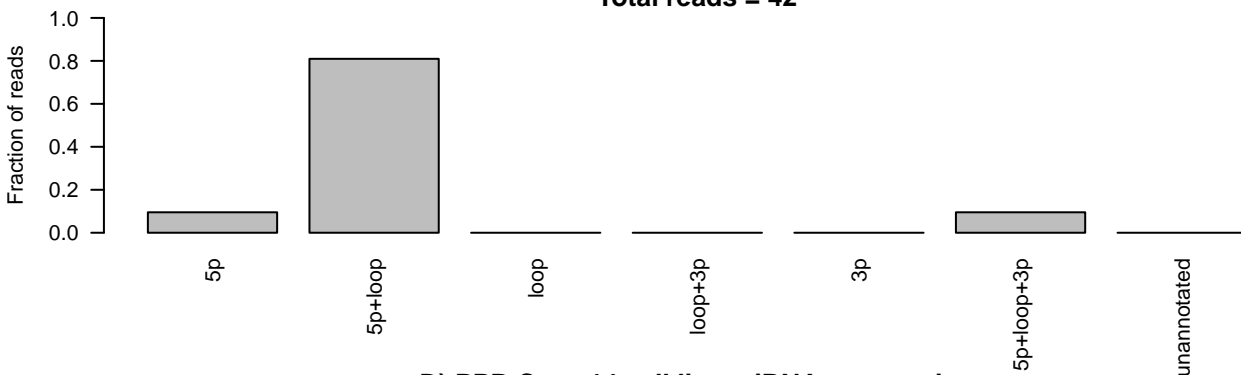

**D) PPB Case 14 cell line miRNA sequencing**  
ID=MI0003188\_1;accession\_number=MI0003188;Name=hsa-mir-503  
Total reads = 37

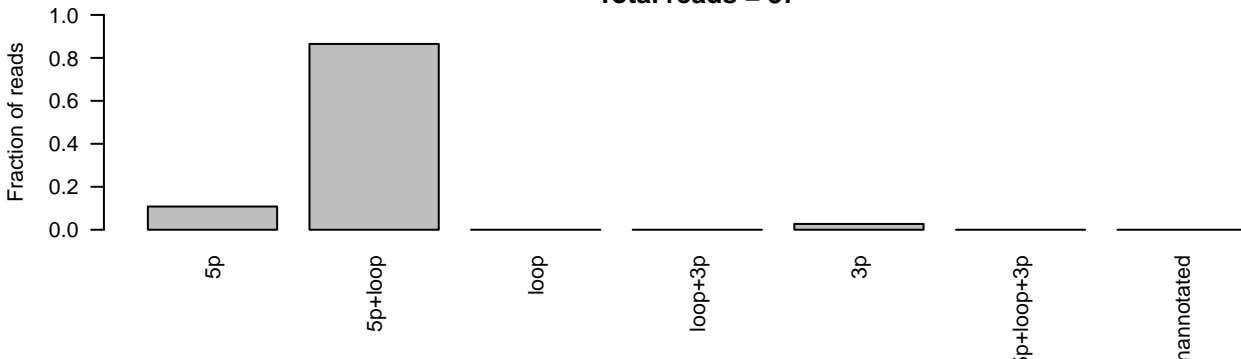



**B) Normal fibroblast miRNA sequencing**  
ID=MI0000100\_1;accession\_number=MI0000100;Name=hsa-mir-98  
Total reads = 72

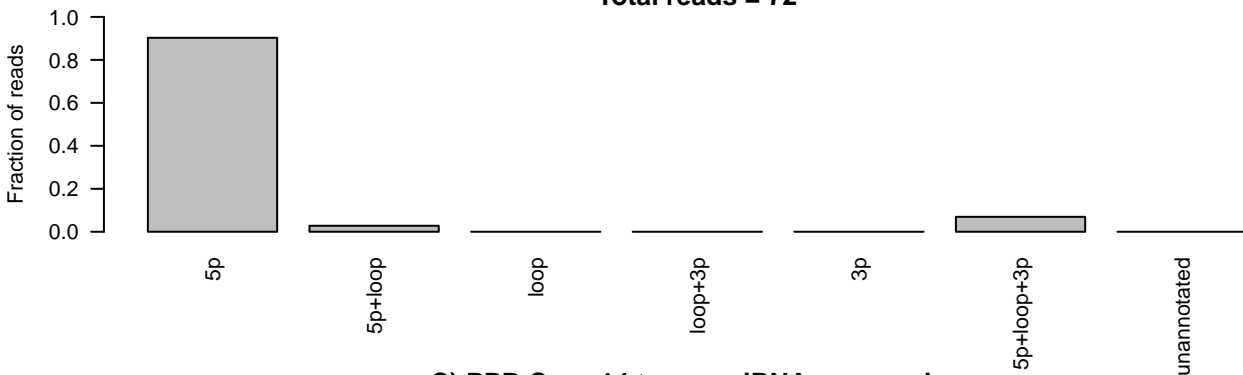

**C) PPB Case 14 tumor miRNA sequencing**  
ID=MI0000100\_1;accession\_number=MI0000100;Name=hsa-mir-98  
Total reads = 9

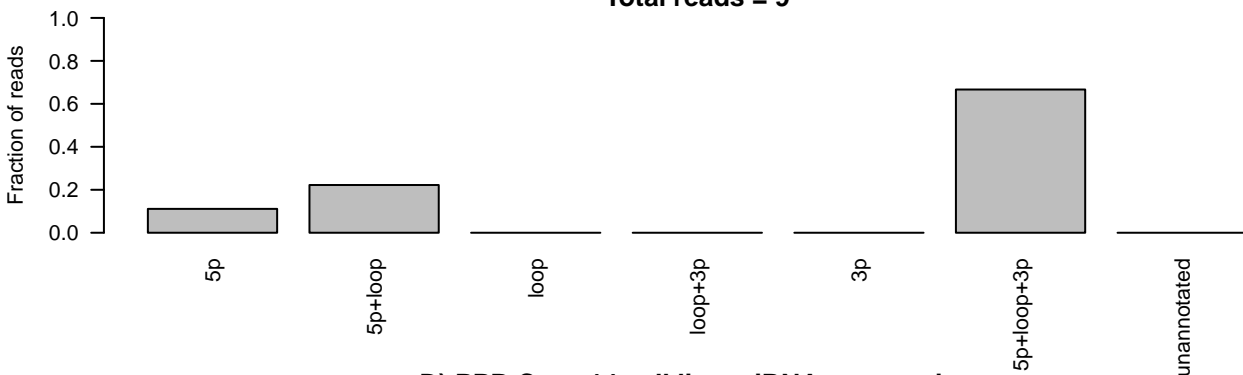

**D) PPB Case 14 cell line miRNA sequencing**  
ID=MI0000100\_1;accession\_number=MI0000100;Name=hsa-mir-98  
Total reads = 2

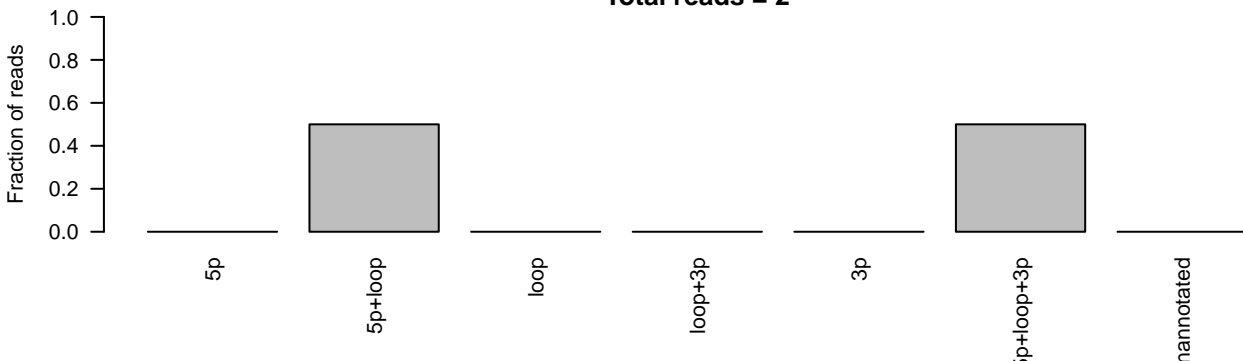

**B) Normal fibroblast miRNA sequencing**  
ID=MI0003190\_1;accession\_number=MI0003190;Name=hsa-mir-505  
Total reads = 68

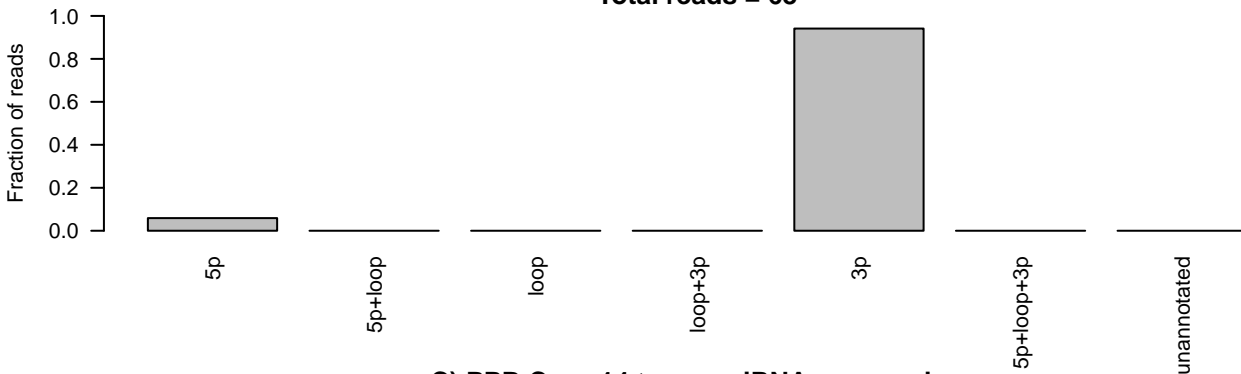

**C) PPB Case 14 tumor miRNA sequencing**  
ID=MI0003190\_1;accession\_number=MI0003190;Name=hsa-mir-505  
Total reads = 7

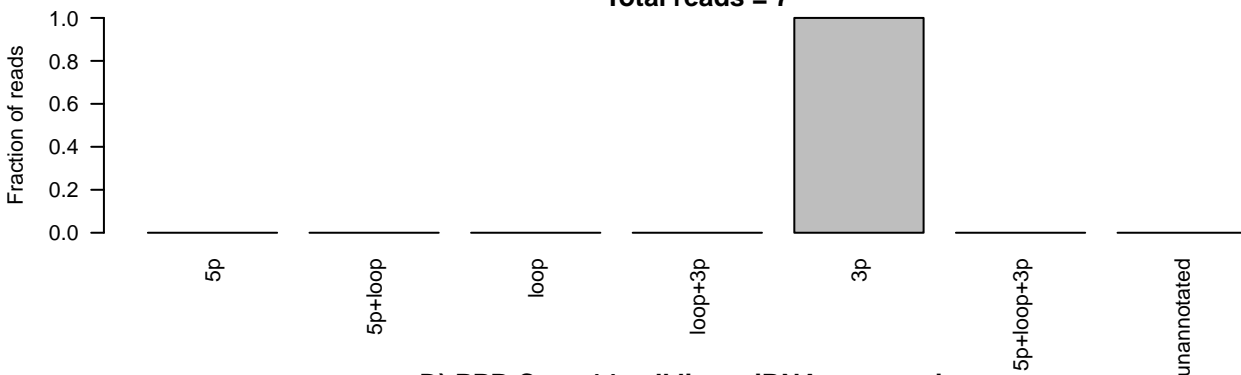

**D) PPB Case 14 cell line miRNA sequencing**  
ID=MI0003190\_1;accession\_number=MI0003190;Name=hsa-mir-505  
Total reads = 0



**B) Normal fibroblast miRNA sequencing**  
ID=MI0002471\_1;accession\_number=MI0002471;Name=hsa-mir-487a  
Total reads = 63

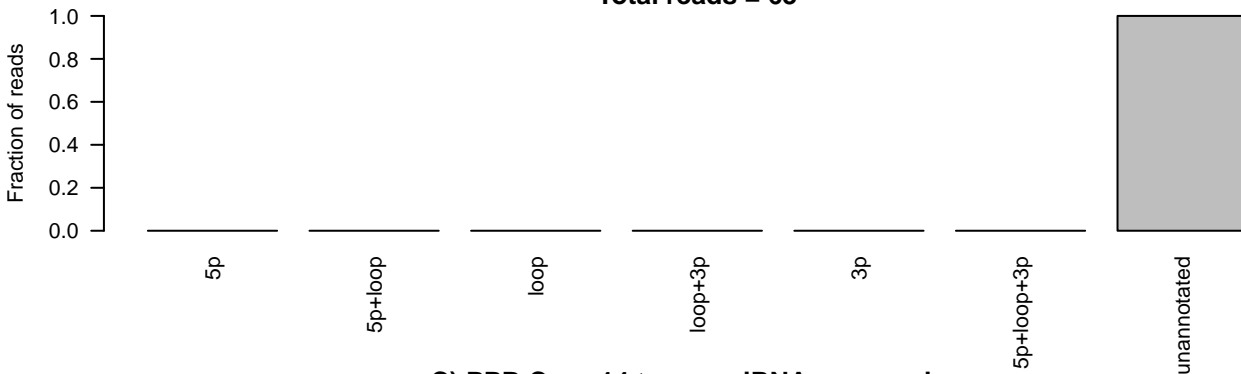

**C) PPB Case 14 tumor miRNA sequencing**  
ID=MI0002471\_1;accession\_number=MI0002471;Name=hsa-mir-487a  
Total reads = 1260

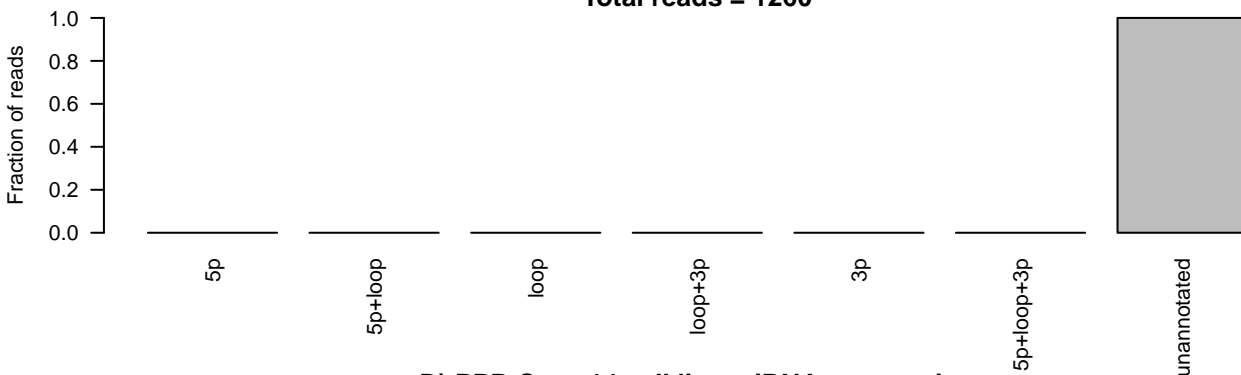

**D) PPB Case 14 cell line miRNA sequencing**  
ID=MI0002471\_1;accession\_number=MI0002471;Name=hsa-mir-487a  
Total reads = 108

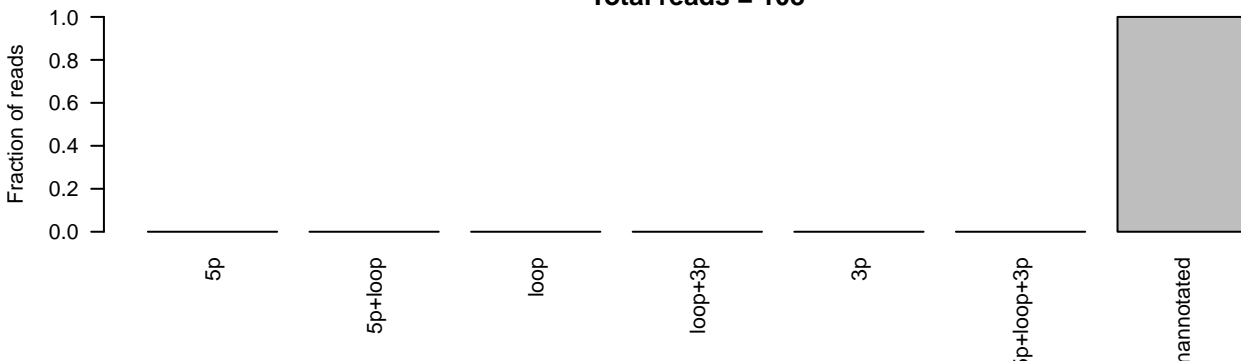

**B) Normal fibroblast miRNA sequencing**  
ID=MI0000433\_1;accession\_number=MI0000433;Name=hsa-let-7g  
Total reads = 63

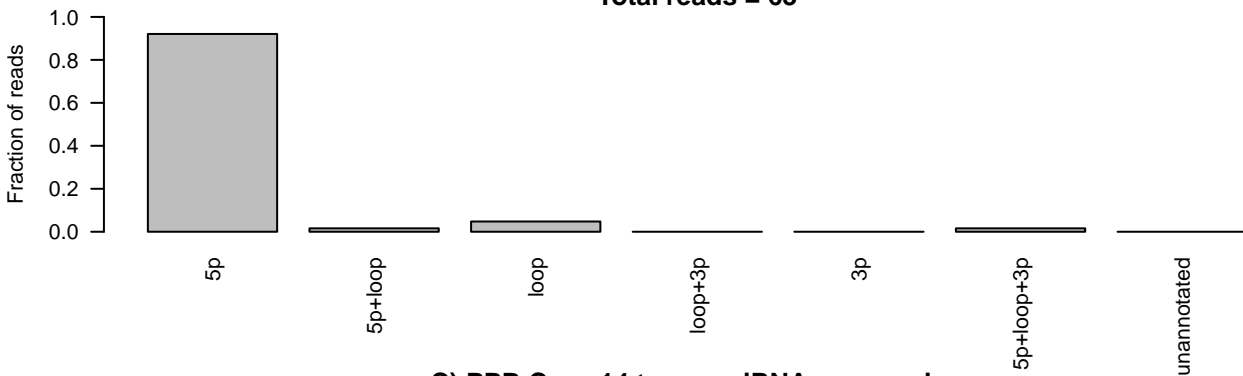

**C) PPB Case 14 tumor miRNA sequencing**  
ID=MI0000433\_1;accession\_number=MI0000433;Name=hsa-let-7g  
Total reads = 20

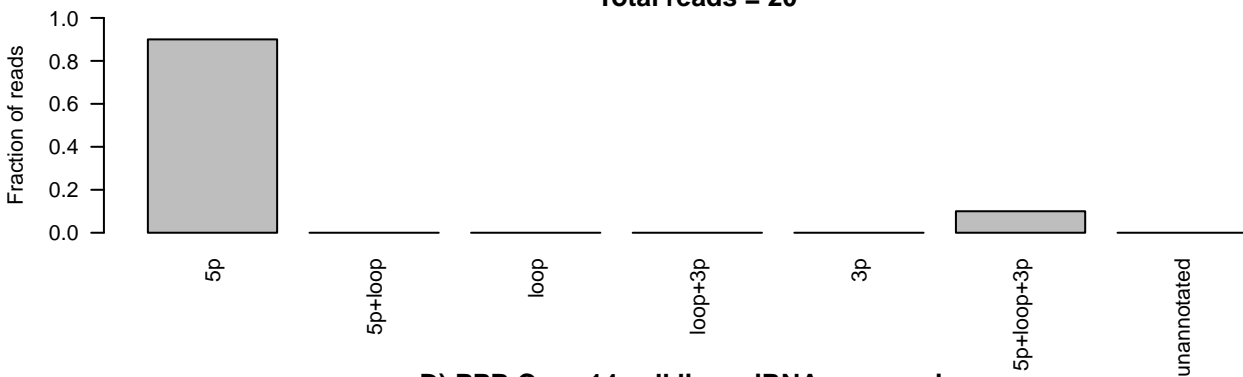

**D) PPB Case 14 cell line miRNA sequencing**  
ID=MI0000433\_1;accession\_number=MI0000433;Name=hsa-let-7g  
Total reads = 5

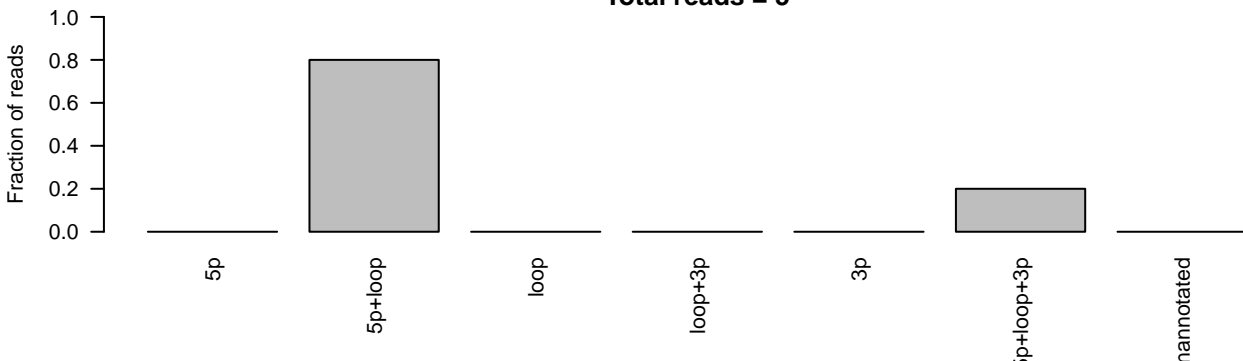

**B) Normal fibroblast miRNA sequencing**  
ID=MI0000439\_1;accession\_number=MI0000439;Name=hsa-mir-23b  
Total reads = 60

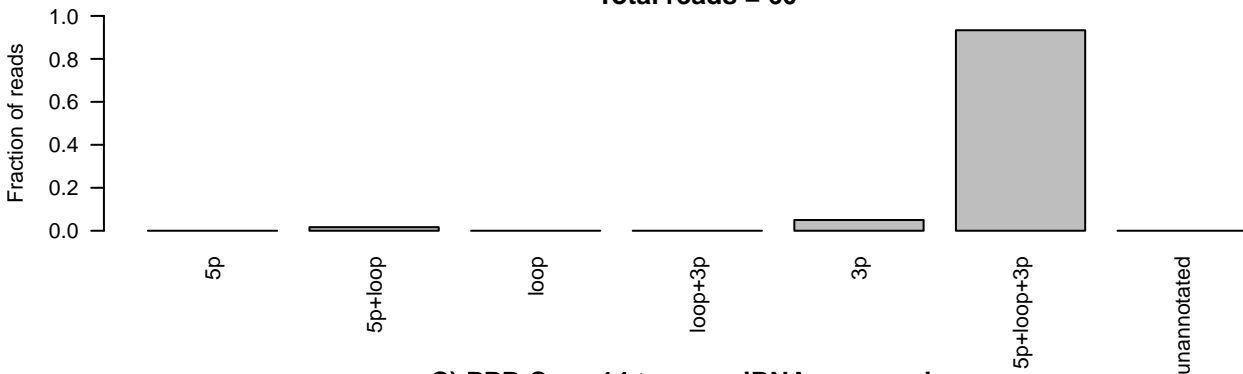

**C) PPB Case 14 tumor miRNA sequencing**  
ID=MI0000439\_1;accession\_number=MI0000439;Name=hsa-mir-23b  
Total reads = 65

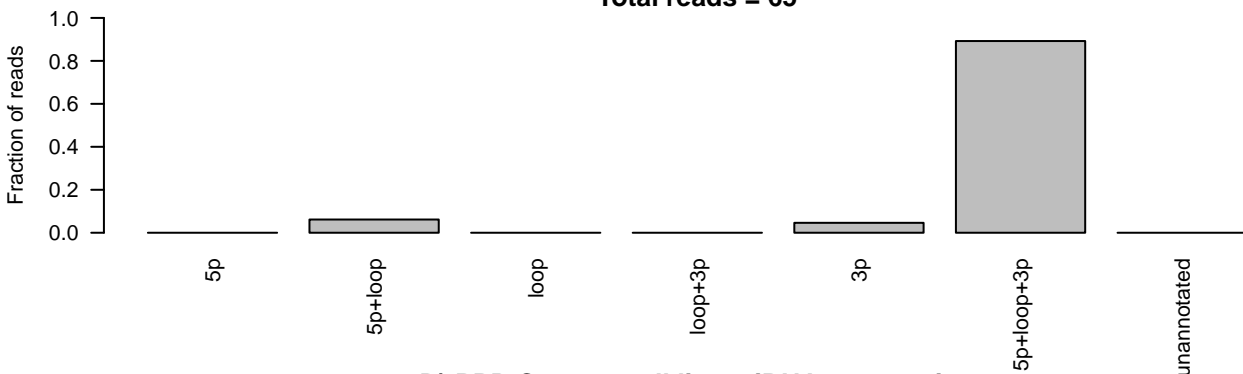

**D) PPB Case 14 cell line miRNA sequencing**  
ID=MI0000439\_1;accession\_number=MI0000439;Name=hsa-mir-23b  
Total reads = 21

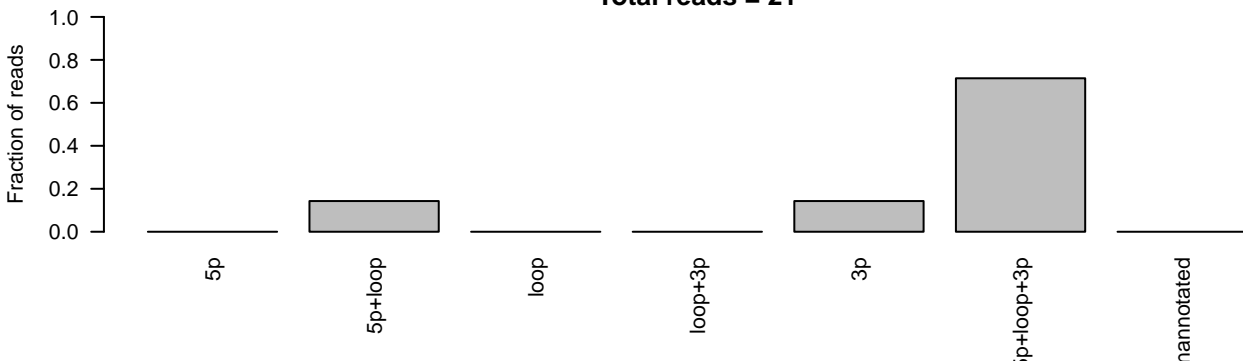

**B) Normal fibroblast miRNA sequencing**  
ID=MI0014181\_1;accession\_number=MI0014181;Name=hsa-mir-3074  
Total reads = 59

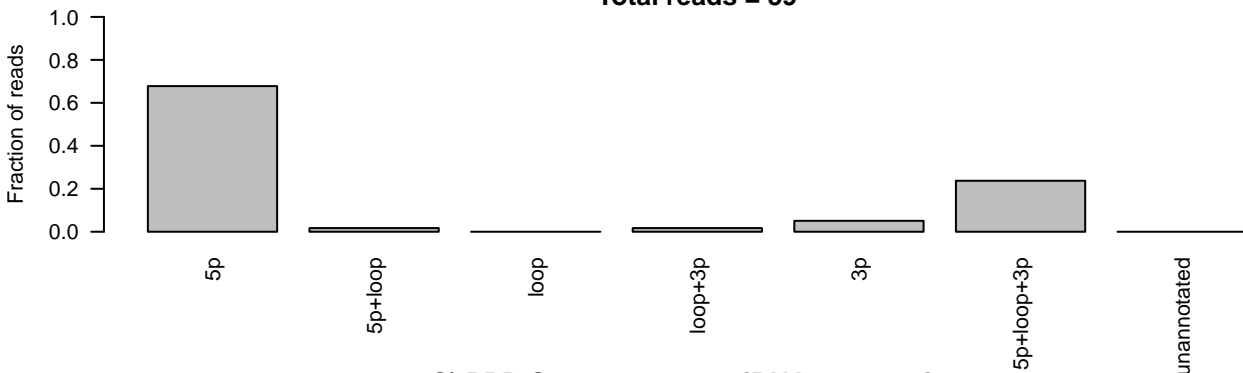

**C) PPB Case 14 tumor miRNA sequencing**  
ID=MI0014181\_1;accession\_number=MI0014181;Name=hsa-mir-3074  
Total reads = 85

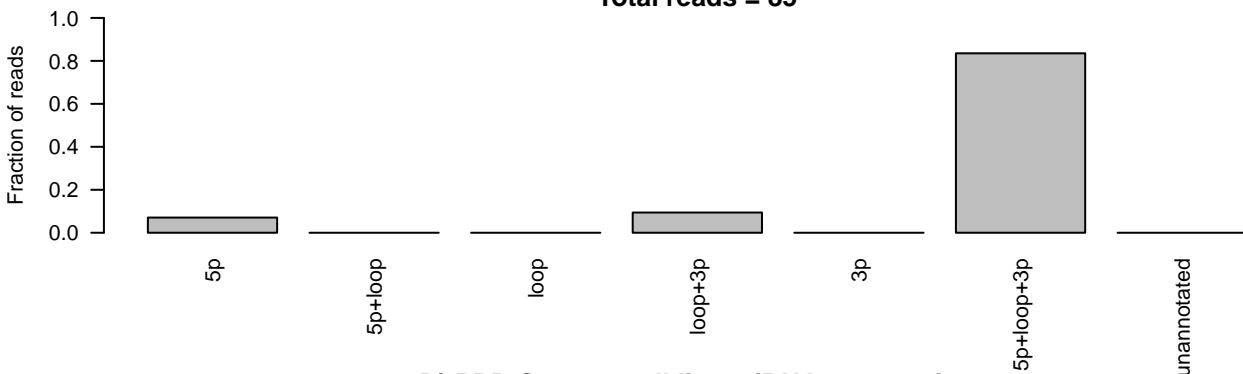

**D) PPB Case 14 cell line miRNA sequencing**  
ID=MI0014181\_1;accession\_number=MI0014181;Name=hsa-mir-3074  
Total reads = 42

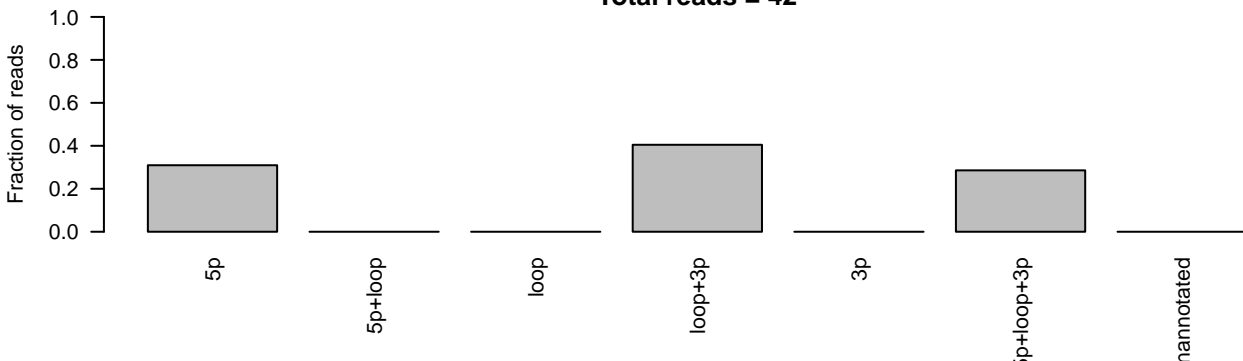

**B) Normal fibroblast miRNA sequencing**  
ID=MI0000080\_1;accession\_number=MI0000080;Name=hsa-mir-24-1  
Total reads = 59

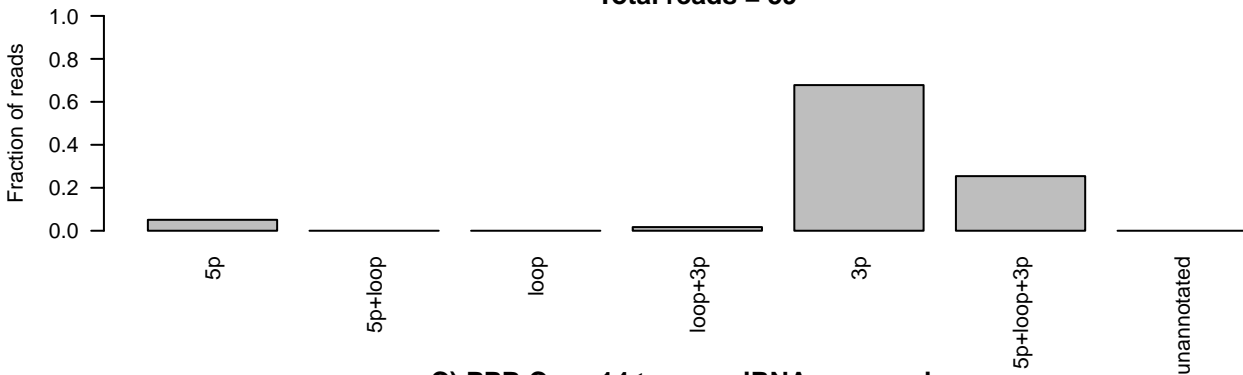

**C) PPB Case 14 tumor miRNA sequencing**  
ID=MI0000080\_1;accession\_number=MI0000080;Name=hsa-mir-24-1  
Total reads = 85

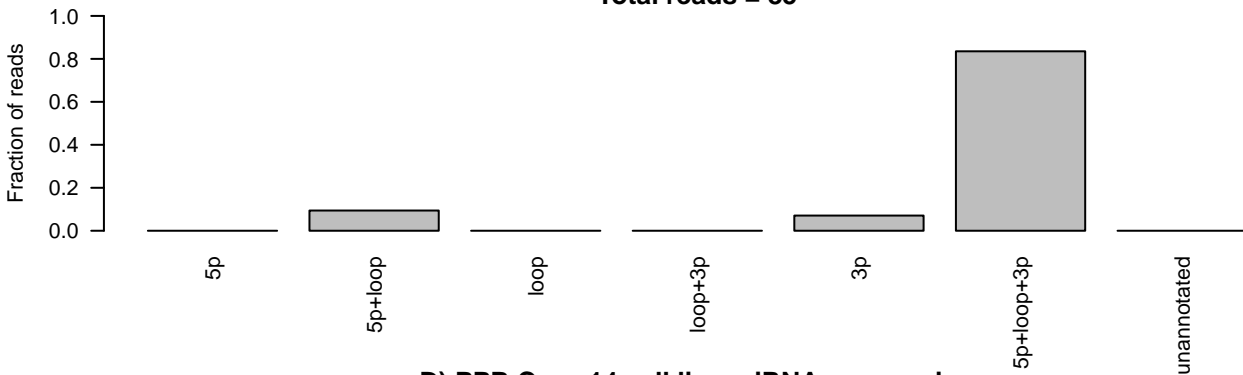

**D) PPB Case 14 cell line miRNA sequencing**  
ID=MI0000080\_1;accession\_number=MI0000080;Name=hsa-mir-24-1  
Total reads = 43

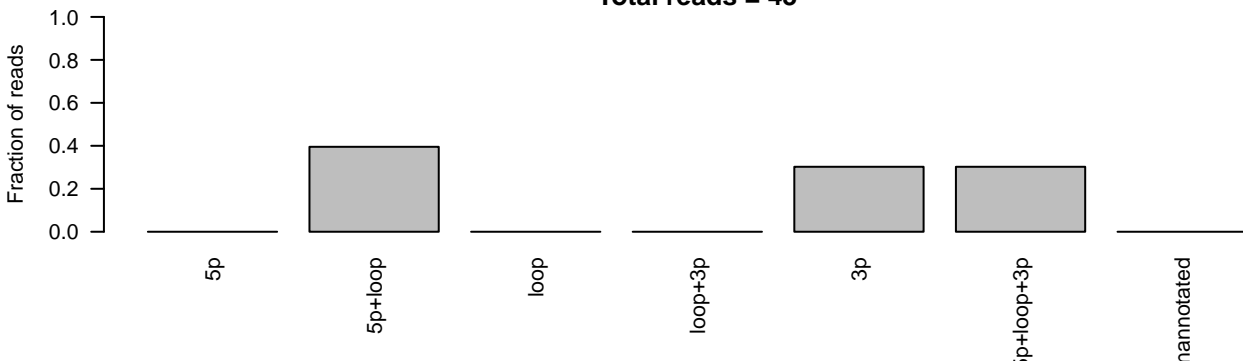

**B) Normal fibroblast miRNA sequencing**  
ID=MI0000474\_1;accession\_number=MI0000474;Name=hsa-mir-134  
Total reads = 57

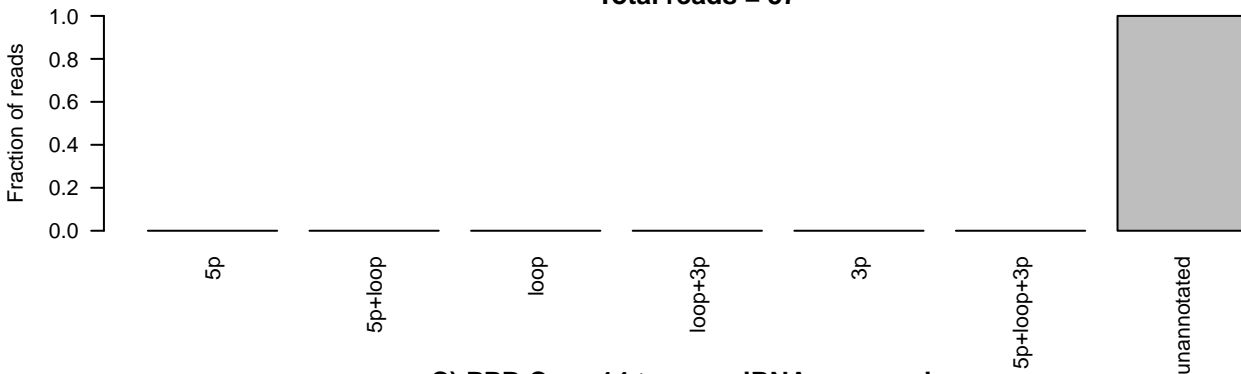

**C) PPB Case 14 tumor miRNA sequencing**  
ID=MI0000474\_1;accession\_number=MI0000474;Name=hsa-mir-134  
Total reads = 2

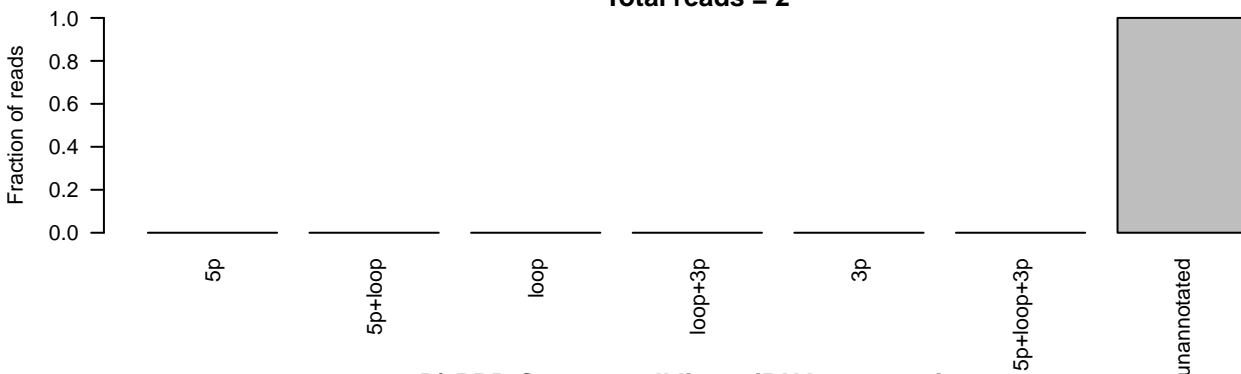

**D) PPB Case 14 cell line miRNA sequencing**  
ID=MI0000474\_1;accession\_number=MI0000474;Name=hsa-mir-134  
Total reads = 3

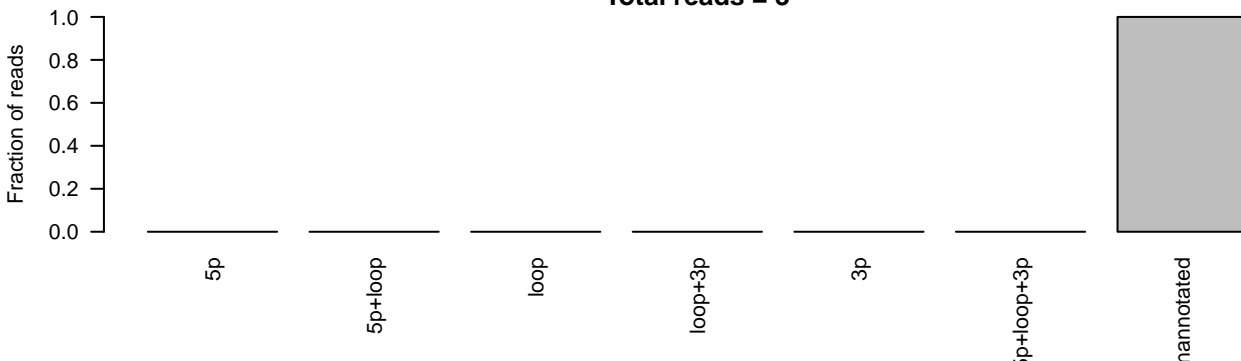



**B) Normal fibroblast miRNA sequencing**  
ID=MI0000084\_1;accession\_number=MI0000084;Name=hsa-mir-26b  
Total reads = 59

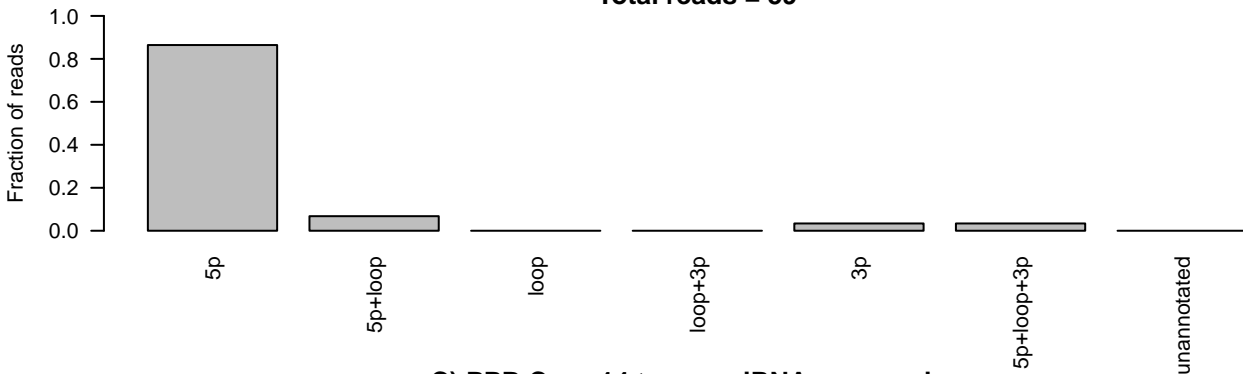

**C) PPB Case 14 tumor miRNA sequencing**  
ID=MI0000084\_1;accession\_number=MI0000084;Name=hsa-mir-26b  
Total reads = 8

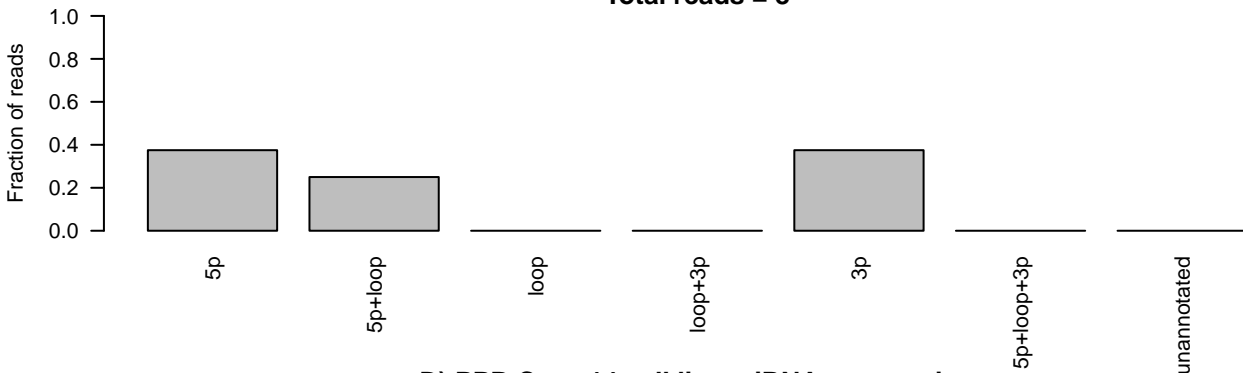

**D) PPB Case 14 cell line miRNA sequencing**  
ID=MI0000084\_1;accession\_number=MI0000084;Name=hsa-mir-26b  
Total reads = 1

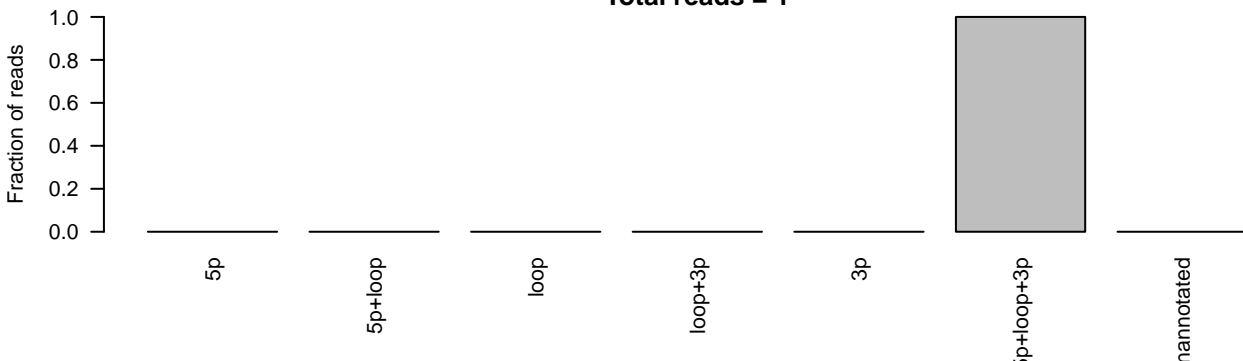

**B) Normal fibroblast miRNA sequencing**  
ID=MI0003581\_1;accession\_number=MI0003581;Name=hsa-mir-574  
Total reads = 54

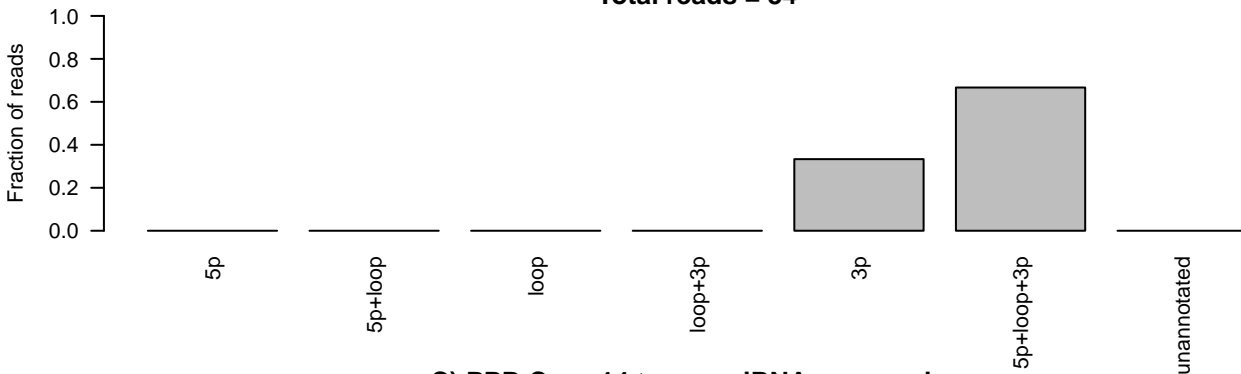

**C) PPB Case 14 tumor miRNA sequencing**  
ID=MI0003581\_1;accession\_number=MI0003581;Name=hsa-mir-574  
Total reads = 283

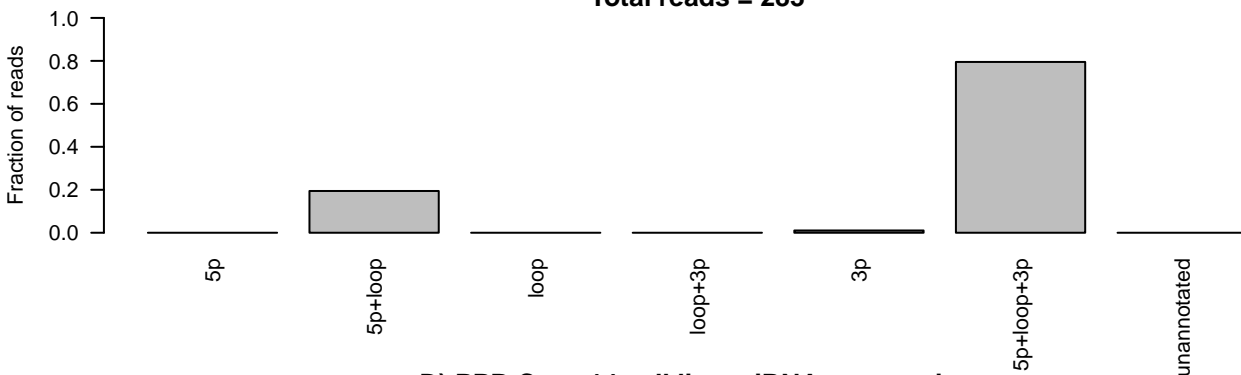

**D) PPB Case 14 cell line miRNA sequencing**  
ID=MI0003581\_1;accession\_number=MI0003581;Name=hsa-mir-574  
Total reads = 79

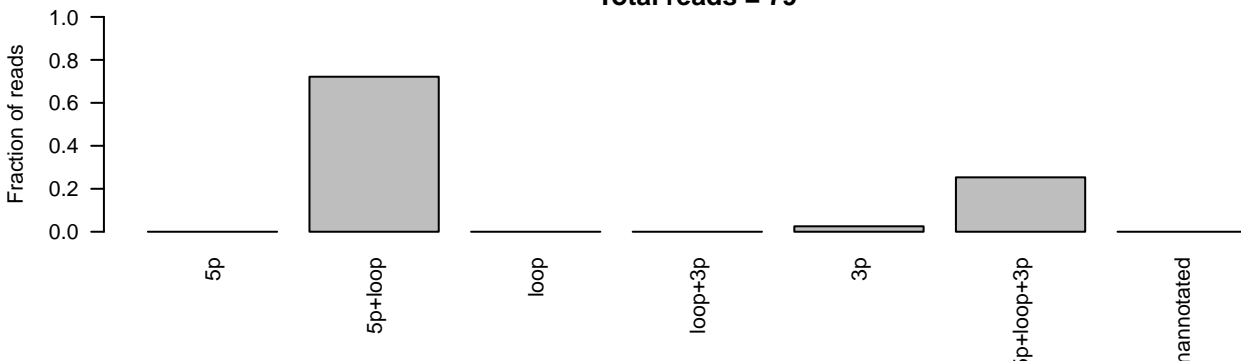

**B) Normal fibroblast miRNA sequencing**  
ID=MI0000060\_1;accession\_number=MI0000060;Name=hsa-let-7a-1  
Total reads = 55

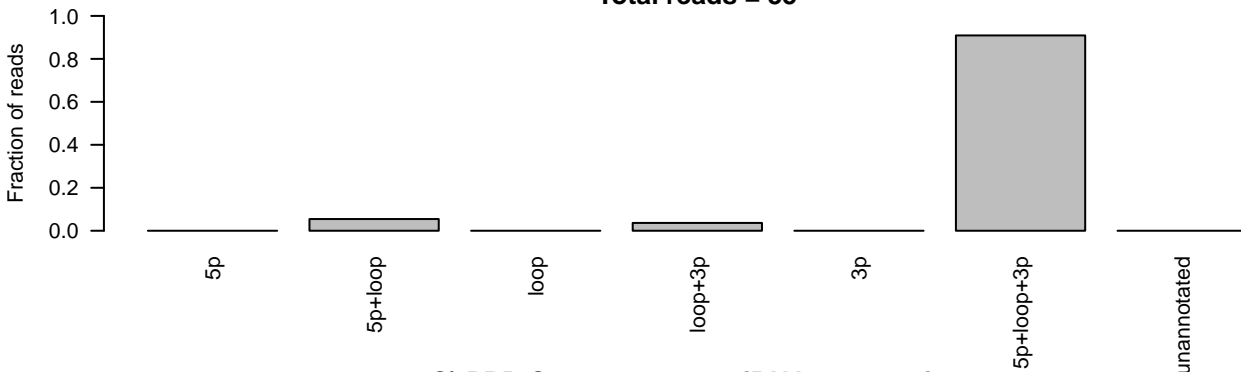

**C) PPB Case 14 tumor miRNA sequencing**  
ID=MI0000060\_1;accession\_number=MI0000060;Name=hsa-let-7a-1  
Total reads = 191

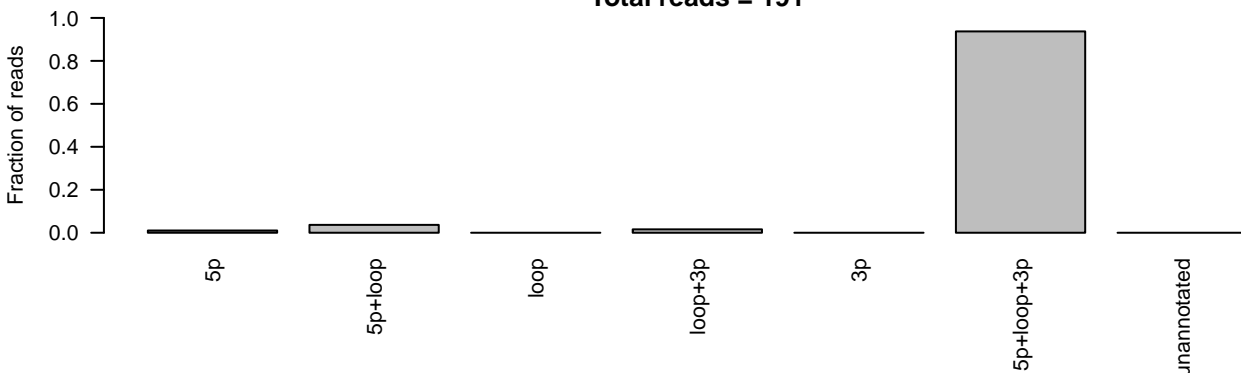

**D) PPB Case 14 cell line miRNA sequencing**  
ID=MI0000060\_1;accession\_number=MI0000060;Name=hsa-let-7a-1  
Total reads = 11

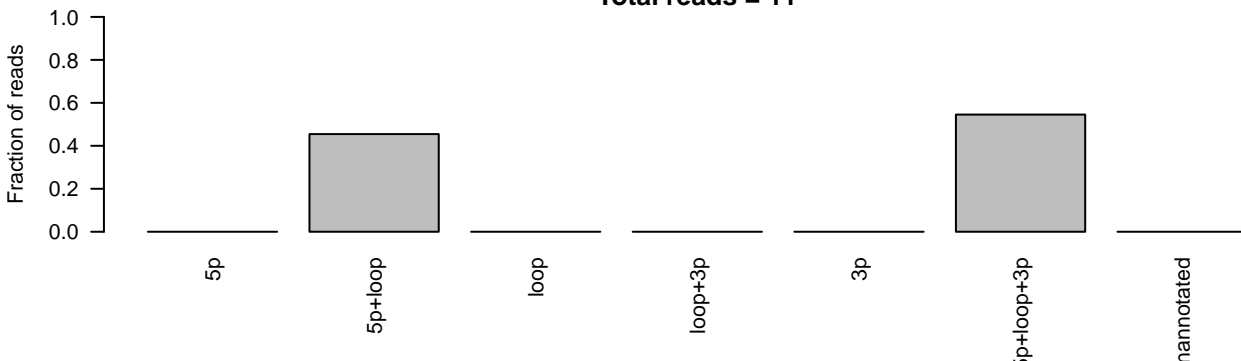

**B) Normal fibroblast miRNA sequencing**  
ID=MI0000290\_1;accession\_number=MI0000290;Name=hsa-mir-214  
Total reads = 54

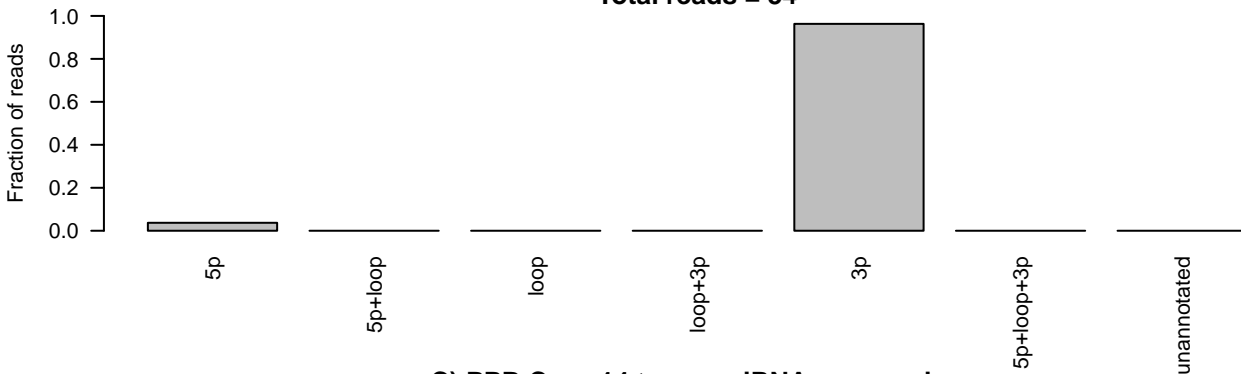

**C) PPB Case 14 tumor miRNA sequencing**  
ID=MI0000290\_1;accession\_number=MI0000290;Name=hsa-mir-214  
Total reads = 133

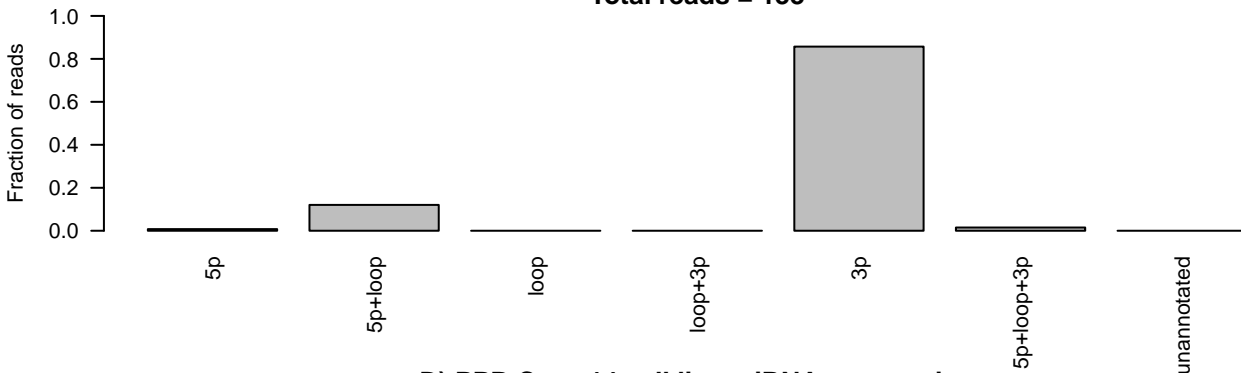

**D) PPB Case 14 cell line miRNA sequencing**  
ID=MI0000290\_1;accession\_number=MI0000290;Name=hsa-mir-214  
Total reads = 102

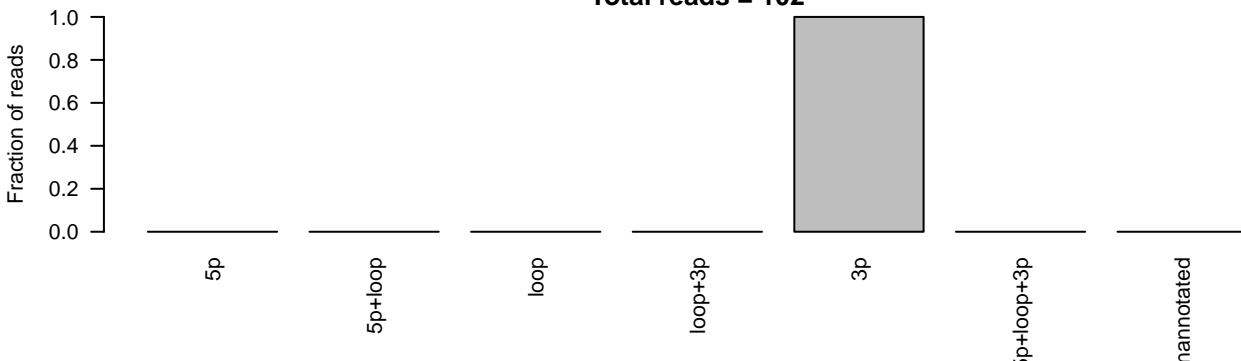

**B) Normal fibroblast miRNA sequencing**  
ID=MI0014136\_1;accession\_number=MI0014136;Name=hsa-mir-3120  
Total reads = 54

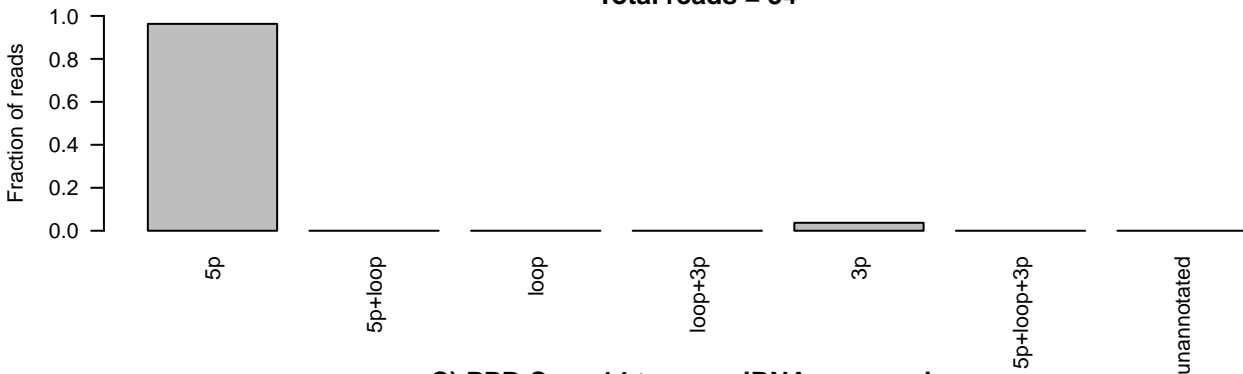

**C) PPB Case 14 tumor miRNA sequencing**  
ID=MI0014136\_1;accession\_number=MI0014136;Name=hsa-mir-3120  
Total reads = 133

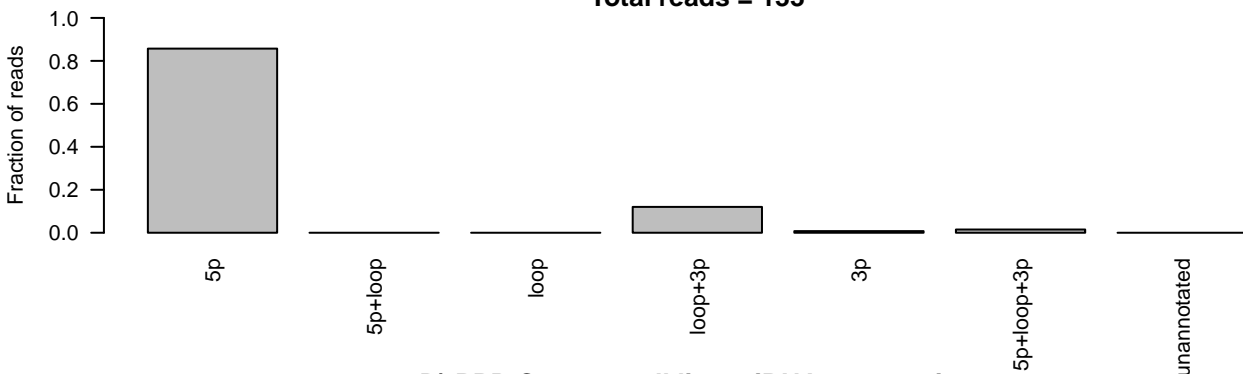

**D) PPB Case 14 cell line miRNA sequencing**  
ID=MI0014136\_1;accession\_number=MI0014136;Name=hsa-mir-3120  
Total reads = 102

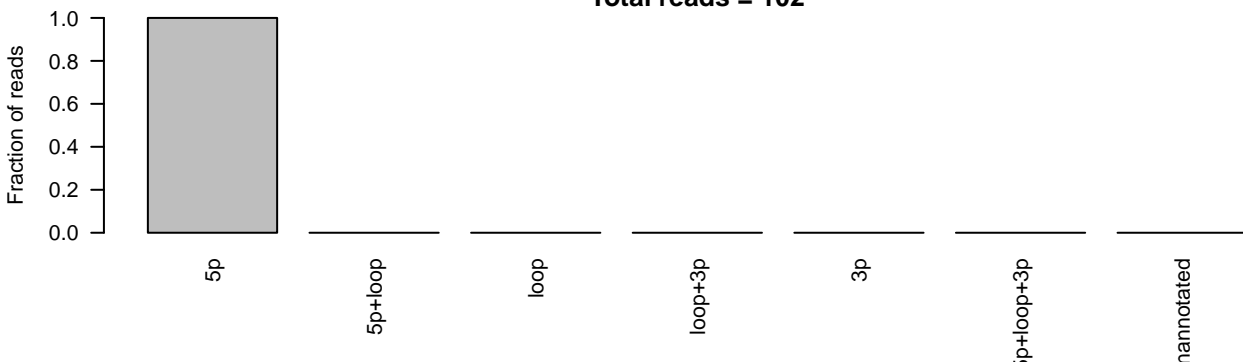

**B) Normal fibroblast miRNA sequencing**  
ID=MI0005559\_1;accession\_number=MI0005559;Name=hsa-mir-744  
Total reads = 50

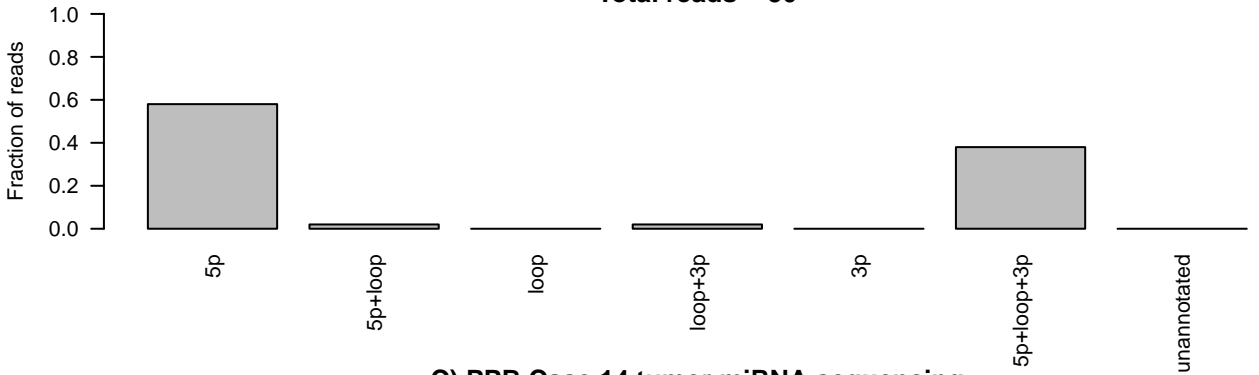

**C) PPB Case 14 tumor miRNA sequencing**  
ID=MI0005559\_1;accession\_number=MI0005559;Name=hsa-mir-744  
Total reads = 42

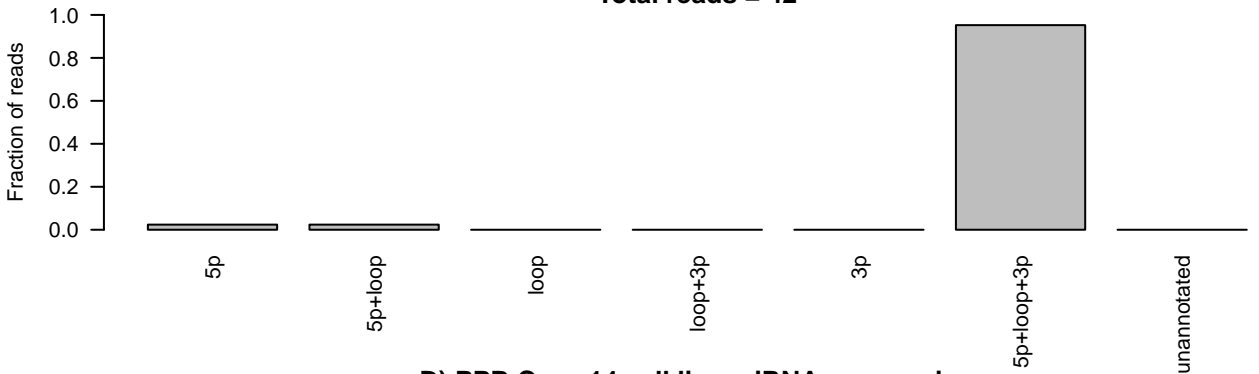

**D) PPB Case 14 cell line miRNA sequencing**  
ID=MI0005559\_1;accession\_number=MI0005559;Name=hsa-mir-744  
Total reads = 18

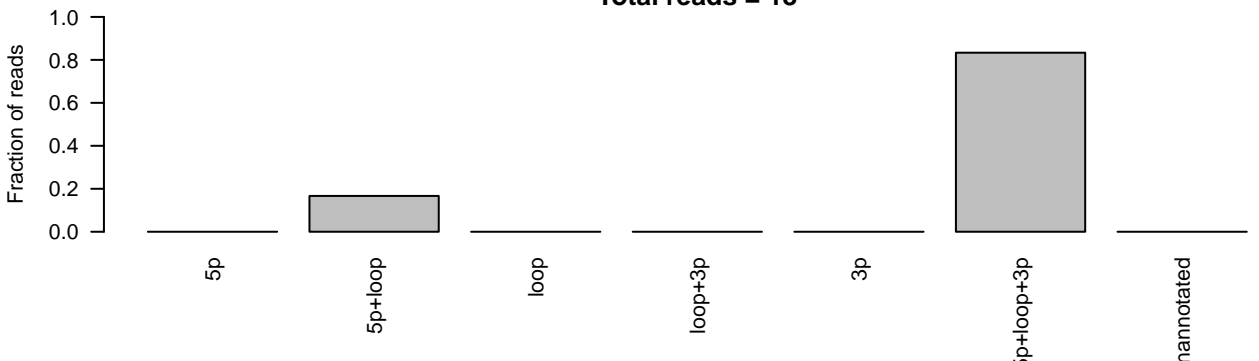

**B) Normal fibroblast miRNA sequencing**  
ID=MI0000734\_1;accession\_number=MI0000734;Name=hsa-mir-106b  
Total reads = 49

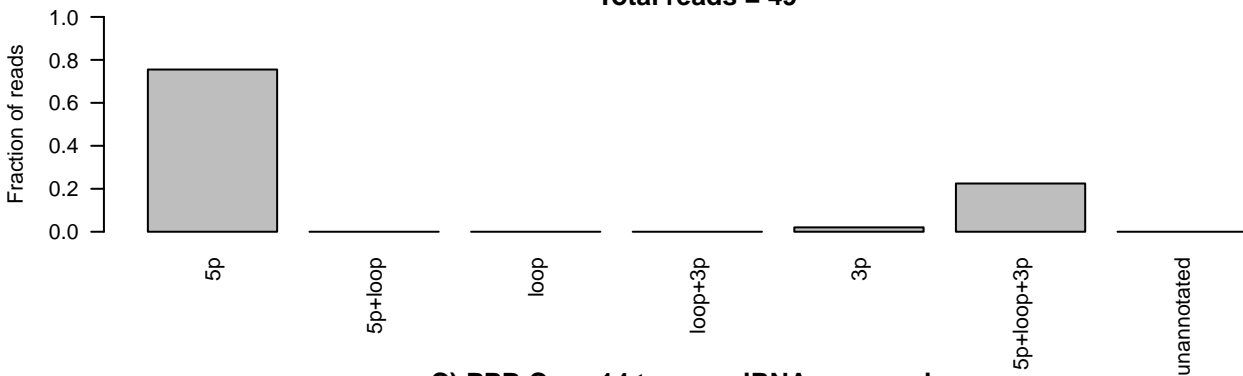

**C) PPB Case 14 tumor miRNA sequencing**  
ID=MI0000734\_1;accession\_number=MI0000734;Name=hsa-mir-106b  
Total reads = 15

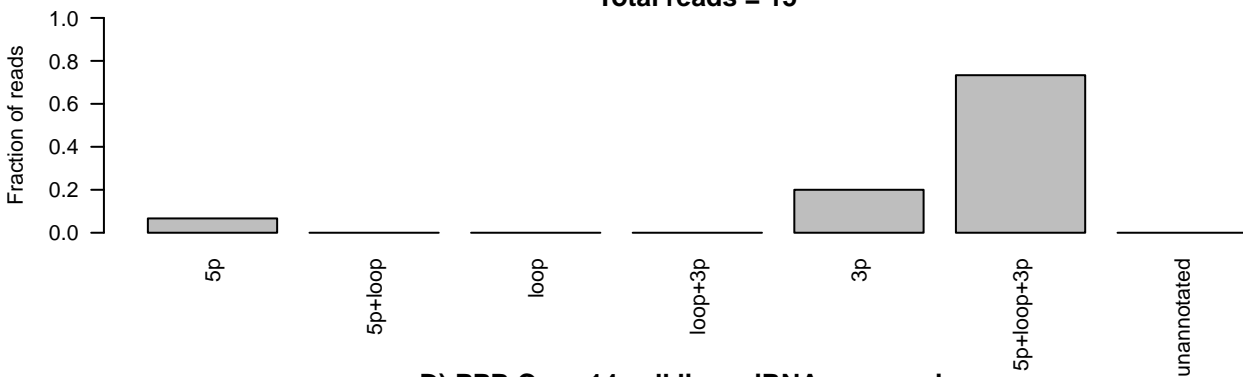

**D) PPB Case 14 cell line miRNA sequencing**  
ID=MI0000734\_1;accession\_number=MI0000734;Name=hsa-mir-106b  
Total reads = 5

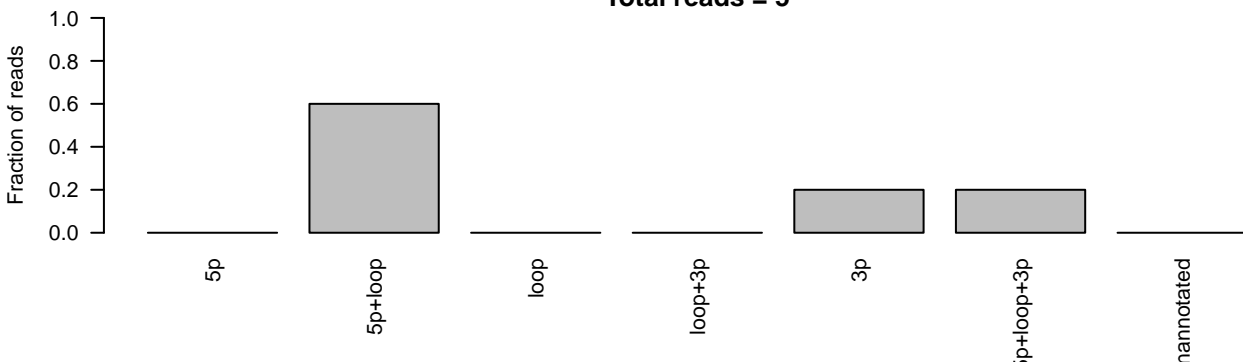

**B) Normal fibroblast miRNA sequencing**  
ID=MI0000301\_1;accession\_number=MI0000301;Name=hsa-mir-224  
Total reads = 0

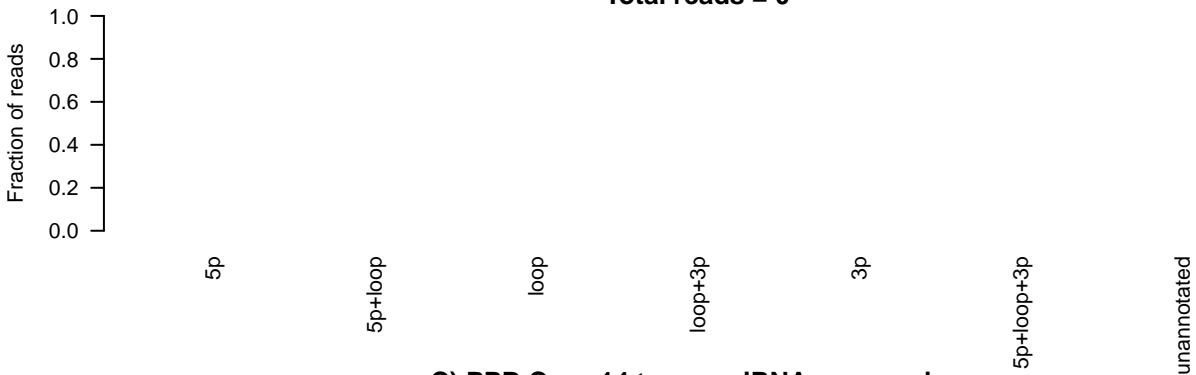

**C) PPB Case 14 tumor miRNA sequencing**  
ID=MI0000301\_1;accession\_number=MI0000301;Name=hsa-mir-224  
Total reads = 0



**D) PPB Case 14 cell line miRNA sequencing**  
ID=MI0000301\_1;accession\_number=MI0000301;Name=hsa-mir-224  
Total reads = 0





**B) Normal fibroblast miRNA sequencing**  
ID=MI0016077\_1;accession\_number=MI0016077;Name=hsa-mir-3676  
Total reads = 20

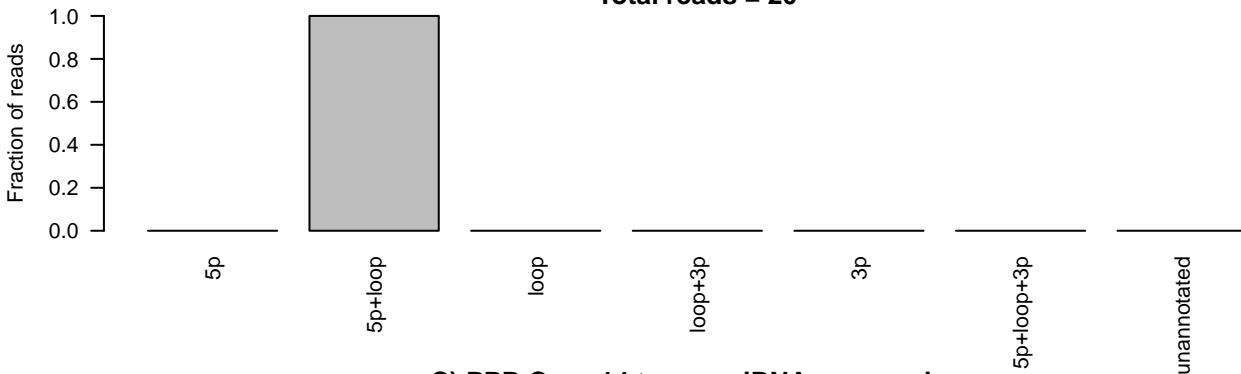

**C) PPB Case 14 tumor miRNA sequencing**  
ID=MI0016077\_1;accession\_number=MI0016077;Name=hsa-mir-3676  
Total reads = 44

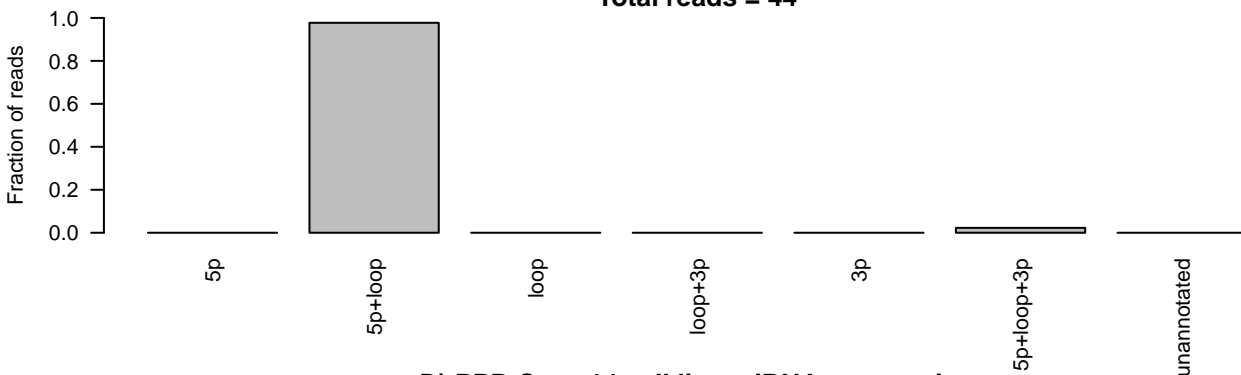

**D) PPB Case 14 cell line miRNA sequencing**  
ID=MI0016077\_1;accession\_number=MI0016077;Name=hsa-mir-3676  
Total reads = 4

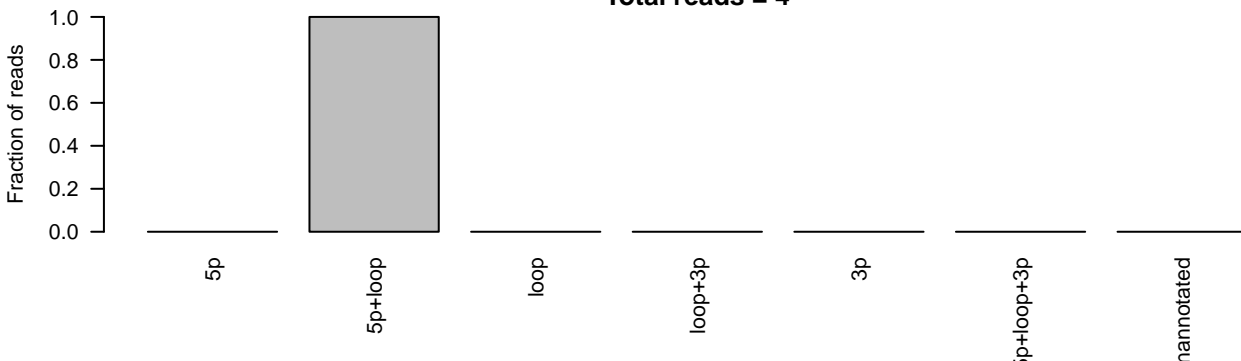

**B) Normal fibroblast miRNA sequencing**  
ID=MI0000078\_1;accession\_number=MI0000078;Name=hsa-mir-22  
Total reads = 39

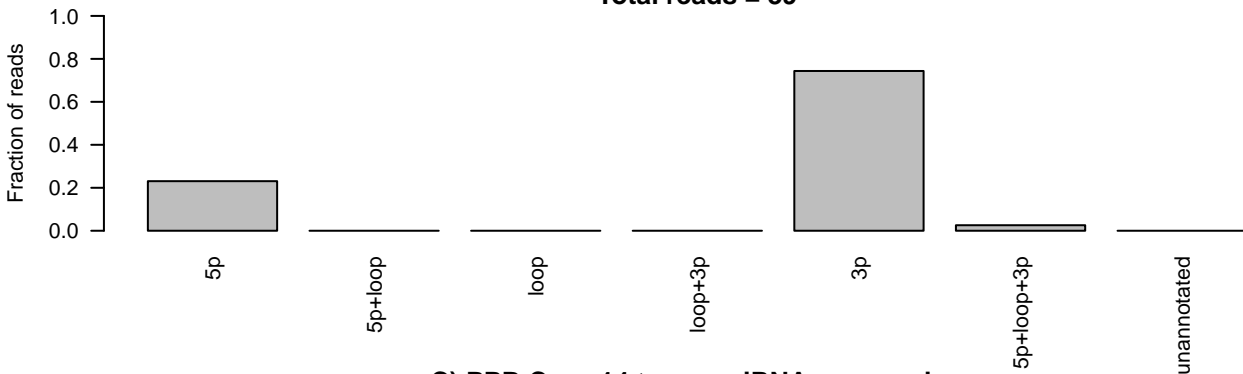

**C) PPB Case 14 tumor miRNA sequencing**  
ID=MI0000078\_1;accession\_number=MI0000078;Name=hsa-mir-22  
Total reads = 10

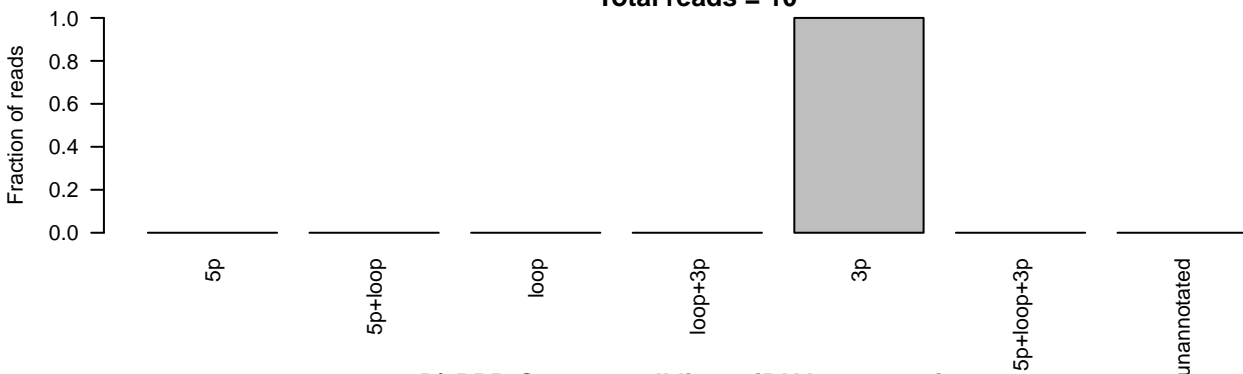

**D) PPB Case 14 cell line miRNA sequencing**  
ID=MI0000078\_1;accession\_number=MI0000078;Name=hsa-mir-22  
Total reads = 11

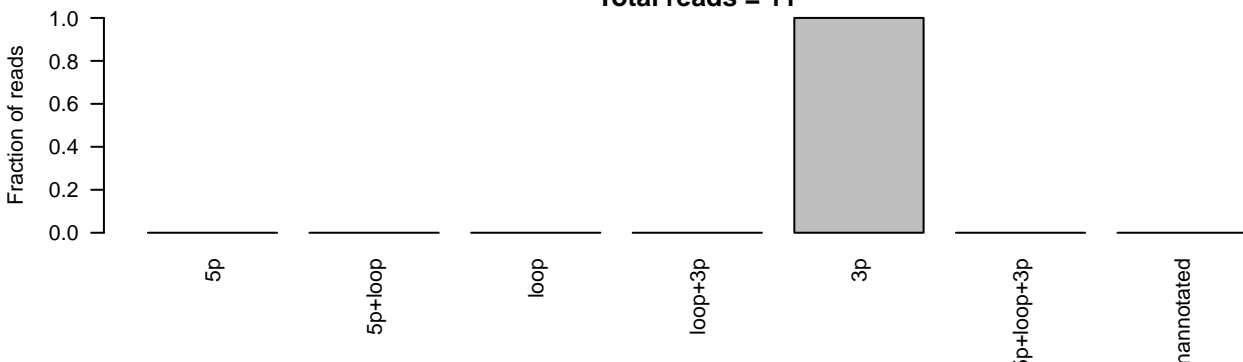

**B) Normal fibroblast miRNA sequencing**  
ID=MI0000462\_1;accession\_number=MI0000462;Name=hsa-mir-152  
Total reads = 33

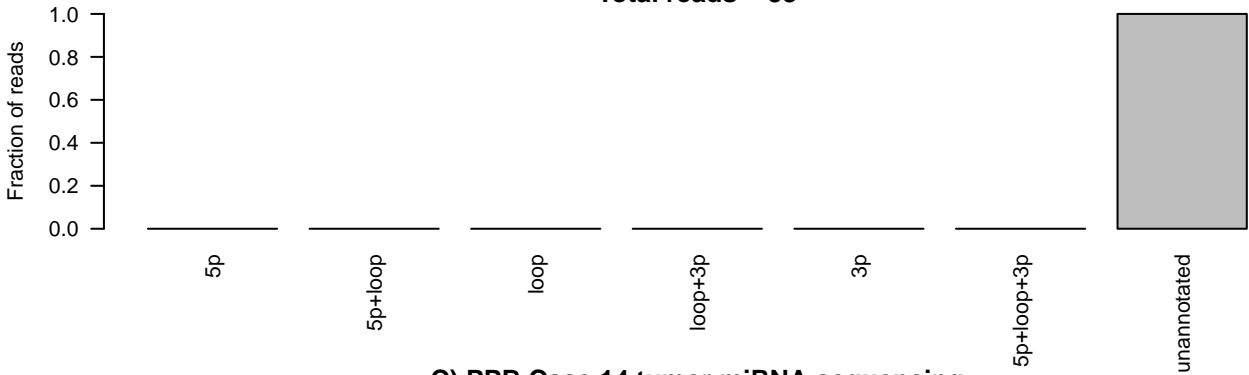

**C) PPB Case 14 tumor miRNA sequencing**  
ID=MI0000462\_1;accession\_number=MI0000462;Name=hsa-mir-152  
Total reads = 50

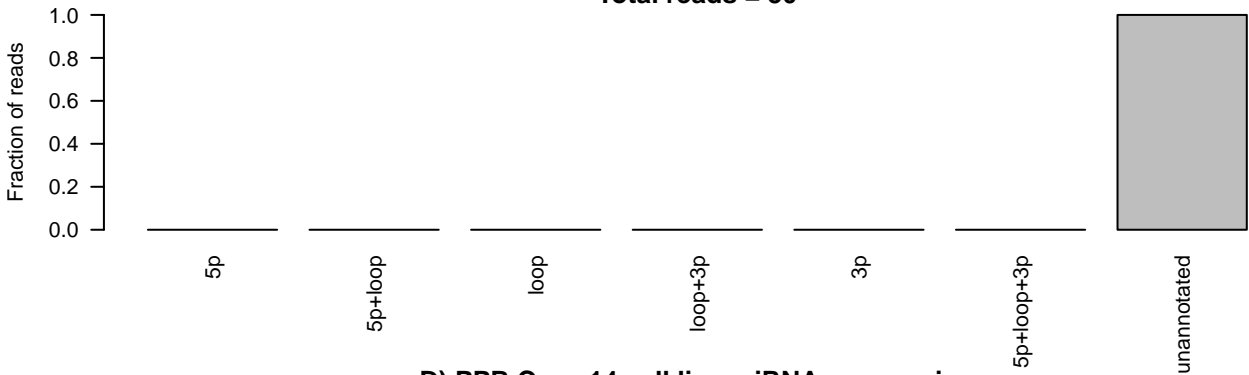

**D) PPB Case 14 cell line miRNA sequencing**  
ID=MI0000462\_1;accession\_number=MI0000462;Name=hsa-mir-152  
Total reads = 8

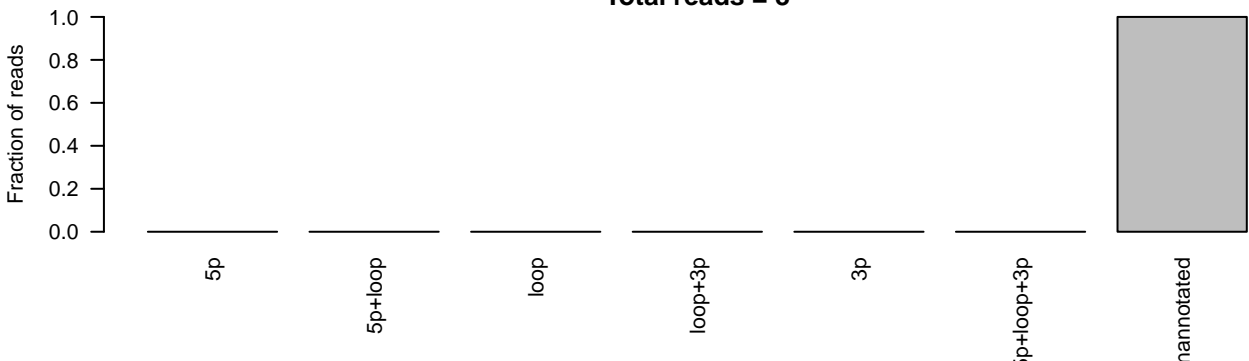

**B) Normal fibroblast miRNA sequencing**  
ID=MI0006383\_1;accession\_number=MI0006383;Name=hsa-mir-1248  
Total reads = 0

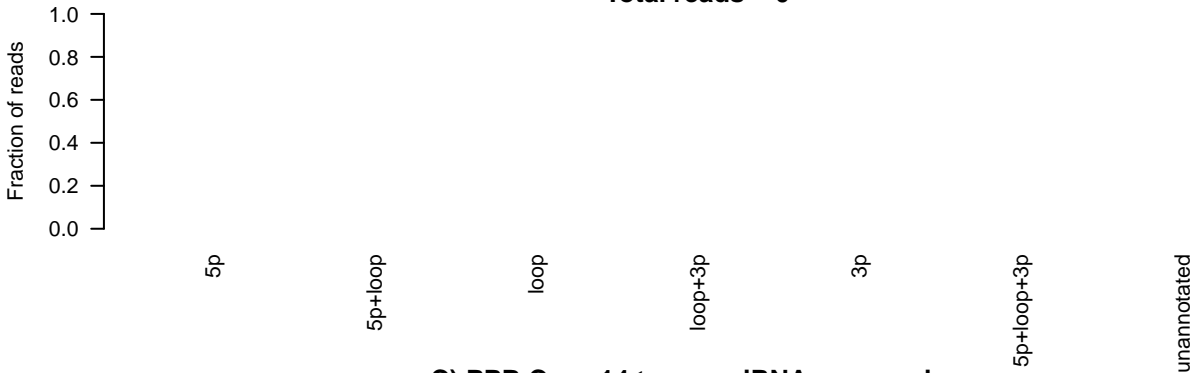

**C) PPB Case 14 tumor miRNA sequencing**  
ID=MI0006383\_1;accession\_number=MI0006383;Name=hsa-mir-1248  
Total reads = 0

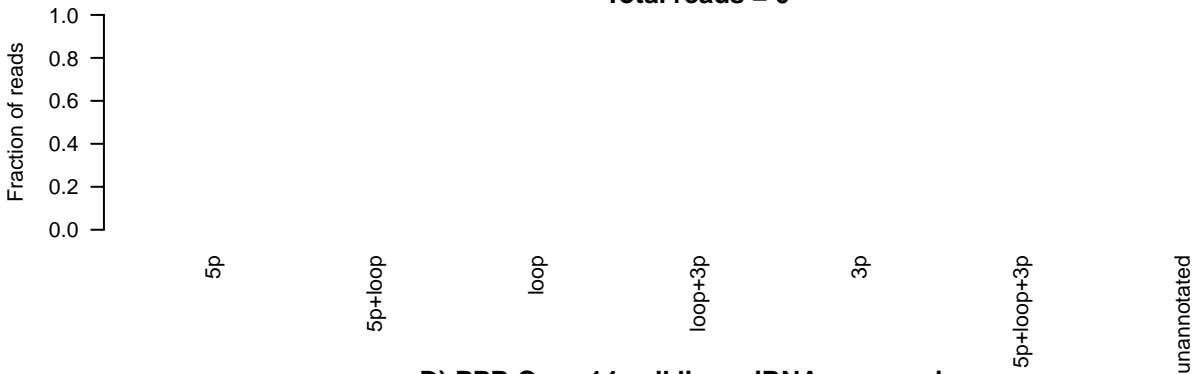

**D) PPB Case 14 cell line miRNA sequencing**  
ID=MI0006383\_1;accession\_number=MI0006383;Name=hsa-mir-1248  
Total reads = 0

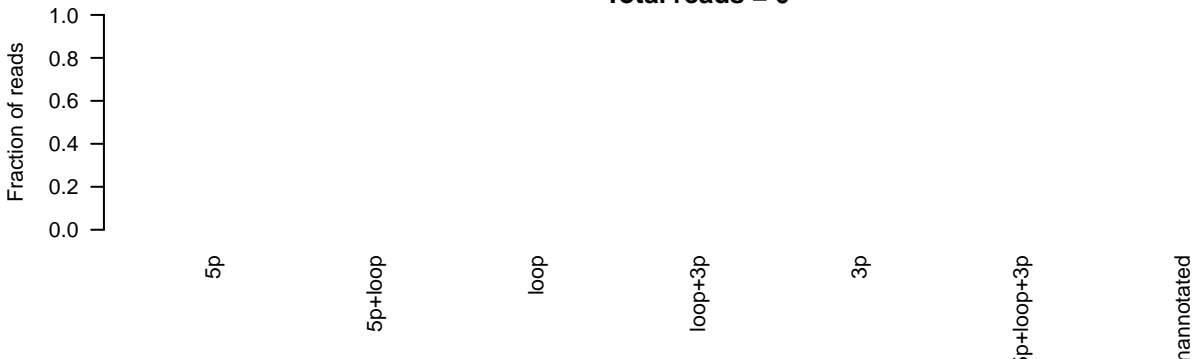

**B) Normal fibroblast miRNA sequencing**  
ID=MI0000286\_1;accession\_number=MI0000286;Name=hsa-mir-210  
Total reads = 24

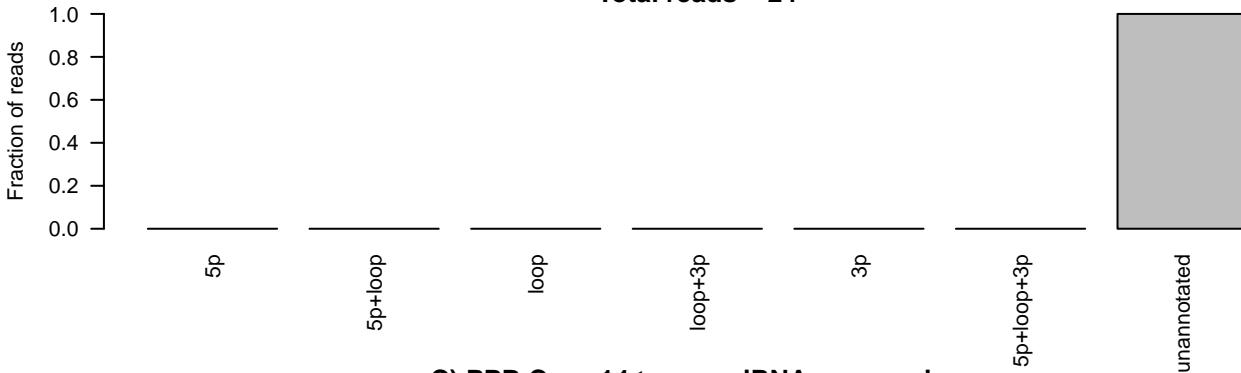

**C) PPB Case 14 tumor miRNA sequencing**  
ID=MI0000286\_1;accession\_number=MI0000286;Name=hsa-mir-210  
Total reads = 4

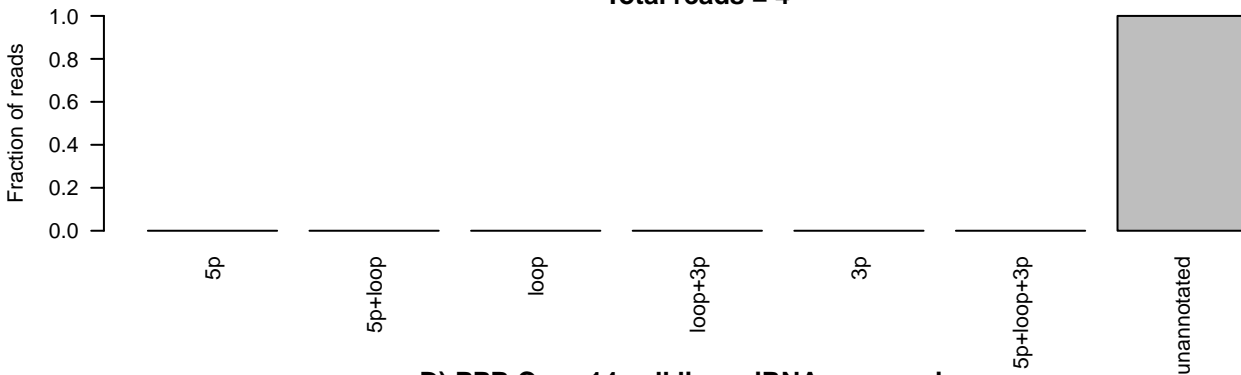

**D) PPB Case 14 cell line miRNA sequencing**  
ID=MI0000286\_1;accession\_number=MI0000286;Name=hsa-mir-210  
Total reads = 0

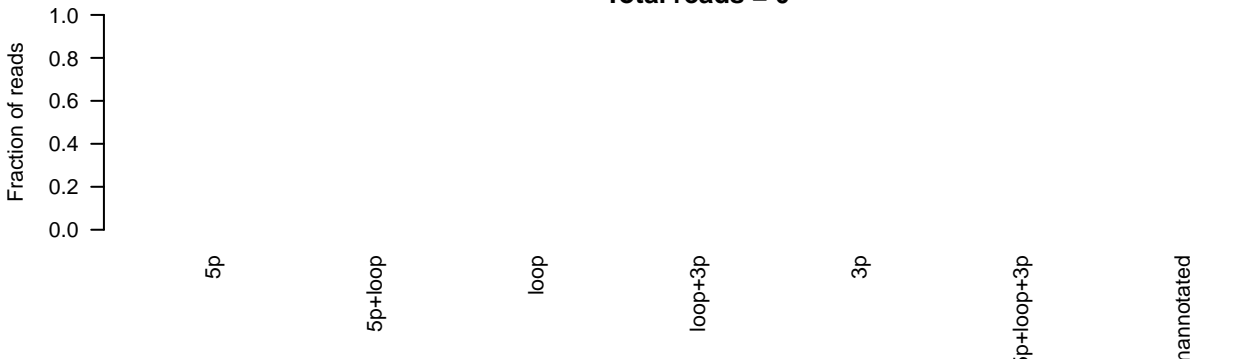

**B) Normal fibroblast miRNA sequencing**  
ID=MI0000440\_1;accession\_number=MI0000440;Name=hsa-mir-27b  
Total reads = 27

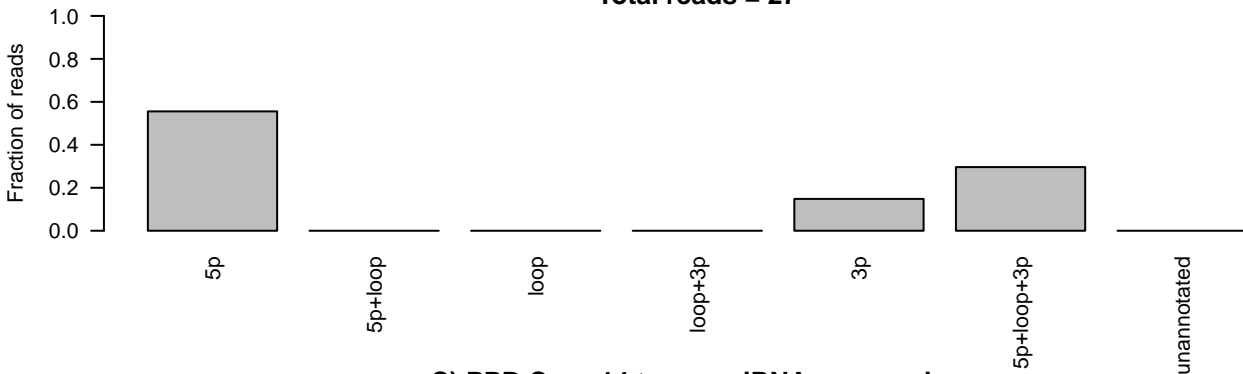

**C) PPB Case 14 tumor miRNA sequencing**  
ID=MI0000440\_1;accession\_number=MI0000440;Name=hsa-mir-27b  
Total reads = 14

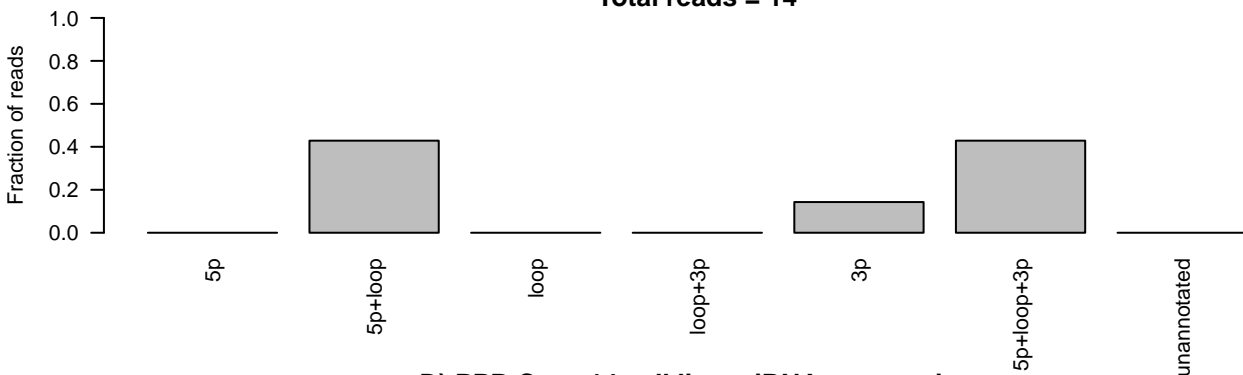

**D) PPB Case 14 cell line miRNA sequencing**  
ID=MI0000440\_1;accession\_number=MI0000440;Name=hsa-mir-27b  
Total reads = 13

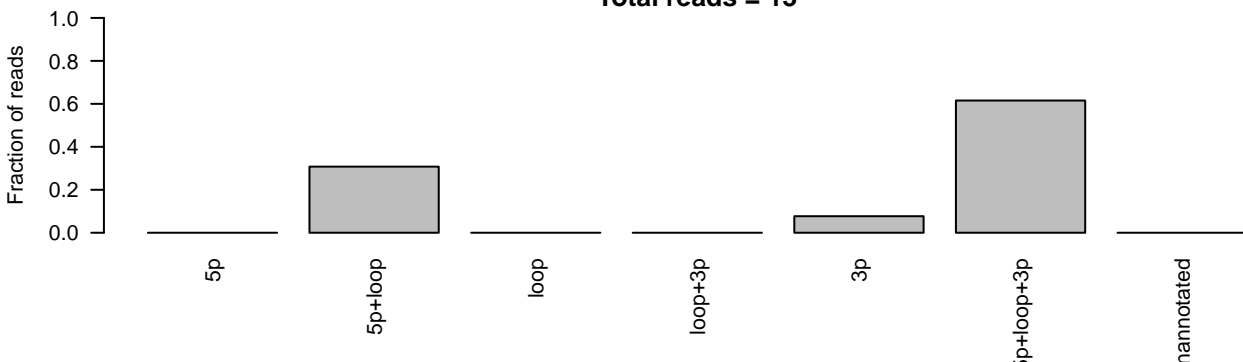

**B) Normal fibroblast miRNA sequencing**  
ID=MI0000438\_1;accession\_number=MI0000438;Name=hsa-mir-15b  
Total reads = 25

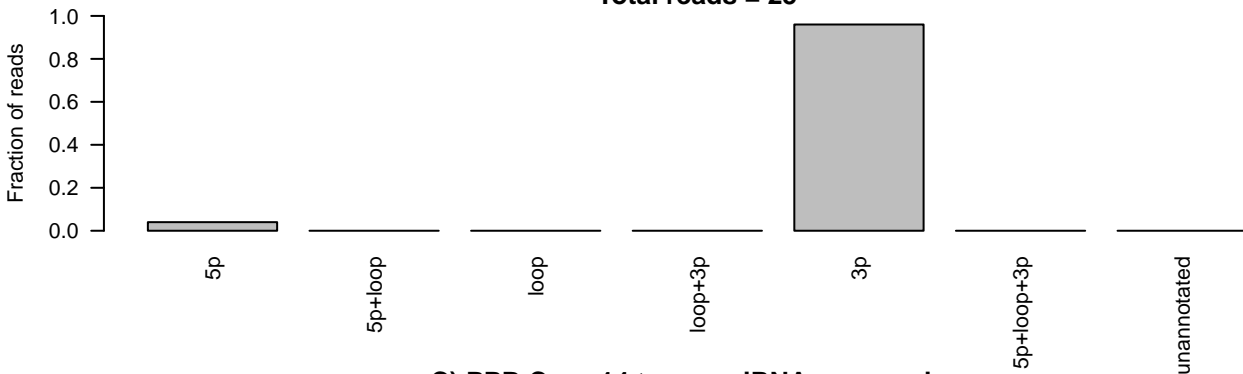

**C) PPB Case 14 tumor miRNA sequencing**  
ID=MI0000438\_1;accession\_number=MI0000438;Name=hsa-mir-15b  
Total reads = 29

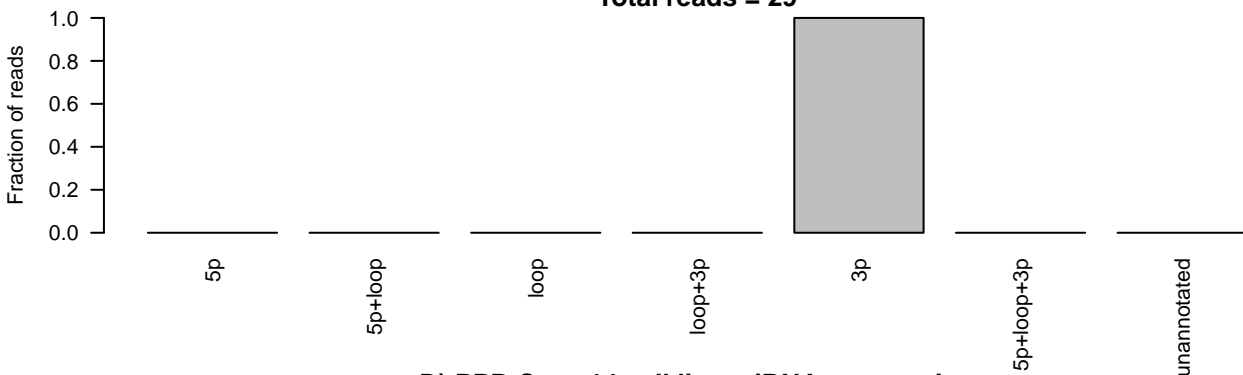

**D) PPB Case 14 cell line miRNA sequencing**  
ID=MI0000438\_1;accession\_number=MI0000438;Name=hsa-mir-15b  
Total reads = 13

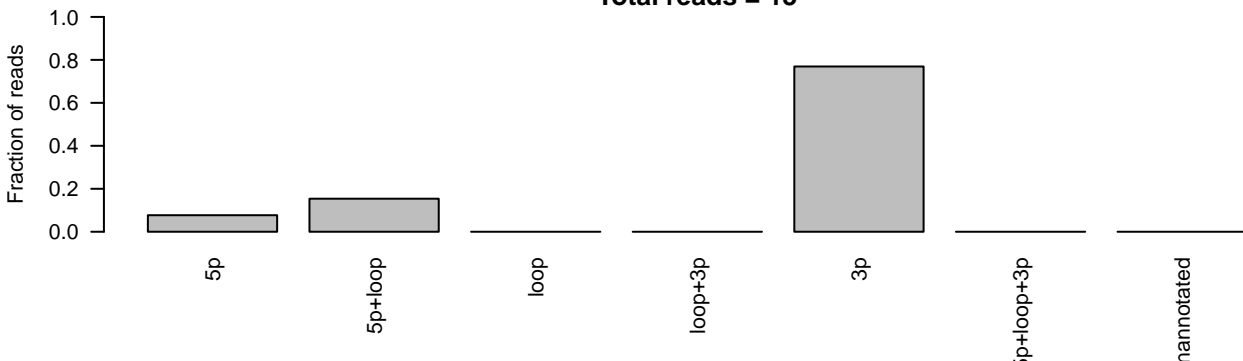

**B) Normal fibroblast miRNA sequencing**  
ID=MI0005561\_1;accession\_number=MI0005561;Name=hsa-mir-877  
Total reads = 27

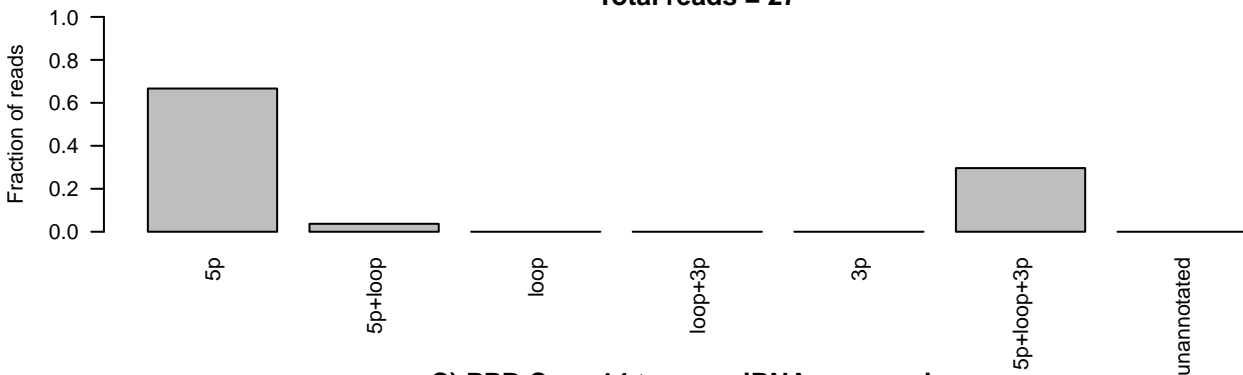

**C) PPB Case 14 tumor miRNA sequencing**  
ID=MI0005561\_1;accession\_number=MI0005561;Name=hsa-mir-877  
Total reads = 17

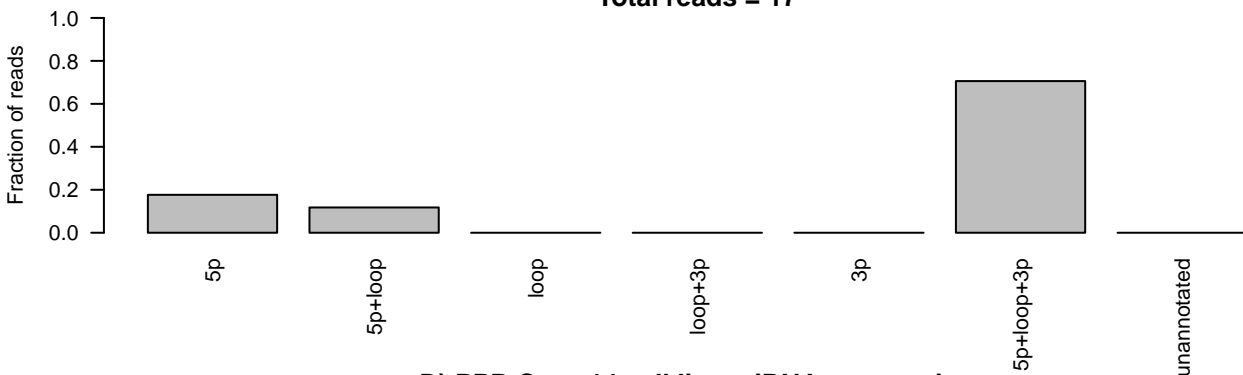

**D) PPB Case 14 cell line miRNA sequencing**  
ID=MI0005561\_1;accession\_number=MI0005561;Name=hsa-mir-877  
Total reads = 2





**B) Normal fibroblast miRNA sequencing**  
ID=MI0000082\_1;accession\_number=MI0000082;Name=hsa-mir-25  
Total reads = 27

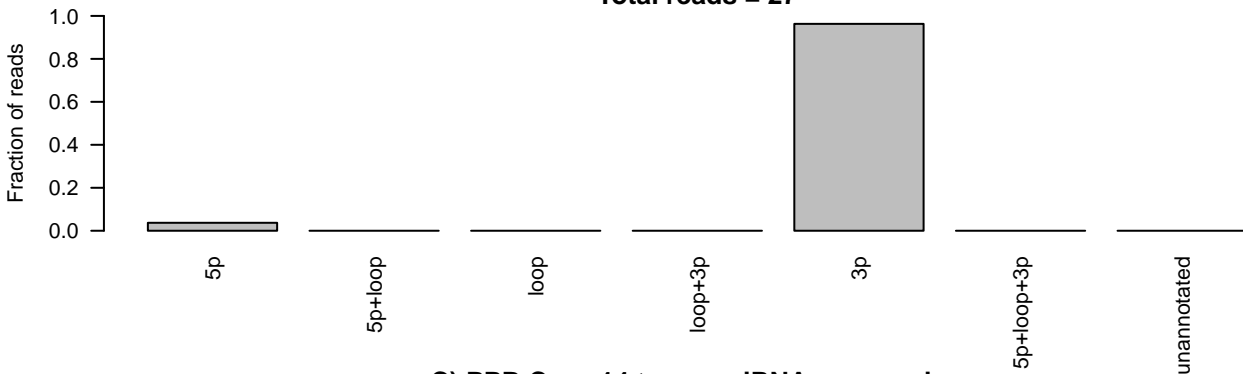

**C) PPB Case 14 tumor miRNA sequencing**  
ID=MI0000082\_1;accession\_number=MI0000082;Name=hsa-mir-25  
Total reads = 15

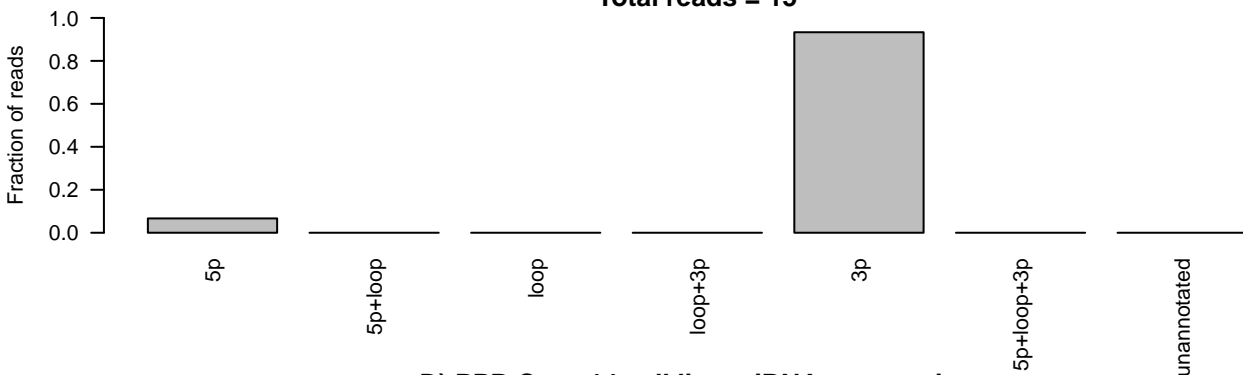

**D) PPB Case 14 cell line miRNA sequencing**  
ID=MI0000082\_1;accession\_number=MI0000082;Name=hsa-mir-25  
Total reads = 0



**B) Normal fibroblast miRNA sequencing**  
ID=MI0000760\_1;accession\_number=MI0000760;Name=hsa-mir-361  
Total reads = 28

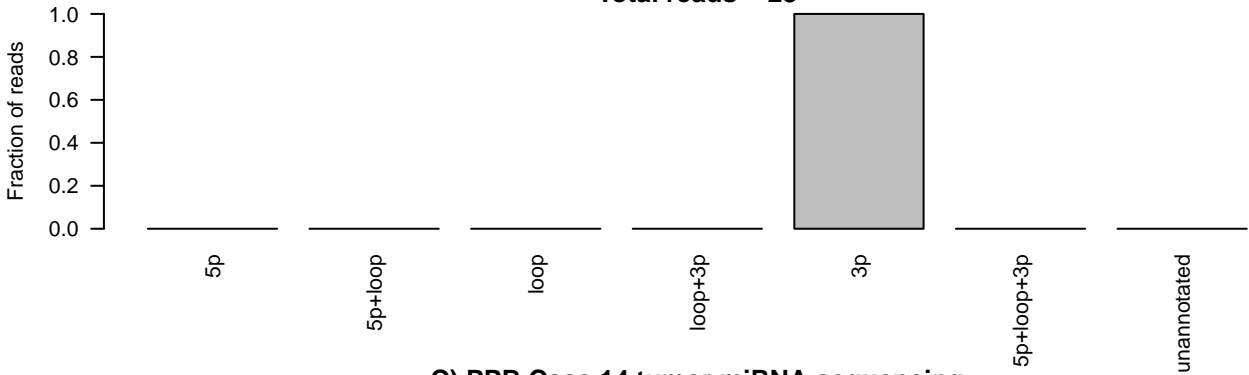

**C) PPB Case 14 tumor miRNA sequencing**  
ID=MI0000760\_1;accession\_number=MI0000760;Name=hsa-mir-361  
Total reads = 1

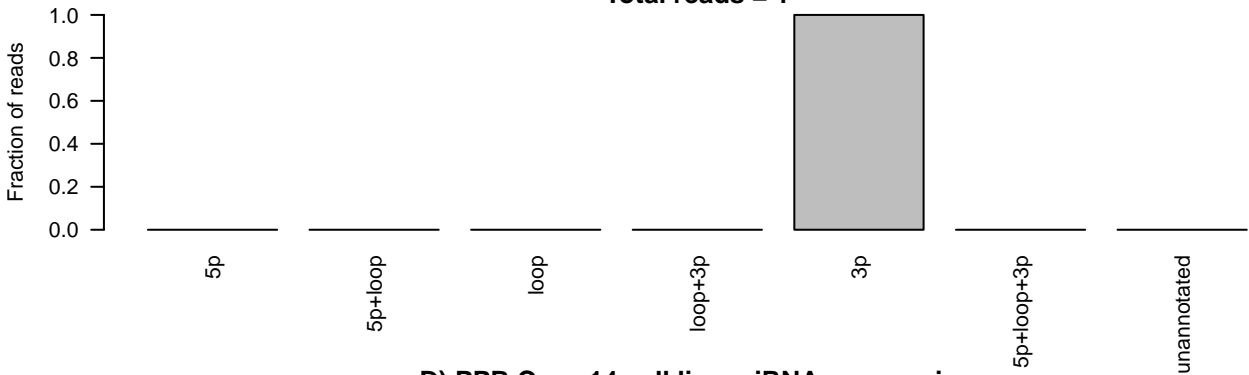

**D) PPB Case 14 cell line miRNA sequencing**  
ID=MI0000760\_1;accession\_number=MI0000760;Name=hsa-mir-361  
Total reads = 9

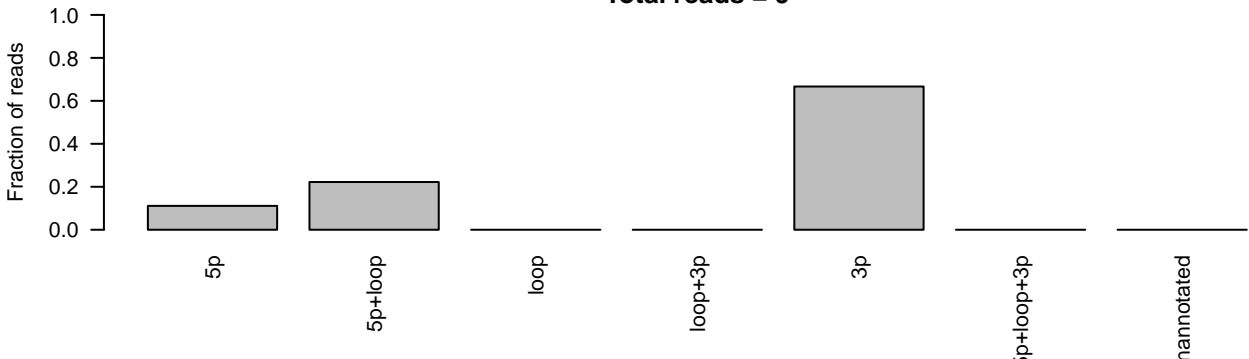

**B) Normal fibroblast miRNA sequencing**  
ID=MI0000109\_1;accession\_number=MI0000109;Name=hsa-mir-103a-1  
Total reads = 23

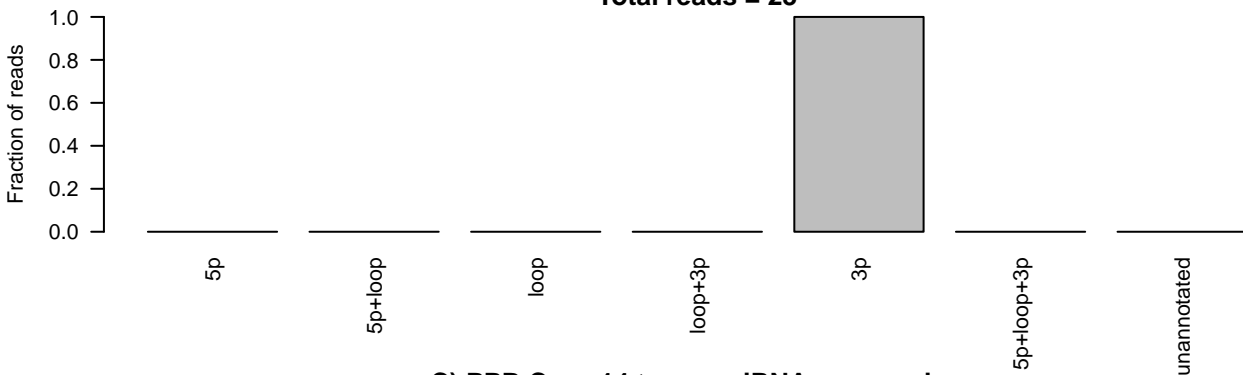

**C) PPB Case 14 tumor miRNA sequencing**  
ID=MI0000109\_1;accession\_number=MI0000109;Name=hsa-mir-103a-1  
Total reads = 9

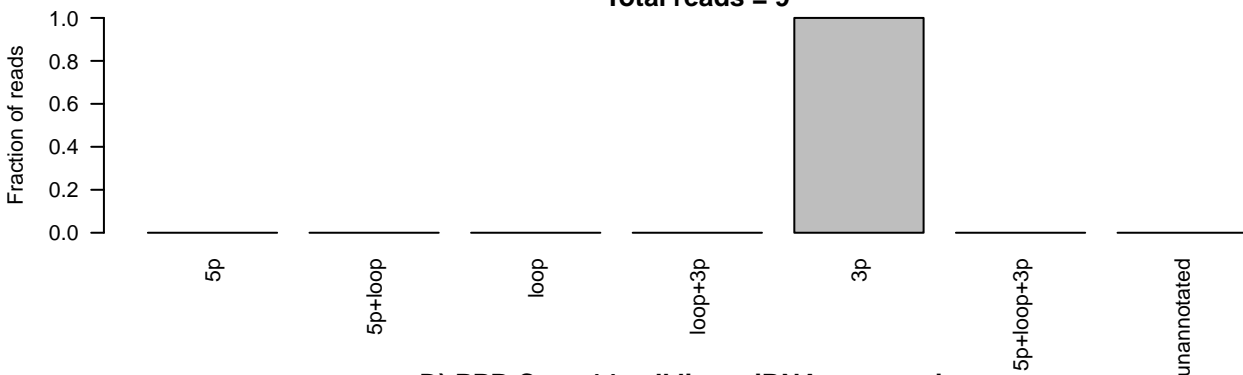

**D) PPB Case 14 cell line miRNA sequencing**  
ID=MI0000109\_1;accession\_number=MI0000109;Name=hsa-mir-103a-1  
Total reads = 3

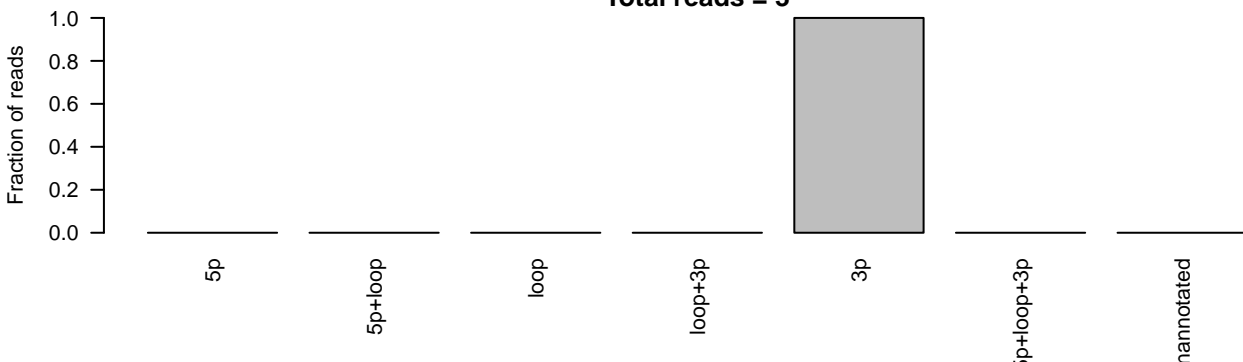

### B) Normal fibroblast miRNA sequencing

ID=MI0007261\_1;accession\_number=MI0007261;Name=hsa-mir-103b-1

Total reads = 23

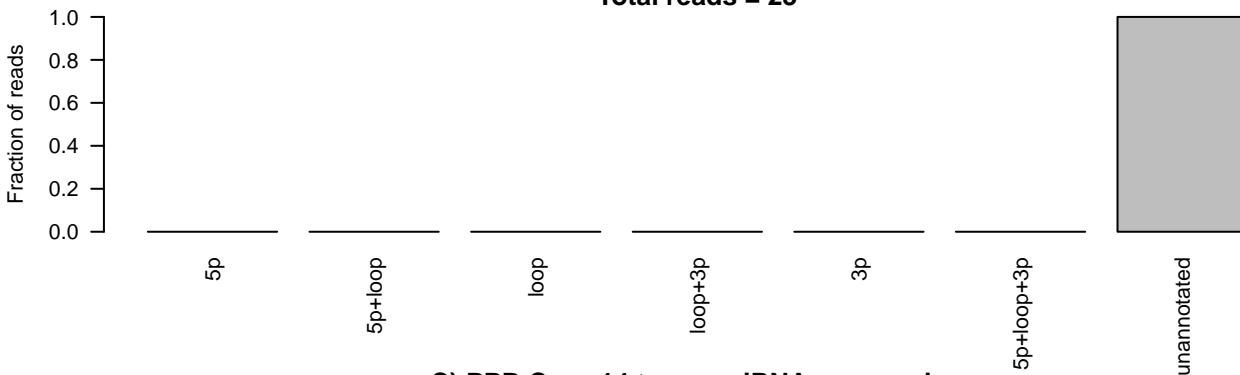

### C) PPB Case 14 tumor miRNA sequencing

ID=MI0007261\_1;accession\_number=MI0007261;Name=hsa-mir-103b-1

Total reads = 9

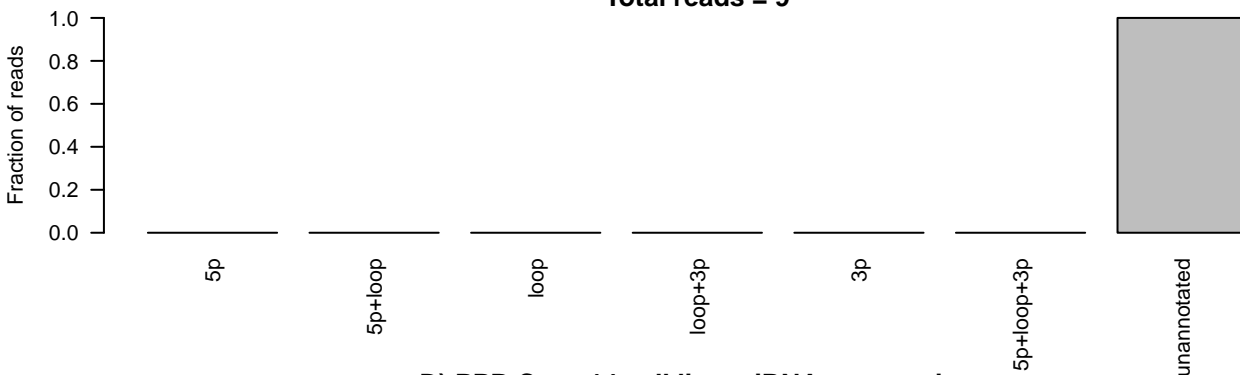

### D) PPB Case 14 cell line miRNA sequencing

ID=MI0007261\_1;accession\_number=MI0007261;Name=hsa-mir-103b-1

Total reads = 3

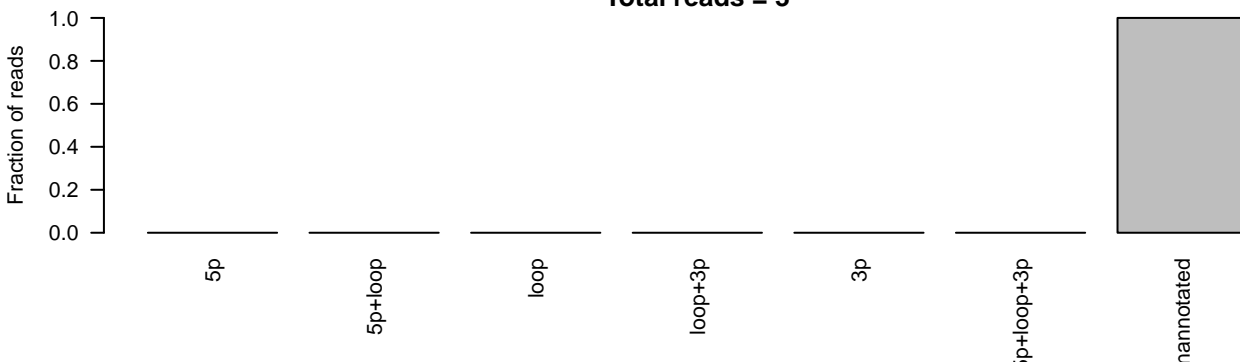

**B) Normal fibroblast miRNA sequencing**  
ID=MI0000441\_1;accession\_number=MI0000441;Name=hsa-mir-30b  
Total reads = 27

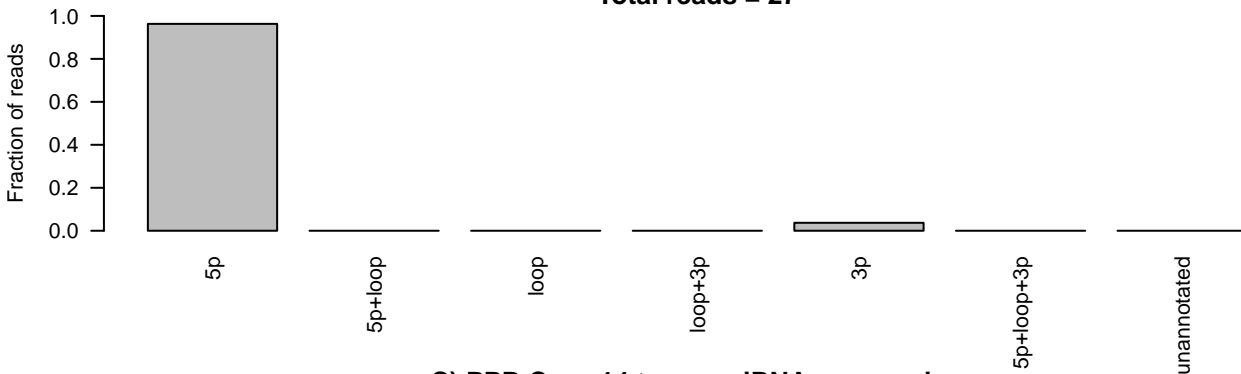

**C) PPB Case 14 tumor miRNA sequencing**  
ID=MI0000441\_1;accession\_number=MI0000441;Name=hsa-mir-30b  
Total reads = 18

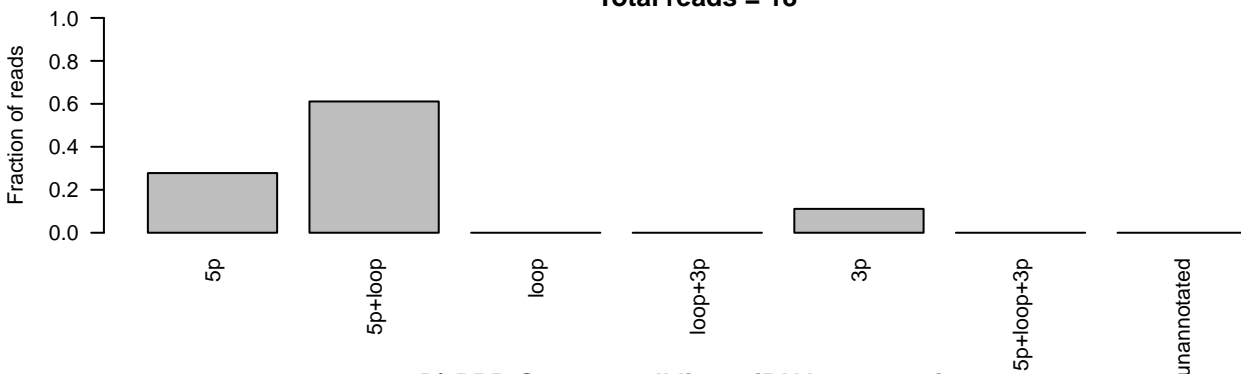

**D) PPB Case 14 cell line miRNA sequencing**  
ID=MI0000441\_1;accession\_number=MI0000441;Name=hsa-mir-30b  
Total reads = 2

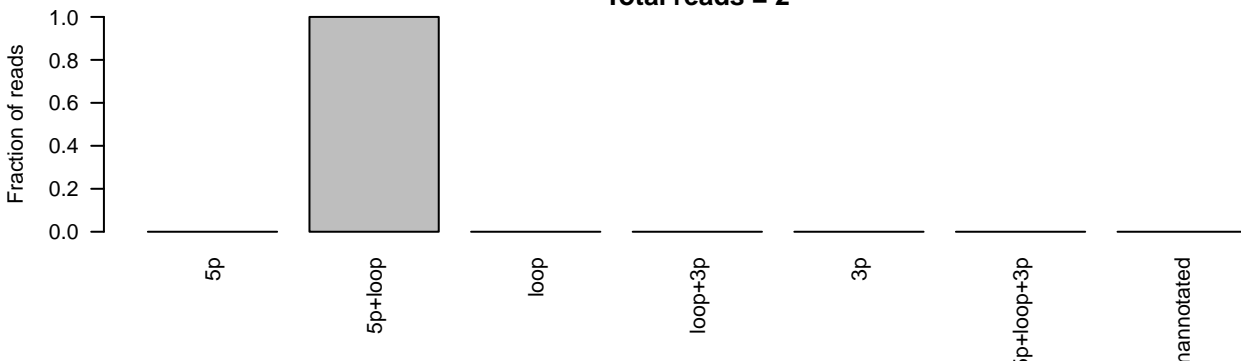

**B) Normal fibroblast miRNA sequencing**  
ID=MI0005566\_1;accession\_number=MI0005566;Name=hsa-mir-374b  
Total reads = 26

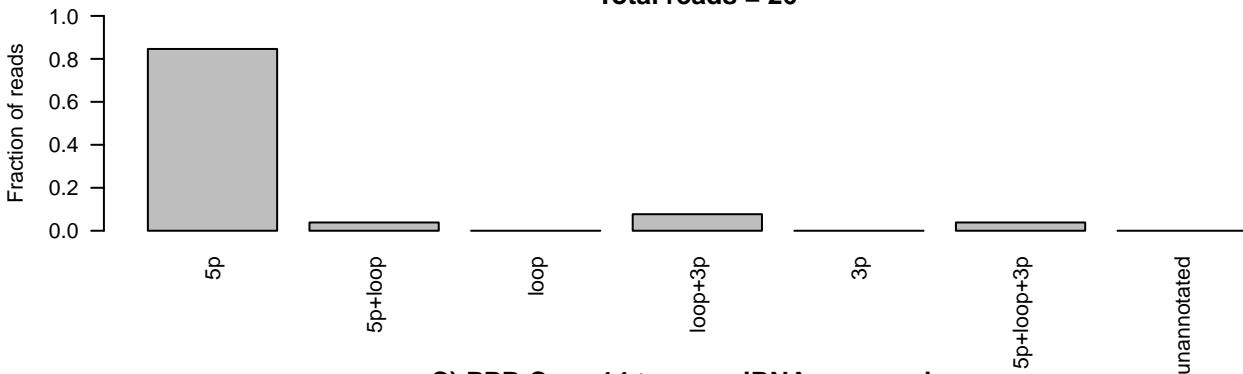

**C) PPB Case 14 tumor miRNA sequencing**  
ID=MI0005566\_1;accession\_number=MI0005566;Name=hsa-mir-374b  
Total reads = 44

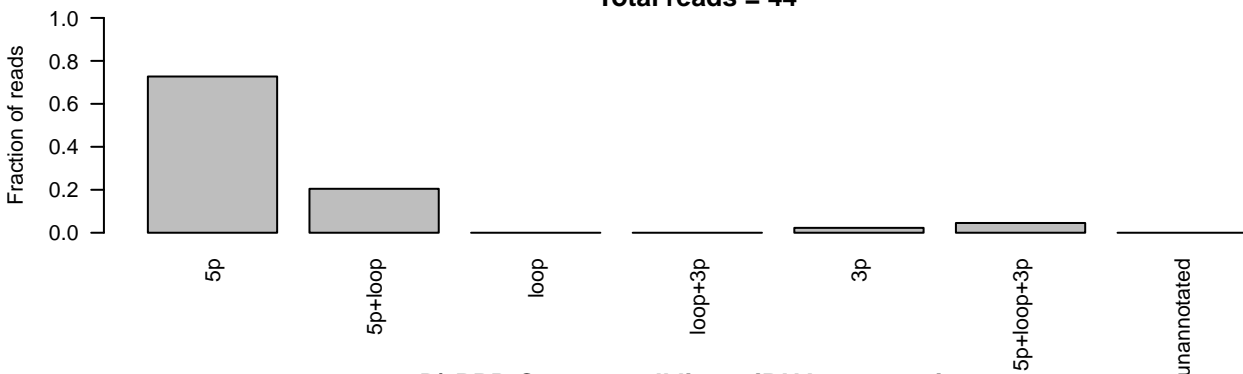

**D) PPB Case 14 cell line miRNA sequencing**  
ID=MI0005566\_1;accession\_number=MI0005566;Name=hsa-mir-374b  
Total reads = 10

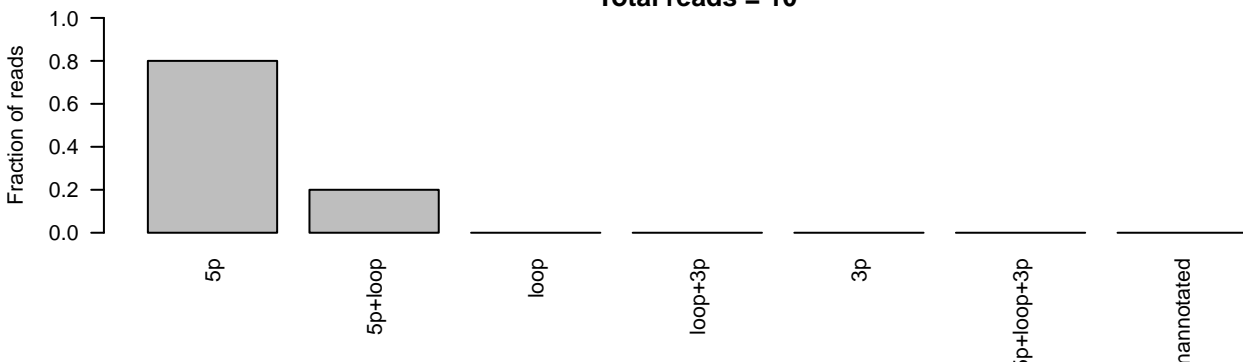

**B) Normal fibroblast miRNA sequencing**  
ID=MI0016684\_1;accession\_number=MI0016684;Name=hsa-mir-374c  
Total reads = 26

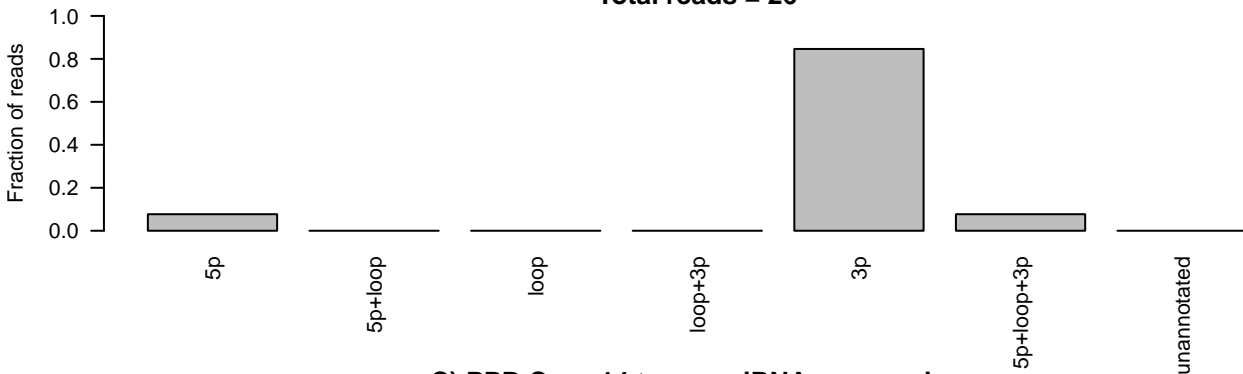

**C) PPB Case 14 tumor miRNA sequencing**  
ID=MI0016684\_1;accession\_number=MI0016684;Name=hsa-mir-374c  
Total reads = 43

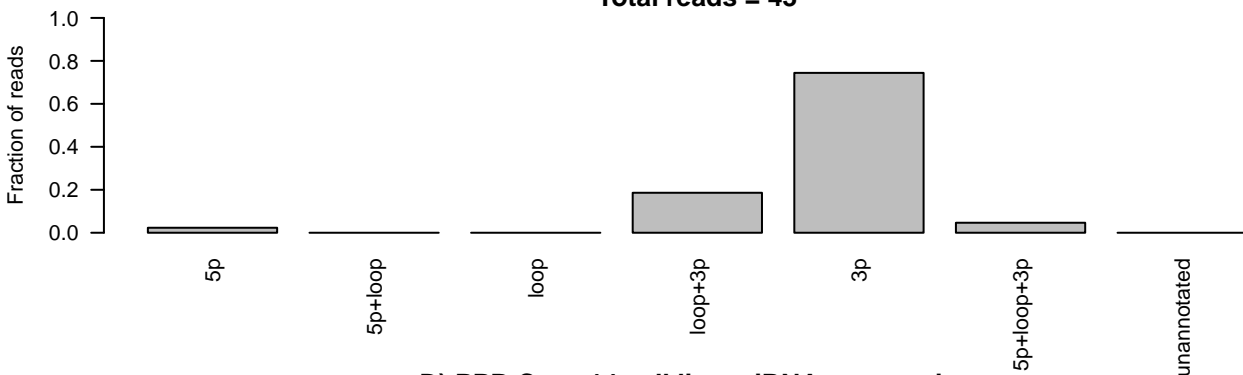

**D) PPB Case 14 cell line miRNA sequencing**  
ID=MI0016684\_1;accession\_number=MI0016684;Name=hsa-mir-374c  
Total reads = 10

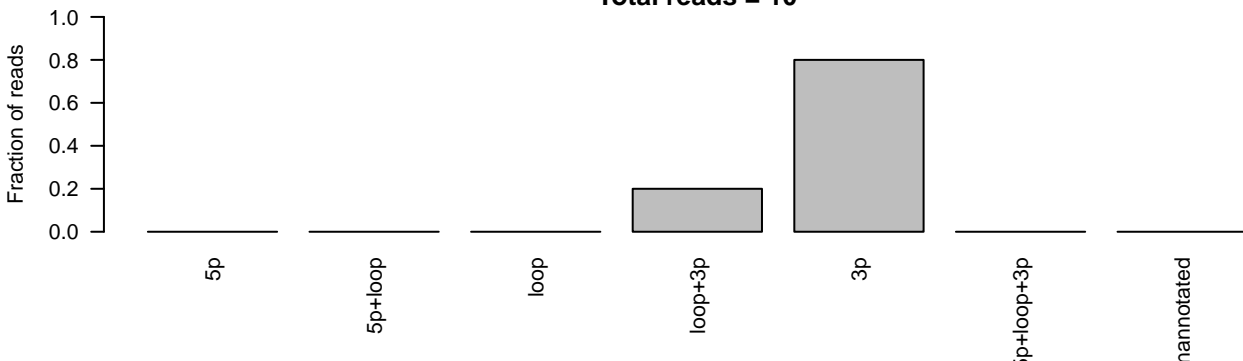

**B) Normal fibroblast miRNA sequencing**  
ID=MI0000815\_1;accession\_number=MI0000815;Name=hsa-mir-339  
Total reads = 25

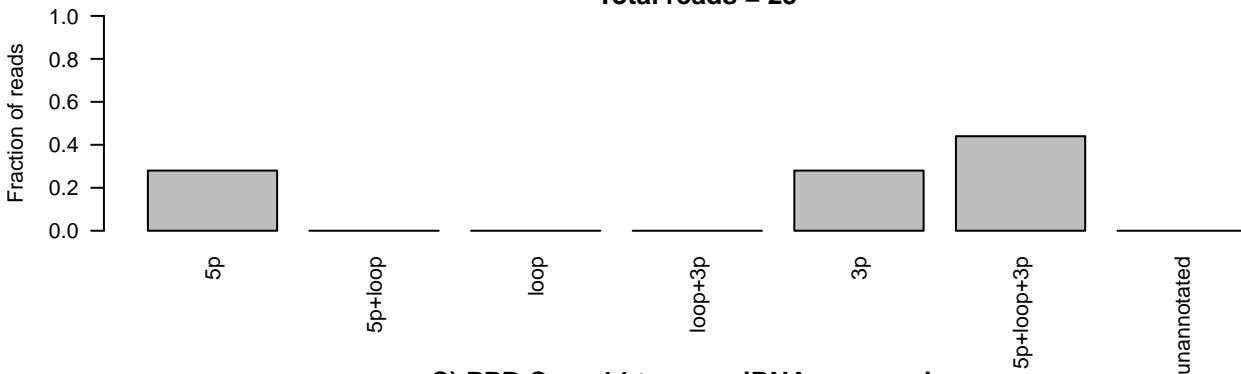

**C) PPB Case 14 tumor miRNA sequencing**  
ID=MI0000815\_1;accession\_number=MI0000815;Name=hsa-mir-339  
Total reads = 31

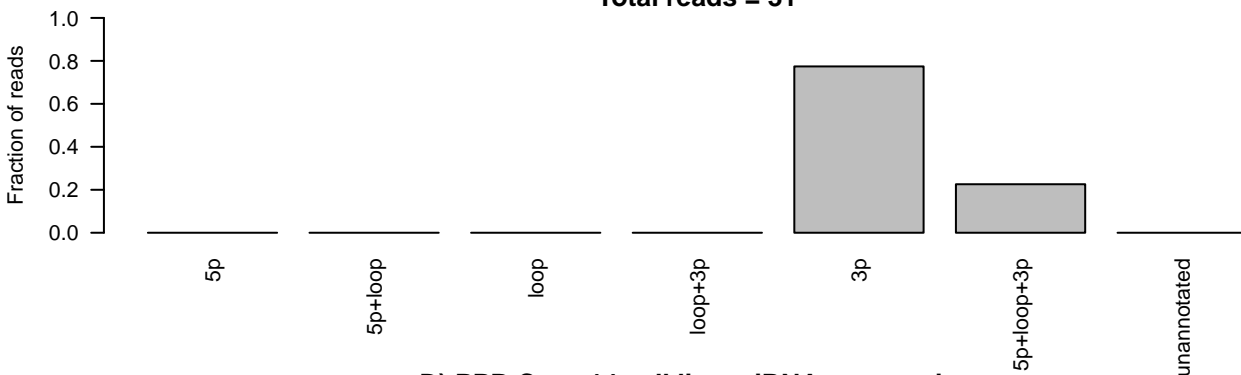

**D) PPB Case 14 cell line miRNA sequencing**  
ID=MI0000815\_1;accession\_number=MI0000815;Name=hsa-mir-339  
Total reads = 5

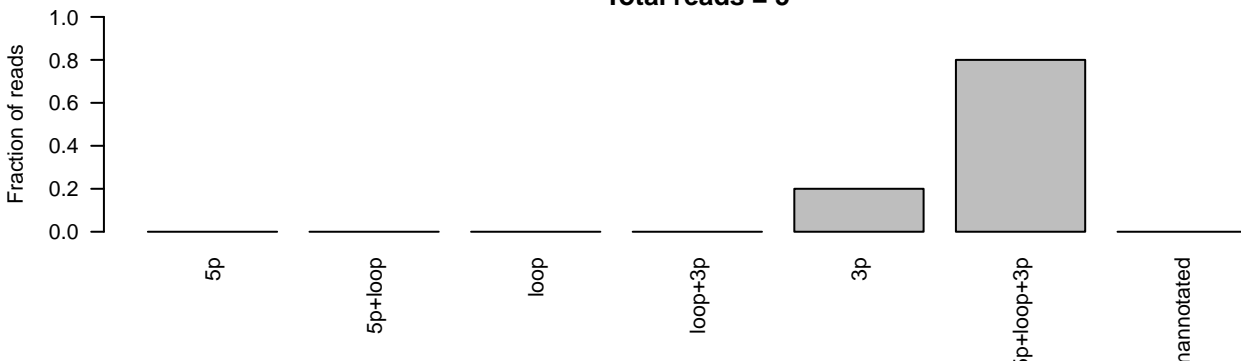



**B) Normal fibroblast miRNA sequencing**  
ID=MI0000105\_1;accession\_number=MI0000105;Name=hsa-mir-29b-1  
Total reads = 24

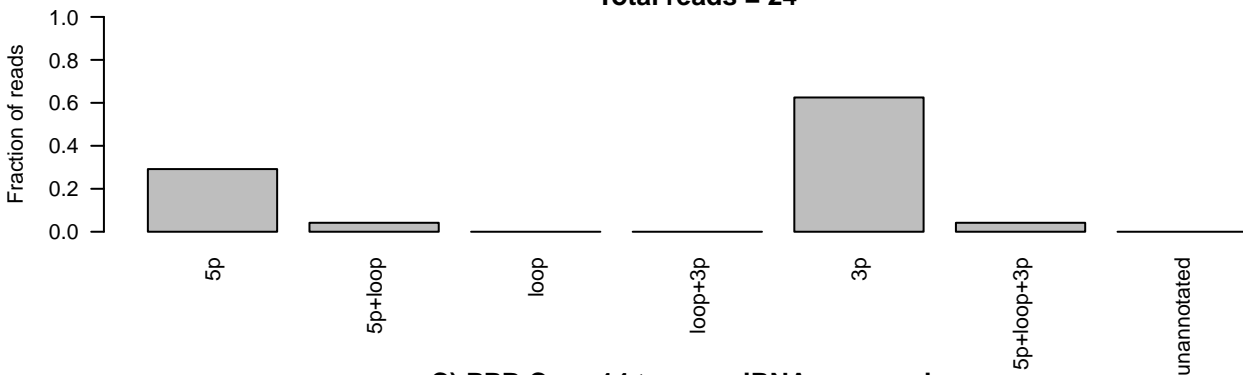

**C) PPB Case 14 tumor miRNA sequencing**  
ID=MI0000105\_1;accession\_number=MI0000105;Name=hsa-mir-29b-1  
Total reads = 2

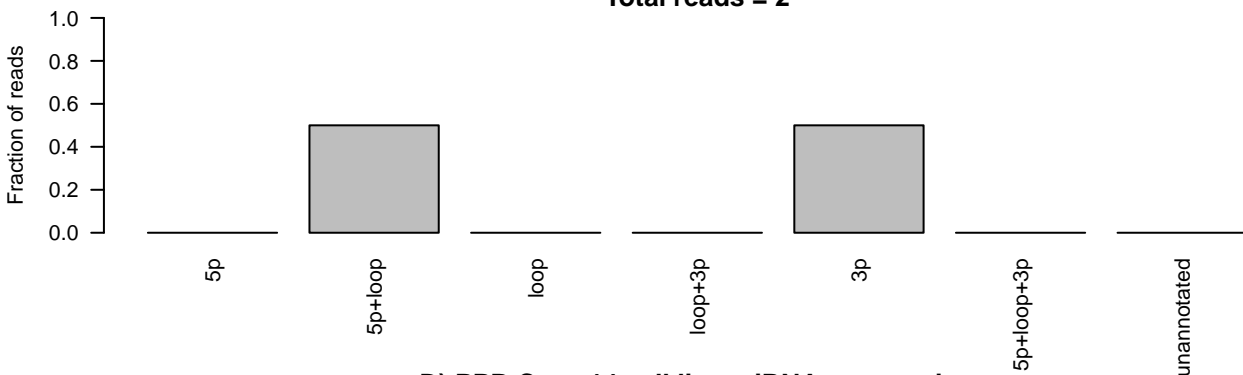

**D) PPB Case 14 cell line miRNA sequencing**  
ID=MI0000105\_1;accession\_number=MI0000105;Name=hsa-mir-29b-1  
Total reads = 20

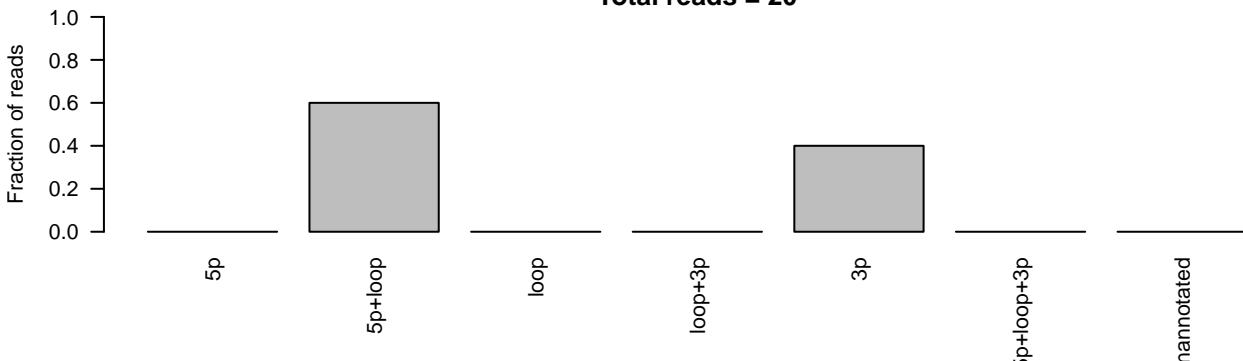

**B) Normal fibroblast miRNA sequencing**  
ID=MI0003132\_1;accession\_number=MI0003132;Name=hsa-mir-493  
Total reads = 23

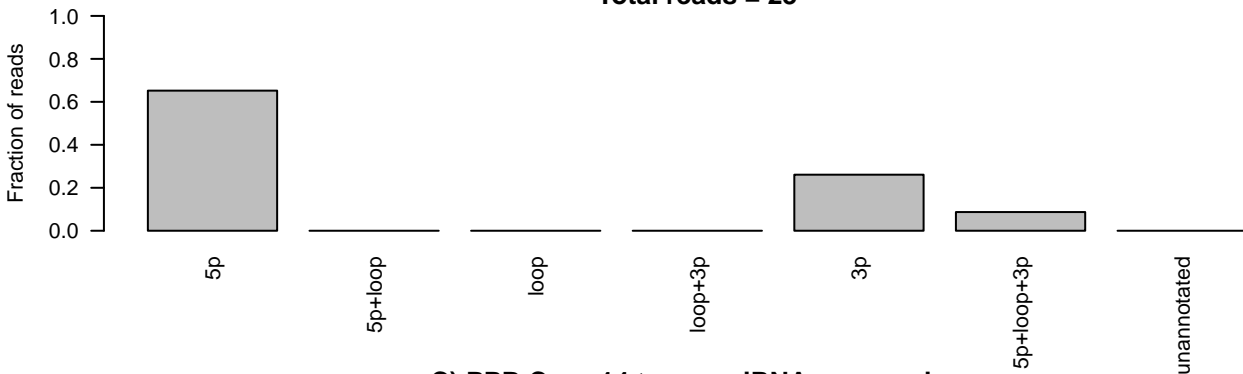

**C) PPB Case 14 tumor miRNA sequencing**  
ID=MI0003132\_1;accession\_number=MI0003132;Name=hsa-mir-493  
Total reads = 150

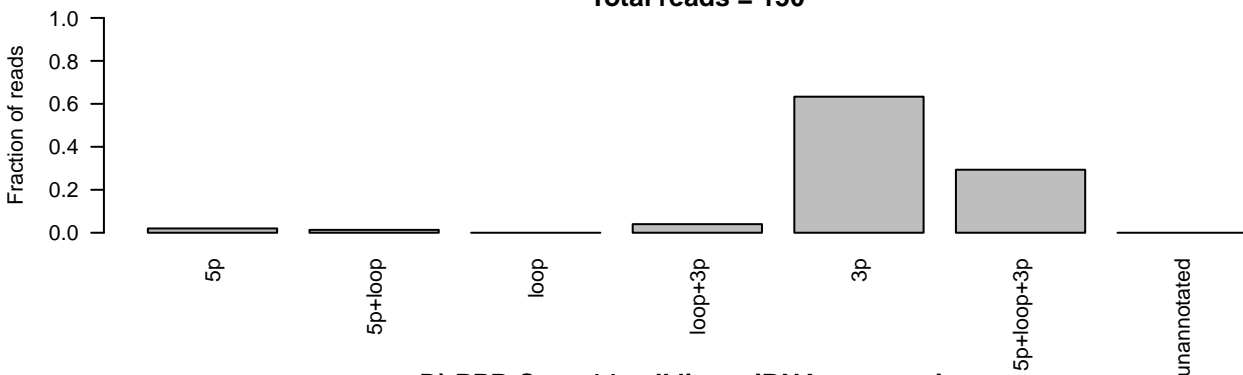

**D) PPB Case 14 cell line miRNA sequencing**  
ID=MI0003132\_1;accession\_number=MI0003132;Name=hsa-mir-493  
Total reads = 35

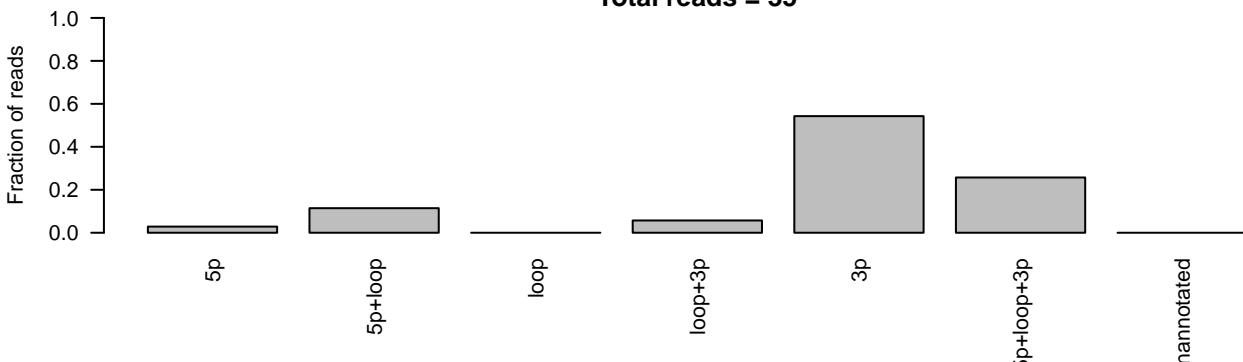

**B) Normal fibroblast miRNA sequencing**  
ID=MI0000482\_1;accession\_number=MI0000482;Name=hsa-mir-185  
Total reads = 23

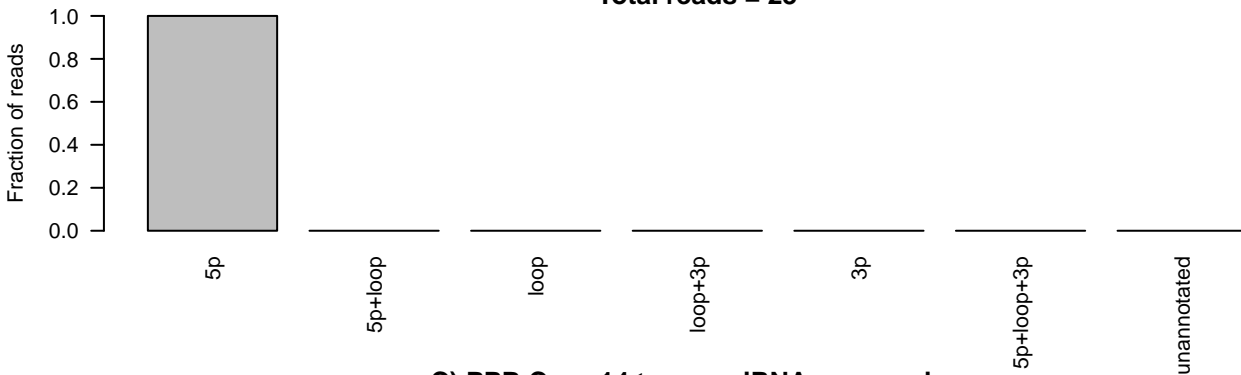

**C) PPB Case 14 tumor miRNA sequencing**  
ID=MI0000482\_1;accession\_number=MI0000482;Name=hsa-mir-185  
Total reads = 5

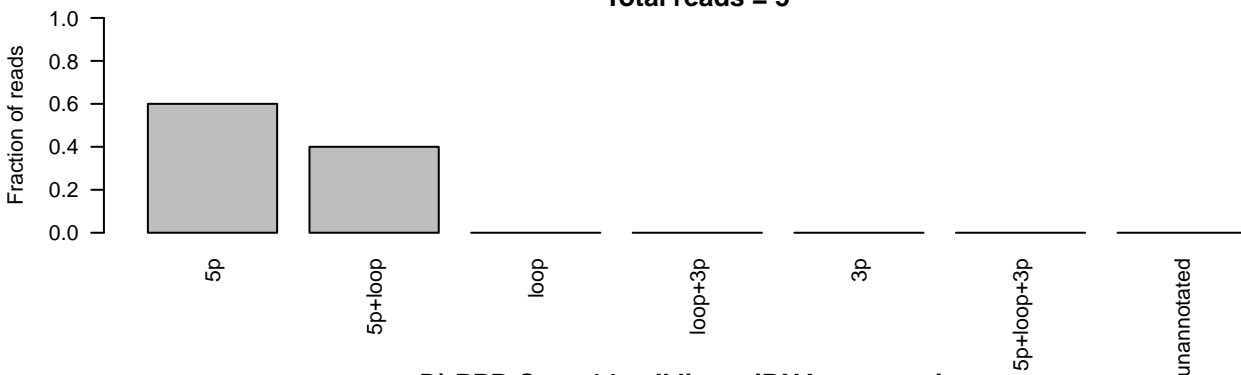

**D) PPB Case 14 cell line miRNA sequencing**  
ID=MI0000482\_1;accession\_number=MI0000482;Name=hsa-mir-185  
Total reads = 1

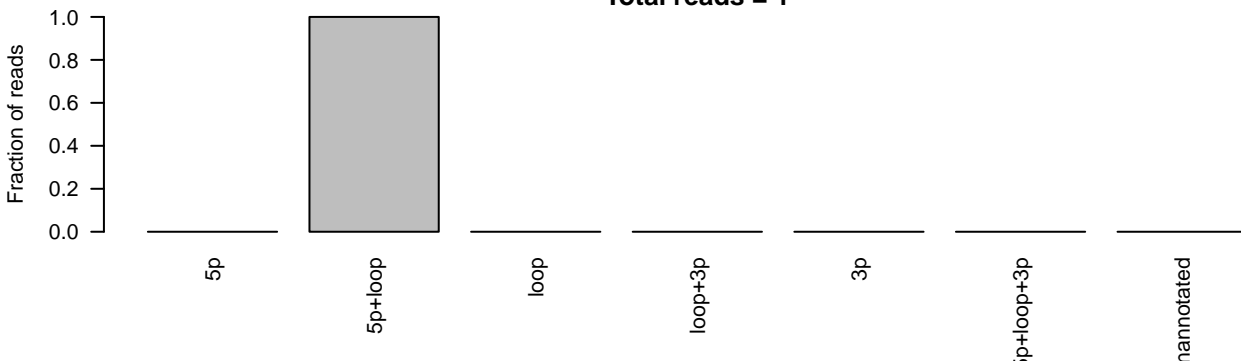

**B) Normal fibroblast miRNA sequencing**  
ID=MI0000476\_1;accession\_number=MI0000476;Name=hsa-mir-138-1  
Total reads = 40

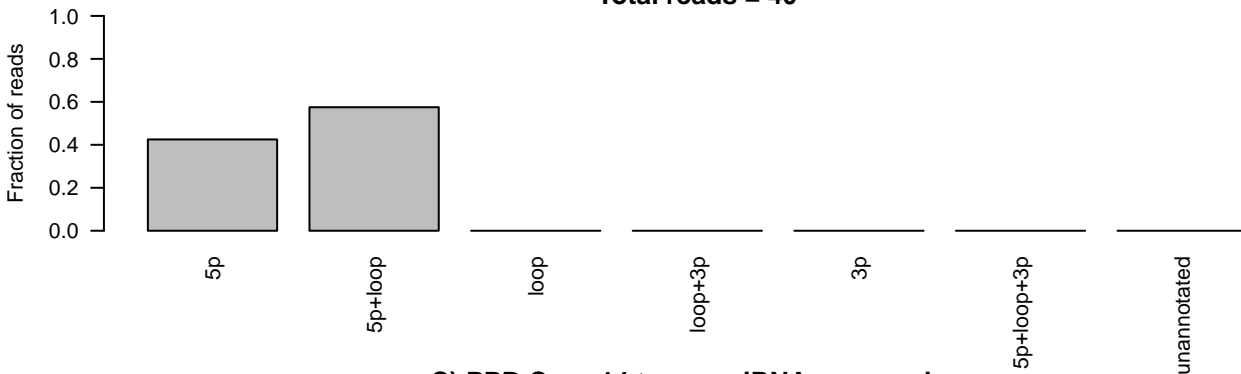

**C) PPB Case 14 tumor miRNA sequencing**  
ID=MI0000476\_1;accession\_number=MI0000476;Name=hsa-mir-138-1  
Total reads = 12

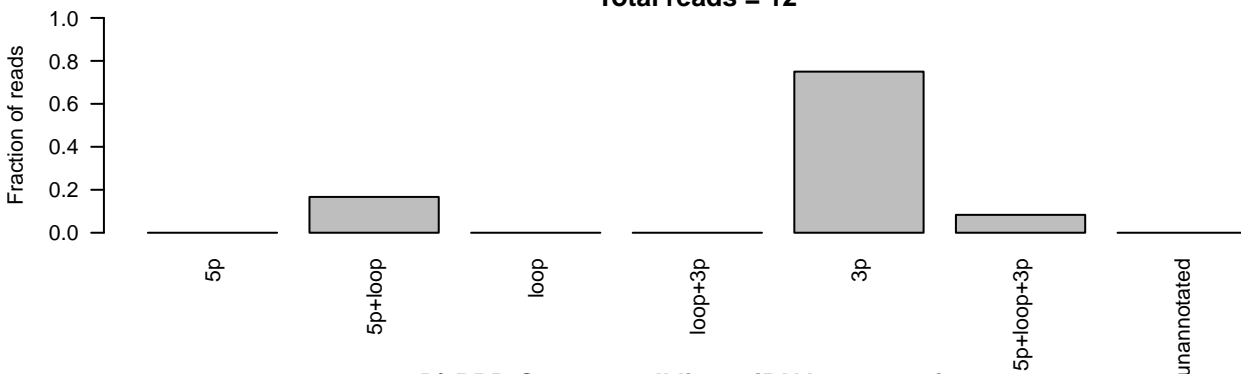

**D) PPB Case 14 cell line miRNA sequencing**  
ID=MI0000476\_1;accession\_number=MI0000476;Name=hsa-mir-138-1  
Total reads = 7

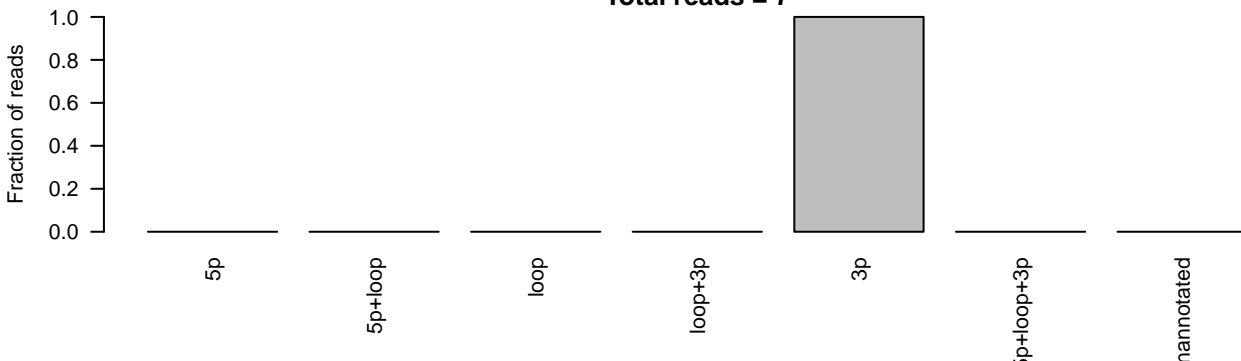

**B) Normal fibroblast miRNA sequencing**  
ID=MI0003667\_1;accession\_number=MI0003667;Name=hsa-mir-652  
Total reads = 23

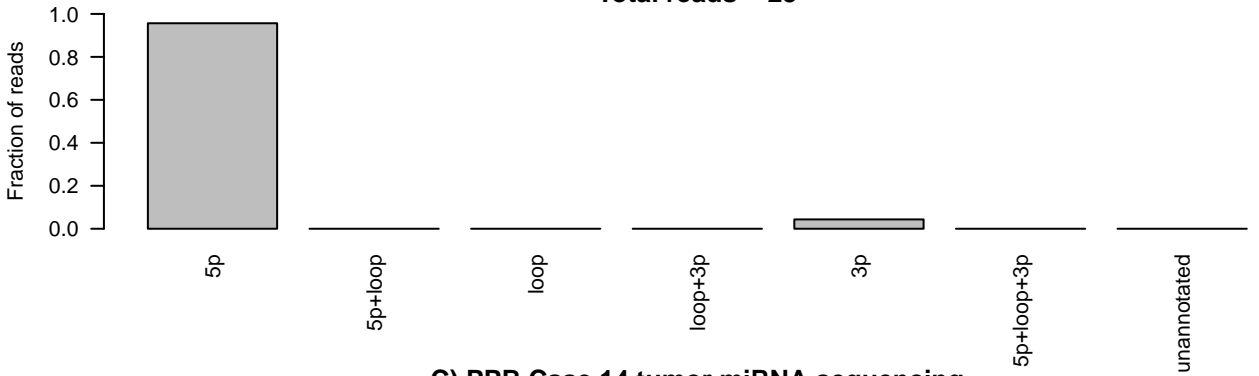

**C) PPB Case 14 tumor miRNA sequencing**  
ID=MI0003667\_1;accession\_number=MI0003667;Name=hsa-mir-652  
Total reads = 3

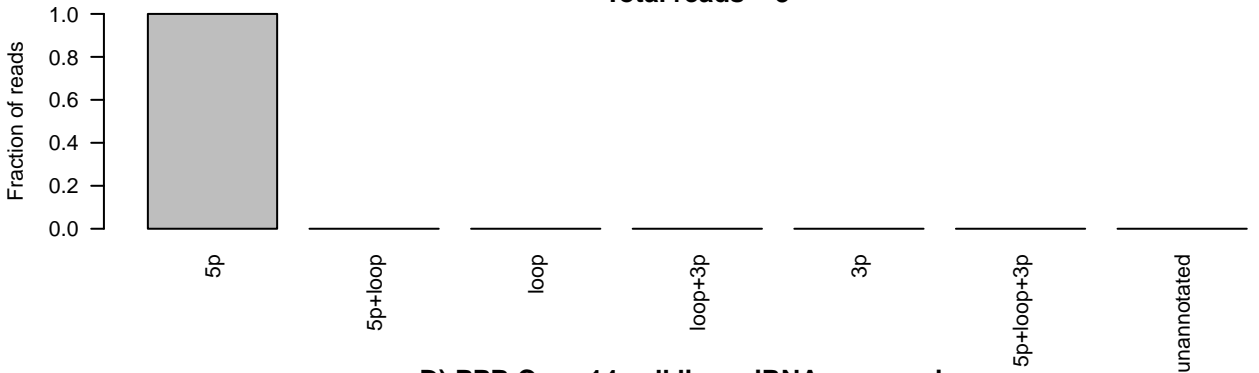

**D) PPB Case 14 cell line miRNA sequencing**  
ID=MI0003667\_1;accession\_number=MI0003667;Name=hsa-mir-652  
Total reads = 0

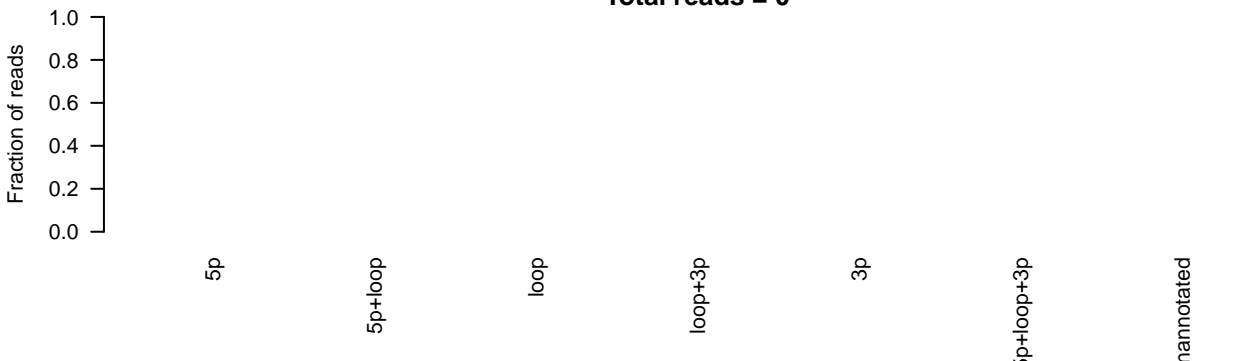

**B) Normal fibroblast miRNA sequencing**  
ID=MI0000475\_1;accession\_number=MI0000475;Name=hsa-mir-136  
Total reads = 21

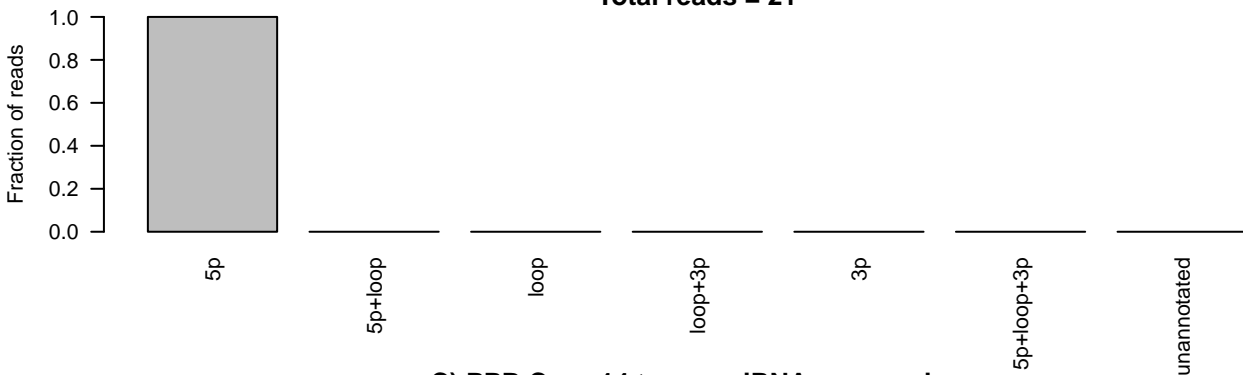

**C) PPB Case 14 tumor miRNA sequencing**  
ID=MI0000475\_1;accession\_number=MI0000475;Name=hsa-mir-136  
Total reads = 18

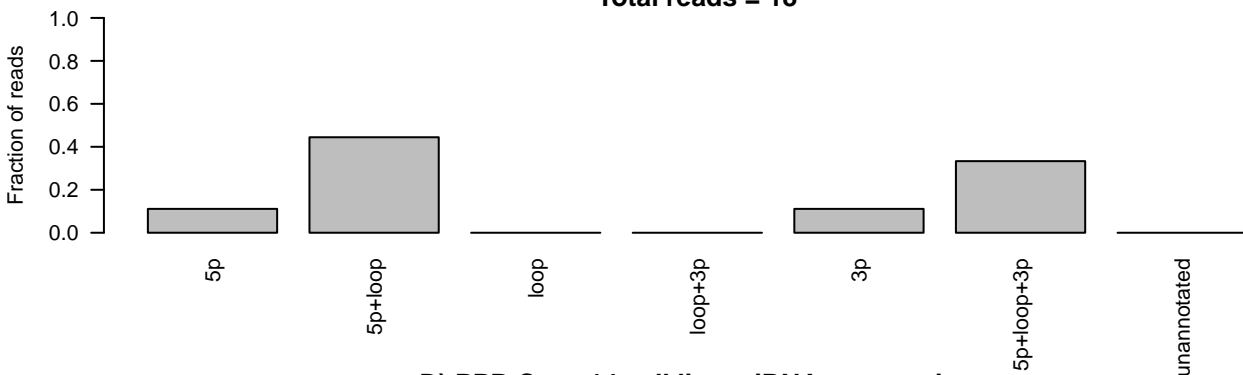

**D) PPB Case 14 cell line miRNA sequencing**  
ID=MI0000475\_1;accession\_number=MI0000475;Name=hsa-mir-136  
Total reads = 5



**B) Normal fibroblast miRNA sequencing**  
ID=MI0000480\_1;accession\_number=MI0000480;Name=hsa-mir-154  
Total reads = 21

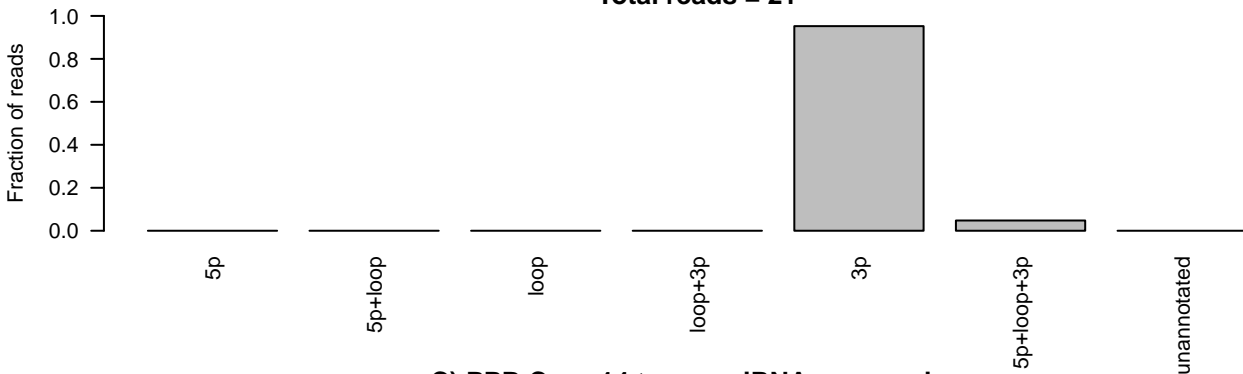

**C) PPB Case 14 tumor miRNA sequencing**  
ID=MI0000480\_1;accession\_number=MI0000480;Name=hsa-mir-154  
Total reads = 179

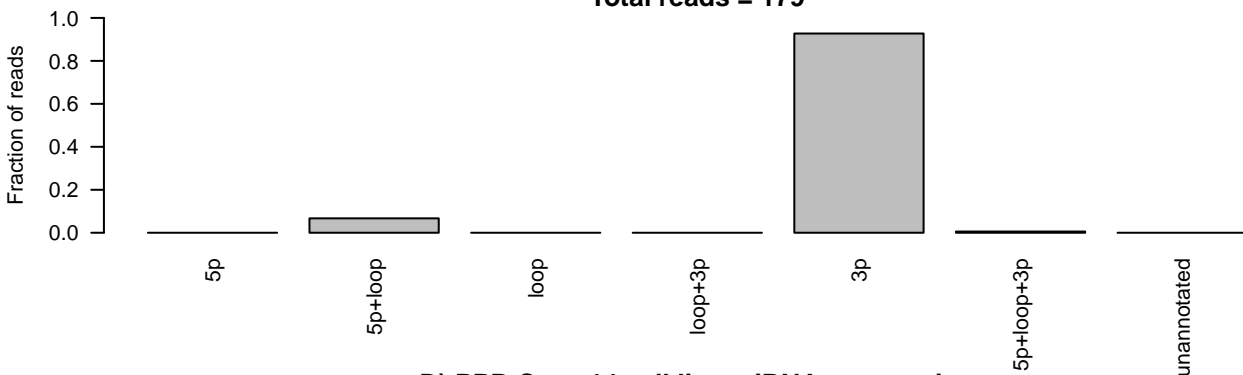

**D) PPB Case 14 cell line miRNA sequencing**  
ID=MI0000480\_1;accession\_number=MI0000480;Name=hsa-mir-154  
Total reads = 27

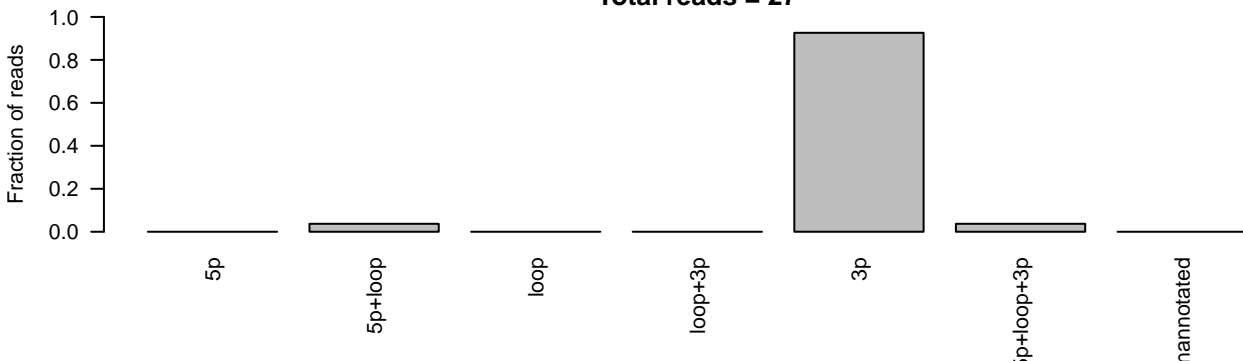

**B) Normal fibroblast miRNA sequencing**  
ID=MI0000265\_1;accession\_number=MI0000265;Name=hsa-mir-7-3  
Total reads = 20

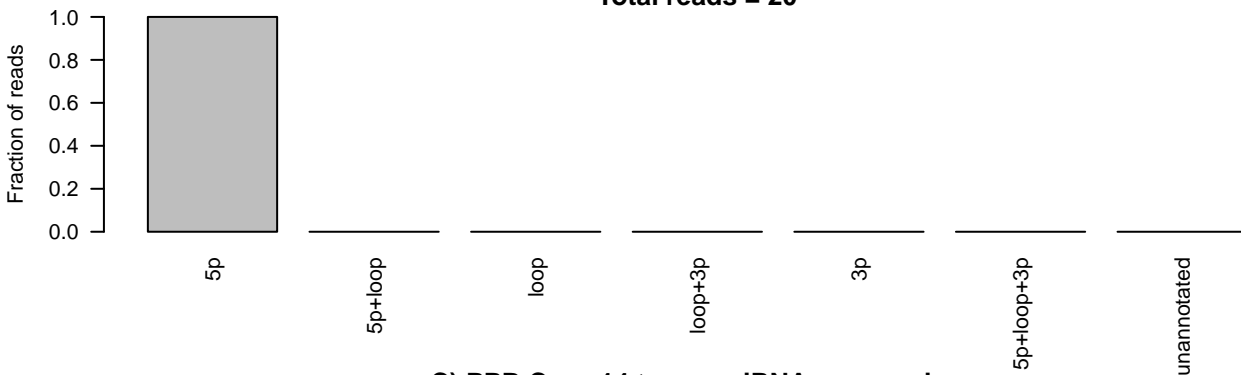

**C) PPB Case 14 tumor miRNA sequencing**  
ID=MI0000265\_1;accession\_number=MI0000265;Name=hsa-mir-7-3  
Total reads = 1

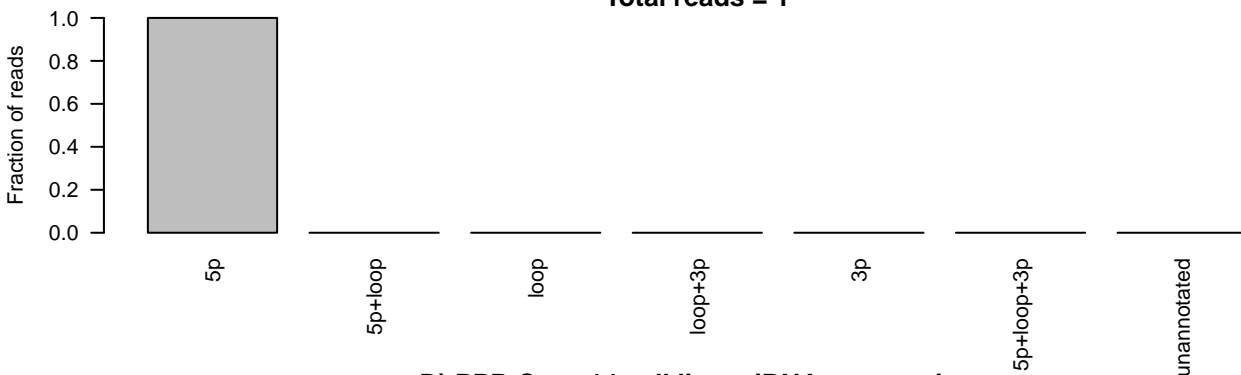

**D) PPB Case 14 cell line miRNA sequencing**  
ID=MI0000265\_1;accession\_number=MI0000265;Name=hsa-mir-7-3  
Total reads = 0

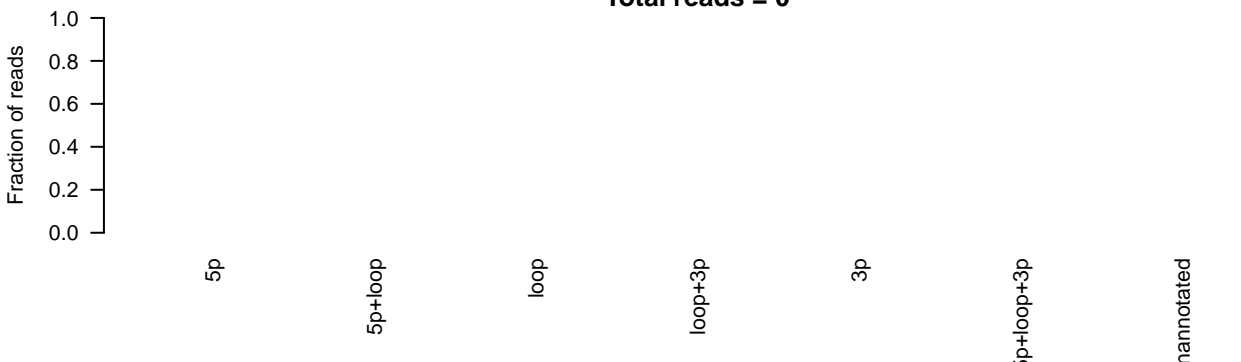



**B) Normal fibroblast miRNA sequencing**  
ID=MI0000271\_1;accession\_number=MI0000271;Name=hsa-mir-181c  
Total reads = 21

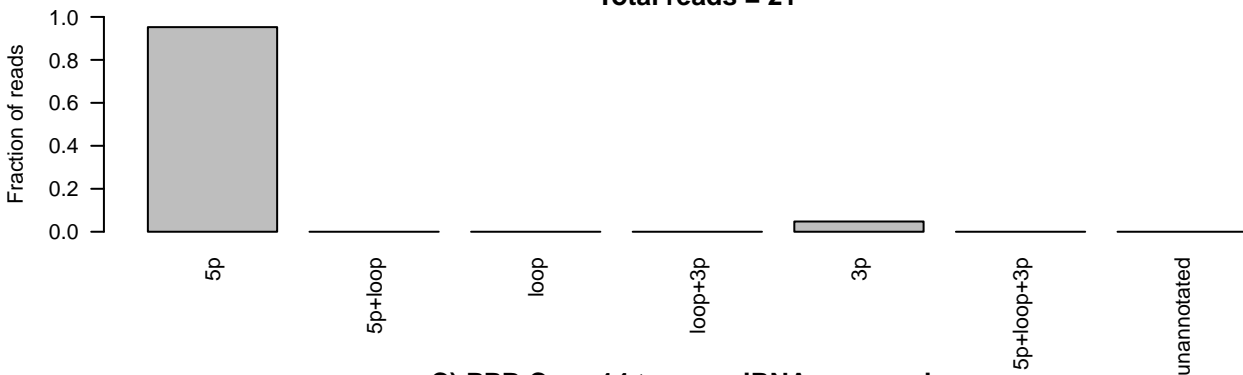

**C) PPB Case 14 tumor miRNA sequencing**  
ID=MI0000271\_1;accession\_number=MI0000271;Name=hsa-mir-181c  
Total reads = 4

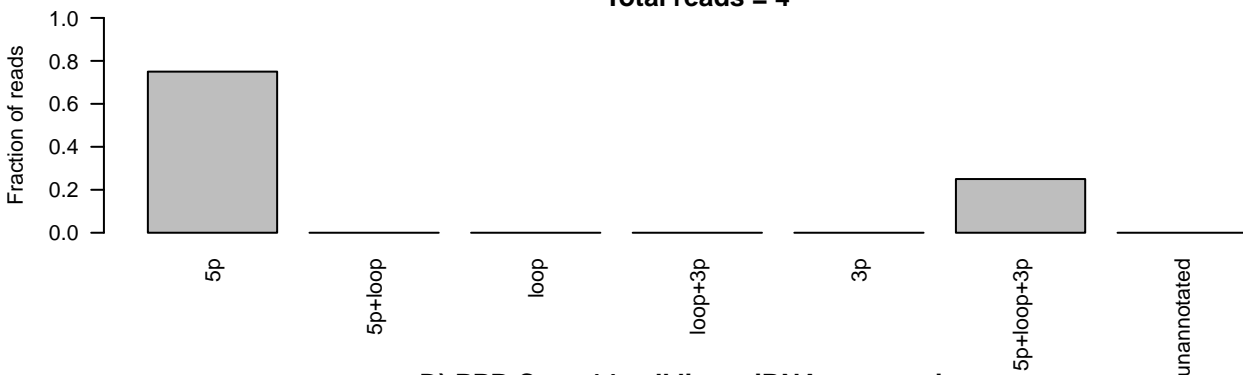

**D) PPB Case 14 cell line miRNA sequencing**  
ID=MI0000271\_1;accession\_number=MI0000271;Name=hsa-mir-181c  
Total reads = 0



**B) Normal fibroblast miRNA sequencing**  
ID=MI0000253\_1;accession\_number=MI0000253;Name=hsa-mir-148a  
Total reads = 21

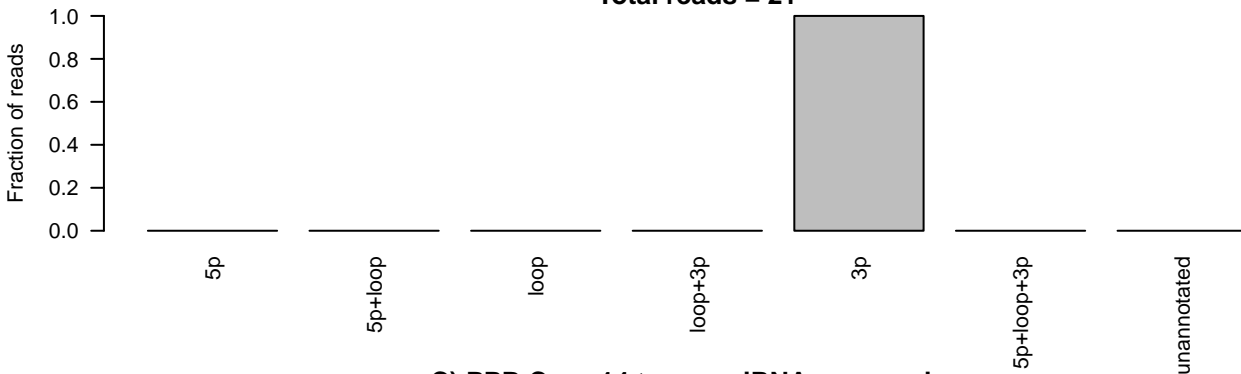

**C) PPB Case 14 tumor miRNA sequencing**  
ID=MI0000253\_1;accession\_number=MI0000253;Name=hsa-mir-148a  
Total reads = 231

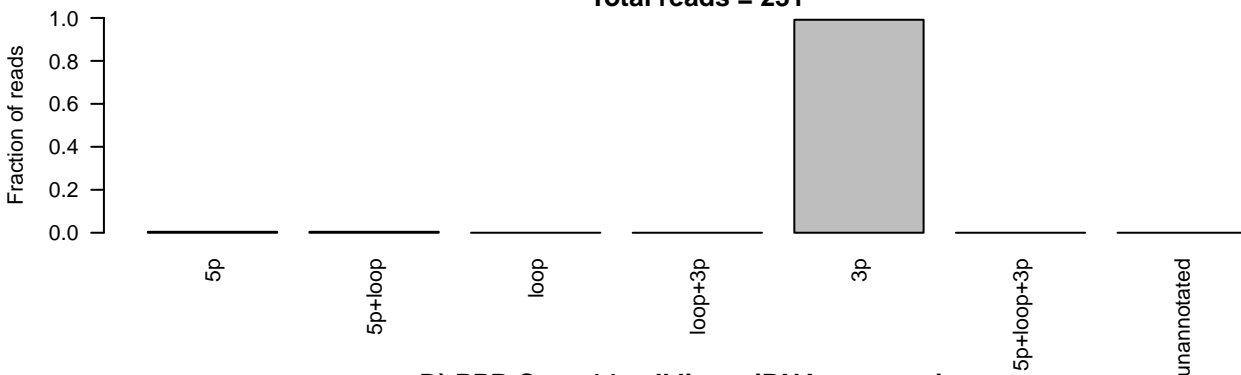

**D) PPB Case 14 cell line miRNA sequencing**  
ID=MI0000253\_1;accession\_number=MI0000253;Name=hsa-mir-148a  
Total reads = 6

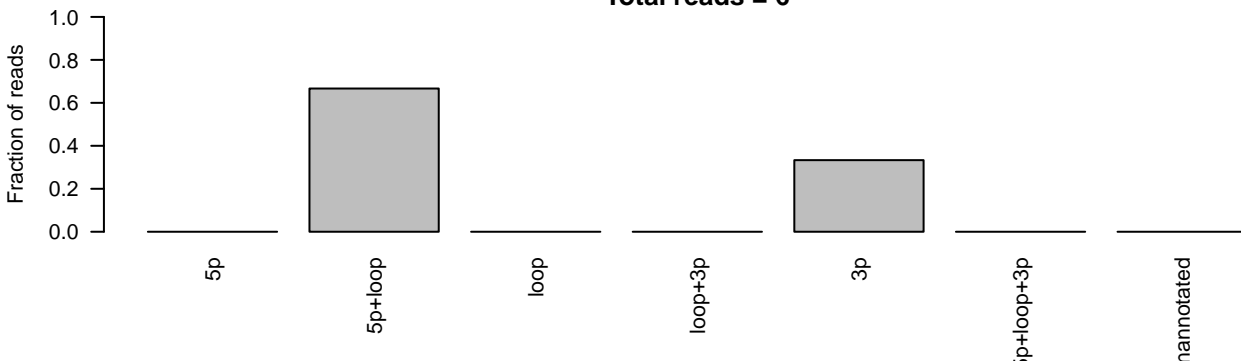

**B) Normal fibroblast miRNA sequencing**  
ID=MI0016008\_1;accession\_number=MI0016008;Name=hsa-mir-3618  
Total reads = 0



**C) PPB Case 14 tumor miRNA sequencing**  
ID=MI0016008\_1;accession\_number=MI0016008;Name=hsa-mir-3618  
Total reads = 0



**D) PPB Case 14 cell line miRNA sequencing**  
ID=MI0016008\_1;accession\_number=MI0016008;Name=hsa-mir-3618  
Total reads = 0



**B) Normal fibroblast miRNA sequencing**  
ID=MI0005562\_1;accession\_number=MI0005562;Name=hsa-mir-887  
Total reads = 18

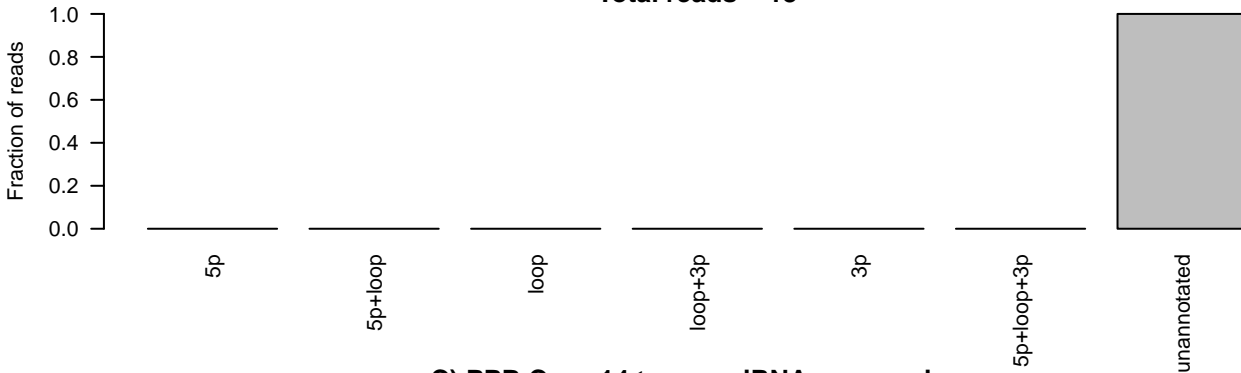

**C) PPB Case 14 tumor miRNA sequencing**  
ID=MI0005562\_1;accession\_number=MI0005562;Name=hsa-mir-887  
Total reads = 15

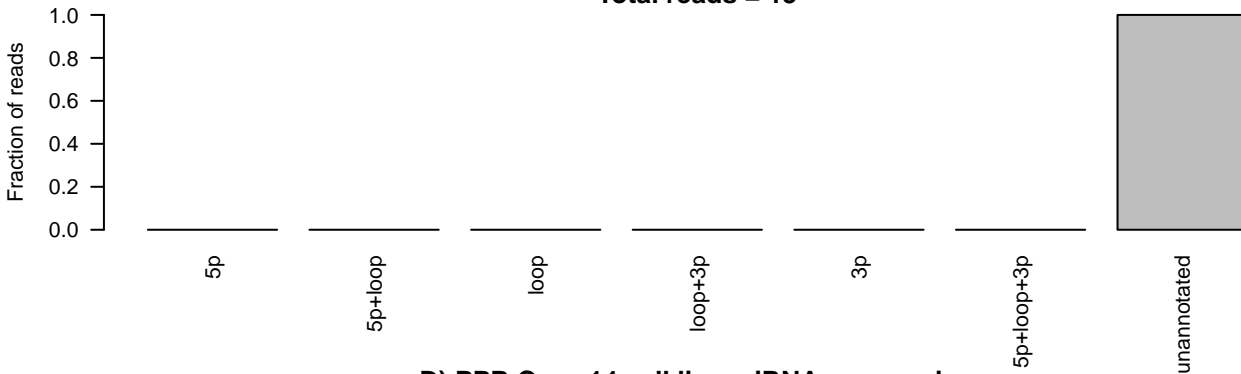

**D) PPB Case 14 cell line miRNA sequencing**  
ID=MI0005562\_1;accession\_number=MI0005562;Name=hsa-mir-887  
Total reads = 0



**B) Normal fibroblast miRNA sequencing**  
ID=MI0000088\_1;accession\_number=MI0000088;Name=hsa-mir-30a  
Total reads = 20

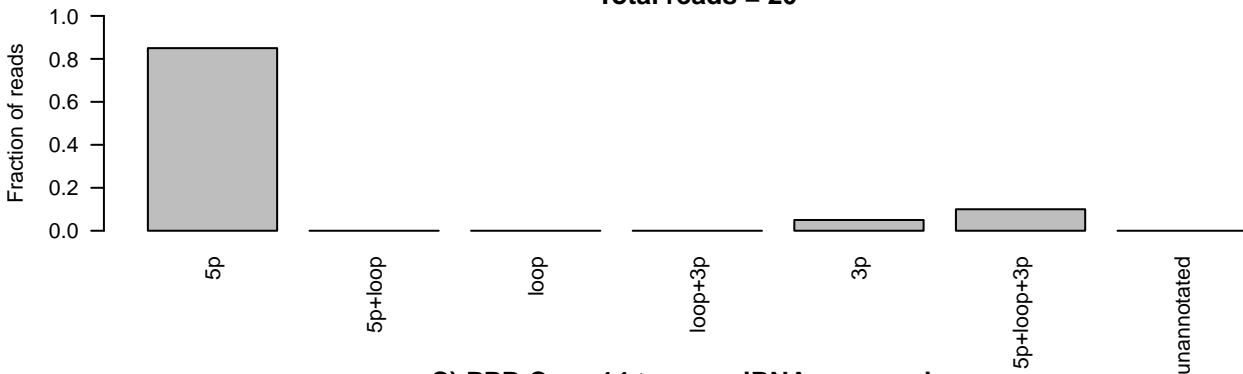

**C) PPB Case 14 tumor miRNA sequencing**  
ID=MI0000088\_1;accession\_number=MI0000088;Name=hsa-mir-30a  
Total reads = 3

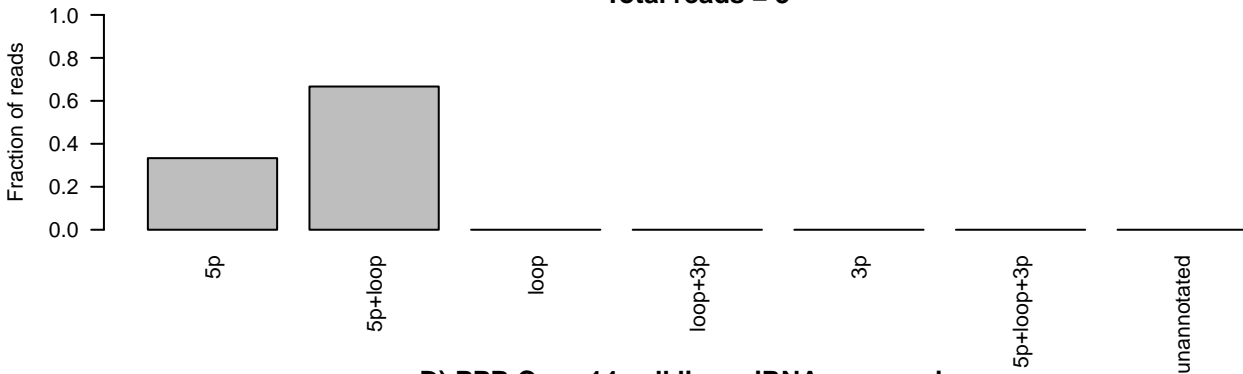

**D) PPB Case 14 cell line miRNA sequencing**  
ID=MI0000088\_1;accession\_number=MI0000088;Name=hsa-mir-30a  
Total reads = 6

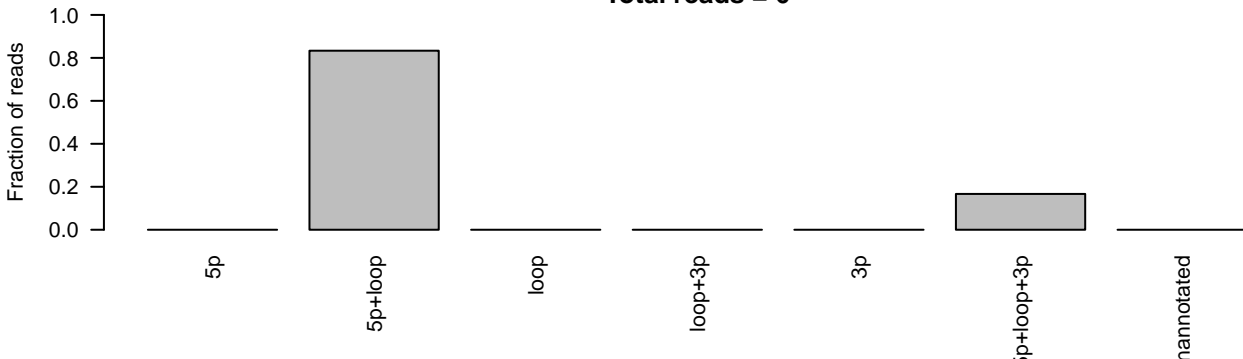

**B) Normal fibroblast miRNA sequencing**  
ID=MI0000281\_1;accession\_number=MI0000281;Name=hsa-mir-199a-2  
Total reads = 19

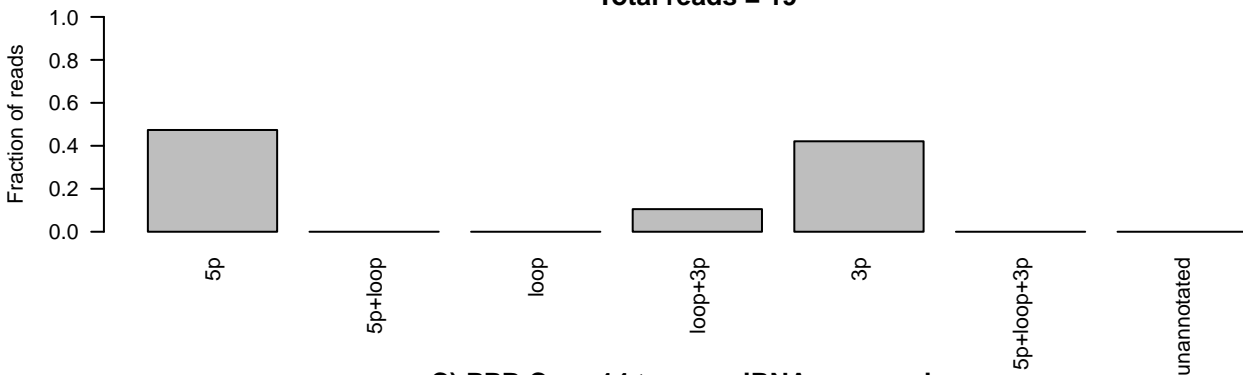

**C) PPB Case 14 tumor miRNA sequencing**  
ID=MI0000281\_1;accession\_number=MI0000281;Name=hsa-mir-199a-2  
Total reads = 55

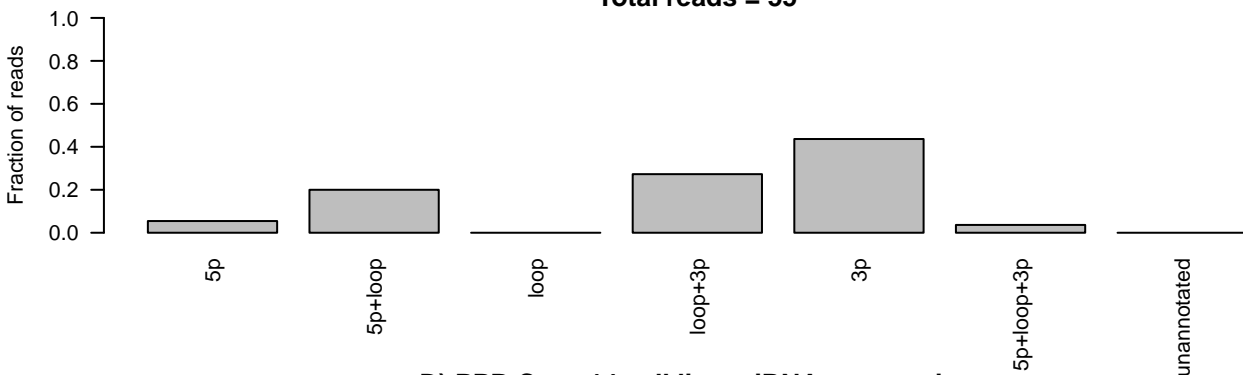

**D) PPB Case 14 cell line miRNA sequencing**  
ID=MI0000281\_1;accession\_number=MI0000281;Name=hsa-mir-199a-2  
Total reads = 10

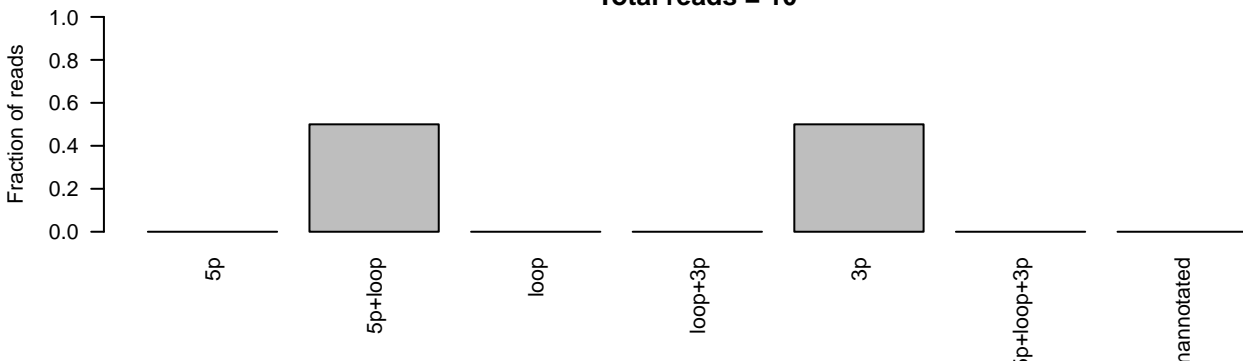

**B) Normal fibroblast miRNA sequencing**  
ID=MI0000448\_1;accession\_number=MI0000448;Name=hsa-mir-130a  
Total reads = 18

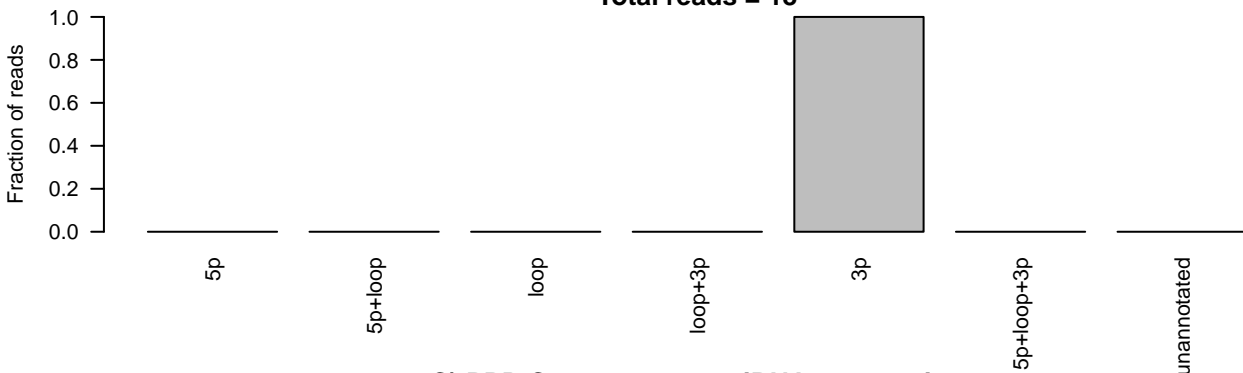

**C) PPB Case 14 tumor miRNA sequencing**  
ID=MI0000448\_1;accession\_number=MI0000448;Name=hsa-mir-130a  
Total reads = 29

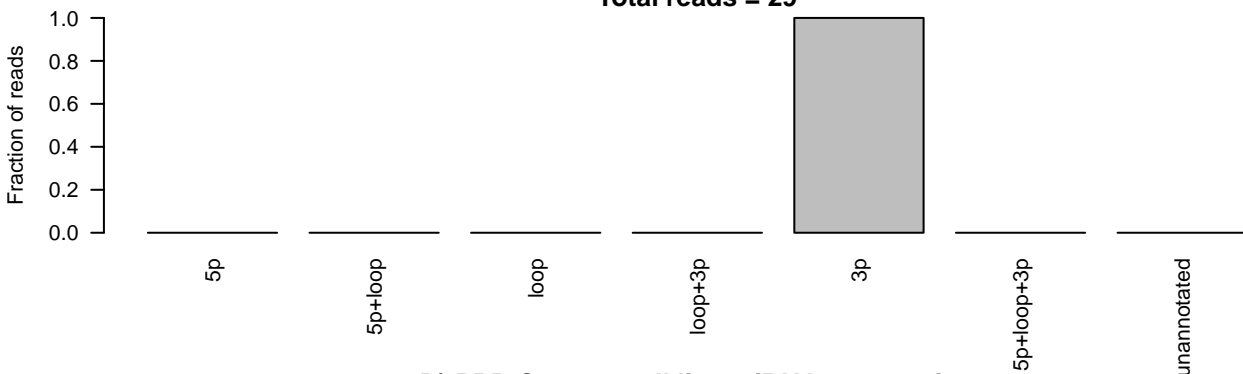

**D) PPB Case 14 cell line miRNA sequencing**  
ID=MI0000448\_1;accession\_number=MI0000448;Name=hsa-mir-130a  
Total reads = 14

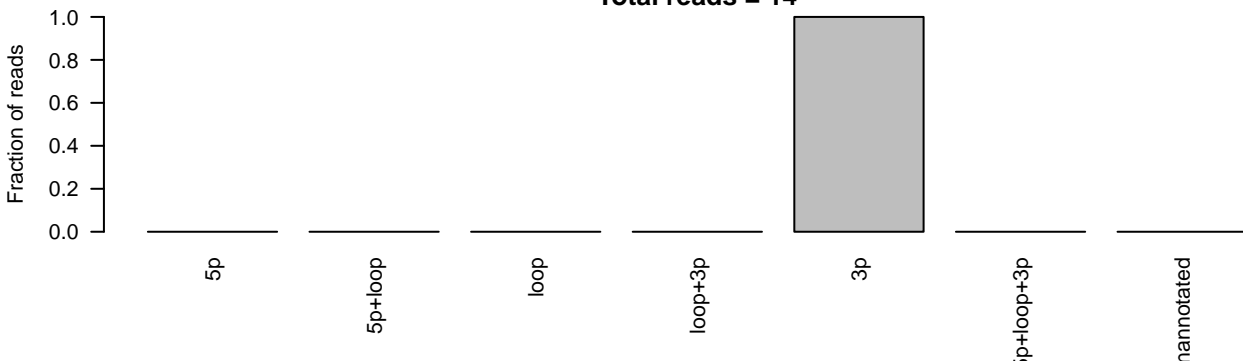

**B) Normal fibroblast miRNA sequencing**  
ID=MI0000115\_1;accession\_number=MI0000115;Name=hsa-mir-16-2  
Total reads = 21

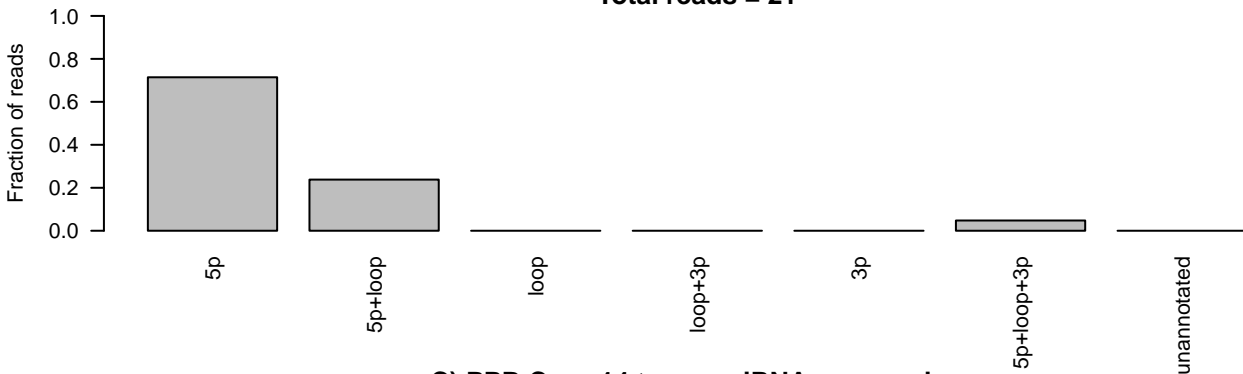

**C) PPB Case 14 tumor miRNA sequencing**  
ID=MI0000115\_1;accession\_number=MI0000115;Name=hsa-mir-16-2  
Total reads = 55

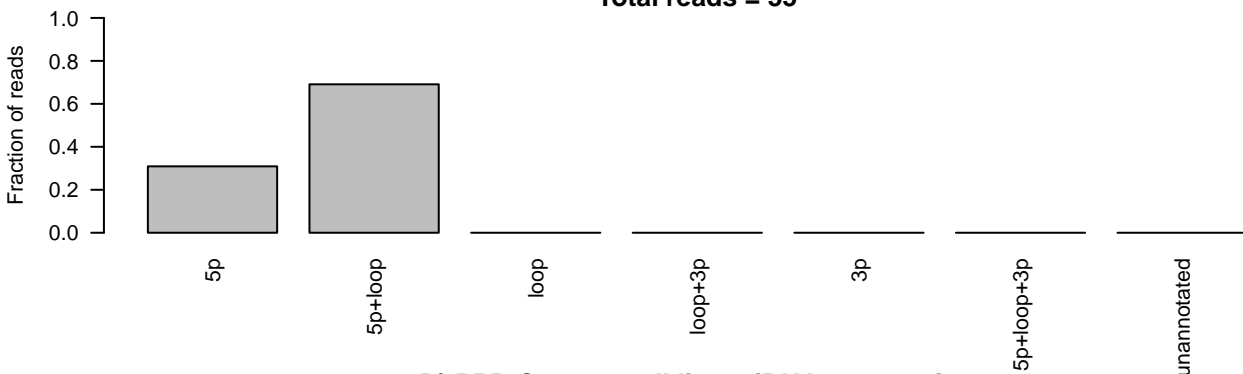

**D) PPB Case 14 cell line miRNA sequencing**  
ID=MI0000115\_1;accession\_number=MI0000115;Name=hsa-mir-16-2  
Total reads = 22

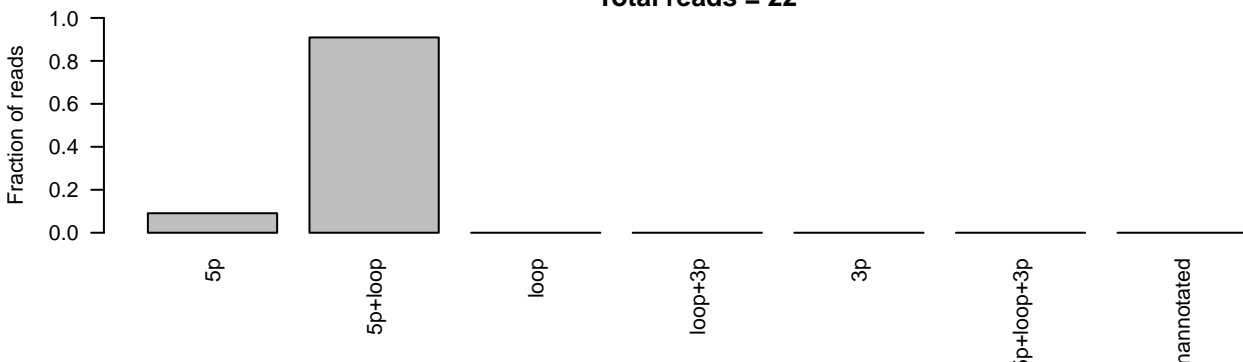



**B) Normal fibroblast miRNA sequencing**  
ID=MI0000739\_1;accession\_number=MI0000739;Name=hsa-mir-101-2  
Total reads = 19

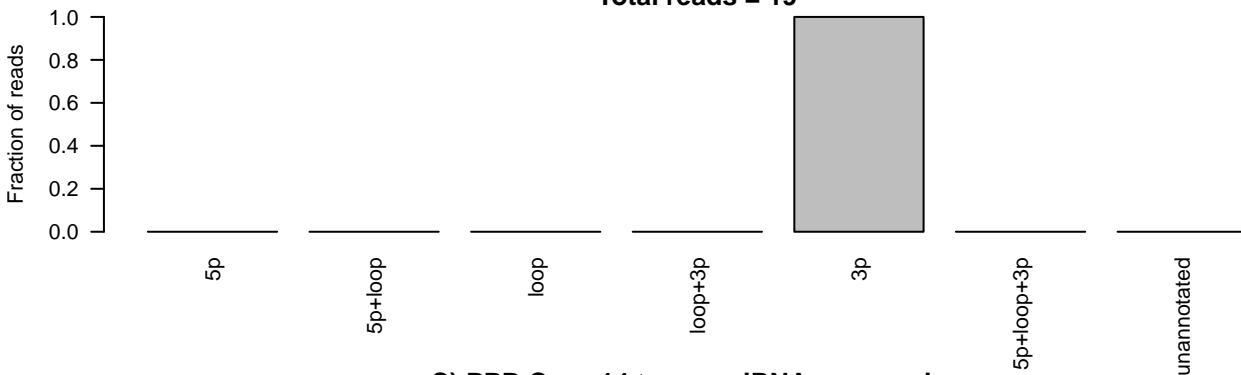

**C) PPB Case 14 tumor miRNA sequencing**  
ID=MI0000739\_1;accession\_number=MI0000739;Name=hsa-mir-101-2  
Total reads = 52

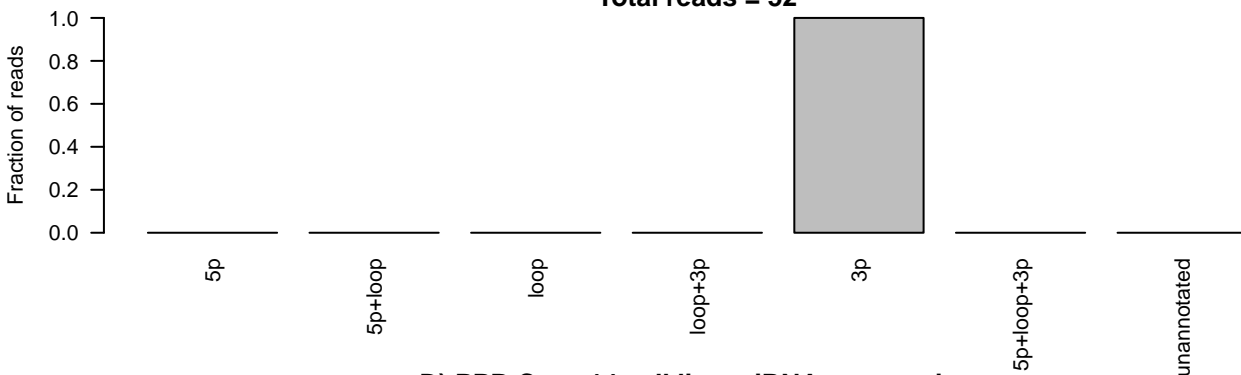

**D) PPB Case 14 cell line miRNA sequencing**  
ID=MI0000739\_1;accession\_number=MI0000739;Name=hsa-mir-101-2  
Total reads = 7

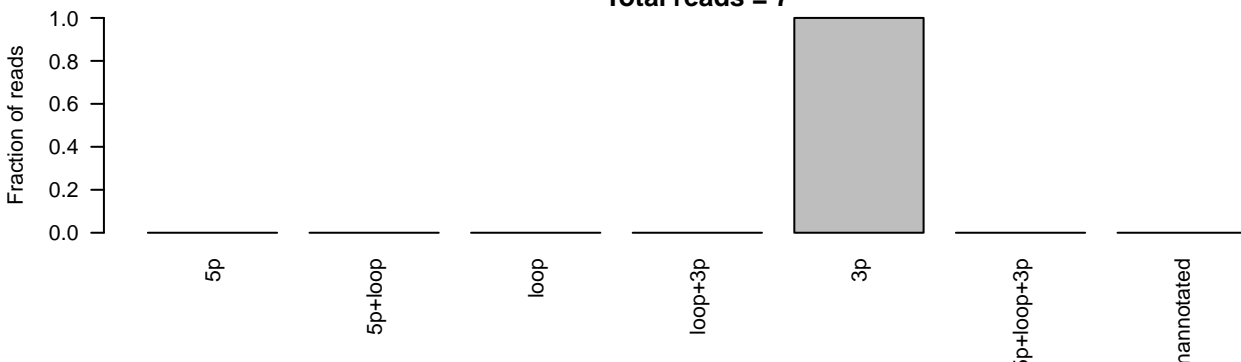

**B) Normal fibroblast miRNA sequencing**  
ID=MI0000068\_1;accession\_number=MI0000068;Name=hsa-let-7f-2  
Total reads = 18

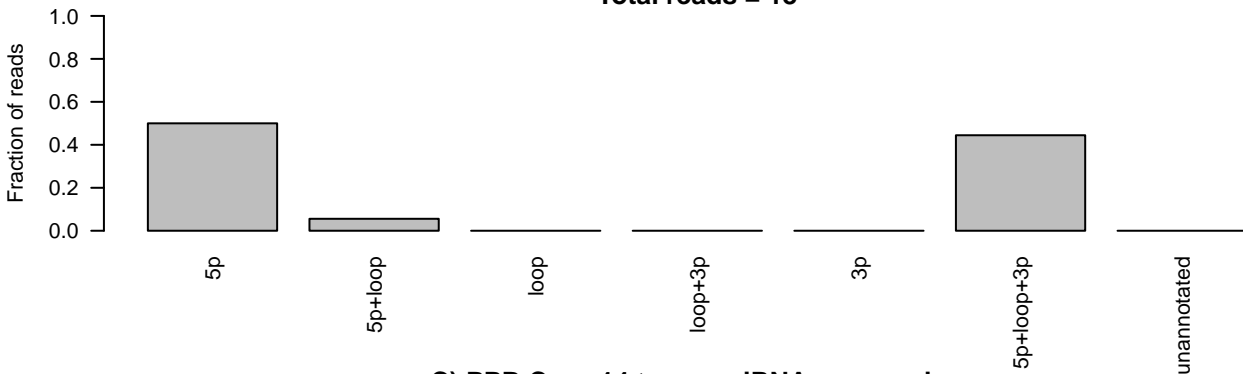

**C) PPB Case 14 tumor miRNA sequencing**  
ID=MI0000068\_1;accession\_number=MI0000068;Name=hsa-let-7f-2  
Total reads = 30

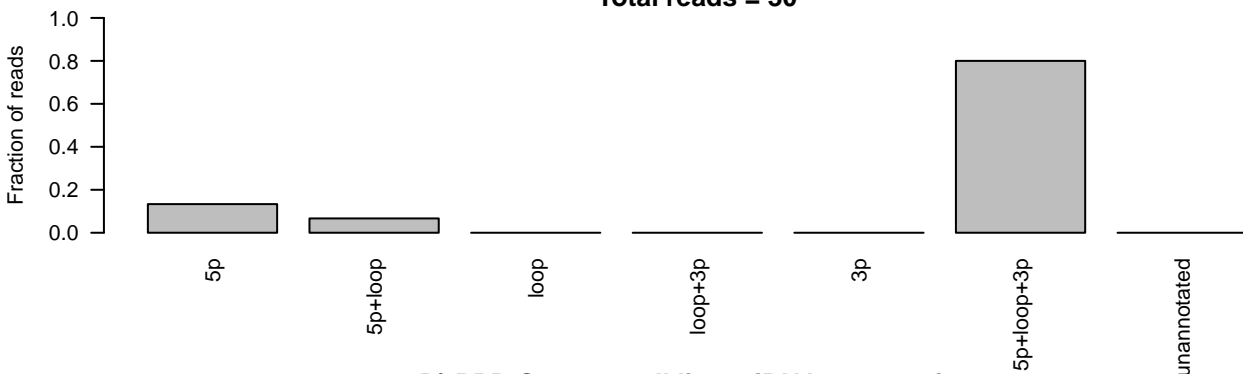

**D) PPB Case 14 cell line miRNA sequencing**  
ID=MI0000068\_1;accession\_number=MI0000068;Name=hsa-let-7f-2  
Total reads = 5

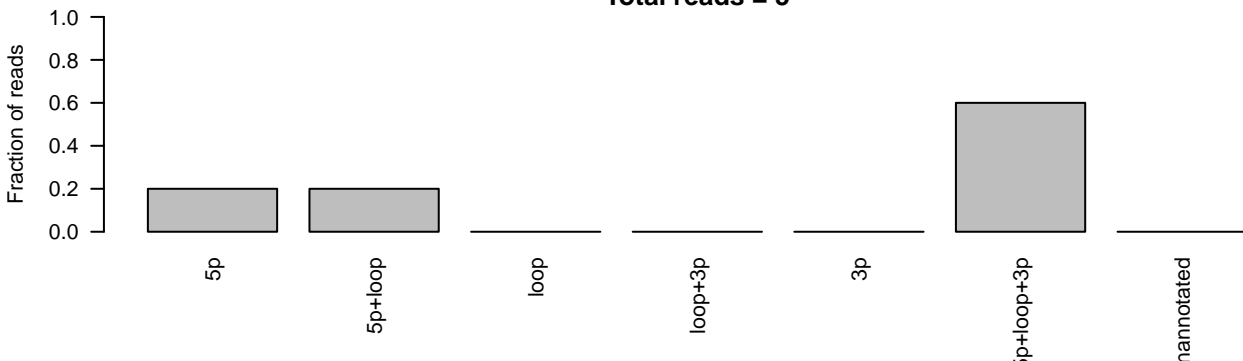

**B) Normal fibroblast miRNA sequencing**  
ID=MI0000103\_1;accession\_number=MI0000103;Name=hsa-mir-101-1  
Total reads = 17

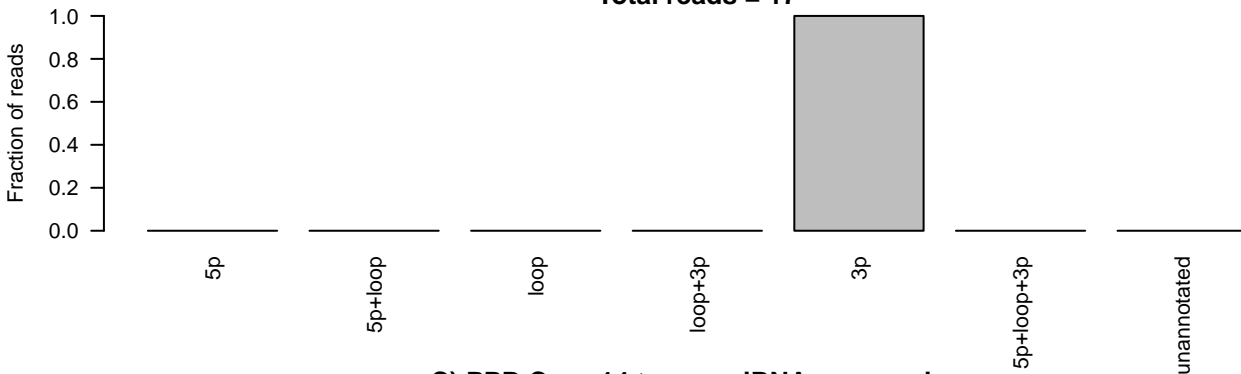

**C) PPB Case 14 tumor miRNA sequencing**  
ID=MI0000103\_1;accession\_number=MI0000103;Name=hsa-mir-101-1  
Total reads = 48

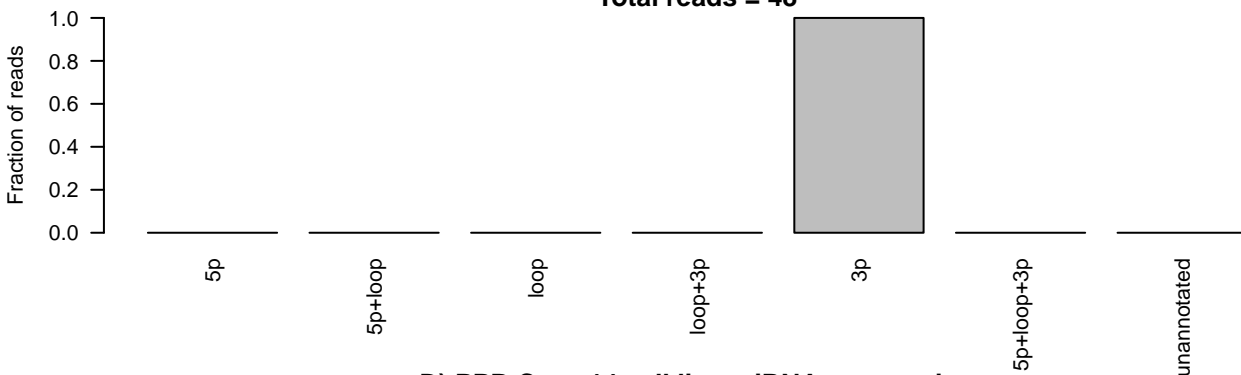

**D) PPB Case 14 cell line miRNA sequencing**  
ID=MI0000103\_1;accession\_number=MI0000103;Name=hsa-mir-101-1  
Total reads = 3

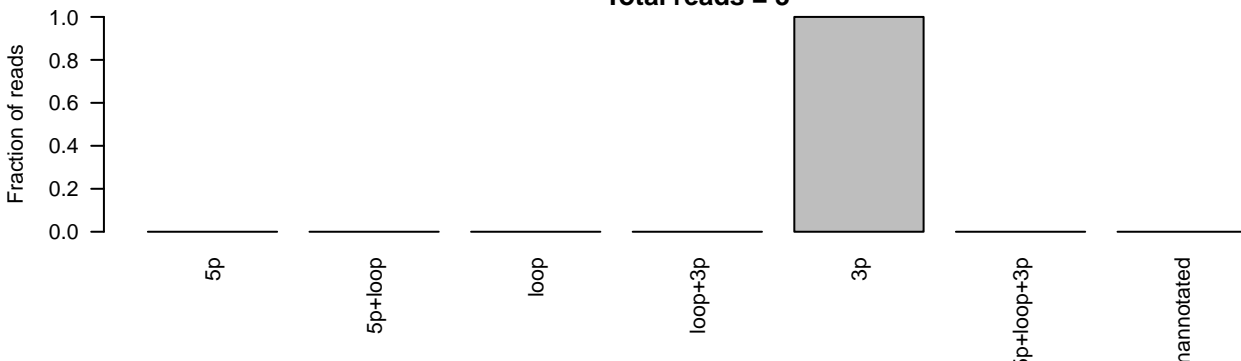

**B) Normal fibroblast miRNA sequencing**  
ID=MI0000073\_1;accession\_number=MI0000073;Name=hsa-mir-19a  
Total reads = 17

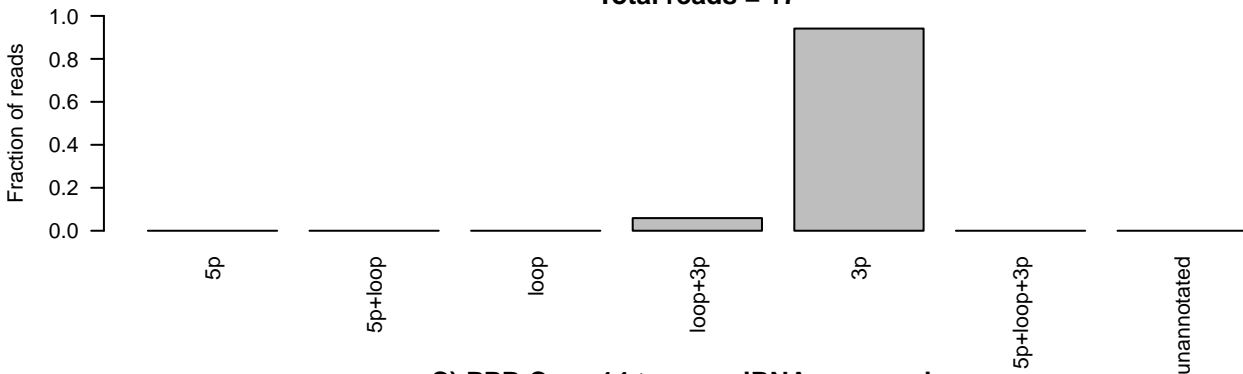

**C) PPB Case 14 tumor miRNA sequencing**  
ID=MI0000073\_1;accession\_number=MI0000073;Name=hsa-mir-19a  
Total reads = 50

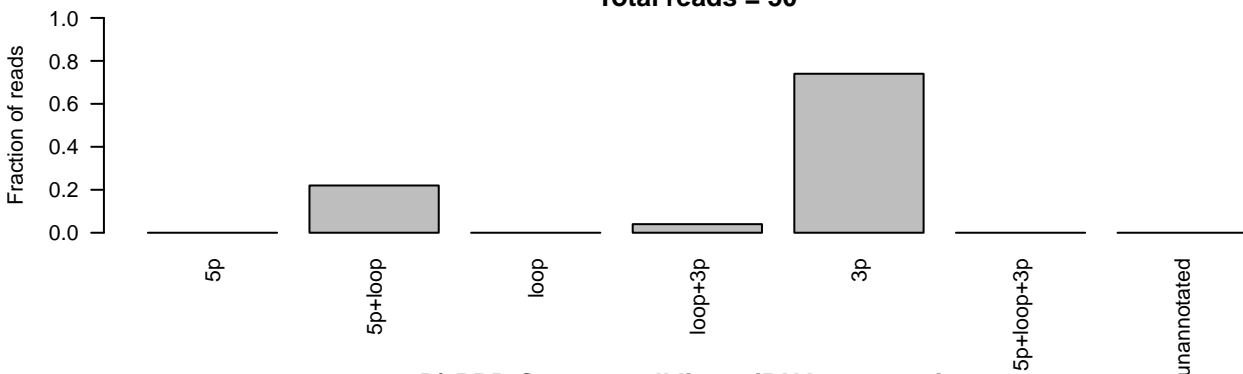

**D) PPB Case 14 cell line miRNA sequencing**  
ID=MI0000073\_1;accession\_number=MI0000073;Name=hsa-mir-19a  
Total reads = 1

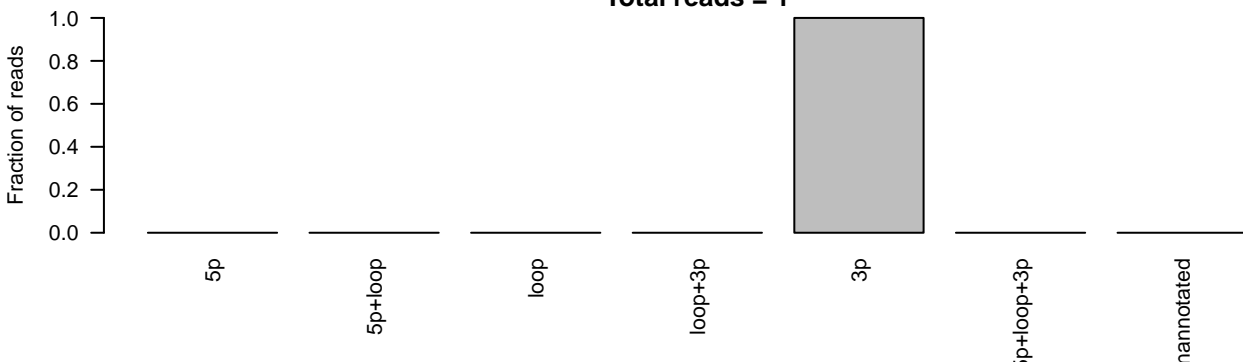

**B) Normal fibroblast miRNA sequencing**  
ID=MI0003513\_1;accession\_number=MI0003513;Name=hsa-mir-455  
Total reads = 19

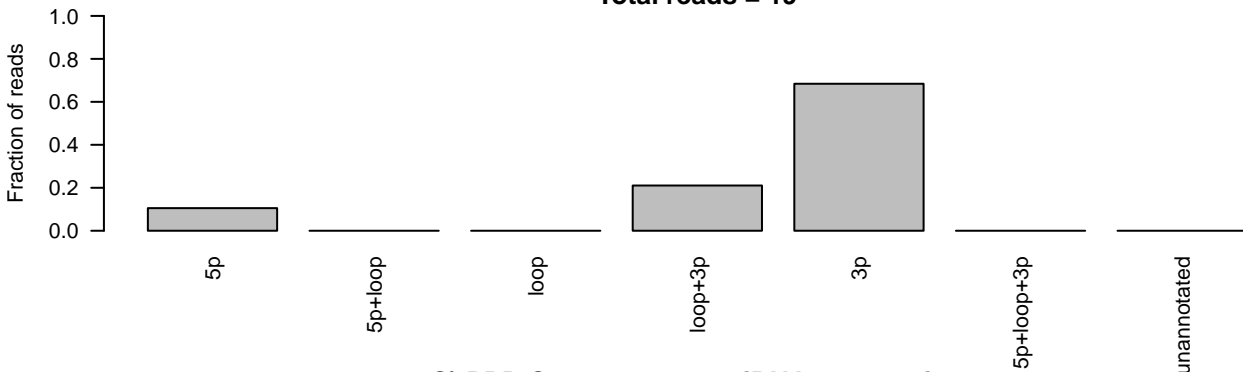

**C) PPB Case 14 tumor miRNA sequencing**  
ID=MI0003513\_1;accession\_number=MI0003513;Name=hsa-mir-455  
Total reads = 16

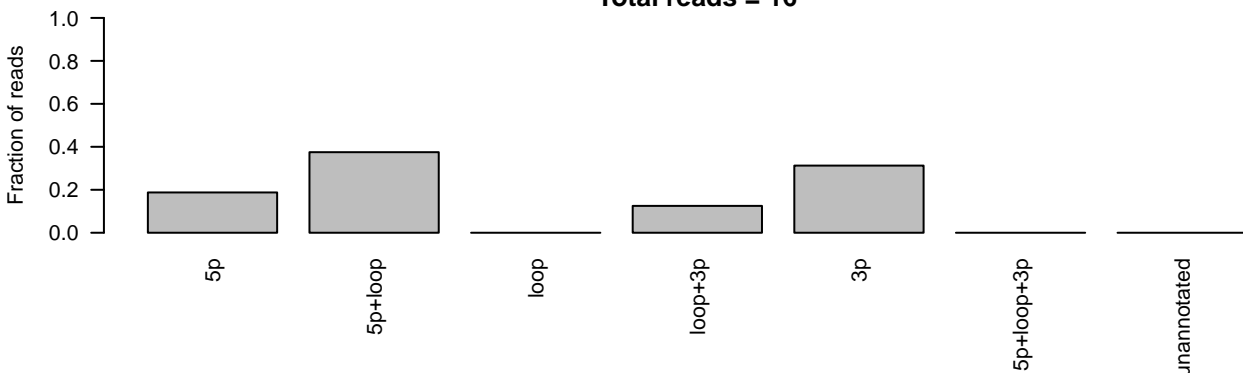

**D) PPB Case 14 cell line miRNA sequencing**  
ID=MI0003513\_1;accession\_number=MI0003513;Name=hsa-mir-455  
Total reads = 16

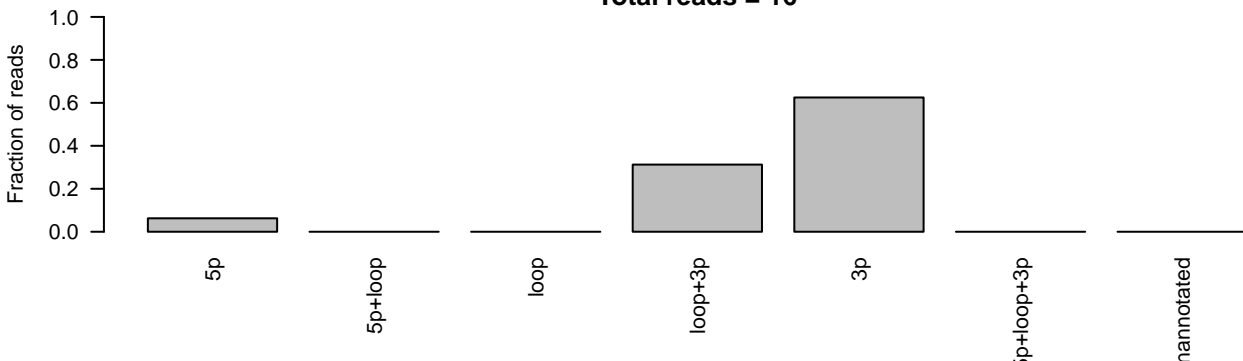

**B) Normal fibroblast miRNA sequencing**  
ID=MI0000735\_1;accession\_number=MI0000735;Name=hsa-mir-29c  
Total reads = 17

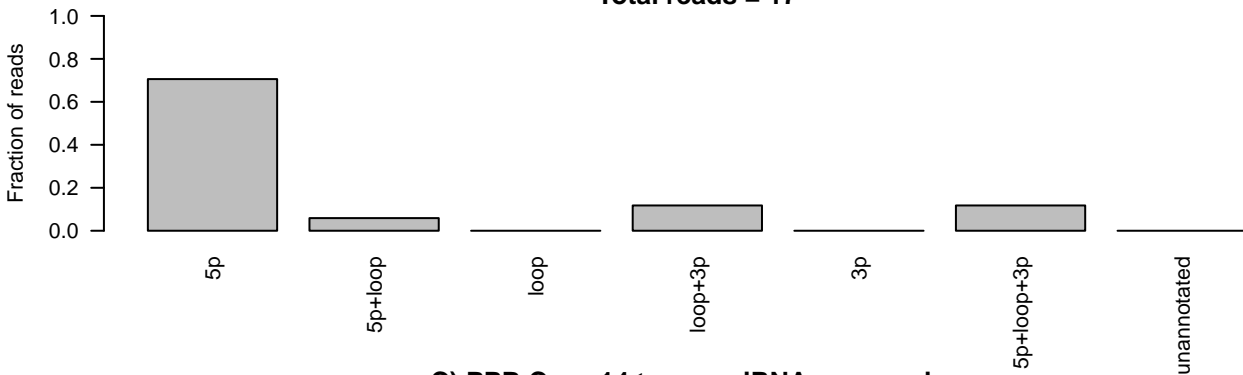

**C) PPB Case 14 tumor miRNA sequencing**  
ID=MI0000735\_1;accession\_number=MI0000735;Name=hsa-mir-29c  
Total reads = 0



**D) PPB Case 14 cell line miRNA sequencing**  
ID=MI0000735\_1;accession\_number=MI0000735;Name=hsa-mir-29c  
Total reads = 1



**B) Normal fibroblast miRNA sequencing**  
ID=MI0001721\_1;accession\_number=MI0001721;Name=hsa-mir-431  
Total reads = 17

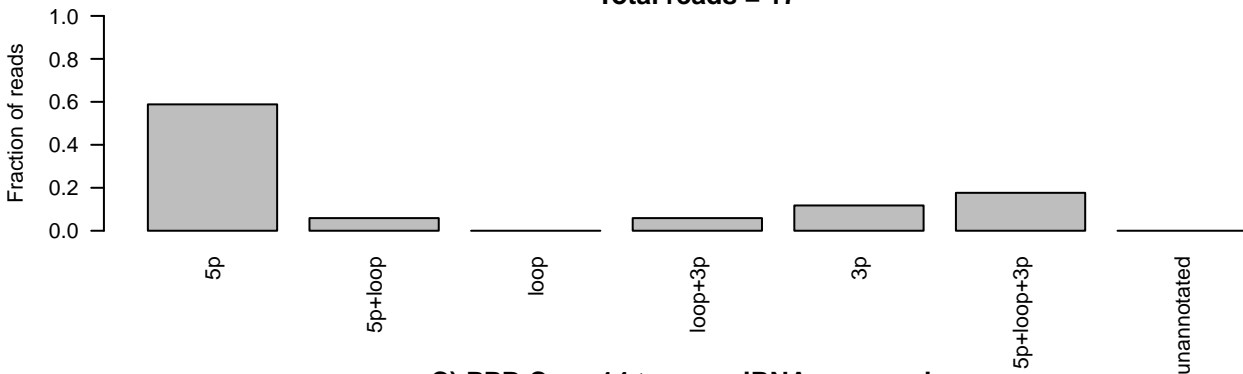

**C) PPB Case 14 tumor miRNA sequencing**  
ID=MI0001721\_1;accession\_number=MI0001721;Name=hsa-mir-431  
Total reads = 15

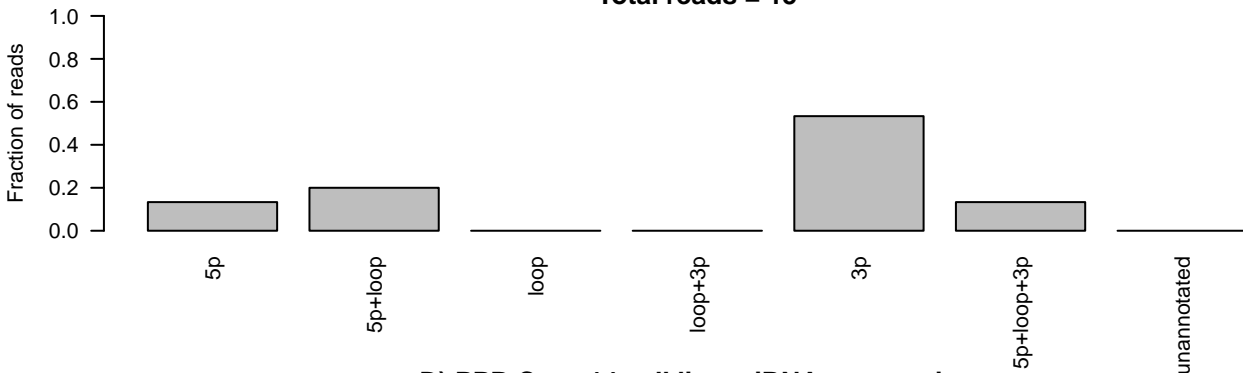

**D) PPB Case 14 cell line miRNA sequencing**  
ID=MI0001721\_1;accession\_number=MI0001721;Name=hsa-mir-431  
Total reads = 2

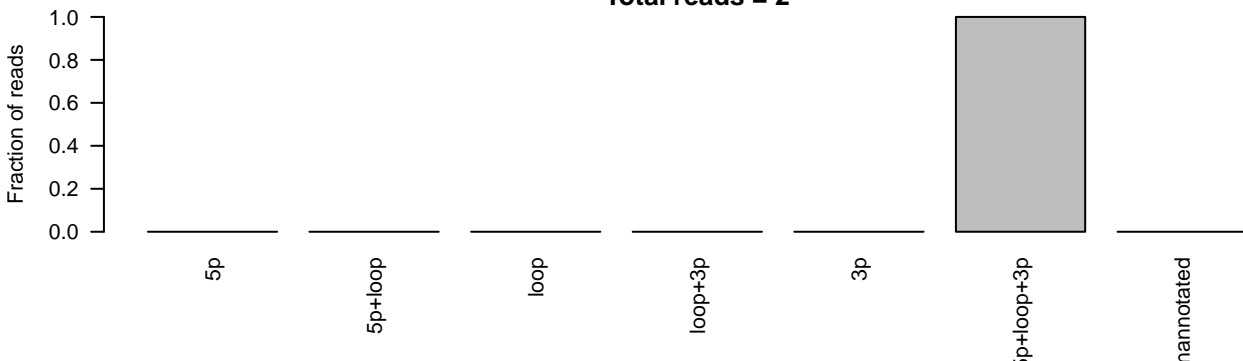

**B) Normal fibroblast miRNA sequencing**  
ID=MI0000790\_1;accession\_number=MI0000790;Name=hsa-mir-382  
Total reads = 16

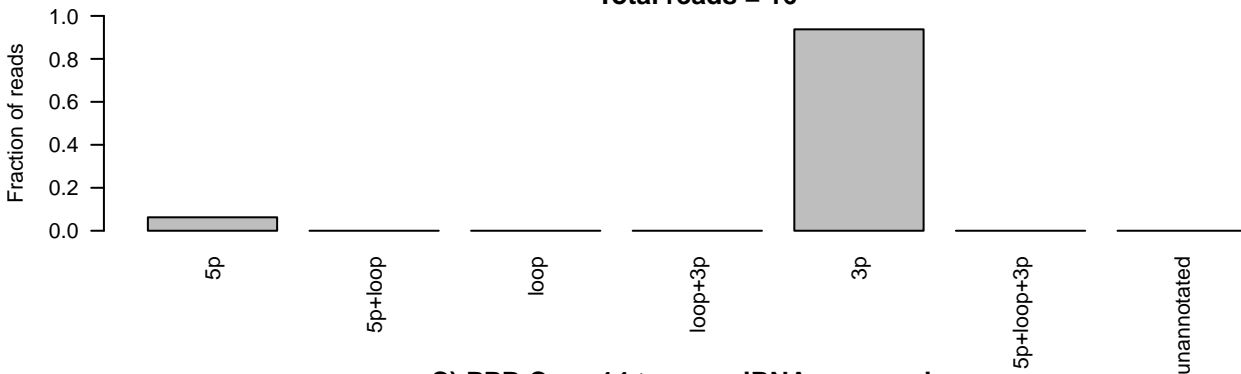

**C) PPB Case 14 tumor miRNA sequencing**  
ID=MI0000790\_1;accession\_number=MI0000790;Name=hsa-mir-382  
Total reads = 368

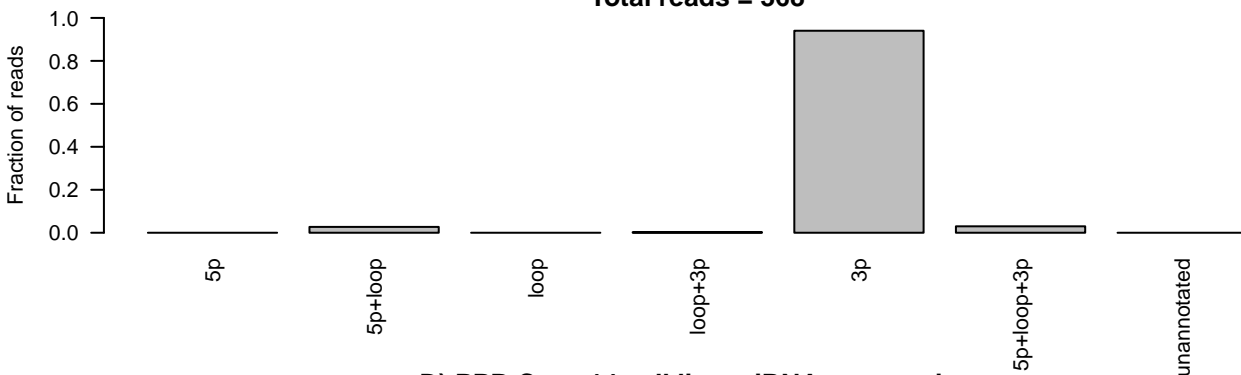

**D) PPB Case 14 cell line miRNA sequencing**  
ID=MI0000790\_1;accession\_number=MI0000790;Name=hsa-mir-382  
Total reads = 14

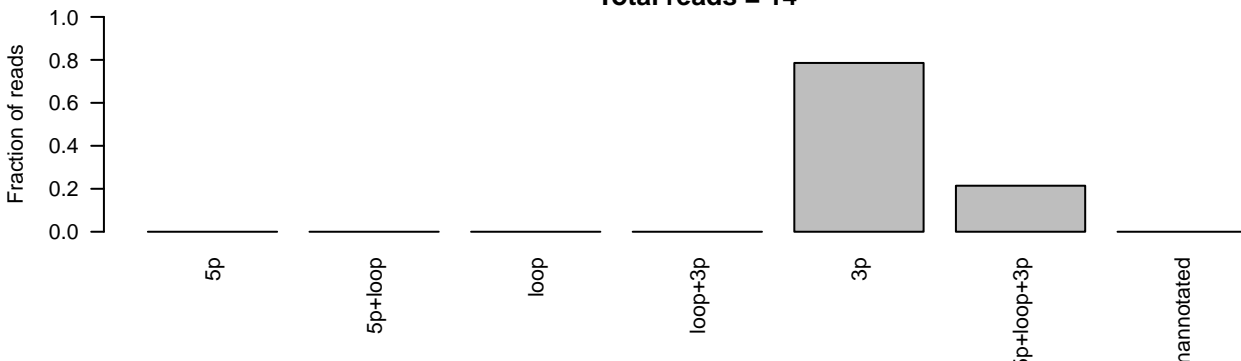



**B) Normal fibroblast miRNA sequencing**  
ID=MI0000777\_1;accession\_number=MI0000777;Name=hsa-mir-369  
Total reads = 17

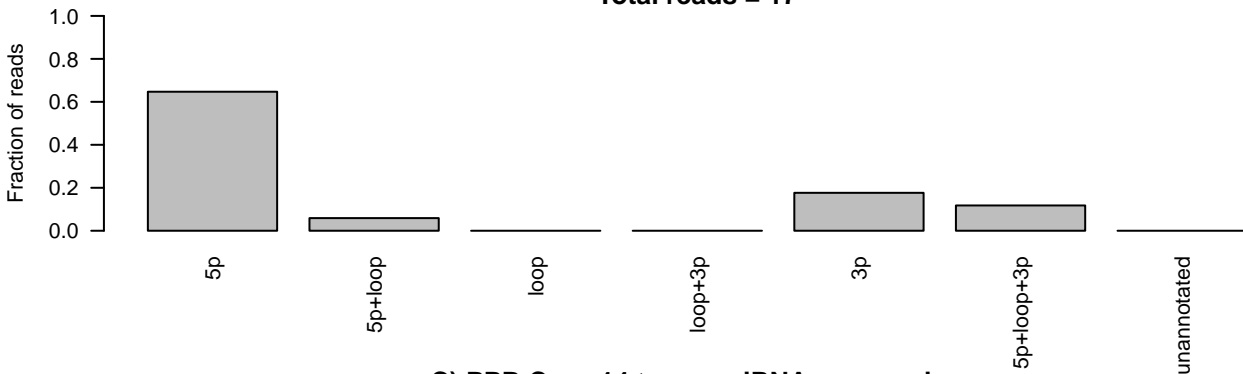

**C) PPB Case 14 tumor miRNA sequencing**  
ID=MI0000777\_1;accession\_number=MI0000777;Name=hsa-mir-369  
Total reads = 58

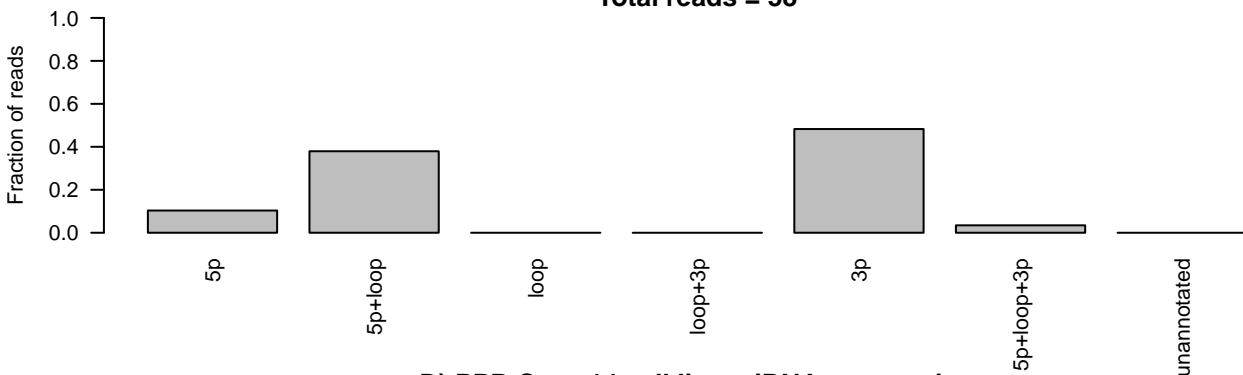

**D) PPB Case 14 cell line miRNA sequencing**  
ID=MI0000777\_1;accession\_number=MI0000777;Name=hsa-mir-369  
Total reads = 5

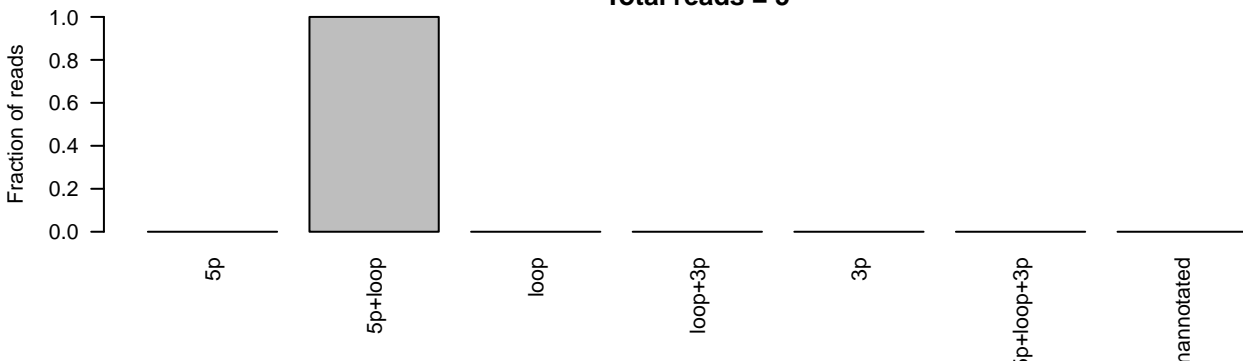

**B) Normal fibroblast miRNA sequencing**  
ID=MI0003815\_1;accession\_number=MI0003815;Name=hsa-mir-1301  
Total reads = 16

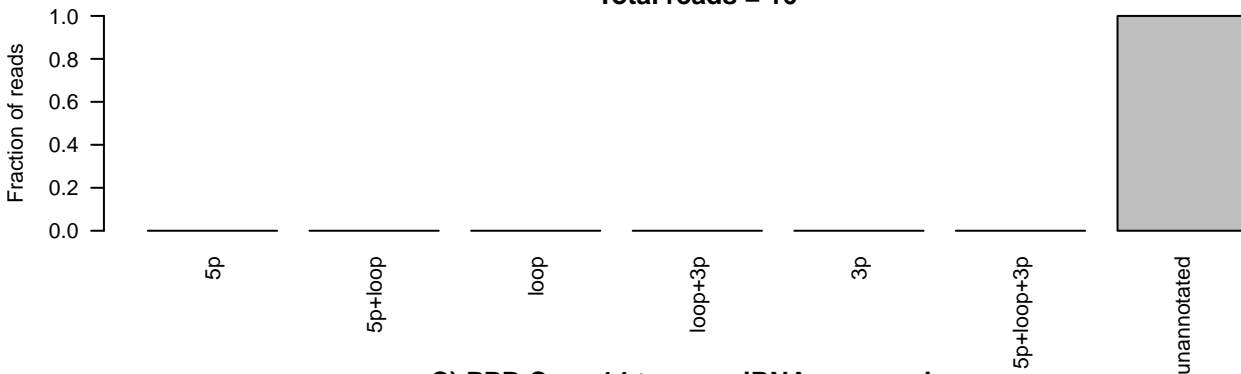

**C) PPB Case 14 tumor miRNA sequencing**  
ID=MI0003815\_1;accession\_number=MI0003815;Name=hsa-mir-1301  
Total reads = 9

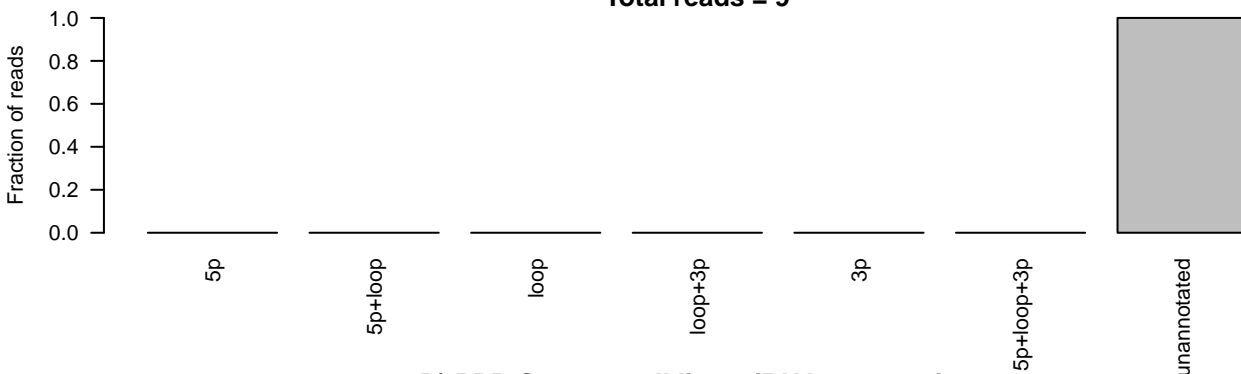

**D) PPB Case 14 cell line miRNA sequencing**  
ID=MI0003815\_1;accession\_number=MI0003815;Name=hsa-mir-1301  
Total reads = 2

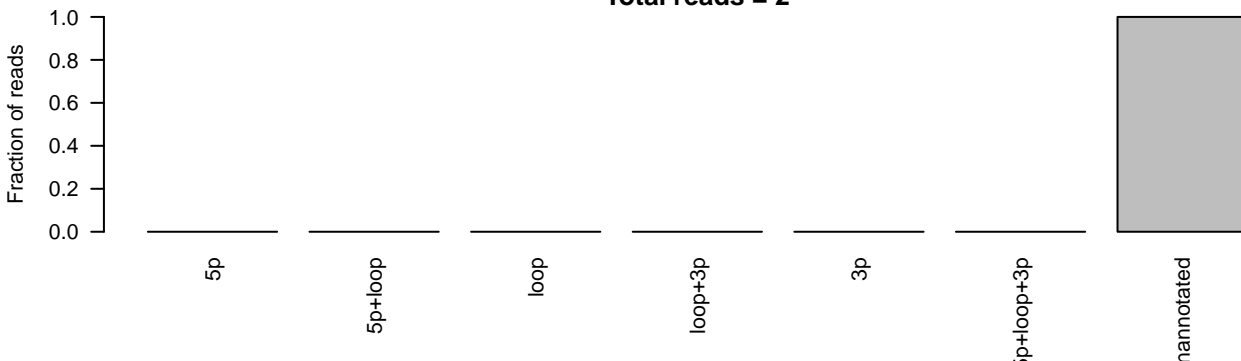

**B) Normal fibroblast miRNA sequencing**  
ID=MI0000064\_1;accession\_number=MI0000064;Name=hsa-let-7c  
Total reads = 6

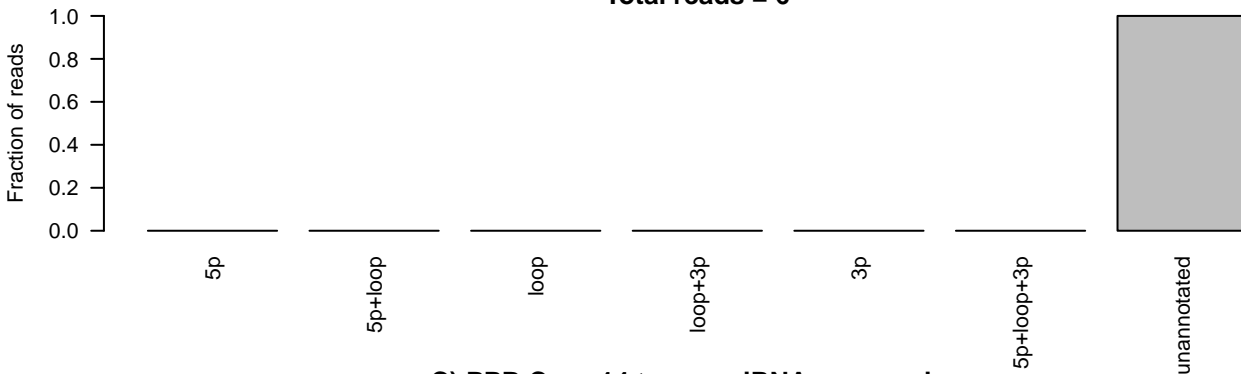

**C) PPB Case 14 tumor miRNA sequencing**  
ID=MI0000064\_1;accession\_number=MI0000064;Name=hsa-let-7c  
Total reads = 2



**D) PPB Case 14 cell line miRNA sequencing**  
ID=MI0000064\_1;accession\_number=MI0000064;Name=hsa-let-7c  
Total reads = 2



**B) Normal fibroblast miRNA sequencing**  
ID=MI0000449\_1;accession\_number=MI0000449;Name=hsa-mir-132  
Total reads = 15

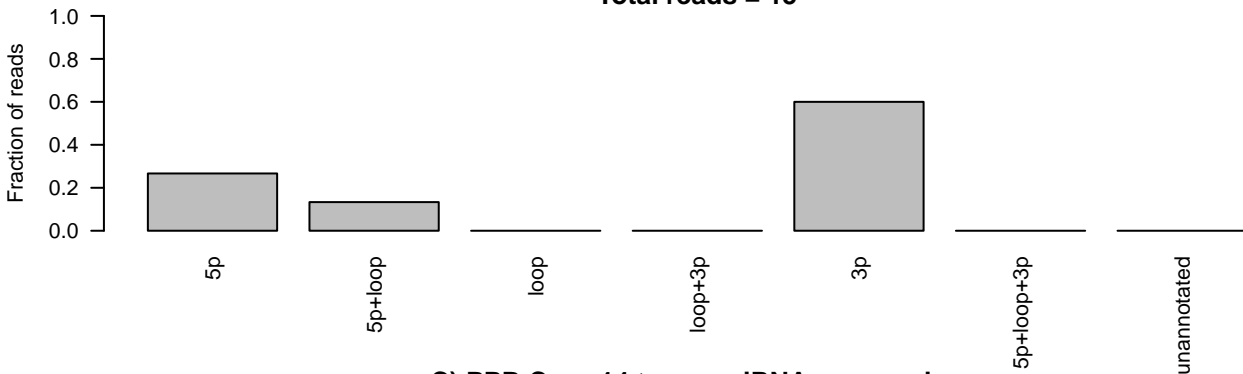

**C) PPB Case 14 tumor miRNA sequencing**  
ID=MI0000449\_1;accession\_number=MI0000449;Name=hsa-mir-132  
Total reads = 0

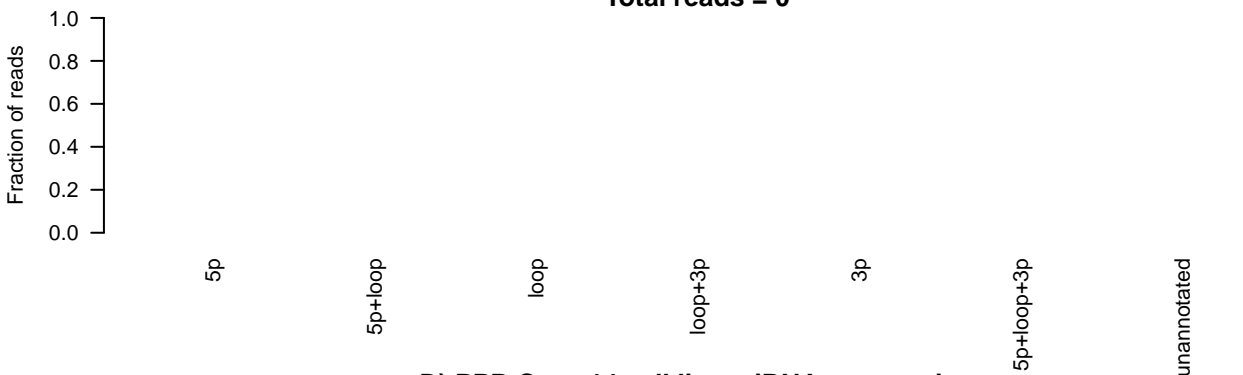

**D) PPB Case 14 cell line miRNA sequencing**  
ID=MI0000449\_1;accession\_number=MI0000449;Name=hsa-mir-132  
Total reads = 1

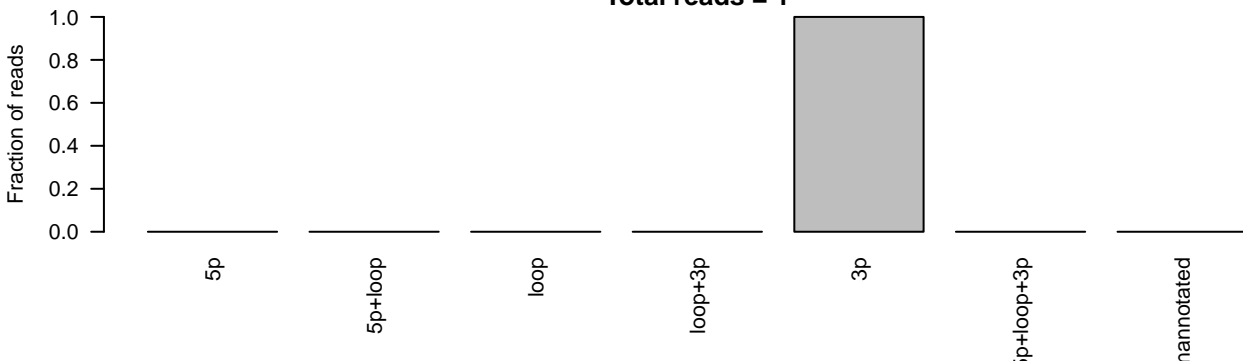

**B) Normal fibroblast miRNA sequencing**  
ID=MI0003139\_1;accession\_number=MI0003139;Name=hsa-mir-181d  
Total reads = 15

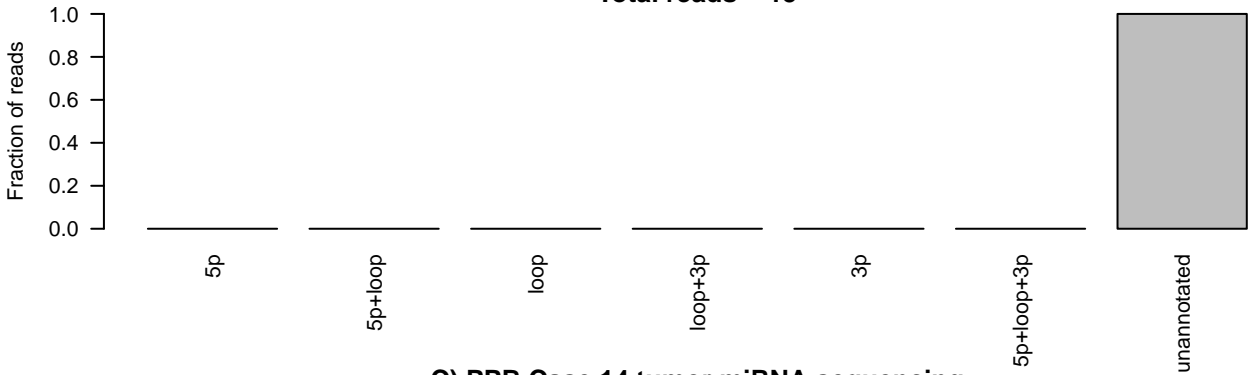

**C) PPB Case 14 tumor miRNA sequencing**  
ID=MI0003139\_1;accession\_number=MI0003139;Name=hsa-mir-181d  
Total reads = 0

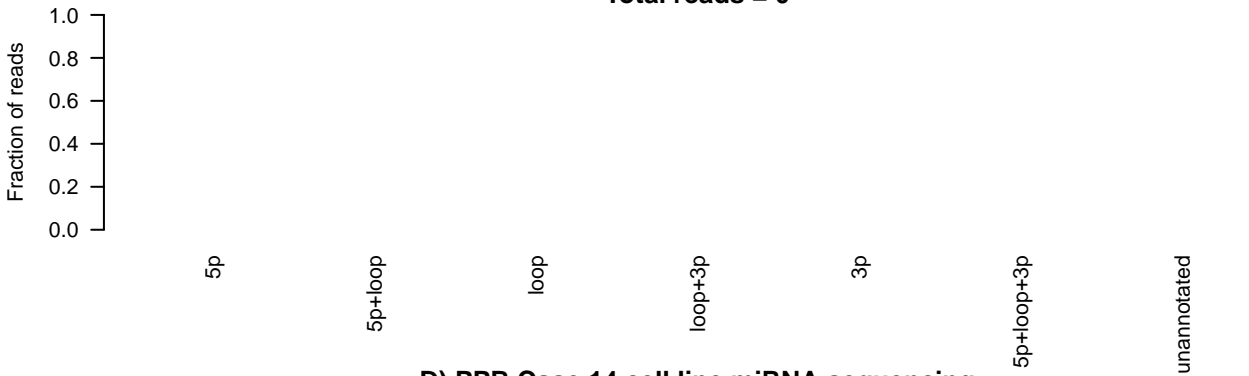

**D) PPB Case 14 cell line miRNA sequencing**  
ID=MI0003139\_1;accession\_number=MI0003139;Name=hsa-mir-181d  
Total reads = 0

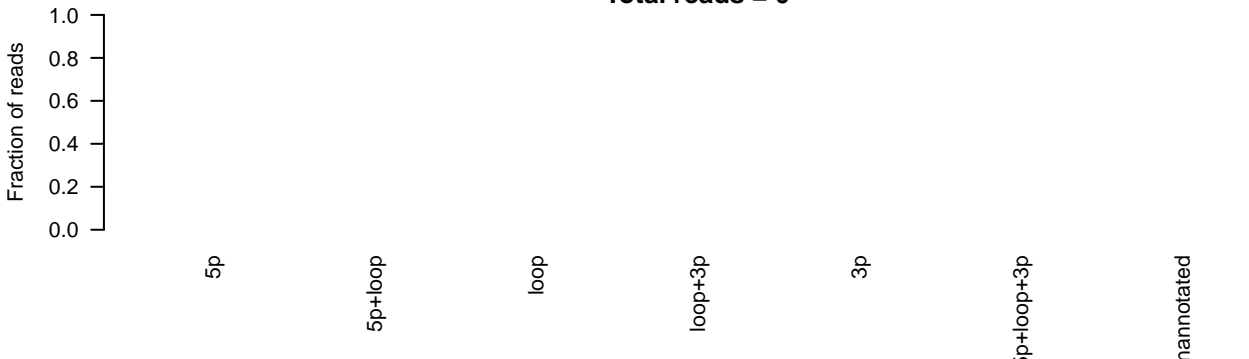

**B) Normal fibroblast miRNA sequencing**  
ID=MI0000748\_1;accession\_number=MI0000748;Name=hsa-mir-130b  
Total reads = 12

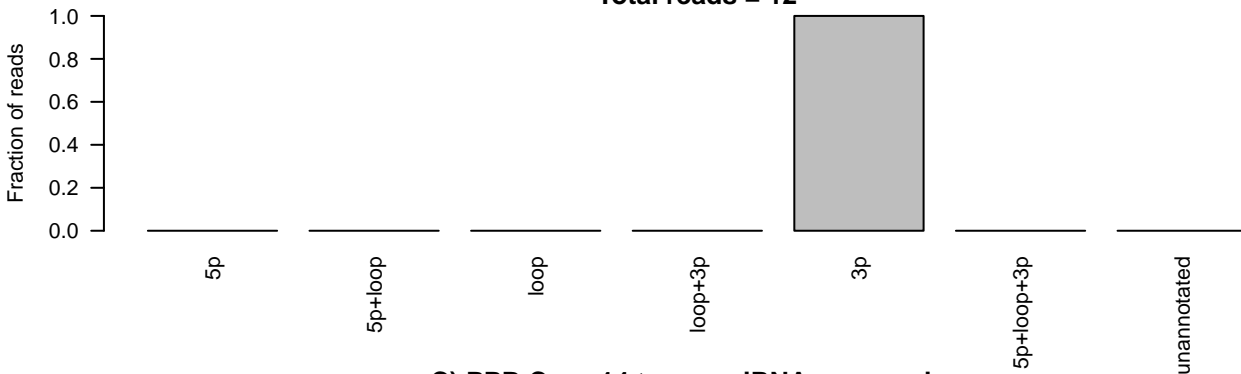

**C) PPB Case 14 tumor miRNA sequencing**  
ID=MI0000748\_1;accession\_number=MI0000748;Name=hsa-mir-130b  
Total reads = 23

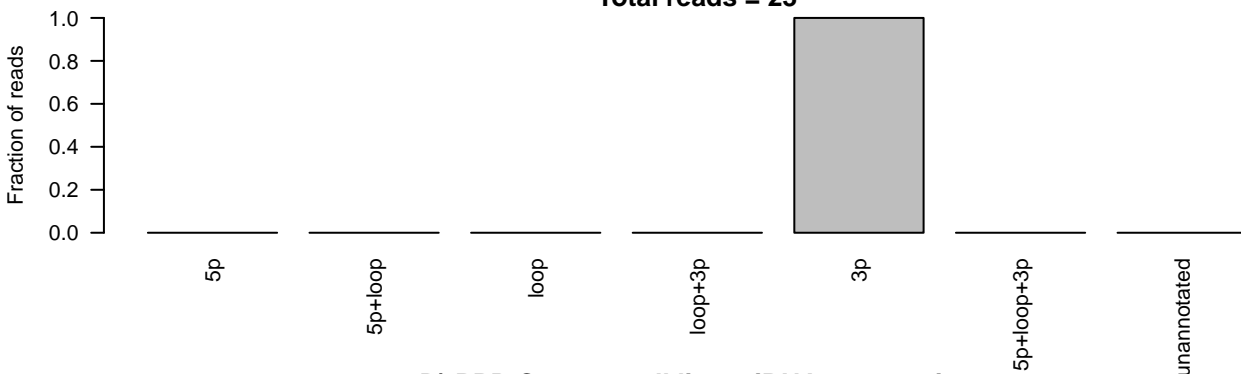

**D) PPB Case 14 cell line miRNA sequencing**  
ID=MI0000748\_1;accession\_number=MI0000748;Name=hsa-mir-130b  
Total reads = 2

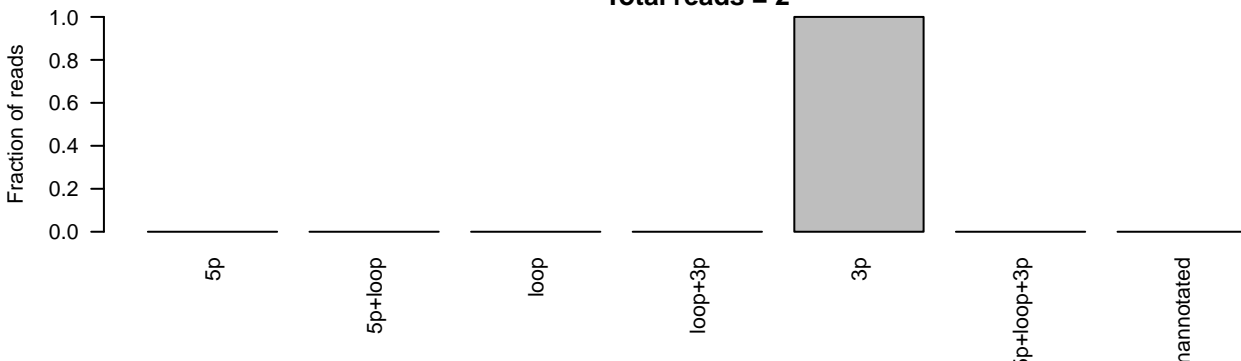

**B) Normal fibroblast miRNA sequencing**  
ID=MI0000472\_1;accession\_number=MI0000472;Name=hsa-mir-127  
Total reads = 14

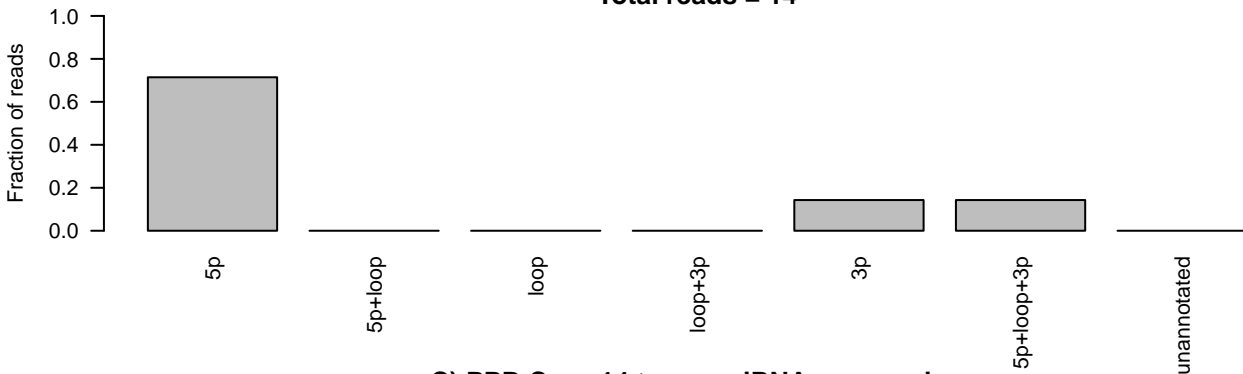

**C) PPB Case 14 tumor miRNA sequencing**  
ID=MI0000472\_1;accession\_number=MI0000472;Name=hsa-mir-127  
Total reads = 157

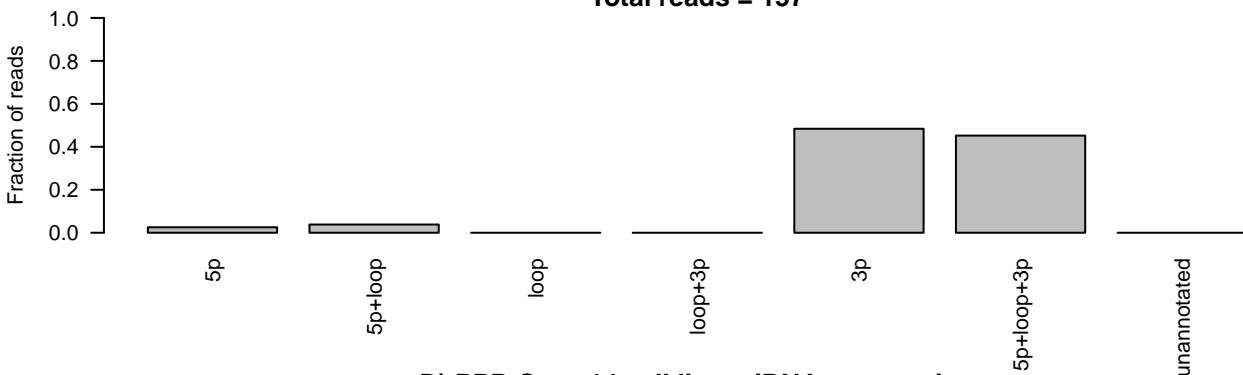

**D) PPB Case 14 cell line miRNA sequencing**  
ID=MI0000472\_1;accession\_number=MI0000472;Name=hsa-mir-127  
Total reads = 15

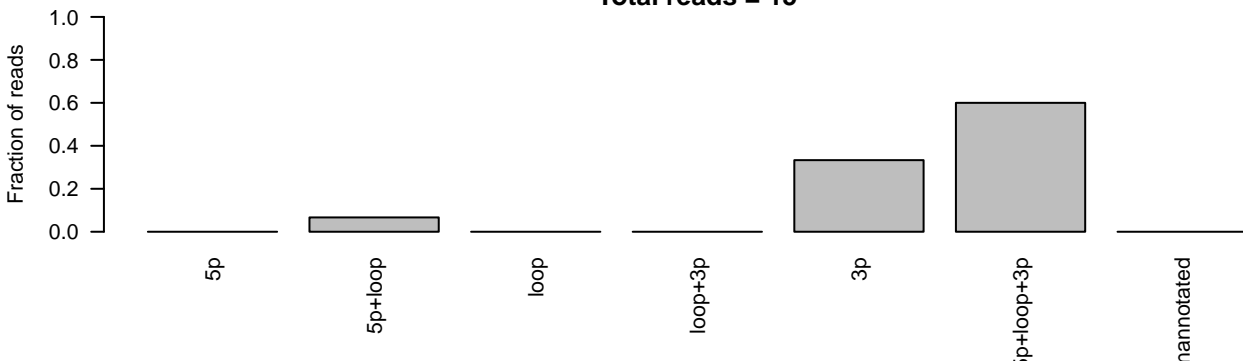

**B) Normal fibroblast miRNA sequencing**  
ID=MI0000486\_1;accession\_number=MI0000486;Name=hsa-mir-190a  
Total reads = 14

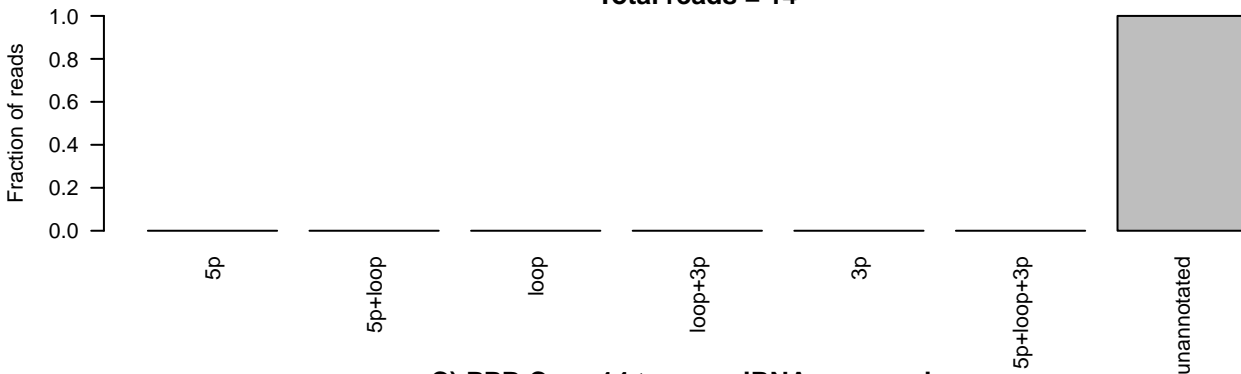

**C) PPB Case 14 tumor miRNA sequencing**  
ID=MI0000486\_1;accession\_number=MI0000486;Name=hsa-mir-190a  
Total reads = 2

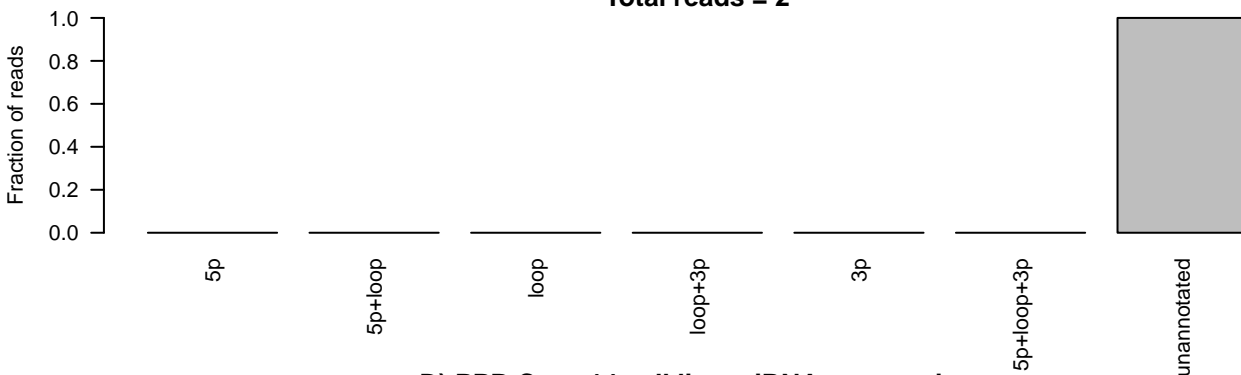

**D) PPB Case 14 cell line miRNA sequencing**  
ID=MI0000486\_1;accession\_number=MI0000486;Name=hsa-mir-190a  
Total reads = 0





**B) Normal fibroblast miRNA sequencing**  
ID=MI0005568\_1;accession\_number=MI0005568;Name=hsa-mir-301b  
Total reads = 14

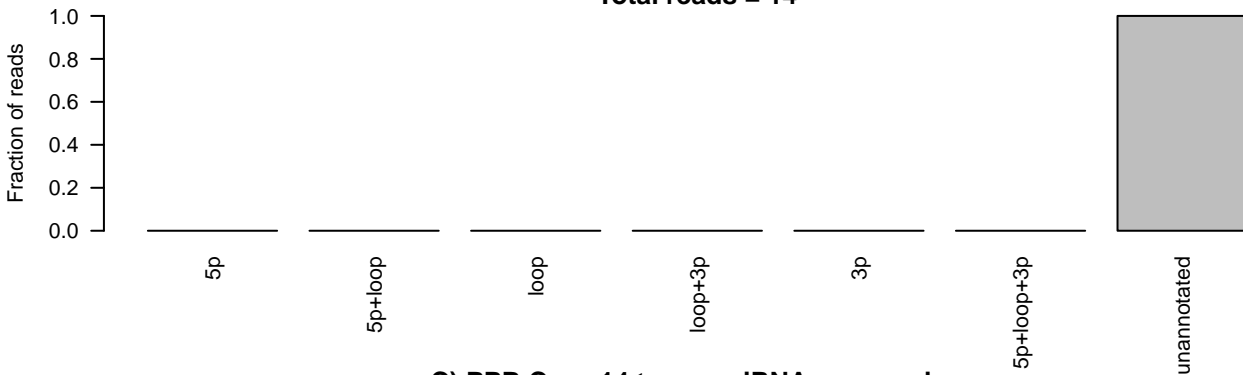

**C) PPB Case 14 tumor miRNA sequencing**  
ID=MI0005568\_1;accession\_number=MI0005568;Name=hsa-mir-301b  
Total reads = 38

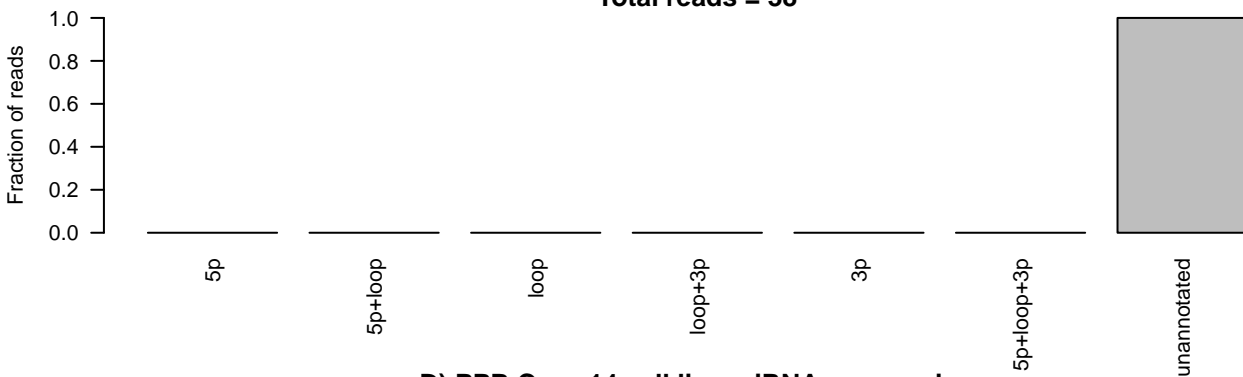

**D) PPB Case 14 cell line miRNA sequencing**  
ID=MI0005568\_1;accession\_number=MI0005568;Name=hsa-mir-301b  
Total reads = 0



**B) Normal fibroblast miRNA sequencing**  
ID=MI0000749\_1;accession\_number=MI0000749;Name=hsa-mir-30e  
Total reads = 16

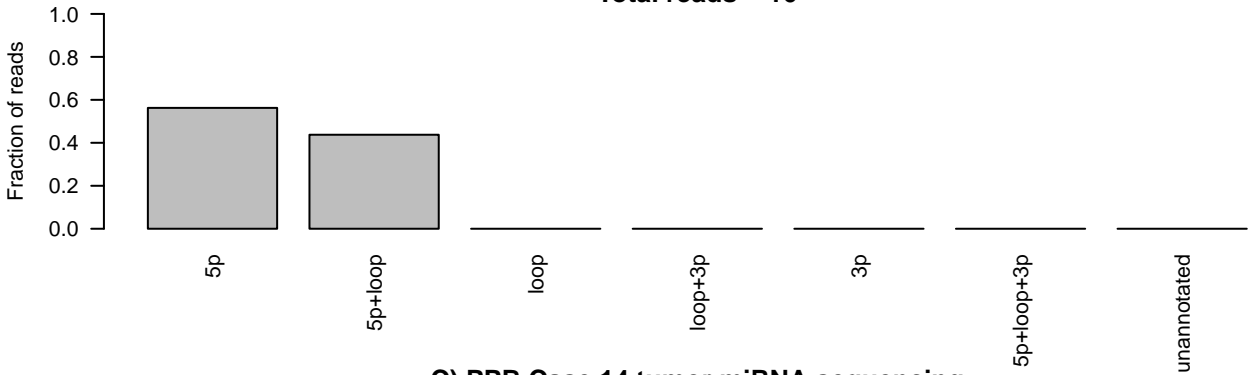

**C) PPB Case 14 tumor miRNA sequencing**  
ID=MI0000749\_1;accession\_number=MI0000749;Name=hsa-mir-30e  
Total reads = 14

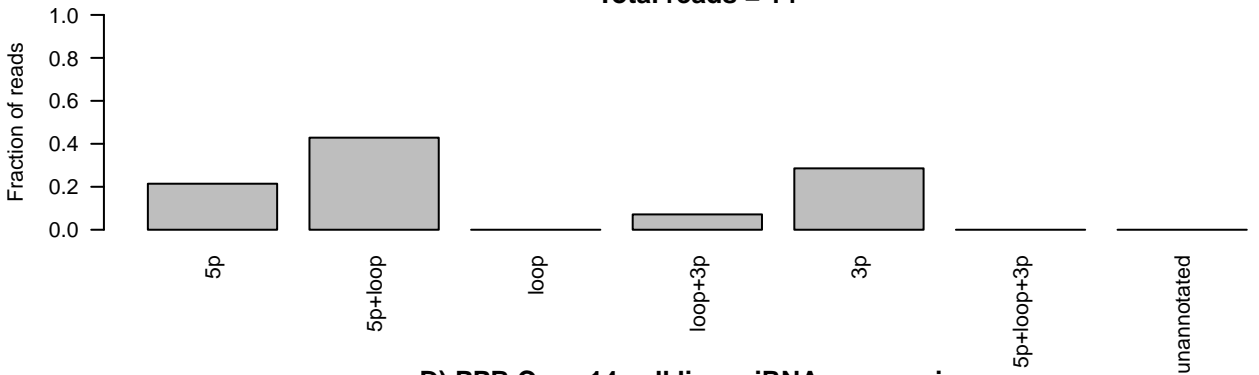

**D) PPB Case 14 cell line miRNA sequencing**  
ID=MI0000749\_1;accession\_number=MI0000749;Name=hsa-mir-30e  
Total reads = 2

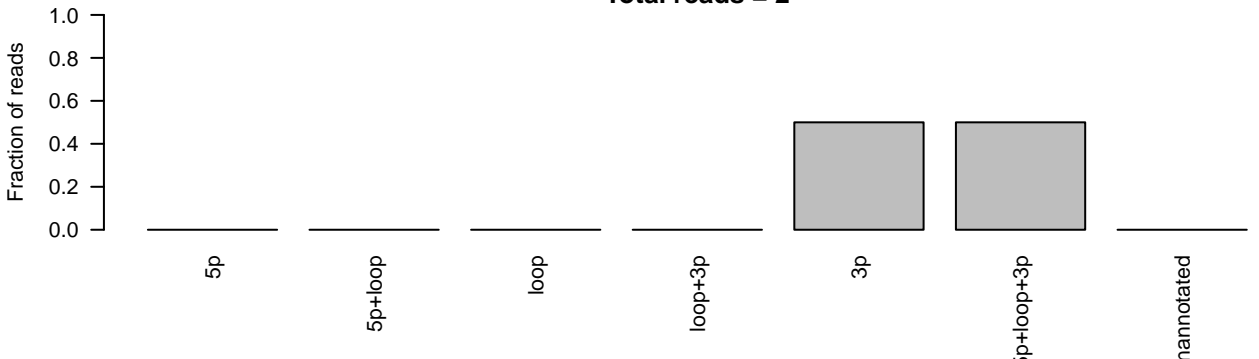

**B) Normal fibroblast miRNA sequencing**  
ID=MI0003757\_1;accession\_number=MI0003757;Name=hsa-mir-758  
Total reads = 13

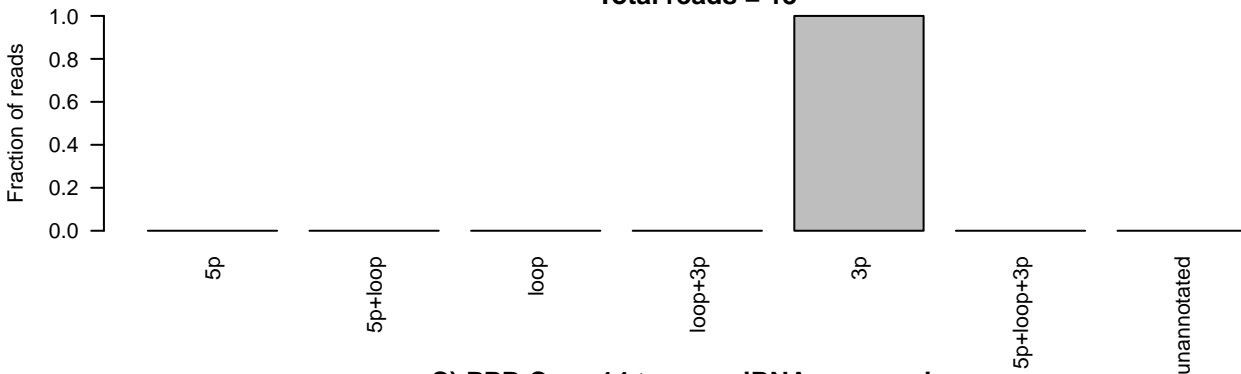

**C) PPB Case 14 tumor miRNA sequencing**  
ID=MI0003757\_1;accession\_number=MI0003757;Name=hsa-mir-758  
Total reads = 91

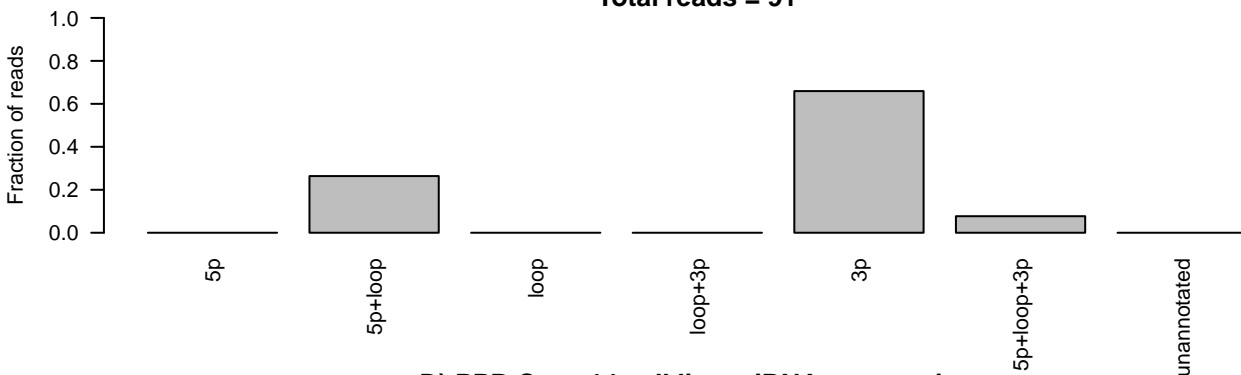

**D) PPB Case 14 cell line miRNA sequencing**  
ID=MI0003757\_1;accession\_number=MI0003757;Name=hsa-mir-758  
Total reads = 11

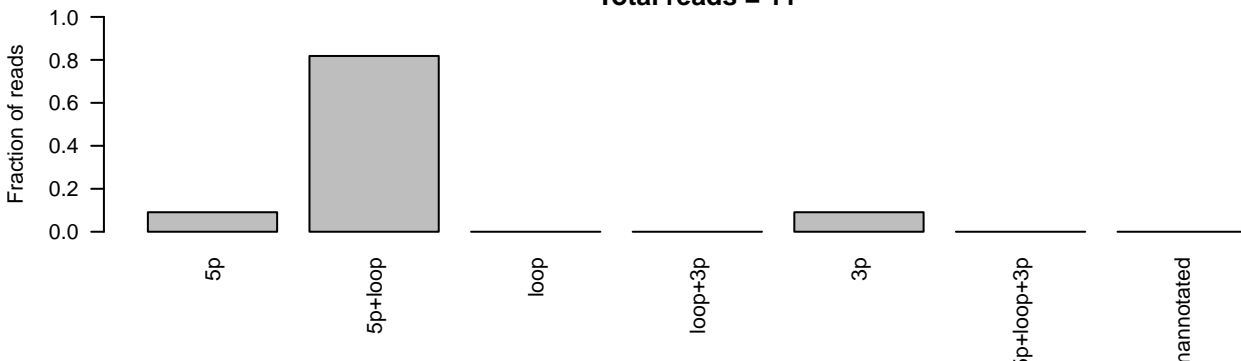

**B) Normal fibroblast miRNA sequencing**  
ID=MI0003672\_1;accession\_number=MI0003672;Name=hsa-mir-663a  
Total reads = 0



**C) PPB Case 14 tumor miRNA sequencing**  
ID=MI0003672\_1;accession\_number=MI0003672;Name=hsa-mir-663a  
Total reads = 0



**D) PPB Case 14 cell line miRNA sequencing**  
ID=MI0003672\_1;accession\_number=MI0003672;Name=hsa-mir-663a  
Total reads = 0



**B) Normal fibroblast miRNA sequencing**  
ID=MI0000282\_1;accession\_number=MI0000282;Name=hsa-mir-199b  
Total reads = 12

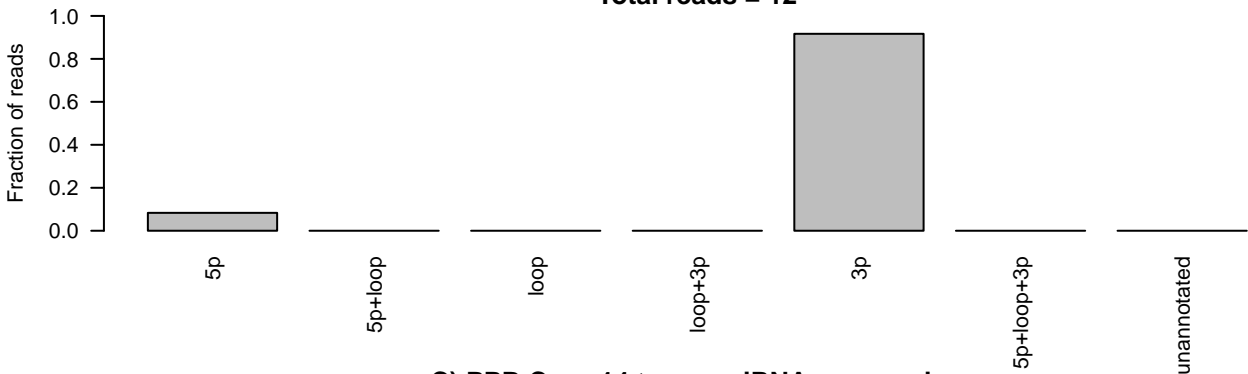

**C) PPB Case 14 tumor miRNA sequencing**  
ID=MI0000282\_1;accession\_number=MI0000282;Name=hsa-mir-199b  
Total reads = 63

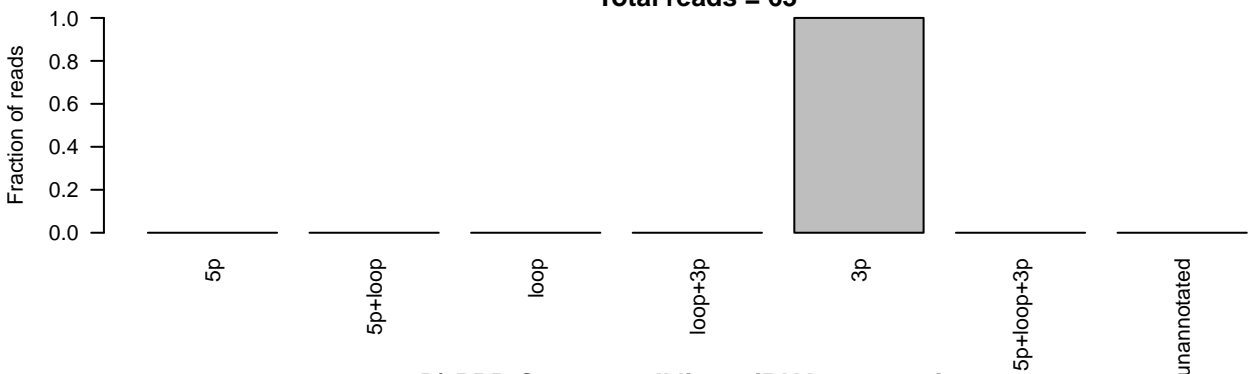

**D) PPB Case 14 cell line miRNA sequencing**  
ID=MI0000282\_1;accession\_number=MI0000282;Name=hsa-mir-199b  
Total reads = 9

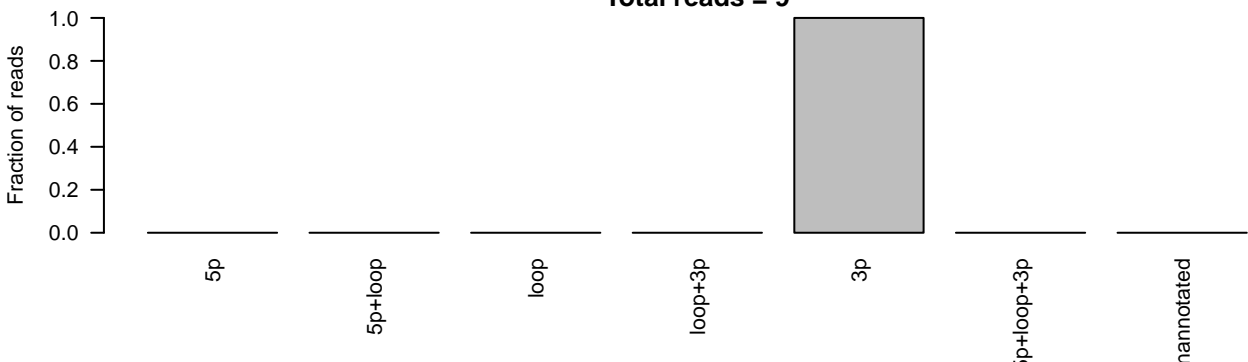

**B) Normal fibroblast miRNA sequencing**  
ID=MI0002469\_1;accession\_number=MI0002469;Name=hsa-mir-485  
Total reads = 20

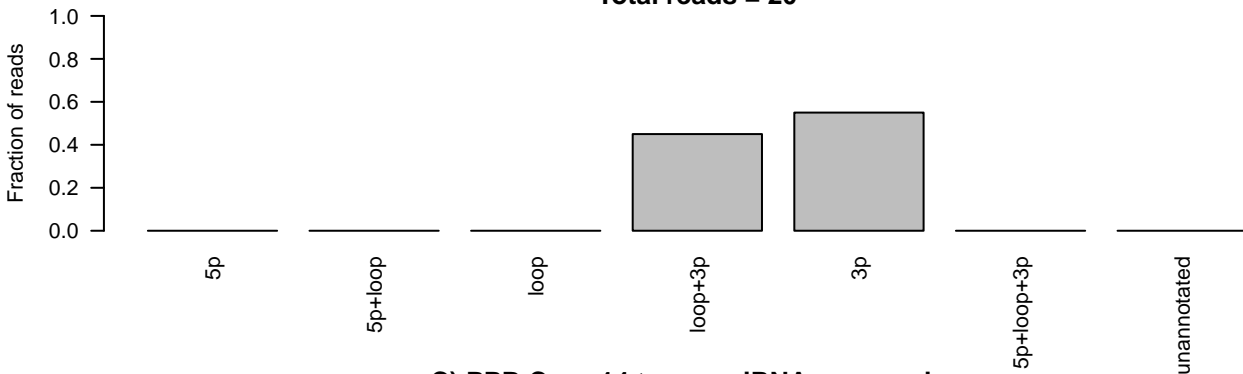

**C) PPB Case 14 tumor miRNA sequencing**  
ID=MI0002469\_1;accession\_number=MI0002469;Name=hsa-mir-485  
Total reads = 381

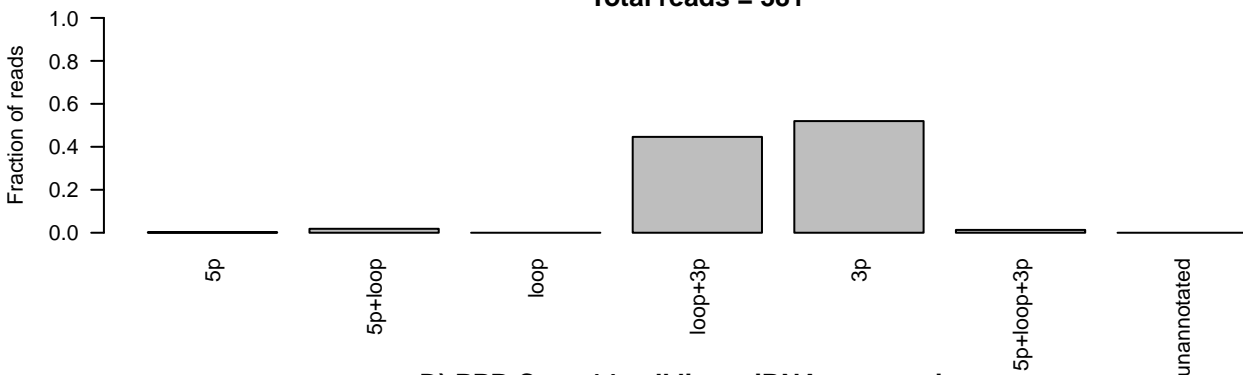

**D) PPB Case 14 cell line miRNA sequencing**  
ID=MI0002469\_1;accession\_number=MI0002469;Name=hsa-mir-485  
Total reads = 13

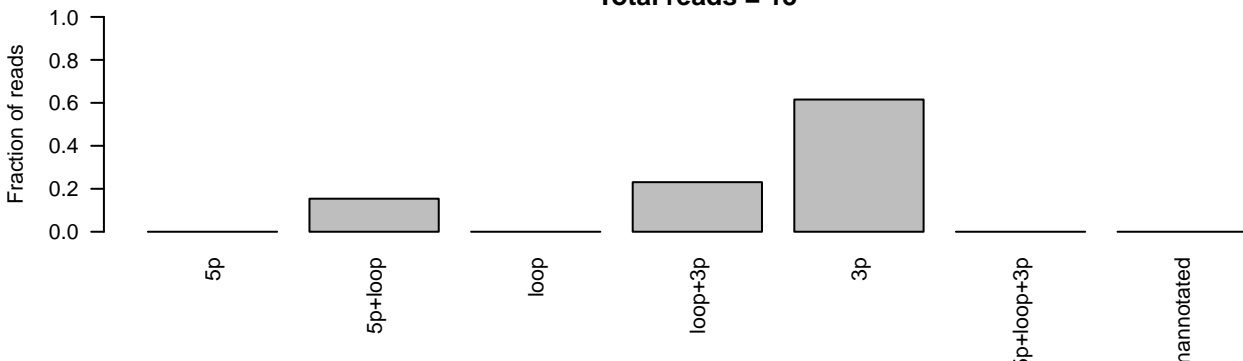

**B) Normal fibroblast miRNA sequencing**  
ID=MI0000456\_1;accession\_number=MI0000456;Name=hsa-mir-140  
Total reads = 11

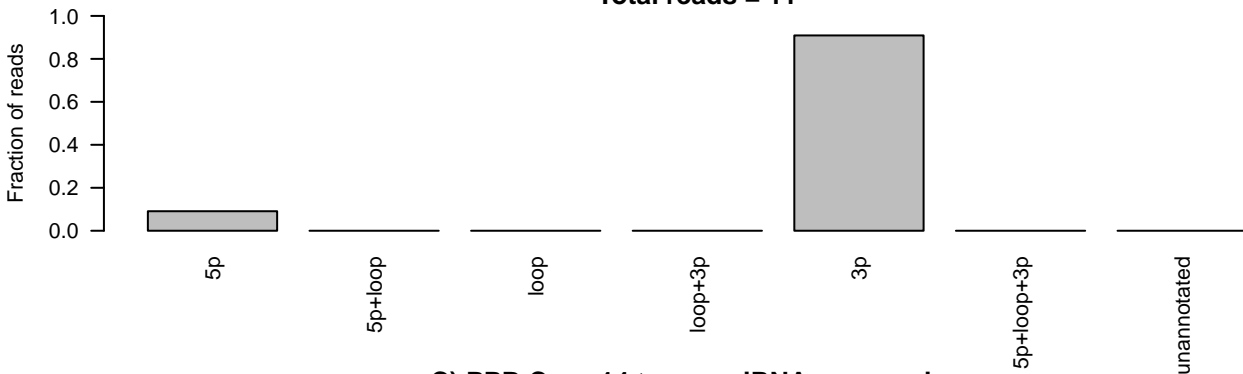

**C) PPB Case 14 tumor miRNA sequencing**  
ID=MI0000456\_1;accession\_number=MI0000456;Name=hsa-mir-140  
Total reads = 8

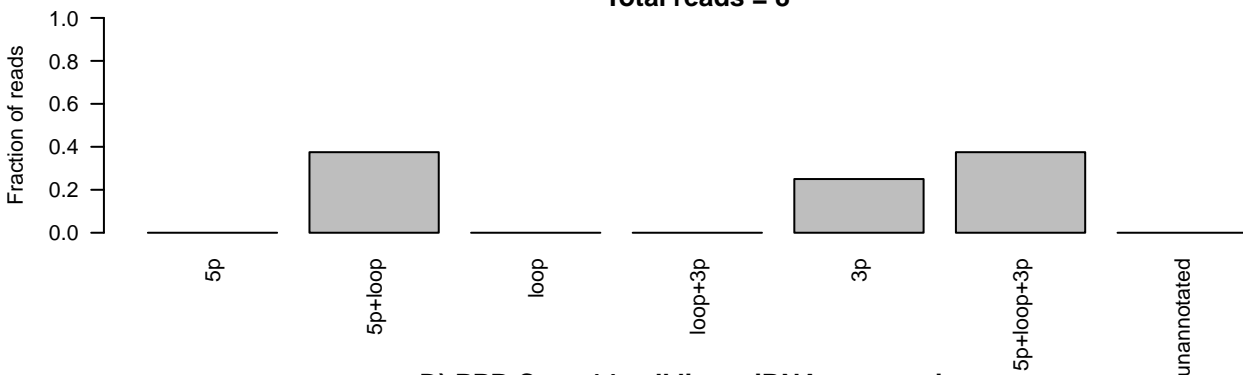

**D) PPB Case 14 cell line miRNA sequencing**  
ID=MI0000456\_1;accession\_number=MI0000456;Name=hsa-mir-140  
Total reads = 2

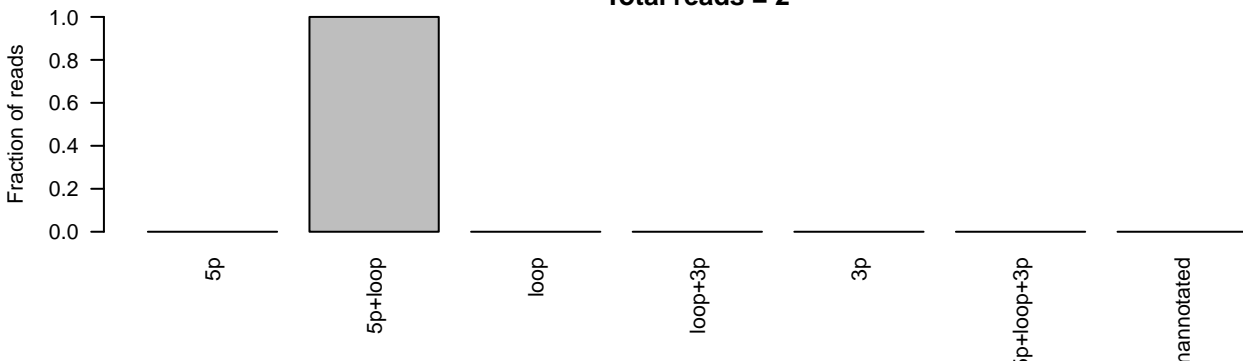

**B) Normal fibroblast miRNA sequencing**  
ID=MI0000813\_1;accession\_number=MI0000813;Name=hsa-mir-324  
Total reads = 11

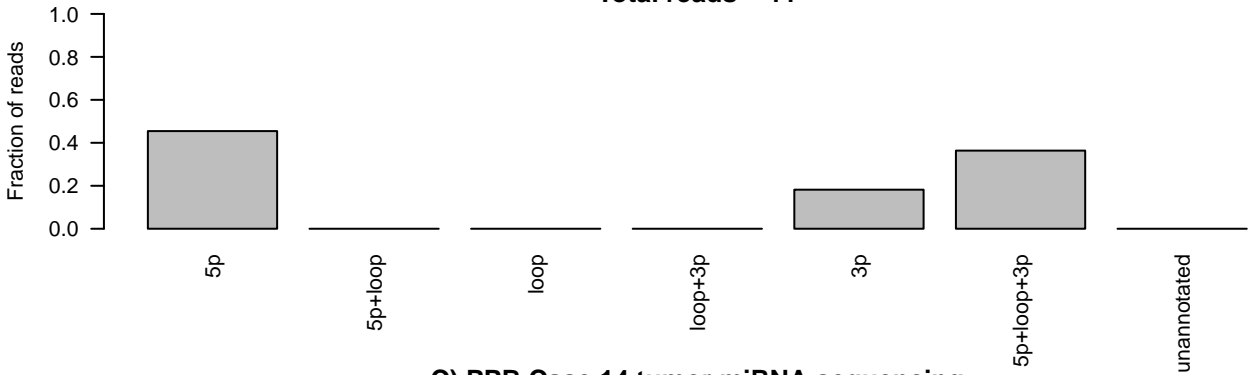

**C) PPB Case 14 tumor miRNA sequencing**  
ID=MI0000813\_1;accession\_number=MI0000813;Name=hsa-mir-324  
Total reads = 3

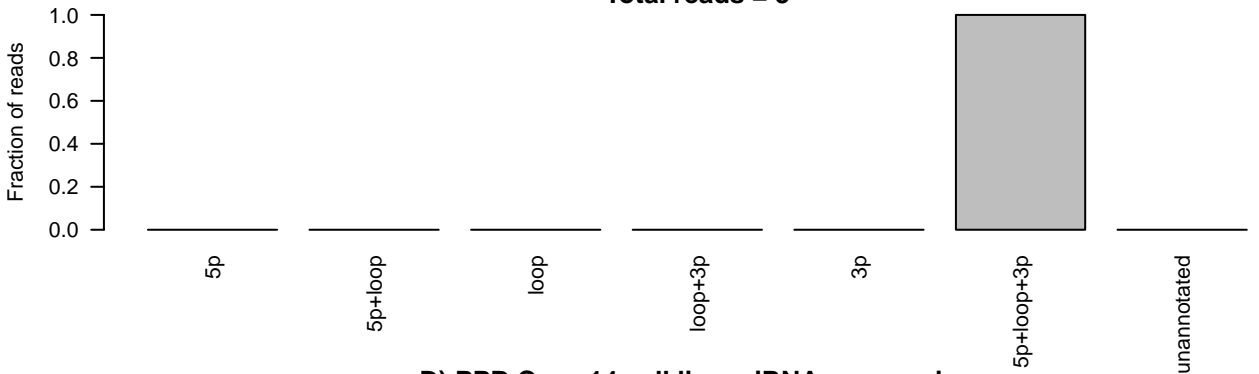

**D) PPB Case 14 cell line miRNA sequencing**  
ID=MI0000813\_1;accession\_number=MI0000813;Name=hsa-mir-324  
Total reads = 0





**B) Normal fibroblast miRNA sequencing**  
ID=MI0000107\_1;accession\_number=MI0000107;Name=hsa-mir-29b-2  
Total reads = 10

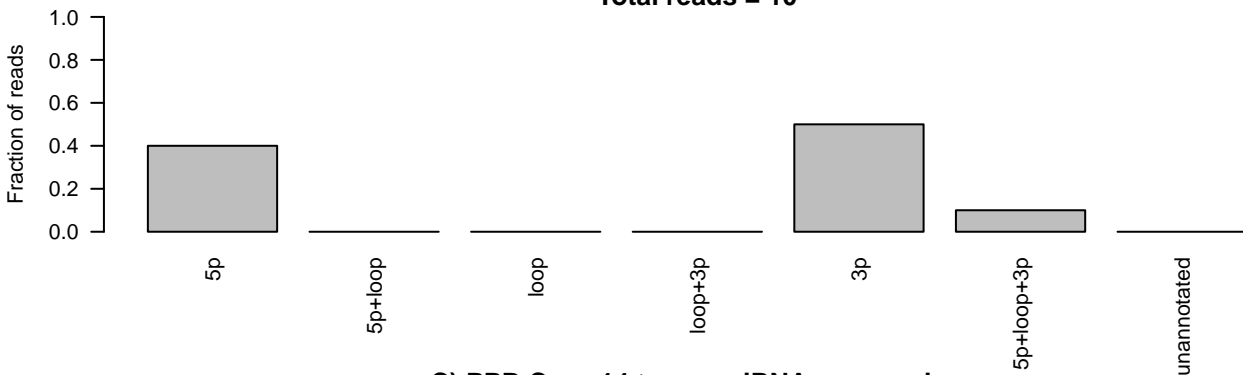

**C) PPB Case 14 tumor miRNA sequencing**  
ID=MI0000107\_1;accession\_number=MI0000107;Name=hsa-mir-29b-2  
Total reads = 1



**D) PPB Case 14 cell line miRNA sequencing**  
ID=MI0000107\_1;accession\_number=MI0000107;Name=hsa-mir-29b-2  
Total reads = 1



**B) Normal fibroblast miRNA sequencing**  
ID=MI0000787\_1;accession\_number=MI0000787;Name=hsa-mir-379  
Total reads = 10

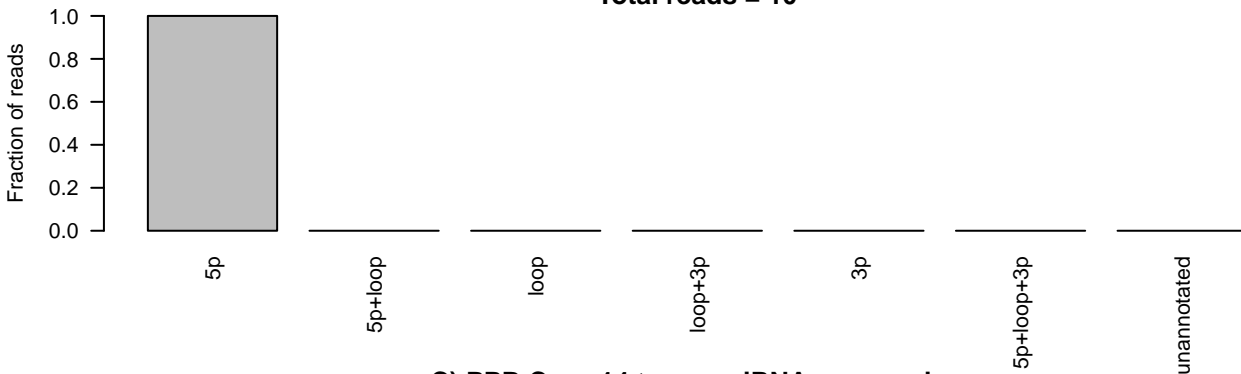

**C) PPB Case 14 tumor miRNA sequencing**  
ID=MI0000787\_1;accession\_number=MI0000787;Name=hsa-mir-379  
Total reads = 23

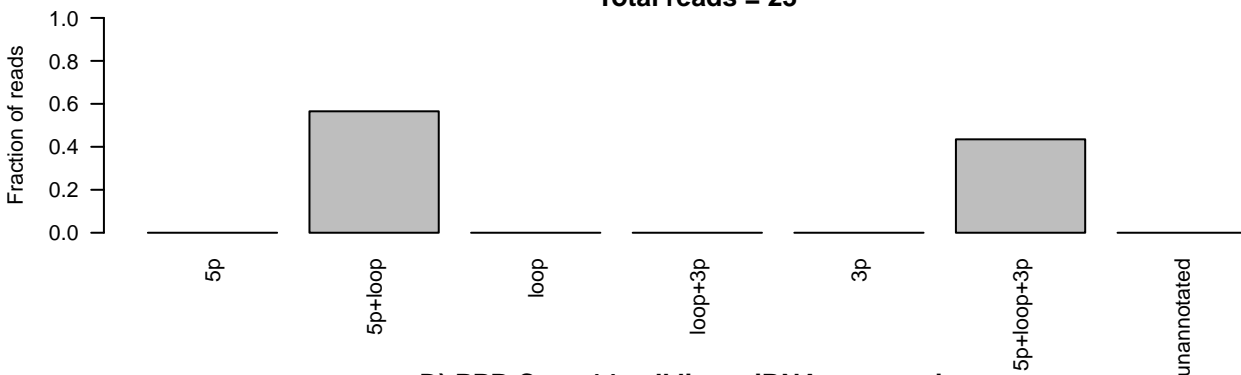

**D) PPB Case 14 cell line miRNA sequencing**  
ID=MI0000787\_1;accession\_number=MI0000787;Name=hsa-mir-379  
Total reads = 4

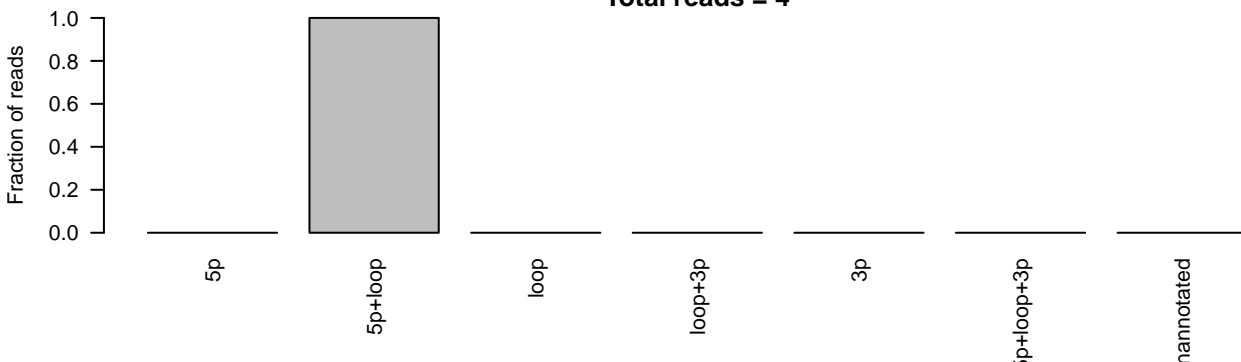

**B) Normal fibroblast miRNA sequencing**  
ID=MI0000788\_1;accession\_number=MI0000788;Name=hsa-mir-380  
Total reads = 10

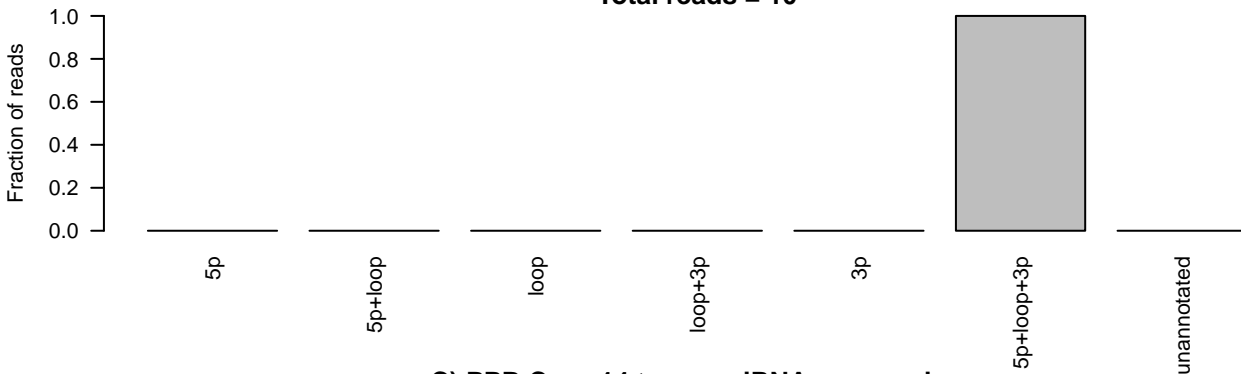

**C) PPB Case 14 tumor miRNA sequencing**  
ID=MI0000788\_1;accession\_number=MI0000788;Name=hsa-mir-380  
Total reads = 445

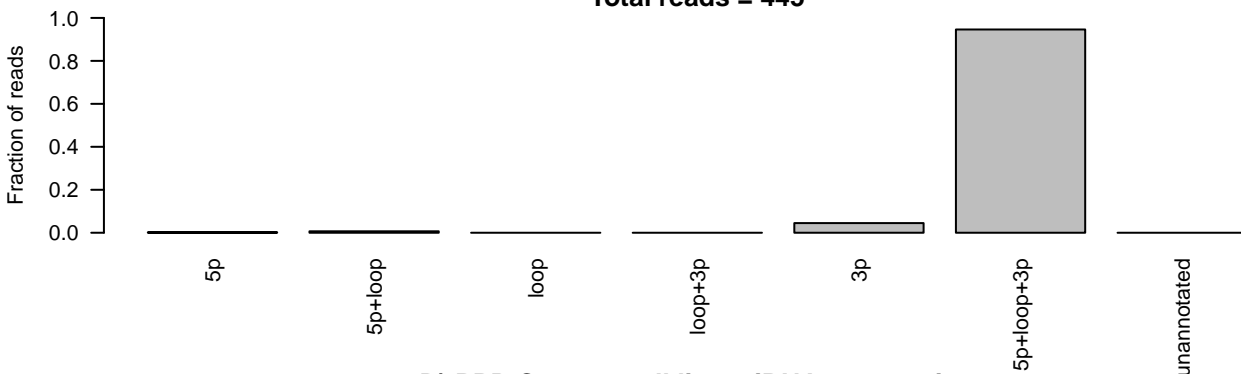

**D) PPB Case 14 cell line miRNA sequencing**  
ID=MI0000788\_1;accession\_number=MI0000788;Name=hsa-mir-380  
Total reads = 44

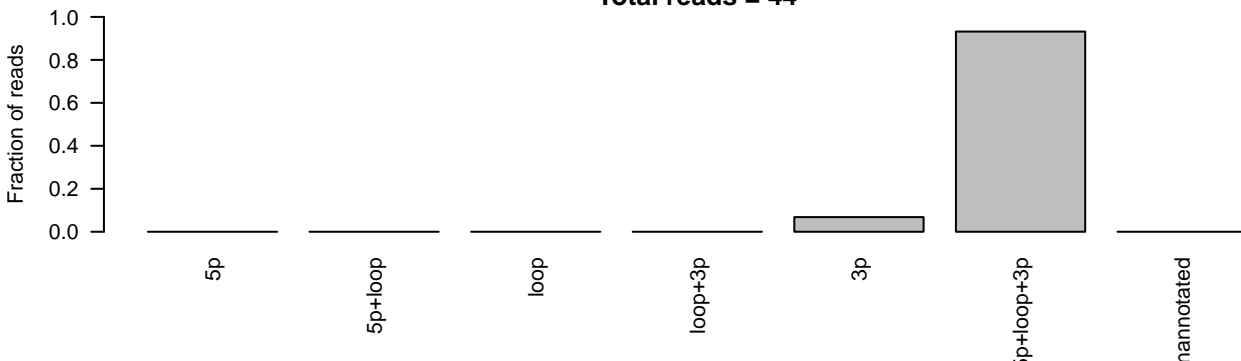

**B) Normal fibroblast miRNA sequencing**  
ID=MI0002465\_1;accession\_number=MI0002465;Name=hsa-mir-410  
Total reads = 10

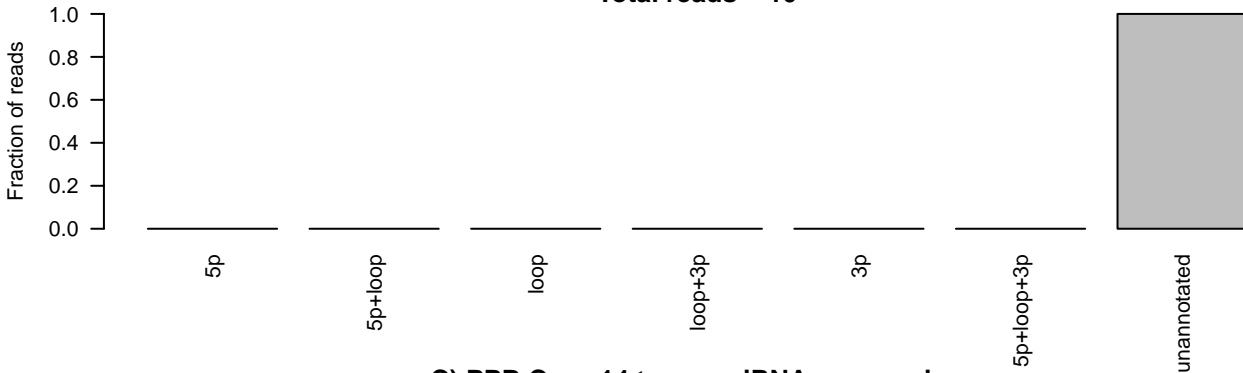

**C) PPB Case 14 tumor miRNA sequencing**  
ID=MI0002465\_1;accession\_number=MI0002465;Name=hsa-mir-410  
Total reads = 32

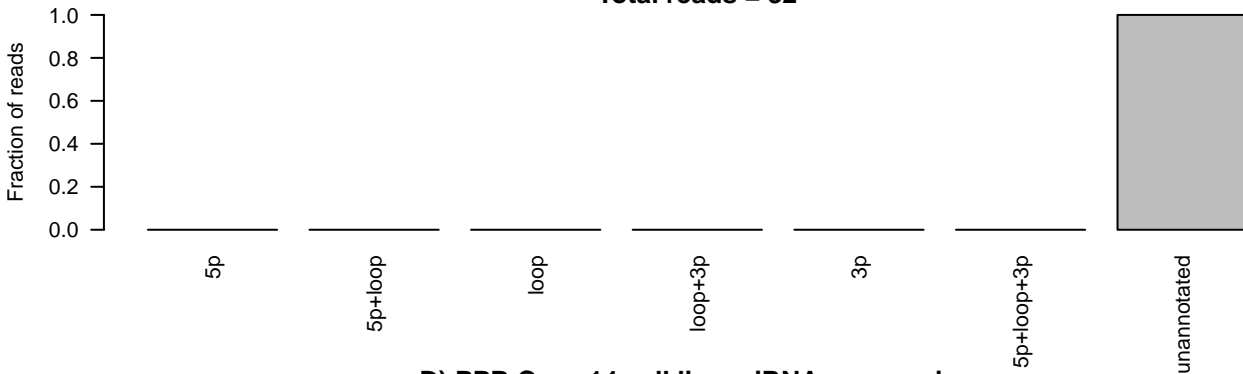

**D) PPB Case 14 cell line miRNA sequencing**  
ID=MI0002465\_1;accession\_number=MI0002465;Name=hsa-mir-410  
Total reads = 0

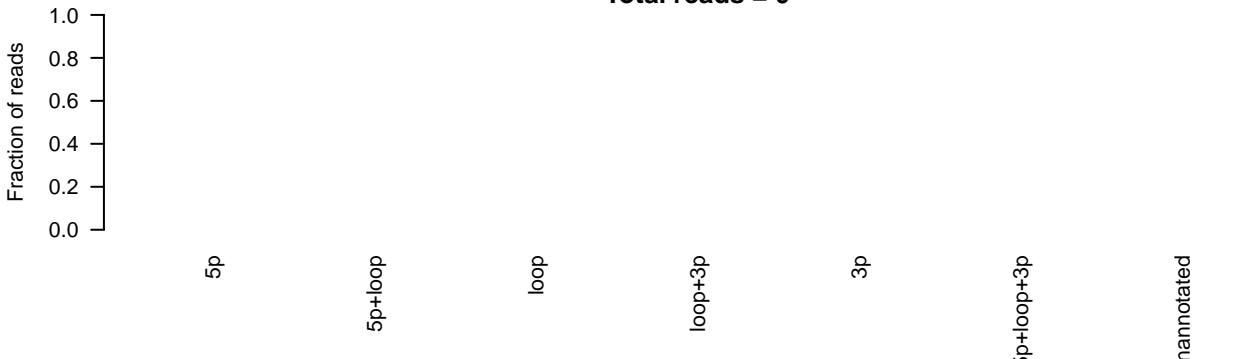

**B) Normal fibroblast miRNA sequencing**  
ID=MI0000727\_1;accession\_number=MI0000727;Name=hsa-mir-128-2  
Total reads = 10

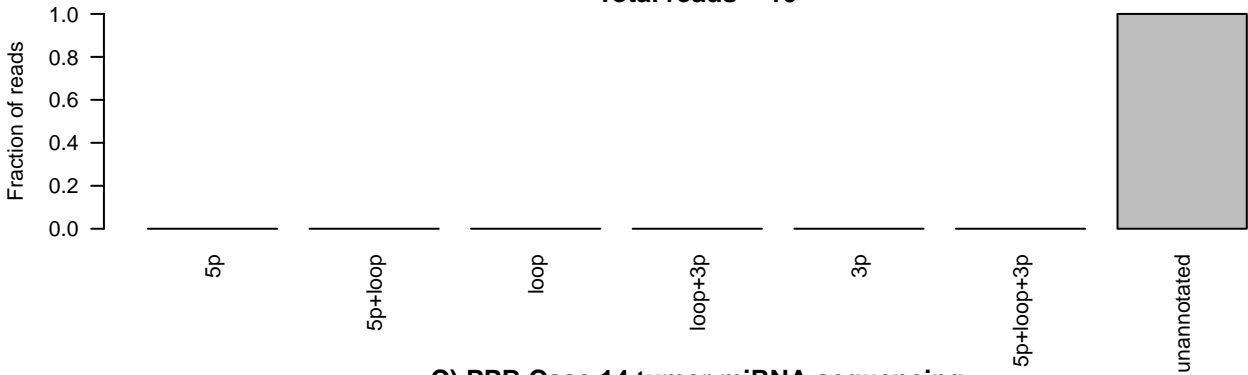

**C) PPB Case 14 tumor miRNA sequencing**  
ID=MI0000727\_1;accession\_number=MI0000727;Name=hsa-mir-128-2  
Total reads = 20

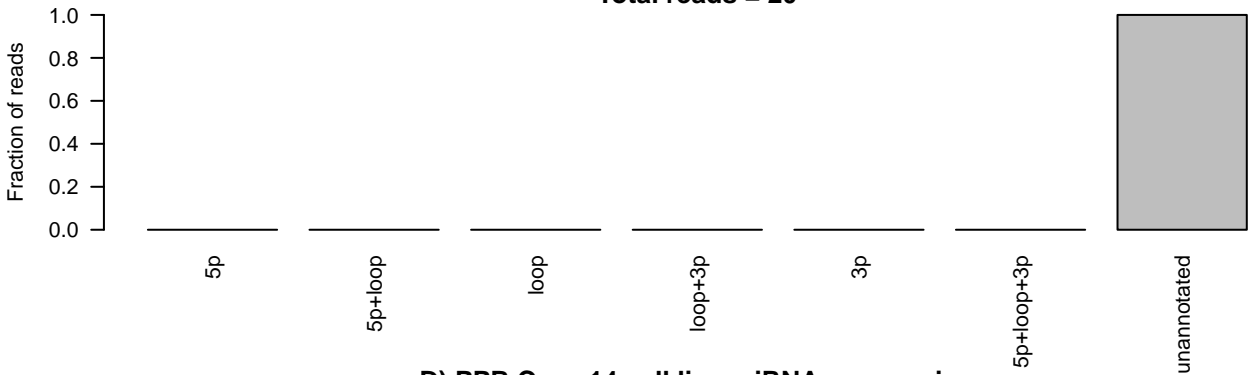

**D) PPB Case 14 cell line miRNA sequencing**  
ID=MI0000727\_1;accession\_number=MI0000727;Name=hsa-mir-128-2  
Total reads = 2

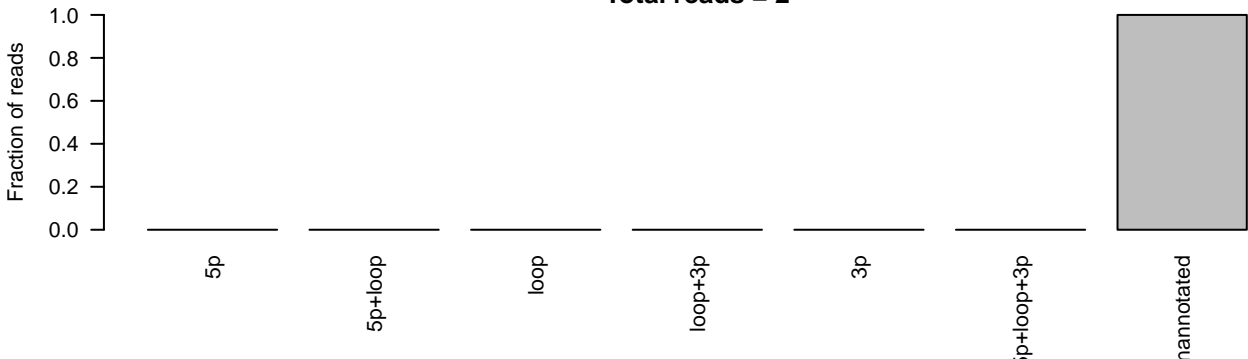

### B) Normal fibroblast miRNA sequencing

ID=MI0003839\_1;accession\_number=MI0003839;Name=hsa-mir-320b-2

Total reads = 9

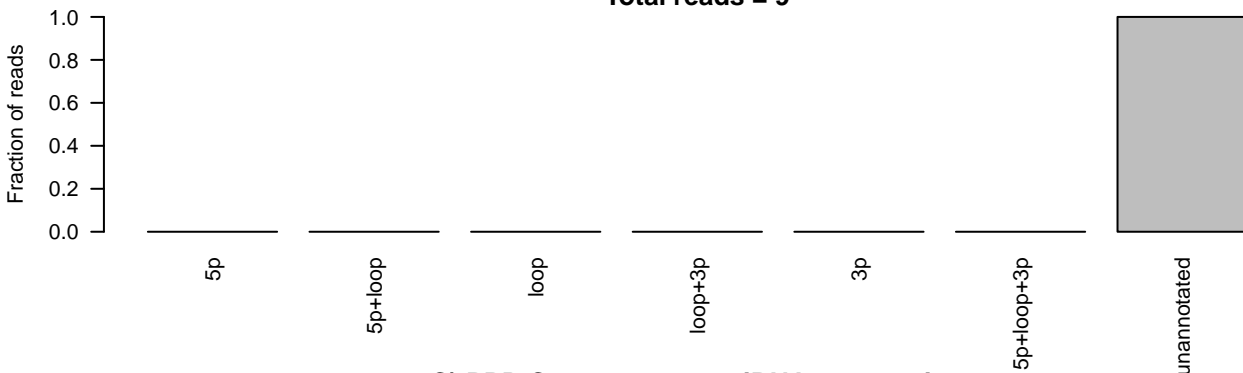

### C) PPB Case 14 tumor miRNA sequencing

ID=MI0003839\_1;accession\_number=MI0003839;Name=hsa-mir-320b-2

Total reads = 4

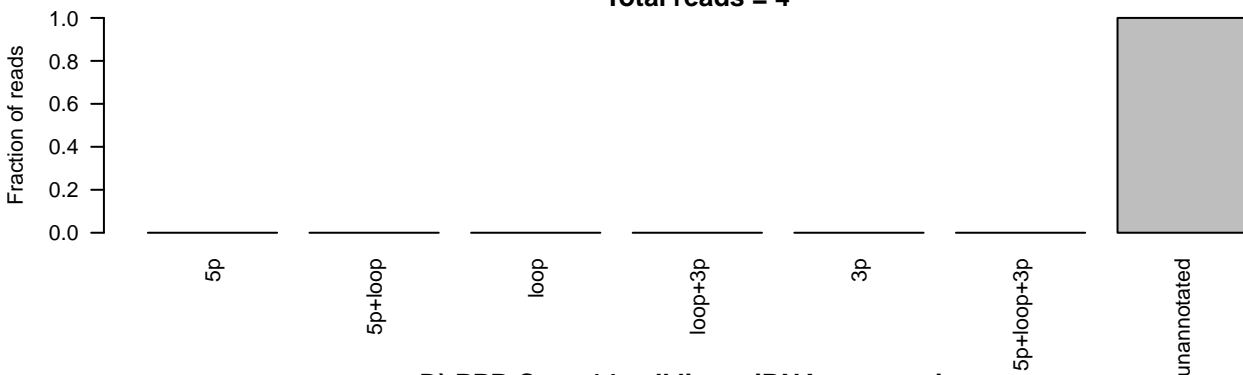

### D) PPB Case 14 cell line miRNA sequencing

ID=MI0003839\_1;accession\_number=MI0003839;Name=hsa-mir-320b-2

Total reads = 2

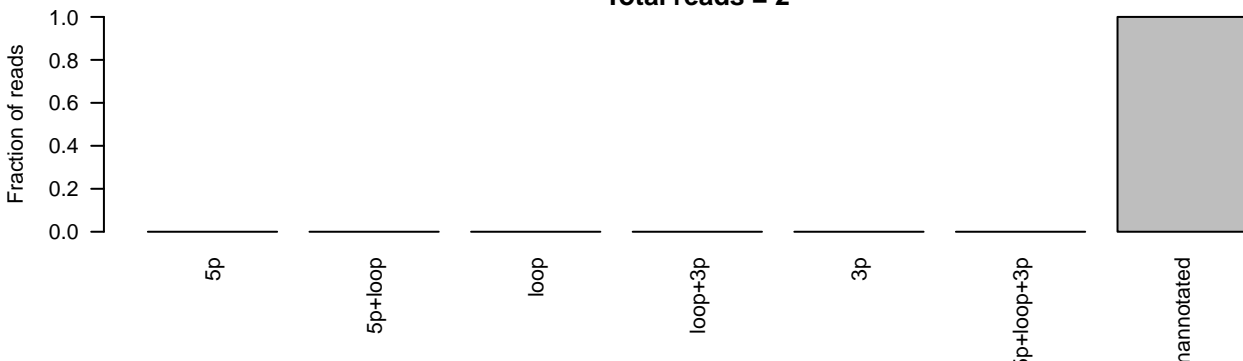

**B) Normal fibroblast miRNA sequencing**  
ID=MI0000807\_1;accession\_number=MI0000807;Name=hsa-mir-323a  
Total reads = 9

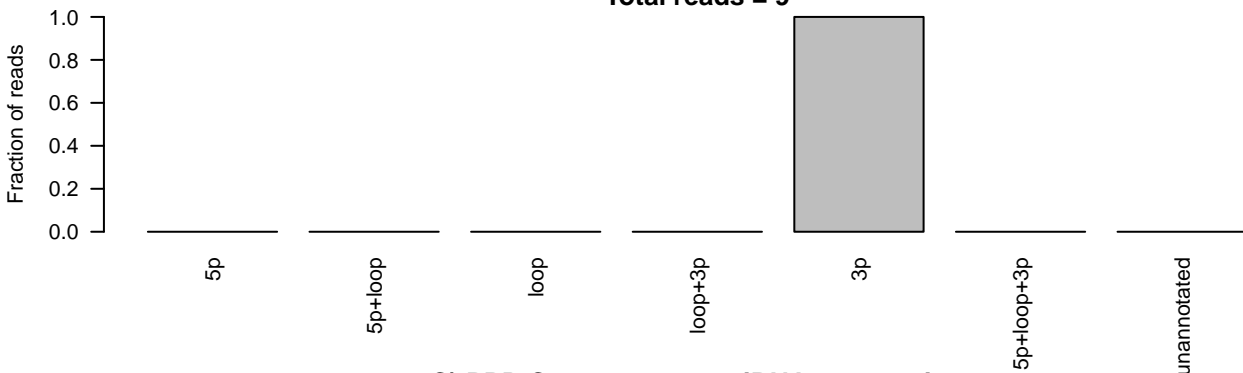

**C) PPB Case 14 tumor miRNA sequencing**  
ID=MI0000807\_1;accession\_number=MI0000807;Name=hsa-mir-323a  
Total reads = 103

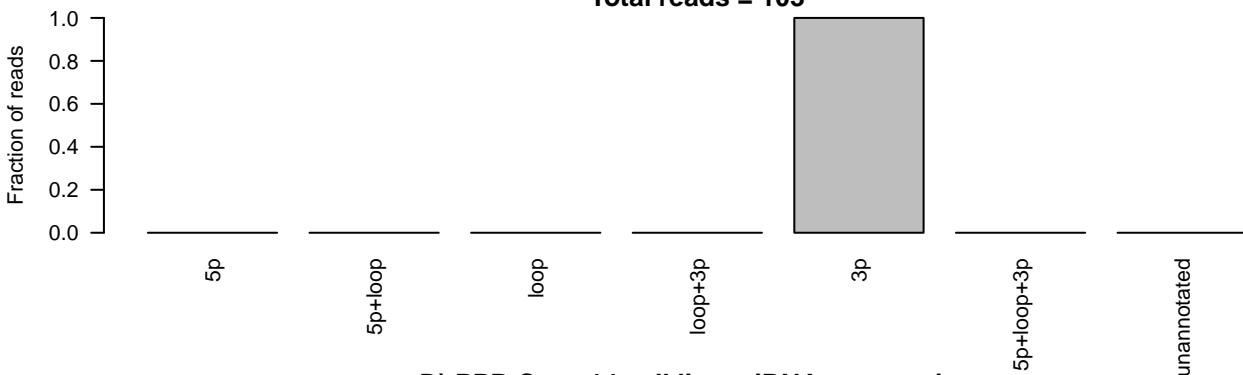

**D) PPB Case 14 cell line miRNA sequencing**  
ID=MI0000807\_1;accession\_number=MI0000807;Name=hsa-mir-323a  
Total reads = 48

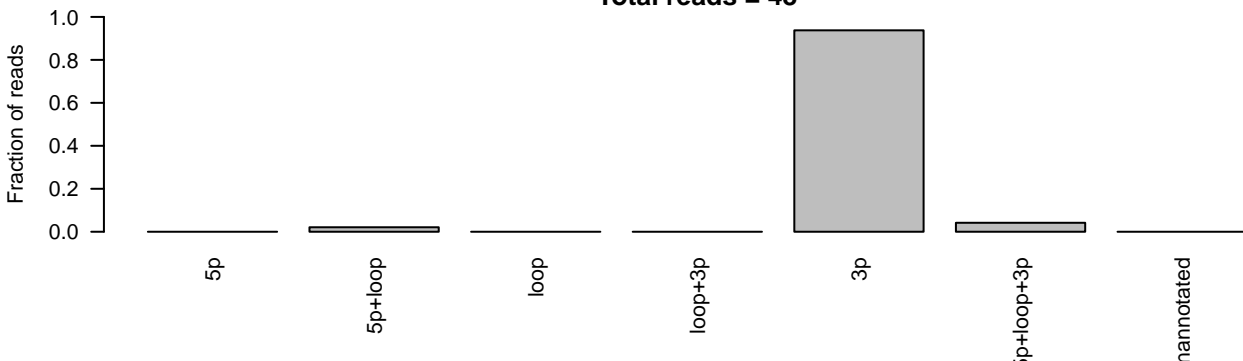

**B) Normal fibroblast miRNA sequencing**  
ID=MI0000254\_1;accession\_number=MI0000254;Name=hsa-mir-30c-2  
Total reads = 9

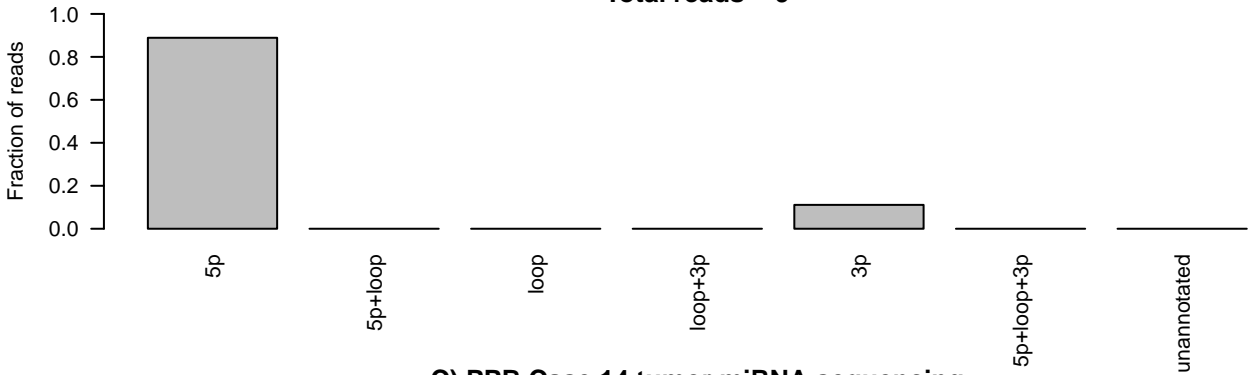

**C) PPB Case 14 tumor miRNA sequencing**  
ID=MI0000254\_1;accession\_number=MI0000254;Name=hsa-mir-30c-2  
Total reads = 1

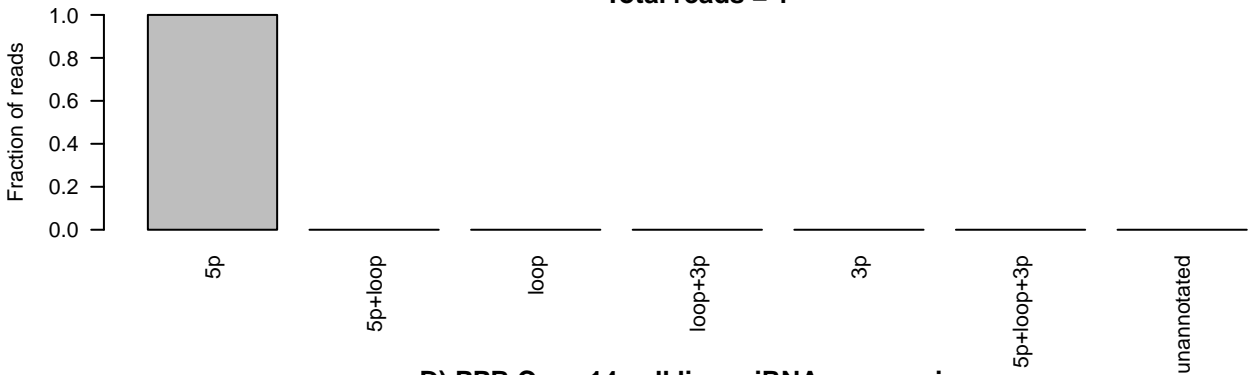

**D) PPB Case 14 cell line miRNA sequencing**  
ID=MI0000254\_1;accession\_number=MI0000254;Name=hsa-mir-30c-2  
Total reads = 2

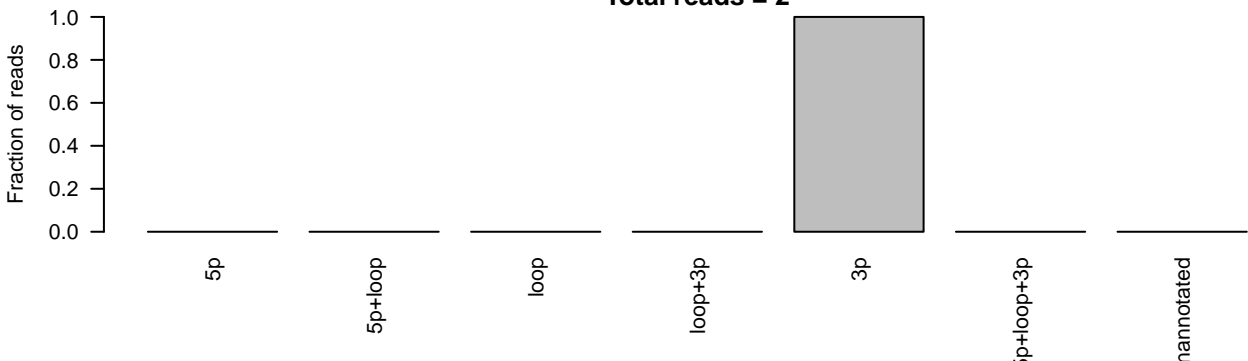



**B) Normal fibroblast miRNA sequencing**  
ID=MI0000809\_1;accession\_number=MI0000809;Name=hsa-mir-151a  
Total reads = 9

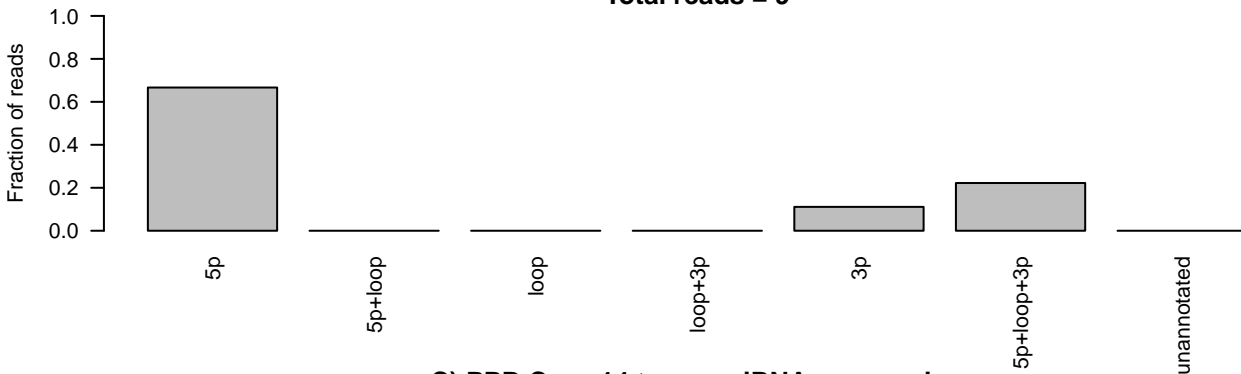

**C) PPB Case 14 tumor miRNA sequencing**  
ID=MI0000809\_1;accession\_number=MI0000809;Name=hsa-mir-151a  
Total reads = 9

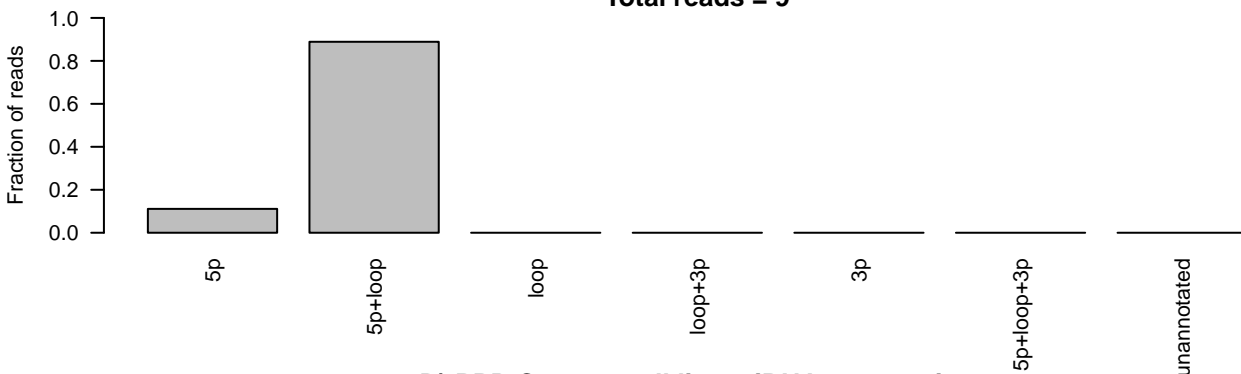

**D) PPB Case 14 cell line miRNA sequencing**  
ID=MI0000809\_1;accession\_number=MI0000809;Name=hsa-mir-151a  
Total reads = 25

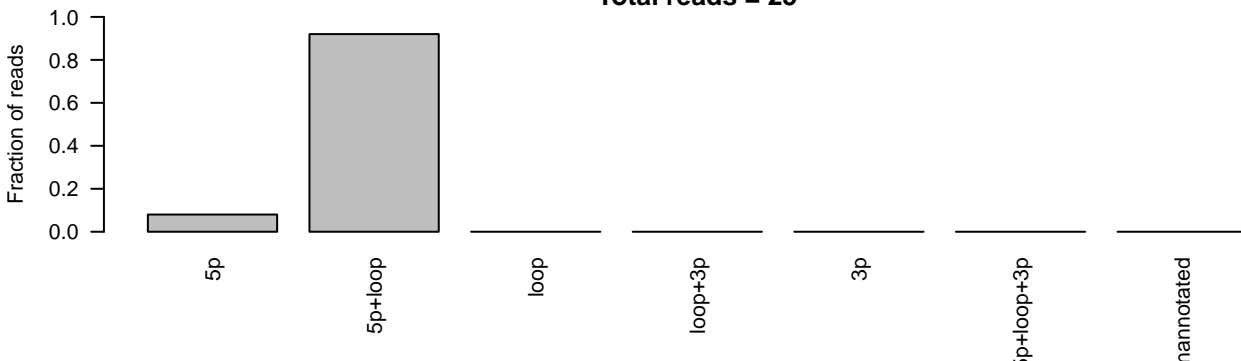

**B) Normal fibroblast miRNA sequencing**  
ID=MI0020358\_1;accession\_number=MI0020358;Name=hsa-mir-6081  
Total reads = 9

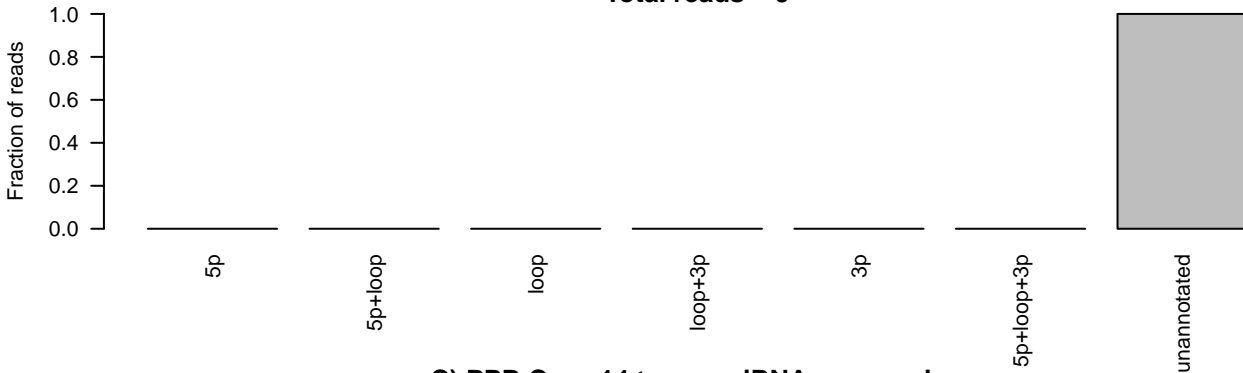

**C) PPB Case 14 tumor miRNA sequencing**  
ID=MI0020358\_1;accession\_number=MI0020358;Name=hsa-mir-6081  
Total reads = 8

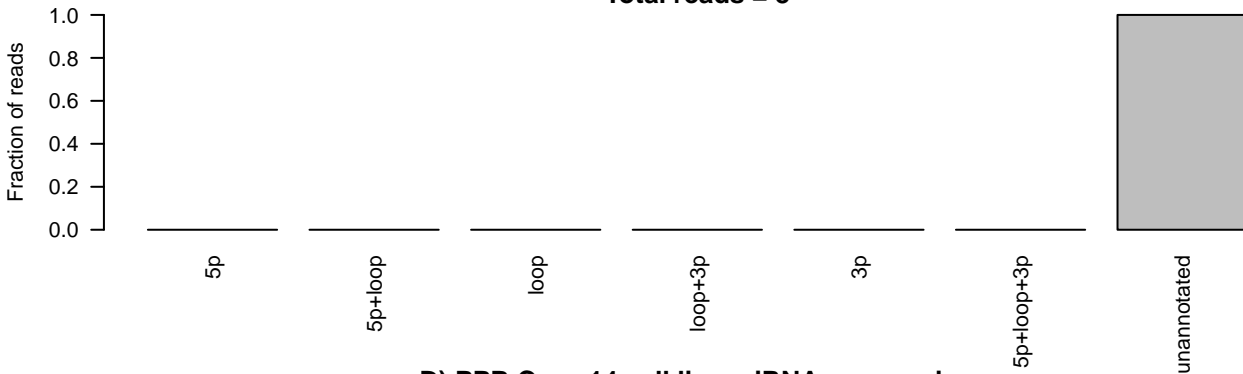

**D) PPB Case 14 cell line miRNA sequencing**  
ID=MI0020358\_1;accession\_number=MI0020358;Name=hsa-mir-6081  
Total reads = 15

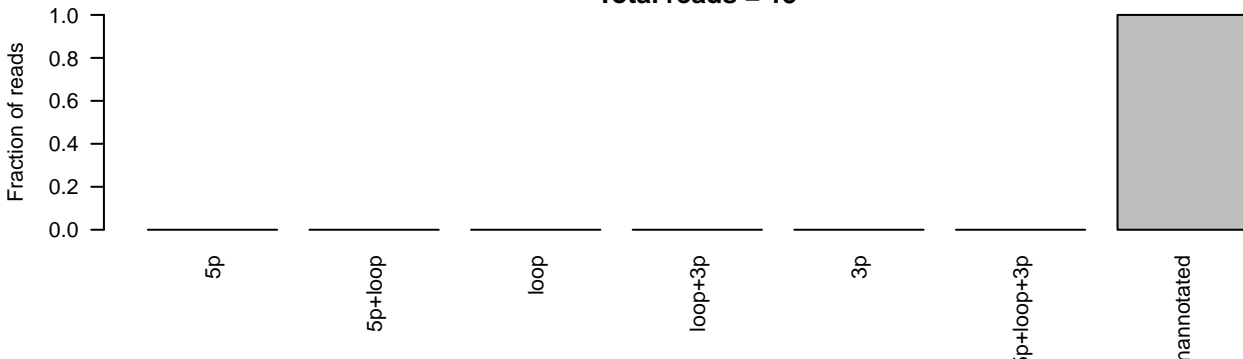

**B) Normal fibroblast miRNA sequencing**  
ID=MI0000683\_1;accession\_number=MI0000683;Name=hsa-mir-181b-2  
Total reads = 9

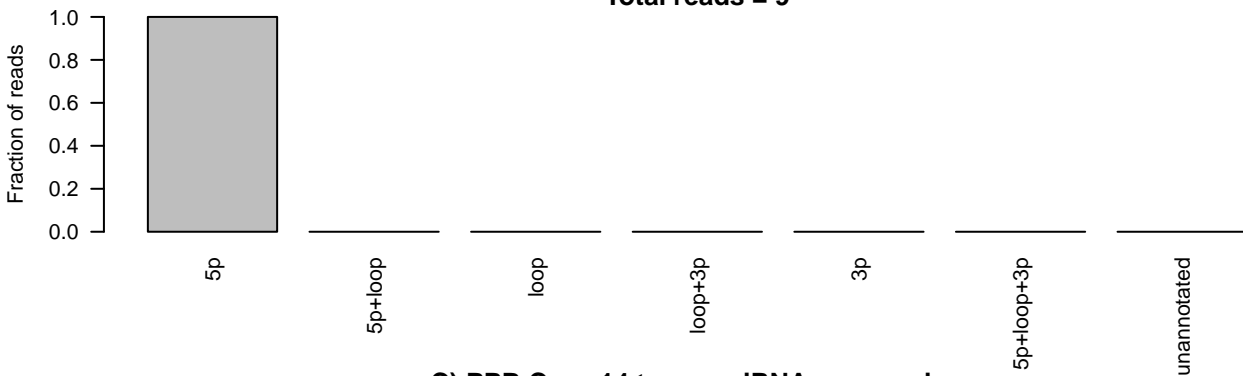

**C) PPB Case 14 tumor miRNA sequencing**  
ID=MI0000683\_1;accession\_number=MI0000683;Name=hsa-mir-181b-2  
Total reads = 0

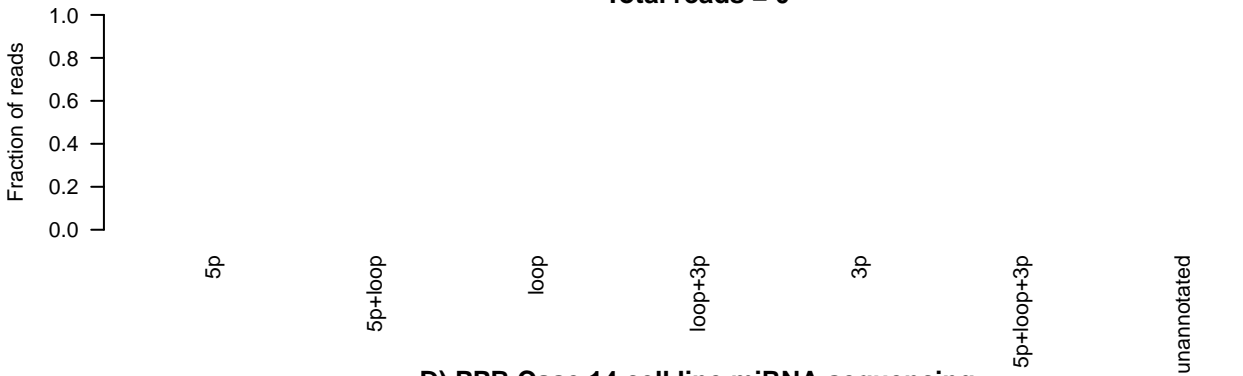

**D) PPB Case 14 cell line miRNA sequencing**  
ID=MI0000683\_1;accession\_number=MI0000683;Name=hsa-mir-181b-2  
Total reads = 0

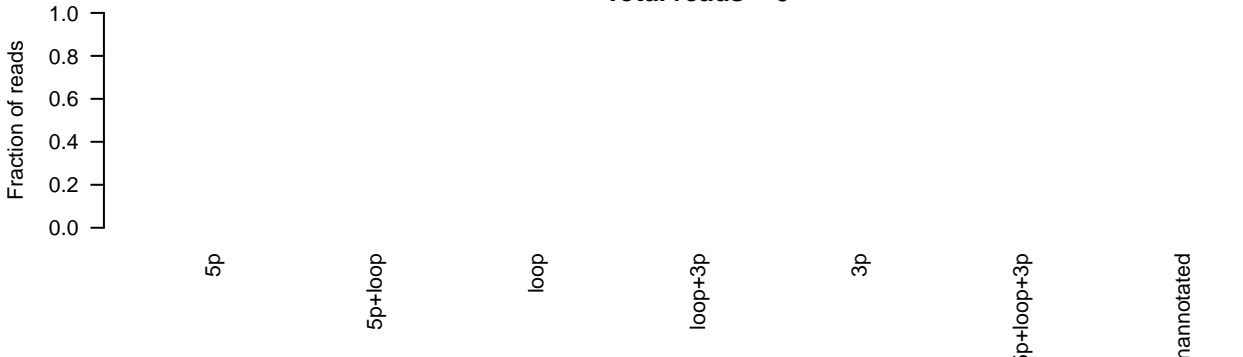

**B) Normal fibroblast miRNA sequencing**  
ID=MI0003560\_1;accession\_number=MI0003560;Name=hsa-mir-92b  
Total reads = 8

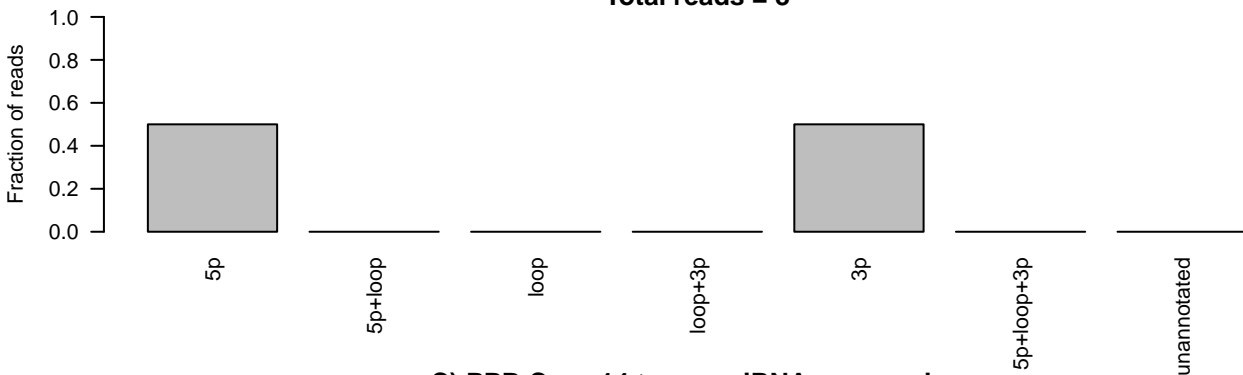

**C) PPB Case 14 tumor miRNA sequencing**  
ID=MI0003560\_1;accession\_number=MI0003560;Name=hsa-mir-92b  
Total reads = 1

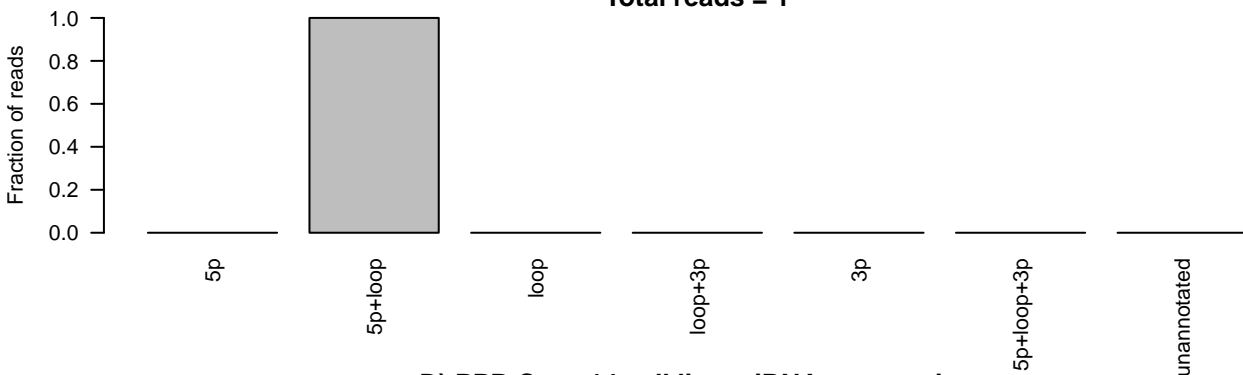

**D) PPB Case 14 cell line miRNA sequencing**  
ID=MI0003560\_1;accession\_number=MI0003560;Name=hsa-mir-92b  
Total reads = 1

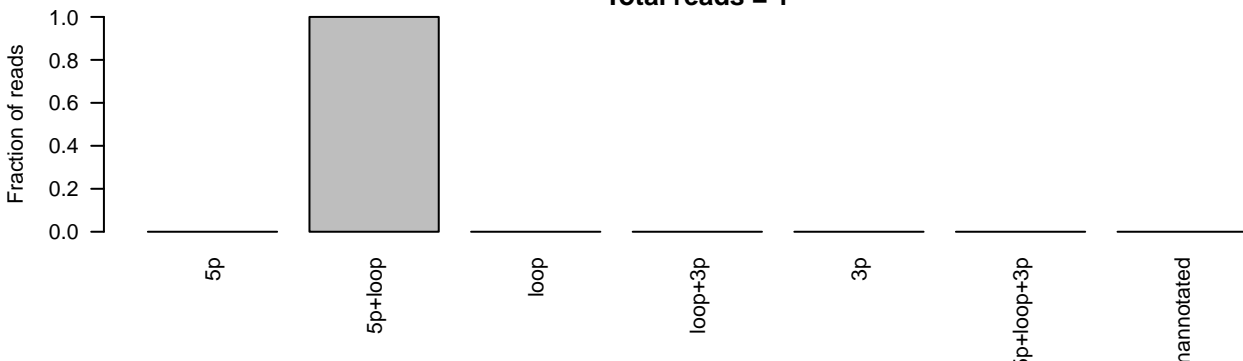

**B) Normal fibroblast miRNA sequencing**  
ID=MI0003675\_1;accession\_number=MI0003675;Name=hsa-mir-411  
Total reads = 8

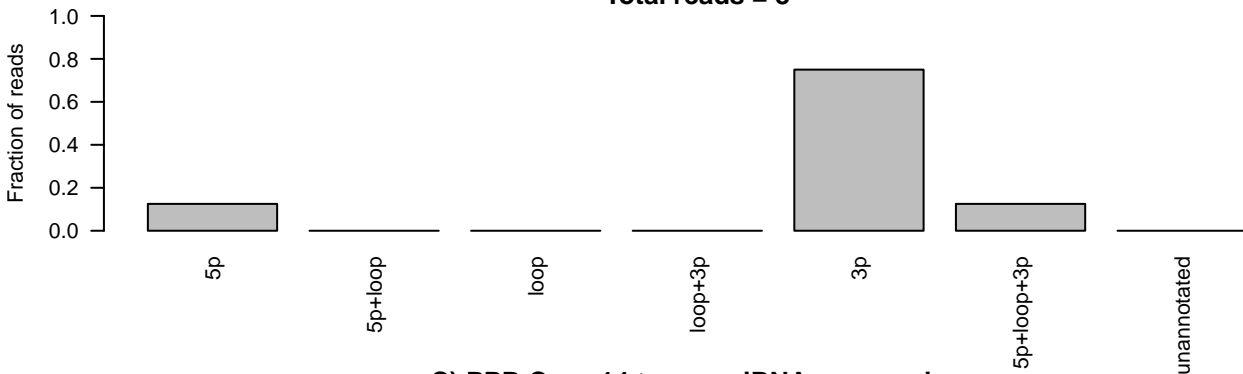

**C) PPB Case 14 tumor miRNA sequencing**  
ID=MI0003675\_1;accession\_number=MI0003675;Name=hsa-mir-411  
Total reads = 86

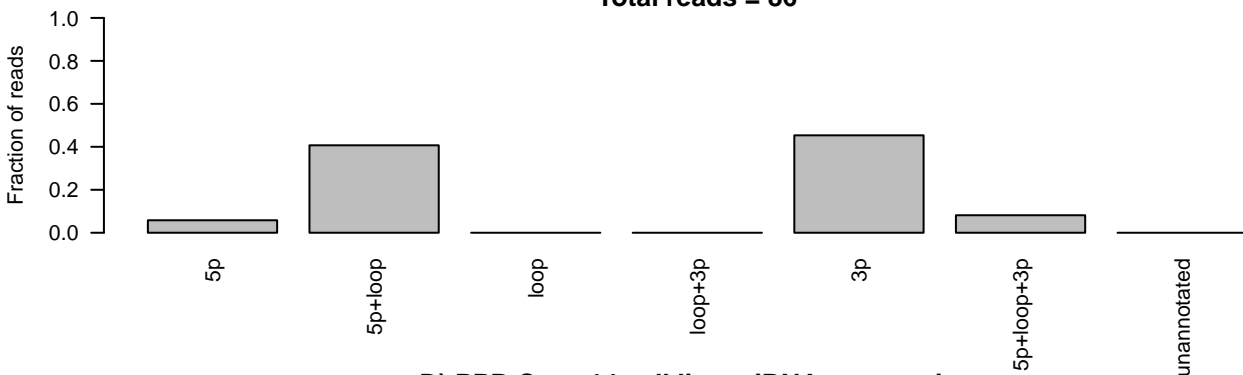

**D) PPB Case 14 cell line miRNA sequencing**  
ID=MI0003675\_1;accession\_number=MI0003675;Name=hsa-mir-411  
Total reads = 16

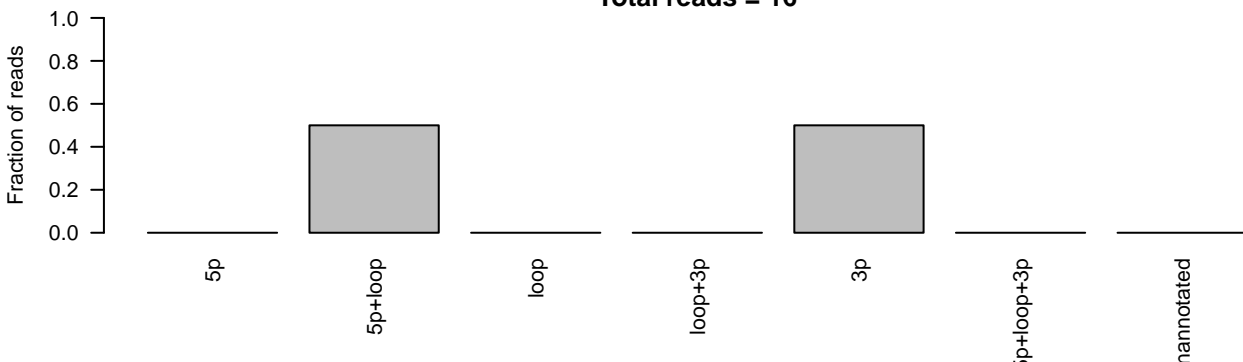

**B) Normal fibroblast miRNA sequencing**  
ID=MI0002464\_1;accession\_number=MI0002464;Name=hsa-mir-412  
Total reads = 0



**C) PPB Case 14 tumor miRNA sequencing**  
ID=MI0002464\_1;accession\_number=MI0002464;Name=hsa-mir-412  
Total reads = 0

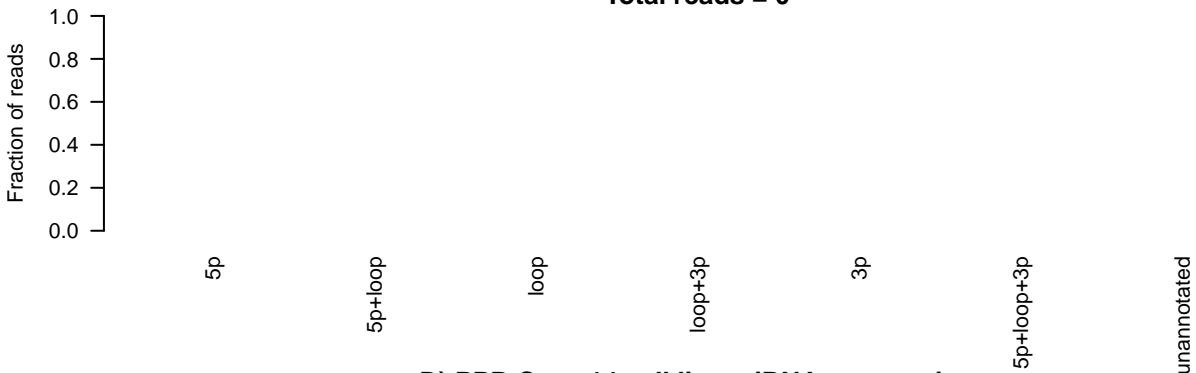

**D) PPB Case 14 cell line miRNA sequencing**  
ID=MI0002464\_1;accession\_number=MI0002464;Name=hsa-mir-412  
Total reads = 0



**B) Normal fibroblast miRNA sequencing**  
ID=MI0000454\_1;accession\_number=MI0000454;Name=hsa-mir-137  
Total reads = 7

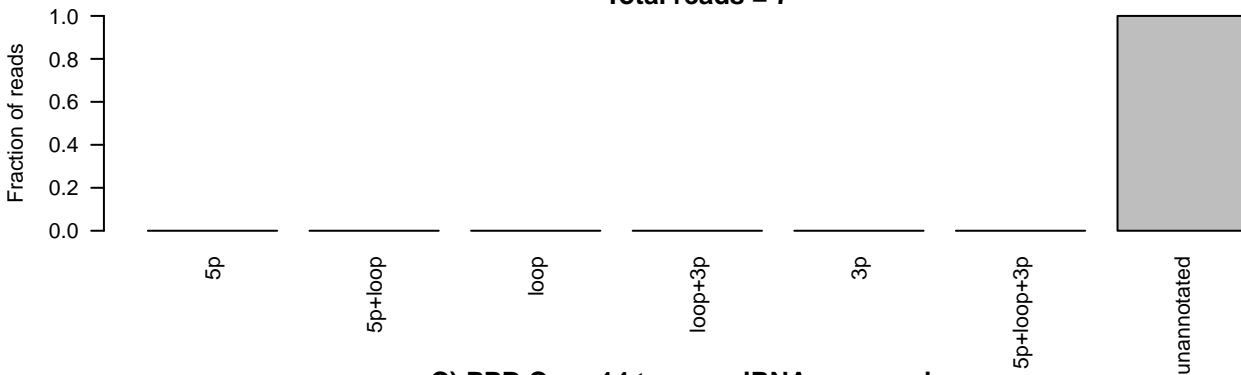

**C) PPB Case 14 tumor miRNA sequencing**  
ID=MI0000454\_1;accession\_number=MI0000454;Name=hsa-mir-137  
Total reads = 0



**D) PPB Case 14 cell line miRNA sequencing**  
ID=MI0000454\_1;accession\_number=MI0000454;Name=hsa-mir-137  
Total reads = 0



**B) Normal fibroblast miRNA sequencing**  
ID=MI0000074\_1;accession\_number=MI0000074;Name=hsa-mir-19b-1  
Total reads = 7

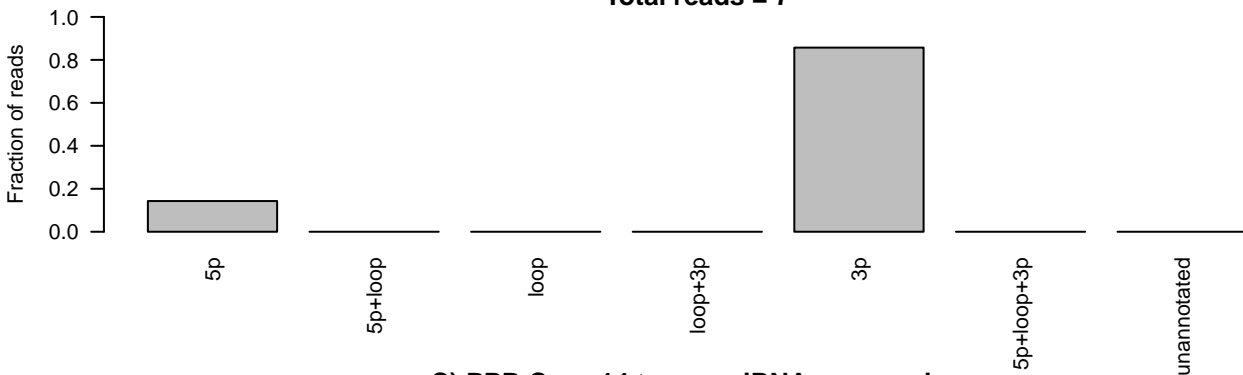

**C) PPB Case 14 tumor miRNA sequencing**  
ID=MI0000074\_1;accession\_number=MI0000074;Name=hsa-mir-19b-1  
Total reads = 58

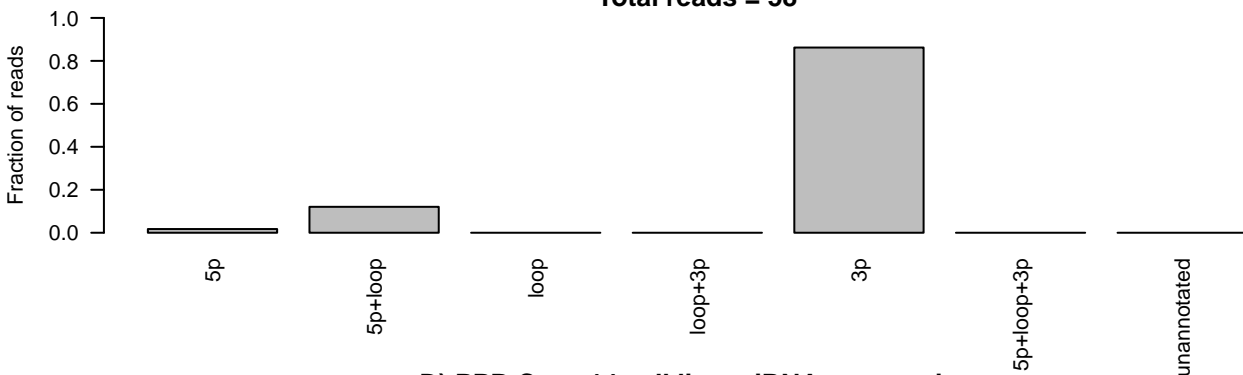

**D) PPB Case 14 cell line miRNA sequencing**  
ID=MI0000074\_1;accession\_number=MI0000074;Name=hsa-mir-19b-1  
Total reads = 9

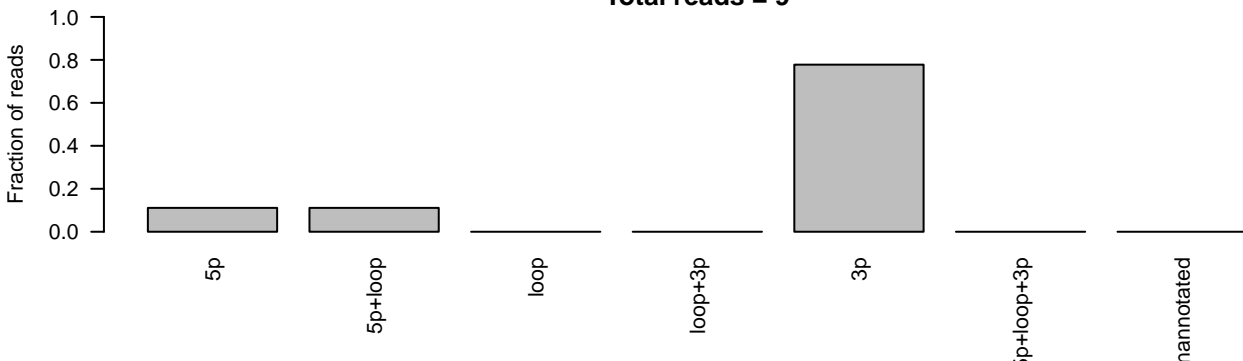



**B) Normal fibroblast miRNA sequencing**  
ID=MI0003639\_1;accession\_number=MI0003639;Name=hsa-mir-625  
Total reads = 7

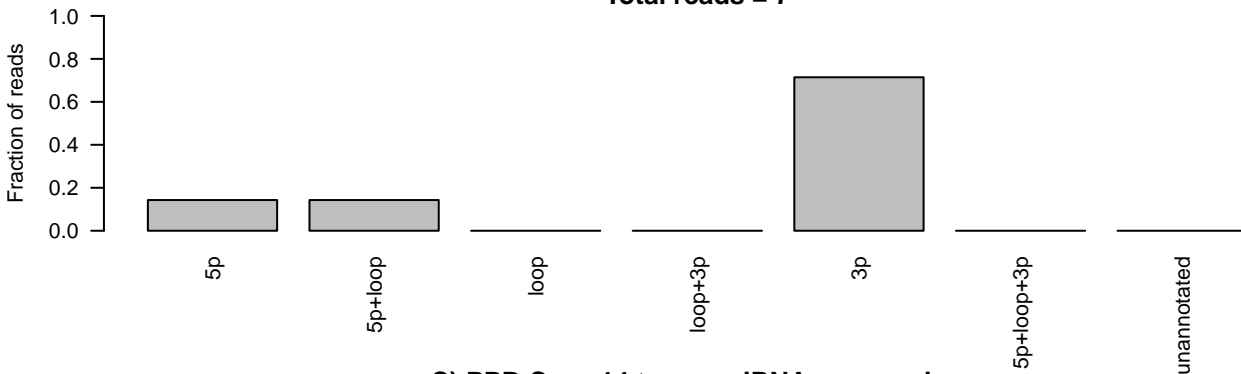

**C) PPB Case 14 tumor miRNA sequencing**  
ID=MI0003639\_1;accession\_number=MI0003639;Name=hsa-mir-625  
Total reads = 0



**D) PPB Case 14 cell line miRNA sequencing**  
ID=MI0003639\_1;accession\_number=MI0003639;Name=hsa-mir-625  
Total reads = 1



**B) Normal fibroblast miRNA sequencing**  
ID=MI0003529\_1;accession\_number=MI0003529;Name=hsa-mir-376a-2  
Total reads = 7

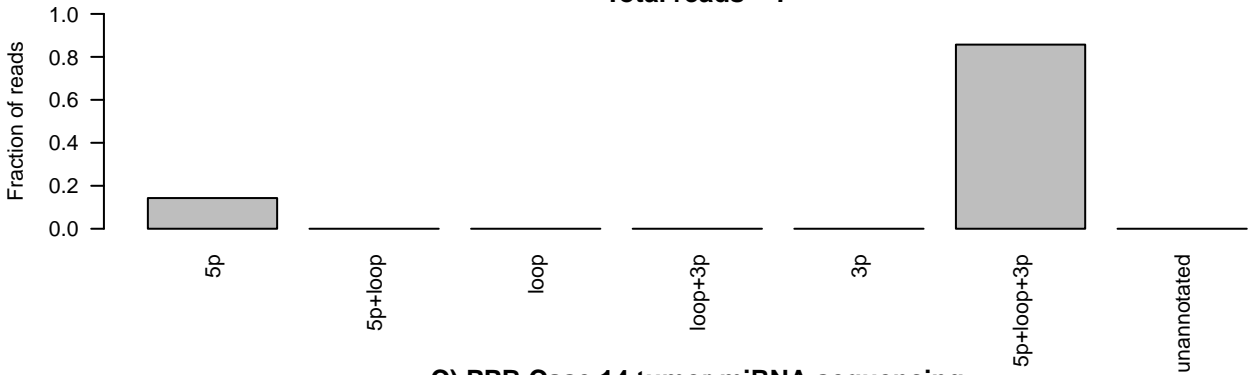

**C) PPB Case 14 tumor miRNA sequencing**  
ID=MI0003529\_1;accession\_number=MI0003529;Name=hsa-mir-376a-2  
Total reads = 200

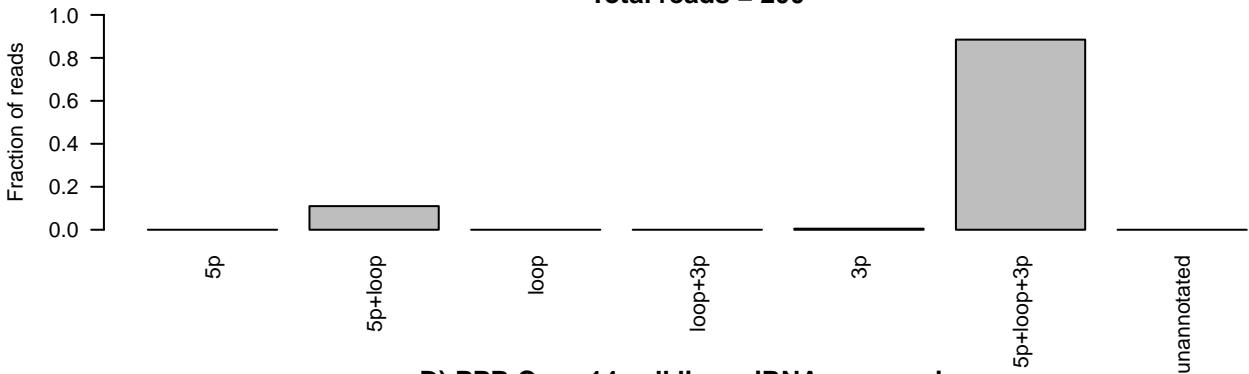

**D) PPB Case 14 cell line miRNA sequencing**  
ID=MI0003529\_1;accession\_number=MI0003529;Name=hsa-mir-376a-2  
Total reads = 29

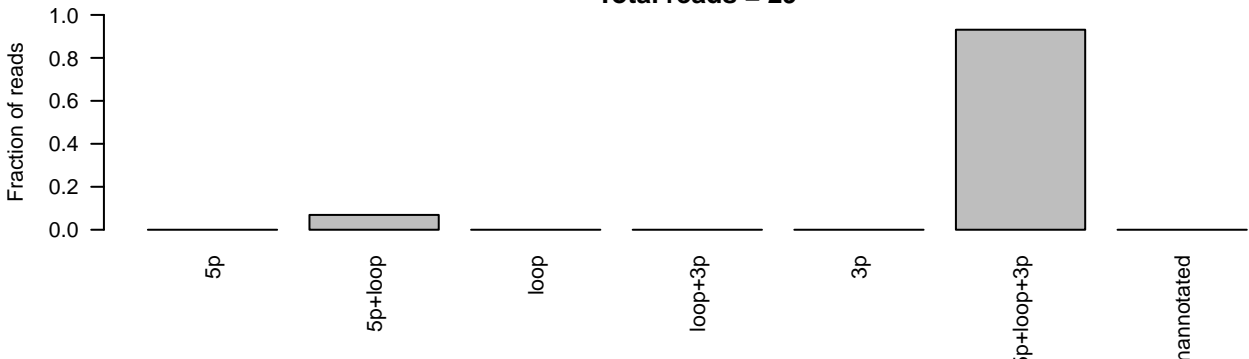

**B) Normal fibroblast miRNA sequencing**  
ID=MI0000789\_1;accession\_number=MI0000789;Name=hsa-mir-381  
Total reads = 7

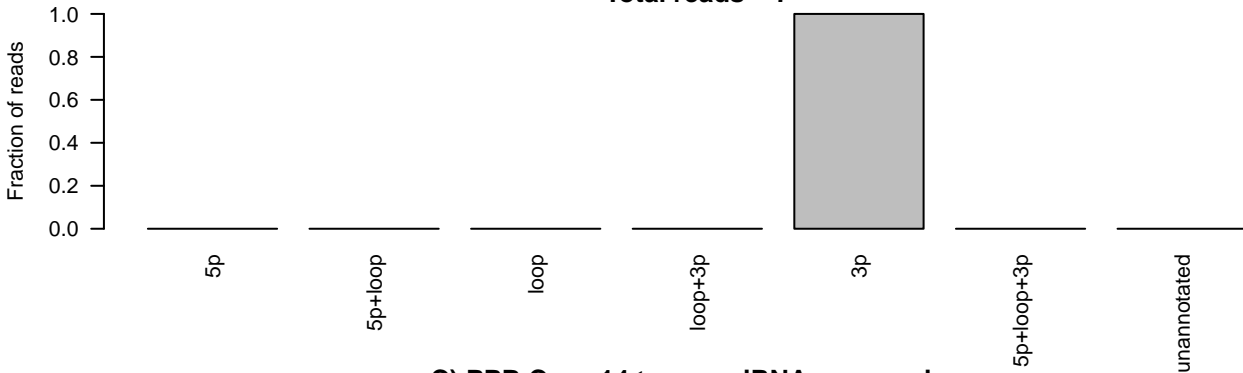

**C) PPB Case 14 tumor miRNA sequencing**  
ID=MI0000789\_1;accession\_number=MI0000789;Name=hsa-mir-381  
Total reads = 38

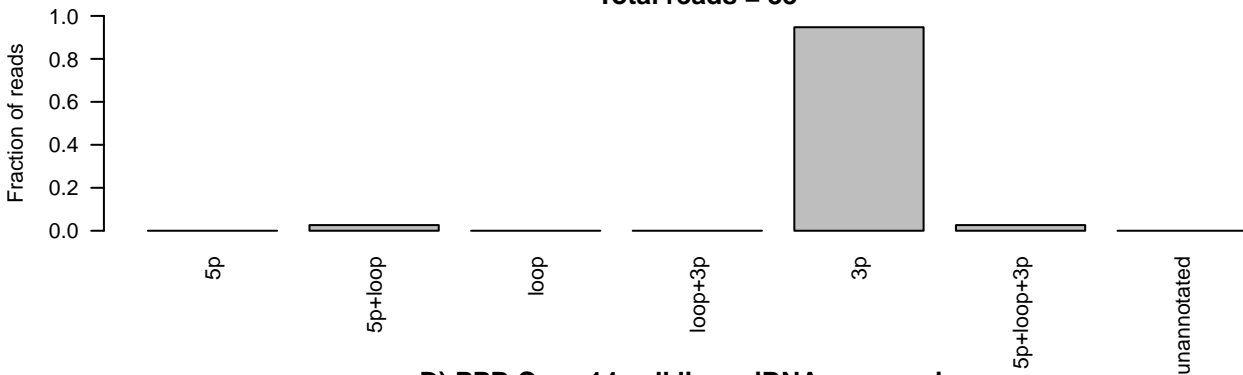

**D) PPB Case 14 cell line miRNA sequencing**  
ID=MI0000789\_1;accession\_number=MI0000789;Name=hsa-mir-381  
Total reads = 2

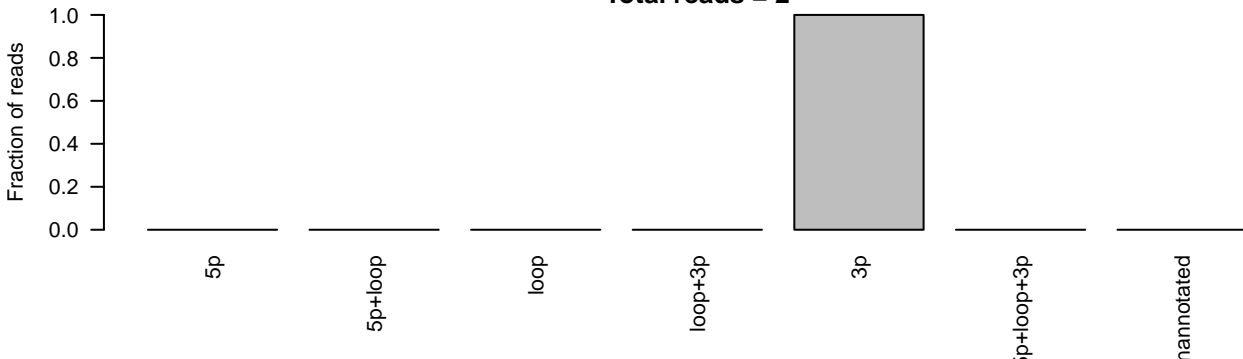

**B) Normal fibroblast miRNA sequencing**  
ID=MI0000288\_1;accession\_number=MI0000288;Name=hsa-mir-212  
Total reads = 7

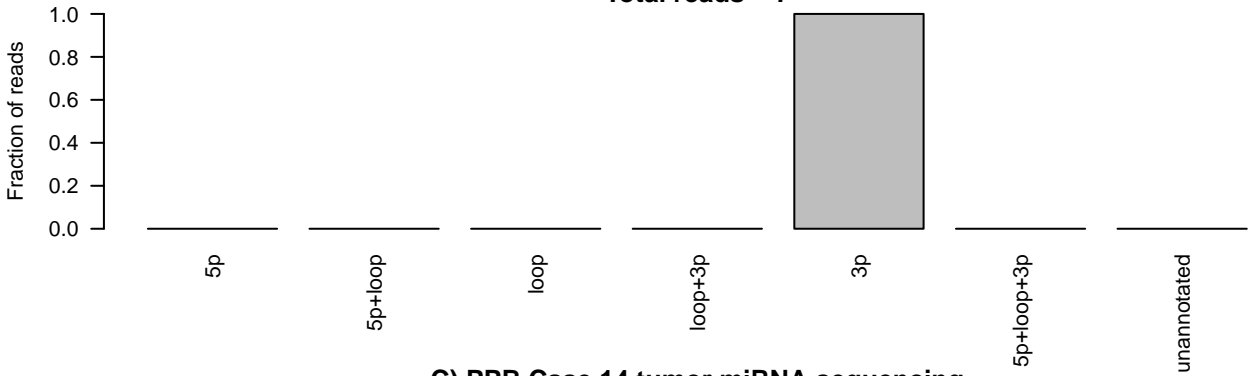

**C) PPB Case 14 tumor miRNA sequencing**  
ID=MI0000288\_1;accession\_number=MI0000288;Name=hsa-mir-212  
Total reads = 0

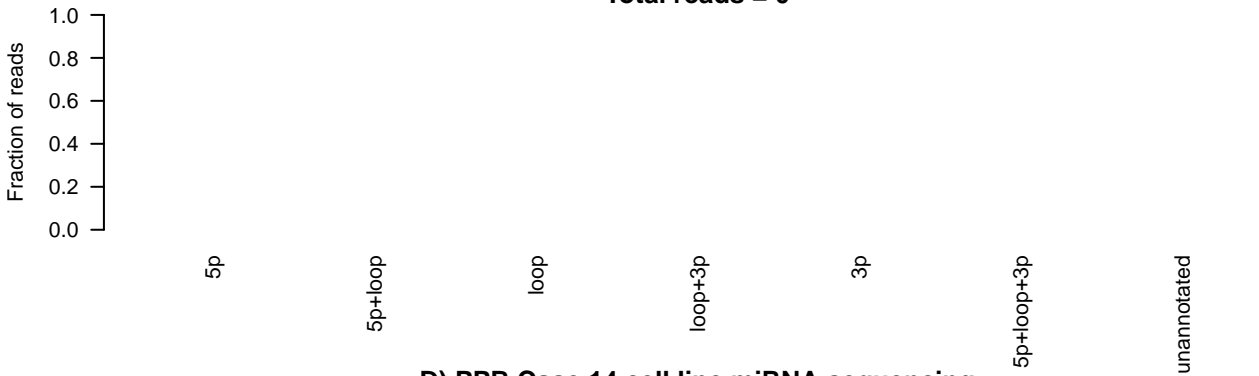

**D) PPB Case 14 cell line miRNA sequencing**  
ID=MI0000288\_1;accession\_number=MI0000288;Name=hsa-mir-212  
Total reads = 0



**B) Normal fibroblast miRNA sequencing**  
ID=MI0006313\_1;accession\_number=MI0006313;Name=hsa-mir-1226  
Total reads = 7

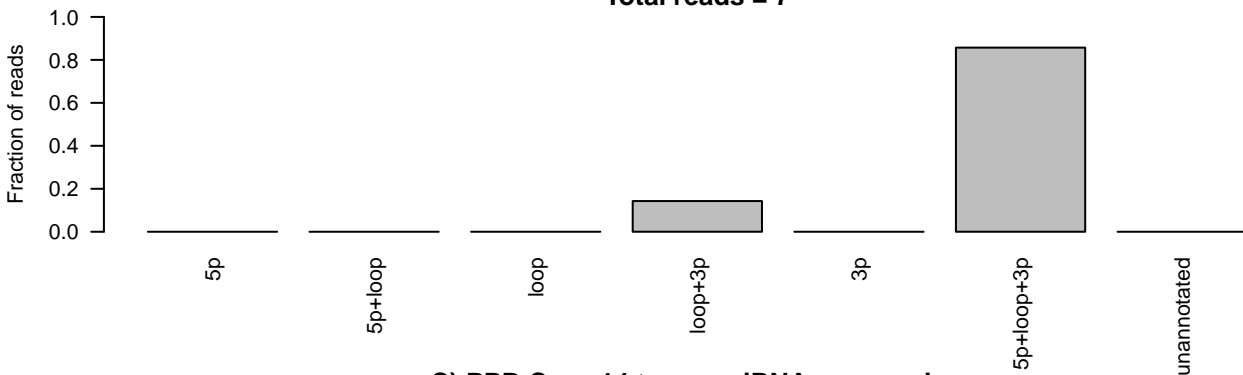

**C) PPB Case 14 tumor miRNA sequencing**  
ID=MI0006313\_1;accession\_number=MI0006313;Name=hsa-mir-1226  
Total reads = 74

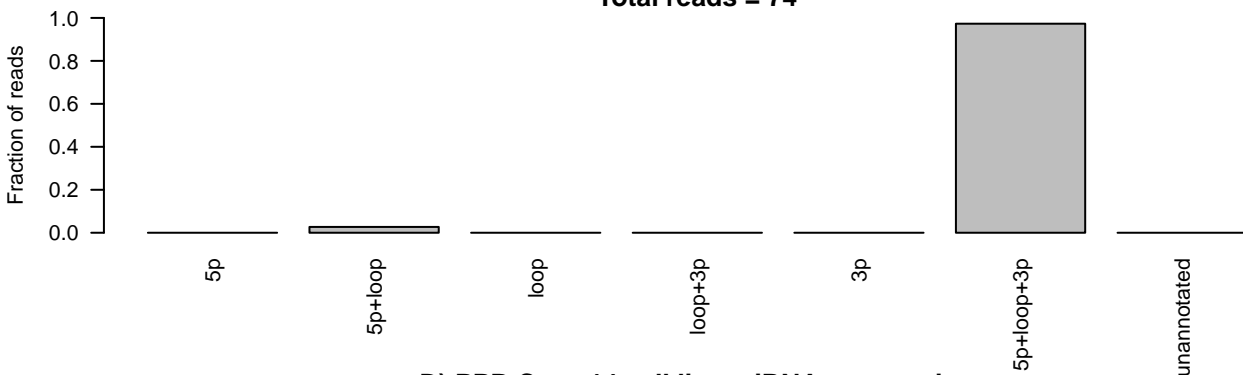

**D) PPB Case 14 cell line miRNA sequencing**  
ID=MI0006313\_1;accession\_number=MI0006313;Name=hsa-mir-1226  
Total reads = 3

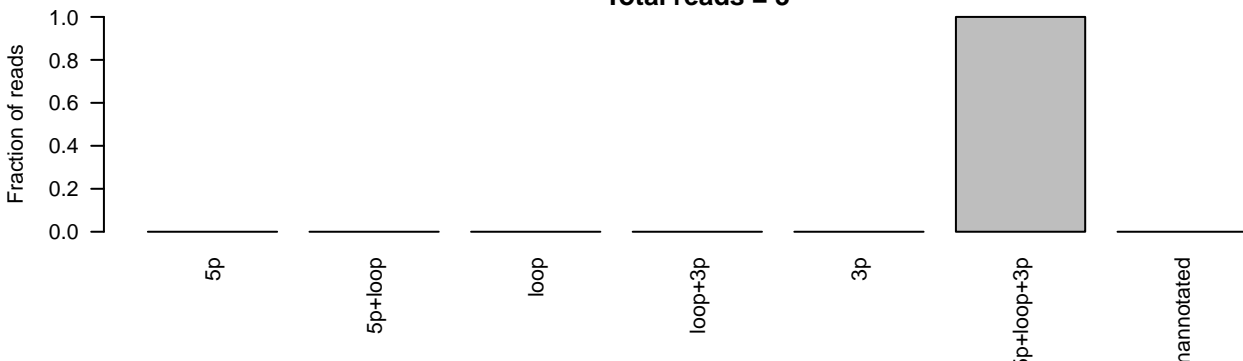

**B) Normal fibroblast miRNA sequencing**  
ID=MI0000782\_1;accession\_number=MI0000782;Name=hsa-mir-374a  
Total reads = 7

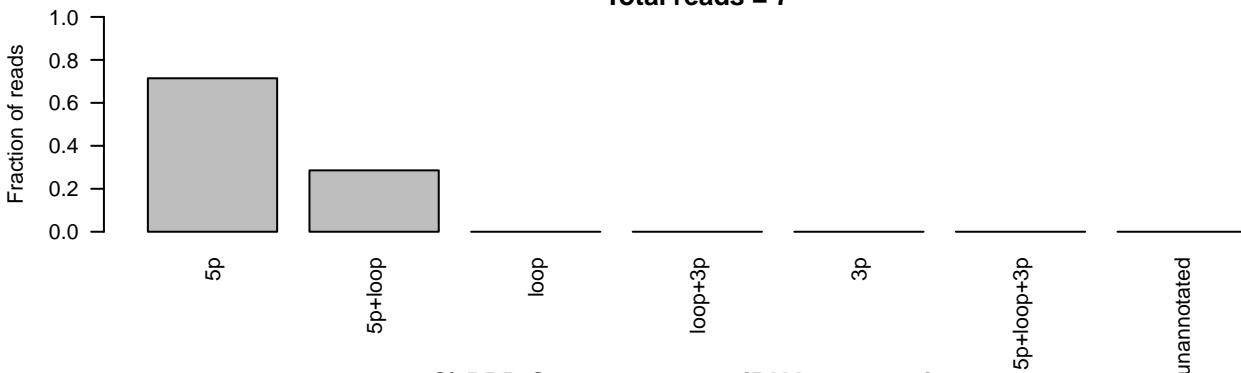

**C) PPB Case 14 tumor miRNA sequencing**  
ID=MI0000782\_1;accession\_number=MI0000782;Name=hsa-mir-374a  
Total reads = 23

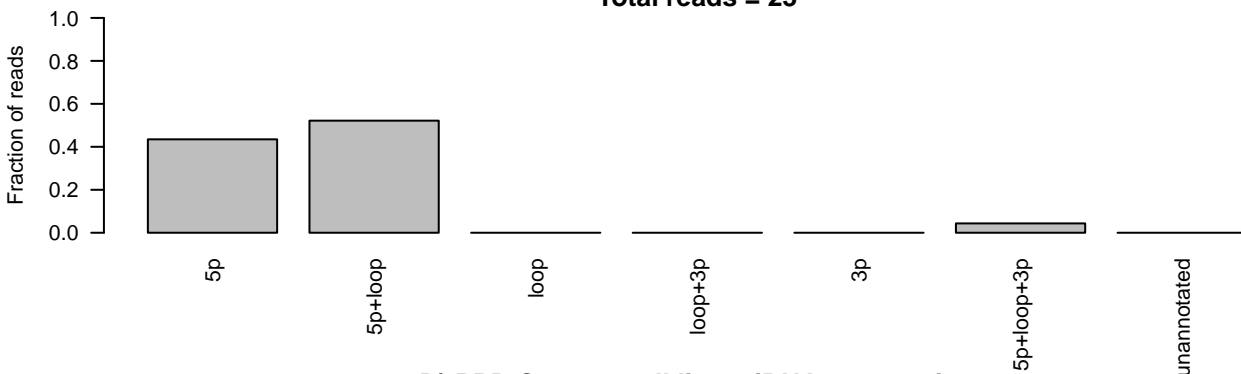

**D) PPB Case 14 cell line miRNA sequencing**  
ID=MI0000782\_1;accession\_number=MI0000782;Name=hsa-mir-374a  
Total reads = 9

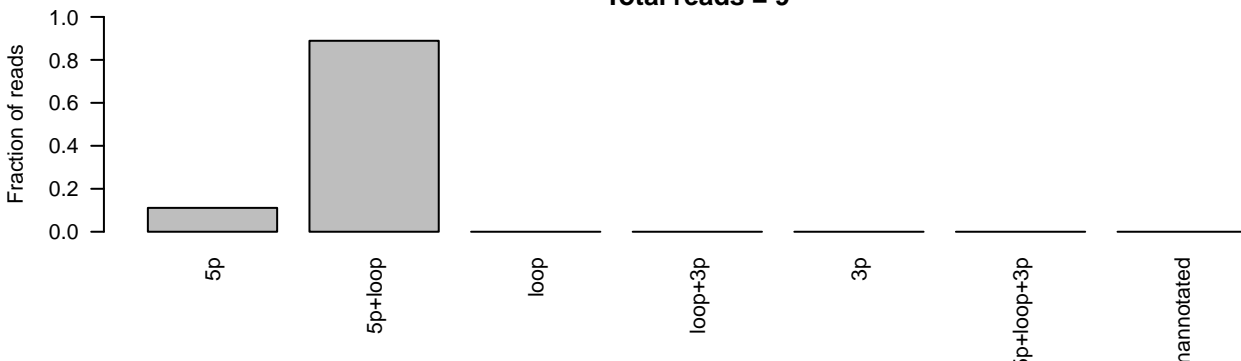

**B) Normal fibroblast miRNA sequencing**  
ID=MI0001446\_1;accession\_number=MI0001446;Name=hsa-mir-424  
Total reads = 7

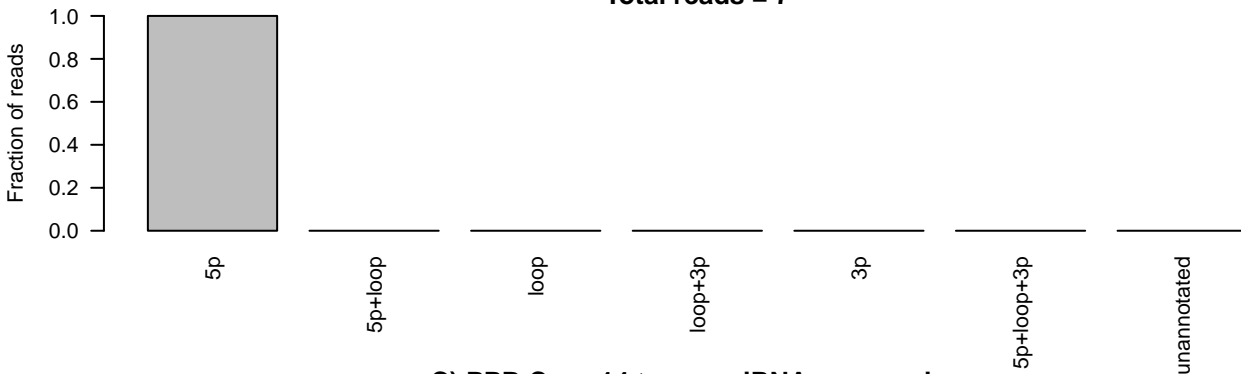

**C) PPB Case 14 tumor miRNA sequencing**  
ID=MI0001446\_1;accession\_number=MI0001446;Name=hsa-mir-424  
Total reads = 0

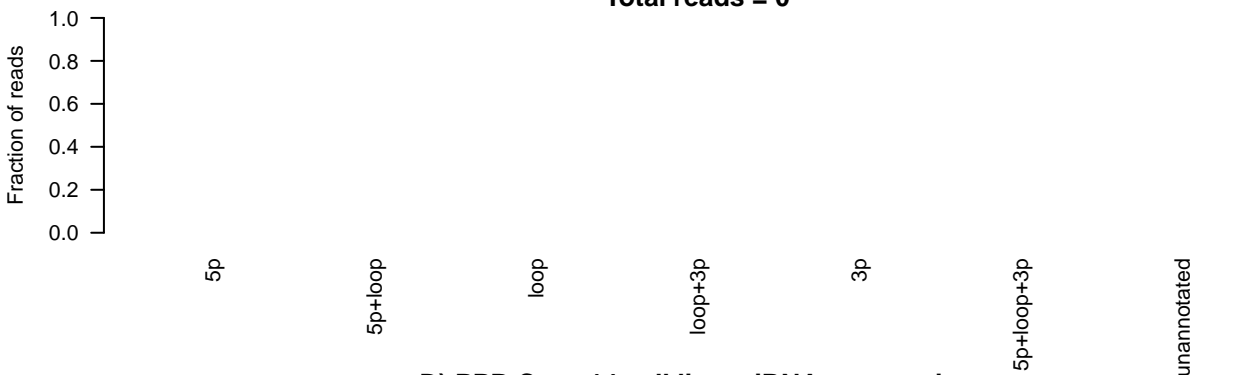

**D) PPB Case 14 cell line miRNA sequencing**  
ID=MI0001446\_1;accession\_number=MI0001446;Name=hsa-mir-424  
Total reads = 1

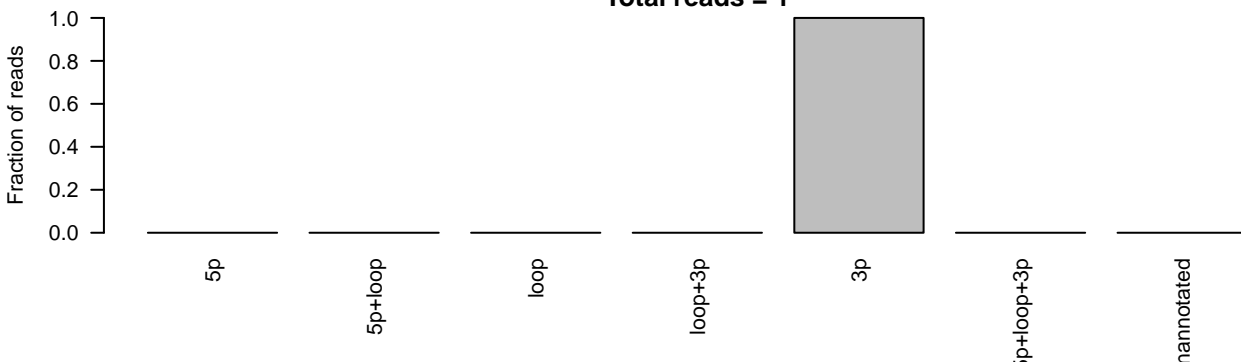

**B) Normal fibroblast miRNA sequencing**  
ID=MI0000071\_1;accession\_number=MI0000071;Name=hsa-mir-17  
Total reads = 6

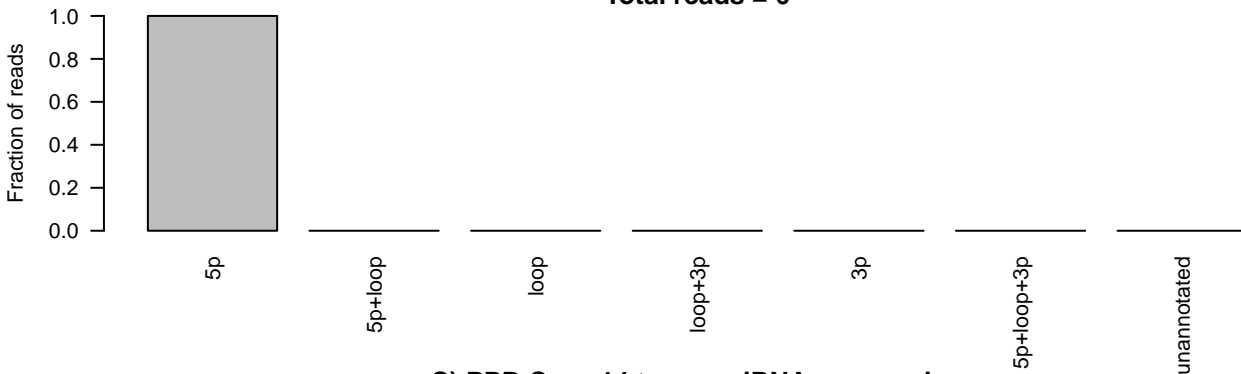

**C) PPB Case 14 tumor miRNA sequencing**  
ID=MI0000071\_1;accession\_number=MI0000071;Name=hsa-mir-17  
Total reads = 147

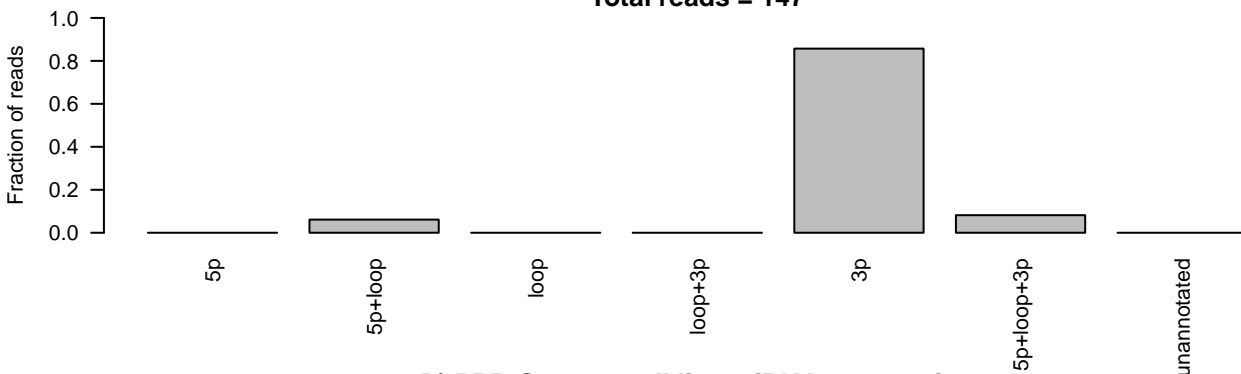

**D) PPB Case 14 cell line miRNA sequencing**  
ID=MI0000071\_1;accession\_number=MI0000071;Name=hsa-mir-17  
Total reads = 4

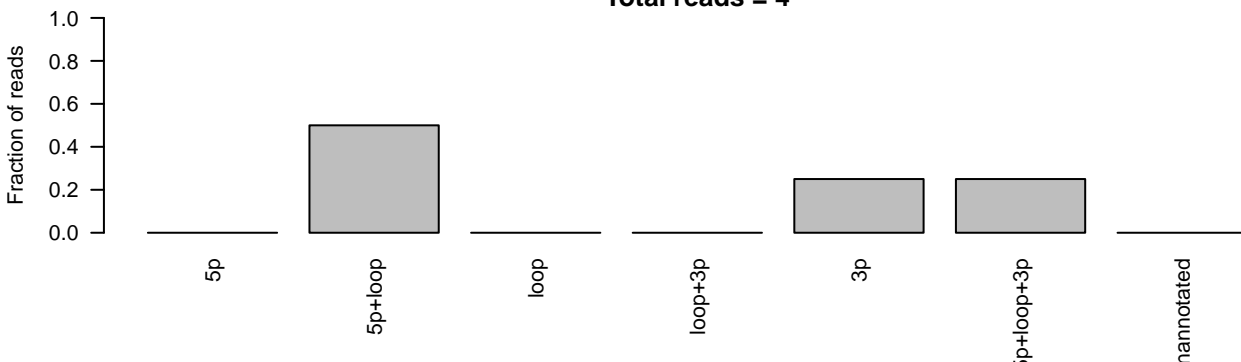



**B) Normal fibroblast miRNA sequencing**  
ID=MI0003133\_1;accession\_number=MI0003133;Name=hsa-mir-432  
Total reads = 7

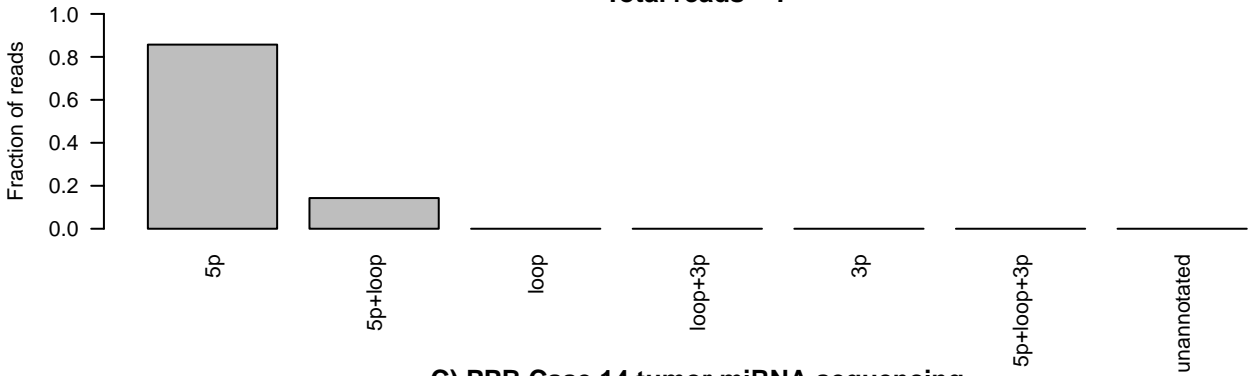

**C) PPB Case 14 tumor miRNA sequencing**  
ID=MI0003133\_1;accession\_number=MI0003133;Name=hsa-mir-432  
Total reads = 23

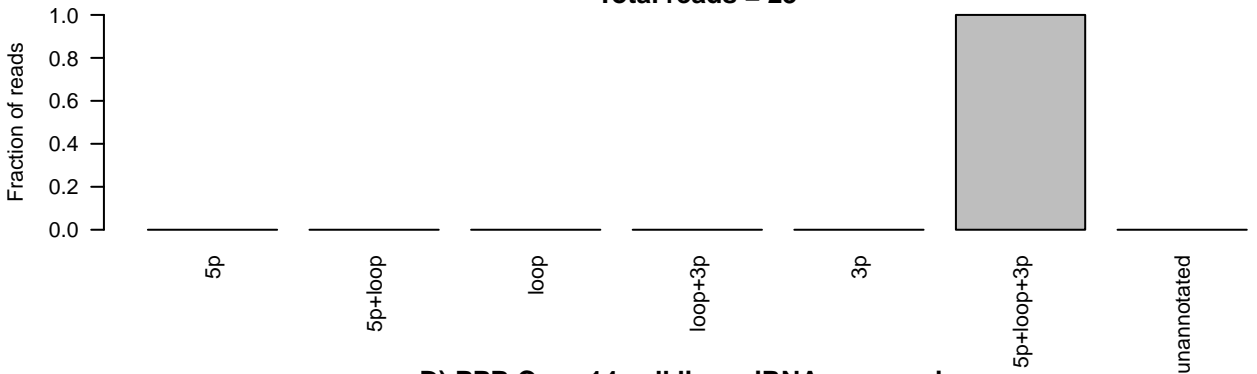

**D) PPB Case 14 cell line miRNA sequencing**  
ID=MI0003133\_1;accession\_number=MI0003133;Name=hsa-mir-432  
Total reads = 3

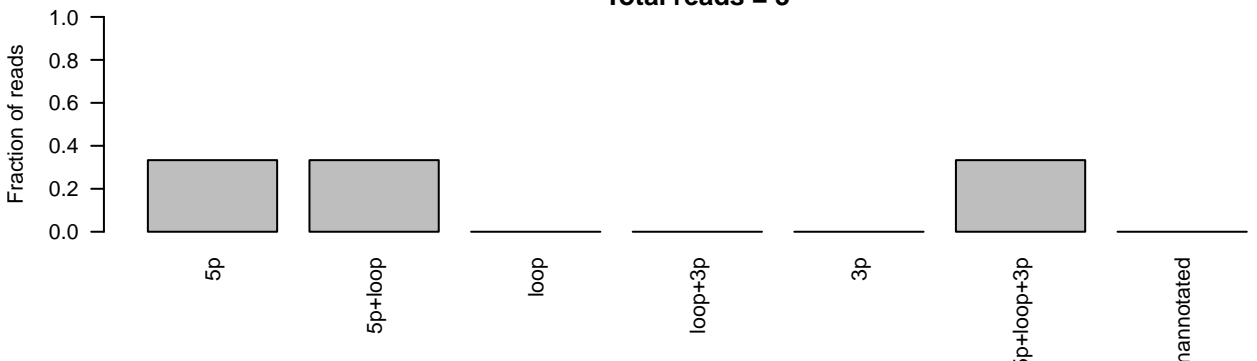

**B) Normal fibroblast miRNA sequencing**  
ID=MI0003602\_1;accession\_number=MI0003602;Name=hsa-mir-590  
Total reads = 6

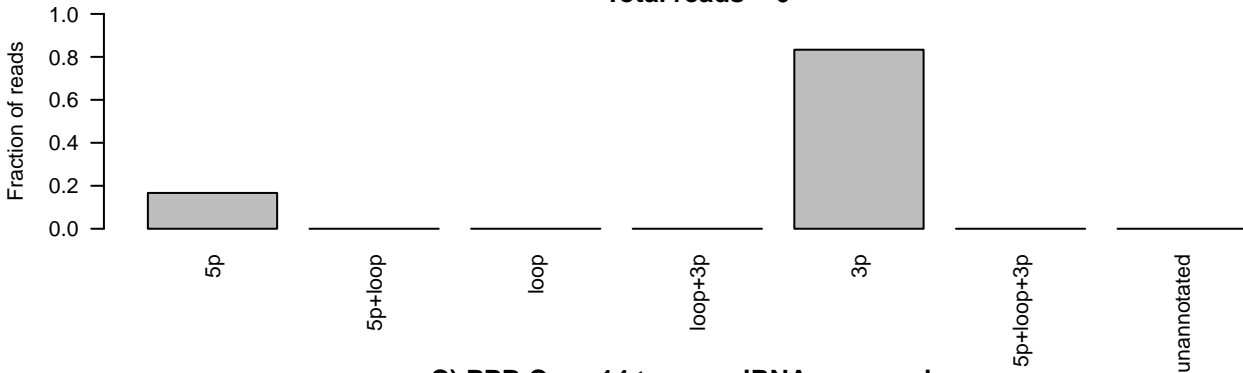

**C) PPB Case 14 tumor miRNA sequencing**  
ID=MI0003602\_1;accession\_number=MI0003602;Name=hsa-mir-590  
Total reads = 12

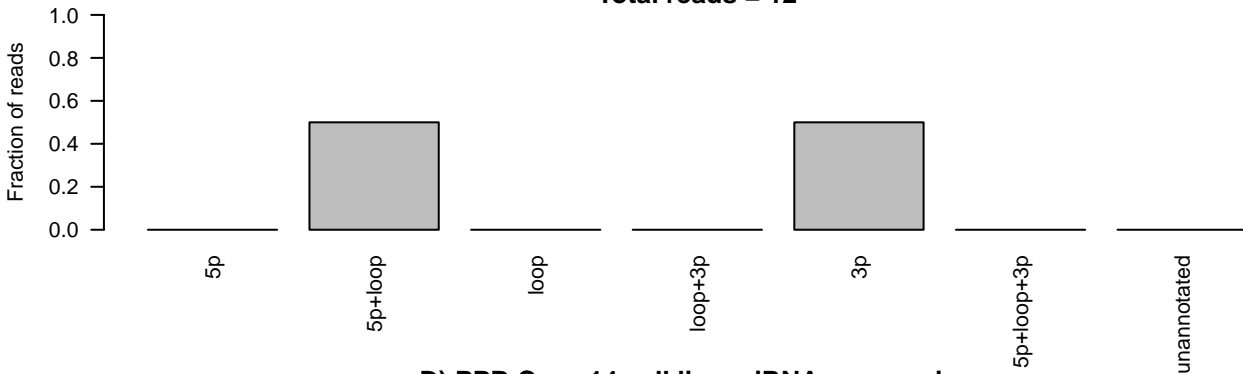

**D) PPB Case 14 cell line miRNA sequencing**  
ID=MI0003602\_1;accession\_number=MI0003602;Name=hsa-mir-590  
Total reads = 4

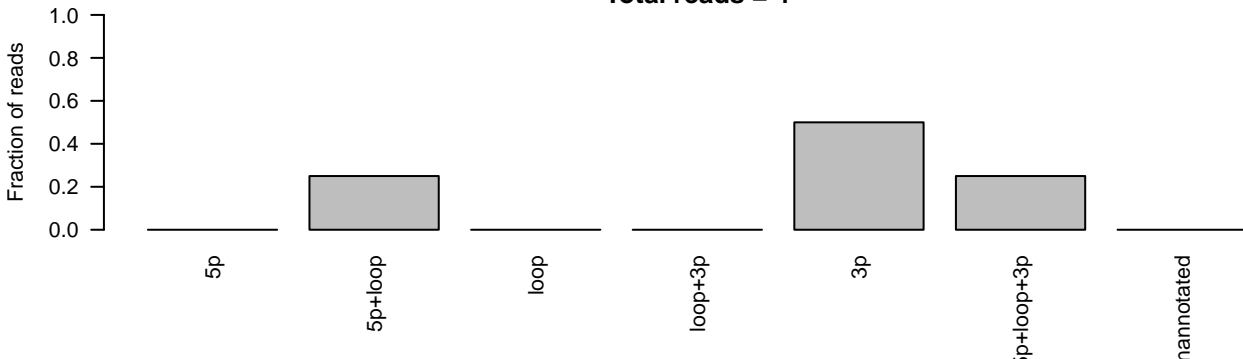

**B) Normal fibroblast miRNA sequencing**  
ID=MI0005543\_1;accession\_number=MI0005543;Name=hsa-mir-708  
Total reads = 5

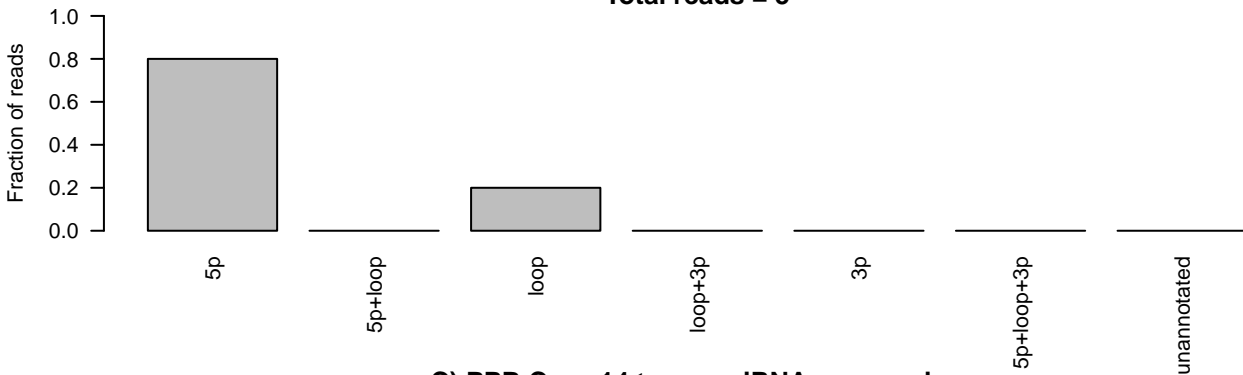

**C) PPB Case 14 tumor miRNA sequencing**  
ID=MI0005543\_1;accession\_number=MI0005543;Name=hsa-mir-708  
Total reads = 0



**D) PPB Case 14 cell line miRNA sequencing**  
ID=MI0005543\_1;accession\_number=MI0005543;Name=hsa-mir-708  
Total reads = 5



**B) Normal fibroblast miRNA sequencing**  
ID=MI0000076\_1;accession\_number=MI0000076;Name=hsa-mir-20a  
Total reads = 5

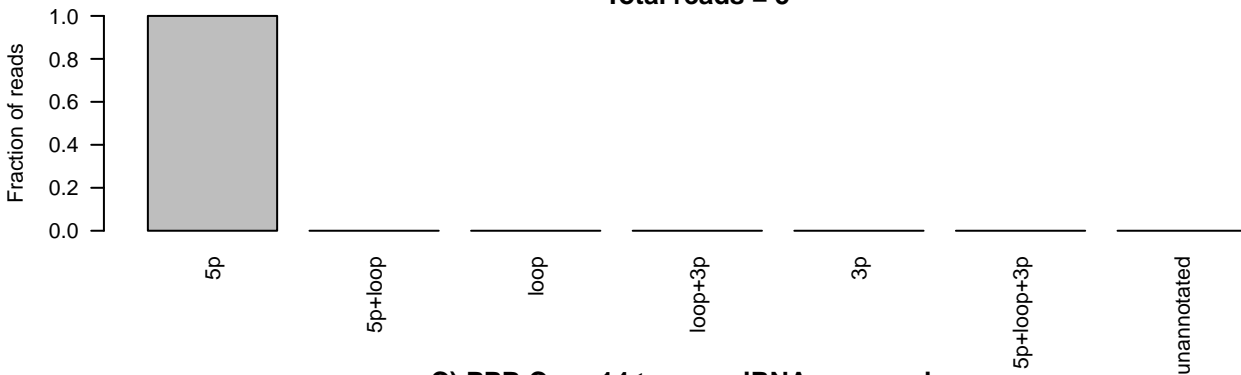

**C) PPB Case 14 tumor miRNA sequencing**  
ID=MI0000076\_1;accession\_number=MI0000076;Name=hsa-mir-20a  
Total reads = 21

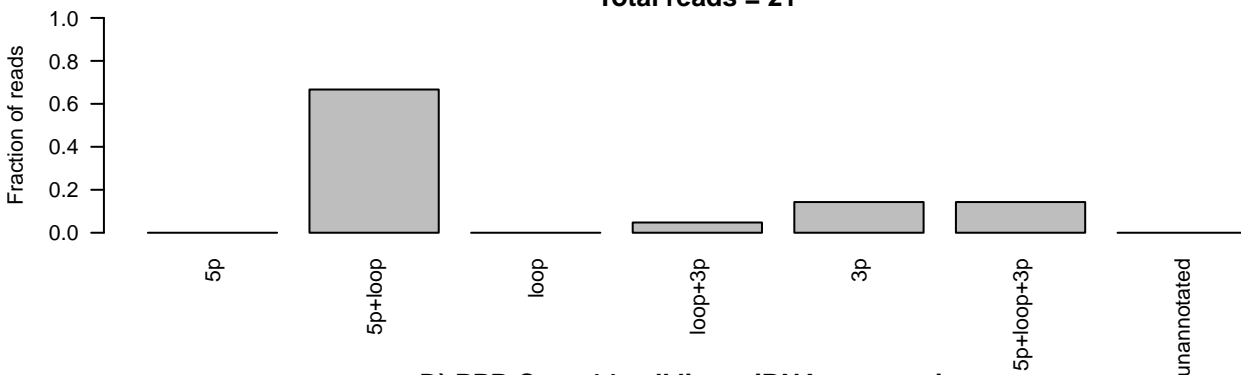

**D) PPB Case 14 cell line miRNA sequencing**  
ID=MI0000076\_1;accession\_number=MI0000076;Name=hsa-mir-20a  
Total reads = 5

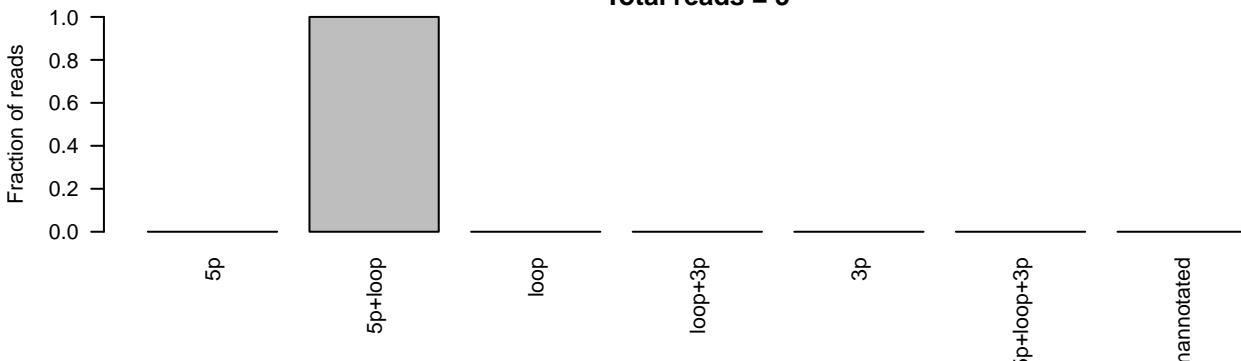

**B) Normal fibroblast miRNA sequencing**  
ID=MI0001723\_1;accession\_number=MI0001723;Name=hsa-mir-433  
Total reads = 1

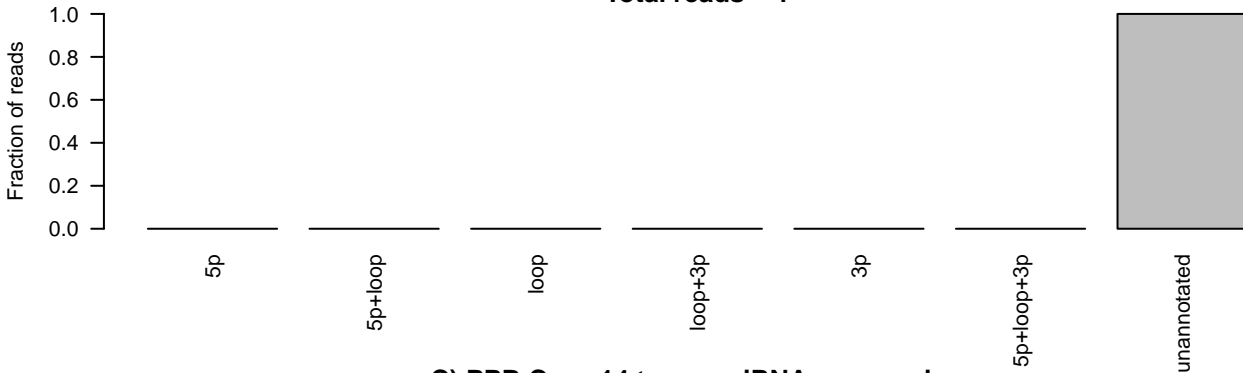

**C) PPB Case 14 tumor miRNA sequencing**  
ID=MI0001723\_1;accession\_number=MI0001723;Name=hsa-mir-433  
Total reads = 31

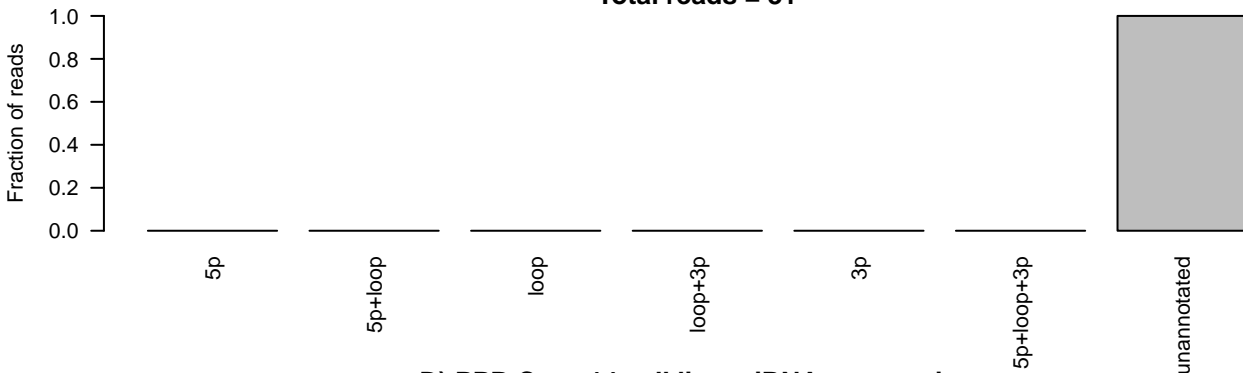

**D) PPB Case 14 cell line miRNA sequencing**  
ID=MI0001723\_1;accession\_number=MI0001723;Name=hsa-mir-433  
Total reads = 4

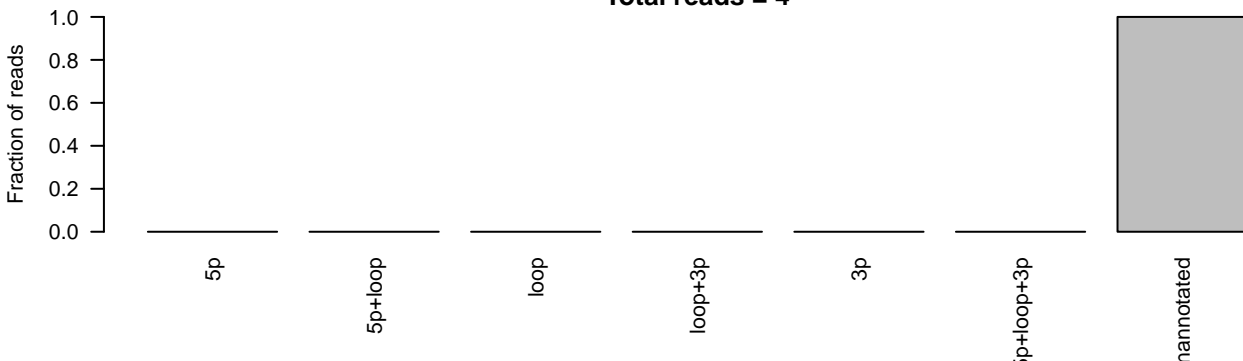

**B) Normal fibroblast miRNA sequencing**  
ID=MI0000264\_1;accession\_number=MI0000264;Name=hsa-mir-7-2  
Total reads = 5

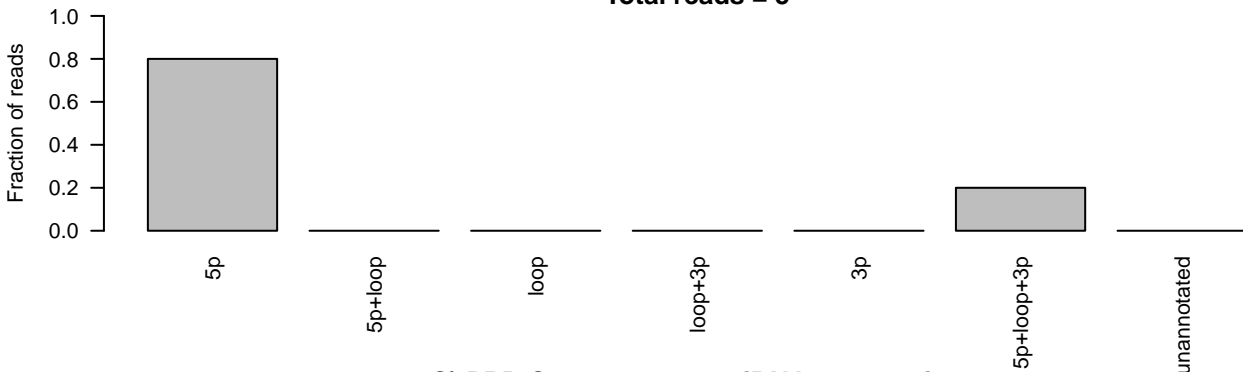

**C) PPB Case 14 tumor miRNA sequencing**  
ID=MI0000264\_1;accession\_number=MI0000264;Name=hsa-mir-7-2  
Total reads = 0

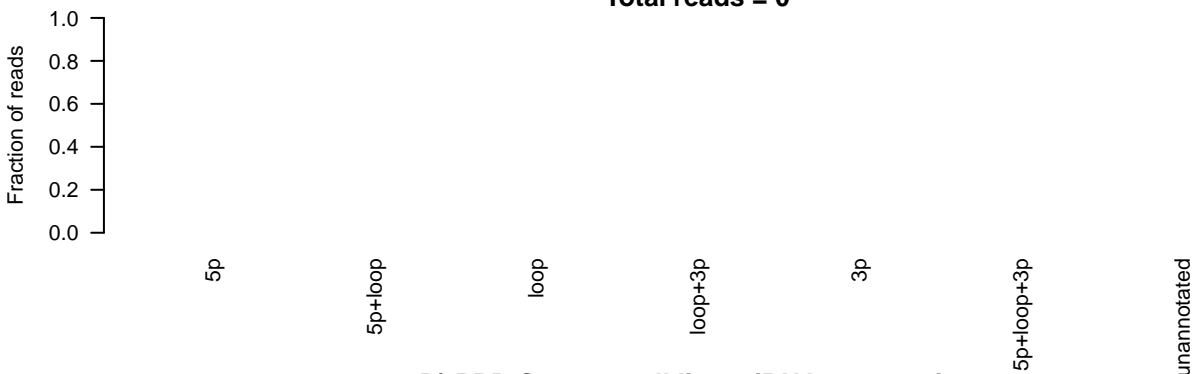

**D) PPB Case 14 cell line miRNA sequencing**  
ID=MI0000264\_1;accession\_number=MI0000264;Name=hsa-mir-7-2  
Total reads = 2

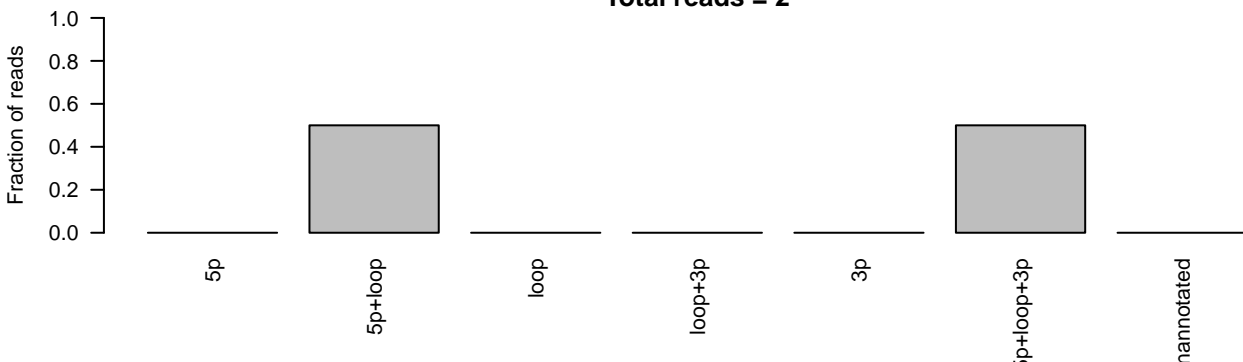

**B) Normal fibroblast miRNA sequencing**  
ID=MI0017351\_1;accession\_number=MI0017351;Name=hsa-mir-3529  
Total reads = 5

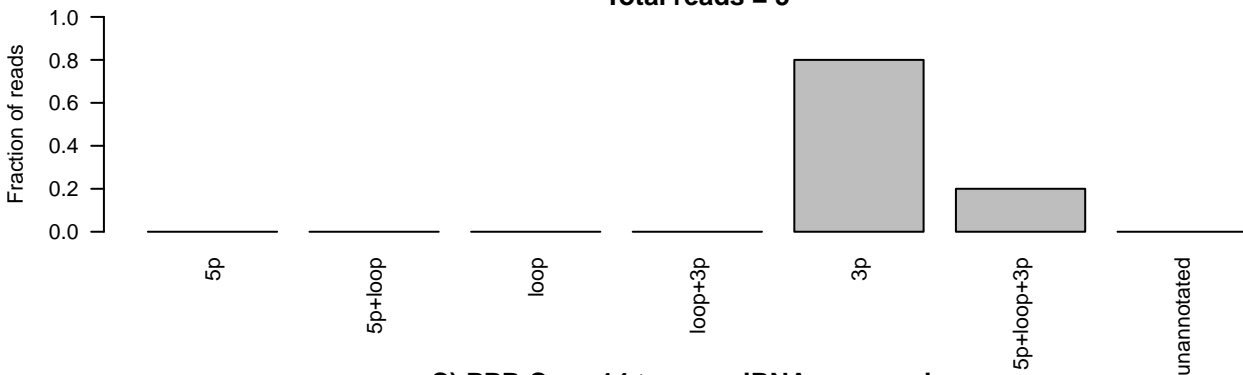

**C) PPB Case 14 tumor miRNA sequencing**  
ID=MI0017351\_1;accession\_number=MI0017351;Name=hsa-mir-3529  
Total reads = 0



**D) PPB Case 14 cell line miRNA sequencing**  
ID=MI0017351\_1;accession\_number=MI0017351;Name=hsa-mir-3529  
Total reads = 2

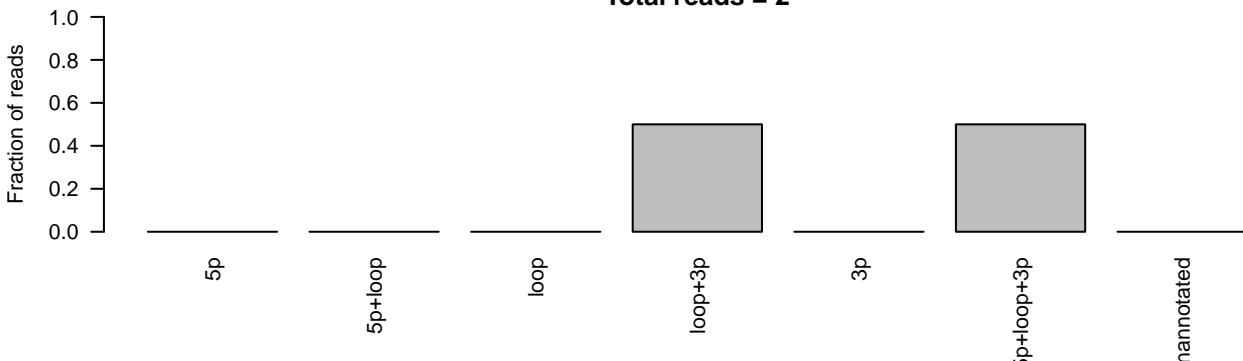

**B) Normal fibroblast miRNA sequencing**  
ID=MI0000478\_1;accession\_number=MI0000478;Name=hsa-mir-149  
Total reads = 5

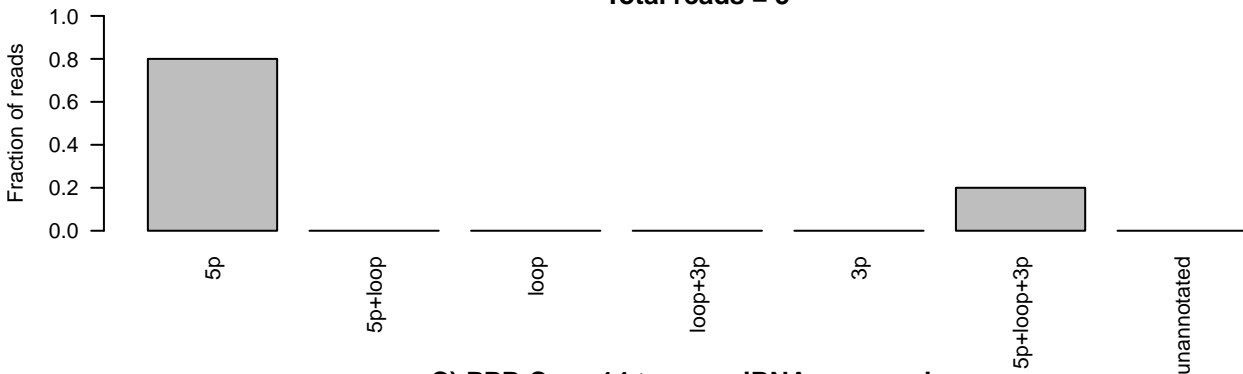

**C) PPB Case 14 tumor miRNA sequencing**  
ID=MI0000478\_1;accession\_number=MI0000478;Name=hsa-mir-149  
Total reads = 6

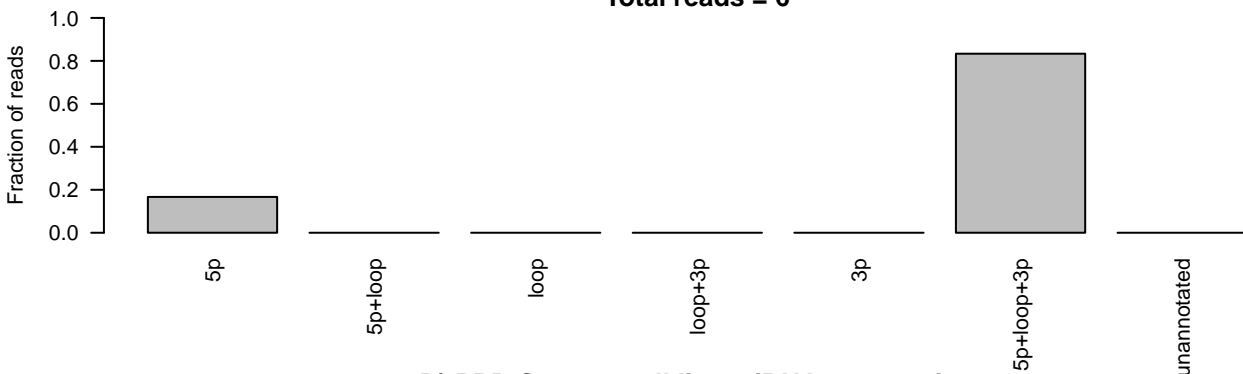

**D) PPB Case 14 cell line miRNA sequencing**  
ID=MI0000478\_1;accession\_number=MI0000478;Name=hsa-mir-149  
Total reads = 1

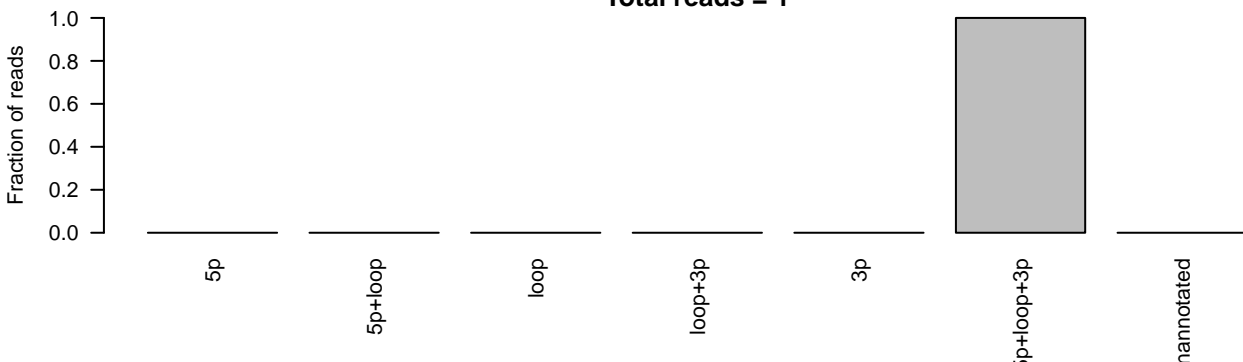



**B) Normal fibroblast miRNA sequencing**  
ID=MI0016048\_1;accession\_number=MI0016048;Name=hsa-mir-3648  
Total reads = 0

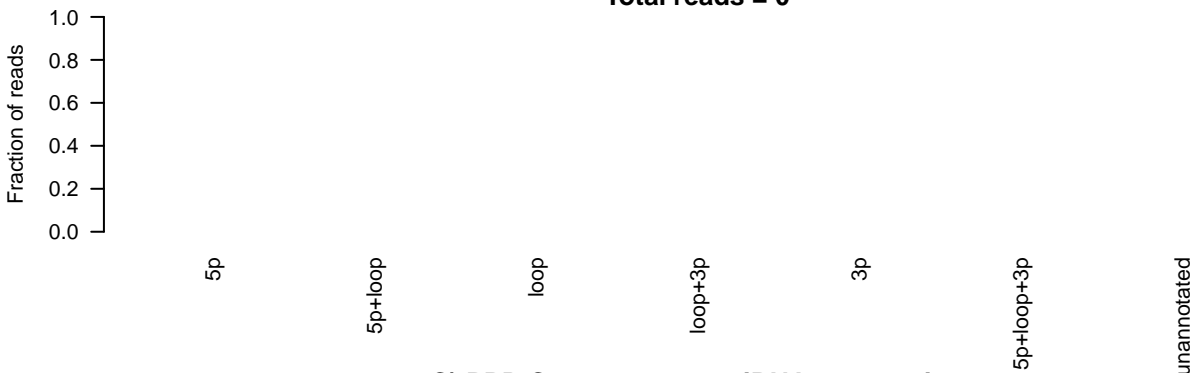

**C) PPB Case 14 tumor miRNA sequencing**  
ID=MI0016048\_1;accession\_number=MI0016048;Name=hsa-mir-3648  
Total reads = 0

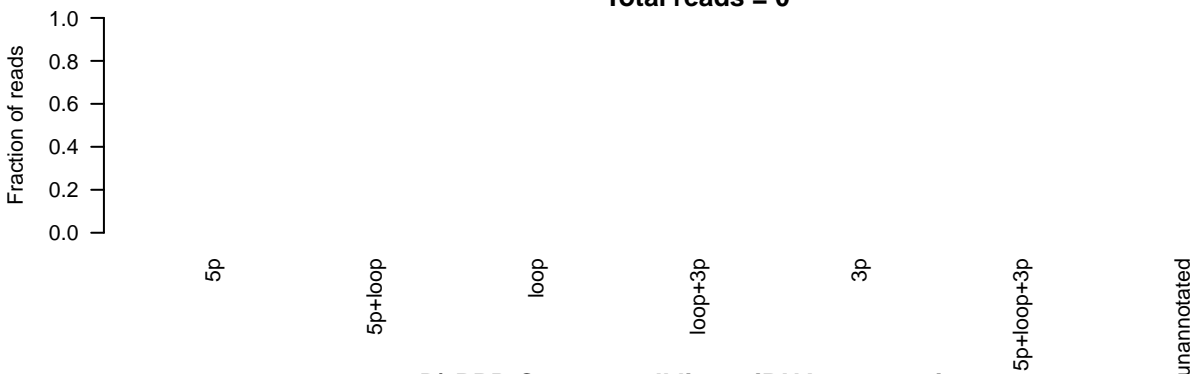

**D) PPB Case 14 cell line miRNA sequencing**  
ID=MI0016048\_1;accession\_number=MI0016048;Name=hsa-mir-3648  
Total reads = 0

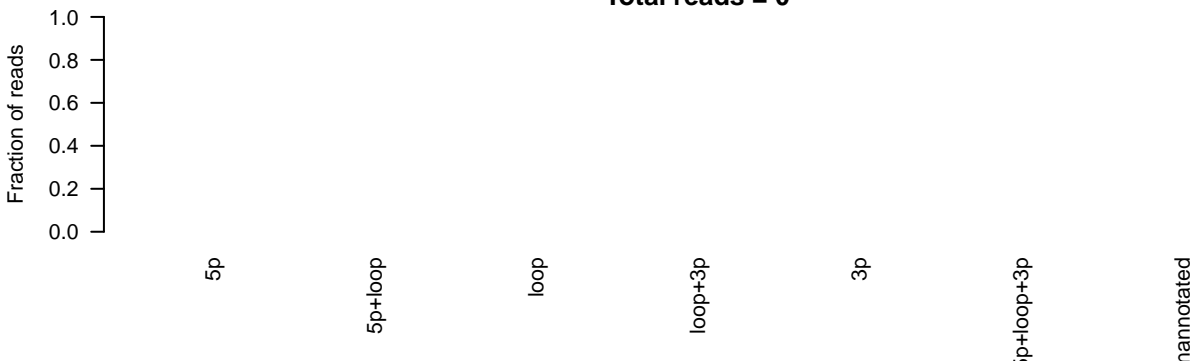

**B) Normal fibroblast miRNA sequencing**  
ID=MI0000101\_1;accession\_number=MI0000101;Name=hsa-mir-99a  
Total reads = 3

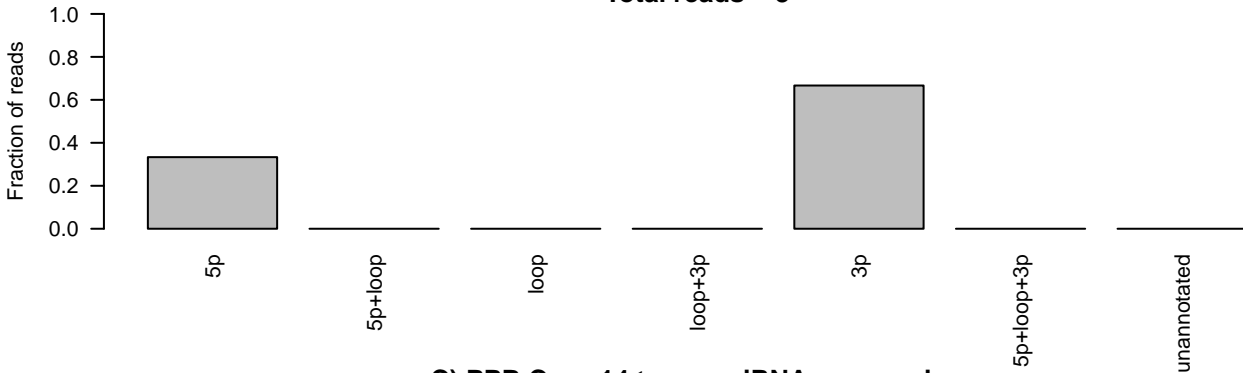

**C) PPB Case 14 tumor miRNA sequencing**  
ID=MI0000101\_1;accession\_number=MI0000101;Name=hsa-mir-99a  
Total reads = 274

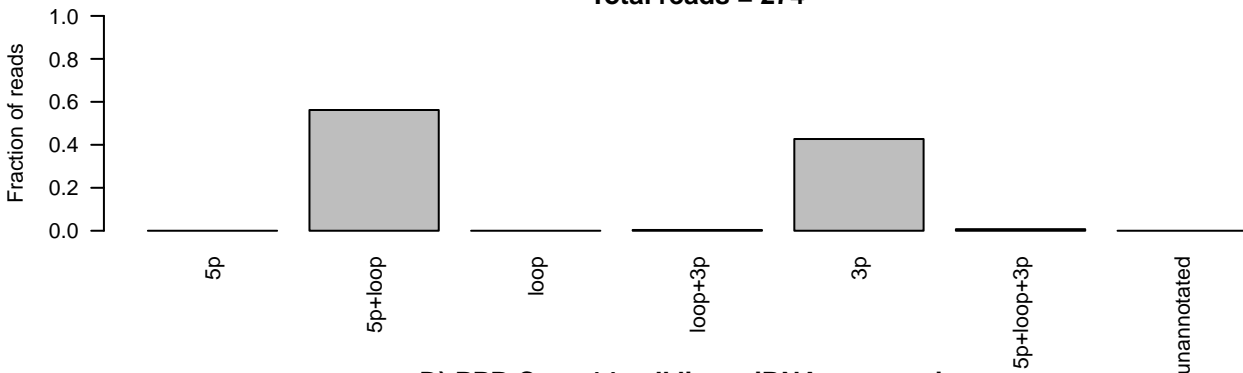

**D) PPB Case 14 cell line miRNA sequencing**  
ID=MI0000101\_1;accession\_number=MI0000101;Name=hsa-mir-99a  
Total reads = 20

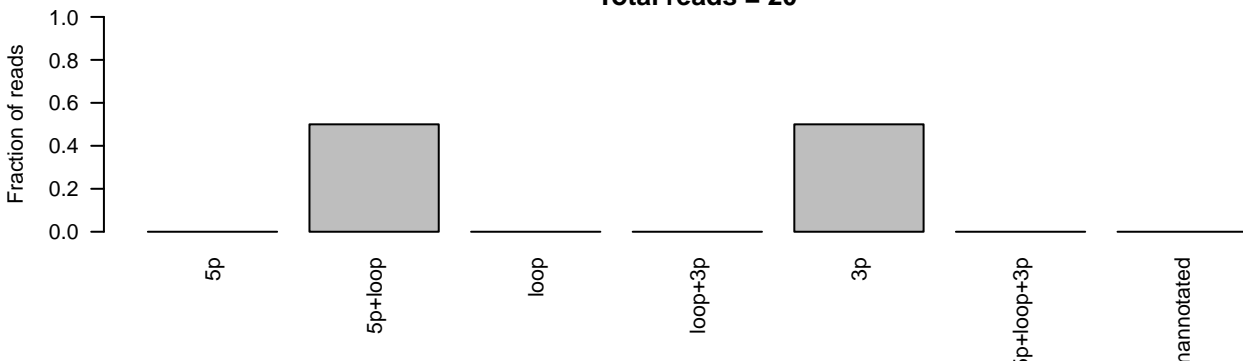

**B) Normal fibroblast miRNA sequencing**  
ID=MI0000255\_1;accession\_number=MI0000255;Name=hsa-mir-30d  
Total reads = 5

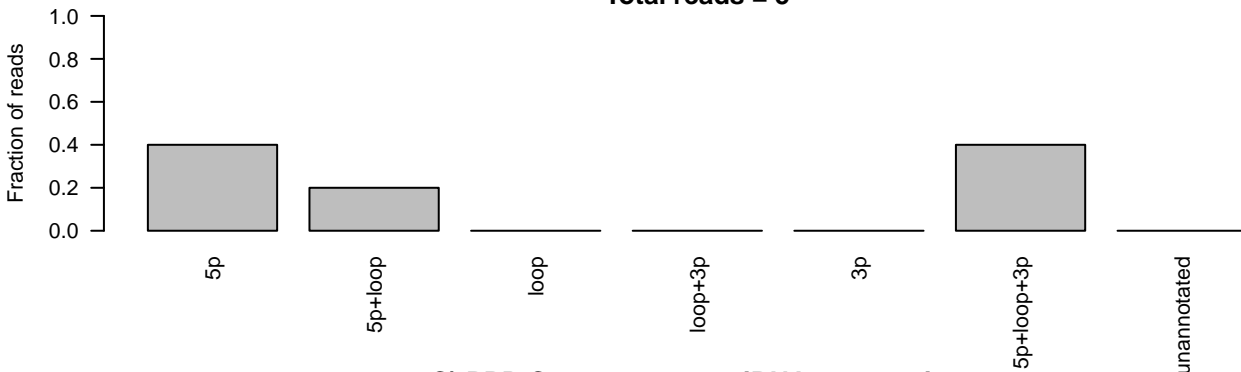

**C) PPB Case 14 tumor miRNA sequencing**  
ID=MI0000255\_1;accession\_number=MI0000255;Name=hsa-mir-30d  
Total reads = 193

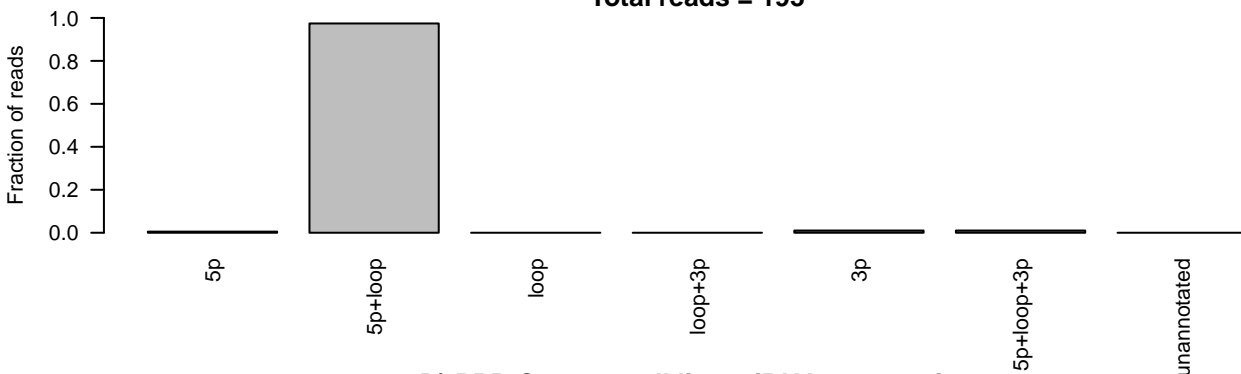

**D) PPB Case 14 cell line miRNA sequencing**  
ID=MI0000255\_1;accession\_number=MI0000255;Name=hsa-mir-30d  
Total reads = 14

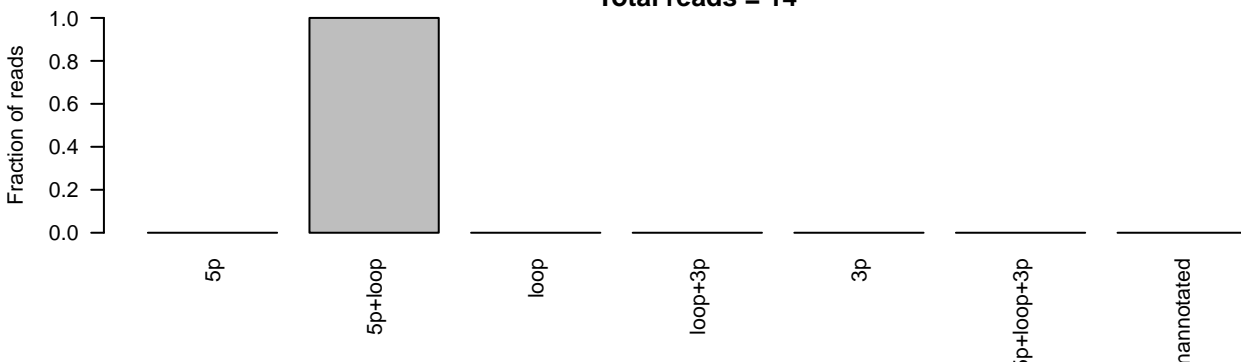

**B) Normal fibroblast miRNA sequencing**  
ID=MI0020364\_1;accession\_number=MI0020364;Name=hsa-mir-6087  
Total reads = 0



**C) PPB Case 14 tumor miRNA sequencing**  
ID=MI0020364\_1;accession\_number=MI0020364;Name=hsa-mir-6087  
Total reads = 0



**D) PPB Case 14 cell line miRNA sequencing**  
ID=MI0020364\_1;accession\_number=MI0020364;Name=hsa-mir-6087  
Total reads = 0



**B) Normal fibroblast miRNA sequencing**  
ID=MI0000806\_1;accession\_number=MI0000806;Name=hsa-mir-337  
Total reads = 4

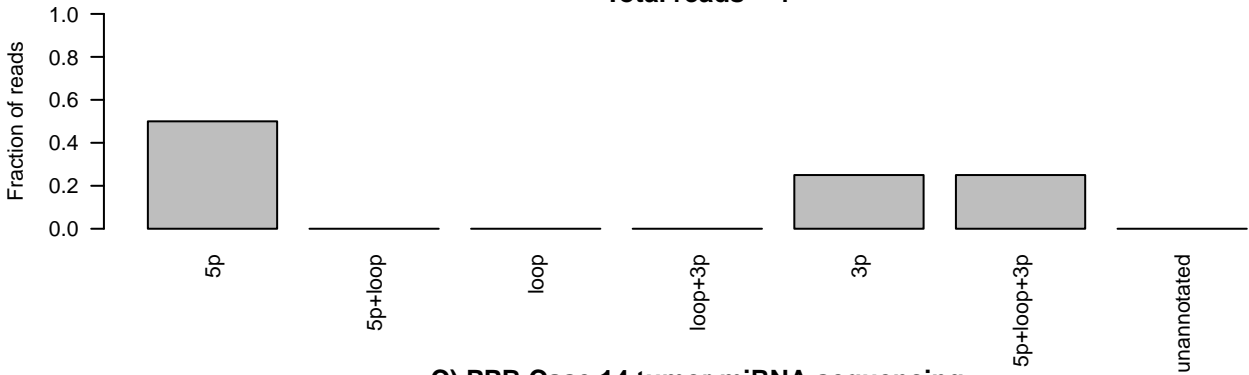

**C) PPB Case 14 tumor miRNA sequencing**  
ID=MI0000806\_1;accession\_number=MI0000806;Name=hsa-mir-337  
Total reads = 45

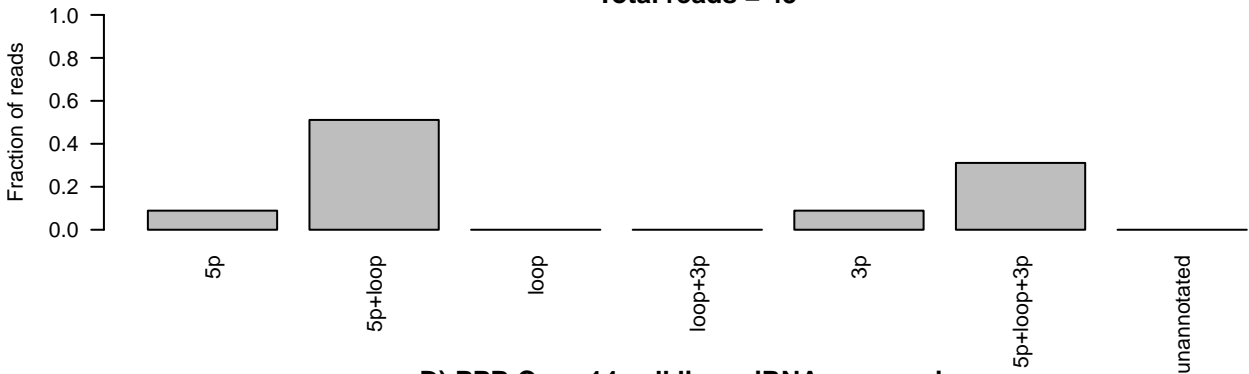

**D) PPB Case 14 cell line miRNA sequencing**  
ID=MI0000806\_1;accession\_number=MI0000806;Name=hsa-mir-337  
Total reads = 1

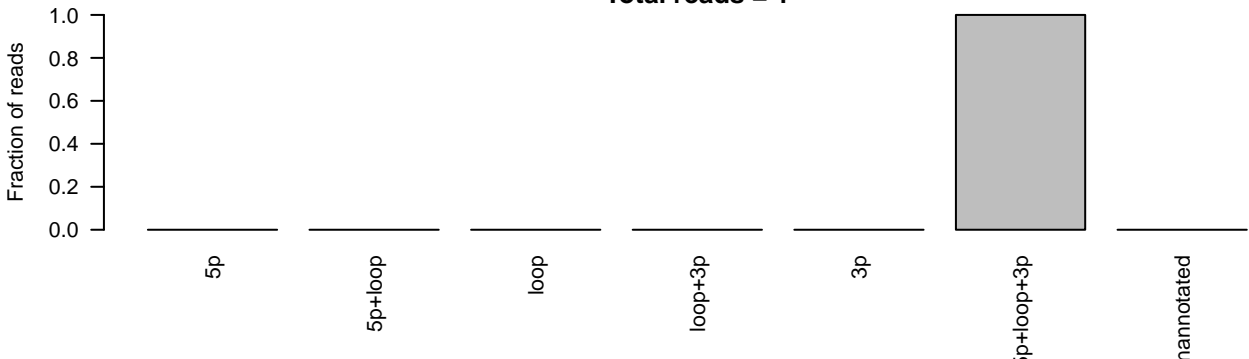

**B) Normal fibroblast miRNA sequencing**  
ID=MI0005563\_1;accession\_number=MI0005563;Name=hsa-mir-665  
Total reads = 1

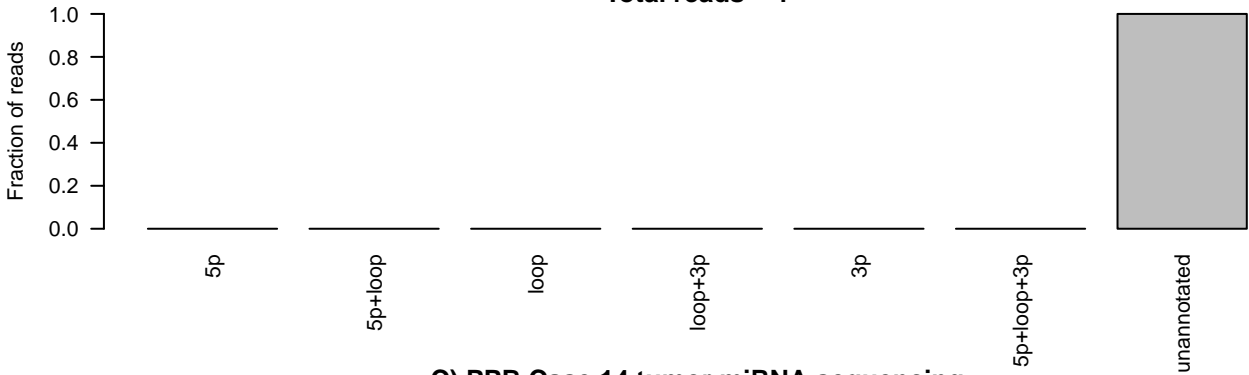

**C) PPB Case 14 tumor miRNA sequencing**  
ID=MI0005563\_1;accession\_number=MI0005563;Name=hsa-mir-665  
Total reads = 4

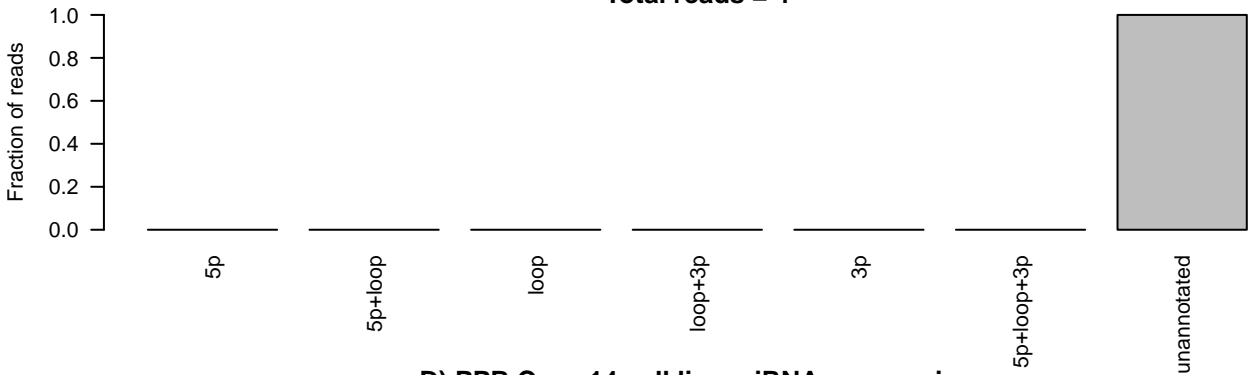

**D) PPB Case 14 cell line miRNA sequencing**  
ID=MI0005563\_1;accession\_number=MI0005563;Name=hsa-mir-665  
Total reads = 0



**B) Normal fibroblast miRNA sequencing**  
ID=MI0000744\_1;accession\_number=MI0000744;Name=hsa-mir-299  
Total reads = 5

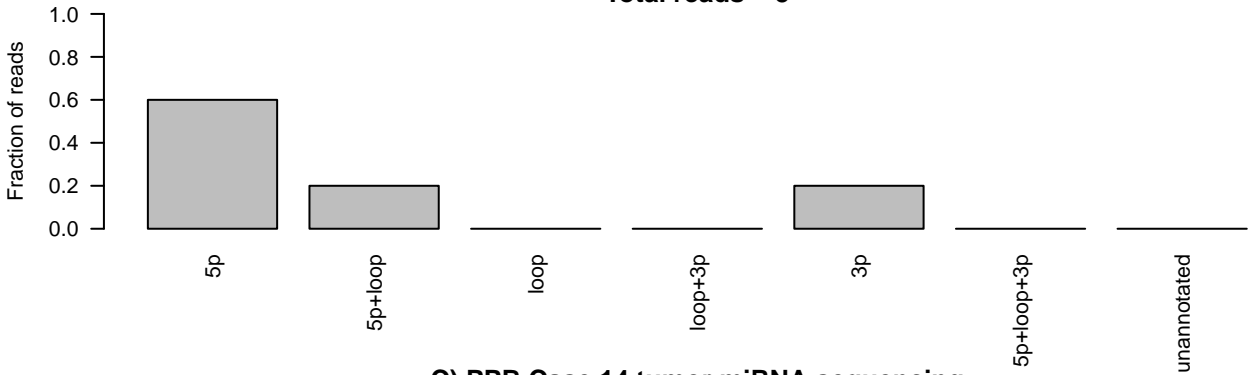

**C) PPB Case 14 tumor miRNA sequencing**  
ID=MI0000744\_1;accession\_number=MI0000744;Name=hsa-mir-299  
Total reads = 120

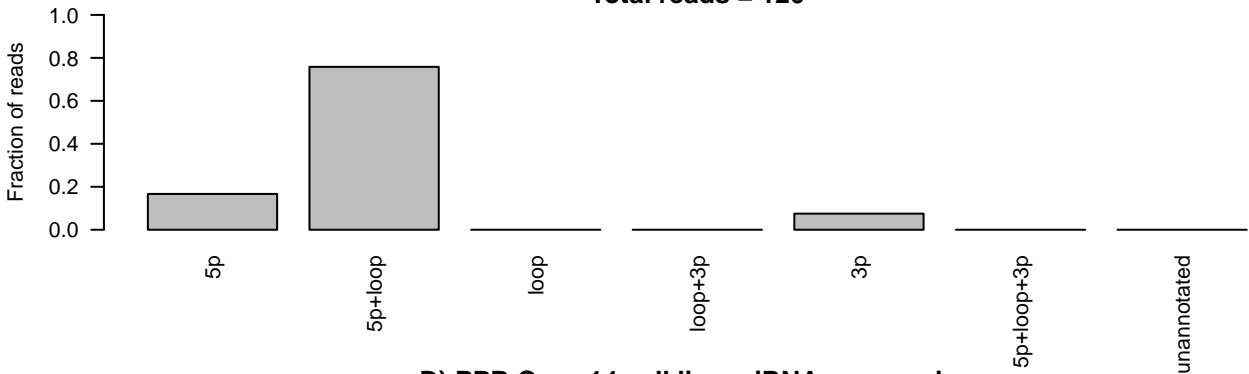

**D) PPB Case 14 cell line miRNA sequencing**  
ID=MI0000744\_1;accession\_number=MI0000744;Name=hsa-mir-299  
Total reads = 2

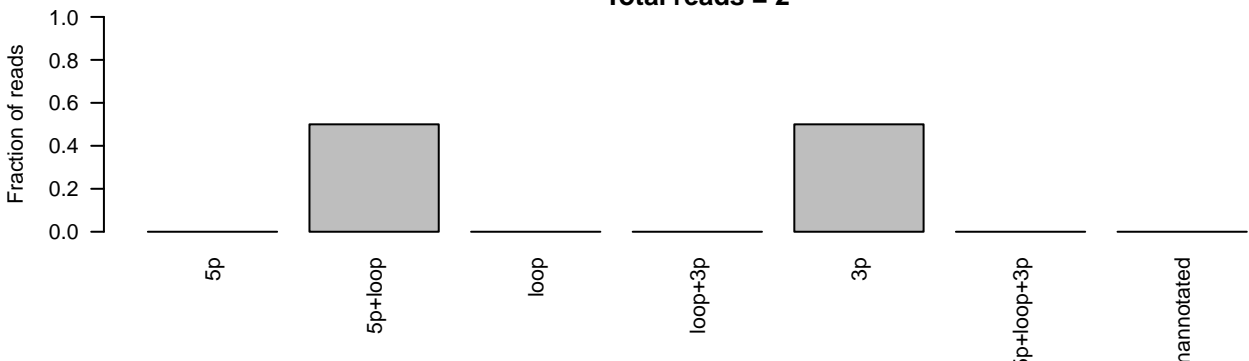

**B) Normal fibroblast miRNA sequencing**  
ID=MI0003643\_1;accession\_number=MI0003643;Name=hsa-mir-629  
Total reads = 4

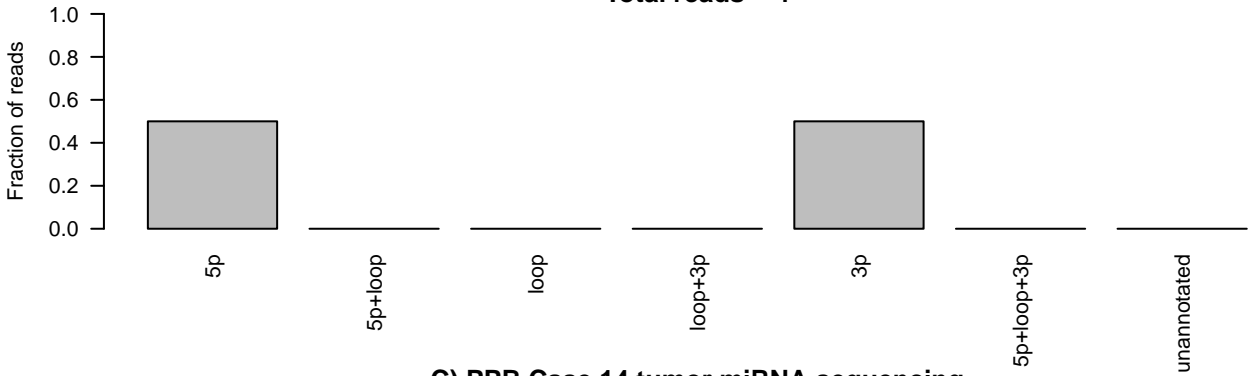

**C) PPB Case 14 tumor miRNA sequencing**  
ID=MI0003643\_1;accession\_number=MI0003643;Name=hsa-mir-629  
Total reads = 0

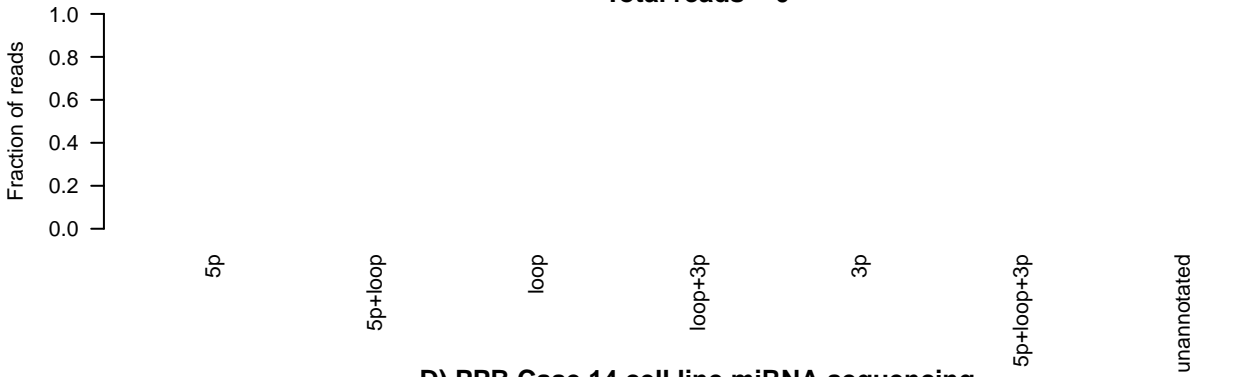

**D) PPB Case 14 cell line miRNA sequencing**  
ID=MI0003643\_1;accession\_number=MI0003643;Name=hsa-mir-629  
Total reads = 0

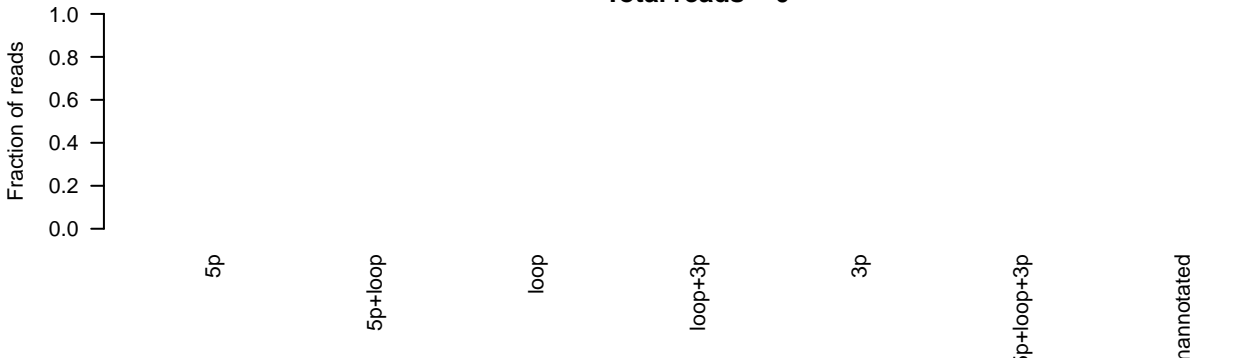



**B) Normal fibroblast miRNA sequencing**  
ID=MI0003646\_1;accession\_number=MI0003646;Name=hsa-mir-33b  
Total reads = 4

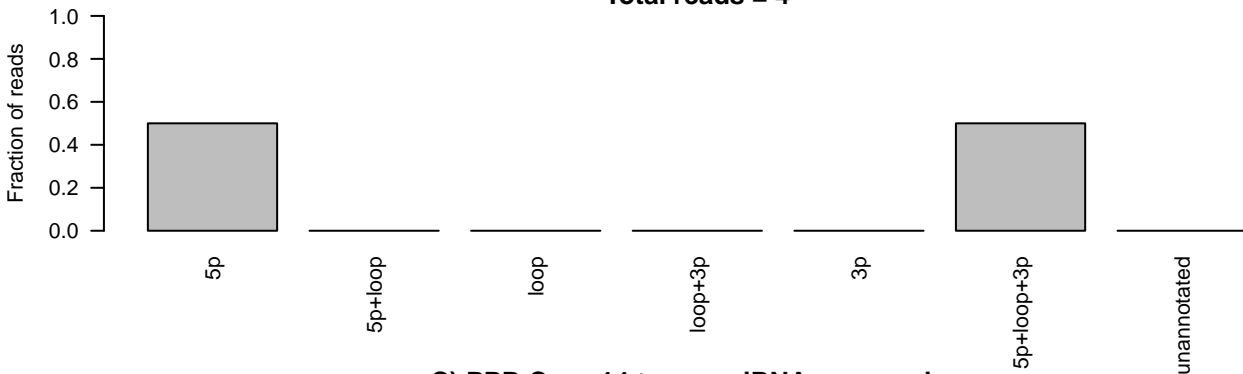

**C) PPB Case 14 tumor miRNA sequencing**  
ID=MI0003646\_1;accession\_number=MI0003646;Name=hsa-mir-33b  
Total reads = 1

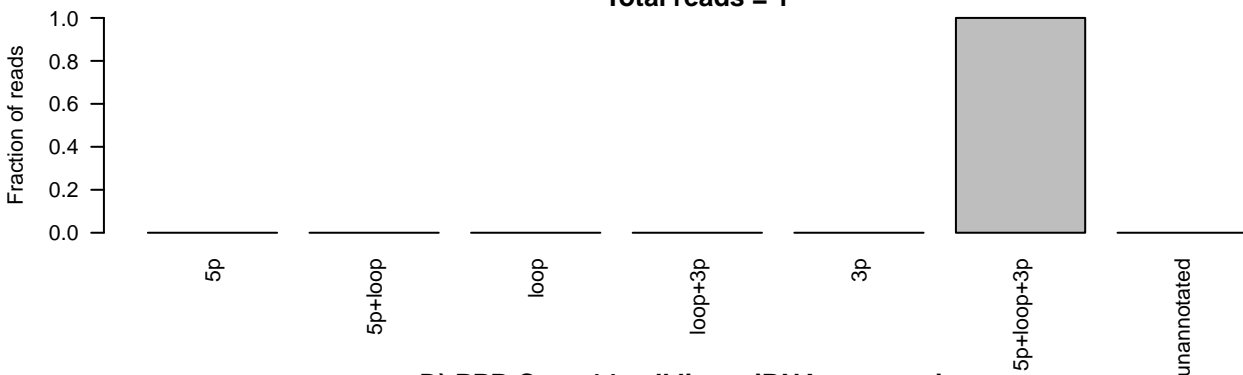

**D) PPB Case 14 cell line miRNA sequencing**  
ID=MI0003646\_1;accession\_number=MI0003646;Name=hsa-mir-33b  
Total reads = 0



### B) Normal fibroblast miRNA sequencing

ID=MI0008191\_1;accession\_number=MI0008191;Name=hsa-mir-320c-2

Total reads = 4

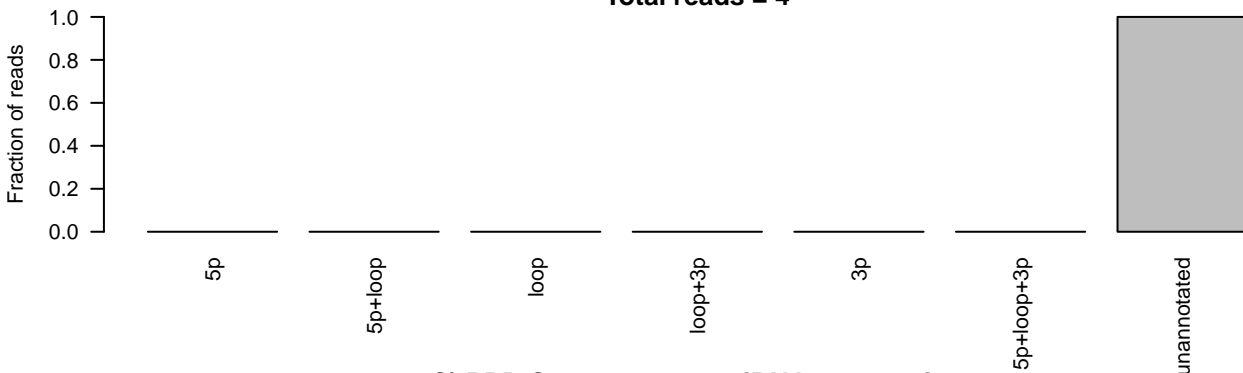

### C) PPB Case 14 tumor miRNA sequencing

ID=MI0008191\_1;accession\_number=MI0008191;Name=hsa-mir-320c-2

Total reads = 3

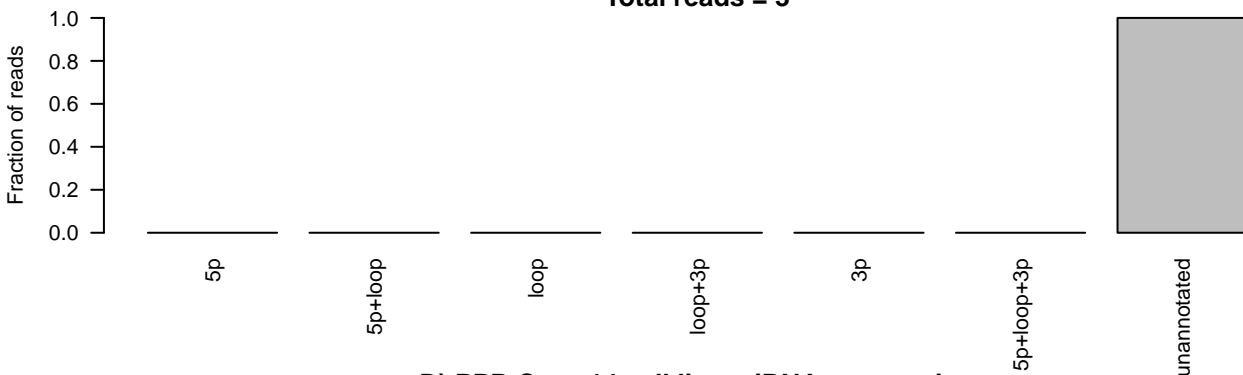

### D) PPB Case 14 cell line miRNA sequencing

ID=MI0008191\_1;accession\_number=MI0008191;Name=hsa-mir-320c-2

Total reads = 3

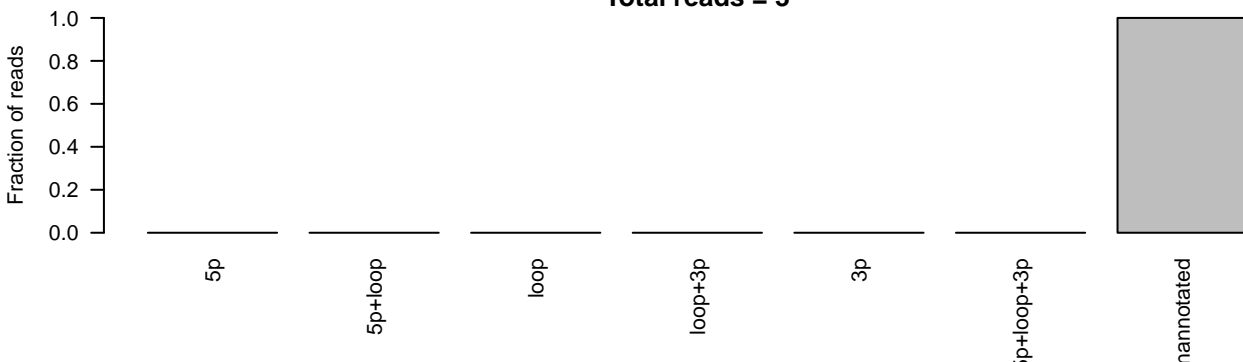

**B) Normal fibroblast miRNA sequencing**  
ID=MI0003656\_1;accession\_number=MI0003656;Name=hsa-mir-641  
Total reads = 4

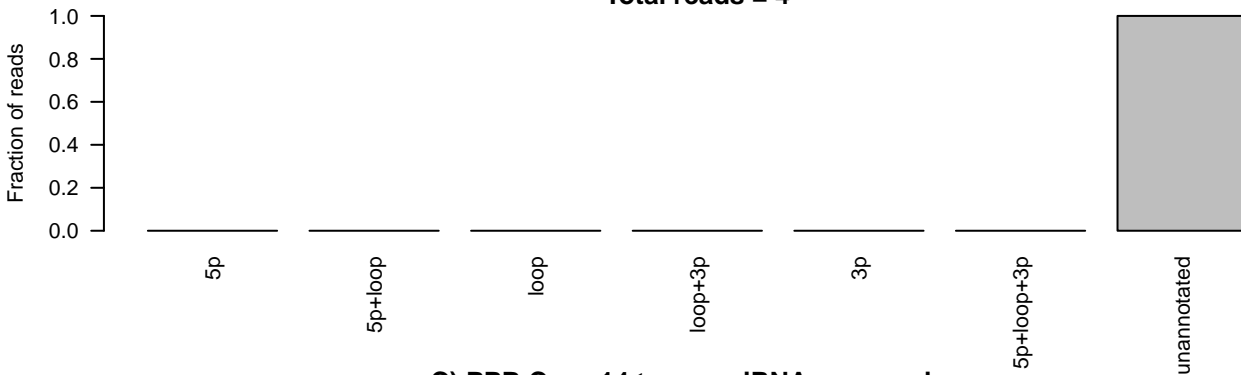

**C) PPB Case 14 tumor miRNA sequencing**  
ID=MI0003656\_1;accession\_number=MI0003656;Name=hsa-mir-641  
Total reads = 0



**D) PPB Case 14 cell line miRNA sequencing**  
ID=MI0003656\_1;accession\_number=MI0003656;Name=hsa-mir-641  
Total reads = 0



**B) Normal fibroblast miRNA sequencing**  
ID=MI0000746\_1;accession\_number=MI0000746;Name=hsa-mir-99b  
Total reads = 3

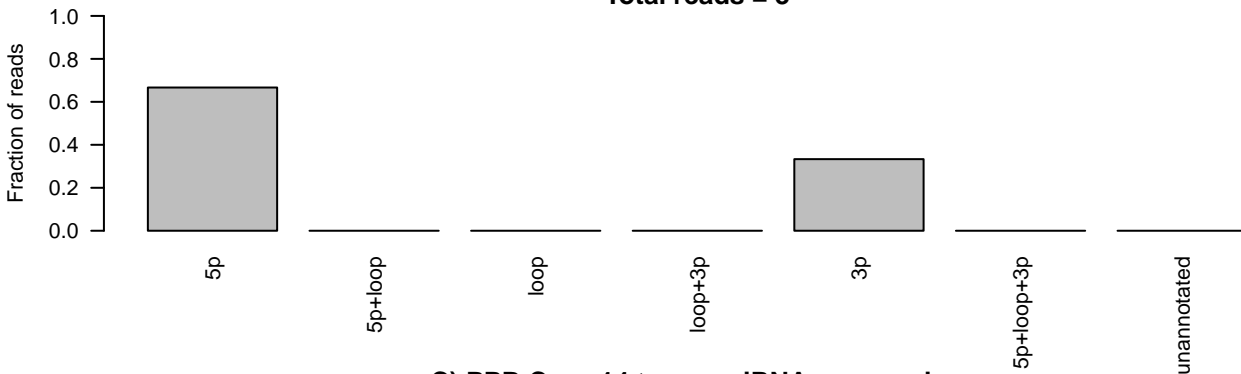

**C) PPB Case 14 tumor miRNA sequencing**  
ID=MI0000746\_1;accession\_number=MI0000746;Name=hsa-mir-99b  
Total reads = 15

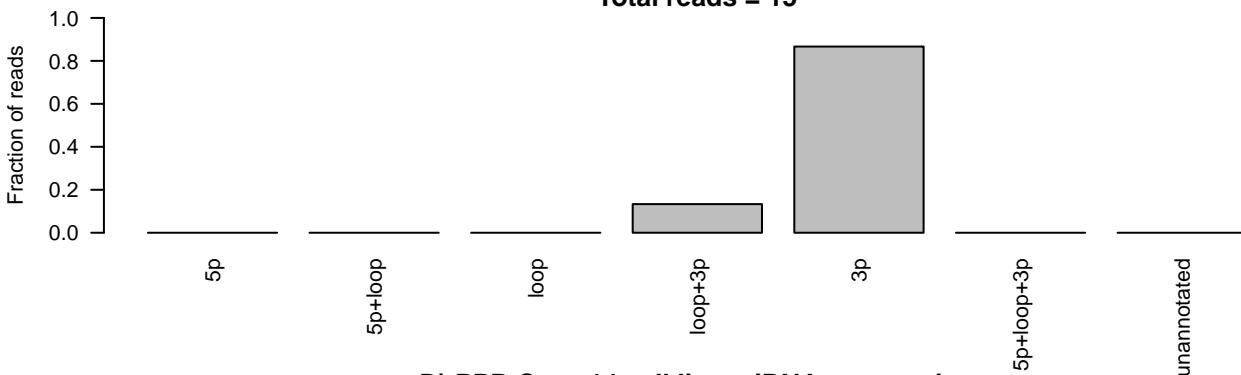

**D) PPB Case 14 cell line miRNA sequencing**  
ID=MI0000746\_1;accession\_number=MI0000746;Name=hsa-mir-99b  
Total reads = 7



**B) Normal fibroblast miRNA sequencing**  
ID=MI0000295\_1;accession\_number=MI0000295;Name=hsa-mir-218-2  
Total reads = 4

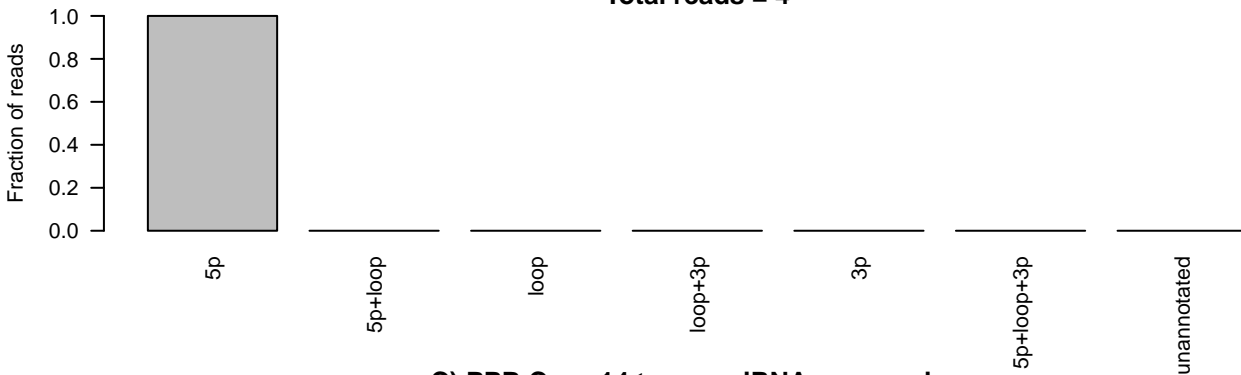

**C) PPB Case 14 tumor miRNA sequencing**  
ID=MI0000295\_1;accession\_number=MI0000295;Name=hsa-mir-218-2  
Total reads = 1

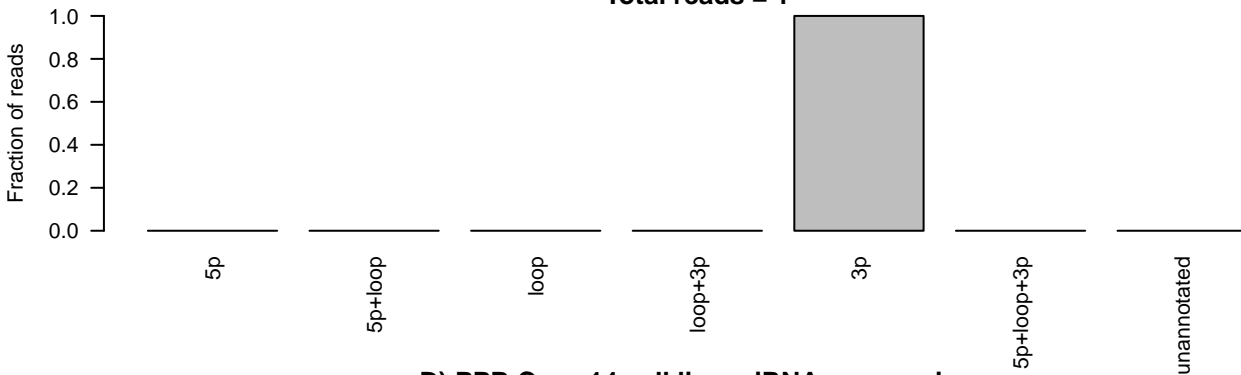

**D) PPB Case 14 cell line miRNA sequencing**  
ID=MI0000295\_1;accession\_number=MI0000295;Name=hsa-mir-218-2  
Total reads = 0



**B) Normal fibroblast miRNA sequencing**  
ID=MI0000816\_1;accession\_number=MI0000816;Name=hsa-mir-335  
Total reads = 4

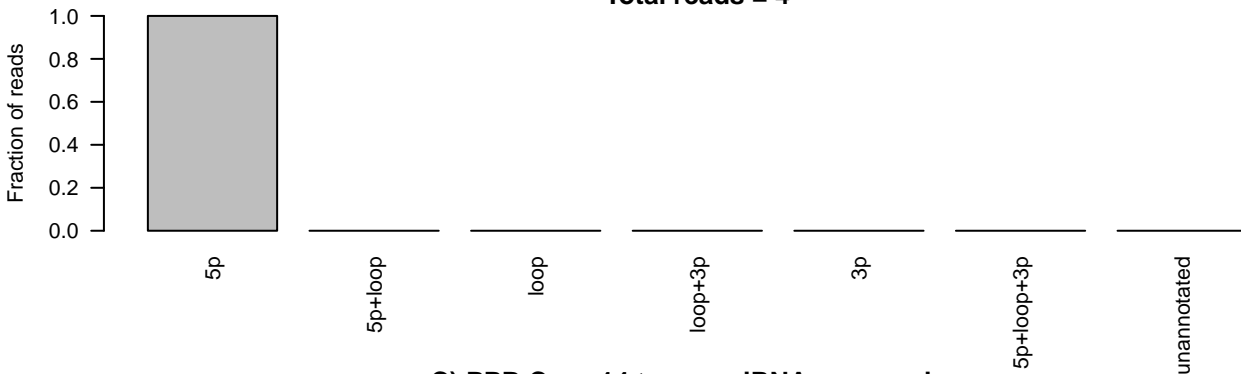

**C) PPB Case 14 tumor miRNA sequencing**  
ID=MI0000816\_1;accession\_number=MI0000816;Name=hsa-mir-335  
Total reads = 589

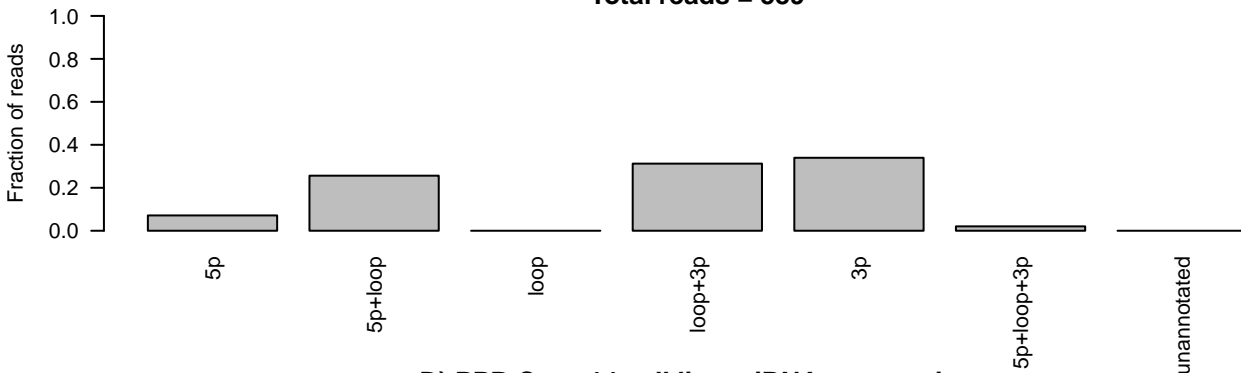

**D) PPB Case 14 cell line miRNA sequencing**  
ID=MI0000816\_1;accession\_number=MI0000816;Name=hsa-mir-335  
Total reads = 17

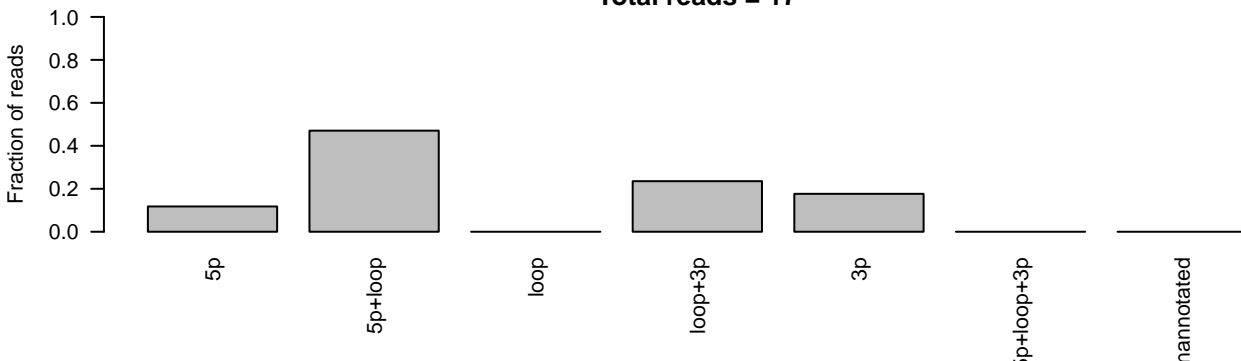

**B) Normal fibroblast miRNA sequencing**  
ID=MI0022211\_1;accession\_number=MI0022211;Name=hsa-mir-6500  
Total reads = 3

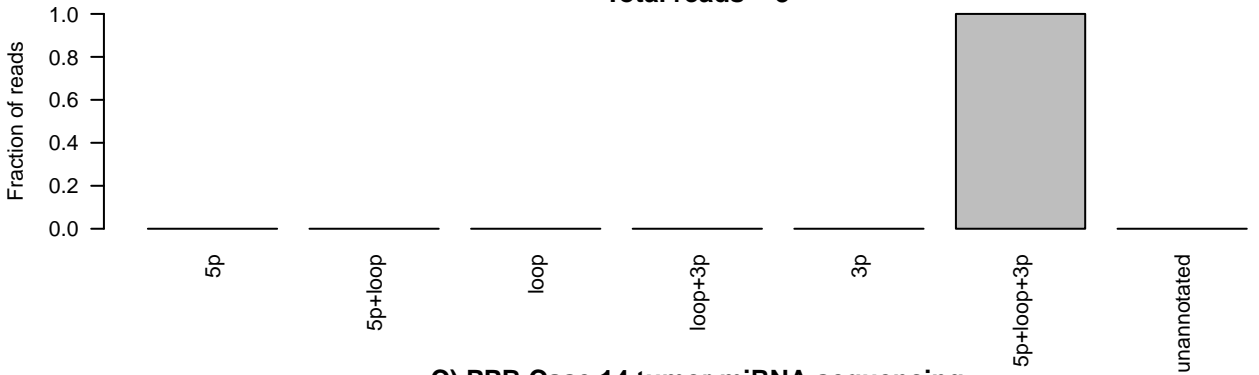

**C) PPB Case 14 tumor miRNA sequencing**  
ID=MI0022211\_1;accession\_number=MI0022211;Name=hsa-mir-6500  
Total reads = 6

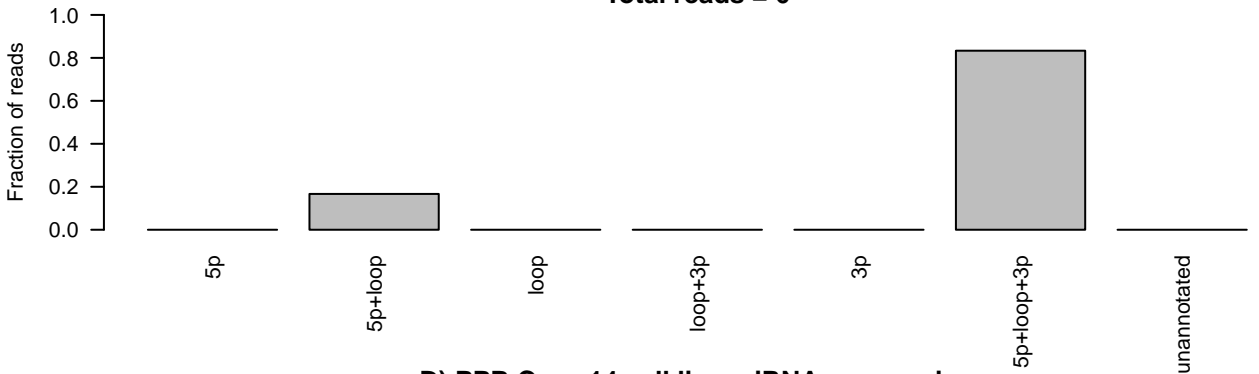

**D) PPB Case 14 cell line miRNA sequencing**  
ID=MI0022211\_1;accession\_number=MI0022211;Name=hsa-mir-6500  
Total reads = 0



**B) Normal fibroblast miRNA sequencing**  
ID=MI0014130\_1;accession\_number=MI0014130;Name=hsa-mir-3117  
Total reads = 3

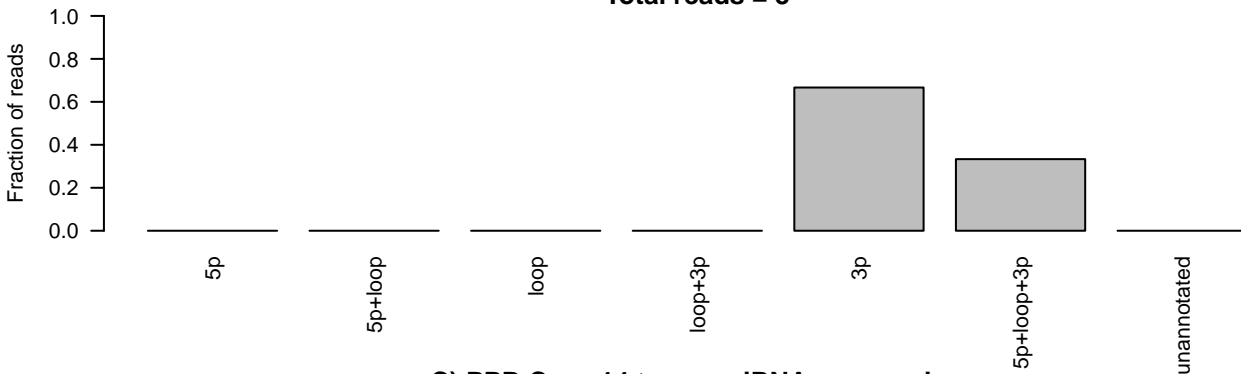

**C) PPB Case 14 tumor miRNA sequencing**  
ID=MI0014130\_1;accession\_number=MI0014130;Name=hsa-mir-3117  
Total reads = 0



**D) PPB Case 14 cell line miRNA sequencing**  
ID=MI0014130\_1;accession\_number=MI0014130;Name=hsa-mir-3117  
Total reads = 0





### B) Normal fibroblast miRNA sequencing

ID=MI0000289\_1;accession\_number=MI0000289;Name=hsa-mir-181a-1

Total reads = 3

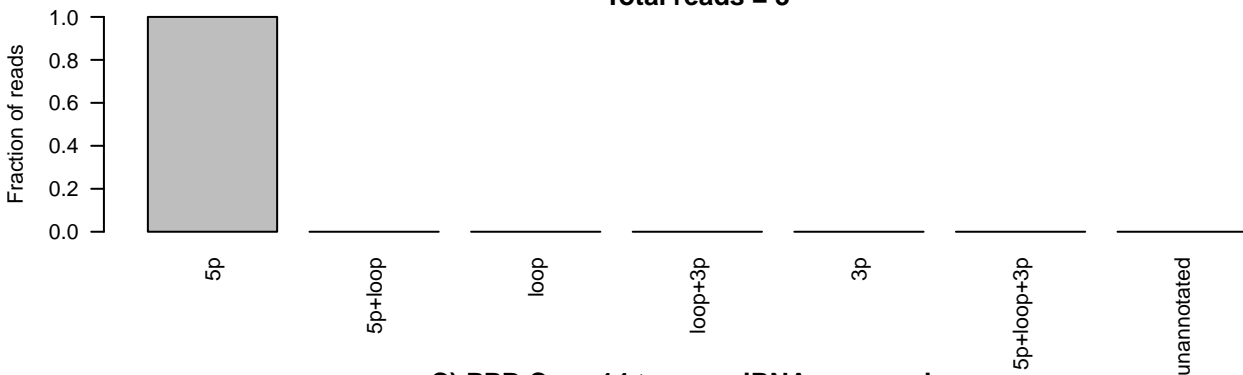

### C) PPB Case 14 tumor miRNA sequencing

ID=MI0000289\_1;accession\_number=MI0000289;Name=hsa-mir-181a-1

Total reads = 5

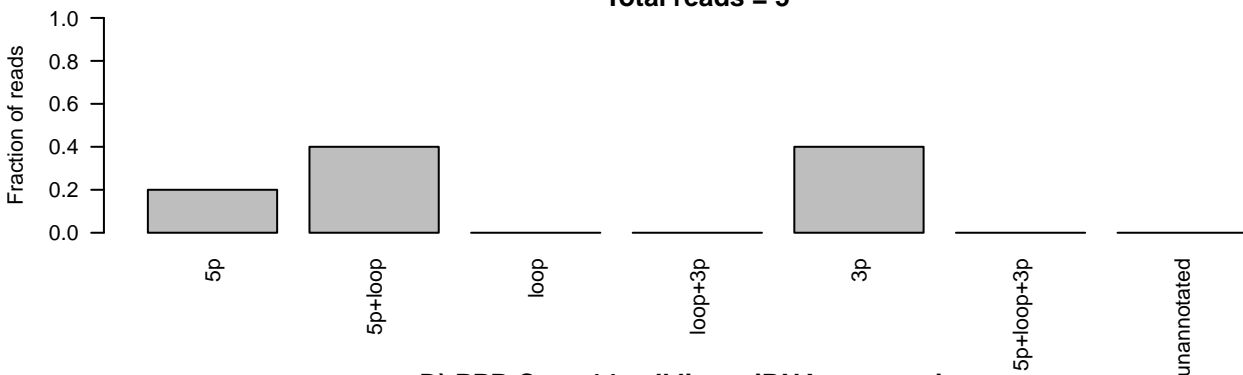

### D) PPB Case 14 cell line miRNA sequencing

ID=MI0000289\_1;accession\_number=MI0000289;Name=hsa-mir-181a-1

Total reads = 20

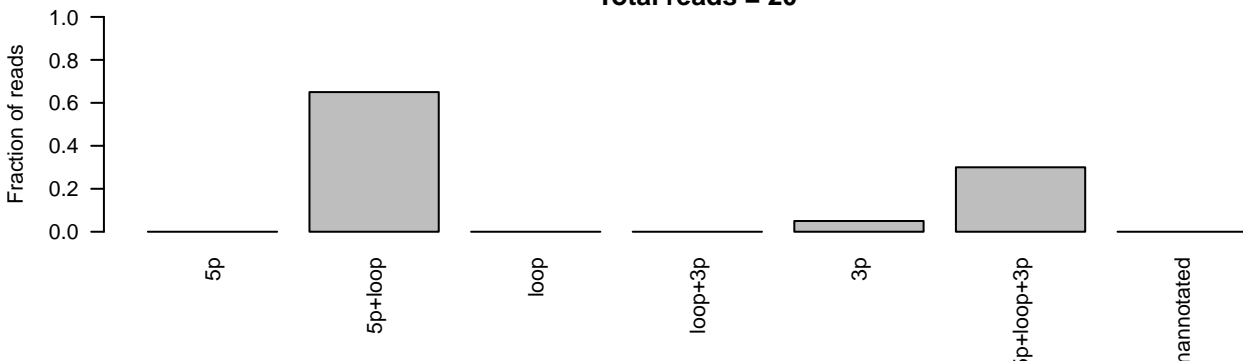

**B) Normal fibroblast miRNA sequencing**  
ID=MI0006442\_1;accession\_number=MI0006442;Name=hsa-mir-664a  
Total reads = 1

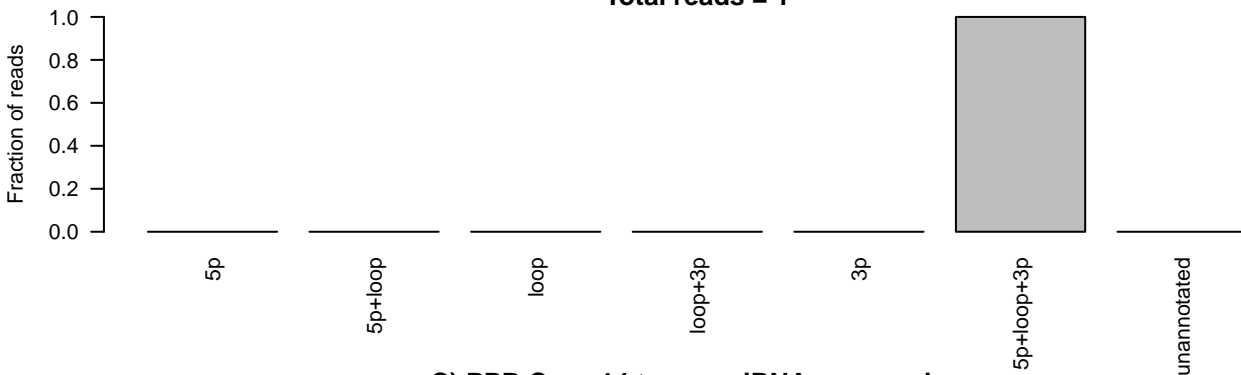

**C) PPB Case 14 tumor miRNA sequencing**  
ID=MI0006442\_1;accession\_number=MI0006442;Name=hsa-mir-664a  
Total reads = 0

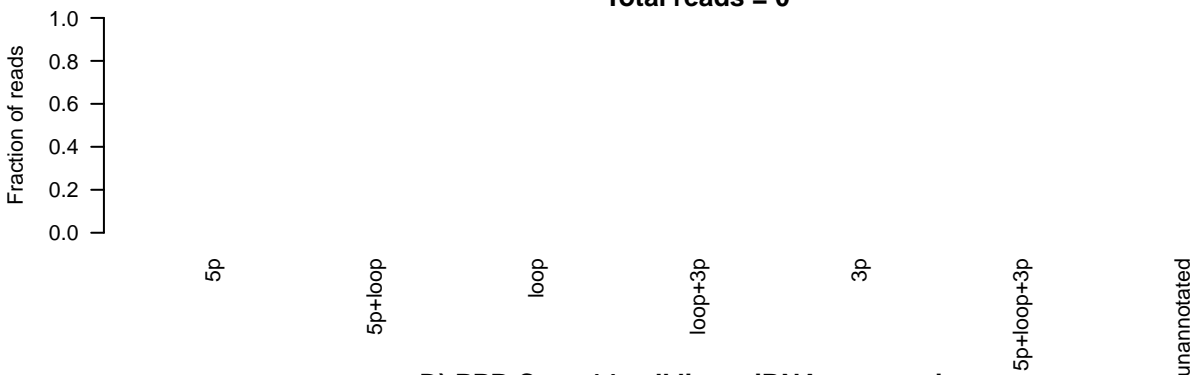

**D) PPB Case 14 cell line miRNA sequencing**  
ID=MI0006442\_1;accession\_number=MI0006442;Name=hsa-mir-664a  
Total reads = 1

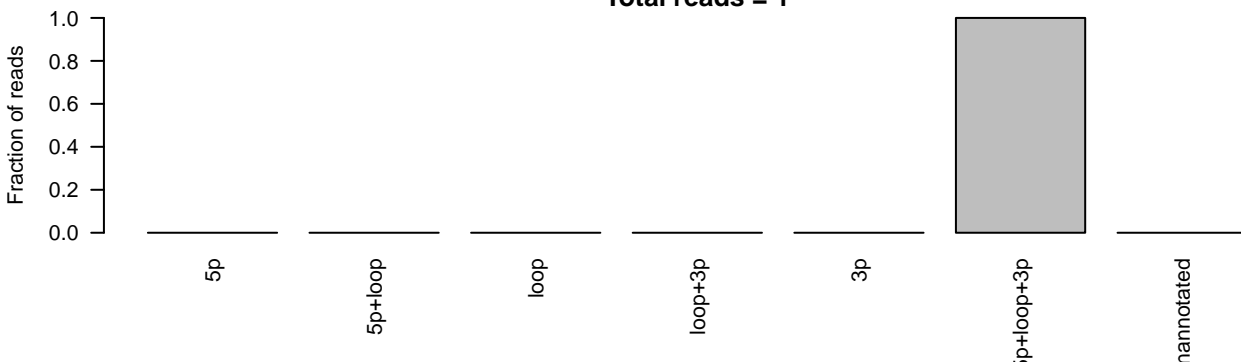

**B) Normal fibroblast miRNA sequencing**  
ID=MI0010629\_1;accession\_number=MI0010629;Name=hsa-mir-2110  
Total reads = 3

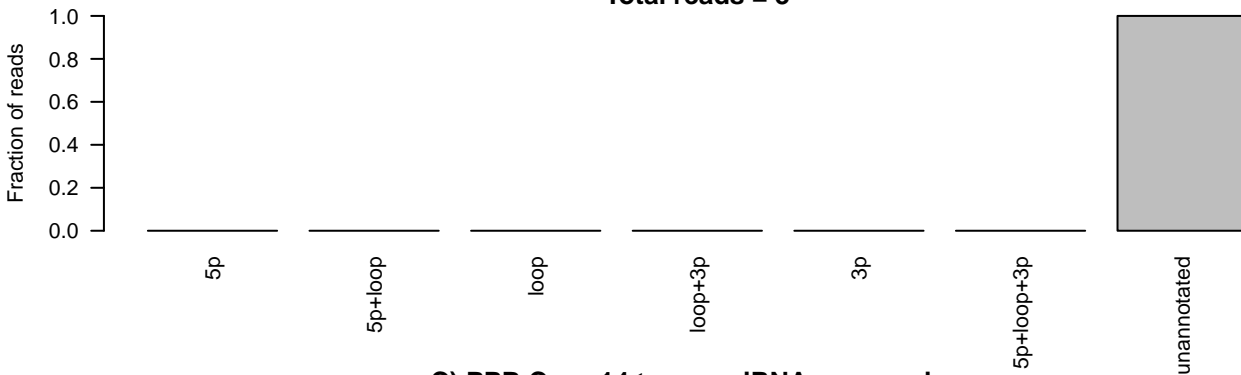

**C) PPB Case 14 tumor miRNA sequencing**  
ID=MI0010629\_1;accession\_number=MI0010629;Name=hsa-mir-2110  
Total reads = 0



**D) PPB Case 14 cell line miRNA sequencing**  
ID=MI0010629\_1;accession\_number=MI0010629;Name=hsa-mir-2110  
Total reads = 0



**B) Normal fibroblast miRNA sequencing**  
ID=MI0000812\_1;accession\_number=MI0000812;Name=hsa-mir-331  
Total reads = 3

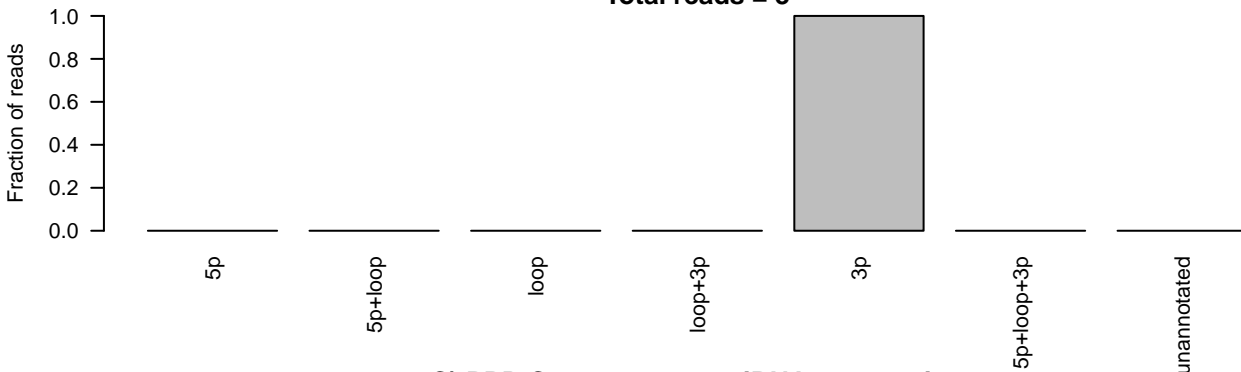

**C) PPB Case 14 tumor miRNA sequencing**  
ID=MI0000812\_1;accession\_number=MI0000812;Name=hsa-mir-331  
Total reads = 7

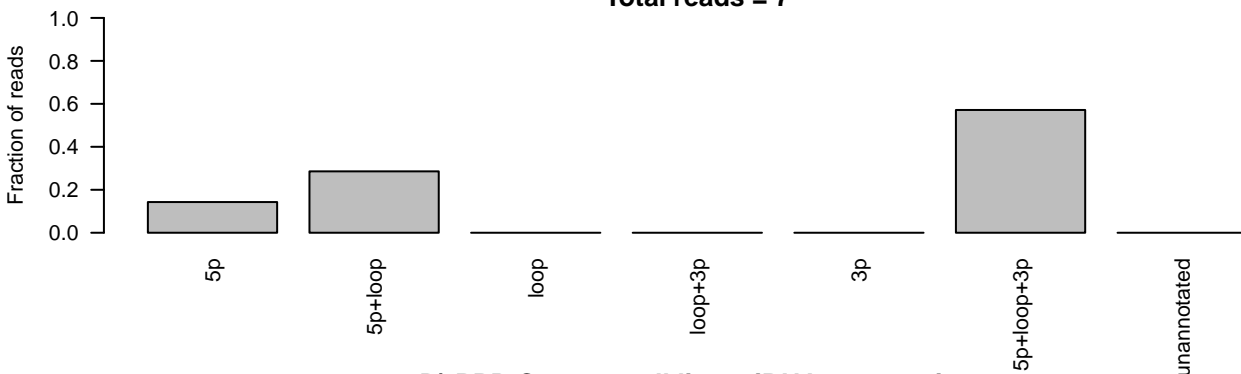

**D) PPB Case 14 cell line miRNA sequencing**  
ID=MI0000812\_1;accession\_number=MI0000812;Name=hsa-mir-331  
Total reads = 1



**B) Normal fibroblast miRNA sequencing**  
ID=MI0000825\_1;accession\_number=MI0000825;Name=hsa-mir-345  
Total reads = 3

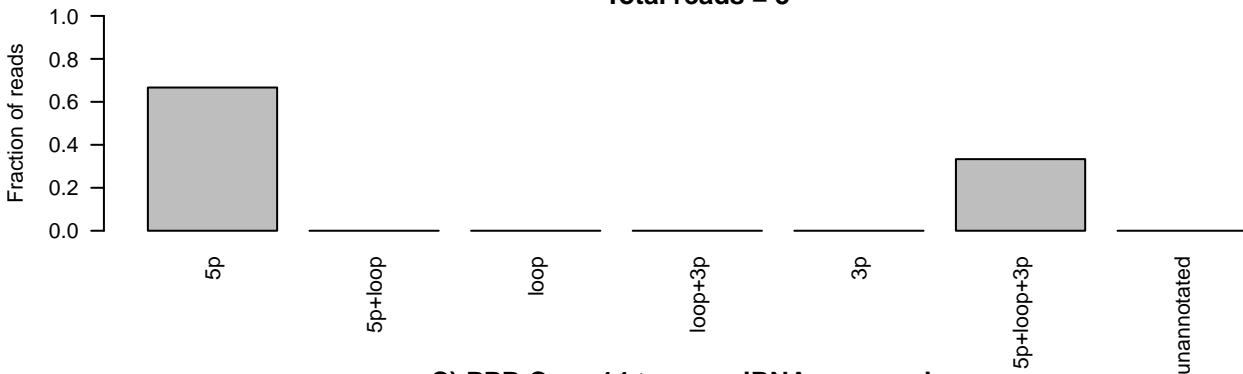

**C) PPB Case 14 tumor miRNA sequencing**  
ID=MI0000825\_1;accession\_number=MI0000825;Name=hsa-mir-345  
Total reads = 5

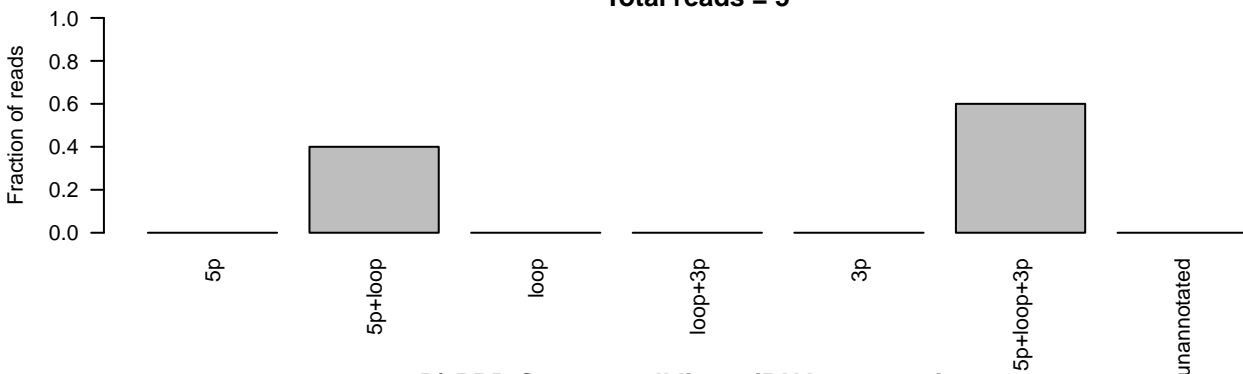

**D) PPB Case 14 cell line miRNA sequencing**  
ID=MI0000825\_1;accession\_number=MI0000825;Name=hsa-mir-345  
Total reads = 1



**B) Normal fibroblast miRNA sequencing**  
ID=MI0000778\_1;accession\_number=MI0000778;Name=hsa-mir-370  
Total reads = 3

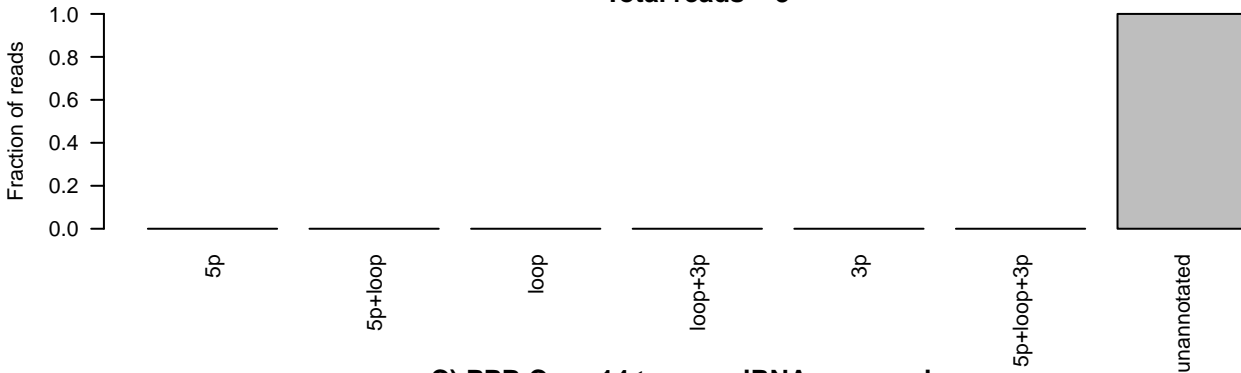

**C) PPB Case 14 tumor miRNA sequencing**  
ID=MI0000778\_1;accession\_number=MI0000778;Name=hsa-mir-370  
Total reads = 7

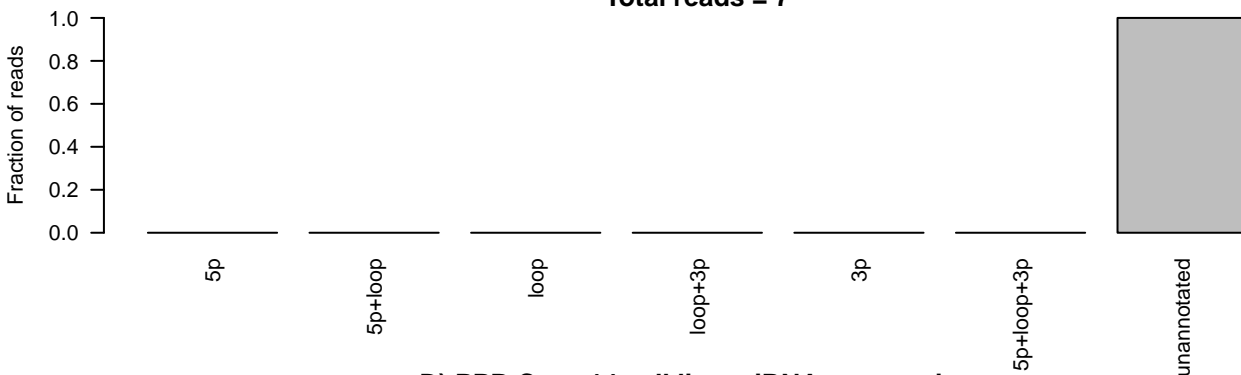

**D) PPB Case 14 cell line miRNA sequencing**  
ID=MI0000778\_1;accession\_number=MI0000778;Name=hsa-mir-370  
Total reads = 4

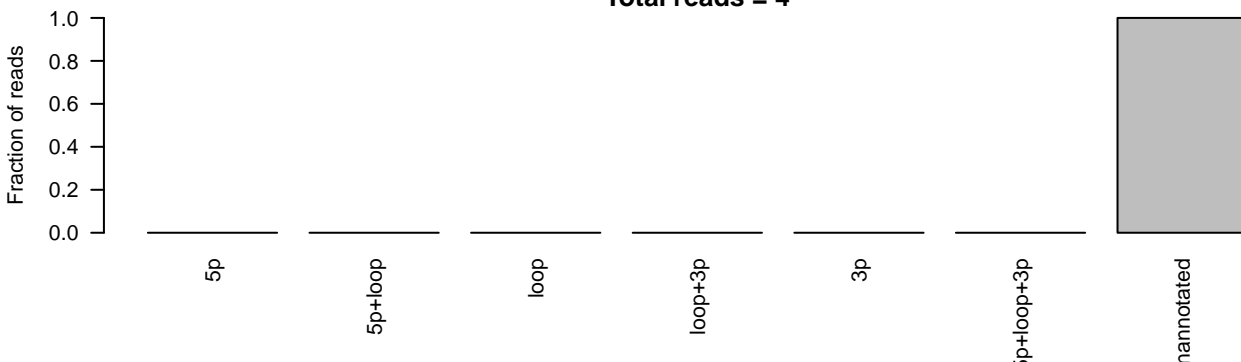

**B) Normal fibroblast miRNA sequencing**  
ID=MI0000784\_1;accession\_number=MI0000784;Name=hsa-mir-376a-1  
Total reads = 3

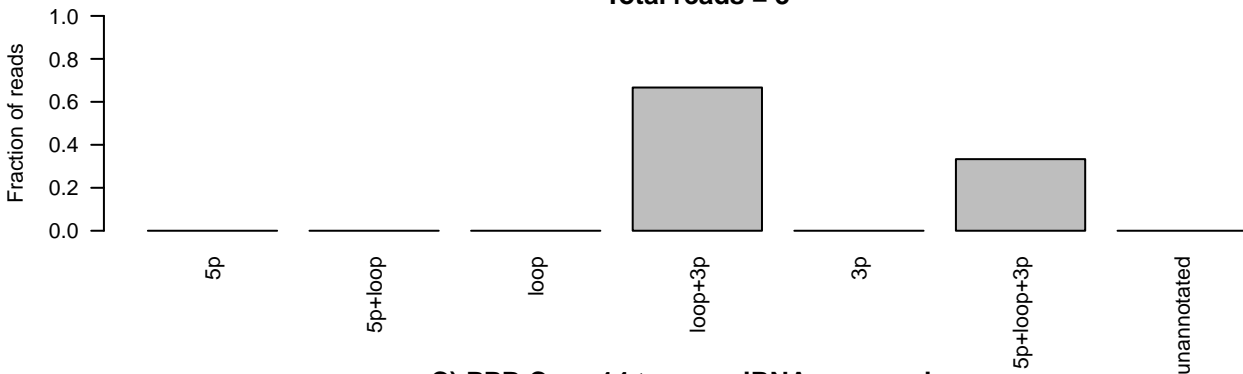

**C) PPB Case 14 tumor miRNA sequencing**  
ID=MI0000784\_1;accession\_number=MI0000784;Name=hsa-mir-376a-1  
Total reads = 98

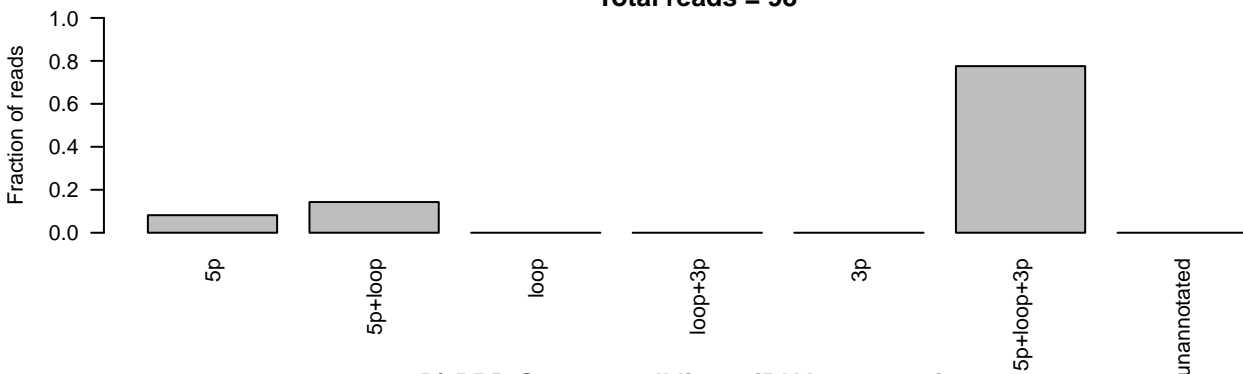

**D) PPB Case 14 cell line miRNA sequencing**  
ID=MI0000784\_1;accession\_number=MI0000784;Name=hsa-mir-376a-1  
Total reads = 57

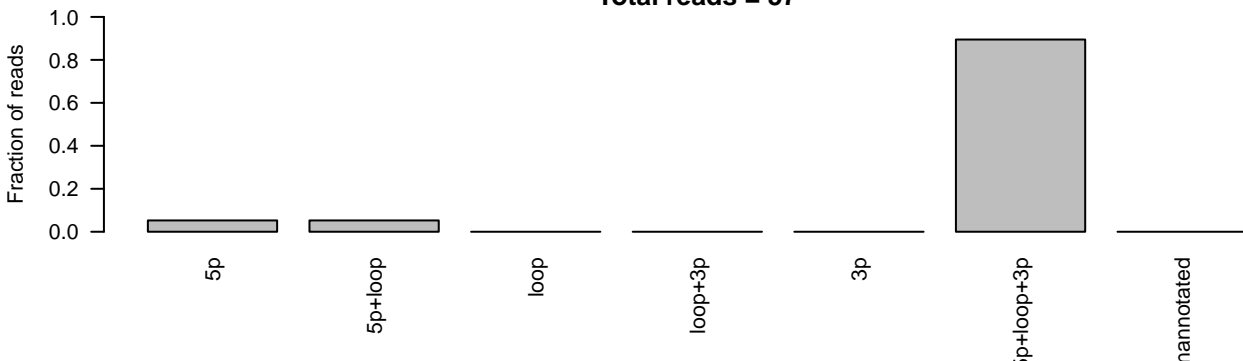

**B) Normal fibroblast miRNA sequencing**  
ID=MI0005762\_1;accession\_number=MI0005762;Name=hsa-mir-940  
Total reads = 3

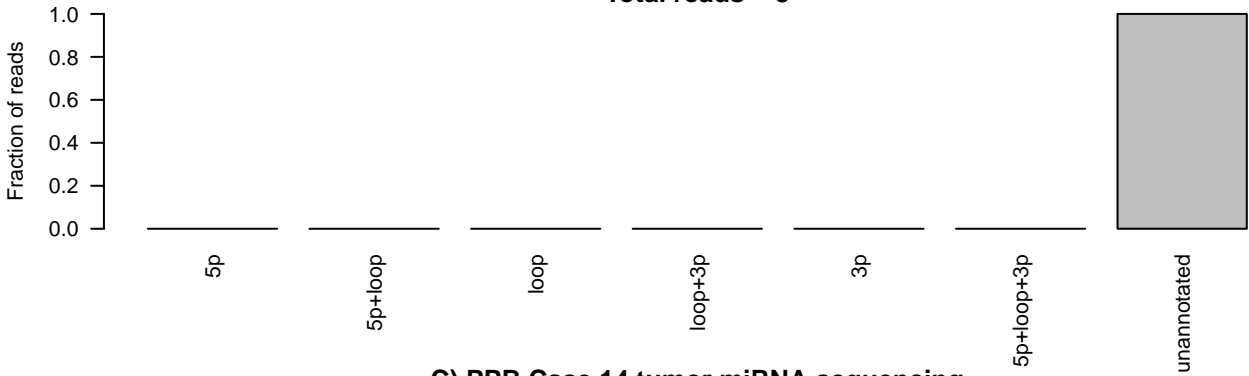

**C) PPB Case 14 tumor miRNA sequencing**  
ID=MI0005762\_1;accession\_number=MI0005762;Name=hsa-mir-940  
Total reads = 2

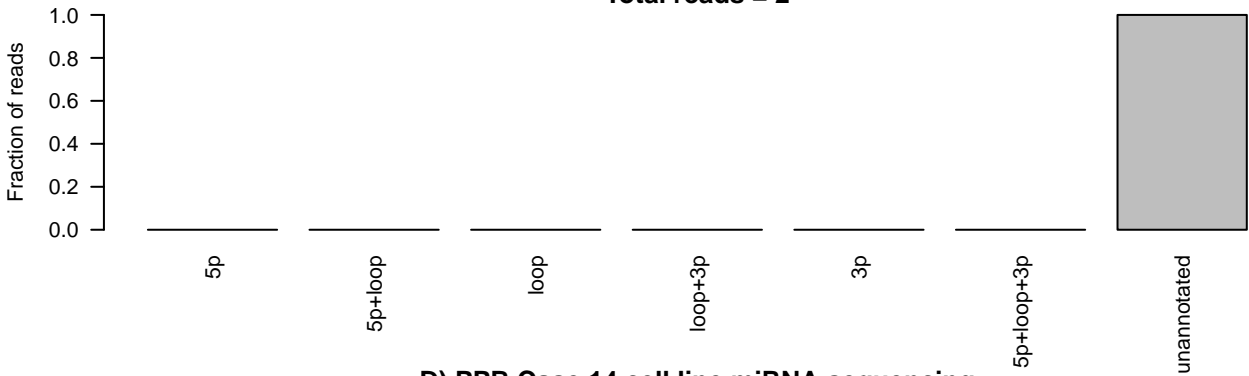

**D) PPB Case 14 cell line miRNA sequencing**  
ID=MI0005762\_1;accession\_number=MI0005762;Name=hsa-mir-940  
Total reads = 0

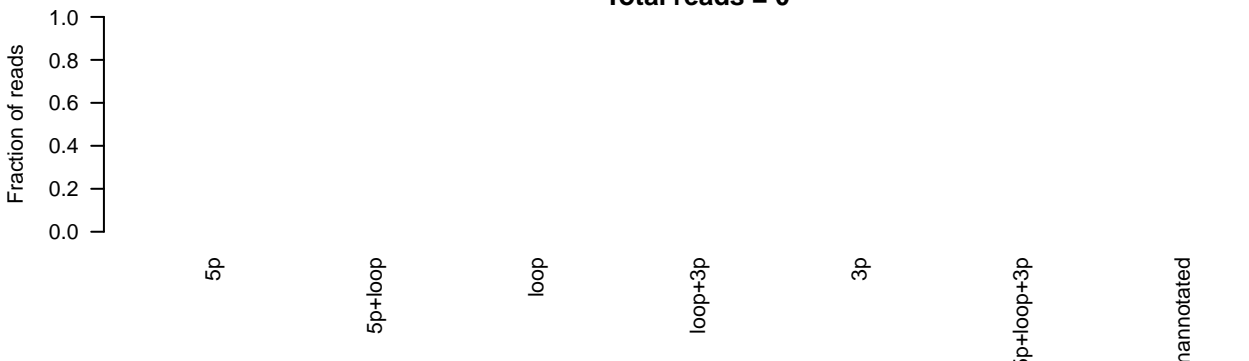



**B) Normal fibroblast miRNA sequencing**  
ID=MI0000489\_1;accession\_number=MI0000489;Name=hsa-mir-195  
Total reads = 3

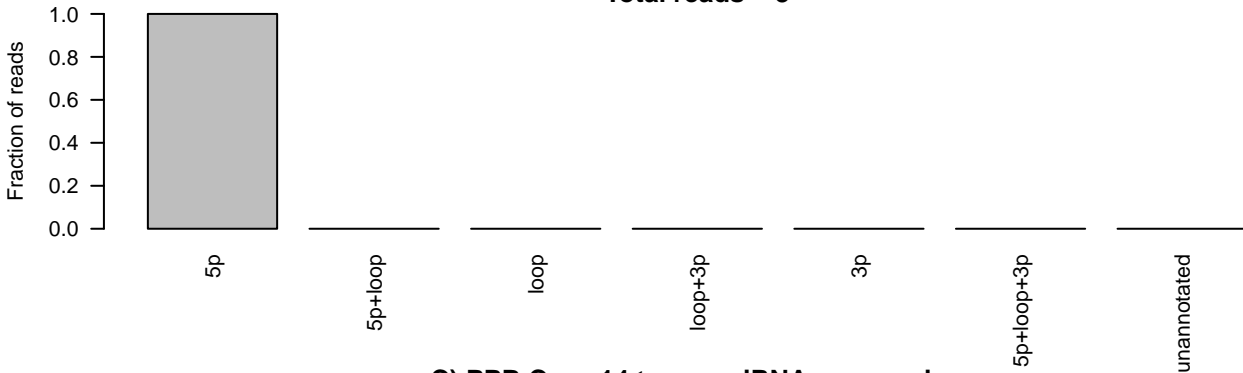

**C) PPB Case 14 tumor miRNA sequencing**  
ID=MI0000489\_1;accession\_number=MI0000489;Name=hsa-mir-195  
Total reads = 0

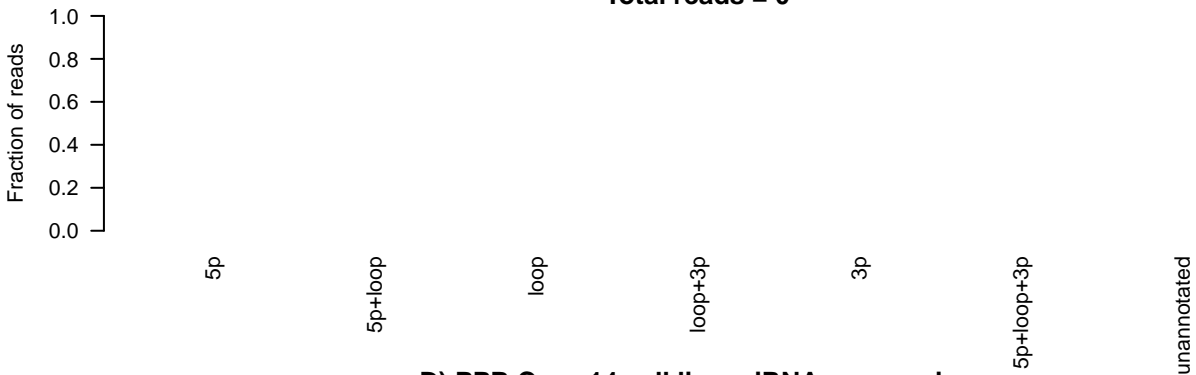

**D) PPB Case 14 cell line miRNA sequencing**  
ID=MI0000489\_1;accession\_number=MI0000489;Name=hsa-mir-195  
Total reads = 0



**B) Normal fibroblast miRNA sequencing**  
ID=MI0006273\_1;accession\_number=MI0006273;Name=hsa-mir-1180  
Total reads = 1

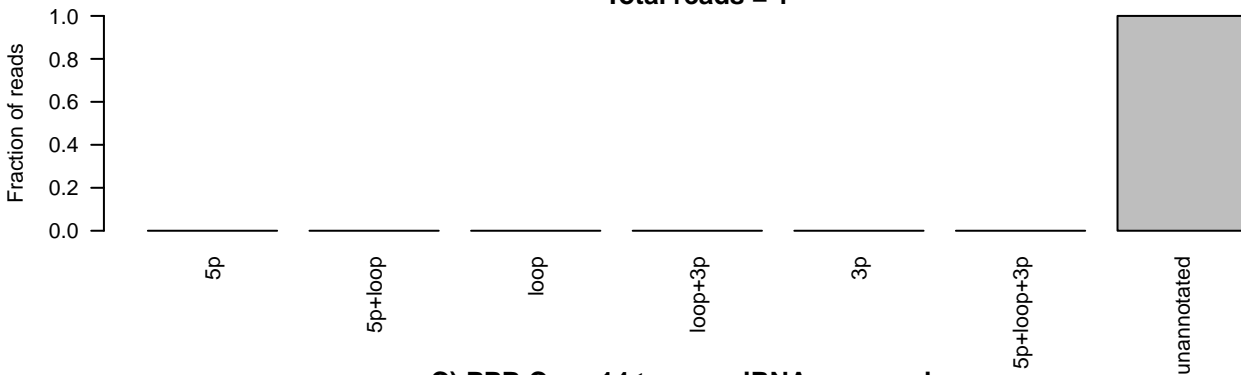

**C) PPB Case 14 tumor miRNA sequencing**  
ID=MI0006273\_1;accession\_number=MI0006273;Name=hsa-mir-1180  
Total reads = 1

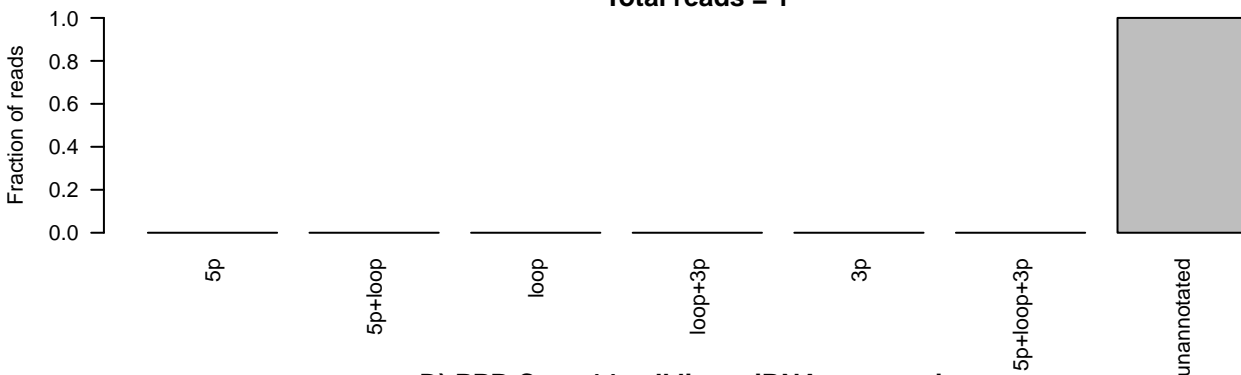

**D) PPB Case 14 cell line miRNA sequencing**  
ID=MI0006273\_1;accession\_number=MI0006273;Name=hsa-mir-1180  
Total reads = 0



### B) Normal fibroblast miRNA sequencing

ID=MI0003778\_1;accession\_number=MI0003778;Name=hsa-mir-320c-1

Total reads = 3

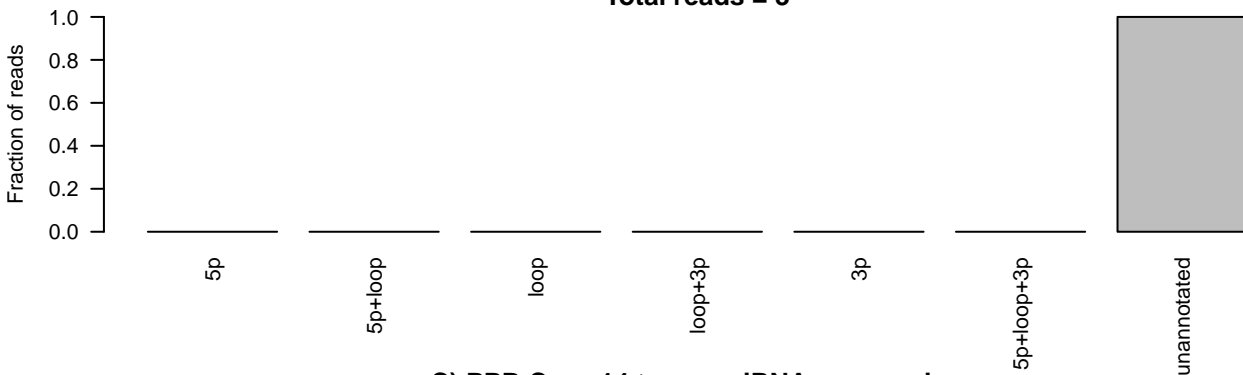

### C) PPB Case 14 tumor miRNA sequencing

ID=MI0003778\_1;accession\_number=MI0003778;Name=hsa-mir-320c-1

Total reads = 0



### D) PPB Case 14 cell line miRNA sequencing

ID=MI0003778\_1;accession\_number=MI0003778;Name=hsa-mir-320c-1

Total reads = 2

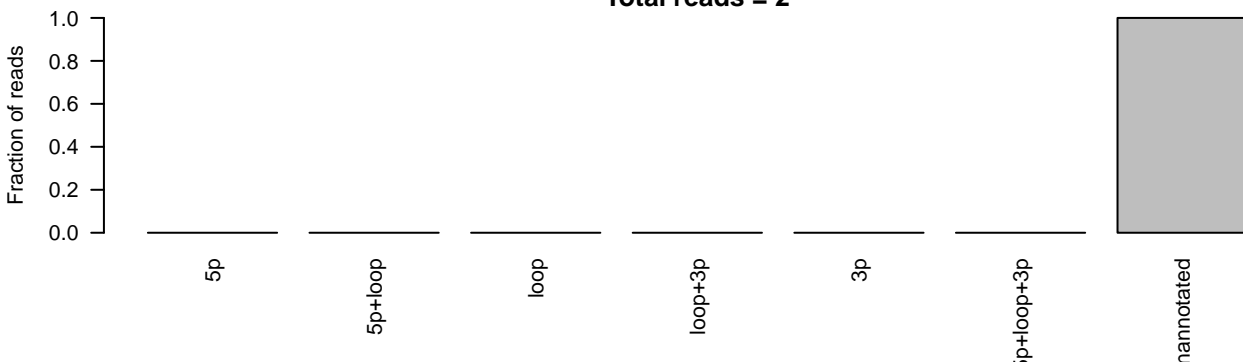

**B) Normal fibroblast miRNA sequencing**  
ID=MI0000803\_1;accession\_number=MI0000803;Name=hsa-mir-330  
Total reads = 3

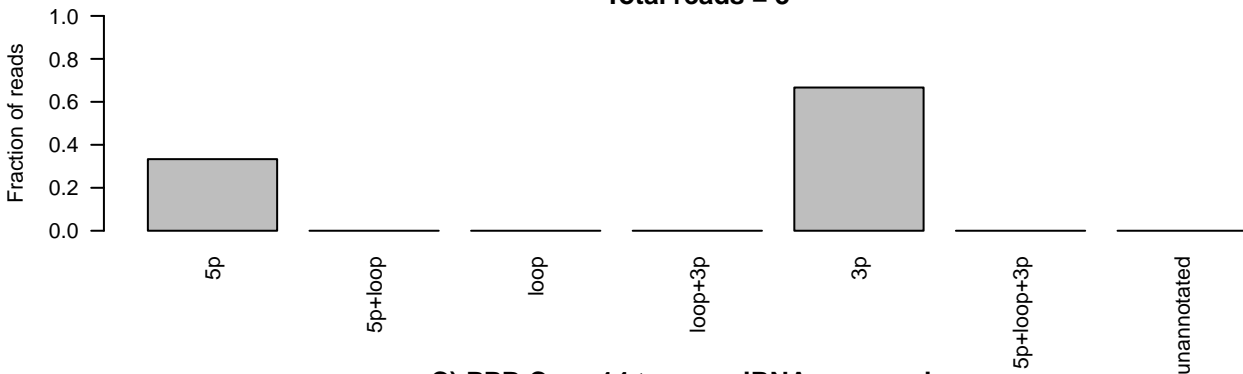

**C) PPB Case 14 tumor miRNA sequencing**  
ID=MI0000803\_1;accession\_number=MI0000803;Name=hsa-mir-330  
Total reads = 0



**D) PPB Case 14 cell line miRNA sequencing**  
ID=MI0000803\_1;accession\_number=MI0000803;Name=hsa-mir-330  
Total reads = 2

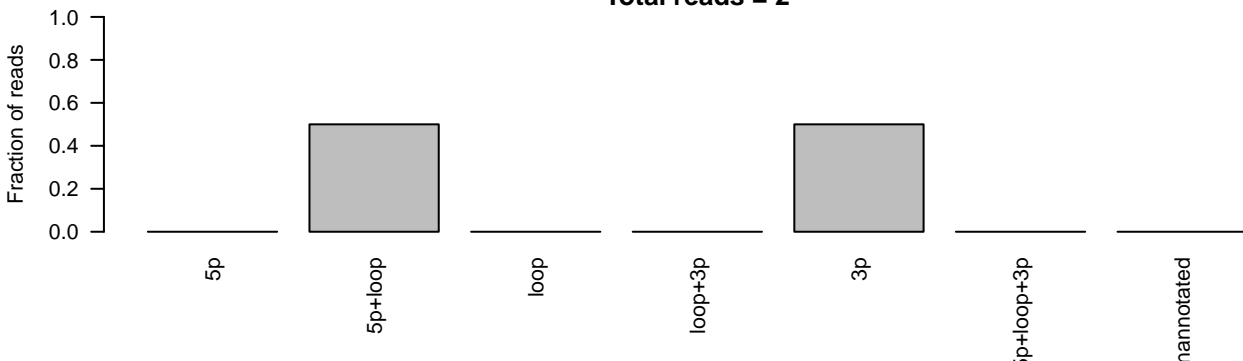

**B) Normal fibroblast miRNA sequencing**  
ID=MI0006433\_1;accession\_number=MI0006433;Name=hsa-mir-1292  
Total reads = 3

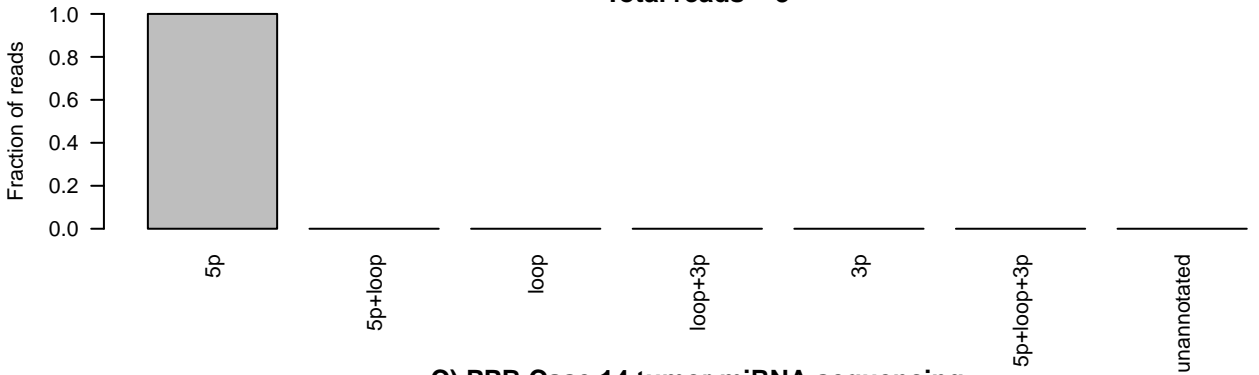

**C) PPB Case 14 tumor miRNA sequencing**  
ID=MI0006433\_1;accession\_number=MI0006433;Name=hsa-mir-1292  
Total reads = 1

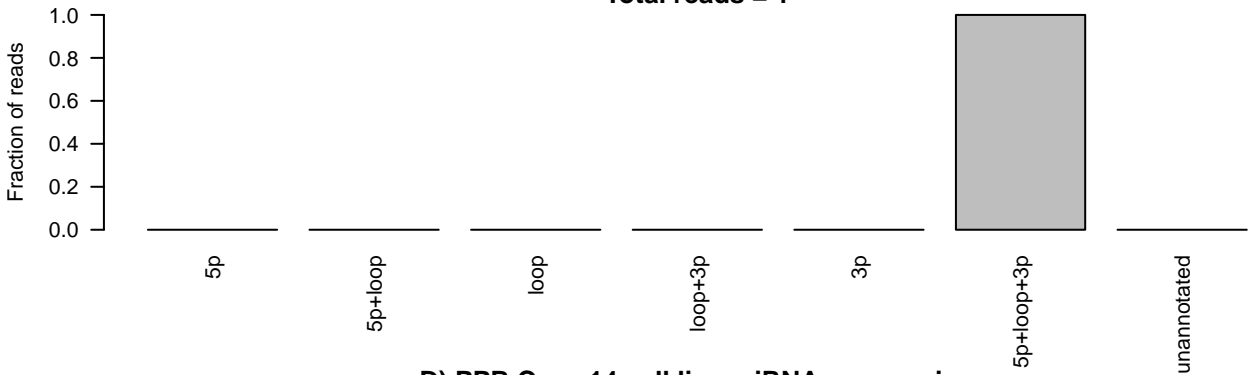

**D) PPB Case 14 cell line miRNA sequencing**  
ID=MI0006433\_1;accession\_number=MI0006433;Name=hsa-mir-1292  
Total reads = 0

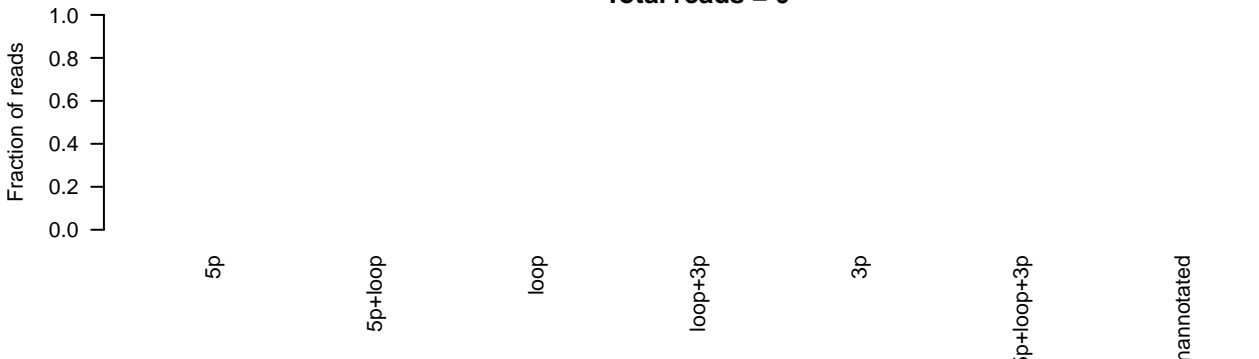

**B) Normal fibroblast miRNA sequencing**  
ID=MI0000747\_1;accession\_number=MI0000747;Name=hsa-mir-296  
Total reads = 3



**C) PPB Case 14 tumor miRNA sequencing**  
ID=MI0000747\_1;accession\_number=MI0000747;Name=hsa-mir-296  
Total reads = 0

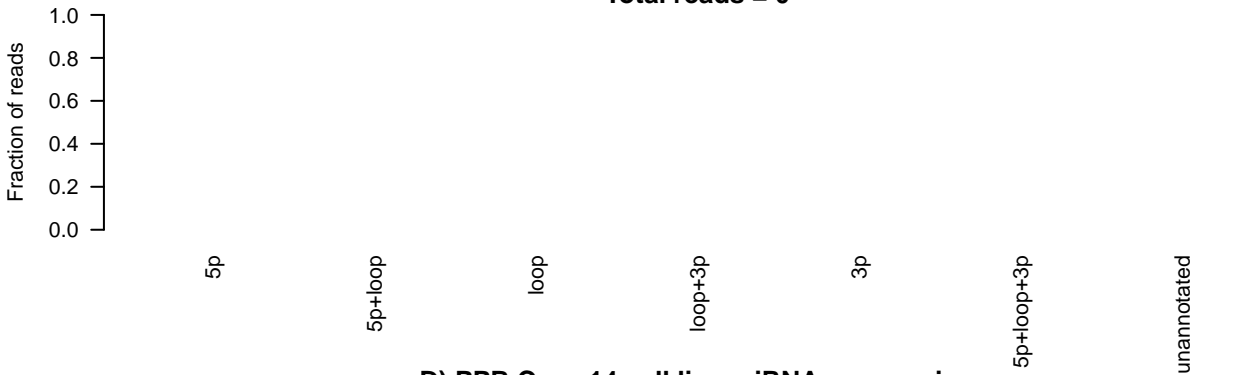

**D) PPB Case 14 cell line miRNA sequencing**  
ID=MI0000747\_1;accession\_number=MI0000747;Name=hsa-mir-296  
Total reads = 0



**B) Normal fibroblast miRNA sequencing**  
ID=MI0000091\_1;accession\_number=MI0000091;Name=hsa-mir-33a  
Total reads = 2

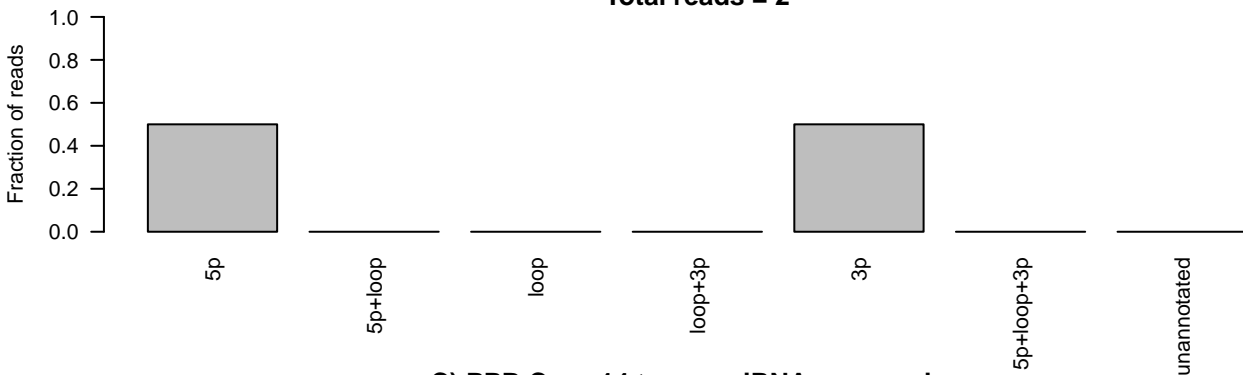

**C) PPB Case 14 tumor miRNA sequencing**  
ID=MI0000091\_1;accession\_number=MI0000091;Name=hsa-mir-33a  
Total reads = 10

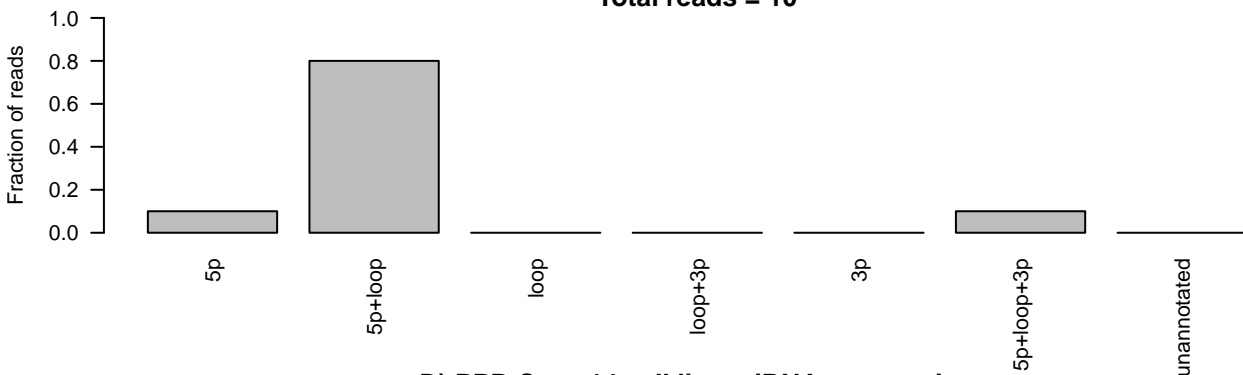

**D) PPB Case 14 cell line miRNA sequencing**  
ID=MI0000091\_1;accession\_number=MI0000091;Name=hsa-mir-33a  
Total reads = 0



**B) Normal fibroblast miRNA sequencing**  
ID=MI0003125\_1;accession\_number=MI0003125;Name=hsa-mir-490  
Total reads = 3

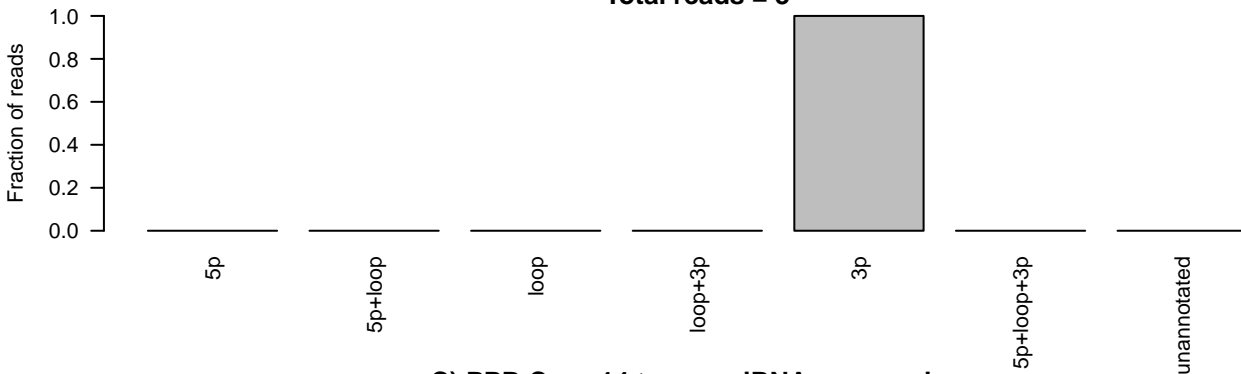

**C) PPB Case 14 tumor miRNA sequencing**  
ID=MI0003125\_1;accession\_number=MI0003125;Name=hsa-mir-490  
Total reads = 0



**D) PPB Case 14 cell line miRNA sequencing**  
ID=MI0003125\_1;accession\_number=MI0003125;Name=hsa-mir-490  
Total reads = 0





**B) Normal fibroblast miRNA sequencing**  
ID=MI0000464\_1;accession\_number=MI0000464;Name=hsa-mir-153-2  
Total reads = 3

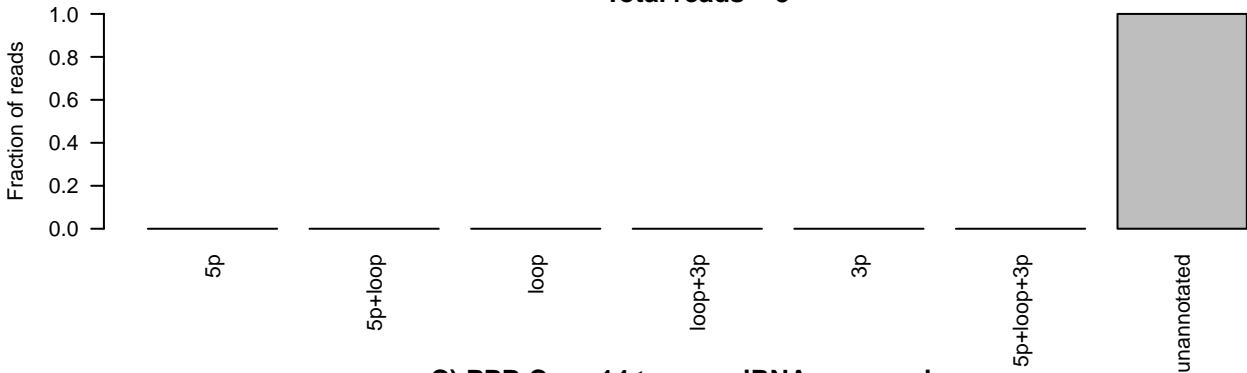

**C) PPB Case 14 tumor miRNA sequencing**  
ID=MI0000464\_1;accession\_number=MI0000464;Name=hsa-mir-153-2  
Total reads = 1

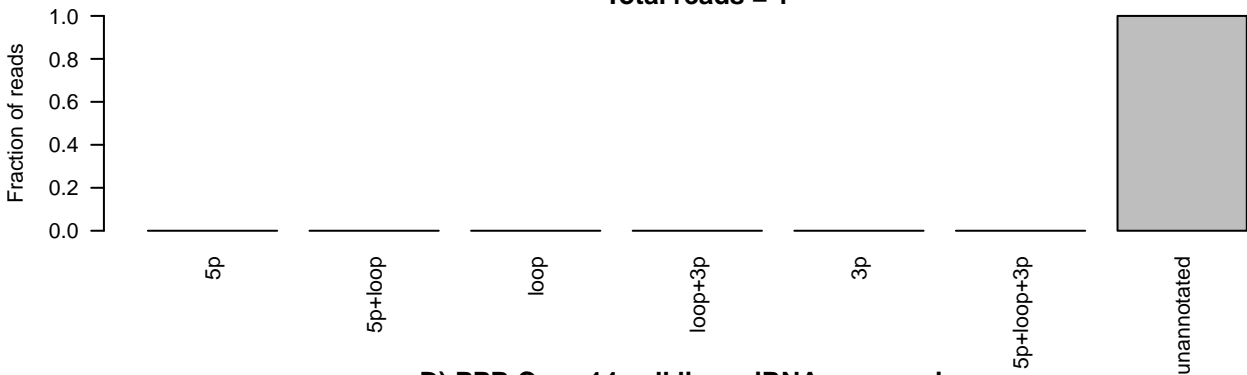

**D) PPB Case 14 cell line miRNA sequencing**  
ID=MI0000464\_1;accession\_number=MI0000464;Name=hsa-mir-153-2  
Total reads = 0

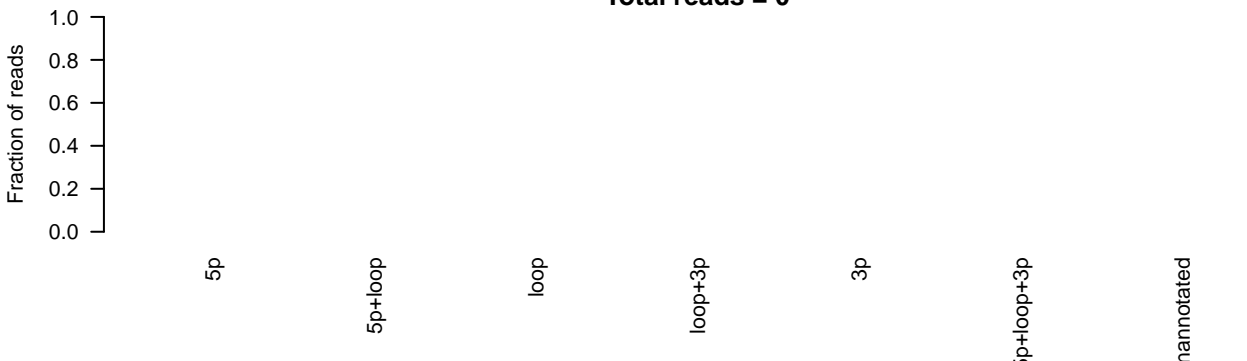

**B) Normal fibroblast miRNA sequencing**  
ID=MI0016051\_1;accession\_number=MI0016051;Name=hsa-mir-3651  
Total reads = 0



**C) PPB Case 14 tumor miRNA sequencing**  
ID=MI0016051\_1;accession\_number=MI0016051;Name=hsa-mir-3651  
Total reads = 0



**D) PPB Case 14 cell line miRNA sequencing**  
ID=MI0016051\_1;accession\_number=MI0016051;Name=hsa-mir-3651  
Total reads = 0



**B) Normal fibroblast miRNA sequencing**  
ID=MI0000762\_1;accession\_number=MI0000762;Name=hsa-mir-362  
Total reads = 3

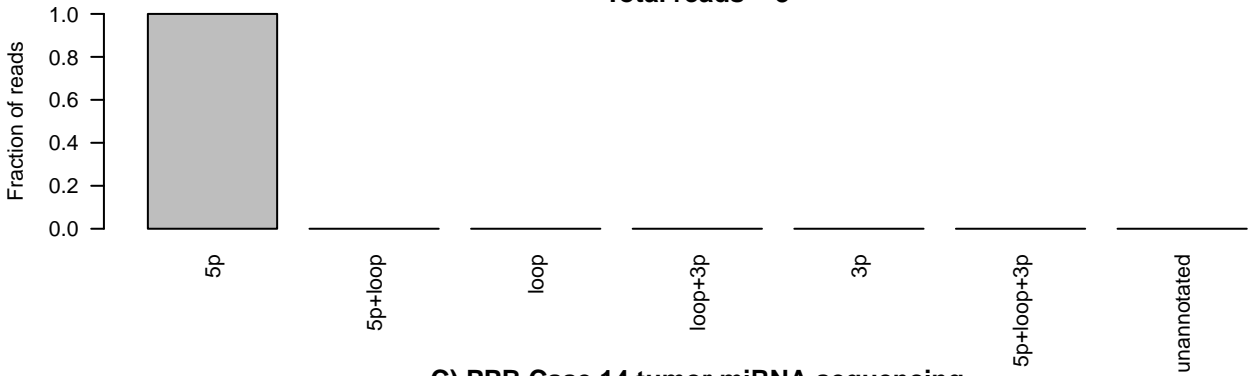

**C) PPB Case 14 tumor miRNA sequencing**  
ID=MI0000762\_1;accession\_number=MI0000762;Name=hsa-mir-362  
Total reads = 1

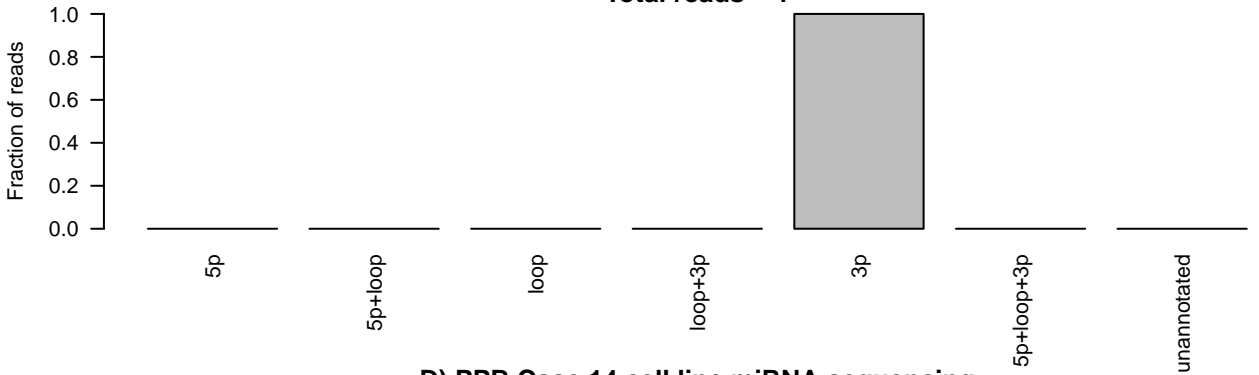

**D) PPB Case 14 cell line miRNA sequencing**  
ID=MI0000762\_1;accession\_number=MI0000762;Name=hsa-mir-362  
Total reads = 0



**B) Normal fibroblast miRNA sequencing**  
ID=MI0022558\_1;accession\_number=MI0022558;Name=hsa-mir-6723  
Total reads = 0



**C) PPB Case 14 tumor miRNA sequencing**  
ID=MI0022558\_1;accession\_number=MI0022558;Name=hsa-mir-6723  
Total reads = 0

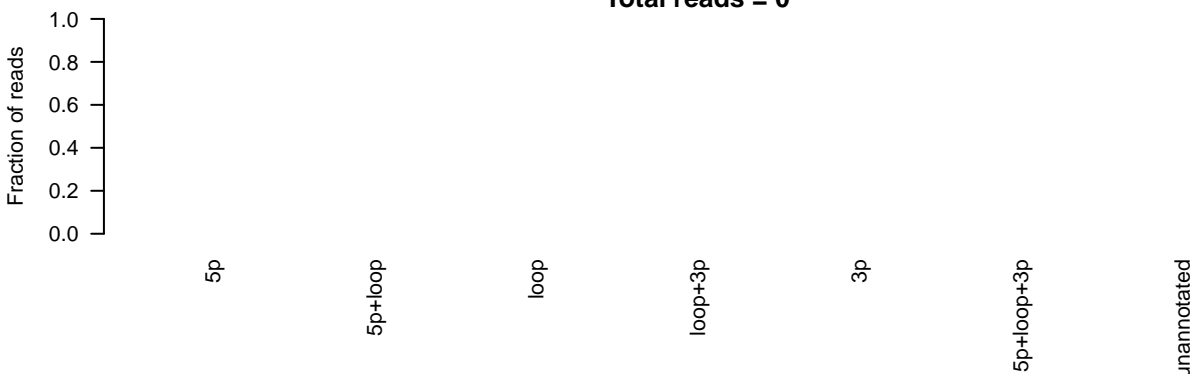

**D) PPB Case 14 cell line miRNA sequencing**  
ID=MI0022558\_1;accession\_number=MI0022558;Name=hsa-mir-6723  
Total reads = 0

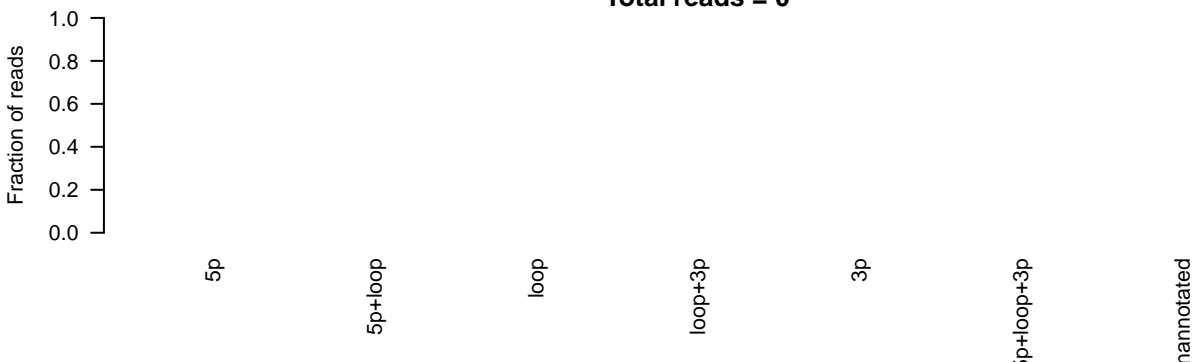

**B) Normal fibroblast miRNA sequencing**  
ID=MI0016845\_1;accession\_number=MI0016845;Name=hsa-mir-4484  
Total reads = 2

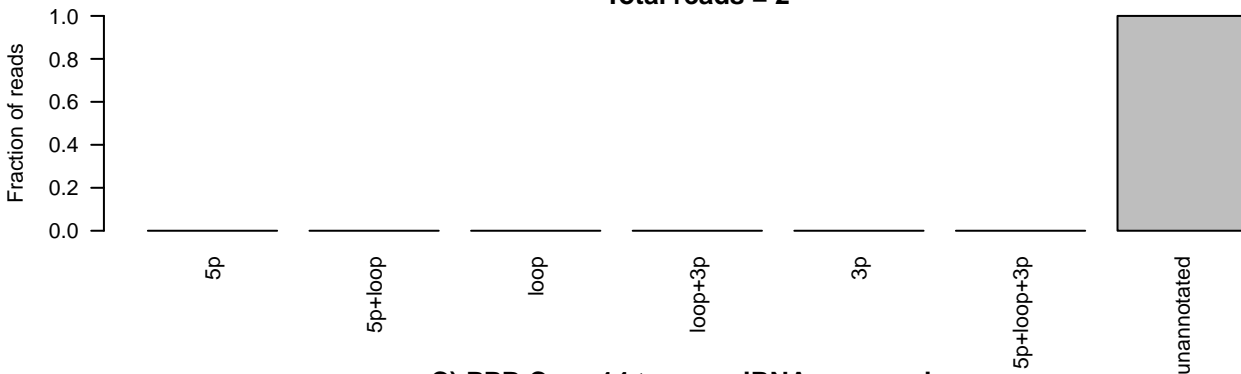

**C) PPB Case 14 tumor miRNA sequencing**  
ID=MI0016845\_1;accession\_number=MI0016845;Name=hsa-mir-4484  
Total reads = 1

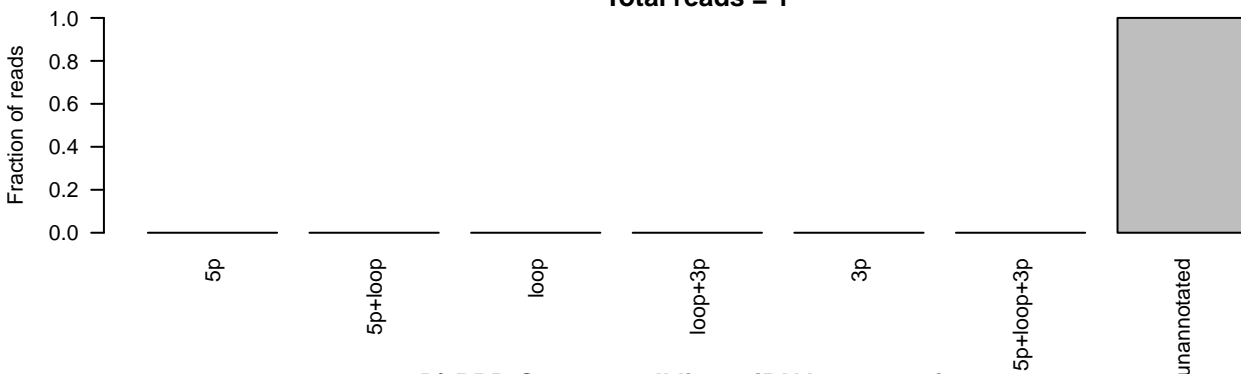

**D) PPB Case 14 cell line miRNA sequencing**  
ID=MI0016845\_1;accession\_number=MI0016845;Name=hsa-mir-4484  
Total reads = 2



**B) Normal fibroblast miRNA sequencing**  
ID=MI0016846\_1;accession\_number=MI0016846;Name=hsa-mir-4485  
Total reads = 0



**C) PPB Case 14 tumor miRNA sequencing**  
ID=MI0016846\_1;accession\_number=MI0016846;Name=hsa-mir-4485  
Total reads = 0



**D) PPB Case 14 cell line miRNA sequencing**  
ID=MI0016846\_1;accession\_number=MI0016846;Name=hsa-mir-4485  
Total reads = 0



**B) Normal fibroblast miRNA sequencing**  
ID=MI0000811\_1;accession\_number=MI0000811;Name=hsa-mir-148b  
Total reads = 2

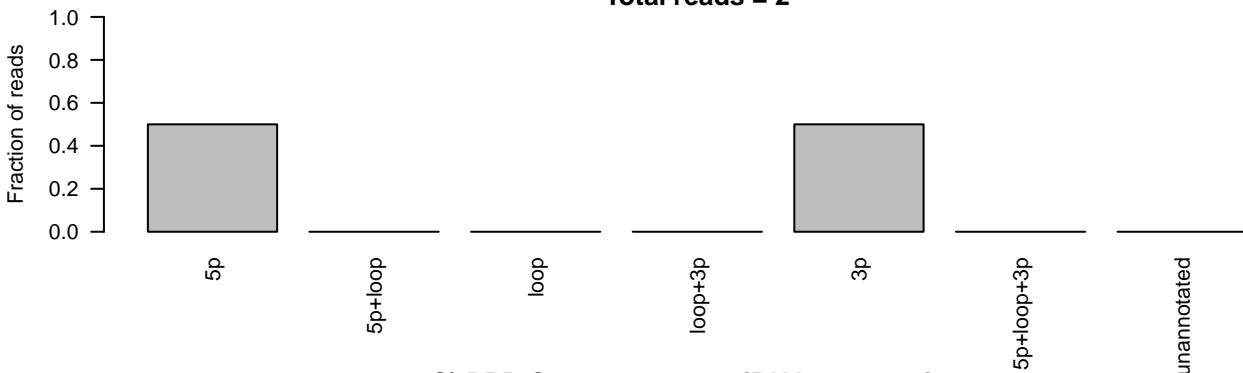

**C) PPB Case 14 tumor miRNA sequencing**  
ID=MI0000811\_1;accession\_number=MI0000811;Name=hsa-mir-148b  
Total reads = 14

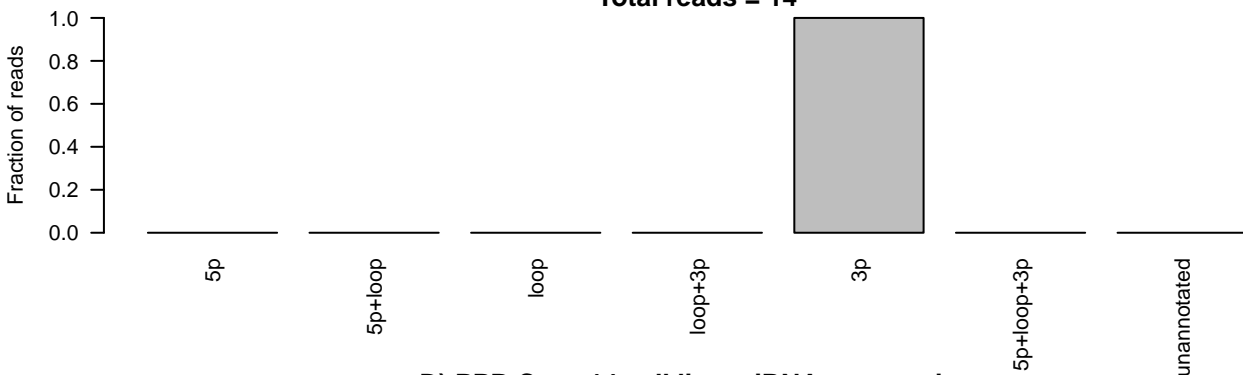

**D) PPB Case 14 cell line miRNA sequencing**  
ID=MI0000811\_1;accession\_number=MI0000811;Name=hsa-mir-148b  
Total reads = 1



**B) Normal fibroblast miRNA sequencing**  
ID=MI0000750\_1;accession\_number=MI0000750;Name=hsa-mir-26a-2  
Total reads = 1



**C) PPB Case 14 tumor miRNA sequencing**  
ID=MI0000750\_1;accession\_number=MI0000750;Name=hsa-mir-26a-2  
Total reads = 28

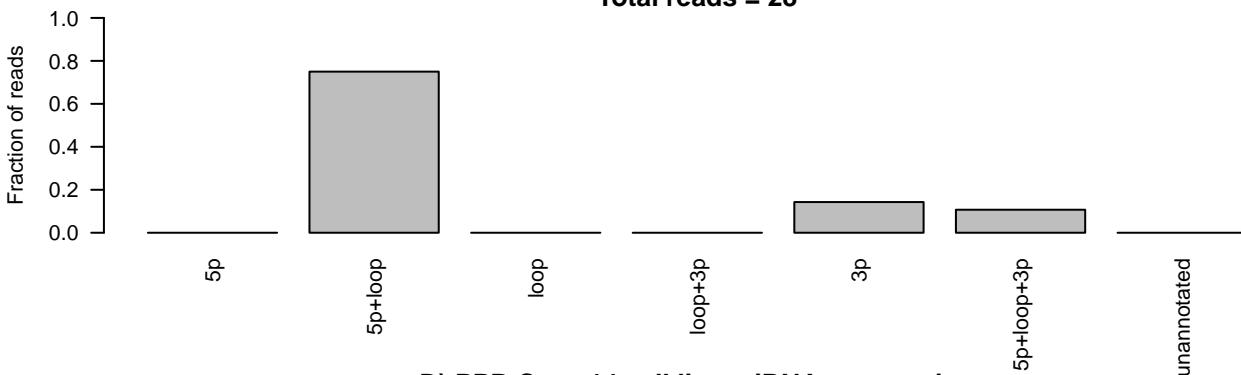

**D) PPB Case 14 cell line miRNA sequencing**  
ID=MI0000750\_1;accession\_number=MI0000750;Name=hsa-mir-26a-2  
Total reads = 1





**B) Normal fibroblast miRNA sequencing**  
ID=MI0000093\_1;accession\_number=MI0000093;Name=hsa-mir-92a-1  
Total reads = 2

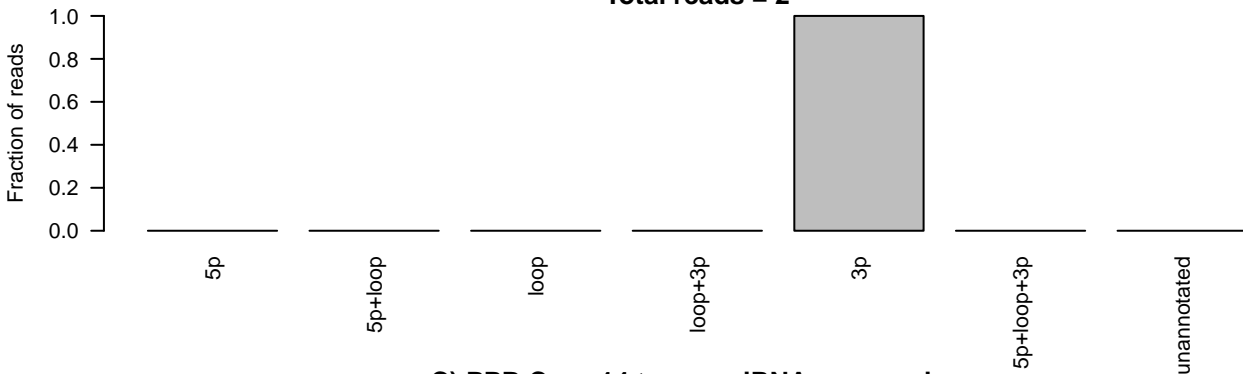

**C) PPB Case 14 tumor miRNA sequencing**  
ID=MI0000093\_1;accession\_number=MI0000093;Name=hsa-mir-92a-1  
Total reads = 4

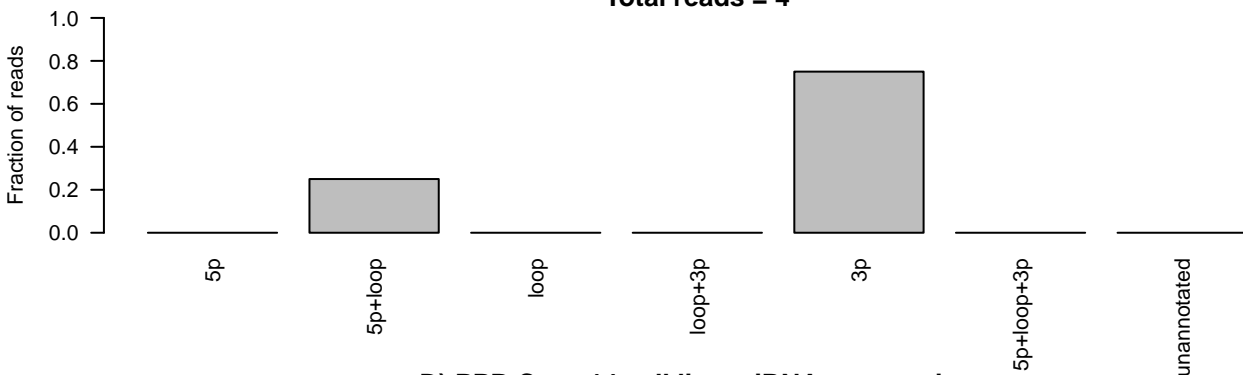

**D) PPB Case 14 cell line miRNA sequencing**  
ID=MI0000093\_1;accession\_number=MI0000093;Name=hsa-mir-92a-1  
Total reads = 27

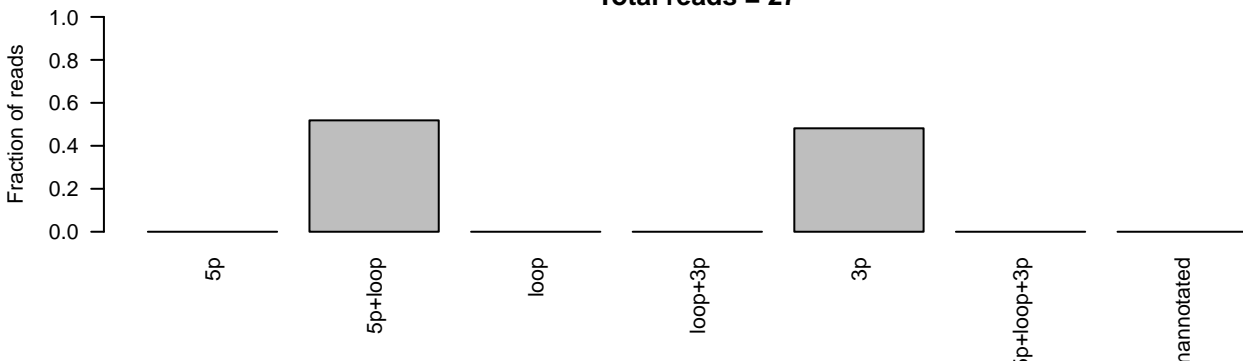

**B) Normal fibroblast miRNA sequencing**  
ID=MI0006656\_1;accession\_number=MI0006656;Name=hsa-mir-1197  
Total reads = 1

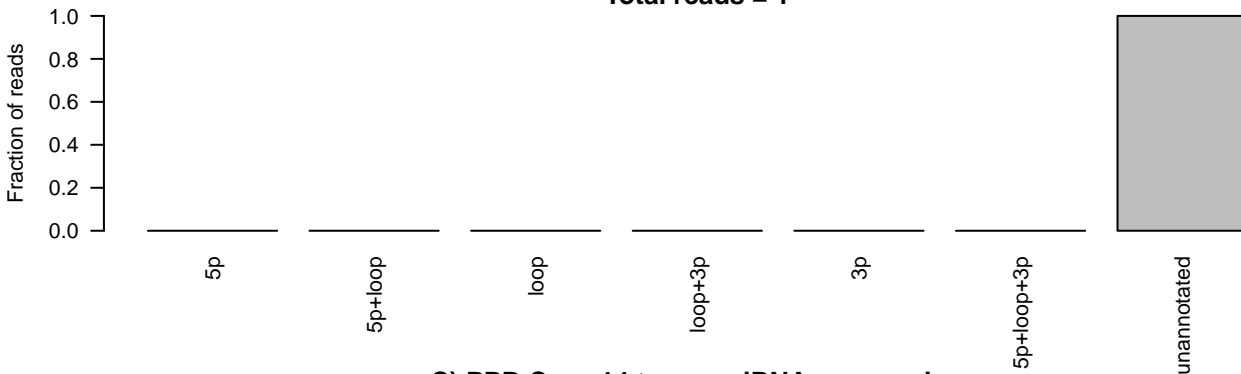

**C) PPB Case 14 tumor miRNA sequencing**  
ID=MI0006656\_1;accession\_number=MI0006656;Name=hsa-mir-1197  
Total reads = 16

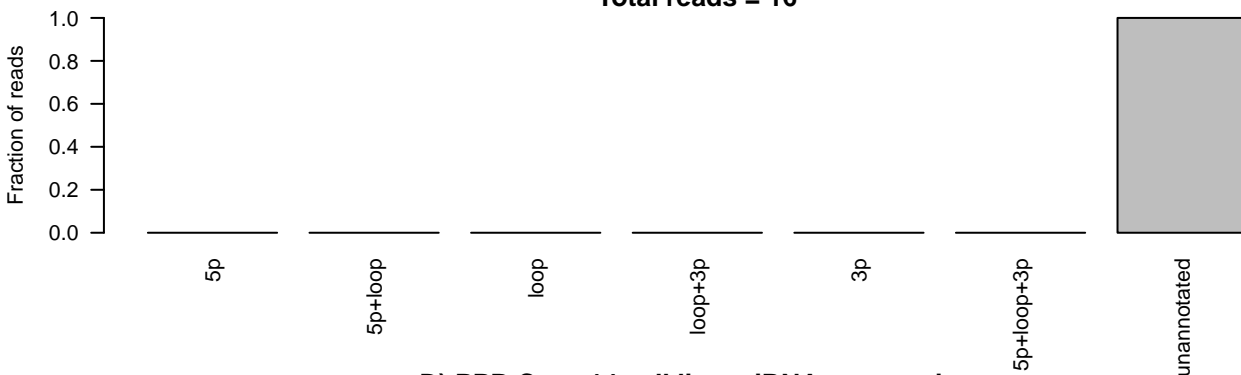

**D) PPB Case 14 cell line miRNA sequencing**  
ID=MI0006656\_1;accession\_number=MI0006656;Name=hsa-mir-1197  
Total reads = 0



**B) Normal fibroblast miRNA sequencing**  
ID=MI0001729\_1;accession\_number=MI0001729;Name=hsa-mir-451a  
Total reads = 2

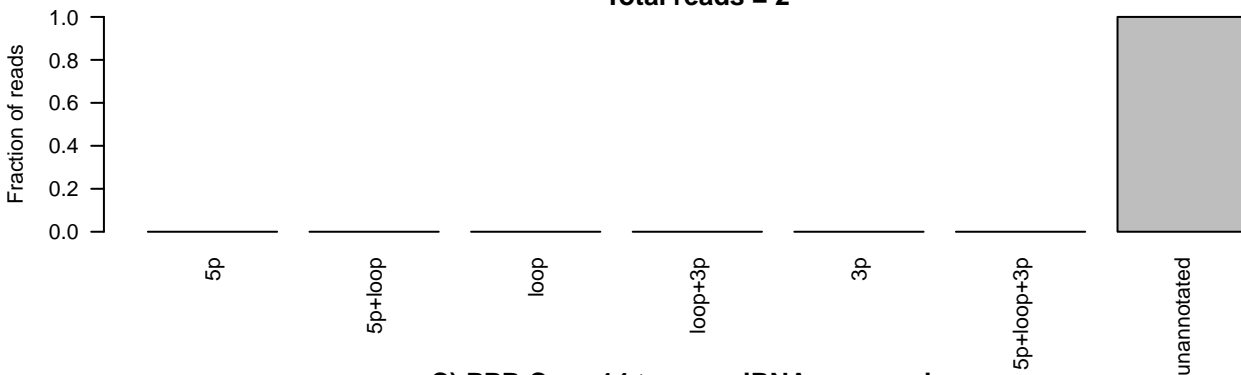

**C) PPB Case 14 tumor miRNA sequencing**  
ID=MI0001729\_1;accession\_number=MI0001729;Name=hsa-mir-451a  
Total reads = 516

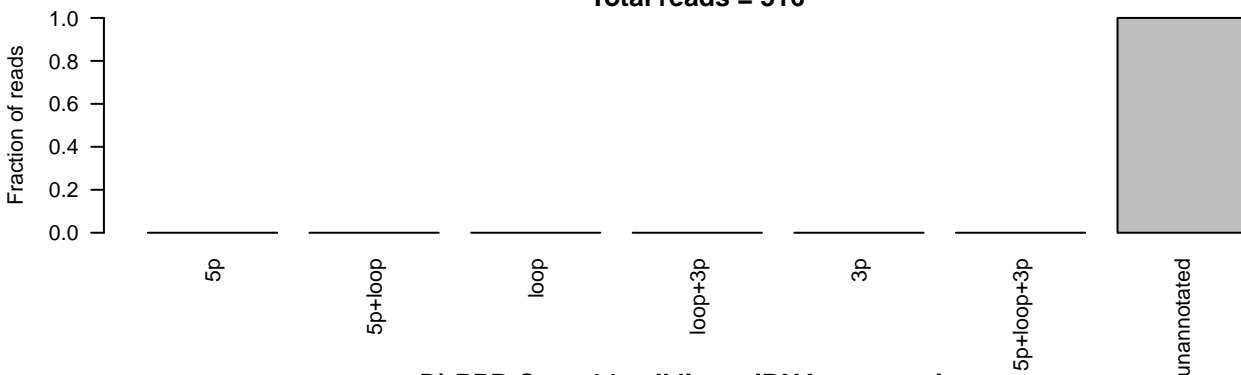

**D) PPB Case 14 cell line miRNA sequencing**  
ID=MI0001729\_1;accession\_number=MI0001729;Name=hsa-mir-451a  
Total reads = 3



**B) Normal fibroblast miRNA sequencing**  
ID=MI0017360\_1;accession\_number=MI0017360;Name=hsa-mir-451b  
Total reads = 0



**C) PPB Case 14 tumor miRNA sequencing**  
ID=MI0017360\_1;accession\_number=MI0017360;Name=hsa-mir-451b  
Total reads = 0



**D) PPB Case 14 cell line miRNA sequencing**  
ID=MI0017360\_1;accession\_number=MI0017360;Name=hsa-mir-451b  
Total reads = 0



**B) Normal fibroblast miRNA sequencing**  
ID=MI0017365\_1;accession\_number=MI0017365;Name=hsa-mir-4728  
Total reads = 2

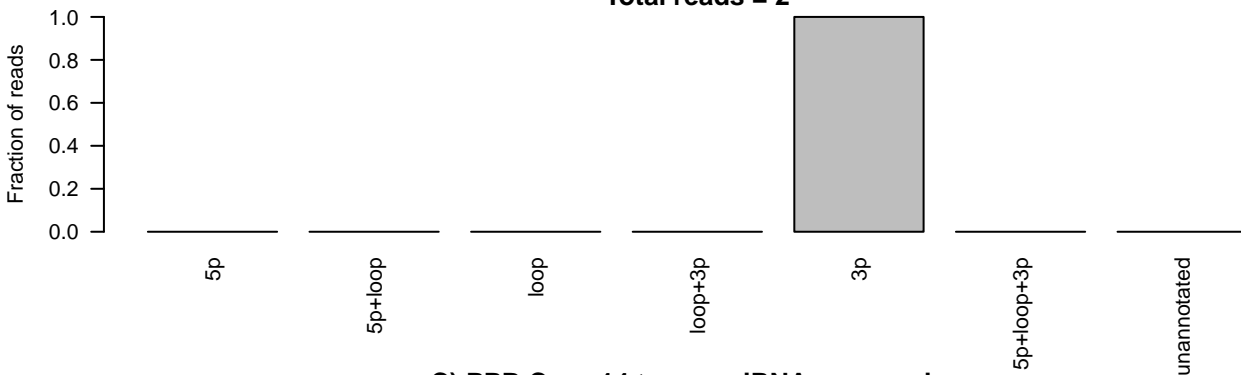

**C) PPB Case 14 tumor miRNA sequencing**  
ID=MI0017365\_1;accession\_number=MI0017365;Name=hsa-mir-4728  
Total reads = 0



**D) PPB Case 14 cell line miRNA sequencing**  
ID=MI0017365\_1;accession\_number=MI0017365;Name=hsa-mir-4728  
Total reads = 0



**B) Normal fibroblast miRNA sequencing**  
ID=MI0000266\_1;accession\_number=MI0000266;Name=hsa-mir-10a  
Total reads = 2

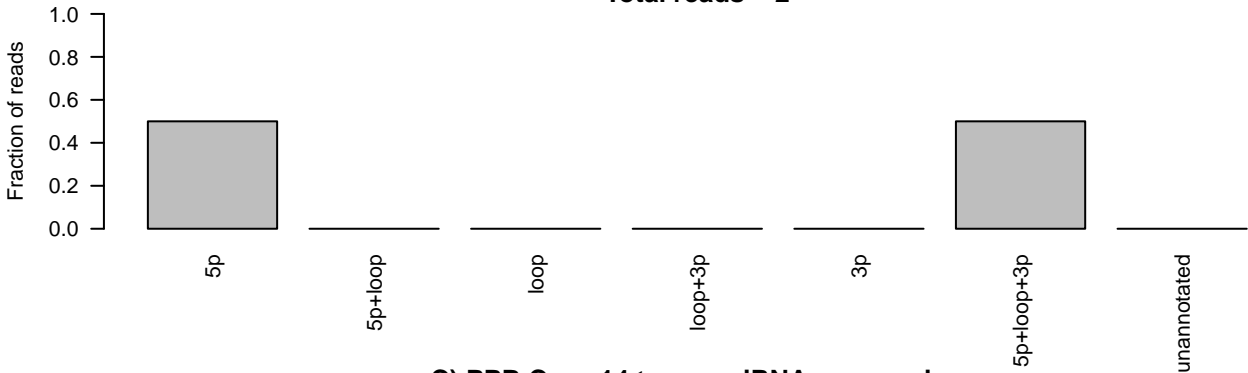

**C) PPB Case 14 tumor miRNA sequencing**  
ID=MI0000266\_1;accession\_number=MI0000266;Name=hsa-mir-10a  
Total reads = 0



**D) PPB Case 14 cell line miRNA sequencing**  
ID=MI0000266\_1;accession\_number=MI0000266;Name=hsa-mir-10a  
Total reads = 0



**B) Normal fibroblast miRNA sequencing**  
ID=MI0003834\_1;accession\_number=MI0003834;Name=hsa-mir-769  
Total reads = 2

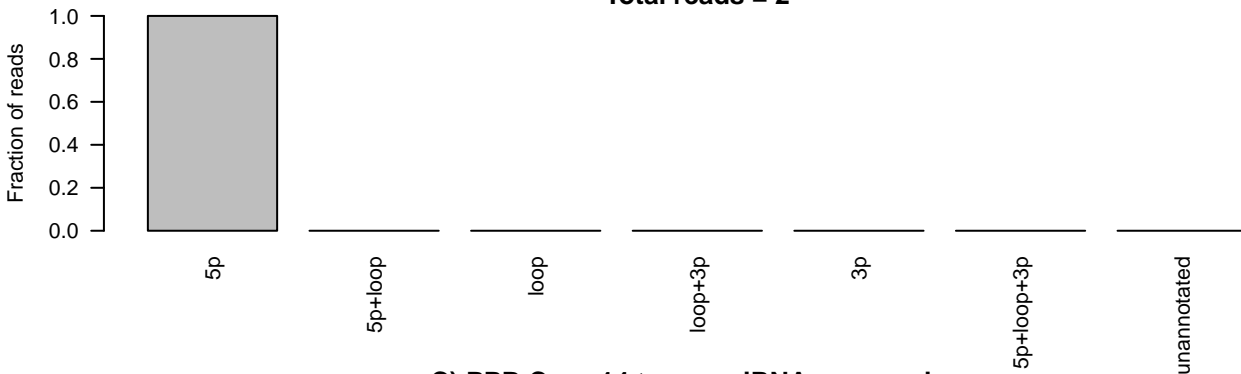

**C) PPB Case 14 tumor miRNA sequencing**  
ID=MI0003834\_1;accession\_number=MI0003834;Name=hsa-mir-769  
Total reads = 3

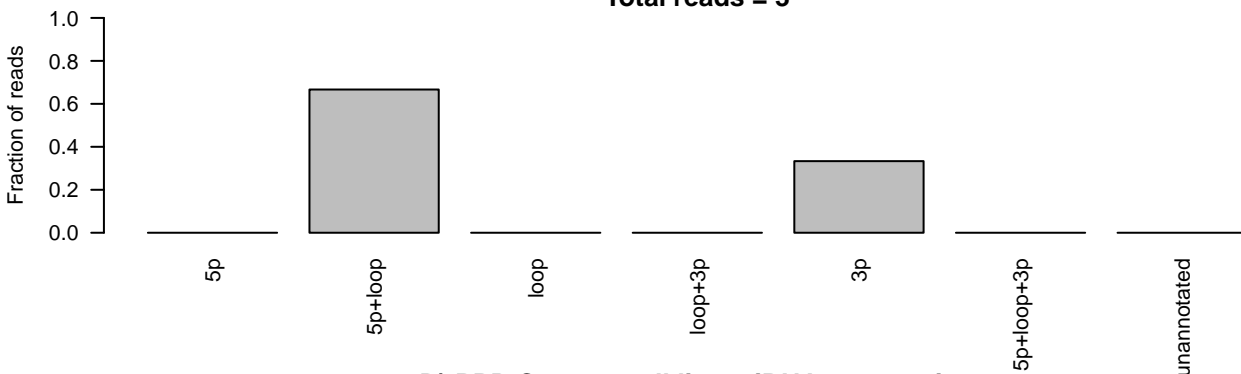

**D) PPB Case 14 cell line miRNA sequencing**  
ID=MI0003834\_1;accession\_number=MI0003834;Name=hsa-mir-769  
Total reads = 4

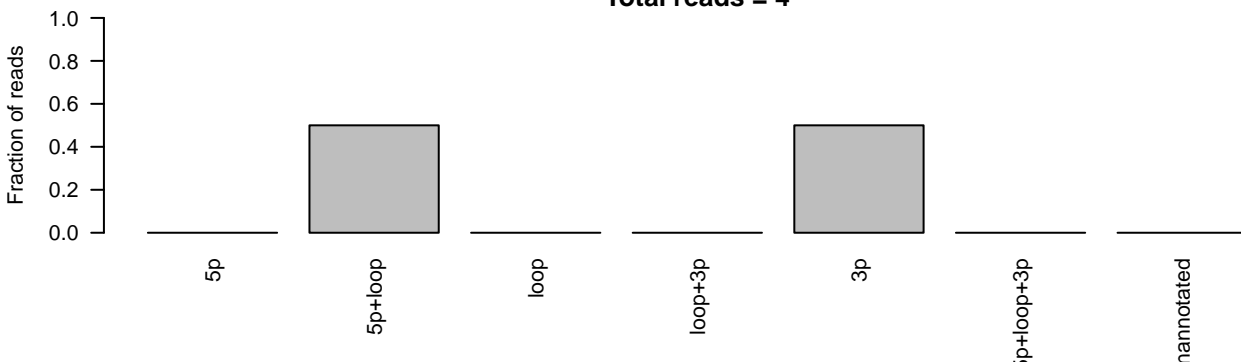

**B) Normal fibroblast miRNA sequencing**  
ID=MI0005763\_1;accession\_number=MI0005763;Name=hsa-mir-941-1  
Total reads = 2

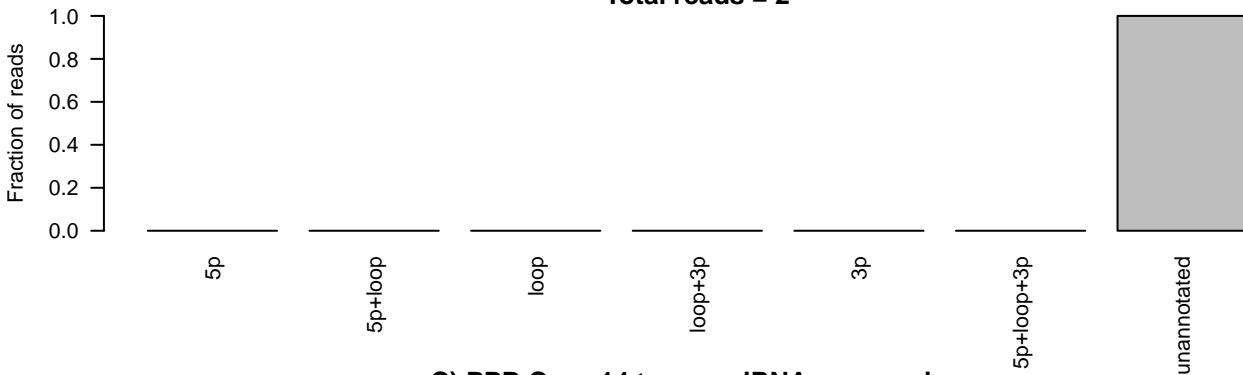

**C) PPB Case 14 tumor miRNA sequencing**  
ID=MI0005763\_1;accession\_number=MI0005763;Name=hsa-mir-941-1  
Total reads = 2

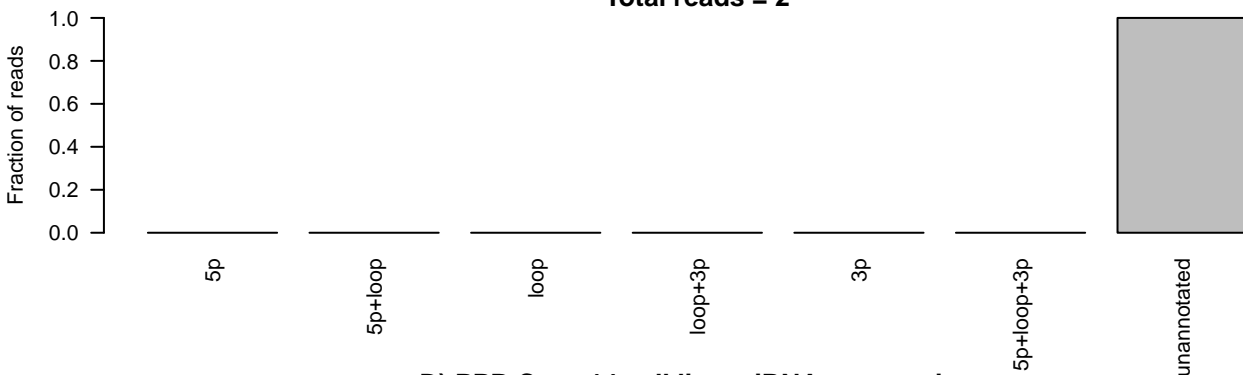

**D) PPB Case 14 cell line miRNA sequencing**  
ID=MI0005763\_1;accession\_number=MI0005763;Name=hsa-mir-941-1  
Total reads = 0





**B) Normal fibroblast miRNA sequencing**  
ID=MI0003583\_1;accession\_number=MI0003583;Name=hsa-mir-576  
Total reads = 2

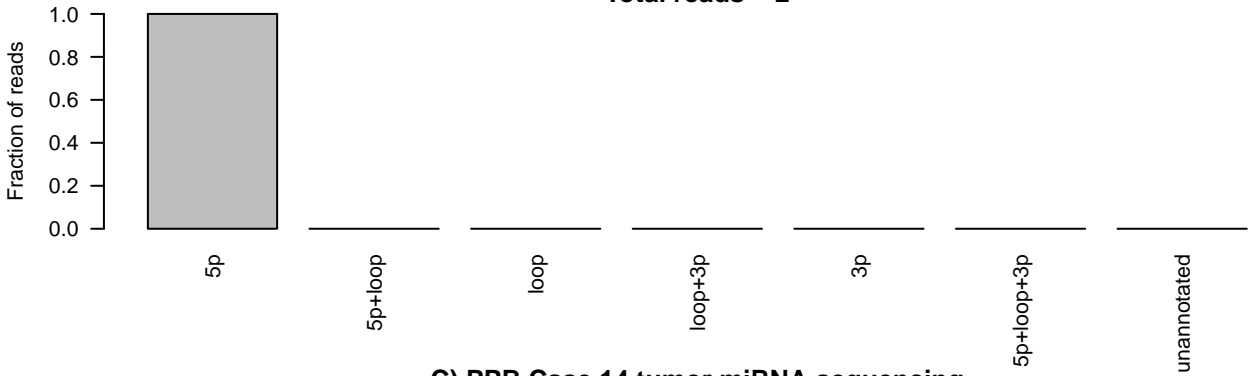

**C) PPB Case 14 tumor miRNA sequencing**  
ID=MI0003583\_1;accession\_number=MI0003583;Name=hsa-mir-576  
Total reads = 0

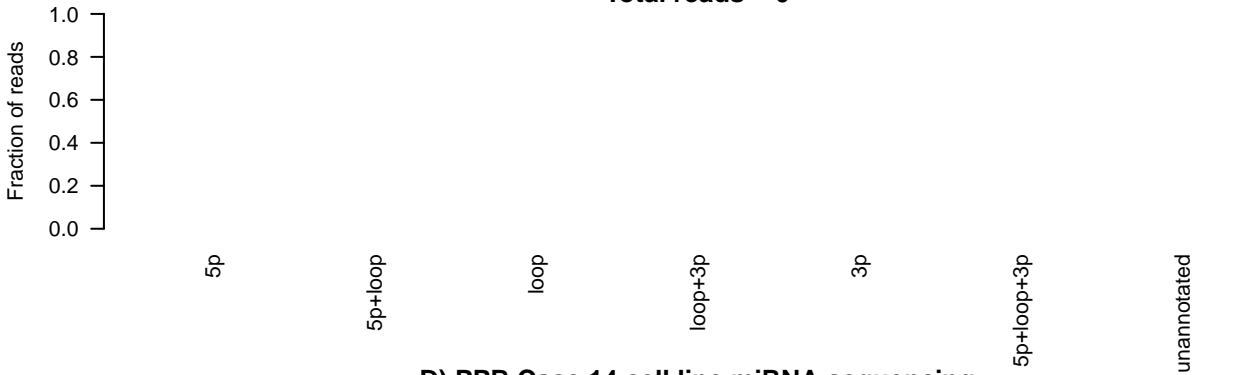

**D) PPB Case 14 cell line miRNA sequencing**  
ID=MI0003583\_1;accession\_number=MI0003583;Name=hsa-mir-576  
Total reads = 0



**B) Normal fibroblast miRNA sequencing**  
ID=MI0006319\_1;accession\_number=MI0006319;Name=hsa-mir-1229

Total reads = 2

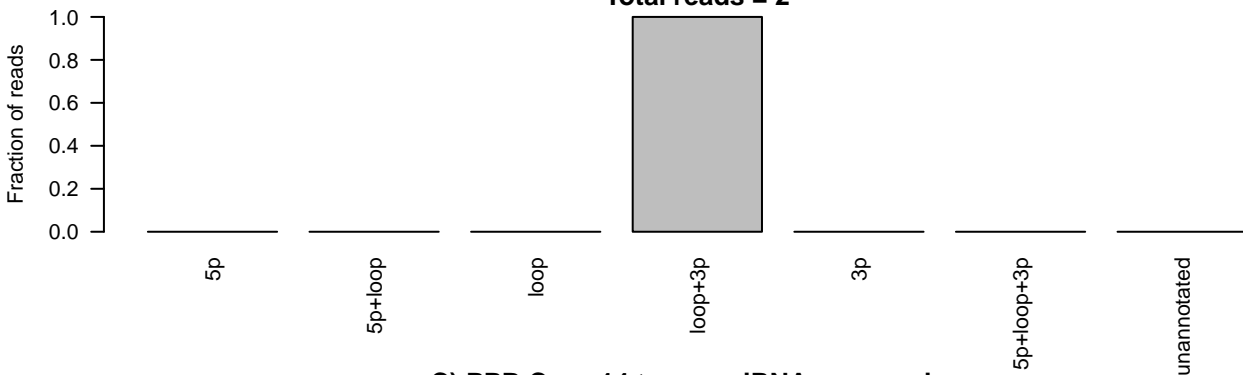

**C) PPB Case 14 tumor miRNA sequencing**  
ID=MI0006319\_1;accession\_number=MI0006319;Name=hsa-mir-1229

Total reads = 0



**D) PPB Case 14 cell line miRNA sequencing**  
ID=MI0006319\_1;accession\_number=MI0006319;Name=hsa-mir-1229

Total reads = 0



**B) Normal fibroblast miRNA sequencing**  
ID=MI0000090\_1;accession\_number=MI0000090;Name=hsa-mir-32  
Total reads = 2



**C) PPB Case 14 tumor miRNA sequencing**  
ID=MI0000090\_1;accession\_number=MI0000090;Name=hsa-mir-32  
Total reads = 2



**D) PPB Case 14 cell line miRNA sequencing**  
ID=MI0000090\_1;accession\_number=MI0000090;Name=hsa-mir-32  
Total reads = 0



**B) Normal fibroblast miRNA sequencing**  
ID=MI0003186\_1;accession\_number=MI0003186;Name=hsa-mir-502  
Total reads = 2

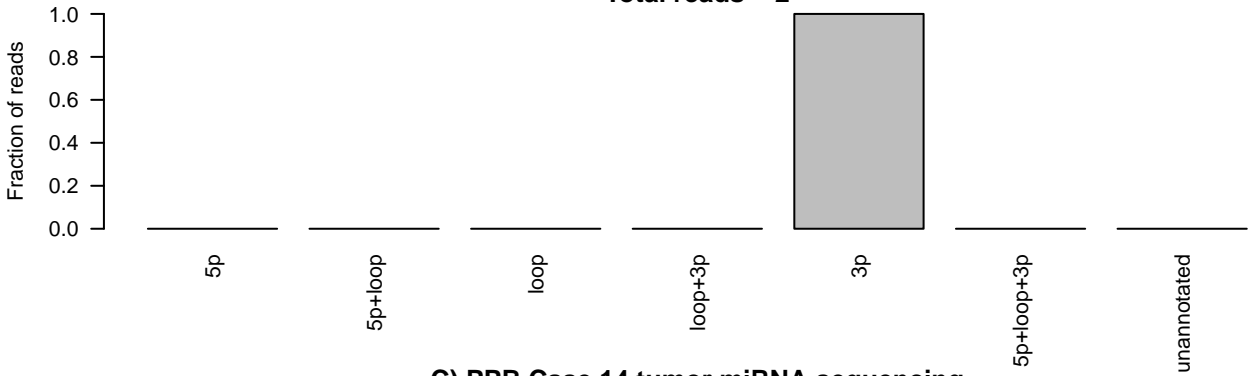

**C) PPB Case 14 tumor miRNA sequencing**  
ID=MI0003186\_1;accession\_number=MI0003186;Name=hsa-mir-502  
Total reads = 8

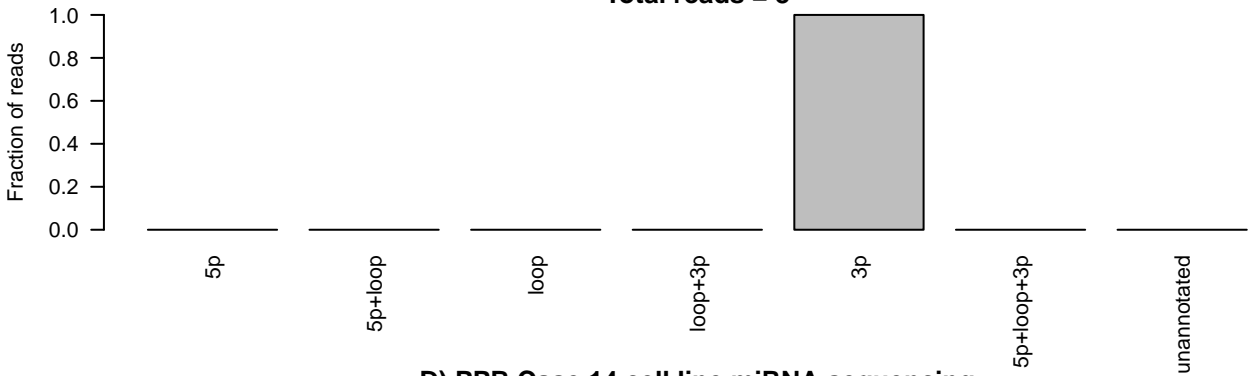

**D) PPB Case 14 cell line miRNA sequencing**  
ID=MI0003186\_1;accession\_number=MI0003186;Name=hsa-mir-502  
Total reads = 1

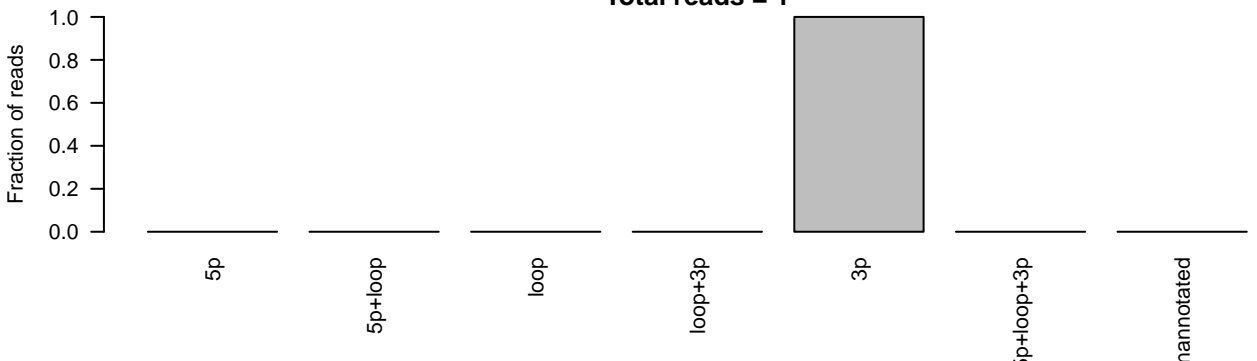

**B) Normal fibroblast miRNA sequencing**  
ID=MI0019134\_1;accession\_number=MI0019134;Name=hsa-mir-664b  
Total reads = 2

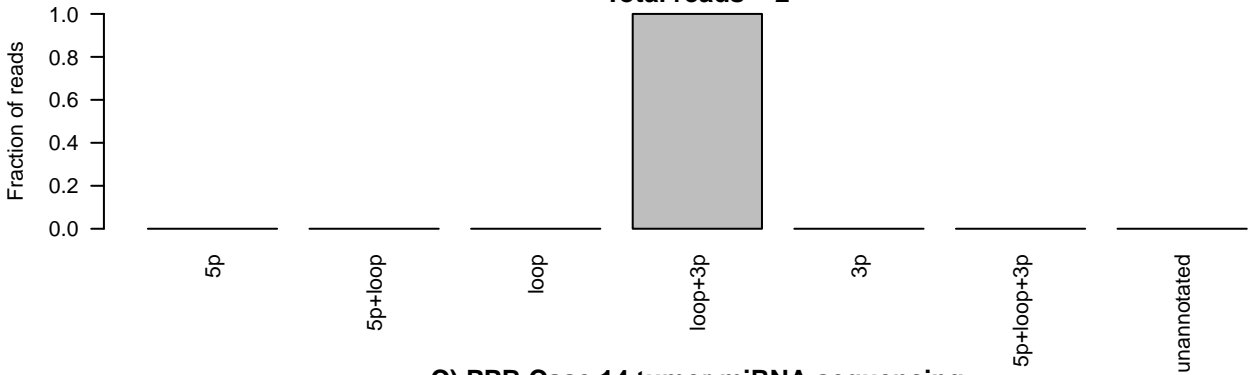

**C) PPB Case 14 tumor miRNA sequencing**  
ID=MI0019134\_1;accession\_number=MI0019134;Name=hsa-mir-664b  
Total reads = 0

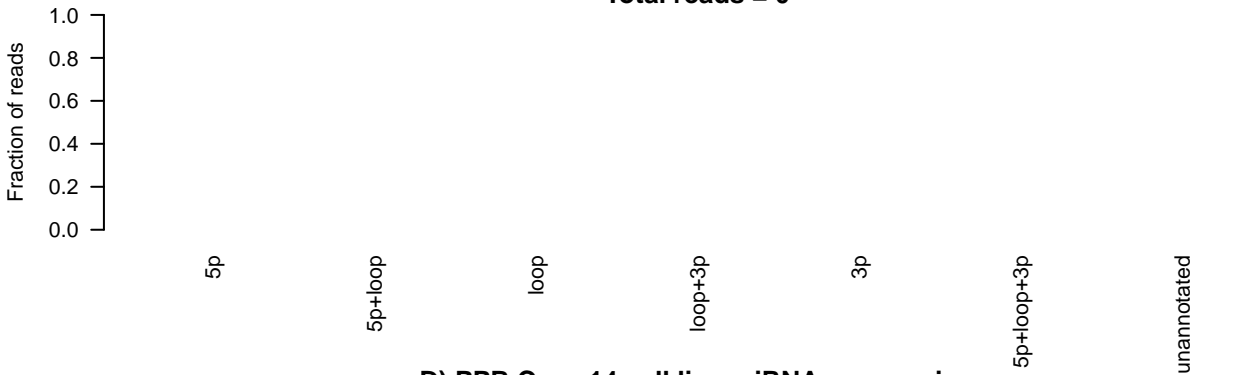

**D) PPB Case 14 cell line miRNA sequencing**  
ID=MI0019134\_1;accession\_number=MI0019134;Name=hsa-mir-664b  
Total reads = 0



**B) Normal fibroblast miRNA sequencing**  
ID=MI0000268\_1;accession\_number=MI0000268;Name=hsa-mir-34a  
Total reads = 1

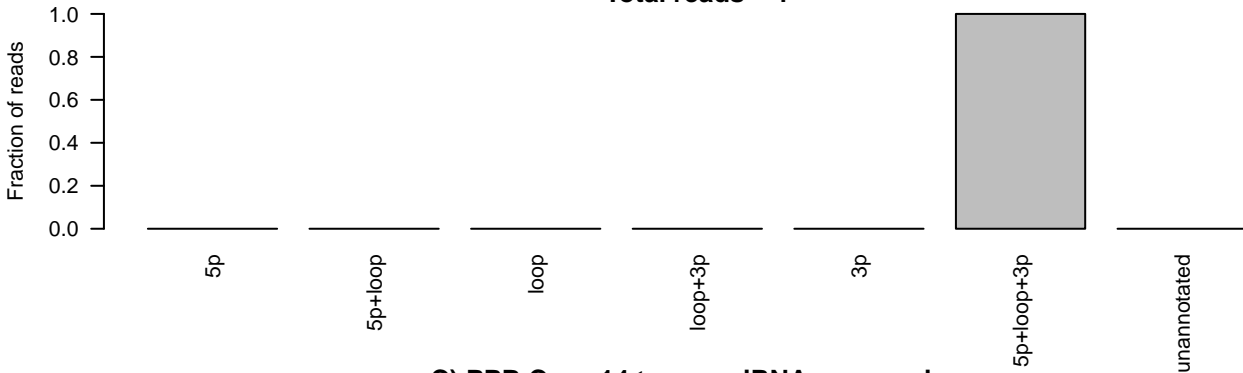

**C) PPB Case 14 tumor miRNA sequencing**  
ID=MI0000268\_1;accession\_number=MI0000268;Name=hsa-mir-34a  
Total reads = 0

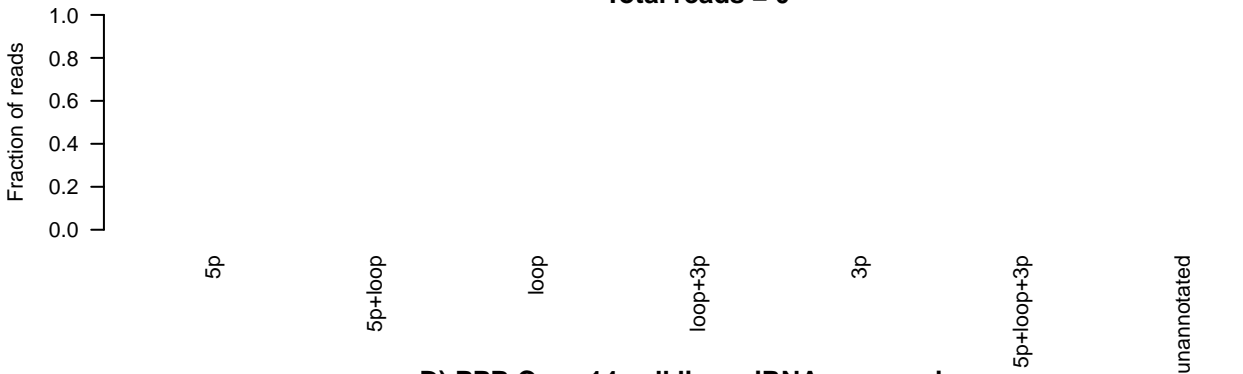

**D) PPB Case 14 cell line miRNA sequencing**  
ID=MI0000268\_1;accession\_number=MI0000268;Name=hsa-mir-34a  
Total reads = 1

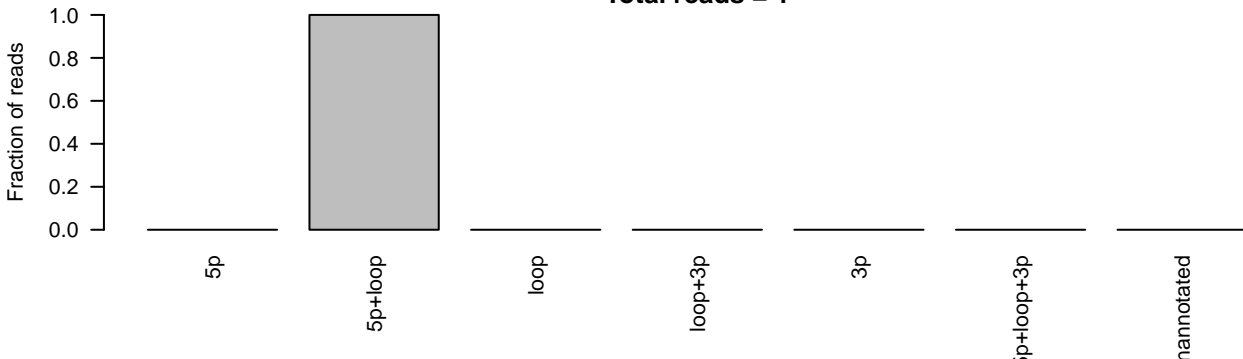

**B) Normal fibroblast miRNA sequencing**  
ID=MI0000239\_1;accession\_number=MI0000239;Name=hsa-mir-197  
Total reads = 1

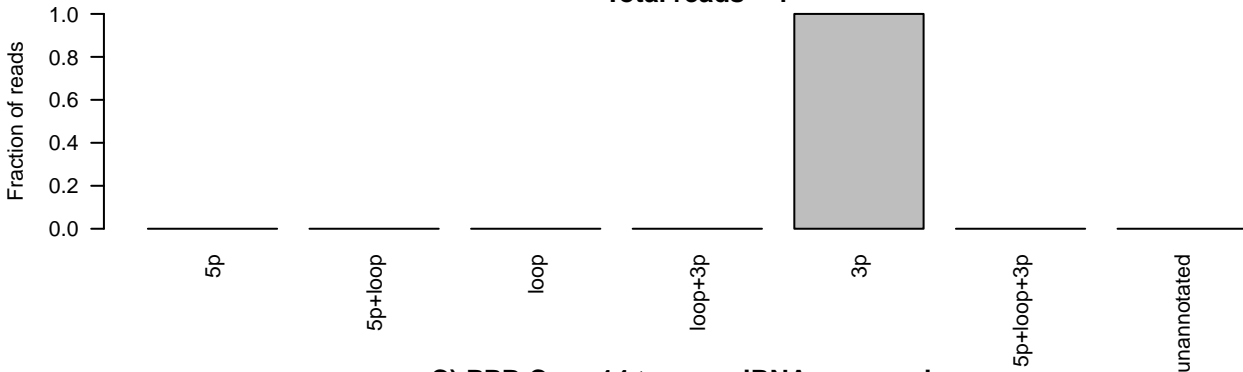

**C) PPB Case 14 tumor miRNA sequencing**  
ID=MI0000239\_1;accession\_number=MI0000239;Name=hsa-mir-197  
Total reads = 7

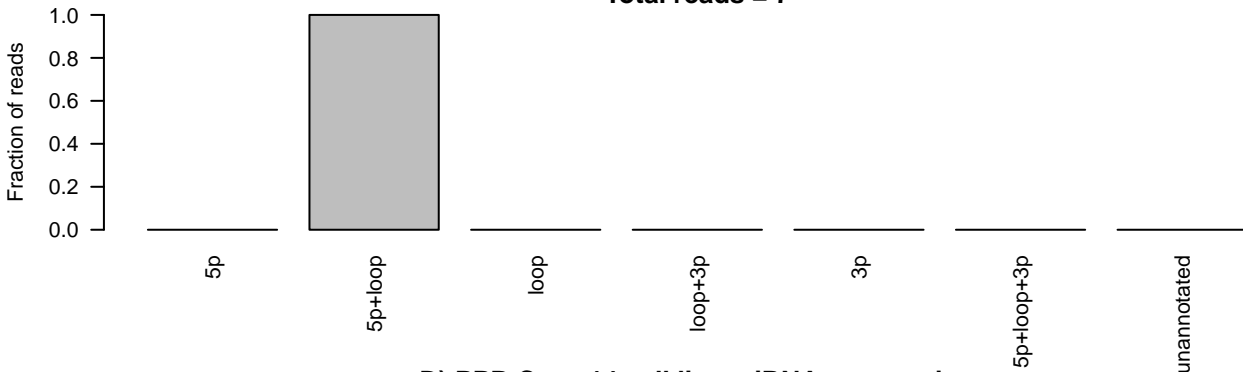

**D) PPB Case 14 cell line miRNA sequencing**  
ID=MI0000239\_1;accession\_number=MI0000239;Name=hsa-mir-197  
Total reads = 2



### B) Normal fibroblast miRNA sequencing

ID=MI0003776\_1;accession\_number=MI0003776;Name=hsa-mir-320b-1

Total reads = 1

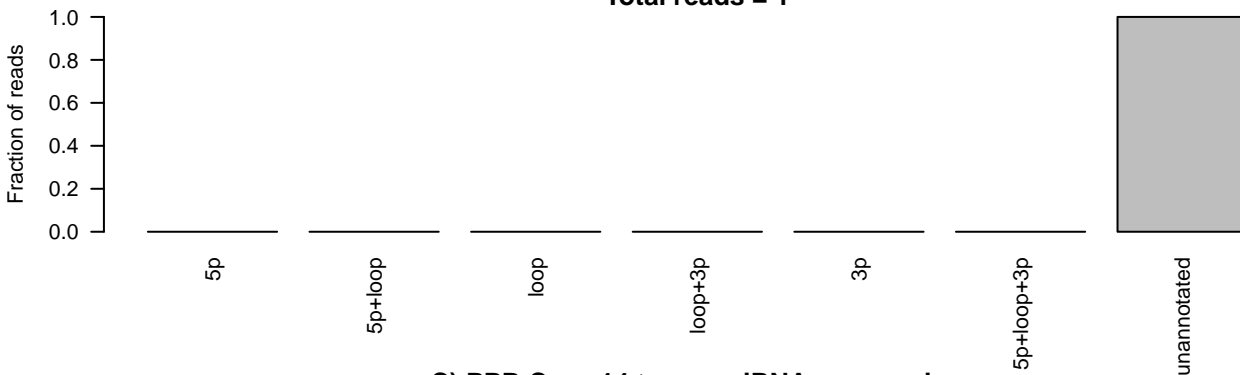

### C) PPB Case 14 tumor miRNA sequencing

ID=MI0003776\_1;accession\_number=MI0003776;Name=hsa-mir-320b-1

Total reads = 1

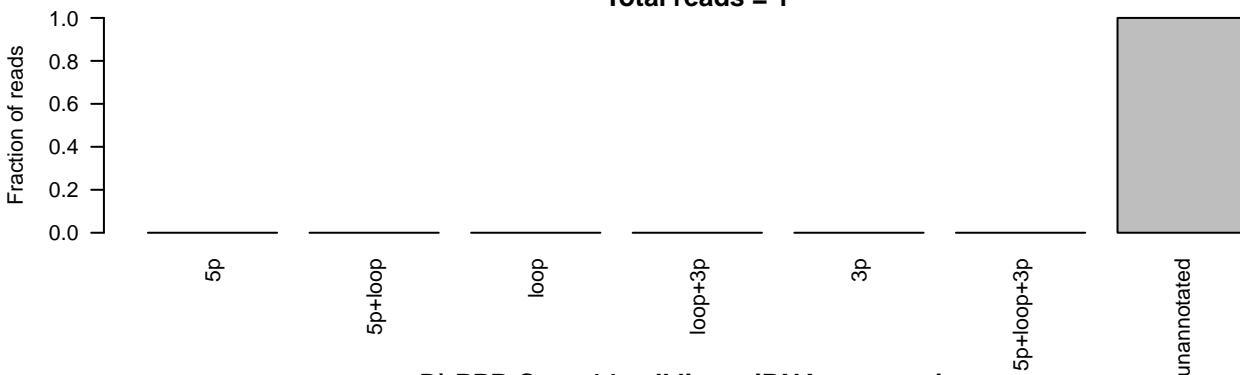

### D) PPB Case 14 cell line miRNA sequencing

ID=MI0003776\_1;accession\_number=MI0003776;Name=hsa-mir-320b-1

Total reads = 1

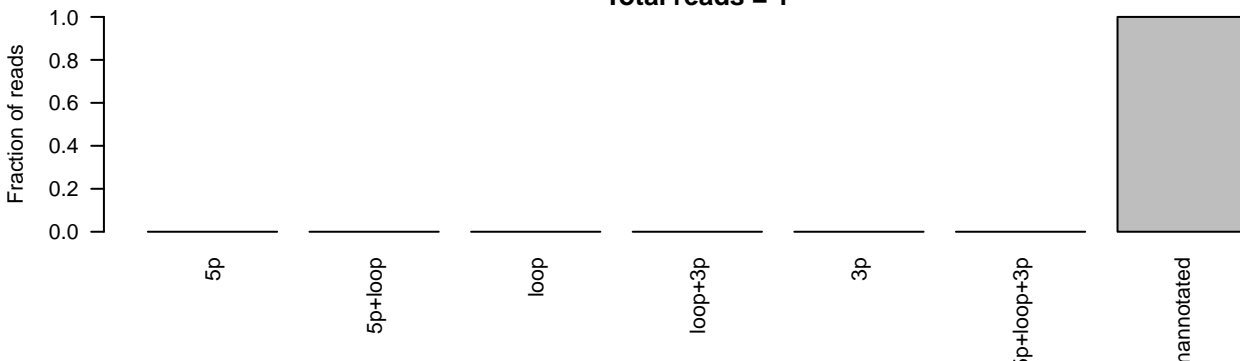



**B) Normal fibroblast miRNA sequencing**  
ID=MI0000488\_1;accession\_number=MI0000488;Name=hsa-mir-194-1  
Total reads = 1

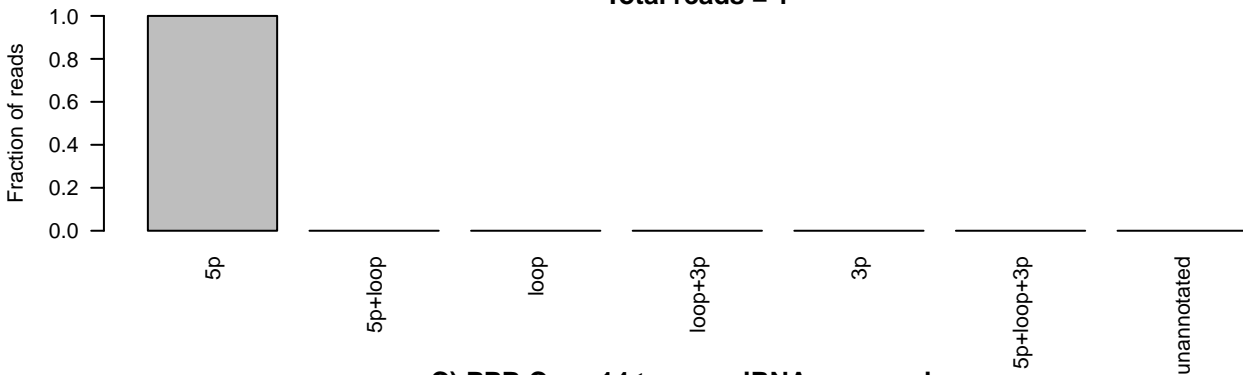

**C) PPB Case 14 tumor miRNA sequencing**  
ID=MI0000488\_1;accession\_number=MI0000488;Name=hsa-mir-194-1  
Total reads = 0



**D) PPB Case 14 cell line miRNA sequencing**  
ID=MI0000488\_1;accession\_number=MI0000488;Name=hsa-mir-194-1  
Total reads = 0



**B) Normal fibroblast miRNA sequencing**  
ID=MI0000114\_1;accession\_number=MI0000114;Name=hsa-mir-107  
Total reads = 1



**C) PPB Case 14 tumor miRNA sequencing**  
ID=MI0000114\_1;accession\_number=MI0000114;Name=hsa-mir-107  
Total reads = 2

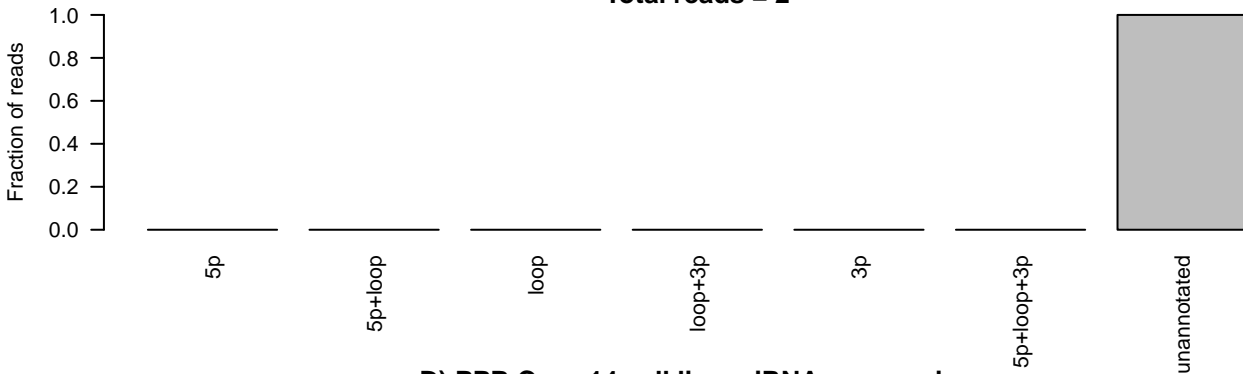

**D) PPB Case 14 cell line miRNA sequencing**  
ID=MI0000114\_1;accession\_number=MI0000114;Name=hsa-mir-107  
Total reads = 0



### B) Normal fibroblast miRNA sequencing

ID=MI0014186\_1;accession\_number=MI0014186;Name=hsa-mir-3158-1

Total reads = 1

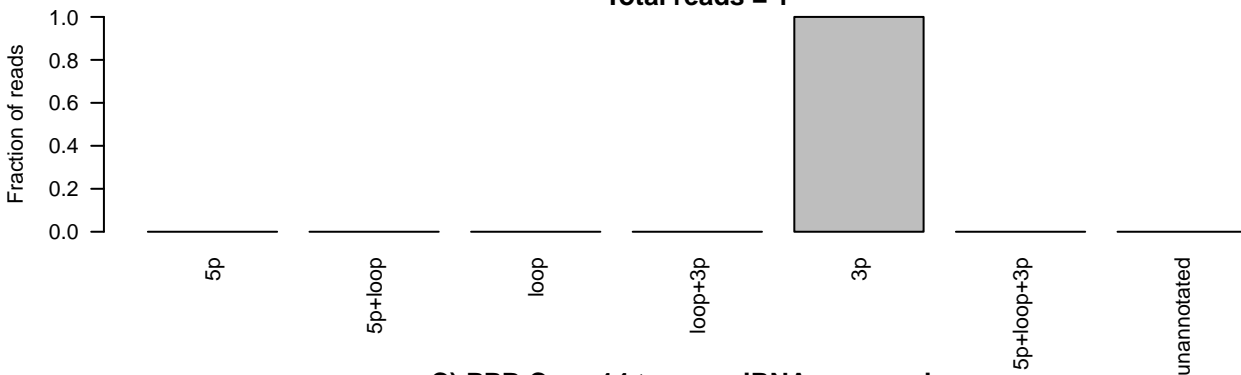

### C) PPB Case 14 tumor miRNA sequencing

ID=MI0014186\_1;accession\_number=MI0014186;Name=hsa-mir-3158-1

Total reads = 0



### D) PPB Case 14 cell line miRNA sequencing

ID=MI0014186\_1;accession\_number=MI0014186;Name=hsa-mir-3158-1

Total reads = 0



**B) Normal fibroblast miRNA sequencing**  
ID=MI0014187\_1;accession\_number=MI0014187;Name=hsa-mir-3158-2  
Total reads = 1

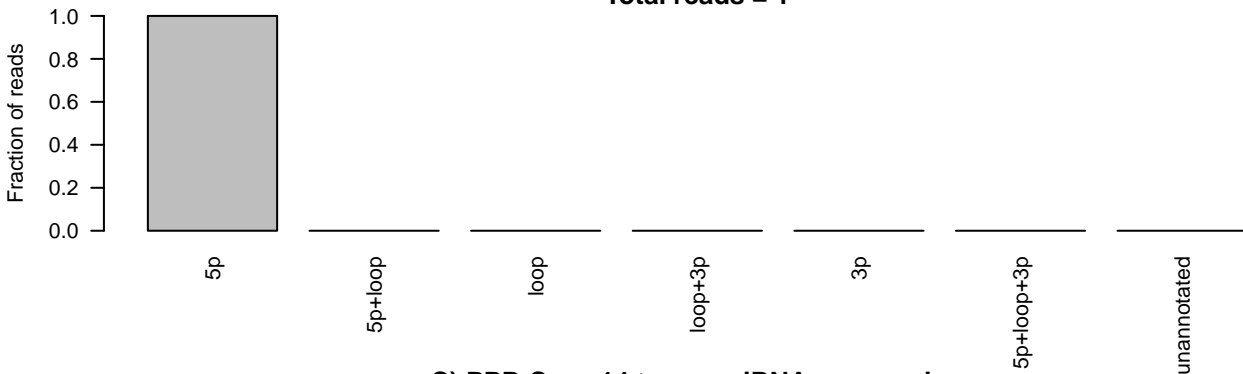

**C) PPB Case 14 tumor miRNA sequencing**  
ID=MI0014187\_1;accession\_number=MI0014187;Name=hsa-mir-3158-2  
Total reads = 0



**D) PPB Case 14 cell line miRNA sequencing**  
ID=MI0014187\_1;accession\_number=MI0014187;Name=hsa-mir-3158-2  
Total reads = 0



**B) Normal fibroblast miRNA sequencing**  
ID=MI0000473\_1;accession\_number=MI0000473;Name=hsa-mir-129-2  
Total reads = 1

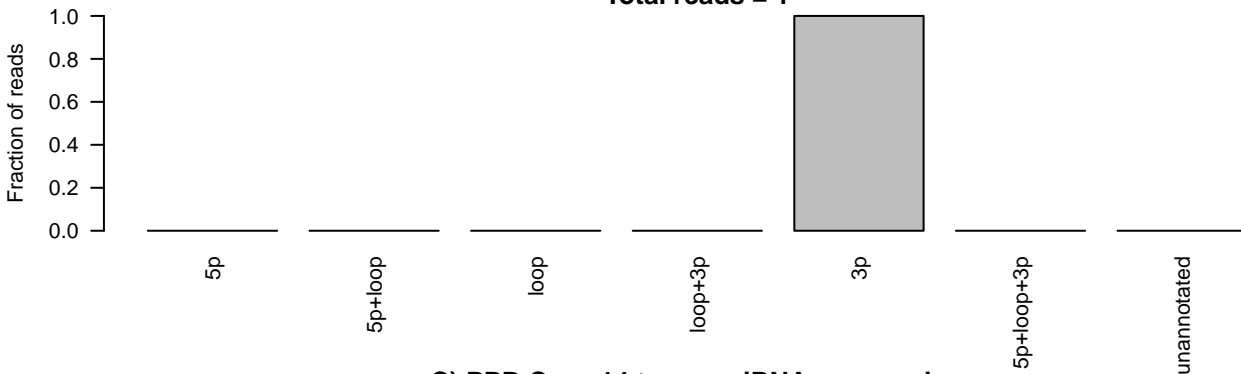

**C) PPB Case 14 tumor miRNA sequencing**  
ID=MI0000473\_1;accession\_number=MI0000473;Name=hsa-mir-129-2  
Total reads = 0



**D) PPB Case 14 cell line miRNA sequencing**  
ID=MI0000473\_1;accession\_number=MI0000473;Name=hsa-mir-129-2  
Total reads = 0



**B) Normal fibroblast miRNA sequencing**  
ID=MI0016849\_1;accession\_number=MI0016849;Name=hsa-mir-4488  
Total reads = 0

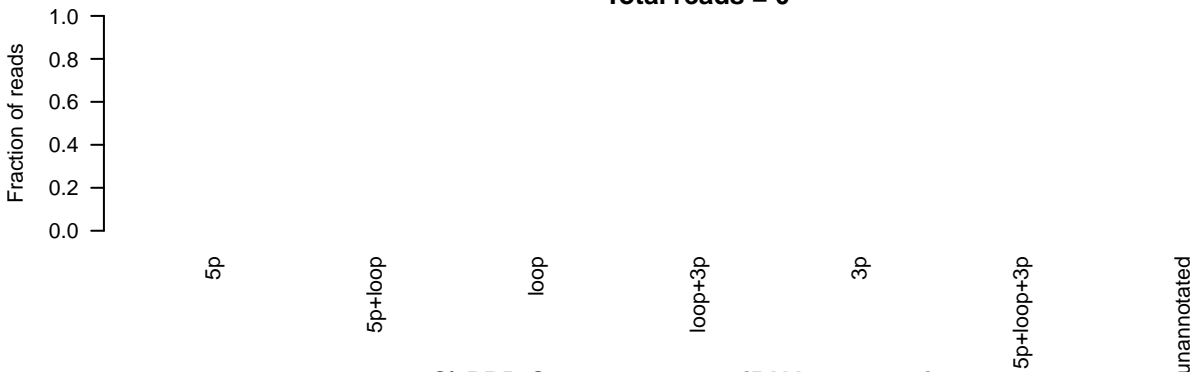

**C) PPB Case 14 tumor miRNA sequencing**  
ID=MI0016849\_1;accession\_number=MI0016849;Name=hsa-mir-4488  
Total reads = 0

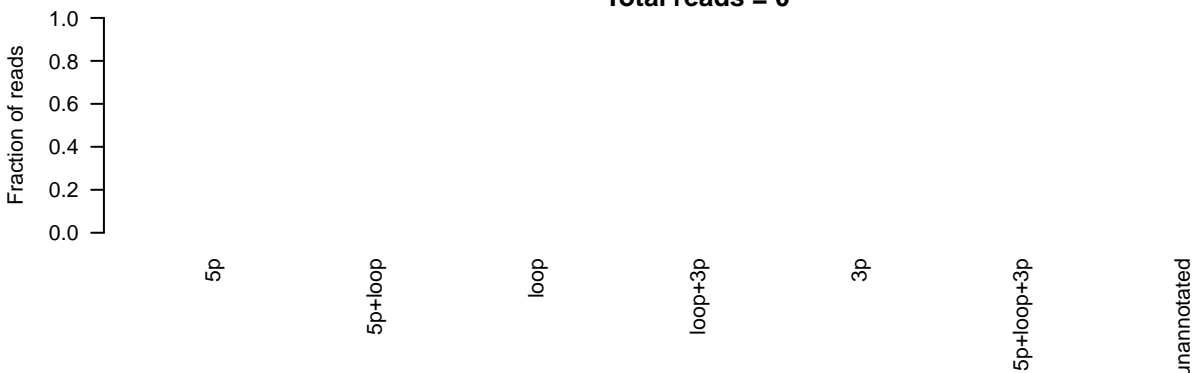

**D) PPB Case 14 cell line miRNA sequencing**  
ID=MI0016849\_1;accession\_number=MI0016849;Name=hsa-mir-4488  
Total reads = 0



**B) Normal fibroblast miRNA sequencing**  
ID=MI0000732\_1;accession\_number=MI0000732;Name=hsa-mir-194-2  
Total reads = 1

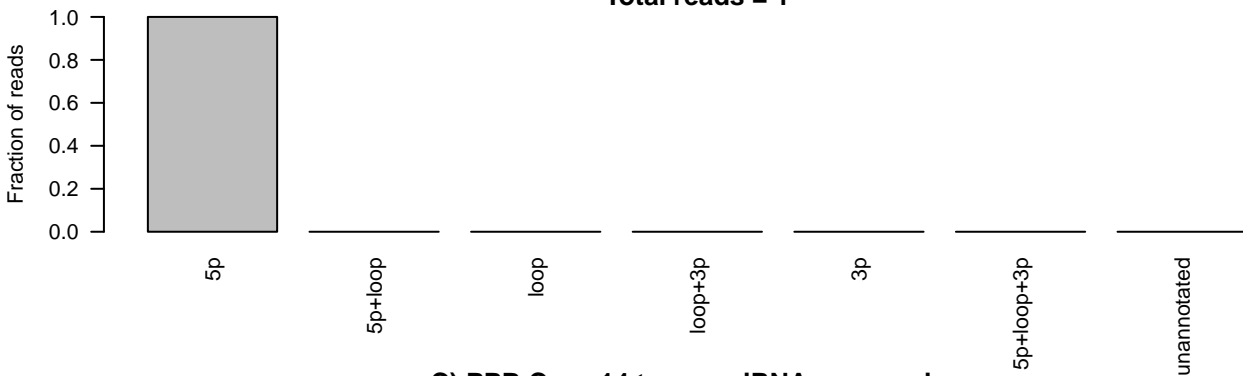

**C) PPB Case 14 tumor miRNA sequencing**  
ID=MI0000732\_1;accession\_number=MI0000732;Name=hsa-mir-194-2  
Total reads = 1

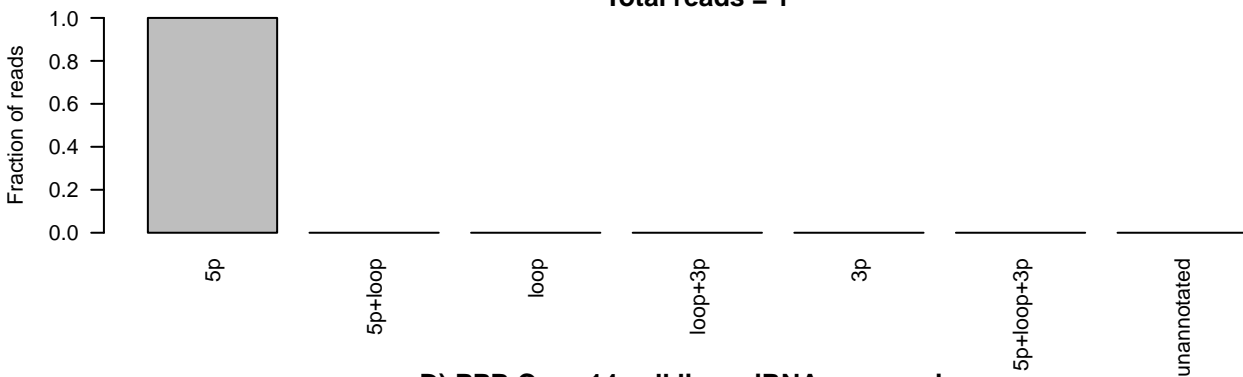

**D) PPB Case 14 cell line miRNA sequencing**  
ID=MI0000732\_1;accession\_number=MI0000732;Name=hsa-mir-194-2  
Total reads = 0



**B) Normal fibroblast miRNA sequencing**  
ID=MI0000808\_1;accession\_number=MI0000808;Name=hsa-mir-326  
Total reads = 1



**C) PPB Case 14 tumor miRNA sequencing**  
ID=MI0000808\_1;accession\_number=MI0000808;Name=hsa-mir-326  
Total reads = 22

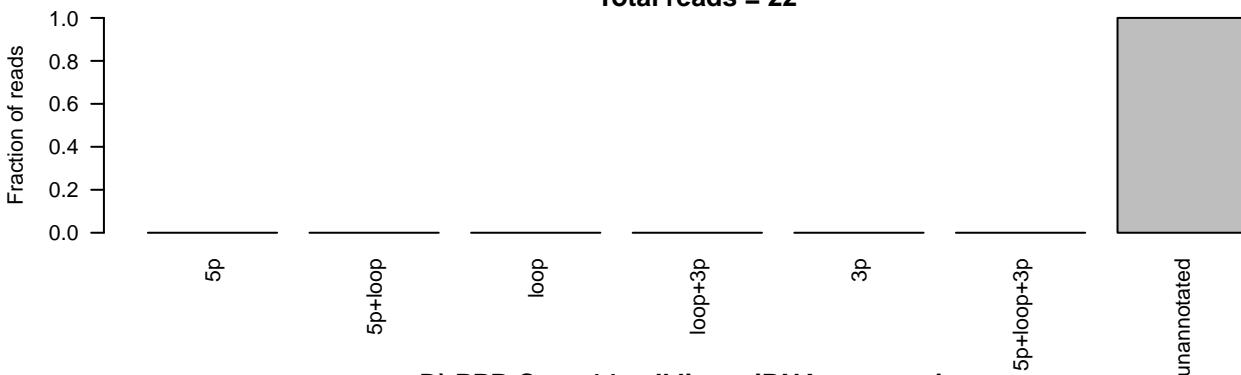

**D) PPB Case 14 cell line miRNA sequencing**  
ID=MI0000808\_1;accession\_number=MI0000808;Name=hsa-mir-326  
Total reads = 17

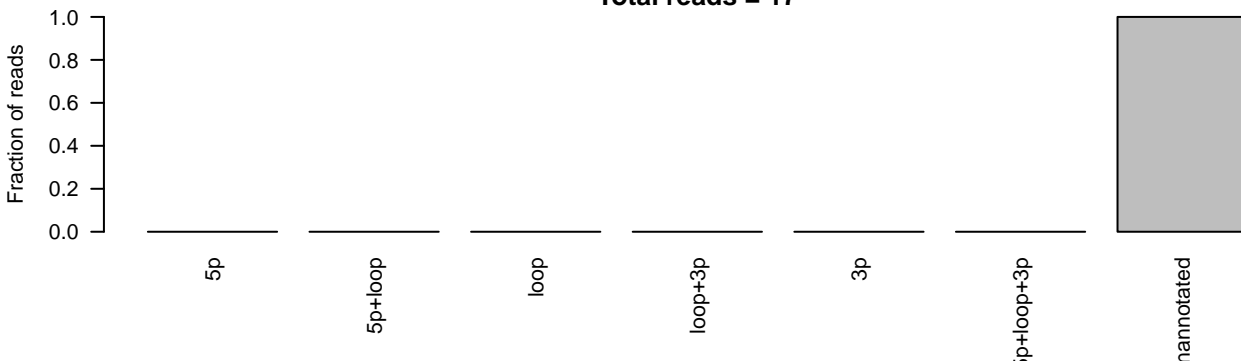



**B) Normal fibroblast miRNA sequencing**  
ID=MI0006353\_1;accession\_number=MI0006353;Name=hsa-mir-1291  
Total reads = 0



**C) PPB Case 14 tumor miRNA sequencing**  
ID=MI0006353\_1;accession\_number=MI0006353;Name=hsa-mir-1291  
Total reads = 0



**D) PPB Case 14 cell line miRNA sequencing**  
ID=MI0006353\_1;accession\_number=MI0006353;Name=hsa-mir-1291  
Total reads = 0



**B) Normal fibroblast miRNA sequencing**  
ID=MI0016003\_1;accession\_number=MI0016003;Name=hsa-mir-3613  
Total reads = 1

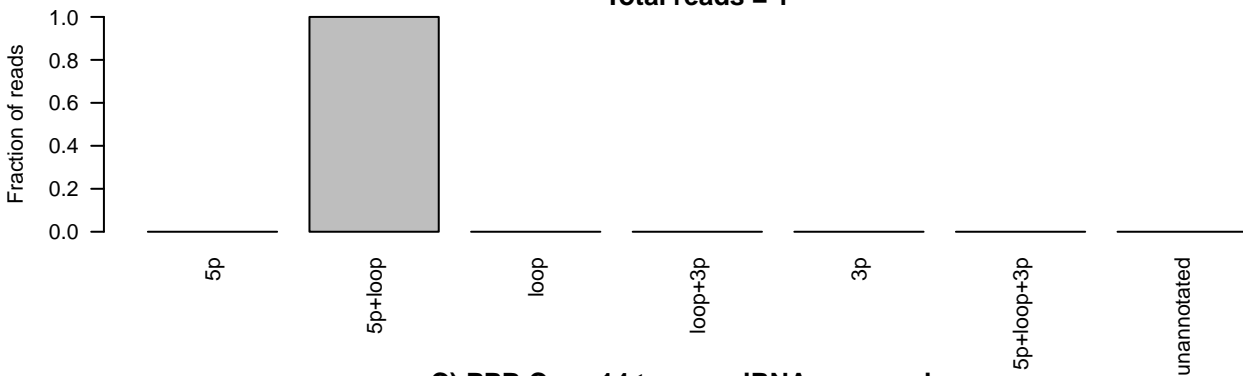

**C) PPB Case 14 tumor miRNA sequencing**  
ID=MI0016003\_1;accession\_number=MI0016003;Name=hsa-mir-3613  
Total reads = 24

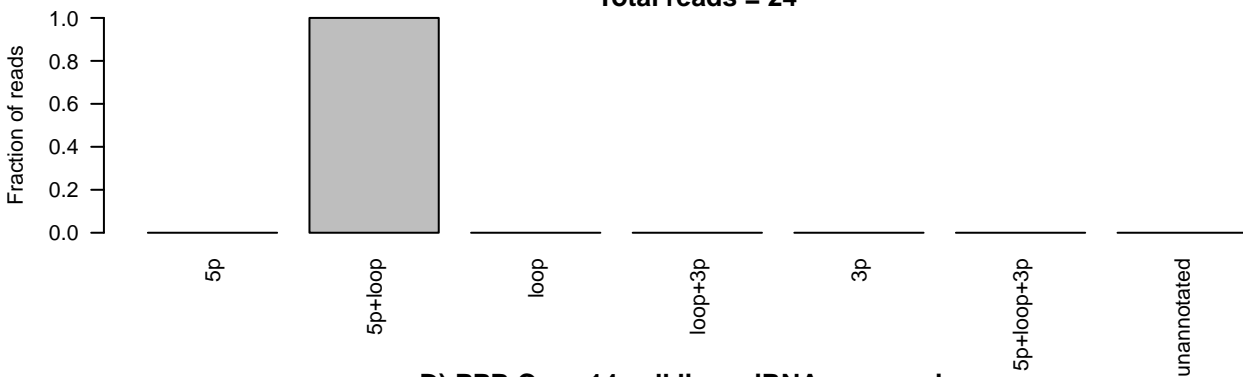

**D) PPB Case 14 cell line miRNA sequencing**  
ID=MI0016003\_1;accession\_number=MI0016003;Name=hsa-mir-3613  
Total reads = 0



**B) Normal fibroblast miRNA sequencing**  
ID=MI0000072\_1;accession\_number=MI0000072;Name=hsa-mir-18a  
Total reads = 1

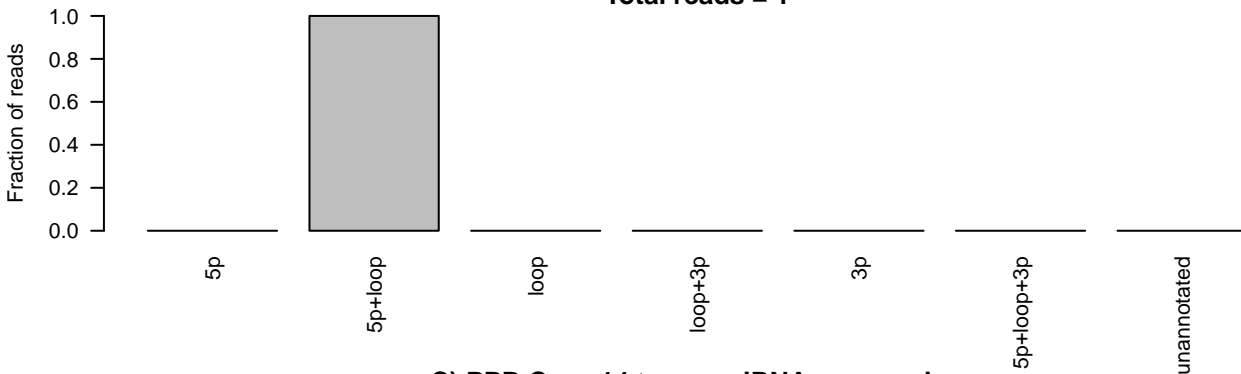

**C) PPB Case 14 tumor miRNA sequencing**  
ID=MI0000072\_1;accession\_number=MI0000072;Name=hsa-mir-18a  
Total reads = 2

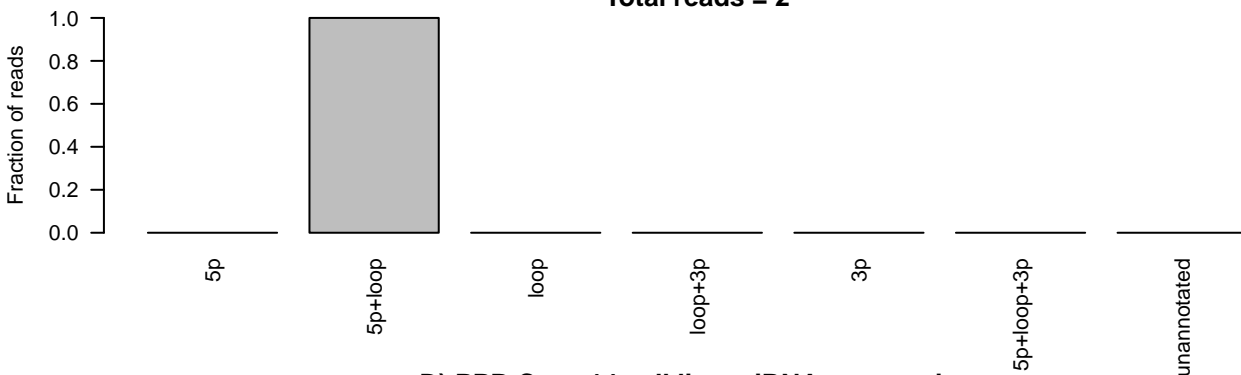

**D) PPB Case 14 cell line miRNA sequencing**  
ID=MI0000072\_1;accession\_number=MI0000072;Name=hsa-mir-18a  
Total reads = 0



**B) Normal fibroblast miRNA sequencing**  
ID=MI0005118\_1;accession\_number=MI0005118;Name=hsa-mir-770  
Total reads = 1

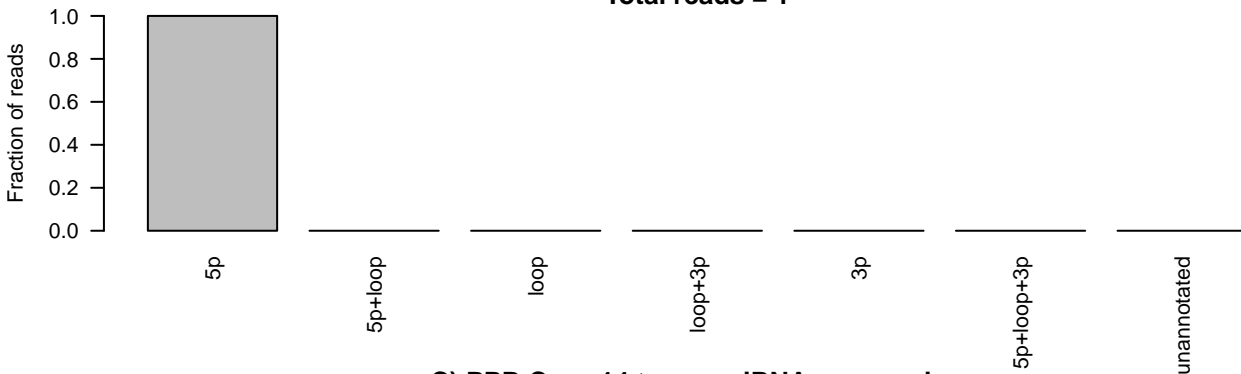

**C) PPB Case 14 tumor miRNA sequencing**  
ID=MI0005118\_1;accession\_number=MI0005118;Name=hsa-mir-770  
Total reads = 0



**D) PPB Case 14 cell line miRNA sequencing**  
ID=MI0005118\_1;accession\_number=MI0005118;Name=hsa-mir-770  
Total reads = 0



**B) Normal fibroblast miRNA sequencing**  
ID=MI0001725\_1;accession\_number=MI0001725;Name=hsa-mir-329-1  
Total reads = 1



**C) PPB Case 14 tumor miRNA sequencing**  
ID=MI0001725\_1;accession\_number=MI0001725;Name=hsa-mir-329-1  
Total reads = 7

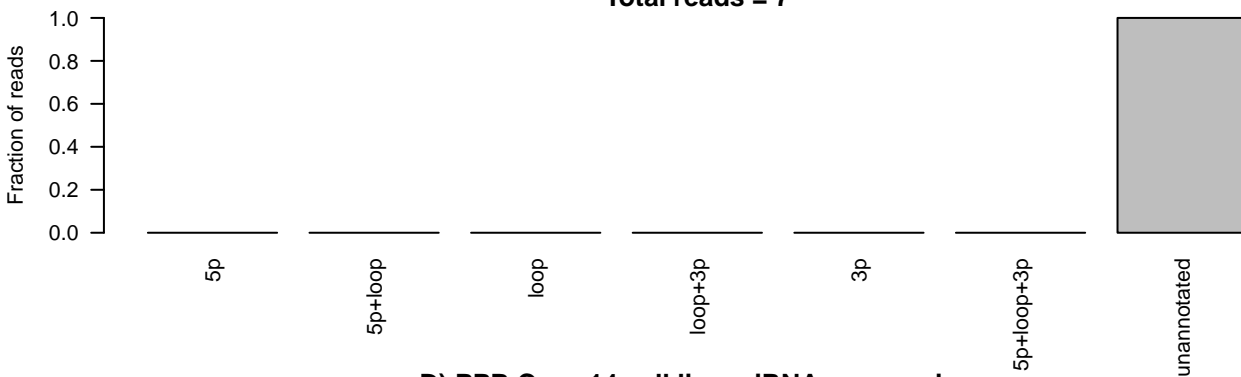

**D) PPB Case 14 cell line miRNA sequencing**  
ID=MI0001725\_1;accession\_number=MI0001725;Name=hsa-mir-329-1  
Total reads = 2



**B) Normal fibroblast miRNA sequencing**  
ID=MI0000776\_1;accession\_number=MI0000776;Name=hsa-mir-376c  
Total reads = 1

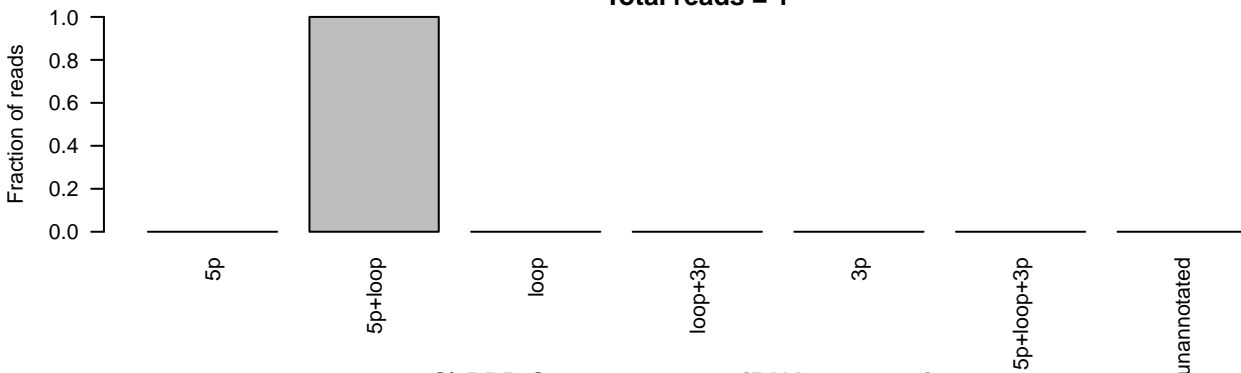

**C) PPB Case 14 tumor miRNA sequencing**  
ID=MI0000776\_1;accession\_number=MI0000776;Name=hsa-mir-376c  
Total reads = 42

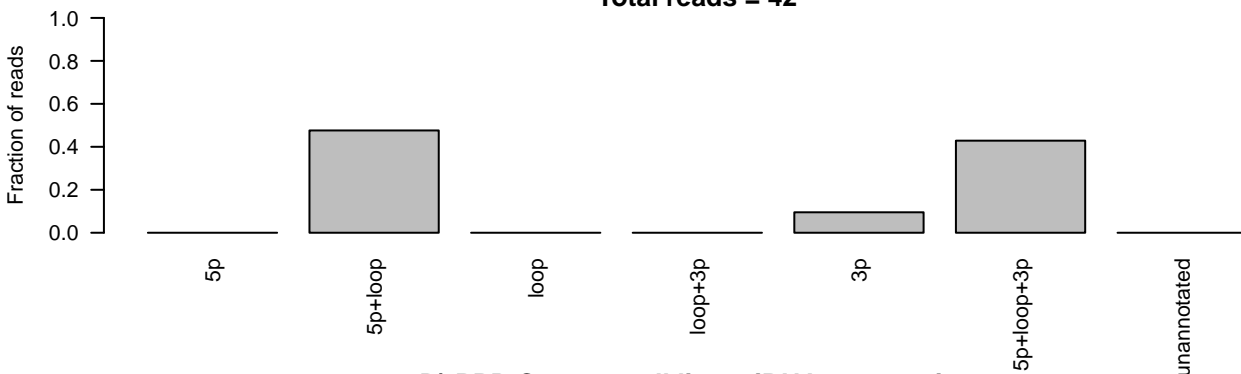

**D) PPB Case 14 cell line miRNA sequencing**  
ID=MI0000776\_1;accession\_number=MI0000776;Name=hsa-mir-376c  
Total reads = 6

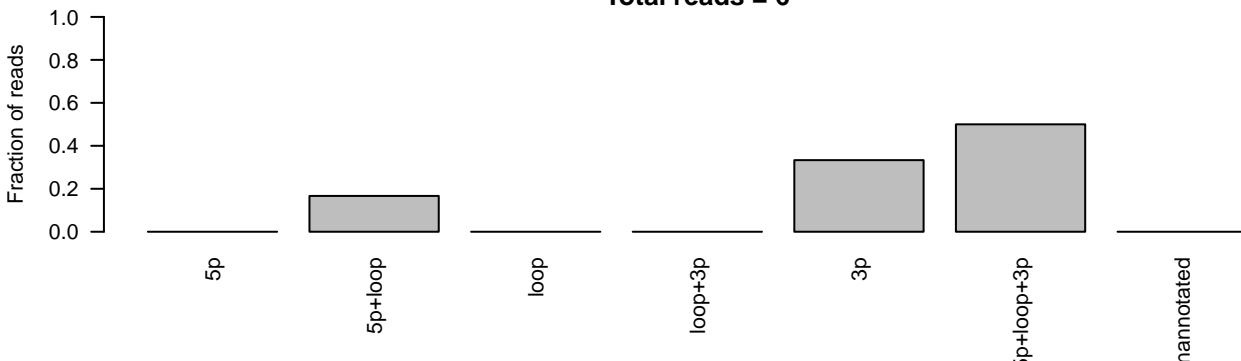

**B) Normal fibroblast miRNA sequencing**  
ID=MI0003676\_1;accession\_number=MI0003676;Name=hsa-mir-654  
Total reads = 1



**C) PPB Case 14 tumor miRNA sequencing**  
ID=MI0003676\_1;accession\_number=MI0003676;Name=hsa-mir-654  
Total reads = 48

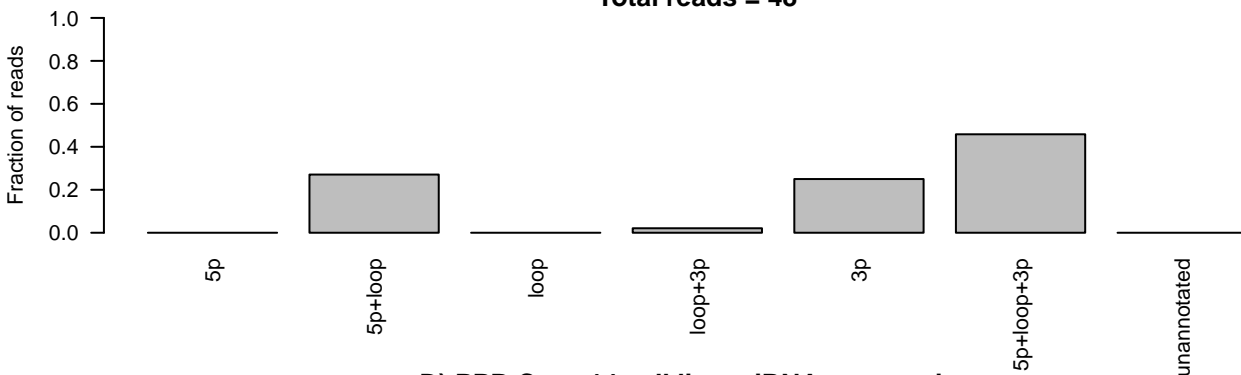

**D) PPB Case 14 cell line miRNA sequencing**  
ID=MI0003676\_1;accession\_number=MI0003676;Name=hsa-mir-654  
Total reads = 5

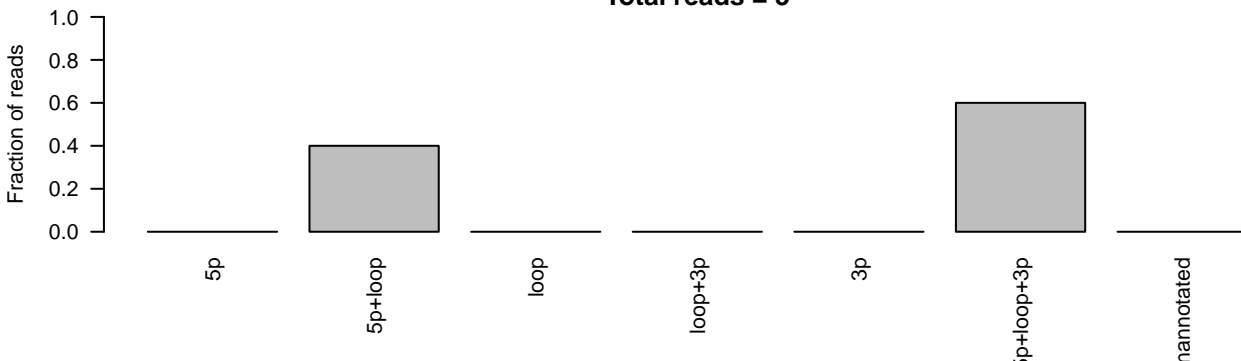

**B) Normal fibroblast miRNA sequencing**  
ID=MI0002466\_1;accession\_number=MI0002466;Name=hsa-mir-376b  
Total reads = 1



**C) PPB Case 14 tumor miRNA sequencing**  
ID=MI0002466\_1;accession\_number=MI0002466;Name=hsa-mir-376b  
Total reads = 28

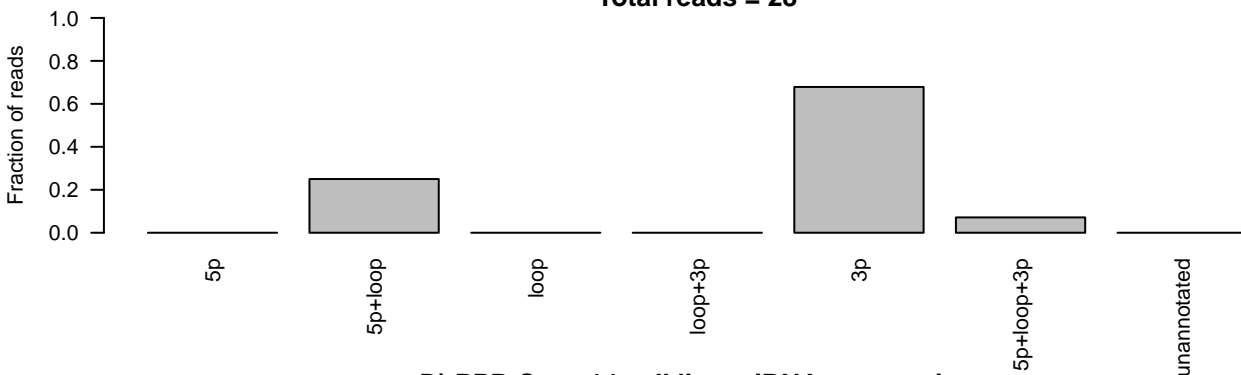

**D) PPB Case 14 cell line miRNA sequencing**  
ID=MI0002466\_1;accession\_number=MI0002466;Name=hsa-mir-376b  
Total reads = 0





**B) Normal fibroblast miRNA sequencing**  
ID=MI0005539\_1;accession\_number=MI0005539;Name=hsa-mir-541  
Total reads = 1



**C) PPB Case 14 tumor miRNA sequencing**  
ID=MI0005539\_1;accession\_number=MI0005539;Name=hsa-mir-541  
Total reads = 19

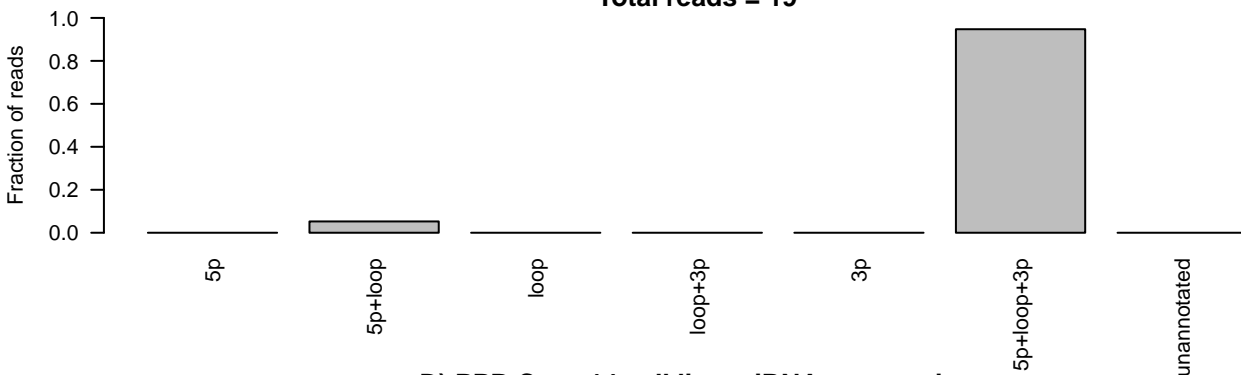

**D) PPB Case 14 cell line miRNA sequencing**  
ID=MI0005539\_1;accession\_number=MI0005539;Name=hsa-mir-541  
Total reads = 1



**B) Normal fibroblast miRNA sequencing**  
ID=MI0003644\_1;accession\_number=MI0003644;Name=hsa-mir-630  
Total reads = 1



**C) PPB Case 14 tumor miRNA sequencing**  
ID=MI0003644\_1;accession\_number=MI0003644;Name=hsa-mir-630  
Total reads = 0



**D) PPB Case 14 cell line miRNA sequencing**  
ID=MI0003644\_1;accession\_number=MI0003644;Name=hsa-mir-630  
Total reads = 0



**B) Normal fibroblast miRNA sequencing**  
ID=MI0003679\_1;accession\_number=MI0003679;Name=hsa-mir-549a  
Total reads = 0

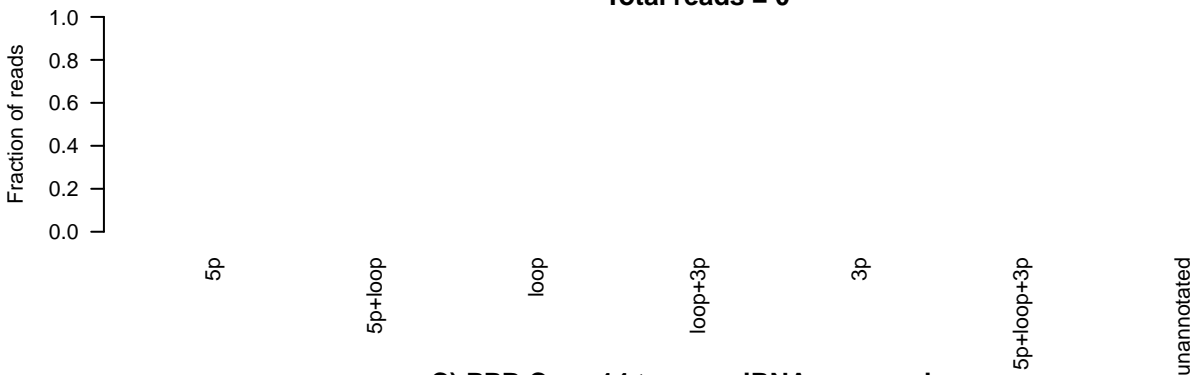

**C) PPB Case 14 tumor miRNA sequencing**  
ID=MI0003679\_1;accession\_number=MI0003679;Name=hsa-mir-549a  
Total reads = 0



**D) PPB Case 14 cell line miRNA sequencing**  
ID=MI0003679\_1;accession\_number=MI0003679;Name=hsa-mir-549a  
Total reads = 0



**B) Normal fibroblast miRNA sequencing**  
ID=MI0016883\_1;accession\_number=MI0016883;Name=hsa-mir-4517  
Total reads = 1

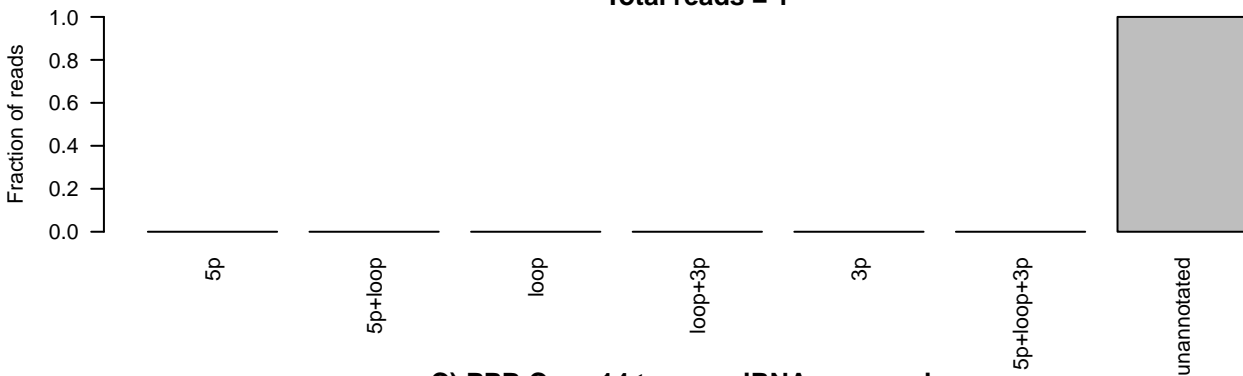

**C) PPB Case 14 tumor miRNA sequencing**  
ID=MI0016883\_1;accession\_number=MI0016883;Name=hsa-mir-4517  
Total reads = 0



**D) PPB Case 14 cell line miRNA sequencing**  
ID=MI0016883\_1;accession\_number=MI0016883;Name=hsa-mir-4517  
Total reads = 0



**B) Normal fibroblast miRNA sequencing**  
ID=MI0003138\_1;accession\_number=MI0003138;Name=hsa-mir-497  
Total reads = 2

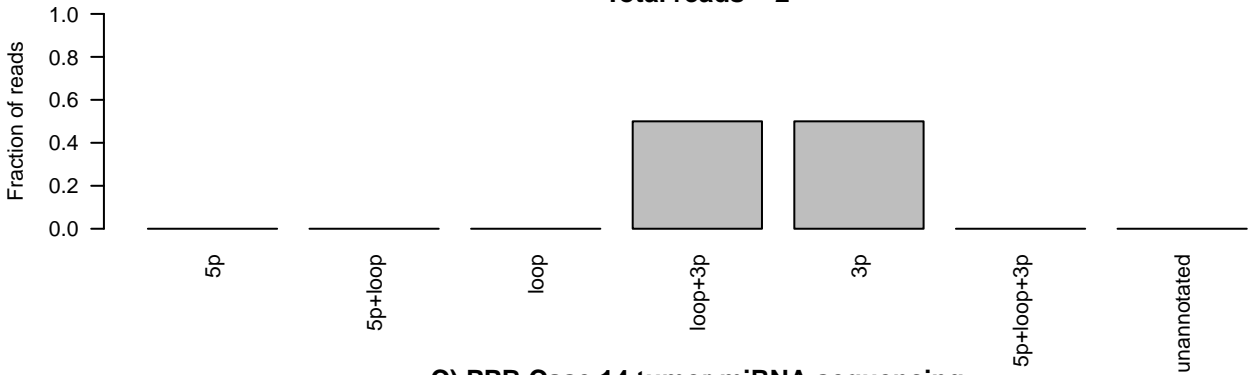

**C) PPB Case 14 tumor miRNA sequencing**  
ID=MI0003138\_1;accession\_number=MI0003138;Name=hsa-mir-497  
Total reads = 4

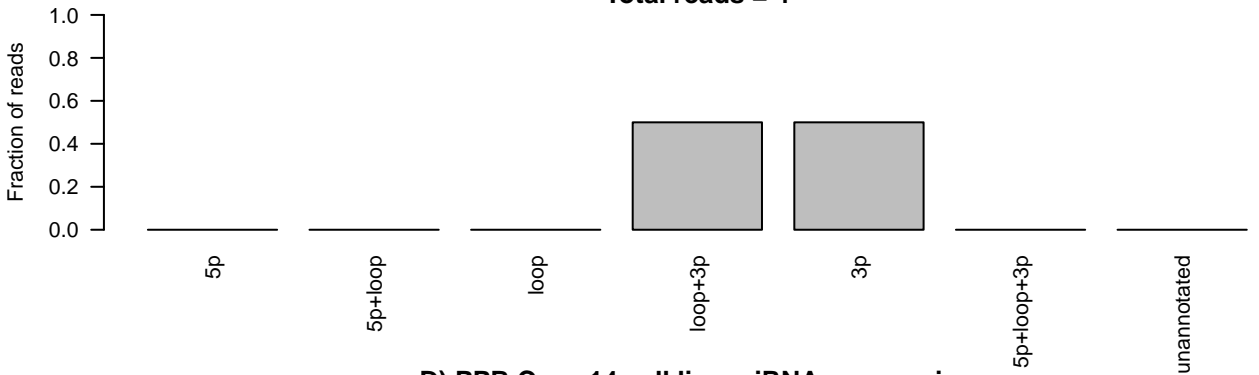

**D) PPB Case 14 cell line miRNA sequencing**  
ID=MI0003138\_1;accession\_number=MI0003138;Name=hsa-mir-497  
Total reads = 0



**B) Normal fibroblast miRNA sequencing**  
ID=MI0000769\_1;accession\_number=MI0000769;Name=hsa-mir-365b  
Total reads = 1



**C) PPB Case 14 tumor miRNA sequencing**  
ID=MI0000769\_1;accession\_number=MI0000769;Name=hsa-mir-365b  
Total reads = 5

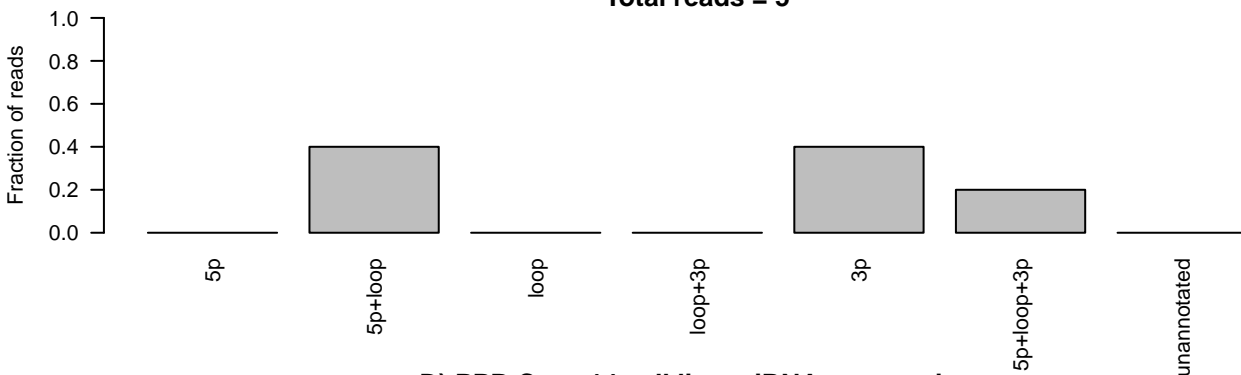

**D) PPB Case 14 cell line miRNA sequencing**  
ID=MI0000769\_1;accession\_number=MI0000769;Name=hsa-mir-365b  
Total reads = 2

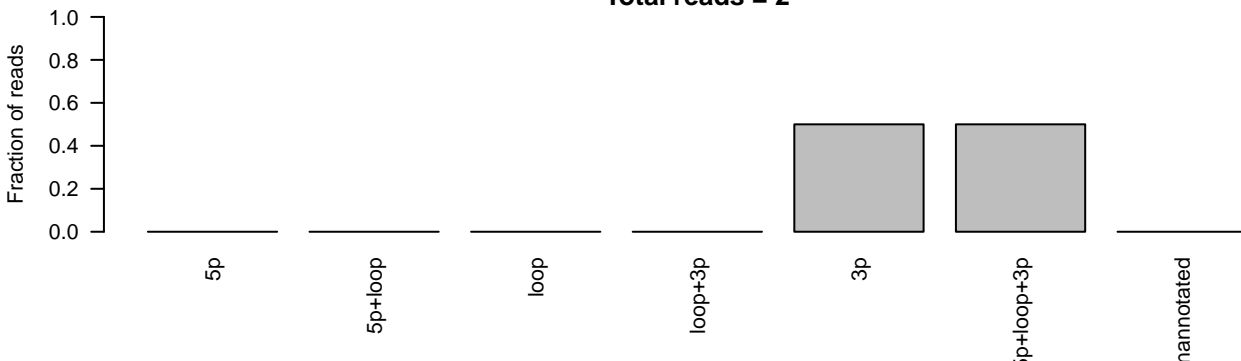

**B) Normal fibroblast miRNA sequencing**  
ID=MI0016005\_1;accession\_number=MI0016005;Name=hsa-mir-3615  
Total reads = 0



**C) PPB Case 14 tumor miRNA sequencing**  
ID=MI0016005\_1;accession\_number=MI0016005;Name=hsa-mir-3615  
Total reads = 0



**D) PPB Case 14 cell line miRNA sequencing**  
ID=MI0016005\_1;accession\_number=MI0016005;Name=hsa-mir-3615  
Total reads = 1

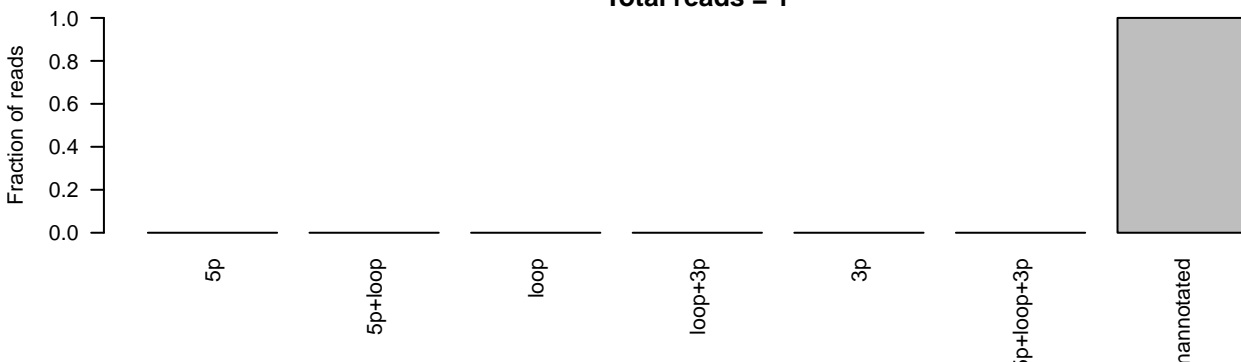

**B) Normal fibroblast miRNA sequencing**  
ID=MI0014228\_1;accession\_number=MI0014228;Name=hsa-mir-3065  
Total reads = 1



**C) PPB Case 14 tumor miRNA sequencing**  
ID=MI0014228\_1;accession\_number=MI0014228;Name=hsa-mir-3065  
Total reads = 8

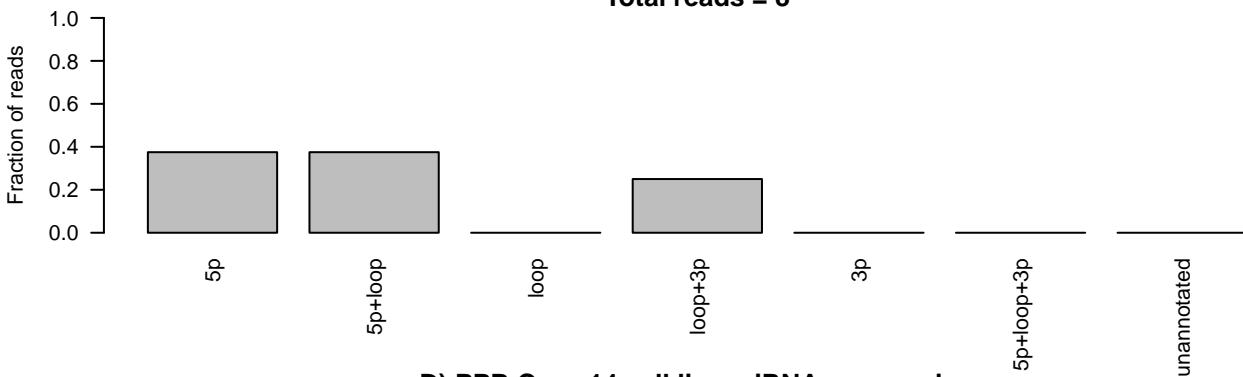

**D) PPB Case 14 cell line miRNA sequencing**  
ID=MI0014228\_1;accession\_number=MI0014228;Name=hsa-mir-3065  
Total reads = 0





**B) Normal fibroblast miRNA sequencing**  
ID=MI0000814\_1;accession\_number=MI0000814;Name=hsa-mir-338  
Total reads = 1

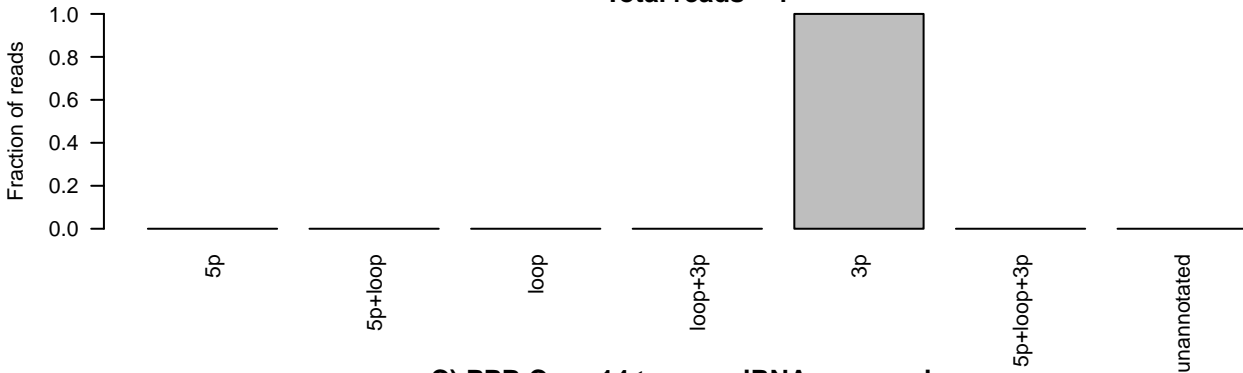

**C) PPB Case 14 tumor miRNA sequencing**  
ID=MI0000814\_1;accession\_number=MI0000814;Name=hsa-mir-338  
Total reads = 8

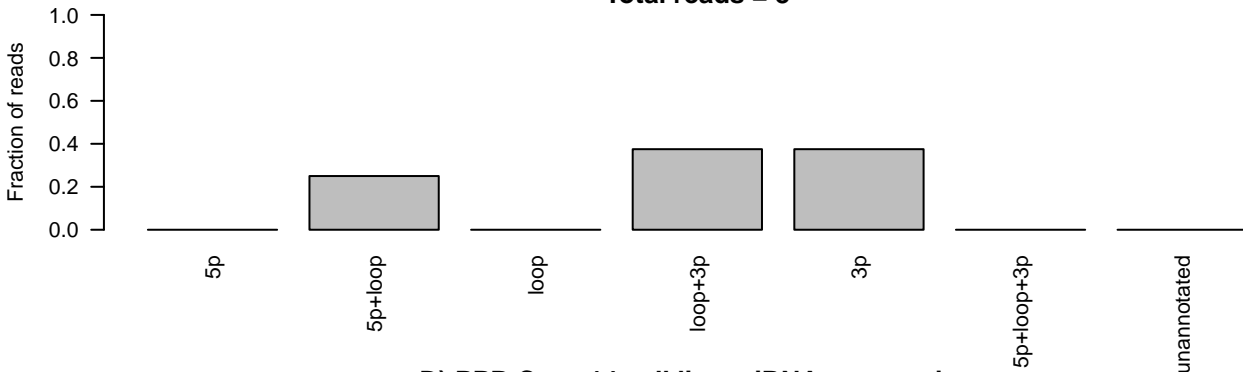

**D) PPB Case 14 cell line miRNA sequencing**  
ID=MI0000814\_1;accession\_number=MI0000814;Name=hsa-mir-338  
Total reads = 0



**B) Normal fibroblast miRNA sequencing**  
ID=MI0017432\_1;accession\_number=MI0017432;Name=hsa-mir-2467  
Total reads = 1



**C) PPB Case 14 tumor miRNA sequencing**  
ID=MI0017432\_1;accession\_number=MI0017432;Name=hsa-mir-2467  
Total reads = 0



**D) PPB Case 14 cell line miRNA sequencing**  
ID=MI0017432\_1;accession\_number=MI0017432;Name=hsa-mir-2467  
Total reads = 0



**B) Normal fibroblast miRNA sequencing**  
ID=MI0014238\_1;accession\_number=MI0014238;Name=hsa-mir-3193  
Total reads = 1

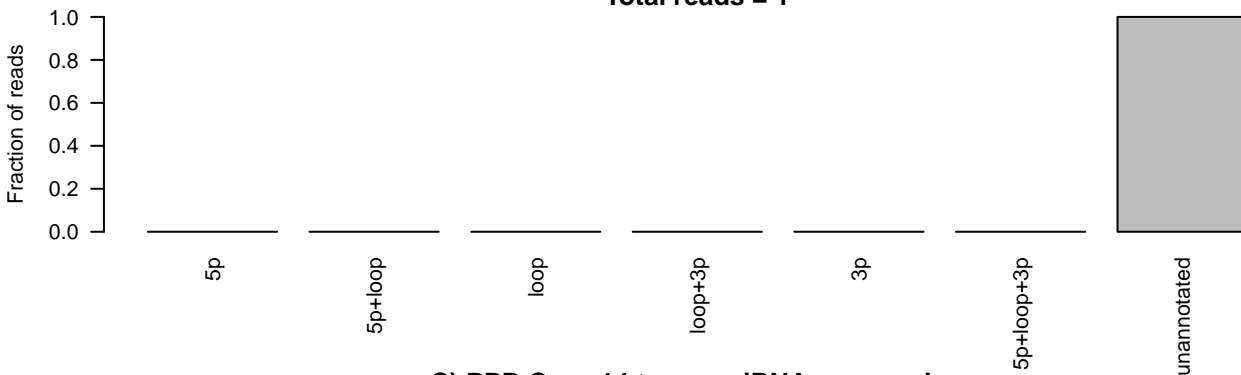

**C) PPB Case 14 tumor miRNA sequencing**  
ID=MI0014238\_1;accession\_number=MI0014238;Name=hsa-mir-3193  
Total reads = 0

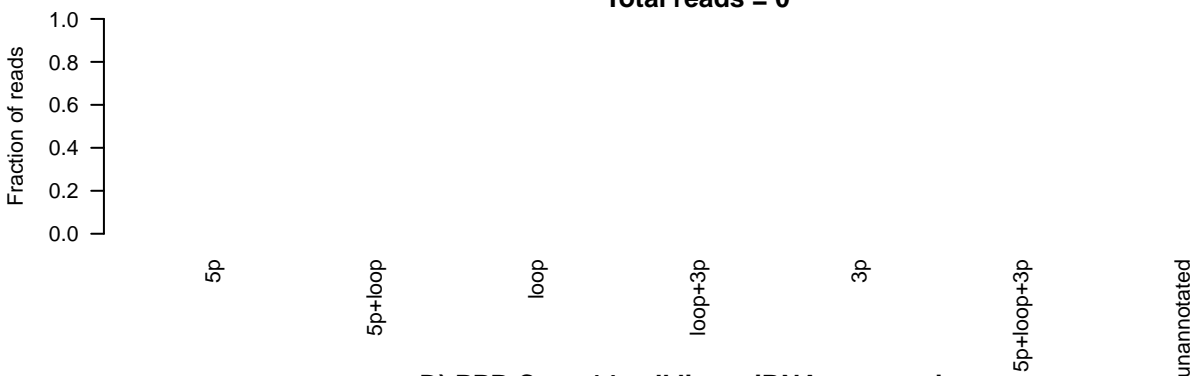

**D) PPB Case 14 cell line miRNA sequencing**  
ID=MI0014238\_1;accession\_number=MI0014238;Name=hsa-mir-3193  
Total reads = 0



**B) Normal fibroblast miRNA sequencing**  
ID=MI0016746\_1;accession\_number=MI0016746;Name=hsa-mir-548o-2  
Total reads = 1



**C) PPB Case 14 tumor miRNA sequencing**  
ID=MI0016746\_1;accession\_number=MI0016746;Name=hsa-mir-548o-2  
Total reads = 0



**D) PPB Case 14 cell line miRNA sequencing**  
ID=MI0016746\_1;accession\_number=MI0016746;Name=hsa-mir-548o-2  
Total reads = 0



**B) Normal fibroblast miRNA sequencing**  
ID=MI0014239\_1;accession\_number=MI0014239;Name=hsa-mir-3194  
Total reads = 1



**C) PPB Case 14 tumor miRNA sequencing**  
ID=MI0014239\_1;accession\_number=MI0014239;Name=hsa-mir-3194  
Total reads = 1

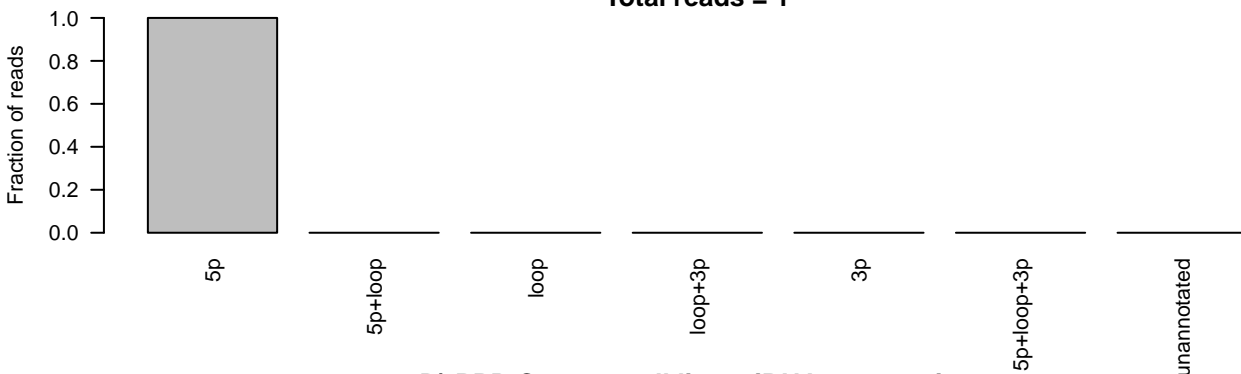

**D) PPB Case 14 cell line miRNA sequencing**  
ID=MI0014239\_1;accession\_number=MI0014239;Name=hsa-mir-3194  
Total reads = 0



**B) Normal fibroblast miRNA sequencing**  
ID=MI0000651\_1;accession\_number=MI0000651;Name=hsa-mir-1-1  
Total reads = 1



**C) PPB Case 14 tumor miRNA sequencing**  
ID=MI0000651\_1;accession\_number=MI0000651;Name=hsa-mir-1-1  
Total reads = 0



**D) PPB Case 14 cell line miRNA sequencing**  
ID=MI0000651\_1;accession\_number=MI0000651;Name=hsa-mir-1-1  
Total reads = 0



**B) Normal fibroblast miRNA sequencing**  
ID=MI0005765\_1;accession\_number=MI0005765;Name=hsa-mir-941-3  
Total reads = 0



**C) PPB Case 14 tumor miRNA sequencing**  
ID=MI0005765\_1;accession\_number=MI0005765;Name=hsa-mir-941-3  
Total reads = 2



**D) PPB Case 14 cell line miRNA sequencing**  
ID=MI0005765\_1;accession\_number=MI0005765;Name=hsa-mir-941-3  
Total reads = 0



**B) Normal fibroblast miRNA sequencing**  
ID=MI0014249\_1;accession\_number=MI0014249;Name=hsa-mir-3200  
Total reads = 1

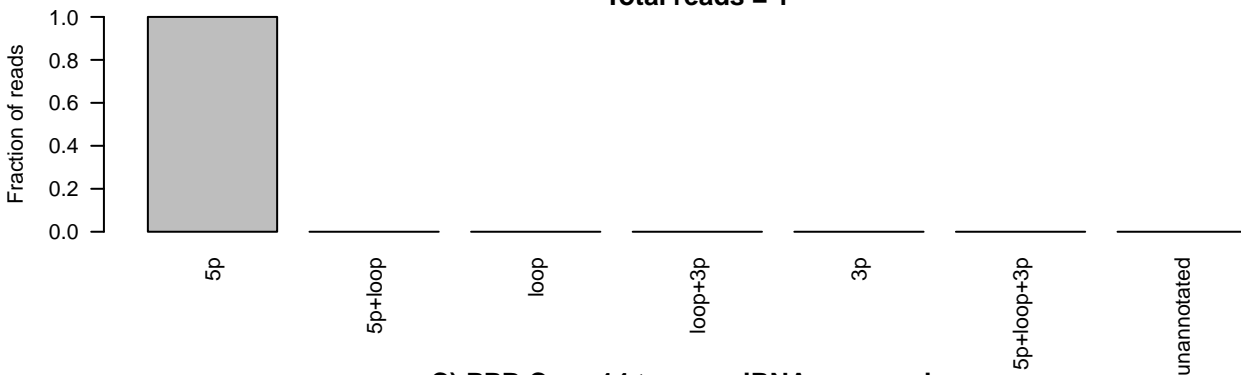

**C) PPB Case 14 tumor miRNA sequencing**  
ID=MI0014249\_1;accession\_number=MI0014249;Name=hsa-mir-3200  
Total reads = 0



**D) PPB Case 14 cell line miRNA sequencing**  
ID=MI0014249\_1;accession\_number=MI0014249;Name=hsa-mir-3200  
Total reads = 1





**B) Normal fibroblast miRNA sequencing**  
ID=MI0000086\_1;accession\_number=MI0000086;Name=hsa-mir-28  
Total reads = 1



**C) PPB Case 14 tumor miRNA sequencing**  
ID=MI0000086\_1;accession\_number=MI0000086;Name=hsa-mir-28  
Total reads = 0



**D) PPB Case 14 cell line miRNA sequencing**  
ID=MI0000086\_1;accession\_number=MI0000086;Name=hsa-mir-28  
Total reads = 0



**B) Normal fibroblast miRNA sequencing**  
ID=MI0000294\_1;accession\_number=MI0000294;Name=hsa-mir-218-1  
Total reads = 1



**C) PPB Case 14 tumor miRNA sequencing**  
ID=MI0000294\_1;accession\_number=MI0000294;Name=hsa-mir-218-1  
Total reads = 2

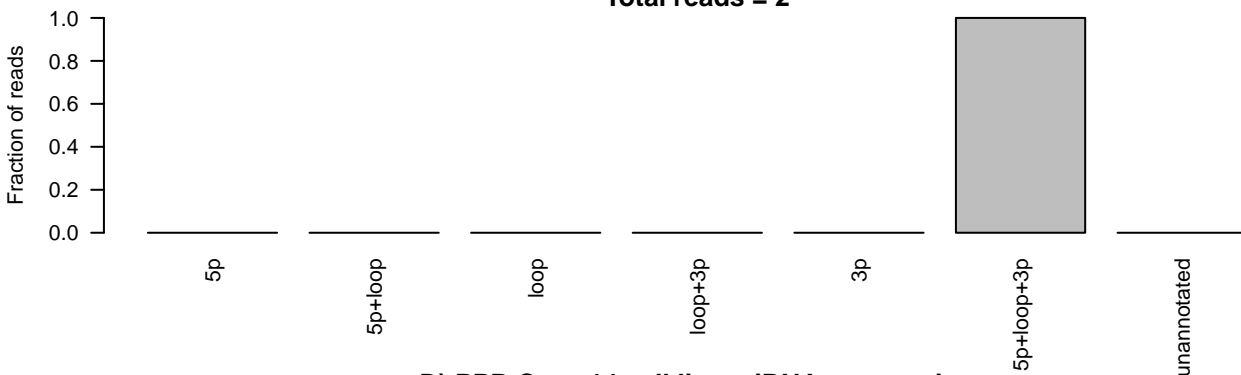

**D) PPB Case 14 cell line miRNA sequencing**  
ID=MI0000294\_1;accession\_number=MI0000294;Name=hsa-mir-218-1  
Total reads = 0



**B) Normal fibroblast miRNA sequencing**  
ID=MI0003673\_1;accession\_number=MI0003673;Name=hsa-mir-449b  
Total reads = 1



**C) PPB Case 14 tumor miRNA sequencing**  
ID=MI0003673\_1;accession\_number=MI0003673;Name=hsa-mir-449b  
Total reads = 0



**D) PPB Case 14 cell line miRNA sequencing**  
ID=MI0003673\_1;accession\_number=MI0003673;Name=hsa-mir-449b  
Total reads = 0



**B) Normal fibroblast miRNA sequencing**  
ID=MI0011284\_1;accession\_number=MI0011284;Name=hsa-mir-2277  
Total reads = 1



**C) PPB Case 14 tumor miRNA sequencing**  
ID=MI0011284\_1;accession\_number=MI0011284;Name=hsa-mir-2277  
Total reads = 0

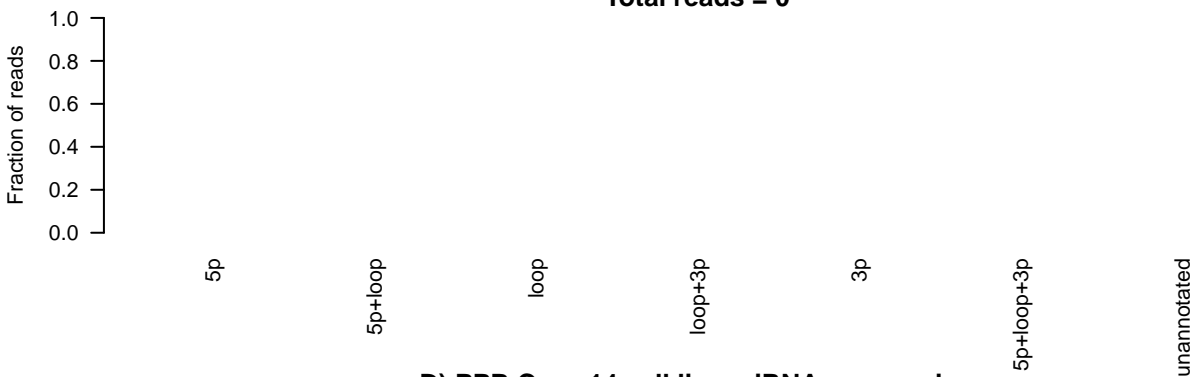

**D) PPB Case 14 cell line miRNA sequencing**  
ID=MI0011284\_1;accession\_number=MI0011284;Name=hsa-mir-2277  
Total reads = 0



**B) Normal fibroblast miRNA sequencing**  
ID=MI0016807\_1;accession\_number=MI0016807;Name=hsa-mir-4461  
Total reads = 0

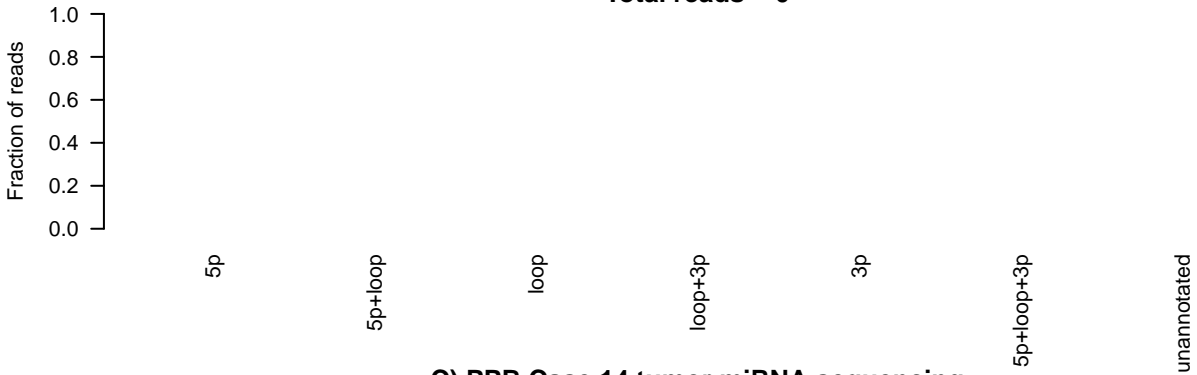

**C) PPB Case 14 tumor miRNA sequencing**  
ID=MI0016807\_1;accession\_number=MI0016807;Name=hsa-mir-4461  
Total reads = 0

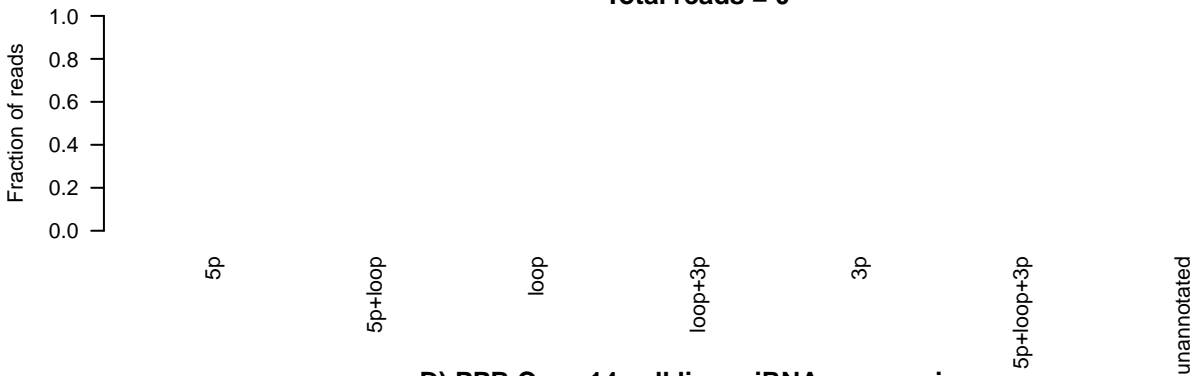

**D) PPB Case 14 cell line miRNA sequencing**  
ID=MI0016807\_1;accession\_number=MI0016807;Name=hsa-mir-4461  
Total reads = 0

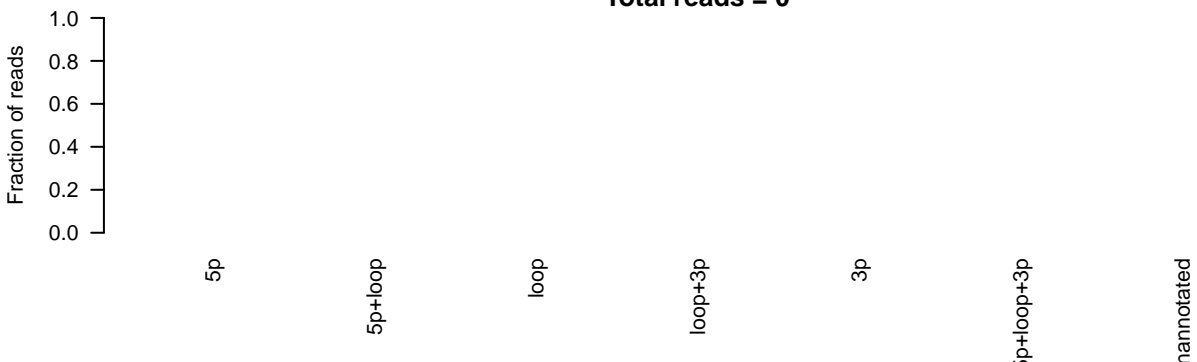

**B) Normal fibroblast miRNA sequencing**  
ID=MI0003591\_1;accession\_number=MI0003591;Name=hsa-mir-584  
Total reads = 1



**C) PPB Case 14 tumor miRNA sequencing**  
ID=MI0003591\_1;accession\_number=MI0003591;Name=hsa-mir-584  
Total reads = 0



**D) PPB Case 14 cell line miRNA sequencing**  
ID=MI0003591\_1;accession\_number=MI0003591;Name=hsa-mir-584  
Total reads = 0



**B) Normal fibroblast miRNA sequencing**  
ID=MI0000802\_1;accession\_number=MI0000802;Name=hsa-mir-340  
Total reads = 1



**C) PPB Case 14 tumor miRNA sequencing**  
ID=MI0000802\_1;accession\_number=MI0000802;Name=hsa-mir-340  
Total reads = 2

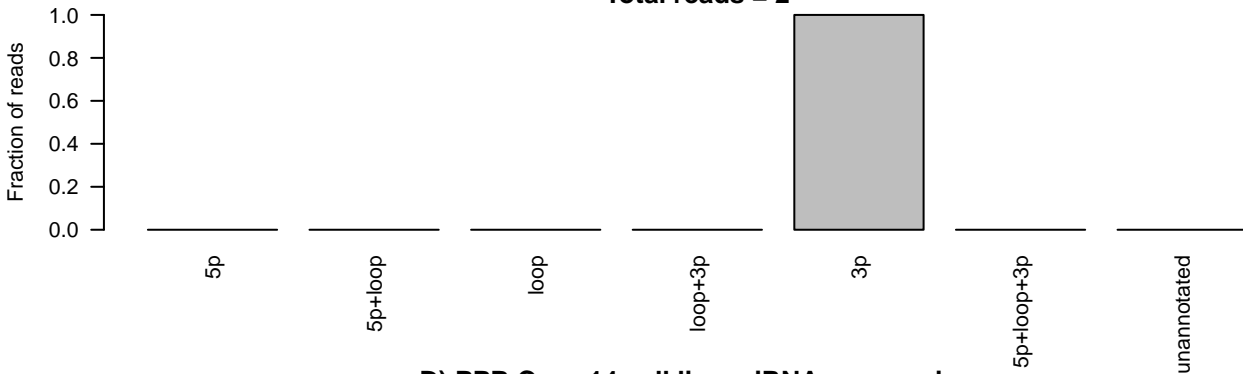

**D) PPB Case 14 cell line miRNA sequencing**  
ID=MI0000802\_1;accession\_number=MI0000802;Name=hsa-mir-340  
Total reads = 0



**B) Normal fibroblast miRNA sequencing**  
ID=MI0014167\_1;accession\_number=MI0014167;Name=hsa-mir-3143  
Total reads = 1



**C) PPB Case 14 tumor miRNA sequencing**  
ID=MI0014167\_1;accession\_number=MI0014167;Name=hsa-mir-3143  
Total reads = 0



**D) PPB Case 14 cell line miRNA sequencing**  
ID=MI0014167\_1;accession\_number=MI0014167;Name=hsa-mir-3143  
Total reads = 0





**B) Normal fibroblast miRNA sequencing**  
ID=MI0006326\_1;accession\_number=MI0006326;Name=hsa-mir-1236  
Total reads = 1

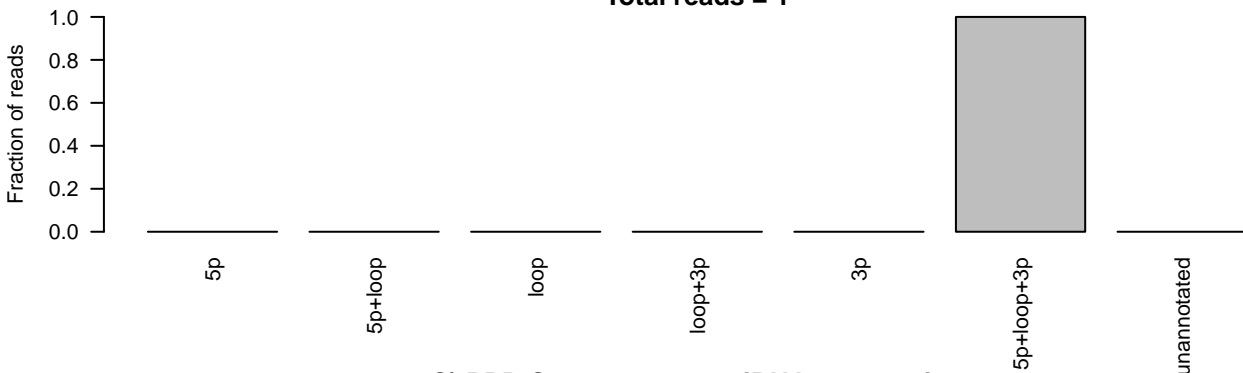

**C) PPB Case 14 tumor miRNA sequencing**  
ID=MI0006326\_1;accession\_number=MI0006326;Name=hsa-mir-1236  
Total reads = 1

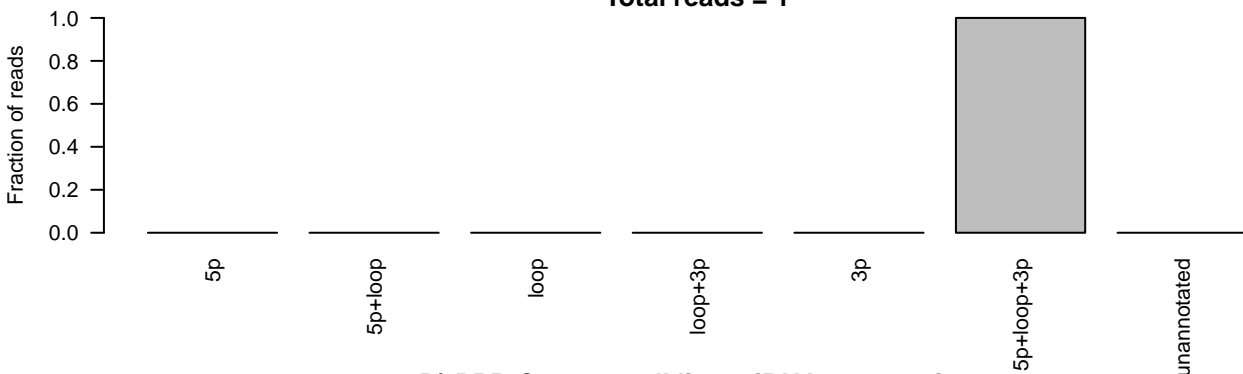

**D) PPB Case 14 cell line miRNA sequencing**  
ID=MI0006326\_1;accession\_number=MI0006326;Name=hsa-mir-1236  
Total reads = 0



**B) Normal fibroblast miRNA sequencing**  
ID=MI0000296\_1;accession\_number=MI0000296;Name=hsa-mir-219-1  
Total reads = 2

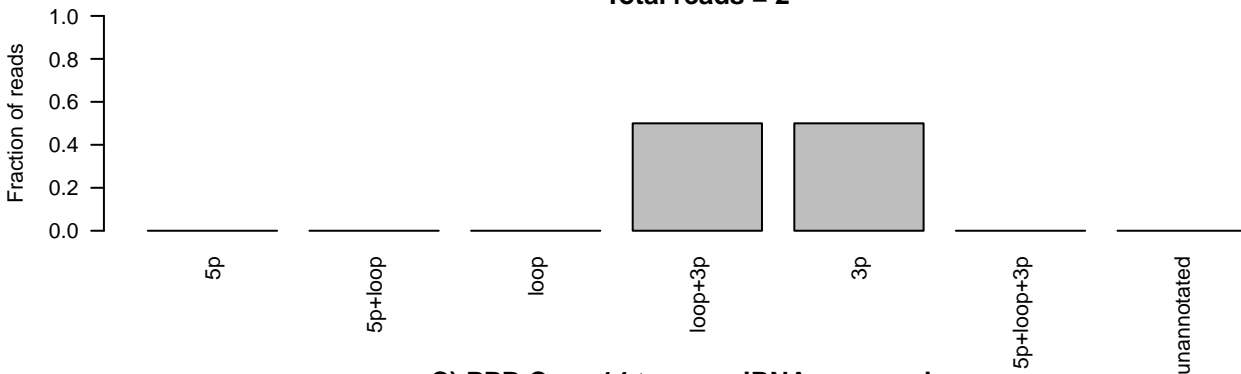

**C) PPB Case 14 tumor miRNA sequencing**  
ID=MI0000296\_1;accession\_number=MI0000296;Name=hsa-mir-219-1  
Total reads = 110

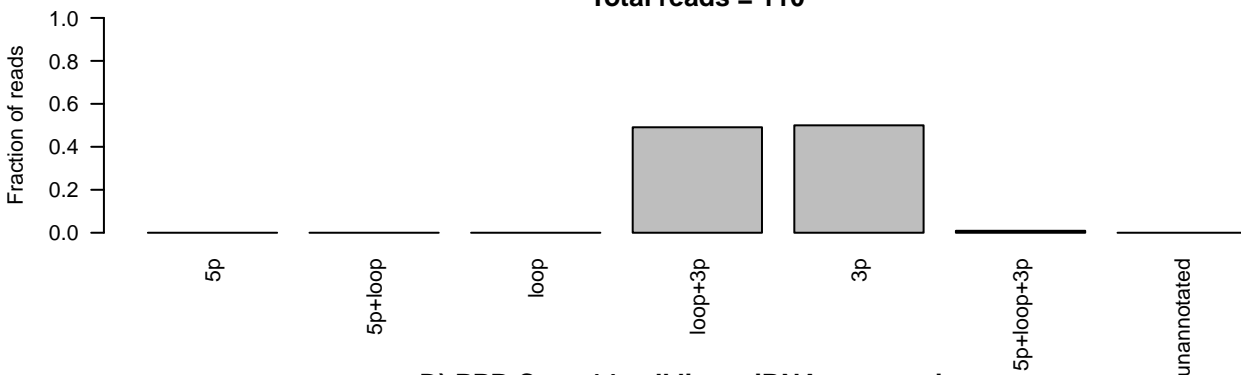

**D) PPB Case 14 cell line miRNA sequencing**  
ID=MI0000296\_1;accession\_number=MI0000296;Name=hsa-mir-219-1  
Total reads = 4

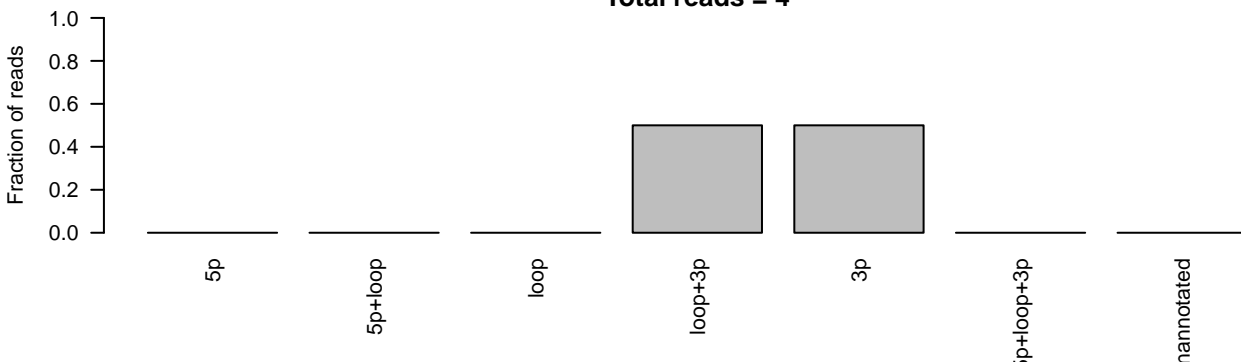

**B) Normal fibroblast miRNA sequencing**  
ID=MI0014171\_1;accession\_number=MI0014171;Name=hsa-mir-1273c  
Total reads = 1

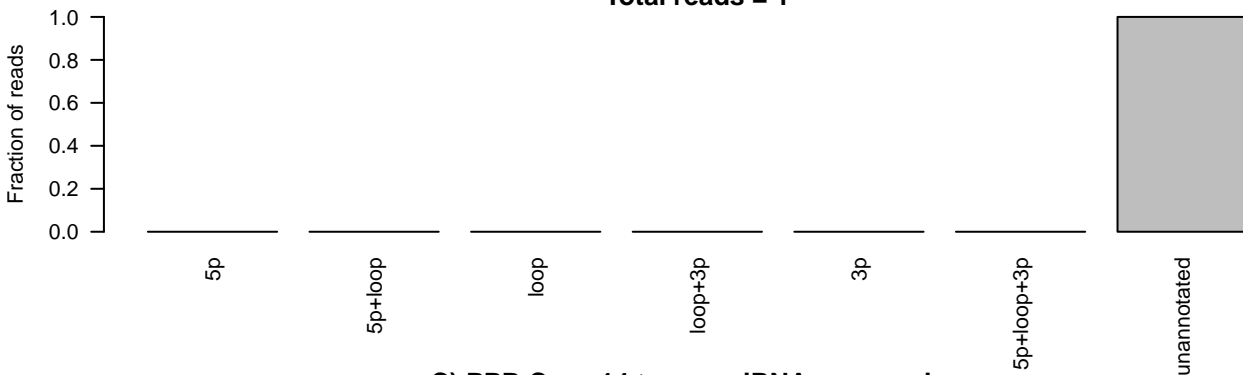

**C) PPB Case 14 tumor miRNA sequencing**  
ID=MI0014171\_1;accession\_number=MI0014171;Name=hsa-mir-1273c  
Total reads = 0



**D) PPB Case 14 cell line miRNA sequencing**  
ID=MI0014171\_1;accession\_number=MI0014171;Name=hsa-mir-1273c  
Total reads = 0



**B) Normal fibroblast miRNA sequencing**  
ID=MI0003600\_1;accession\_number=MI0003600;Name=hsa-mir-550a-1  
Total reads = 1

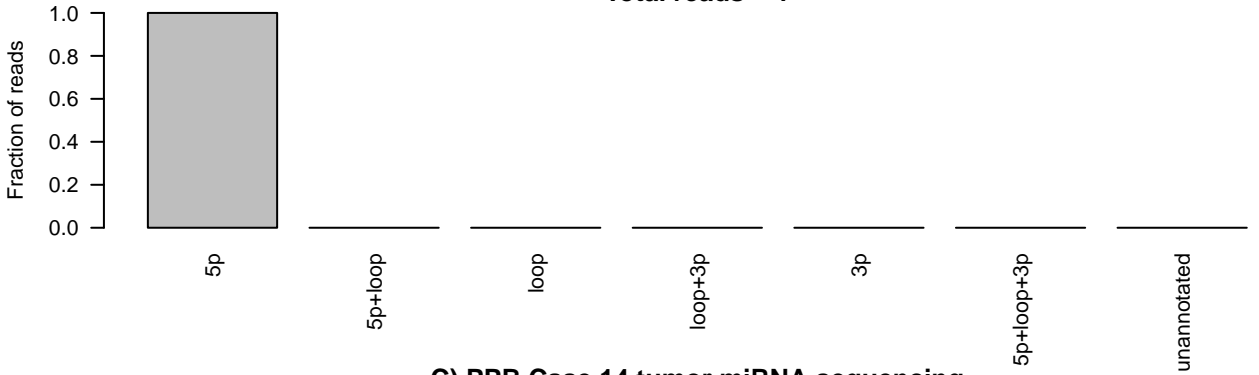

**C) PPB Case 14 tumor miRNA sequencing**  
ID=MI0003600\_1;accession\_number=MI0003600;Name=hsa-mir-550a-1  
Total reads = 0



**D) PPB Case 14 cell line miRNA sequencing**  
ID=MI0003600\_1;accession\_number=MI0003600;Name=hsa-mir-550a-1  
Total reads = 0



**B) Normal fibroblast miRNA sequencing**  
ID=MI0016686\_1;accession\_number=MI0016686;Name=hsa-mir-550b-1  
Total reads = 2

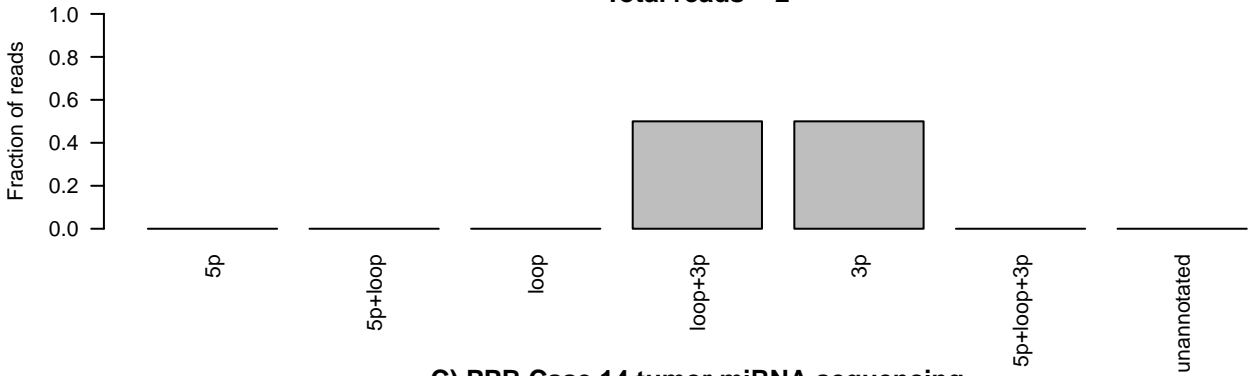

**C) PPB Case 14 tumor miRNA sequencing**  
ID=MI0016686\_1;accession\_number=MI0016686;Name=hsa-mir-550b-1  
Total reads = 0



**D) PPB Case 14 cell line miRNA sequencing**  
ID=MI0016686\_1;accession\_number=MI0016686;Name=hsa-mir-550b-1  
Total reads = 0



**B) Normal fibroblast miRNA sequencing**  
ID=MI0003674\_1;accession\_number=MI0003674;Name=hsa-mir-653  
Total reads = 0



**C) PPB Case 14 tumor miRNA sequencing**  
ID=MI0003674\_1;accession\_number=MI0003674;Name=hsa-mir-653  
Total reads = 0



**D) PPB Case 14 cell line miRNA sequencing**  
ID=MI0003674\_1;accession\_number=MI0003674;Name=hsa-mir-653  
Total reads = 0



**B) Normal fibroblast miRNA sequencing**  
ID=MI0016821\_1;accession\_number=MI0016821;Name=hsa-mir-4470  
Total reads = 1



**C) PPB Case 14 tumor miRNA sequencing**  
ID=MI0016821\_1;accession\_number=MI0016821;Name=hsa-mir-4470  
Total reads = 1



**D) PPB Case 14 cell line miRNA sequencing**  
ID=MI0016821\_1;accession\_number=MI0016821;Name=hsa-mir-4470  
Total reads = 0



**B) Normal fibroblast miRNA sequencing**  
ID=MI0003126\_1;accession\_number=MI0003126;Name=hsa-mir-491  
Total reads = 1

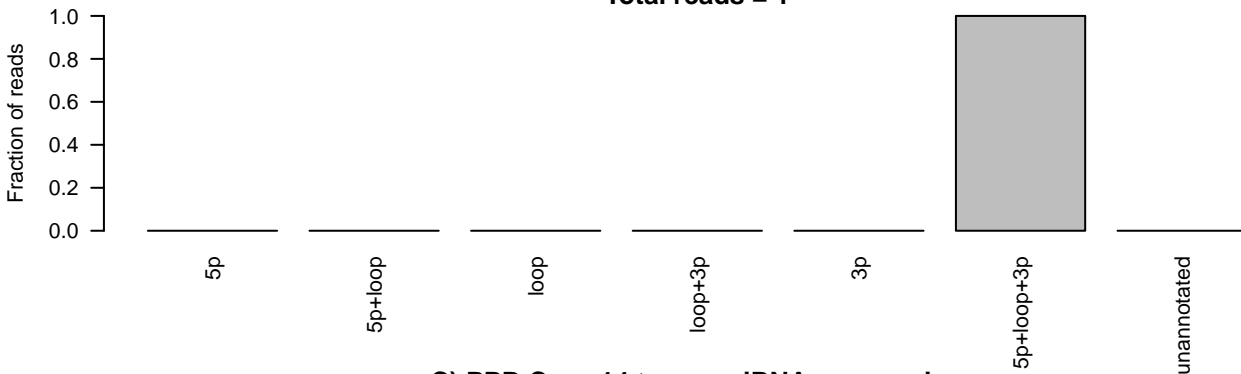

**C) PPB Case 14 tumor miRNA sequencing**  
ID=MI0003126\_1;accession\_number=MI0003126;Name=hsa-mir-491  
Total reads = 2

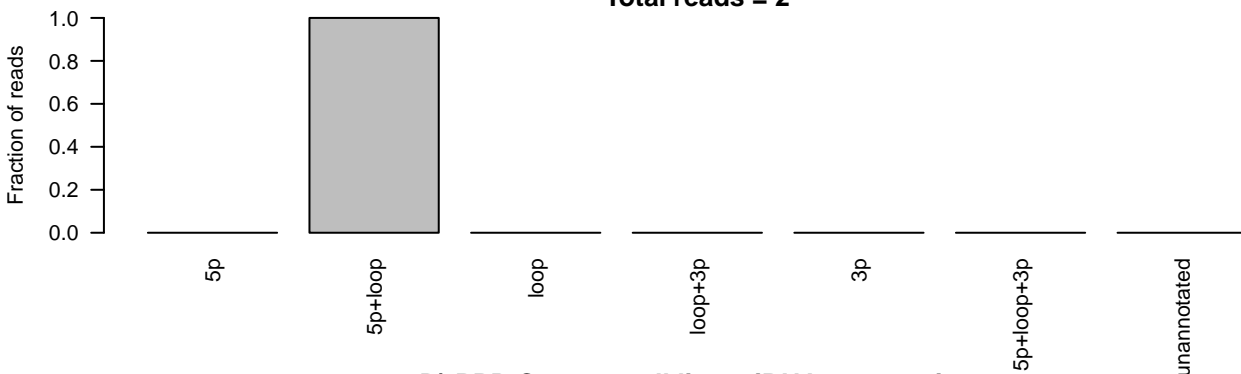

**D) PPB Case 14 cell line miRNA sequencing**  
ID=MI0003126\_1;accession\_number=MI0003126;Name=hsa-mir-491  
Total reads = 0





**B) Normal fibroblast miRNA sequencing**  
ID=MI0000484\_1;accession\_number=MI0000484;Name=hsa-mir-188  
Total reads = 1



**C) PPB Case 14 tumor miRNA sequencing**  
ID=MI0000484\_1;accession\_number=MI0000484;Name=hsa-mir-188  
Total reads = 3

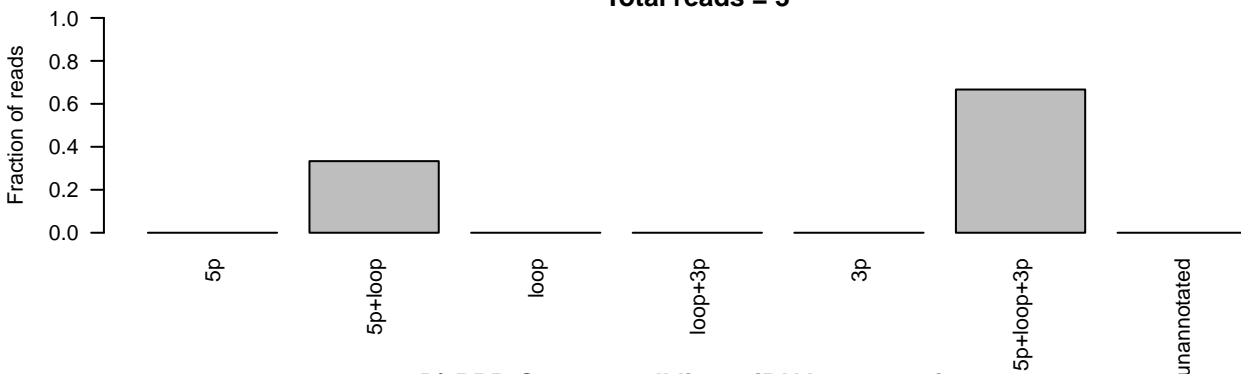

**D) PPB Case 14 cell line miRNA sequencing**  
ID=MI0000484\_1;accession\_number=MI0000484;Name=hsa-mir-188  
Total reads = 0



**B) Normal fibroblast miRNA sequencing**  
ID=MI0003184\_1;accession\_number=MI0003184;Name=hsa-mir-500a  
Total reads = 1

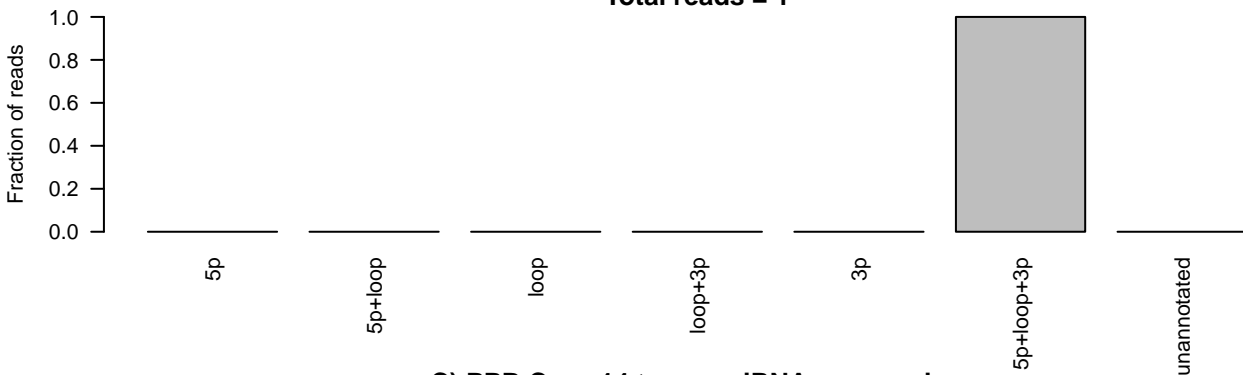

**C) PPB Case 14 tumor miRNA sequencing**  
ID=MI0003184\_1;accession\_number=MI0003184;Name=hsa-mir-500a  
Total reads = 10

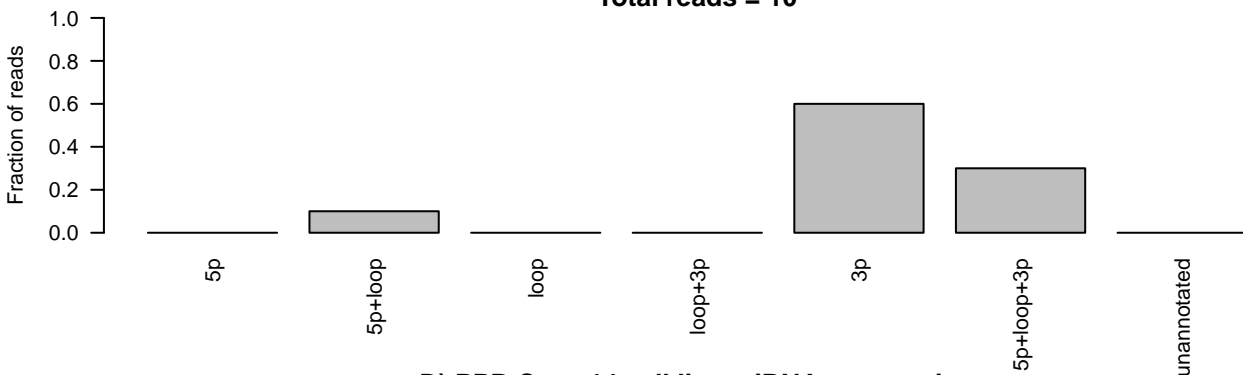

**D) PPB Case 14 cell line miRNA sequencing**  
ID=MI0003184\_1;accession\_number=MI0003184;Name=hsa-mir-500a  
Total reads = 5

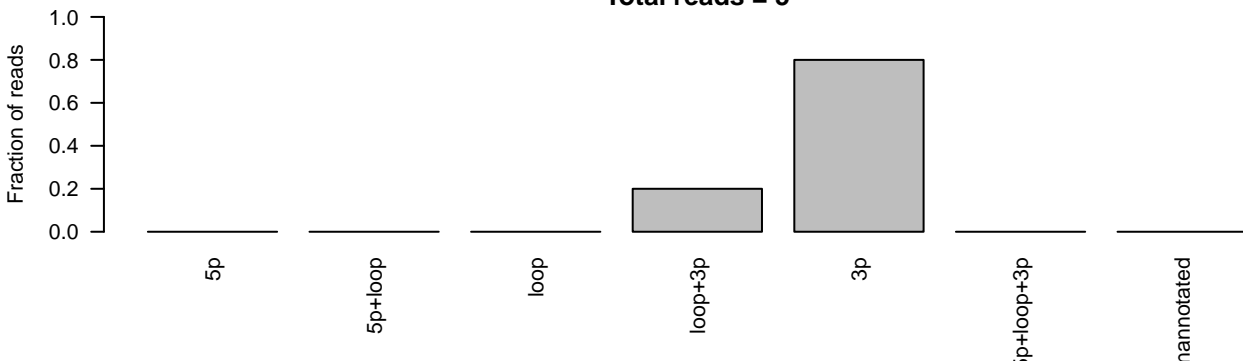

**B) Normal fibroblast miRNA sequencing**  
ID=MI0003185\_1;accession\_number=MI0003185;Name=hsa-mir-501  
Total reads = 1



**C) PPB Case 14 tumor miRNA sequencing**  
ID=MI0003185\_1;accession\_number=MI0003185;Name=hsa-mir-501  
Total reads = 6

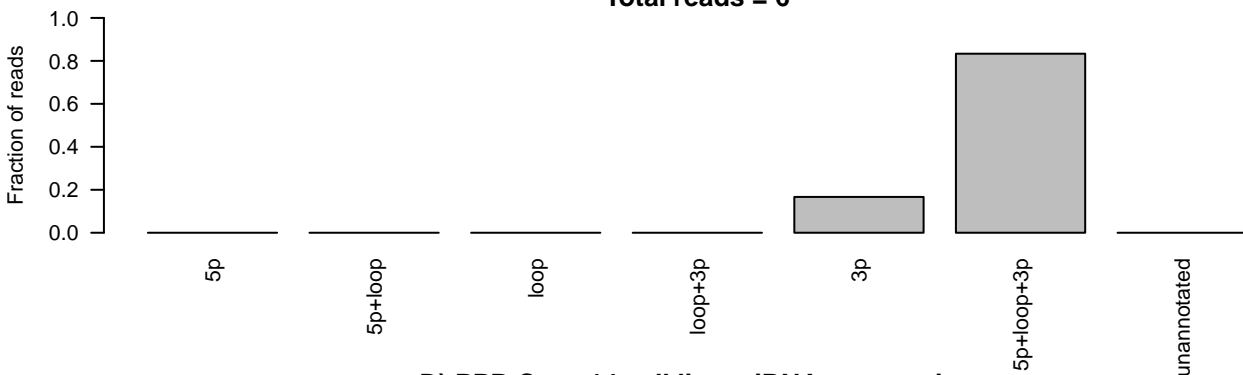

**D) PPB Case 14 cell line miRNA sequencing**  
ID=MI0003185\_1;accession\_number=MI0003185;Name=hsa-mir-501  
Total reads = 1



**B) Normal fibroblast miRNA sequencing**  
ID=MI0003684\_1;accession\_number=MI0003684;Name=hsa-mir-660  
Total reads = 2

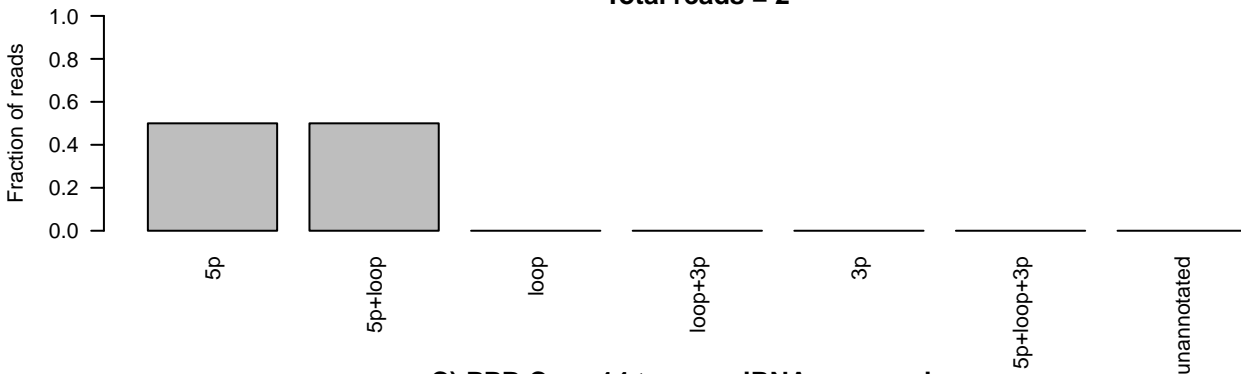

**C) PPB Case 14 tumor miRNA sequencing**  
ID=MI0003684\_1;accession\_number=MI0003684;Name=hsa-mir-660  
Total reads = 15

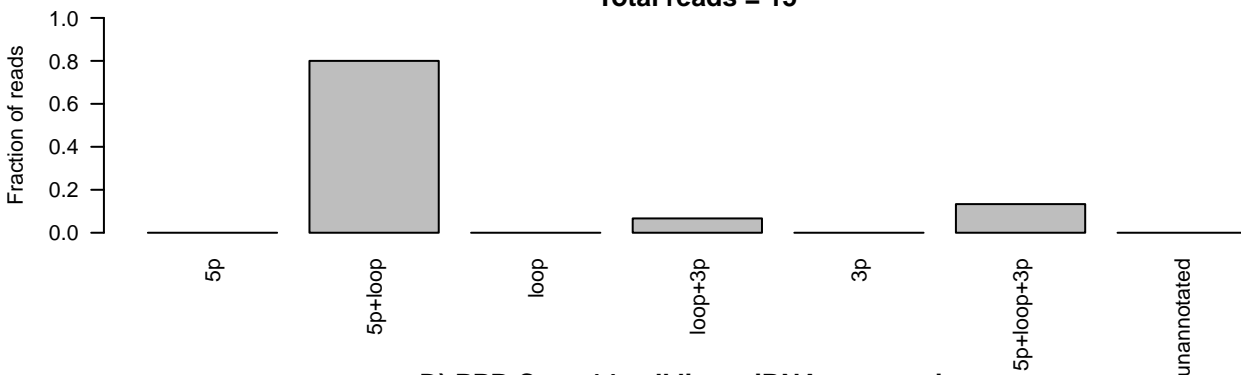

**D) PPB Case 14 cell line miRNA sequencing**  
ID=MI0003684\_1;accession\_number=MI0003684;Name=hsa-mir-660  
Total reads = 1



**B) Normal fibroblast miRNA sequencing**  
ID=MI0001518\_1;accession\_number=MI0001518;Name=hsa-mir-18b  
Total reads = 1



**C) PPB Case 14 tumor miRNA sequencing**  
ID=MI0001518\_1;accession\_number=MI0001518;Name=hsa-mir-18b  
Total reads = 1

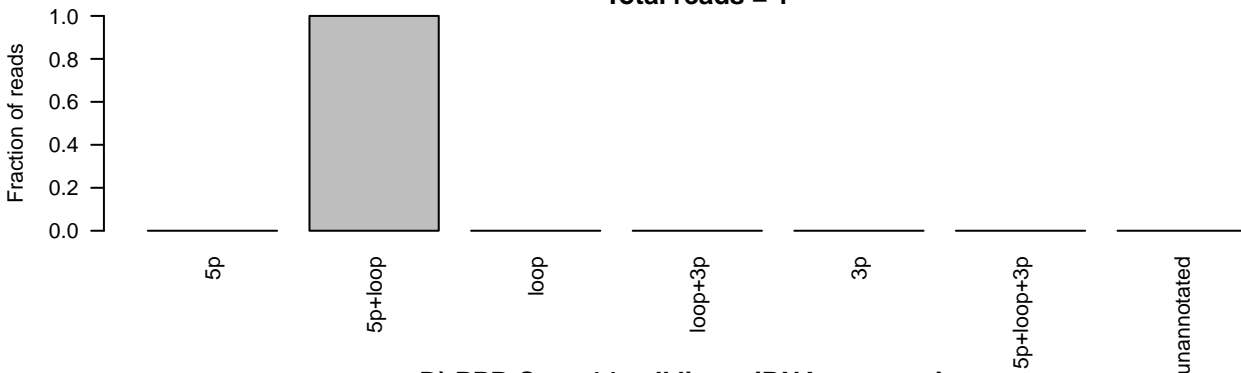

**D) PPB Case 14 cell line miRNA sequencing**  
ID=MI0001518\_1;accession\_number=MI0001518;Name=hsa-mir-18b  
Total reads = 0



**B) Normal fibroblast miRNA sequencing**  
ID=MI0003686\_1;accession\_number=MI0003686;Name=hsa-mir-542  
Total reads = 1

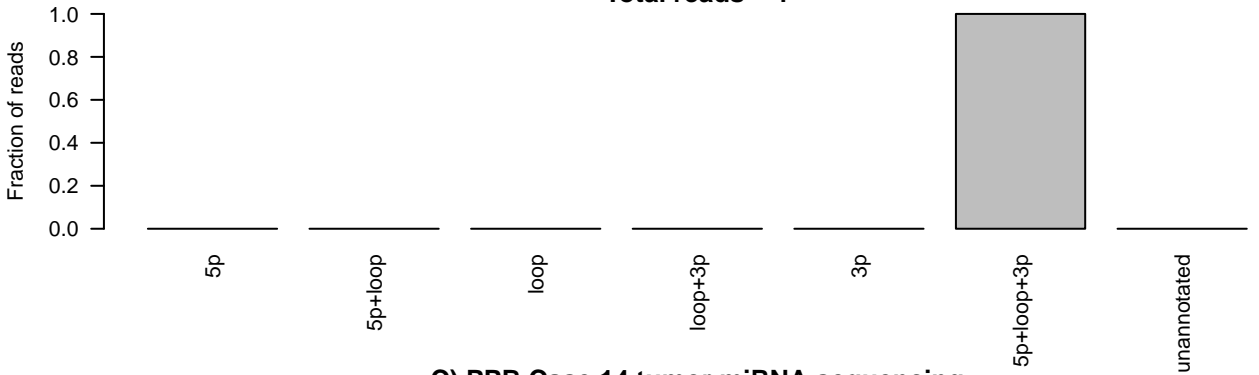

**C) PPB Case 14 tumor miRNA sequencing**  
ID=MI0003686\_1;accession\_number=MI0003686;Name=hsa-mir-542  
Total reads = 7

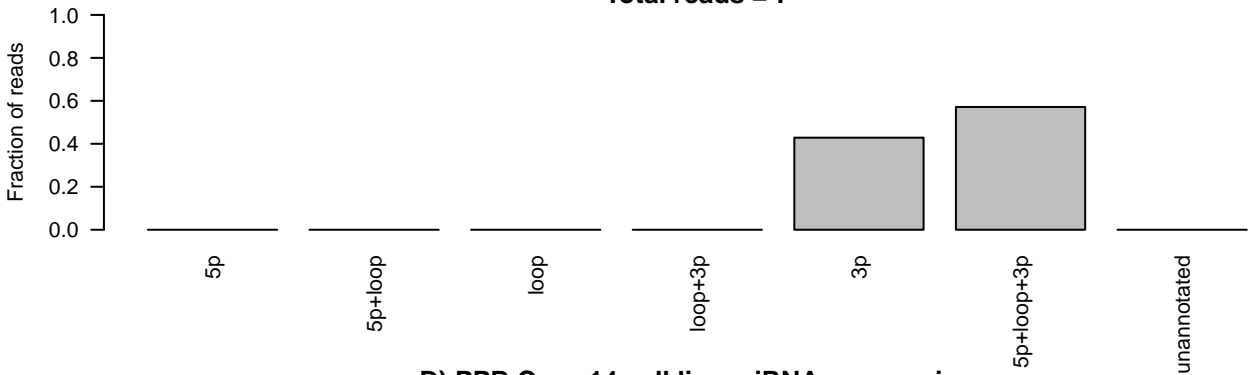

**D) PPB Case 14 cell line miRNA sequencing**  
ID=MI0003686\_1;accession\_number=MI0003686;Name=hsa-mir-542  
Total reads = 4

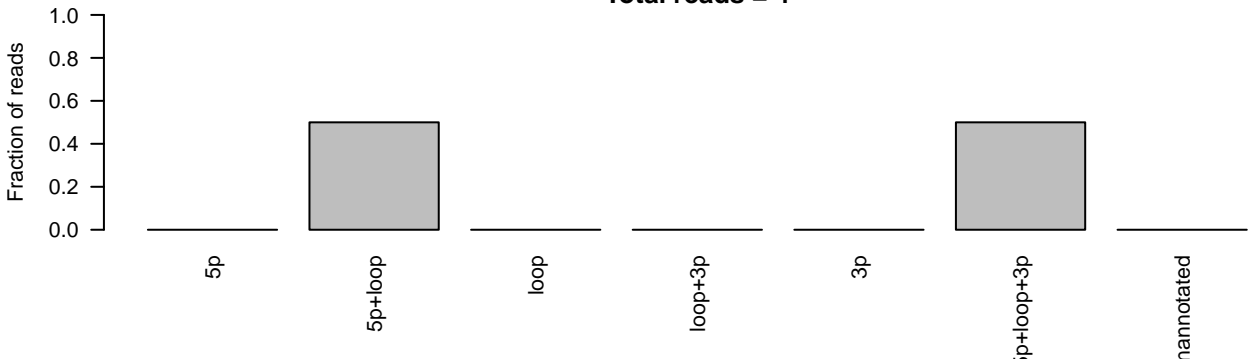

**B) Normal fibroblast miRNA sequencing**  
ID=MI0001733\_1;accession\_number=MI0001733;Name=hsa-mir-452  
Total reads = 1



**C) PPB Case 14 tumor miRNA sequencing**  
ID=MI0001733\_1;accession\_number=MI0001733;Name=hsa-mir-452  
Total reads = 9

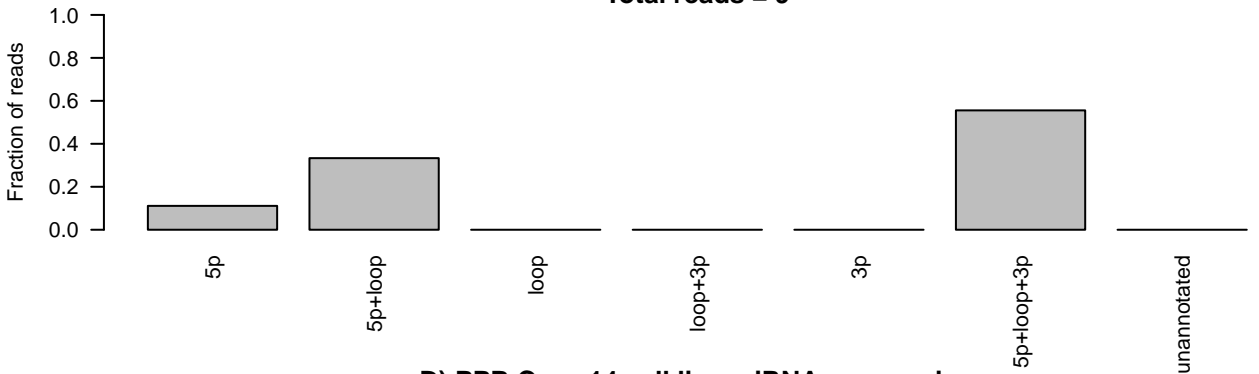

**D) PPB Case 14 cell line miRNA sequencing**  
ID=MI0001733\_1;accession\_number=MI0001733;Name=hsa-mir-452  
Total reads = 8

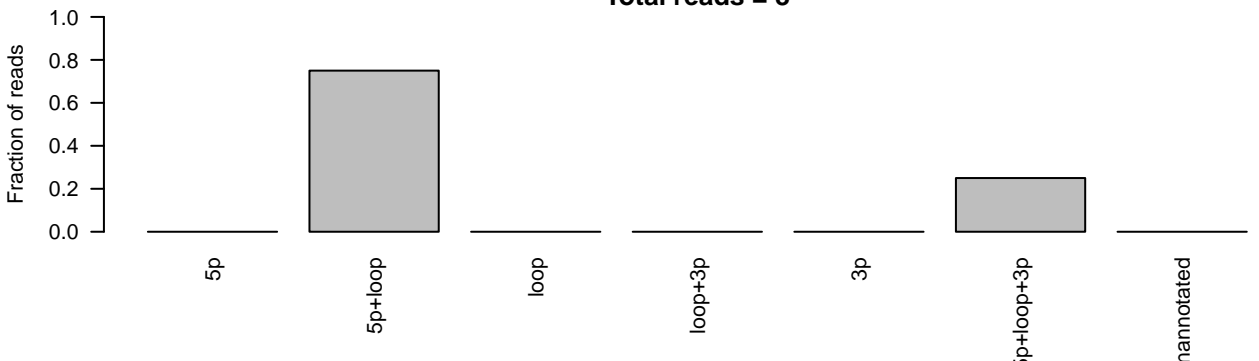

**B) Normal fibroblast miRNA sequencing**  
ID=MI0006363\_1;accession\_number=MI0006363;Name=hsa-mir-1302-2  
Total reads = 0



**C) PPB Case 14 tumor miRNA sequencing**  
ID=MI0006363\_1;accession\_number=MI0006363;Name=hsa-mir-1302-2  
Total reads = 0



**D) PPB Case 14 cell line miRNA sequencing**  
ID=MI0006363\_1;accession\_number=MI0006363;Name=hsa-mir-1302-2  
Total reads = 0





**B) Normal fibroblast miRNA sequencing**  
ID=MI0000342\_1;accession\_number=MI0000342;Name=hsa-mir-200b  
Total reads = 0



**C) PPB Case 14 tumor miRNA sequencing**  
ID=MI0000342\_1;accession\_number=MI0000342;Name=hsa-mir-200b  
Total reads = 0



**D) PPB Case 14 cell line miRNA sequencing**  
ID=MI0000342\_1;accession\_number=MI0000342;Name=hsa-mir-200b  
Total reads = 0



**B) Normal fibroblast miRNA sequencing**  
ID=MI0000737\_1;accession\_number=MI0000737;Name=hsa-mir-200a  
Total reads = 0

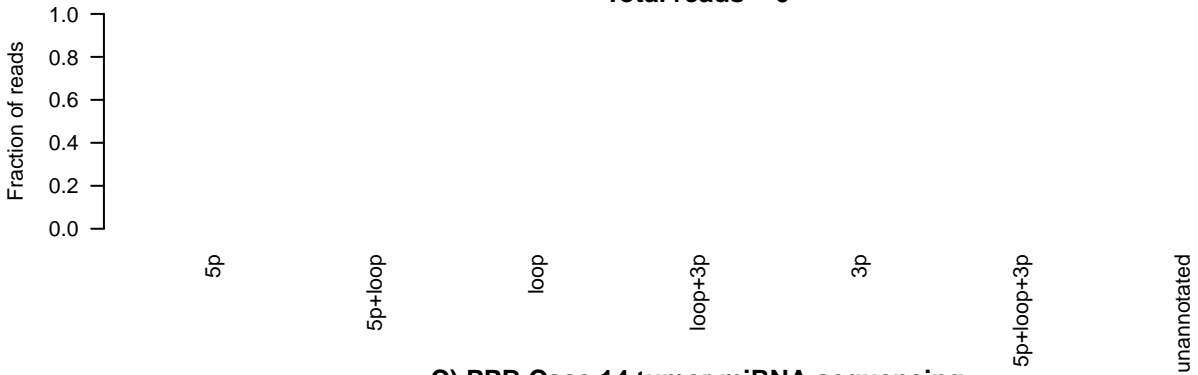

**C) PPB Case 14 tumor miRNA sequencing**  
ID=MI0000737\_1;accession\_number=MI0000737;Name=hsa-mir-200a  
Total reads = 0

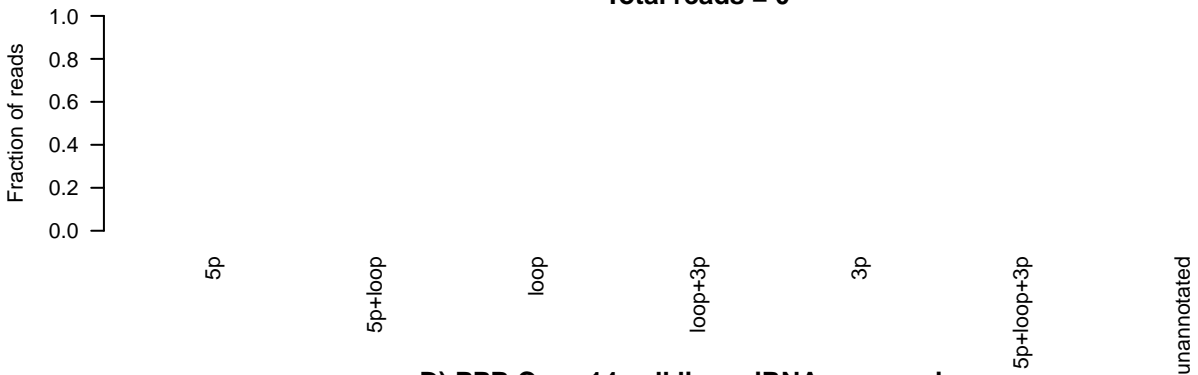

**D) PPB Case 14 cell line miRNA sequencing**  
ID=MI0000737\_1;accession\_number=MI0000737;Name=hsa-mir-200a  
Total reads = 0

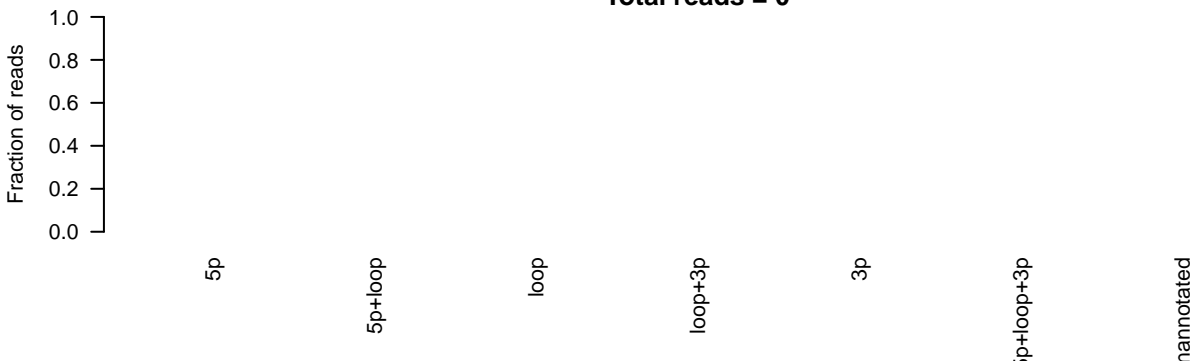

**B) Normal fibroblast miRNA sequencing**  
ID=MI0001641\_1;accession\_number=MI0001641;Name=hsa-mir-429  
Total reads = 0



**C) PPB Case 14 tumor miRNA sequencing**  
ID=MI0001641\_1;accession\_number=MI0001641;Name=hsa-mir-429  
Total reads = 0



**D) PPB Case 14 cell line miRNA sequencing**  
ID=MI0001641\_1;accession\_number=MI0001641;Name=hsa-mir-429  
Total reads = 0



**B) Normal fibroblast miRNA sequencing**  
ID=MI0015861\_1;accession\_number=MI0015861;Name=hsa-mir-4251  
Total reads = 0

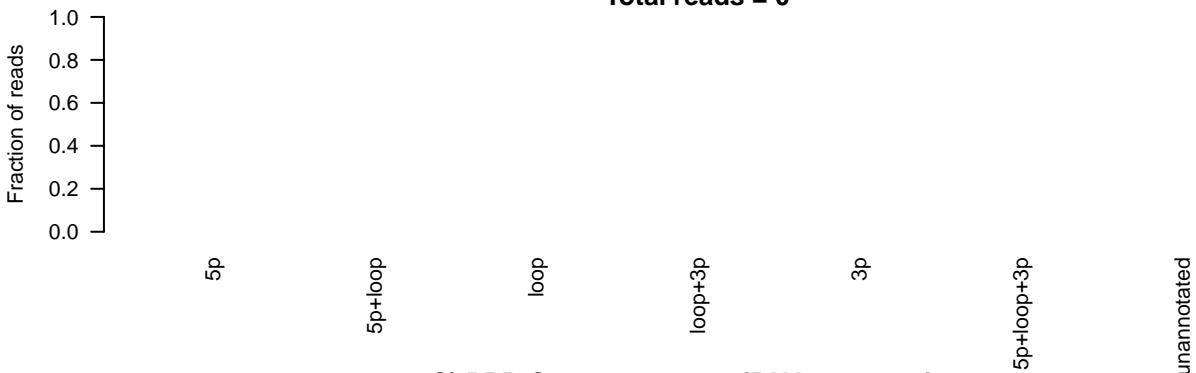

**C) PPB Case 14 tumor miRNA sequencing**  
ID=MI0015861\_1;accession\_number=MI0015861;Name=hsa-mir-4251  
Total reads = 0



**D) PPB Case 14 cell line miRNA sequencing**  
ID=MI0015861\_1;accession\_number=MI0015861;Name=hsa-mir-4251  
Total reads = 0



**B) Normal fibroblast miRNA sequencing**  
ID=MI0003556\_1;accession\_number=MI0003556;Name=hsa-mir-551a  
Total reads = 0



**C) PPB Case 14 tumor miRNA sequencing**  
ID=MI0003556\_1;accession\_number=MI0003556;Name=hsa-mir-551a  
Total reads = 0

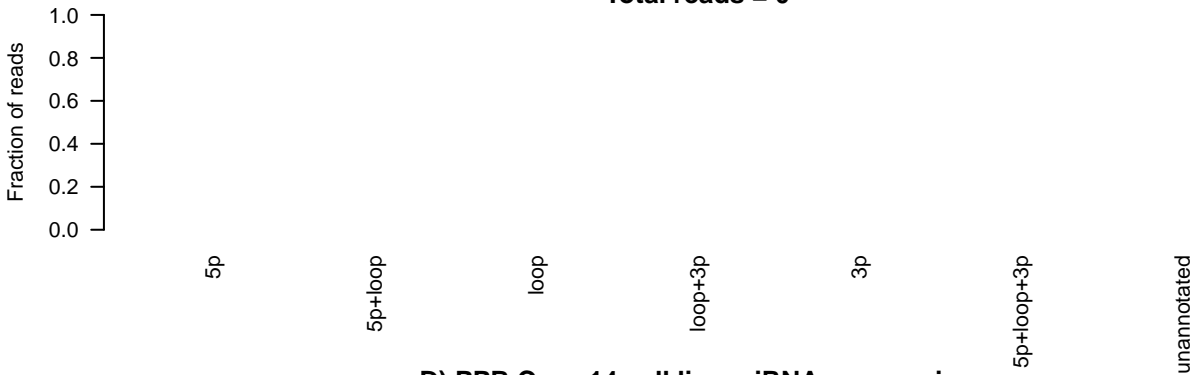

**D) PPB Case 14 cell line miRNA sequencing**  
ID=MI0003556\_1;accession\_number=MI0003556;Name=hsa-mir-551a  
Total reads = 0



**B) Normal fibroblast miRNA sequencing**  
ID=MI0016753\_1;accession\_number=MI0016753;Name=hsa-mir-4417  
Total reads = 0



**C) PPB Case 14 tumor miRNA sequencing**  
ID=MI0016753\_1;accession\_number=MI0016753;Name=hsa-mir-4417  
Total reads = 0

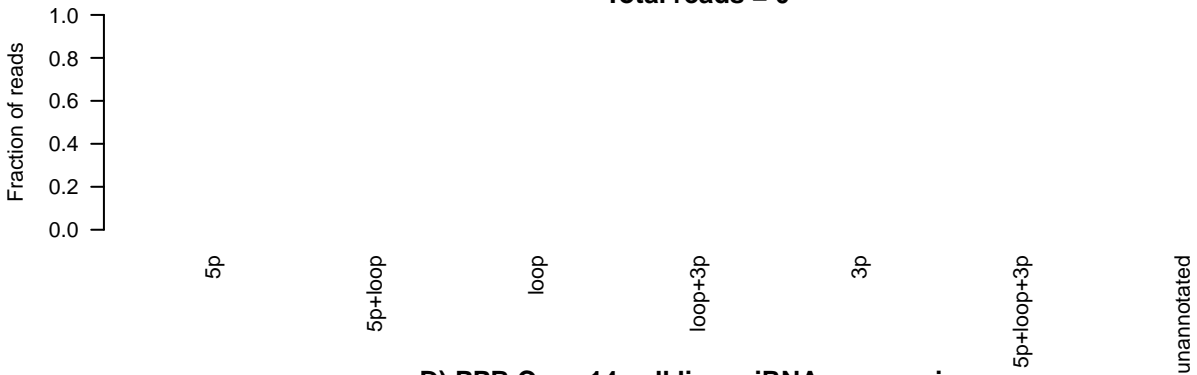

**D) PPB Case 14 cell line miRNA sequencing**  
ID=MI0016753\_1;accession\_number=MI0016753;Name=hsa-mir-4417  
Total reads = 0

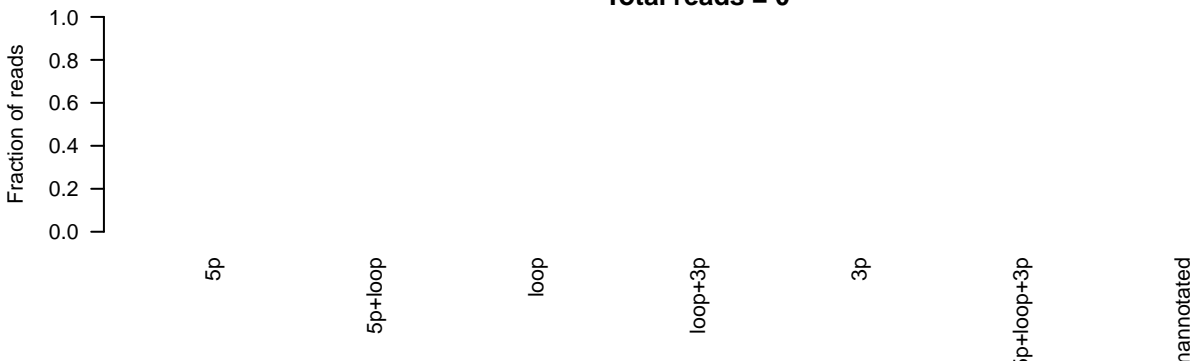

**B) Normal fibroblast miRNA sequencing**  
ID=MI0017322\_1;accession\_number=MI0017322;Name=hsa-mir-4689  
Total reads = 0



**C) PPB Case 14 tumor miRNA sequencing**  
ID=MI0017322\_1;accession\_number=MI0017322;Name=hsa-mir-4689  
Total reads = 0



**D) PPB Case 14 cell line miRNA sequencing**  
ID=MI0017322\_1;accession\_number=MI0017322;Name=hsa-mir-4689  
Total reads = 0



**B) Normal fibroblast miRNA sequencing**  
ID=MI0015864\_1;accession\_number=MI0015864;Name=hsa-mir-4252  
Total reads = 0



**C) PPB Case 14 tumor miRNA sequencing**  
ID=MI0015864\_1;accession\_number=MI0015864;Name=hsa-mir-4252  
Total reads = 0



**D) PPB Case 14 cell line miRNA sequencing**  
ID=MI0015864\_1;accession\_number=MI0015864;Name=hsa-mir-4252  
Total reads = 0





**B) Normal fibroblast miRNA sequencing**  
ID=MI0019304\_1;accession\_number=MI0019304;Name=hsa-mir-5697  
Total reads = 0



**C) PPB Case 14 tumor miRNA sequencing**  
ID=MI0019304\_1;accession\_number=MI0019304;Name=hsa-mir-5697  
Total reads = 0



**D) PPB Case 14 cell line miRNA sequencing**  
ID=MI0019304\_1;accession\_number=MI0019304;Name=hsa-mir-5697  
Total reads = 0



**B) Normal fibroblast miRNA sequencing**  
ID=MI0014254\_1;accession\_number=MI0014254;Name=hsa-mir-1273d  
Total reads = 0



**C) PPB Case 14 tumor miRNA sequencing**  
ID=MI0014254\_1;accession\_number=MI0014254;Name=hsa-mir-1273d  
Total reads = 0



**D) PPB Case 14 cell line miRNA sequencing**  
ID=MI0014254\_1;accession\_number=MI0014254;Name=hsa-mir-1273d  
Total reads = 0



**B) Normal fibroblast miRNA sequencing**  
ID=MI0017259\_1;accession\_number=MI0017259;Name=hsa-mir-4632  
Total reads = 0



**C) PPB Case 14 tumor miRNA sequencing**  
ID=MI0017259\_1;accession\_number=MI0017259;Name=hsa-mir-4632  
Total reads = 0



**D) PPB Case 14 cell line miRNA sequencing**  
ID=MI0017259\_1;accession\_number=MI0017259;Name=hsa-mir-4632  
Total reads = 0



**B) Normal fibroblast miRNA sequencing**  
ID=MI0016076\_1;accession\_number=MI0016076;Name=hsa-mir-3675  
Total reads = 0



**C) PPB Case 14 tumor miRNA sequencing**  
ID=MI0016076\_1;accession\_number=MI0016076;Name=hsa-mir-3675  
Total reads = 0



**D) PPB Case 14 cell line miRNA sequencing**  
ID=MI0016076\_1;accession\_number=MI0016076;Name=hsa-mir-3675  
Total reads = 0



**B) Normal fibroblast miRNA sequencing**  
ID=MI0016990\_1;accession\_number=MI0016990;Name=hsa-mir-3972  
Total reads = 0

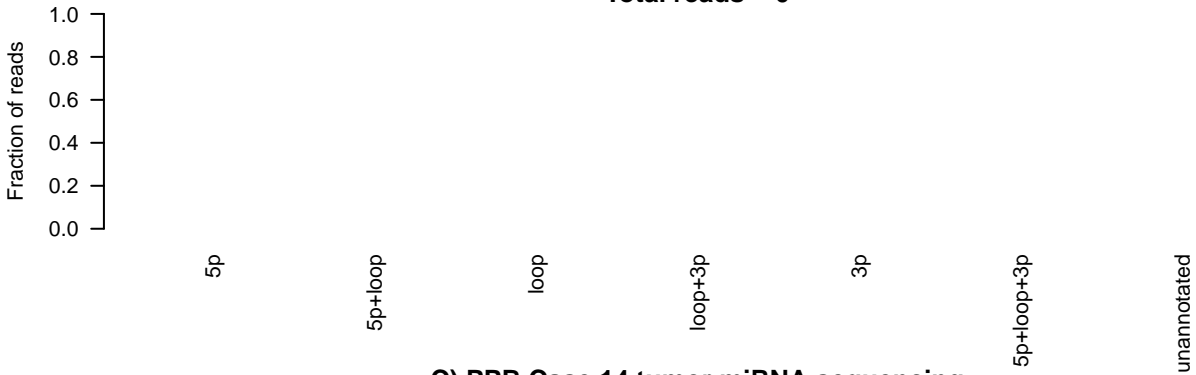

**C) PPB Case 14 tumor miRNA sequencing**  
ID=MI0016990\_1;accession\_number=MI0016990;Name=hsa-mir-3972  
Total reads = 0

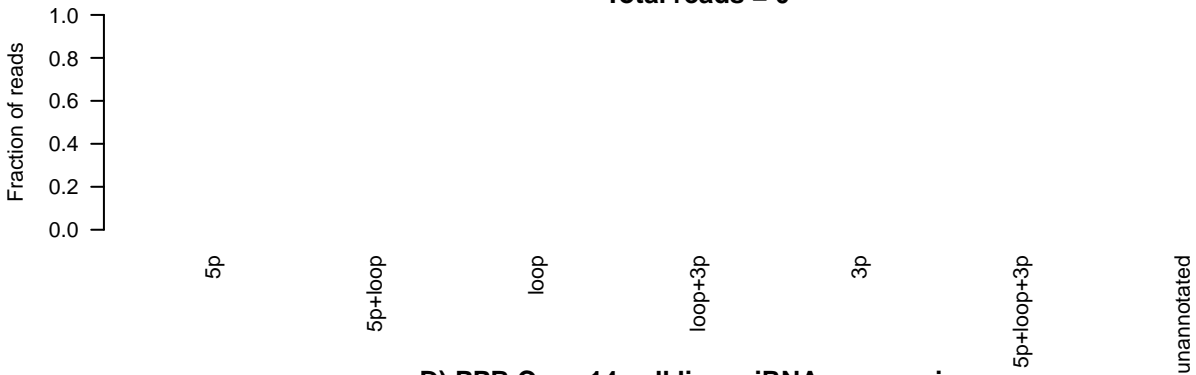

**D) PPB Case 14 cell line miRNA sequencing**  
ID=MI0016990\_1;accession\_number=MI0016990;Name=hsa-mir-3972  
Total reads = 0



**B) Normal fibroblast miRNA sequencing**  
ID=MI0017328\_1;accession\_number=MI0017328;Name=hsa-mir-4695  
Total reads = 0



**C) PPB Case 14 tumor miRNA sequencing**  
ID=MI0017328\_1;accession\_number=MI0017328;Name=hsa-mir-4695  
Total reads = 0



**D) PPB Case 14 cell line miRNA sequencing**  
ID=MI0017328\_1;accession\_number=MI0017328;Name=hsa-mir-4695  
Total reads = 0



**B) Normal fibroblast miRNA sequencing**  
ID=MI0006352\_1;accession\_number=MI0006352;Name=hsa-mir-1290  
Total reads = 0



**C) PPB Case 14 tumor miRNA sequencing**  
ID=MI0006352\_1;accession\_number=MI0006352;Name=hsa-mir-1290  
Total reads = 0



**D) PPB Case 14 cell line miRNA sequencing**  
ID=MI0006352\_1;accession\_number=MI0006352;Name=hsa-mir-1290  
Total reads = 0



**B) Normal fibroblast miRNA sequencing**  
ID=MI0020361\_1;accession\_number=MI0020361;Name=hsa-mir-6084  
Total reads = 0



**C) PPB Case 14 tumor miRNA sequencing**  
ID=MI0020361\_1;accession\_number=MI0020361;Name=hsa-mir-6084  
Total reads = 0



**D) PPB Case 14 cell line miRNA sequencing**  
ID=MI0020361\_1;accession\_number=MI0020361;Name=hsa-mir-6084  
Total reads = 0





**B) Normal fibroblast miRNA sequencing**  
ID=MI0006390\_1;accession\_number=MI0006390;Name=hsa-mir-1256  
Total reads = 0



**C) PPB Case 14 tumor miRNA sequencing**  
ID=MI0006390\_1;accession\_number=MI0006390;Name=hsa-mir-1256  
Total reads = 0



**D) PPB Case 14 cell line miRNA sequencing**  
ID=MI0006390\_1;accession\_number=MI0006390;Name=hsa-mir-1256  
Total reads = 0



**B) Normal fibroblast miRNA sequencing**  
ID=MI0016754\_1;accession\_number=MI0016754;Name=hsa-mir-4418  
Total reads = 0



**C) PPB Case 14 tumor miRNA sequencing**  
ID=MI0016754\_1;accession\_number=MI0016754;Name=hsa-mir-4418  
Total reads = 0



**D) PPB Case 14 cell line miRNA sequencing**  
ID=MI0016754\_1;accession\_number=MI0016754;Name=hsa-mir-4418  
Total reads = 0



**B) Normal fibroblast miRNA sequencing**  
ID=MI0021271\_1;accession\_number=MI0021271;Name=hsa-mir-6127  
Total reads = 0



**C) PPB Case 14 tumor miRNA sequencing**  
ID=MI0021271\_1;accession\_number=MI0021271;Name=hsa-mir-6127  
Total reads = 0



**D) PPB Case 14 cell line miRNA sequencing**  
ID=MI0021271\_1;accession\_number=MI0021271;Name=hsa-mir-6127  
Total reads = 0



**B) Normal fibroblast miRNA sequencing**  
ID=MI0017316\_1;accession\_number=MI0017316;Name=hsa-mir-4684  
Total reads = 0



**C) PPB Case 14 tumor miRNA sequencing**  
ID=MI0017316\_1;accession\_number=MI0017316;Name=hsa-mir-4684  
Total reads = 0



**D) PPB Case 14 cell line miRNA sequencing**  
ID=MI0017316\_1;accession\_number=MI0017316;Name=hsa-mir-4684  
Total reads = 0



**B) Normal fibroblast miRNA sequencing**  
ID=MI0015860\_1;accession\_number=MI0015860;Name=hsa-mir-4253  
Total reads = 0



**C) PPB Case 14 tumor miRNA sequencing**  
ID=MI0015860\_1;accession\_number=MI0015860;Name=hsa-mir-4253  
Total reads = 0



**D) PPB Case 14 cell line miRNA sequencing**  
ID=MI0015860\_1;accession\_number=MI0015860;Name=hsa-mir-4253  
Total reads = 0



**B) Normal fibroblast miRNA sequencing**  
ID=MI0014127\_1;accession\_number=MI0014127;Name=hsa-mir-3115  
Total reads = 0



**C) PPB Case 14 tumor miRNA sequencing**  
ID=MI0014127\_1;accession\_number=MI0014127;Name=hsa-mir-3115  
Total reads = 0



**D) PPB Case 14 cell line miRNA sequencing**  
ID=MI0014127\_1;accession\_number=MI0014127;Name=hsa-mir-3115  
Total reads = 0



**B) Normal fibroblast miRNA sequencing**  
ID=MI0016755\_1;accession\_number=MI0016755;Name=hsa-mir-4419a  
Total reads = 0



**C) PPB Case 14 tumor miRNA sequencing**  
ID=MI0016755\_1;accession\_number=MI0016755;Name=hsa-mir-4419a  
Total reads = 0



**D) PPB Case 14 cell line miRNA sequencing**  
ID=MI0016755\_1;accession\_number=MI0016755;Name=hsa-mir-4419a  
Total reads = 0



**B) Normal fibroblast miRNA sequencing**  
ID=MI0016756\_1;accession\_number=MI0016756;Name=hsa-mir-378f  
Total reads = 0



**C) PPB Case 14 tumor miRNA sequencing**  
ID=MI0016756\_1;accession\_number=MI0016756;Name=hsa-mir-378f  
Total reads = 0



**D) PPB Case 14 cell line miRNA sequencing**  
ID=MI0016756\_1;accession\_number=MI0016756;Name=hsa-mir-378f  
Total reads = 0





**B) Normal fibroblast miRNA sequencing**  
ID=MI0016764\_1;accession\_number=MI0016764;Name=hsa-mir-4425  
Total reads = 0



**C) PPB Case 14 tumor miRNA sequencing**  
ID=MI0016764\_1;accession\_number=MI0016764;Name=hsa-mir-4425  
Total reads = 0



**D) PPB Case 14 cell line miRNA sequencing**  
ID=MI0016764\_1;accession\_number=MI0016764;Name=hsa-mir-4425  
Total reads = 0



**B) Normal fibroblast miRNA sequencing**  
ID=MI0016423\_1;accession\_number=MI0016423;Name=hsa-mir-3917  
Total reads = 0



**C) PPB Case 14 tumor miRNA sequencing**  
ID=MI0016423\_1;accession\_number=MI0016423;Name=hsa-mir-3917  
Total reads = 0



**D) PPB Case 14 cell line miRNA sequencing**  
ID=MI0016423\_1;accession\_number=MI0016423;Name=hsa-mir-3917  
Total reads = 0



**B) Normal fibroblast miRNA sequencing**  
ID=MI0009986\_1;accession\_number=MI0009986;Name=hsa-mir-1976  
Total reads = 0



**C) PPB Case 14 tumor miRNA sequencing**  
ID=MI0009986\_1;accession\_number=MI0009986;Name=hsa-mir-1976  
Total reads = 0



**D) PPB Case 14 cell line miRNA sequencing**  
ID=MI0009986\_1;accession\_number=MI0009986;Name=hsa-mir-1976  
Total reads = 0



**B) Normal fibroblast miRNA sequencing**  
ID=MI0016757\_1;accession\_number=MI0016757;Name=hsa-mir-4420  
Total reads = 0



**C) PPB Case 14 tumor miRNA sequencing**  
ID=MI0016757\_1;accession\_number=MI0016757;Name=hsa-mir-4420  
Total reads = 0



**D) PPB Case 14 cell line miRNA sequencing**  
ID=MI0016757\_1;accession\_number=MI0016757;Name=hsa-mir-4420  
Total reads = 0



**B) Normal fibroblast miRNA sequencing**  
ID=MI0015862\_1;accession\_number=MI0015862;Name=hsa-mir-4254  
Total reads = 0



**C) PPB Case 14 tumor miRNA sequencing**  
ID=MI0015862\_1;accession\_number=MI0015862;Name=hsa-mir-4254  
Total reads = 0



**D) PPB Case 14 cell line miRNA sequencing**  
ID=MI0015862\_1;accession\_number=MI0015862;Name=hsa-mir-4254  
Total reads = 0



**B) Normal fibroblast miRNA sequencing**  
ID=MI0019142\_1;accession\_number=MI0019142;Name=hsa-mir-5585  
Total reads = 0



**C) PPB Case 14 tumor miRNA sequencing**  
ID=MI0019142\_1;accession\_number=MI0019142;Name=hsa-mir-5585  
Total reads = 0



**D) PPB Case 14 cell line miRNA sequencing**  
ID=MI0019142\_1;accession\_number=MI0019142;Name=hsa-mir-5585  
Total reads = 0



**B) Normal fibroblast miRNA sequencing**  
ID=MI0015995\_1;accession\_number=MI0015995;Name=hsa-mir-3605  
Total reads = 0



**C) PPB Case 14 tumor miRNA sequencing**  
ID=MI0015995\_1;accession\_number=MI0015995;Name=hsa-mir-3605  
Total reads = 0



**D) PPB Case 14 cell line miRNA sequencing**  
ID=MI0015995\_1;accession\_number=MI0015995;Name=hsa-mir-3605  
Total reads = 1



**B) Normal fibroblast miRNA sequencing**  
ID=MI0003557\_1;accession\_number=MI0003557;Name=hsa-mir-552  
Total reads = 0



**C) PPB Case 14 tumor miRNA sequencing**  
ID=MI0003557\_1;accession\_number=MI0003557;Name=hsa-mir-552  
Total reads = 0



**D) PPB Case 14 cell line miRNA sequencing**  
ID=MI0003557\_1;accession\_number=MI0003557;Name=hsa-mir-552  
Total reads = 0





**B) Normal fibroblast miRNA sequencing**  
ID=MI0015863\_1;accession\_number=MI0015863;Name=hsa-mir-4255  
Total reads = 0



**C) PPB Case 14 tumor miRNA sequencing**  
ID=MI0015863\_1;accession\_number=MI0015863;Name=hsa-mir-4255  
Total reads = 0



**D) PPB Case 14 cell line miRNA sequencing**  
ID=MI0015863\_1;accession\_number=MI0015863;Name=hsa-mir-4255  
Total reads = 0



**B) Normal fibroblast miRNA sequencing**  
ID=MI0019136\_1;accession\_number=MI0019136;Name=hsa-mir-5581  
Total reads = 0



**C) PPB Case 14 tumor miRNA sequencing**  
ID=MI0019136\_1;accession\_number=MI0019136;Name=hsa-mir-5581  
Total reads = 0



**D) PPB Case 14 cell line miRNA sequencing**  
ID=MI0019136\_1;accession\_number=MI0019136;Name=hsa-mir-5581  
Total reads = 0



**B) Normal fibroblast miRNA sequencing**  
ID=MI0016060\_1;accession\_number=MI0016060;Name=hsa-mir-3659  
Total reads = 0



**C) PPB Case 14 tumor miRNA sequencing**  
ID=MI0016060\_1;accession\_number=MI0016060;Name=hsa-mir-3659  
Total reads = 0



**D) PPB Case 14 cell line miRNA sequencing**  
ID=MI0016060\_1;accession\_number=MI0016060;Name=hsa-mir-3659  
Total reads = 0



**B) Normal fibroblast miRNA sequencing**  
ID=MI0020356\_1;accession\_number=MI0020356;Name=hsa-mir-6079  
Total reads = 0



**C) PPB Case 14 tumor miRNA sequencing**  
ID=MI0020356\_1;accession\_number=MI0020356;Name=hsa-mir-6079  
Total reads = 0



**D) PPB Case 14 cell line miRNA sequencing**  
ID=MI0020356\_1;accession\_number=MI0020356;Name=hsa-mir-6079  
Total reads = 0



**B) Normal fibroblast miRNA sequencing**  
ID=MI0019141\_1;accession\_number=MI0019141;Name=hsa-mir-5584  
Total reads = 0



**C) PPB Case 14 tumor miRNA sequencing**  
ID=MI0019141\_1;accession\_number=MI0019141;Name=hsa-mir-5584  
Total reads = 0



**D) PPB Case 14 cell line miRNA sequencing**  
ID=MI0019141\_1;accession\_number=MI0019141;Name=hsa-mir-5584  
Total reads = 0



**B) Normal fibroblast miRNA sequencing**  
ID=MI0016758\_1;accession\_number=MI0016758;Name=hsa-mir-4421  
Total reads = 0



**C) PPB Case 14 tumor miRNA sequencing**  
ID=MI0016758\_1;accession\_number=MI0016758;Name=hsa-mir-4421  
Total reads = 0



**D) PPB Case 14 cell line miRNA sequencing**  
ID=MI0016758\_1;accession\_number=MI0016758;Name=hsa-mir-4421  
Total reads = 0



**B) Normal fibroblast miRNA sequencing**  
ID=MI0003941\_1;accession\_number=MI0003941;Name=hsa-mir-761  
Total reads = 0



**C) PPB Case 14 tumor miRNA sequencing**  
ID=MI0003941\_1;accession\_number=MI0003941;Name=hsa-mir-761  
Total reads = 0



**D) PPB Case 14 cell line miRNA sequencing**  
ID=MI0003941\_1;accession\_number=MI0003941;Name=hsa-mir-761  
Total reads = 0



**B) Normal fibroblast miRNA sequencing**  
ID=MI0018002\_1;accession\_number=MI0018002;Name=hsa-mir-1273f  
Total reads = 0



**C) PPB Case 14 tumor miRNA sequencing**  
ID=MI0018002\_1;accession\_number=MI0018002;Name=hsa-mir-1273f  
Total reads = 0



**D) PPB Case 14 cell line miRNA sequencing**  
ID=MI0018002\_1;accession\_number=MI0018002;Name=hsa-mir-1273f  
Total reads = 0





**B) Normal fibroblast miRNA sequencing**  
ID=MI0018001\_1;accession\_number=MI0018001;Name=hsa-mir-5095  
Total reads = 0



**C) PPB Case 14 tumor miRNA sequencing**  
ID=MI0018001\_1;accession\_number=MI0018001;Name=hsa-mir-5095  
Total reads = 0



**D) PPB Case 14 cell line miRNA sequencing**  
ID=MI0018001\_1;accession\_number=MI0018001;Name=hsa-mir-5095  
Total reads = 0



**B) Normal fibroblast miRNA sequencing**  
ID=MI0018003\_1;accession\_number=MI0018003;Name=hsa-mir-1273g  
Total reads = 0



**C) PPB Case 14 tumor miRNA sequencing**  
ID=MI0018003\_1;accession\_number=MI0018003;Name=hsa-mir-1273g  
Total reads = 0



**D) PPB Case 14 cell line miRNA sequencing**  
ID=MI0018003\_1;accession\_number=MI0018003;Name=hsa-mir-1273g  
Total reads = 0



**B) Normal fibroblast miRNA sequencing**  
ID=MI0017426\_1;accession\_number=MI0017426;Name=hsa-mir-4781  
Total reads = 0

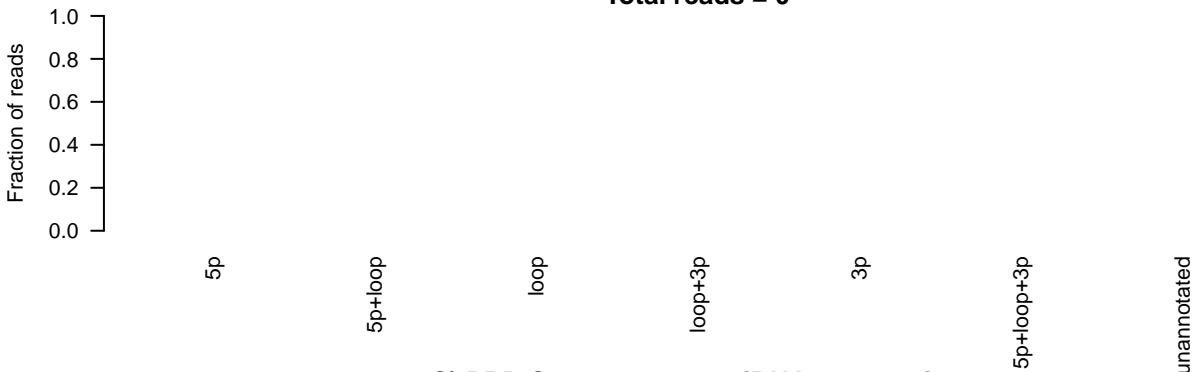

**C) PPB Case 14 tumor miRNA sequencing**  
ID=MI0017426\_1;accession\_number=MI0017426;Name=hsa-mir-4781  
Total reads = 0



**D) PPB Case 14 cell line miRNA sequencing**  
ID=MI0017426\_1;accession\_number=MI0017426;Name=hsa-mir-4781  
Total reads = 0



**B) Normal fibroblast miRNA sequencing**  
ID=MI0016759\_1;accession\_number=MI0016759;Name=hsa-mir-4422  
Total reads = 0



**C) PPB Case 14 tumor miRNA sequencing**  
ID=MI0016759\_1;accession\_number=MI0016759;Name=hsa-mir-4422  
Total reads = 0



**D) PPB Case 14 cell line miRNA sequencing**  
ID=MI0016759\_1;accession\_number=MI0016759;Name=hsa-mir-4422  
Total reads = 0



**B) Normal fibroblast miRNA sequencing**  
ID=MI0017345\_1;accession\_number=MI0017345;Name=hsa-mir-4711  
Total reads = 0



**C) PPB Case 14 tumor miRNA sequencing**  
ID=MI0017345\_1;accession\_number=MI0017345;Name=hsa-mir-4711  
Total reads = 0



**D) PPB Case 14 cell line miRNA sequencing**  
ID=MI0017345\_1;accession\_number=MI0017345;Name=hsa-mir-4711  
Total reads = 0



**B) Normal fibroblast miRNA sequencing**  
ID=MI0014128\_1;accession\_number=MI0014128;Name=hsa-mir-3116-1  
Total reads = 0

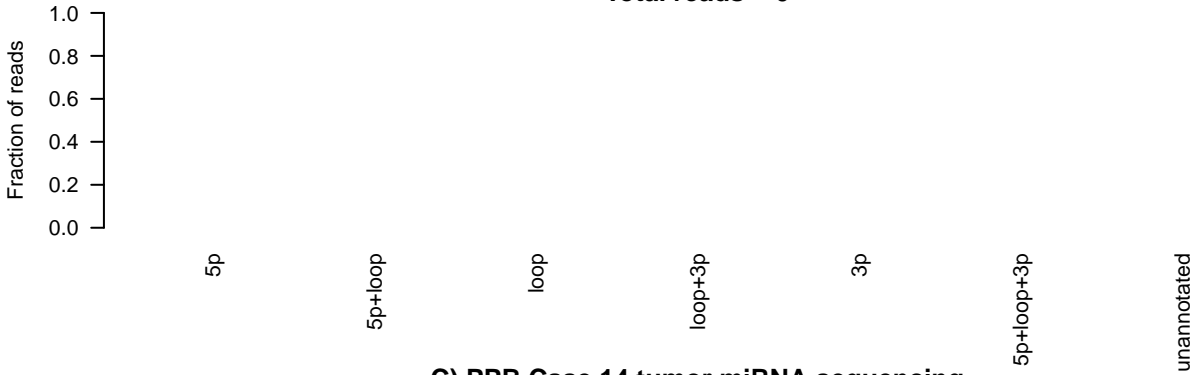

**C) PPB Case 14 tumor miRNA sequencing**  
ID=MI0014128\_1;accession\_number=MI0014128;Name=hsa-mir-3116-1  
Total reads = 0

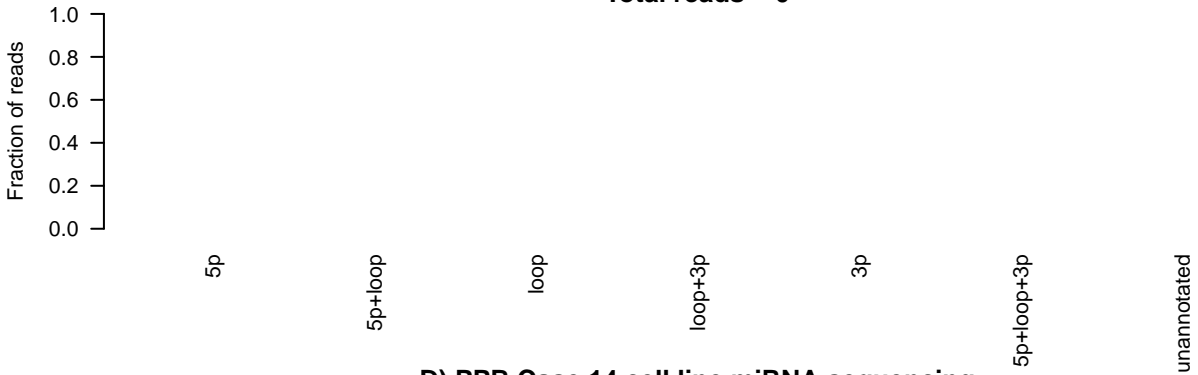

**D) PPB Case 14 cell line miRNA sequencing**  
ID=MI0014128\_1;accession\_number=MI0014128;Name=hsa-mir-3116-1  
Total reads = 0

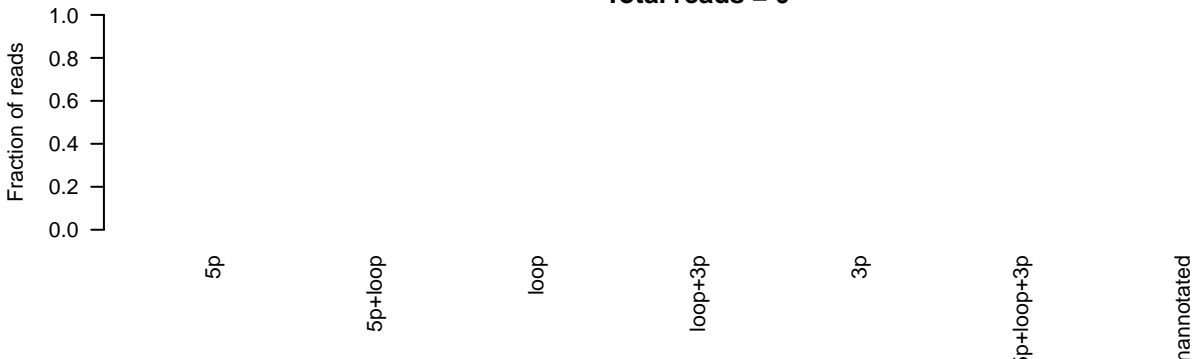

**B) Normal fibroblast miRNA sequencing**  
ID=MI0014129\_1;accession\_number=MI0014129;Name=hsa-mir-3116-2  
Total reads = 0



**C) PPB Case 14 tumor miRNA sequencing**  
ID=MI0014129\_1;accession\_number=MI0014129;Name=hsa-mir-3116-2  
Total reads = 0



**D) PPB Case 14 cell line miRNA sequencing**  
ID=MI0014129\_1;accession\_number=MI0014129;Name=hsa-mir-3116-2  
Total reads = 0



**B) Normal fibroblast miRNA sequencing**  
ID=MI0020345\_1;accession\_number=MI0020345;Name=hsa-mir-6068  
Total reads = 0



**C) PPB Case 14 tumor miRNA sequencing**  
ID=MI0020345\_1;accession\_number=MI0020345;Name=hsa-mir-6068  
Total reads = 0



**D) PPB Case 14 cell line miRNA sequencing**  
ID=MI0020345\_1;accession\_number=MI0020345;Name=hsa-mir-6068  
Total reads = 0





**B) Normal fibroblast miRNA sequencing**  
ID=MI0017441\_1;accession\_number=MI0017441;Name=hsa-mir-4794  
Total reads = 0



**C) PPB Case 14 tumor miRNA sequencing**  
ID=MI0017441\_1;accession\_number=MI0017441;Name=hsa-mir-4794  
Total reads = 0



**D) PPB Case 14 cell line miRNA sequencing**  
ID=MI0017441\_1;accession\_number=MI0017441;Name=hsa-mir-4794  
Total reads = 0



**B) Normal fibroblast miRNA sequencing**  
ID=MI0016072\_1;accession\_number=MI0016072;Name=hsa-mir-3671  
Total reads = 0



**C) PPB Case 14 tumor miRNA sequencing**  
ID=MI0016072\_1;accession\_number=MI0016072;Name=hsa-mir-3671  
Total reads = 0



**D) PPB Case 14 cell line miRNA sequencing**  
ID=MI0016072\_1;accession\_number=MI0016072;Name=hsa-mir-3671  
Total reads = 0



**B) Normal fibroblast miRNA sequencing**  
ID=MI0006397\_1;accession\_number=MI0006397;Name=hsa-mir-1262  
Total reads = 0



**C) PPB Case 14 tumor miRNA sequencing**  
ID=MI0006397\_1;accession\_number=MI0006397;Name=hsa-mir-1262  
Total reads = 0



**D) PPB Case 14 cell line miRNA sequencing**  
ID=MI0006397\_1;accession\_number=MI0006397;Name=hsa-mir-1262  
Total reads = 0



**B) Normal fibroblast miRNA sequencing**  
ID=MI0000483\_1;accession\_number=MI0000483;Name=hsa-mir-186  
Total reads = 0

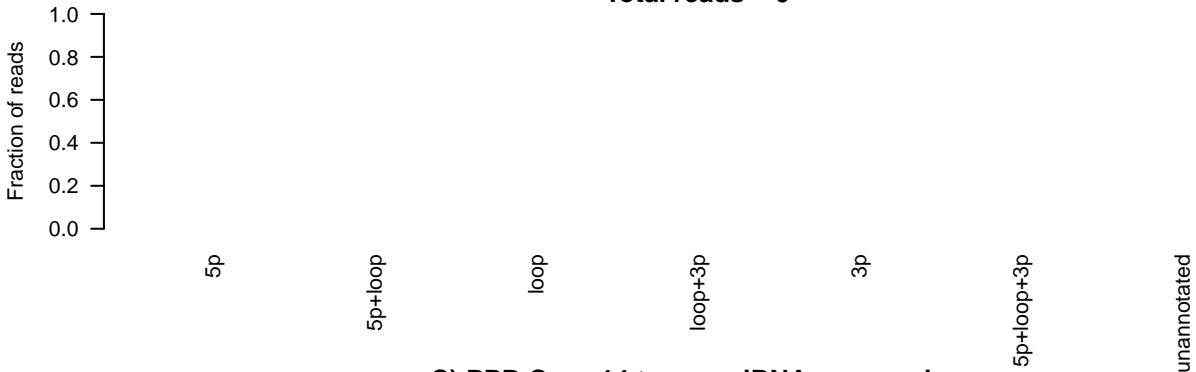

**C) PPB Case 14 tumor miRNA sequencing**  
ID=MI0000483\_1;accession\_number=MI0000483;Name=hsa-mir-186  
Total reads = 0



**D) PPB Case 14 cell line miRNA sequencing**  
ID=MI0000483\_1;accession\_number=MI0000483;Name=hsa-mir-186  
Total reads = 0



**B) Normal fibroblast miRNA sequencing**  
ID=MI0016760\_1;accession\_number=MI0016760;Name=hsa-mir-4423  
Total reads = 0



**C) PPB Case 14 tumor miRNA sequencing**  
ID=MI0016760\_1;accession\_number=MI0016760;Name=hsa-mir-4423  
Total reads = 0



**D) PPB Case 14 cell line miRNA sequencing**  
ID=MI0016760\_1;accession\_number=MI0016760;Name=hsa-mir-4423  
Total reads = 0



**B) Normal fibroblast miRNA sequencing**  
ID=MI0005567\_1;accession\_number=MI0005567;Name=hsa-mir-760  
Total reads = 0



**C) PPB Case 14 tumor miRNA sequencing**  
ID=MI0005567\_1;accession\_number=MI0005567;Name=hsa-mir-760  
Total reads = 0



**D) PPB Case 14 cell line miRNA sequencing**  
ID=MI0005567\_1;accession\_number=MI0005567;Name=hsa-mir-760  
Total reads = 0



**B) Normal fibroblast miRNA sequencing**  
ID=MI0016761\_1;accession\_number=MI0016761;Name=hsa-mir-378g  
Total reads = 0



**C) PPB Case 14 tumor miRNA sequencing**  
ID=MI0016761\_1;accession\_number=MI0016761;Name=hsa-mir-378g  
Total reads = 0



**D) PPB Case 14 cell line miRNA sequencing**  
ID=MI0016761\_1;accession\_number=MI0016761;Name=hsa-mir-378g  
Total reads = 0



**B) Normal fibroblast miRNA sequencing**  
ID=MI0012063\_1;accession\_number=MI0012063;Name=hsa-mir-2682  
Total reads = 0



**C) PPB Case 14 tumor miRNA sequencing**  
ID=MI0012063\_1;accession\_number=MI0012063;Name=hsa-mir-2682  
Total reads = 0



**D) PPB Case 14 cell line miRNA sequencing**  
ID=MI0012063\_1;accession\_number=MI0012063;Name=hsa-mir-2682  
Total reads = 0





**B) Normal fibroblast miRNA sequencing**  
ID=MI0003558\_1;accession\_number=MI0003558;Name=hsa-mir-553  
Total reads = 0



**C) PPB Case 14 tumor miRNA sequencing**  
ID=MI0003558\_1;accession\_number=MI0003558;Name=hsa-mir-553  
Total reads = 0



**D) PPB Case 14 cell line miRNA sequencing**  
ID=MI0003558\_1;accession\_number=MI0003558;Name=hsa-mir-553  
Total reads = 0



**B) Normal fibroblast miRNA sequencing**  
ID=MI0015855\_1;accession\_number=MI0015855;Name=hsa-mir-4256  
Total reads = 0



**C) PPB Case 14 tumor miRNA sequencing**  
ID=MI0015855\_1;accession\_number=MI0015855;Name=hsa-mir-4256  
Total reads = 0



**D) PPB Case 14 cell line miRNA sequencing**  
ID=MI0015855\_1;accession\_number=MI0015855;Name=hsa-mir-4256  
Total reads = 0



**B) Normal fibroblast miRNA sequencing**  
ID=MI0016762\_1;accession\_number=MI0016762;Name=hsa-mir-548ac  
Total reads = 0

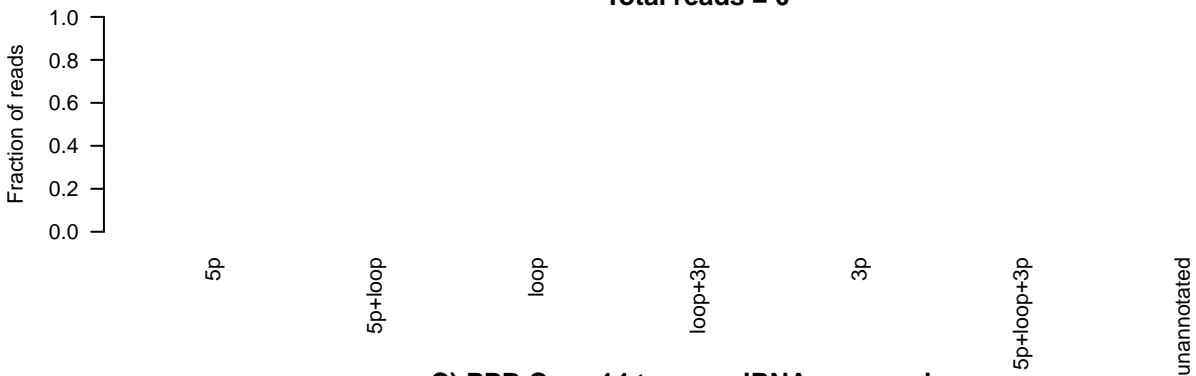

**C) PPB Case 14 tumor miRNA sequencing**  
ID=MI0016762\_1;accession\_number=MI0016762;Name=hsa-mir-548ac  
Total reads = 0



**D) PPB Case 14 cell line miRNA sequencing**  
ID=MI0016762\_1;accession\_number=MI0016762;Name=hsa-mir-548ac  
Total reads = 0



**B) Normal fibroblast miRNA sequencing**  
ID=MI0005767\_1;accession\_number=MI0005767;Name=hsa-mir-942  
Total reads = 0



**C) PPB Case 14 tumor miRNA sequencing**  
ID=MI0005767\_1;accession\_number=MI0005767;Name=hsa-mir-942  
Total reads = 0



**D) PPB Case 14 cell line miRNA sequencing**  
ID=MI0005767\_1;accession\_number=MI0005767;Name=hsa-mir-942  
Total reads = 0



**B) Normal fibroblast miRNA sequencing**  
ID=MI0014131\_1;accession\_number=MI0014131;Name=hsa-mir-3118-1  
Total reads = 0

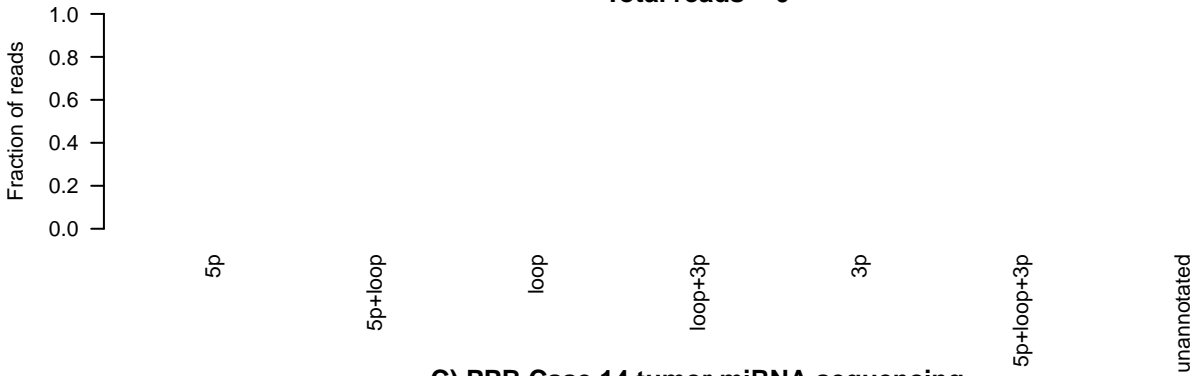

**C) PPB Case 14 tumor miRNA sequencing**  
ID=MI0014131\_1;accession\_number=MI0014131;Name=hsa-mir-3118-1  
Total reads = 0

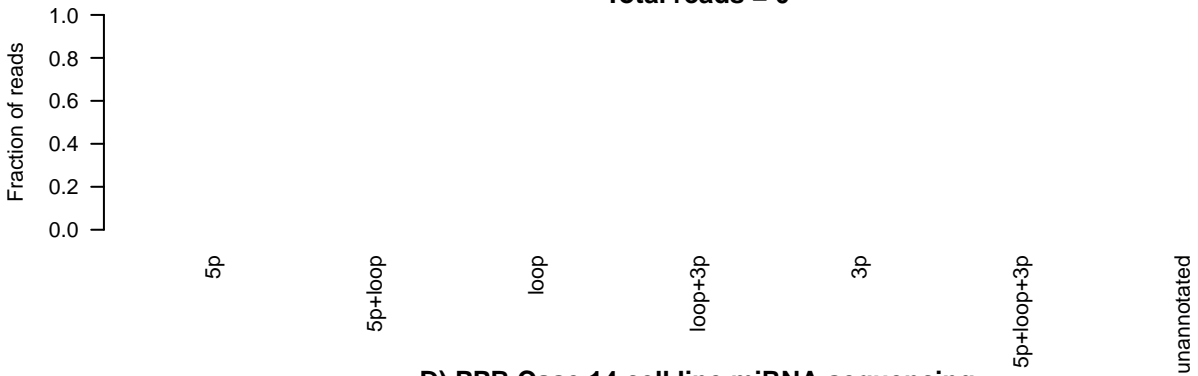

**D) PPB Case 14 cell line miRNA sequencing**  
ID=MI0014131\_1;accession\_number=MI0014131;Name=hsa-mir-3118-1  
Total reads = 0



**B) Normal fibroblast miRNA sequencing**  
ID=MI0014132\_1;accession\_number=MI0014132;Name=hsa-mir-3118-2  
Total reads = 0



**C) PPB Case 14 tumor miRNA sequencing**  
ID=MI0014132\_1;accession\_number=MI0014132;Name=hsa-mir-3118-2  
Total reads = 0



**D) PPB Case 14 cell line miRNA sequencing**  
ID=MI0014132\_1;accession\_number=MI0014132;Name=hsa-mir-3118-2  
Total reads = 0



**B) Normal fibroblast miRNA sequencing**  
ID=MI0014133\_1;accession\_number=MI0014133;Name=hsa-mir-3118-3  
Total reads = 0



**C) PPB Case 14 tumor miRNA sequencing**  
ID=MI0014133\_1;accession\_number=MI0014133;Name=hsa-mir-3118-3  
Total reads = 0



**D) PPB Case 14 cell line miRNA sequencing**  
ID=MI0014133\_1;accession\_number=MI0014133;Name=hsa-mir-3118-3  
Total reads = 0



**B) Normal fibroblast miRNA sequencing**  
ID=MI0020354\_1;accession\_number=MI0020354;Name=hsa-mir-6077-1  
Total reads = 0



**C) PPB Case 14 tumor miRNA sequencing**  
ID=MI0020354\_1;accession\_number=MI0020354;Name=hsa-mir-6077-1  
Total reads = 0



**D) PPB Case 14 cell line miRNA sequencing**  
ID=MI0020354\_1;accession\_number=MI0020354;Name=hsa-mir-6077-1  
Total reads = 0





**B) Normal fibroblast miRNA sequencing**  
ID=MI0017976\_1;accession\_number=MI0017976;Name=hsa-mir-5087  
Total reads = 0



**C) PPB Case 14 tumor miRNA sequencing**  
ID=MI0017976\_1;accession\_number=MI0017976;Name=hsa-mir-5087  
Total reads = 0



**D) PPB Case 14 cell line miRNA sequencing**  
ID=MI0017976\_1;accession\_number=MI0017976;Name=hsa-mir-5087  
Total reads = 0



**B) Normal fibroblast miRNA sequencing**  
ID=MI0023562\_1;accession\_number=MI0023562;Name=hsa-mir-6077-2  
Total reads = 0



**C) PPB Case 14 tumor miRNA sequencing**  
ID=MI0023562\_1;accession\_number=MI0023562;Name=hsa-mir-6077-2  
Total reads = 0



**D) PPB Case 14 cell line miRNA sequencing**  
ID=MI0023562\_1;accession\_number=MI0023562;Name=hsa-mir-6077-2  
Total reads = 0



**B) Normal fibroblast miRNA sequencing**  
ID=MI0015856\_1;accession\_number=MI0015856;Name=hsa-mir-4257  
Total reads = 0



**C) PPB Case 14 tumor miRNA sequencing**  
ID=MI0015856\_1;accession\_number=MI0015856;Name=hsa-mir-4257  
Total reads = 0



**D) PPB Case 14 cell line miRNA sequencing**  
ID=MI0015856\_1;accession\_number=MI0015856;Name=hsa-mir-4257  
Total reads = 0



**B) Normal fibroblast miRNA sequencing**  
ID=MI0003559\_1;accession\_number=MI0003559;Name=hsa-mir-554  
Total reads = 0



**C) PPB Case 14 tumor miRNA sequencing**  
ID=MI0003559\_1;accession\_number=MI0003559;Name=hsa-mir-554  
Total reads = 0



**D) PPB Case 14 cell line miRNA sequencing**  
ID=MI0003559\_1;accession\_number=MI0003559;Name=hsa-mir-554  
Total reads = 0



**B) Normal fibroblast miRNA sequencing**  
ID=MI0019305\_1;accession\_number=MI0019305;Name=hsa-mir-5698  
Total reads = 0



**C) PPB Case 14 tumor miRNA sequencing**  
ID=MI0019305\_1;accession\_number=MI0019305;Name=hsa-mir-5698  
Total reads = 0



**D) PPB Case 14 cell line miRNA sequencing**  
ID=MI0019305\_1;accession\_number=MI0019305;Name=hsa-mir-5698  
Total reads = 0



**B) Normal fibroblast miRNA sequencing**  
ID=MI0005545\_1;accession\_number=MI0005545;Name=hsa-mir-190b  
Total reads = 0



**C) PPB Case 14 tumor miRNA sequencing**  
ID=MI0005545\_1;accession\_number=MI0005545;Name=hsa-mir-190b  
Total reads = 0



**D) PPB Case 14 cell line miRNA sequencing**  
ID=MI0005545\_1;accession\_number=MI0005545;Name=hsa-mir-190b  
Total reads = 0



**B) Normal fibroblast miRNA sequencing**  
ID=MI0015857\_1;accession\_number=MI0015857;Name=hsa-mir-4258  
Total reads = 0



**C) PPB Case 14 tumor miRNA sequencing**  
ID=MI0015857\_1;accession\_number=MI0015857;Name=hsa-mir-4258  
Total reads = 0



**D) PPB Case 14 cell line miRNA sequencing**  
ID=MI0015857\_1;accession\_number=MI0015857;Name=hsa-mir-4258  
Total reads = 0



**B) Normal fibroblast miRNA sequencing**  
ID=MI0003561\_1;accession\_number=MI0003561;Name=hsa-mir-555  
Total reads = 0



**C) PPB Case 14 tumor miRNA sequencing**  
ID=MI0003561\_1;accession\_number=MI0003561;Name=hsa-mir-555  
Total reads = 0



**D) PPB Case 14 cell line miRNA sequencing**  
ID=MI0003561\_1;accession\_number=MI0003561;Name=hsa-mir-555  
Total reads = 0





**B) Normal fibroblast miRNA sequencing**  
ID=MI0000466\_1;accession\_number=MI0000466;Name=hsa-mir-9-1  
Total reads = 0

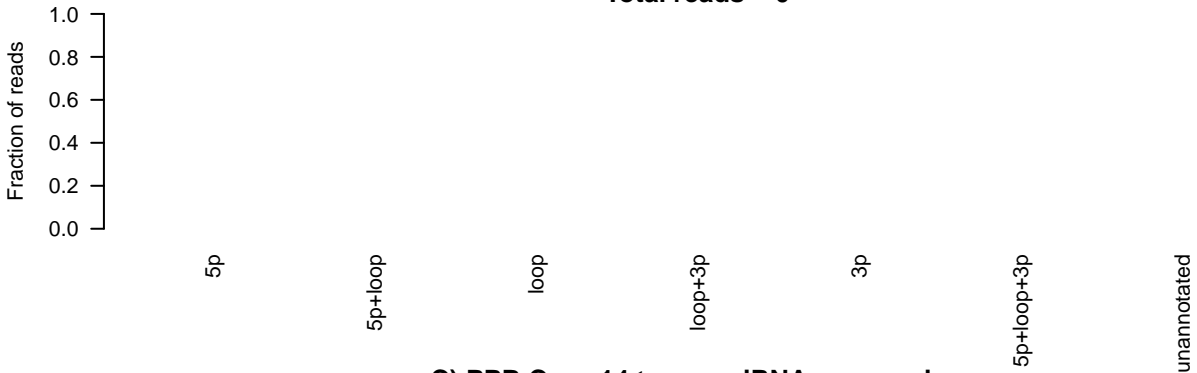

**C) PPB Case 14 tumor miRNA sequencing**  
ID=MI0000466\_1;accession\_number=MI0000466;Name=hsa-mir-9-1  
Total reads = 0

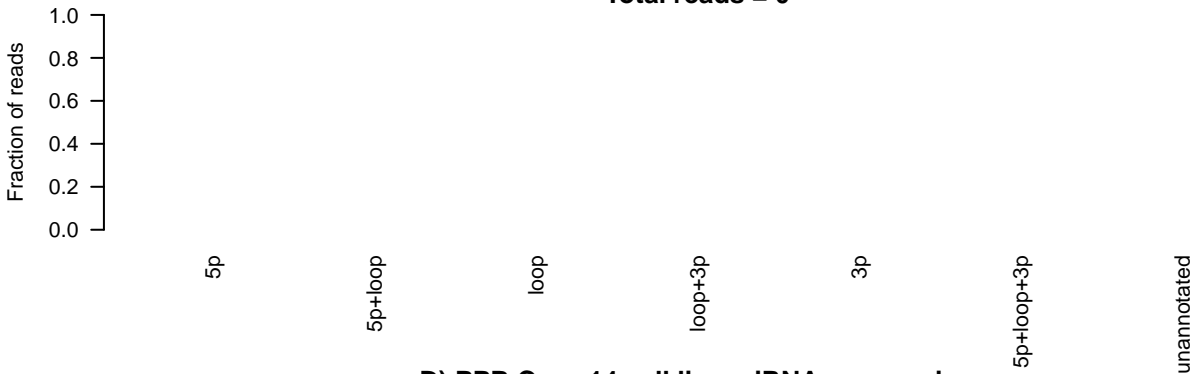

**D) PPB Case 14 cell line miRNA sequencing**  
ID=MI0000466\_1;accession\_number=MI0000466;Name=hsa-mir-9-1  
Total reads = 0



**B) Normal fibroblast miRNA sequencing**  
ID=MI0005116\_1;accession\_number=MI0005116;Name=hsa-mir-765  
Total reads = 0



**C) PPB Case 14 tumor miRNA sequencing**  
ID=MI0005116\_1;accession\_number=MI0005116;Name=hsa-mir-765  
Total reads = 0



**D) PPB Case 14 cell line miRNA sequencing**  
ID=MI0005116\_1;accession\_number=MI0005116;Name=hsa-mir-765  
Total reads = 0



**B) Normal fibroblast miRNA sequencing**  
ID=MI0015858\_1;accession\_number=MI0015858;Name=hsa-mir-4259  
Total reads = 0

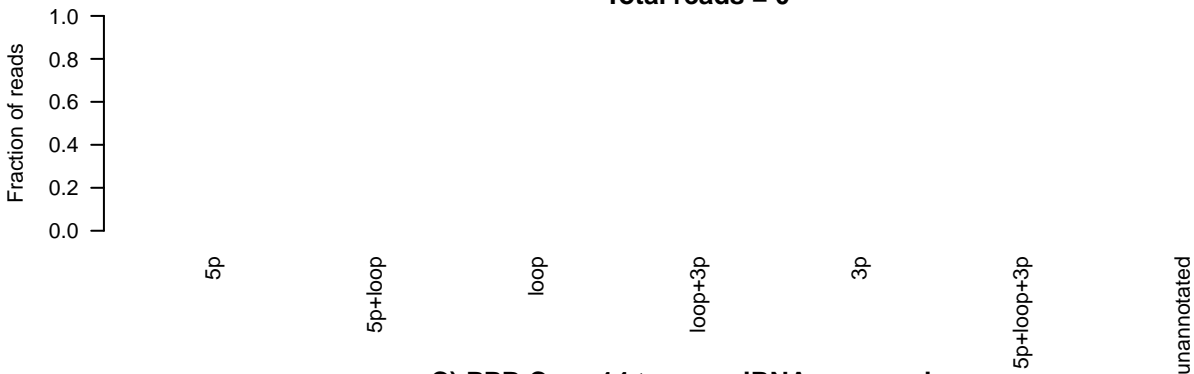

**C) PPB Case 14 tumor miRNA sequencing**  
ID=MI0015858\_1;accession\_number=MI0015858;Name=hsa-mir-4259  
Total reads = 0



**D) PPB Case 14 cell line miRNA sequencing**  
ID=MI0015858\_1;accession\_number=MI0015858;Name=hsa-mir-4259  
Total reads = 0



**B) Normal fibroblast miRNA sequencing**  
ID=MI0018166\_1;accession\_number=MI0018166;Name=hsa-mir-5187  
Total reads = 0



**C) PPB Case 14 tumor miRNA sequencing**  
ID=MI0018166\_1;accession\_number=MI0018166;Name=hsa-mir-5187  
Total reads = 0



**D) PPB Case 14 cell line miRNA sequencing**  
ID=MI0018166\_1;accession\_number=MI0018166;Name=hsa-mir-5187  
Total reads = 0



**B) Normal fibroblast miRNA sequencing**  
ID=MI0017282\_1;accession\_number=MI0017282;Name=hsa-mir-4654  
Total reads = 0



**C) PPB Case 14 tumor miRNA sequencing**  
ID=MI0017282\_1;accession\_number=MI0017282;Name=hsa-mir-4654  
Total reads = 0



**D) PPB Case 14 cell line miRNA sequencing**  
ID=MI0017282\_1;accession\_number=MI0017282;Name=hsa-mir-4654  
Total reads = 0



**B) Normal fibroblast miRNA sequencing**  
ID=MI0003562\_1;accession\_number=MI0003562;Name=hsa-mir-556  
Total reads = 0



**C) PPB Case 14 tumor miRNA sequencing**  
ID=MI0003562\_1;accession\_number=MI0003562;Name=hsa-mir-556  
Total reads = 0



**D) PPB Case 14 cell line miRNA sequencing**  
ID=MI0003562\_1;accession\_number=MI0003562;Name=hsa-mir-556  
Total reads = 0



**B) Normal fibroblast miRNA sequencing**  
ID=MI0016058\_1;accession\_number=MI0016058;Name=hsa-mir-3658  
Total reads = 0



**C) PPB Case 14 tumor miRNA sequencing**  
ID=MI0016058\_1;accession\_number=MI0016058;Name=hsa-mir-3658  
Total reads = 0



**D) PPB Case 14 cell line miRNA sequencing**  
ID=MI0016058\_1;accession\_number=MI0016058;Name=hsa-mir-3658  
Total reads = 0



**B) Normal fibroblast miRNA sequencing**  
ID=MI0005713\_1;accession\_number=MI0005713;Name=hsa-mir-921  
Total reads = 0



**C) PPB Case 14 tumor miRNA sequencing**  
ID=MI0005713\_1;accession\_number=MI0005713;Name=hsa-mir-921  
Total reads = 0



**D) PPB Case 14 cell line miRNA sequencing**  
ID=MI0005713\_1;accession\_number=MI0005713;Name=hsa-mir-921  
Total reads = 0





**B) Normal fibroblast miRNA sequencing**  
ID=MI0006436\_1;accession\_number=MI0006436;Name=hsa-mir-1255b-2  
Total reads = 0



**C) PPB Case 14 tumor miRNA sequencing**  
ID=MI0006436\_1;accession\_number=MI0006436;Name=hsa-mir-1255b-2  
Total reads = 0



**D) PPB Case 14 cell line miRNA sequencing**  
ID=MI0006436\_1;accession\_number=MI0006436;Name=hsa-mir-1255b-2  
Total reads = 0



**B) Normal fibroblast miRNA sequencing**  
ID=MI0003563\_1;accession\_number=MI0003563;Name=hsa-mir-557  
Total reads = 0



**C) PPB Case 14 tumor miRNA sequencing**  
ID=MI0003563\_1;accession\_number=MI0003563;Name=hsa-mir-557  
Total reads = 0



**D) PPB Case 14 cell line miRNA sequencing**  
ID=MI0003563\_1;accession\_number=MI0003563;Name=hsa-mir-557  
Total reads = 0



**B) Normal fibroblast miRNA sequencing**  
ID=MI0014134\_1;accession\_number=MI0014134;Name=hsa-mir-3119-1  
Total reads = 0



**C) PPB Case 14 tumor miRNA sequencing**  
ID=MI0014134\_1;accession\_number=MI0014134;Name=hsa-mir-3119-1  
Total reads = 0



**D) PPB Case 14 cell line miRNA sequencing**  
ID=MI0014134\_1;accession\_number=MI0014134;Name=hsa-mir-3119-1  
Total reads = 0



**B) Normal fibroblast miRNA sequencing**  
ID=MI0014135\_1;accession\_number=MI0014135;Name=hsa-mir-3119-2  
Total reads = 0



**C) PPB Case 14 tumor miRNA sequencing**  
ID=MI0014135\_1;accession\_number=MI0014135;Name=hsa-mir-3119-2  
Total reads = 0



**D) PPB Case 14 cell line miRNA sequencing**  
ID=MI0014135\_1;accession\_number=MI0014135;Name=hsa-mir-3119-2  
Total reads = 0



**B) Normal fibroblast miRNA sequencing**  
ID=MI0006357\_1;accession\_number=MI0006357;Name=hsa-mir-1295a  
Total reads = 0



**C) PPB Case 14 tumor miRNA sequencing**  
ID=MI0006357\_1;accession\_number=MI0006357;Name=hsa-mir-1295a  
Total reads = 0



**D) PPB Case 14 cell line miRNA sequencing**  
ID=MI0006357\_1;accession\_number=MI0006357;Name=hsa-mir-1295a  
Total reads = 0



**B) Normal fibroblast miRNA sequencing**  
ID=MI0019146\_1;accession\_number=MI0019146;Name=hsa-mir-1295b  
Total reads = 0



**C) PPB Case 14 tumor miRNA sequencing**  
ID=MI0019146\_1;accession\_number=MI0019146;Name=hsa-mir-1295b  
Total reads = 0



**D) PPB Case 14 cell line miRNA sequencing**  
ID=MI0019146\_1;accession\_number=MI0019146;Name=hsa-mir-1295b  
Total reads = 0



**B) Normal fibroblast miRNA sequencing**  
ID=MI0003123\_1;accession\_number=MI0003123;Name=hsa-mir-488  
Total reads = 0



**C) PPB Case 14 tumor miRNA sequencing**  
ID=MI0003123\_1;accession\_number=MI0003123;Name=hsa-mir-488  
Total reads = 0



**D) PPB Case 14 cell line miRNA sequencing**  
ID=MI0003123\_1;accession\_number=MI0003123;Name=hsa-mir-488  
Total reads = 0



**B) Normal fibroblast miRNA sequencing**  
ID=MI0016763\_1;accession\_number=MI0016763;Name=hsa-mir-4424  
Total reads = 0



**C) PPB Case 14 tumor miRNA sequencing**  
ID=MI0016763\_1;accession\_number=MI0016763;Name=hsa-mir-4424  
Total reads = 0



**D) PPB Case 14 cell line miRNA sequencing**  
ID=MI0016763\_1;accession\_number=MI0016763;Name=hsa-mir-4424  
Total reads = 0





**B) Normal fibroblast miRNA sequencing**  
ID=MI0014137\_1;accession\_number=MI0014137;Name=hsa-mir-3121  
Total reads = 0



**C) PPB Case 14 tumor miRNA sequencing**  
ID=MI0014137\_1;accession\_number=MI0014137;Name=hsa-mir-3121  
Total reads = 0



**D) PPB Case 14 cell line miRNA sequencing**  
ID=MI0014137\_1;accession\_number=MI0014137;Name=hsa-mir-3121  
Total reads = 0



**B) Normal fibroblast miRNA sequencing**  
ID=MI0016765\_1;accession\_number=MI0016765;Name=hsa-mir-4426  
Total reads = 0



**C) PPB Case 14 tumor miRNA sequencing**  
ID=MI0016765\_1;accession\_number=MI0016765;Name=hsa-mir-4426  
Total reads = 0



**D) PPB Case 14 cell line miRNA sequencing**  
ID=MI0016765\_1;accession\_number=MI0016765;Name=hsa-mir-4426  
Total reads = 0



**B) Normal fibroblast miRNA sequencing**  
ID=MI0006425\_1;accession\_number=MI0006425;Name=hsa-mir-1278  
Total reads = 0



**C) PPB Case 14 tumor miRNA sequencing**  
ID=MI0006425\_1;accession\_number=MI0006425;Name=hsa-mir-1278  
Total reads = 0



**D) PPB Case 14 cell line miRNA sequencing**  
ID=MI0006425\_1;accession\_number=MI0006425;Name=hsa-mir-1278  
Total reads = 0



**B) Normal fibroblast miRNA sequencing**  
ID=MI0017372\_1;accession\_number=MI0017372;Name=hsa-mir-4735  
Total reads = 0



**C) PPB Case 14 tumor miRNA sequencing**  
ID=MI0017372\_1;accession\_number=MI0017372;Name=hsa-mir-4735  
Total reads = 0



**D) PPB Case 14 cell line miRNA sequencing**  
ID=MI0017372\_1;accession\_number=MI0017372;Name=hsa-mir-4735  
Total reads = 0

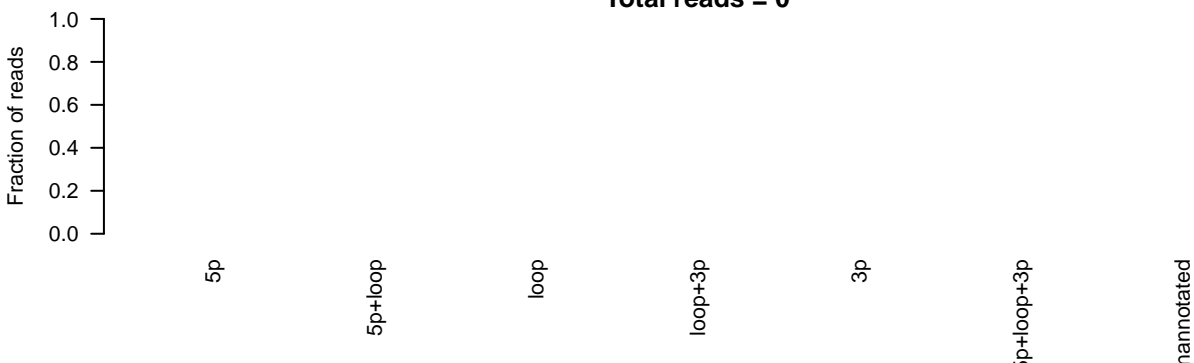

**B) Normal fibroblast miRNA sequencing**  
ID=MI0018170\_1;accession\_number=MI0018170;Name=hsa-mir-5191  
Total reads = 0



**C) PPB Case 14 tumor miRNA sequencing**  
ID=MI0018170\_1;accession\_number=MI0018170;Name=hsa-mir-5191  
Total reads = 0



**D) PPB Case 14 cell line miRNA sequencing**  
ID=MI0018170\_1;accession\_number=MI0018170;Name=hsa-mir-5191  
Total reads = 0



**B) Normal fibroblast miRNA sequencing**  
ID=MI0006321\_1;accession\_number=MI0006321;Name=hsa-mir-1231  
Total reads = 0



**C) PPB Case 14 tumor miRNA sequencing**  
ID=MI0006321\_1;accession\_number=MI0006321;Name=hsa-mir-1231  
Total reads = 0



**D) PPB Case 14 cell line miRNA sequencing**  
ID=MI0006321\_1;accession\_number=MI0006321;Name=hsa-mir-1231  
Total reads = 0



**B) Normal fibroblast miRNA sequencing**  
ID=MI0000810\_1;accession\_number=MI0000810;Name=hsa-mir-135b  
Total reads = 0



**C) PPB Case 14 tumor miRNA sequencing**  
ID=MI0000810\_1;accession\_number=MI0000810;Name=hsa-mir-135b  
Total reads = 4

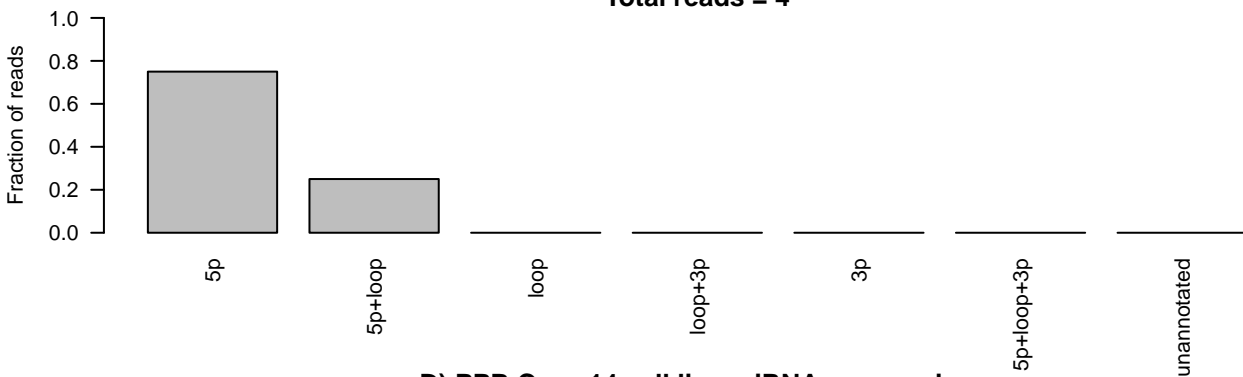

**D) PPB Case 14 cell line miRNA sequencing**  
ID=MI0000810\_1;accession\_number=MI0000810;Name=hsa-mir-135b  
Total reads = 0



**B) Normal fibroblast miRNA sequencing**  
ID=MI0000285\_1;accession\_number=MI0000285;Name=hsa-mir-205  
Total reads = 0



**C) PPB Case 14 tumor miRNA sequencing**  
ID=MI0000285\_1;accession\_number=MI0000285;Name=hsa-mir-205  
Total reads = 0



**D) PPB Case 14 cell line miRNA sequencing**  
ID=MI0000285\_1;accession\_number=MI0000285;Name=hsa-mir-205  
Total reads = 0





**B) Normal fibroblast miRNA sequencing**  
ID=MI0015859\_1;accession\_number=MI0015859;Name=hsa-mir-4260  
Total reads = 0



**C) PPB Case 14 tumor miRNA sequencing**  
ID=MI0015859\_1;accession\_number=MI0015859;Name=hsa-mir-4260  
Total reads = 0



**D) PPB Case 14 cell line miRNA sequencing**  
ID=MI0015859\_1;accession\_number=MI0015859;Name=hsa-mir-4260  
Total reads = 0



**B) Normal fibroblast miRNA sequencing**  
ID=MI0014138\_1;accession\_number=MI0014138;Name=hsa-mir-3122  
Total reads = 0



**C) PPB Case 14 tumor miRNA sequencing**  
ID=MI0014138\_1;accession\_number=MI0014138;Name=hsa-mir-3122  
Total reads = 0



**D) PPB Case 14 cell line miRNA sequencing**  
ID=MI0014138\_1;accession\_number=MI0014138;Name=hsa-mir-3122  
Total reads = 0



**B) Normal fibroblast miRNA sequencing**  
ID=MI0000291\_1;accession\_number=MI0000291;Name=hsa-mir-215  
Total reads = 0



**C) PPB Case 14 tumor miRNA sequencing**  
ID=MI0000291\_1;accession\_number=MI0000291;Name=hsa-mir-215  
Total reads = 0



**D) PPB Case 14 cell line miRNA sequencing**  
ID=MI0000291\_1;accession\_number=MI0000291;Name=hsa-mir-215  
Total reads = 0



**B) Normal fibroblast miRNA sequencing**  
ID=MI0017380\_1;accession\_number=MI0017380;Name=hsa-mir-4742  
Total reads = 0



**C) PPB Case 14 tumor miRNA sequencing**  
ID=MI0017380\_1;accession\_number=MI0017380;Name=hsa-mir-4742  
Total reads = 0



**D) PPB Case 14 cell line miRNA sequencing**  
ID=MI0017380\_1;accession\_number=MI0017380;Name=hsa-mir-4742  
Total reads = 0



**B) Normal fibroblast miRNA sequencing**  
ID=MI0017876\_1;accession\_number=MI0017876;Name=hsa-mir-5008  
Total reads = 0



**C) PPB Case 14 tumor miRNA sequencing**  
ID=MI0017876\_1;accession\_number=MI0017876;Name=hsa-mir-5008  
Total reads = 0



**D) PPB Case 14 cell line miRNA sequencing**  
ID=MI0017876\_1;accession\_number=MI0017876;Name=hsa-mir-5008  
Total reads = 0



**B) Normal fibroblast miRNA sequencing**  
ID=MI0016011\_1;accession\_number=MI0016011;Name=hsa-mir-3620  
Total reads = 0



**C) PPB Case 14 tumor miRNA sequencing**  
ID=MI0016011\_1;accession\_number=MI0016011;Name=hsa-mir-3620  
Total reads = 0



**D) PPB Case 14 cell line miRNA sequencing**  
ID=MI0016011\_1;accession\_number=MI0016011;Name=hsa-mir-3620  
Total reads = 0



**B) Normal fibroblast miRNA sequencing**  
ID=MI0017296\_1;accession\_number=MI0017296;Name=hsa-mir-4666a  
Total reads = 0



**C) PPB Case 14 tumor miRNA sequencing**  
ID=MI0017296\_1;accession\_number=MI0017296;Name=hsa-mir-4666a  
Total reads = 0



**D) PPB Case 14 cell line miRNA sequencing**  
ID=MI0017296\_1;accession\_number=MI0017296;Name=hsa-mir-4666a  
Total reads = 0



**B) Normal fibroblast miRNA sequencing**  
ID=MI0006275\_1;accession\_number=MI0006275;Name=hsa-mir-1182  
Total reads = 0



**C) PPB Case 14 tumor miRNA sequencing**  
ID=MI0006275\_1;accession\_number=MI0006275;Name=hsa-mir-1182  
Total reads = 0



**D) PPB Case 14 cell line miRNA sequencing**  
ID=MI0006275\_1;accession\_number=MI0006275;Name=hsa-mir-1182  
Total reads = 0





**B) Normal fibroblast miRNA sequencing**  
ID=MI0016766\_1;accession\_number=MI0016766;Name=hsa-mir-4427  
Total reads = 0



**C) PPB Case 14 tumor miRNA sequencing**  
ID=MI0016766\_1;accession\_number=MI0016766;Name=hsa-mir-4427  
Total reads = 0



**D) PPB Case 14 cell line miRNA sequencing**  
ID=MI0016766\_1;accession\_number=MI0016766;Name=hsa-mir-4427  
Total reads = 0



**B) Normal fibroblast miRNA sequencing**  
ID=MI0017302\_1;accession\_number=MI0017302;Name=hsa-mir-4671  
Total reads = 0



**C) PPB Case 14 tumor miRNA sequencing**  
ID=MI0017302\_1;accession\_number=MI0017302;Name=hsa-mir-4671  
Total reads = 0



**D) PPB Case 14 cell line miRNA sequencing**  
ID=MI0017302\_1;accession\_number=MI0017302;Name=hsa-mir-4671  
Total reads = 0



**B) Normal fibroblast miRNA sequencing**  
ID=MI0017392\_1;accession\_number=MI0017392;Name=hsa-mir-4753  
Total reads = 0



**C) PPB Case 14 tumor miRNA sequencing**  
ID=MI0017392\_1;accession\_number=MI0017392;Name=hsa-mir-4753  
Total reads = 0



**D) PPB Case 14 cell line miRNA sequencing**  
ID=MI0017392\_1;accession\_number=MI0017392;Name=hsa-mir-4753  
Total reads = 0



**B) Normal fibroblast miRNA sequencing**  
ID=MI0007258\_1;accession\_number=MI0007258;Name=hsa-mir-1537  
Total reads = 0



**C) PPB Case 14 tumor miRNA sequencing**  
ID=MI0007258\_1;accession\_number=MI0007258;Name=hsa-mir-1537  
Total reads = 0



**D) PPB Case 14 cell line miRNA sequencing**  
ID=MI0007258\_1;accession\_number=MI0007258;Name=hsa-mir-1537  
Total reads = 0



**B) Normal fibroblast miRNA sequencing**  
ID=MI0016767\_1;accession\_number=MI0016767;Name=hsa-mir-4428  
Total reads = 0



**C) PPB Case 14 tumor miRNA sequencing**  
ID=MI0016767\_1;accession\_number=MI0016767;Name=hsa-mir-4428  
Total reads = 0



**D) PPB Case 14 cell line miRNA sequencing**  
ID=MI0016767\_1;accession\_number=MI0016767;Name=hsa-mir-4428  
Total reads = 0



**B) Normal fibroblast miRNA sequencing**  
ID=MI0014139\_1;accession\_number=MI0014139;Name=hsa-mir-3123  
Total reads = 0



**C) PPB Case 14 tumor miRNA sequencing**  
ID=MI0014139\_1;accession\_number=MI0014139;Name=hsa-mir-3123  
Total reads = 0



**D) PPB Case 14 cell line miRNA sequencing**  
ID=MI0014139\_1;accession\_number=MI0014139;Name=hsa-mir-3123  
Total reads = 0



**B) Normal fibroblast miRNA sequencing**  
ID=MI0017308\_1;accession\_number=MI0017308;Name=hsa-mir-4677  
Total reads = 0



**C) PPB Case 14 tumor miRNA sequencing**  
ID=MI0017308\_1;accession\_number=MI0017308;Name=hsa-mir-4677  
Total reads = 0



**D) PPB Case 14 cell line miRNA sequencing**  
ID=MI0017308\_1;accession\_number=MI0017308;Name=hsa-mir-4677  
Total reads = 0



**B) Normal fibroblast miRNA sequencing**  
ID=MI0016422\_1;accession\_number=MI0016422;Name=hsa-mir-3916  
Total reads = 0



**C) PPB Case 14 tumor miRNA sequencing**  
ID=MI0016422\_1;accession\_number=MI0016422;Name=hsa-mir-3916  
Total reads = 0



**D) PPB Case 14 cell line miRNA sequencing**  
ID=MI0016422\_1;accession\_number=MI0016422;Name=hsa-mir-3916  
Total reads = 0





**B) Normal fibroblast miRNA sequencing**  
ID=MI0014140\_1;accession\_number=MI0014140;Name=hsa-mir-3124  
Total reads = 0



**C) PPB Case 14 tumor miRNA sequencing**  
ID=MI0014140\_1;accession\_number=MI0014140;Name=hsa-mir-3124  
Total reads = 0



**D) PPB Case 14 cell line miRNA sequencing**  
ID=MI0014140\_1;accession\_number=MI0014140;Name=hsa-mir-3124  
Total reads = 0



**B) Normal fibroblast miRNA sequencing**  
ID=MI0019306\_1;accession\_number=MI0019306;Name=hsa-mir-5699  
Total reads = 0



**C) PPB Case 14 tumor miRNA sequencing**  
ID=MI0019306\_1;accession\_number=MI0019306;Name=hsa-mir-5699  
Total reads = 0



**D) PPB Case 14 cell line miRNA sequencing**  
ID=MI0019306\_1;accession\_number=MI0019306;Name=hsa-mir-5699  
Total reads = 0



**B) Normal fibroblast miRNA sequencing**  
ID=MI0020349\_1;accession\_number=MI0020349;Name=hsa-mir-6072  
Total reads = 0



**C) PPB Case 14 tumor miRNA sequencing**  
ID=MI0020349\_1;accession\_number=MI0020349;Name=hsa-mir-6072  
Total reads = 0

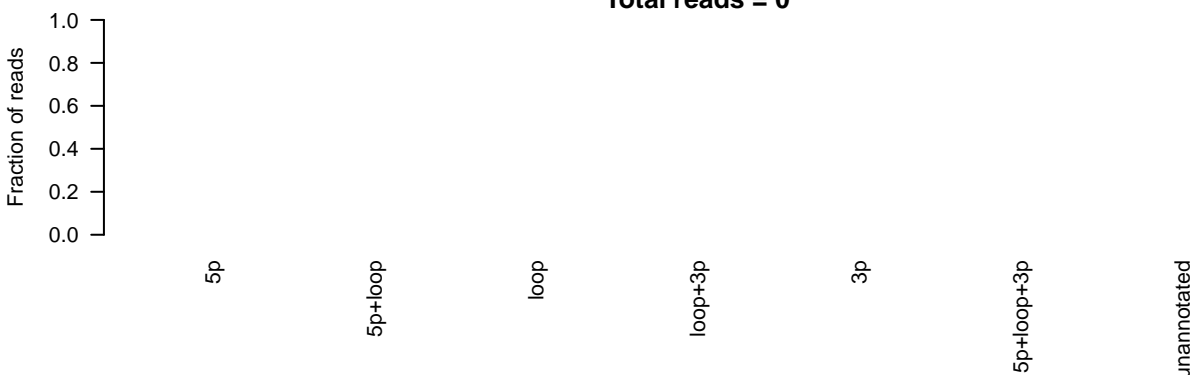

**D) PPB Case 14 cell line miRNA sequencing**  
ID=MI0020349\_1;accession\_number=MI0020349;Name=hsa-mir-6072  
Total reads = 0



**B) Normal fibroblast miRNA sequencing**  
ID=MI0020355\_1;accession\_number=MI0020355;Name=hsa-mir-6078  
Total reads = 0



**C) PPB Case 14 tumor miRNA sequencing**  
ID=MI0020355\_1;accession\_number=MI0020355;Name=hsa-mir-6078  
Total reads = 0



**D) PPB Case 14 cell line miRNA sequencing**  
ID=MI0020355\_1;accession\_number=MI0020355;Name=hsa-mir-6078  
Total reads = 0



**B) Normal fibroblast miRNA sequencing**  
ID=MI0014183\_1;accession\_number=MI0014183;Name=hsa-mir-3155a  
Total reads = 0



**C) PPB Case 14 tumor miRNA sequencing**  
ID=MI0014183\_1;accession\_number=MI0014183;Name=hsa-mir-3155a  
Total reads = 0



**D) PPB Case 14 cell line miRNA sequencing**  
ID=MI0014183\_1;accession\_number=MI0014183;Name=hsa-mir-3155a  
Total reads = 0



**B) Normal fibroblast miRNA sequencing**  
ID=MI0016839\_1;accession\_number=MI0016839;Name=hsa-mir-3155b  
Total reads = 0



**C) PPB Case 14 tumor miRNA sequencing**  
ID=MI0016839\_1;accession\_number=MI0016839;Name=hsa-mir-3155b  
Total reads = 0



**D) PPB Case 14 cell line miRNA sequencing**  
ID=MI0016839\_1;accession\_number=MI0016839;Name=hsa-mir-3155b  
Total reads = 0



**B) Normal fibroblast miRNA sequencing**  
ID=MI0016840\_1;accession\_number=MI0016840;Name=hsa-mir-548ak  
Total reads = 0



**C) PPB Case 14 tumor miRNA sequencing**  
ID=MI0016840\_1;accession\_number=MI0016840;Name=hsa-mir-548ak  
Total reads = 0



**D) PPB Case 14 cell line miRNA sequencing**  
ID=MI0016840\_1;accession\_number=MI0016840;Name=hsa-mir-548ak  
Total reads = 0



**B) Normal fibroblast miRNA sequencing**  
ID=MI0016841\_1;accession\_number=MI0016841;Name=hsa-mir-4480  
Total reads = 0



**C) PPB Case 14 tumor miRNA sequencing**  
ID=MI0016841\_1;accession\_number=MI0016841;Name=hsa-mir-4480  
Total reads = 0



**D) PPB Case 14 cell line miRNA sequencing**  
ID=MI0016841\_1;accession\_number=MI0016841;Name=hsa-mir-4480  
Total reads = 0





**B) Normal fibroblast miRNA sequencing**  
ID=MI0016842\_1;accession\_number=MI0016842;Name=hsa-mir-4481  
Total reads = 0



**C) PPB Case 14 tumor miRNA sequencing**  
ID=MI0016842\_1;accession\_number=MI0016842;Name=hsa-mir-4481  
Total reads = 0



**D) PPB Case 14 cell line miRNA sequencing**  
ID=MI0016842\_1;accession\_number=MI0016842;Name=hsa-mir-4481  
Total reads = 0



**B) Normal fibroblast miRNA sequencing**  
ID=MI0010637\_1;accession\_number=MI0010637;Name=hsa-mir-548q  
Total reads = 0



**C) PPB Case 14 tumor miRNA sequencing**  
ID=MI0010637\_1;accession\_number=MI0010637;Name=hsa-mir-548q  
Total reads = 0



**D) PPB Case 14 cell line miRNA sequencing**  
ID=MI0010637\_1;accession\_number=MI0010637;Name=hsa-mir-548q  
Total reads = 0



**B) Normal fibroblast miRNA sequencing**  
ID=MI0015826\_1;accession\_number=MI0015826;Name=hsa-mir-4293  
Total reads = 0



**C) PPB Case 14 tumor miRNA sequencing**  
ID=MI0015826\_1;accession\_number=MI0015826;Name=hsa-mir-4293  
Total reads = 0



**D) PPB Case 14 cell line miRNA sequencing**  
ID=MI0015826\_1;accession\_number=MI0015826;Name=hsa-mir-4293  
Total reads = 0



**B) Normal fibroblast miRNA sequencing**  
ID=MI0006401\_1;accession\_number=MI0006401;Name=hsa-mir-1265  
Total reads = 0



**C) PPB Case 14 tumor miRNA sequencing**  
ID=MI0006401\_1;accession\_number=MI0006401;Name=hsa-mir-1265  
Total reads = 0



**D) PPB Case 14 cell line miRNA sequencing**  
ID=MI0006401\_1;accession\_number=MI0006401;Name=hsa-mir-1265  
Total reads = 0



**B) Normal fibroblast miRNA sequencing**  
ID=MI0003127\_1;accession\_number=MI0003127;Name=hsa-mir-511-1  
Total reads = 0



**C) PPB Case 14 tumor miRNA sequencing**  
ID=MI0003127\_1;accession\_number=MI0003127;Name=hsa-mir-511-1  
Total reads = 0



**D) PPB Case 14 cell line miRNA sequencing**  
ID=MI0003127\_1;accession\_number=MI0003127;Name=hsa-mir-511-1  
Total reads = 0



**B) Normal fibroblast miRNA sequencing**  
ID=MI0003128\_1;accession\_number=MI0003128;Name=hsa-mir-511-2  
Total reads = 0



**C) PPB Case 14 tumor miRNA sequencing**  
ID=MI0003128\_1;accession\_number=MI0003128;Name=hsa-mir-511-2  
Total reads = 0



**D) PPB Case 14 cell line miRNA sequencing**  
ID=MI0003128\_1;accession\_number=MI0003128;Name=hsa-mir-511-2  
Total reads = 0



**B) Normal fibroblast miRNA sequencing**  
ID=MI0017306\_1;accession\_number=MI0017306;Name=hsa-mir-4675  
Total reads = 0



**C) PPB Case 14 tumor miRNA sequencing**  
ID=MI0017306\_1;accession\_number=MI0017306;Name=hsa-mir-4675  
Total reads = 0

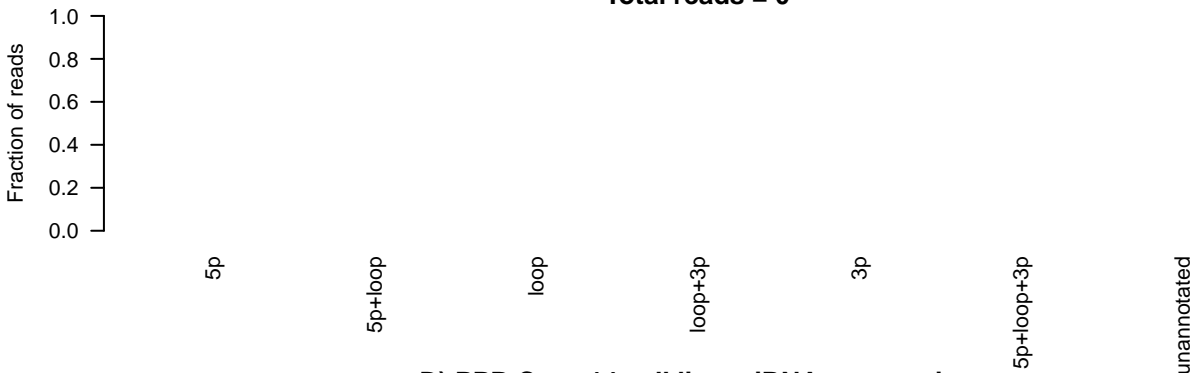

**D) PPB Case 14 cell line miRNA sequencing**  
ID=MI0017306\_1;accession\_number=MI0017306;Name=hsa-mir-4675  
Total reads = 0



**B) Normal fibroblast miRNA sequencing**  
ID=MI0008336\_1;accession\_number=MI0008336;Name=hsa-mir-1915  
Total reads = 0



**C) PPB Case 14 tumor miRNA sequencing**  
ID=MI0008336\_1;accession\_number=MI0008336;Name=hsa-mir-1915  
Total reads = 0



**D) PPB Case 14 cell line miRNA sequencing**  
ID=MI0008336\_1;accession\_number=MI0008336;Name=hsa-mir-1915  
Total reads = 0





**B) Normal fibroblast miRNA sequencing**  
ID=MI0016747\_1;accession\_number=MI0016747;Name=hsa-mir-1254-2  
Total reads = 0



**C) PPB Case 14 tumor miRNA sequencing**  
ID=MI0016747\_1;accession\_number=MI0016747;Name=hsa-mir-1254-2  
Total reads = 0



**D) PPB Case 14 cell line miRNA sequencing**  
ID=MI0016747\_1;accession\_number=MI0016747;Name=hsa-mir-1254-2  
Total reads = 0



**B) Normal fibroblast miRNA sequencing**  
ID=MI0003616\_1;accession\_number=MI0003616;Name=hsa-mir-603  
Total reads = 0



**C) PPB Case 14 tumor miRNA sequencing**  
ID=MI0003616\_1;accession\_number=MI0003616;Name=hsa-mir-603  
Total reads = 0



**D) PPB Case 14 cell line miRNA sequencing**  
ID=MI0003616\_1;accession\_number=MI0003616;Name=hsa-mir-603  
Total reads = 0



**B) Normal fibroblast miRNA sequencing**  
ID=MI0003617\_1;accession\_number=MI0003617;Name=hsa-mir-604  
Total reads = 0



**C) PPB Case 14 tumor miRNA sequencing**  
ID=MI0003617\_1;accession\_number=MI0003617;Name=hsa-mir-604  
Total reads = 0



**D) PPB Case 14 cell line miRNA sequencing**  
ID=MI0003617\_1;accession\_number=MI0003617;Name=hsa-mir-604  
Total reads = 0



**B) Normal fibroblast miRNA sequencing**  
ID=MI0005760\_1;accession\_number=MI0005760;Name=hsa-mir-938  
Total reads = 0



**C) PPB Case 14 tumor miRNA sequencing**  
ID=MI0005760\_1;accession\_number=MI0005760;Name=hsa-mir-938  
Total reads = 0

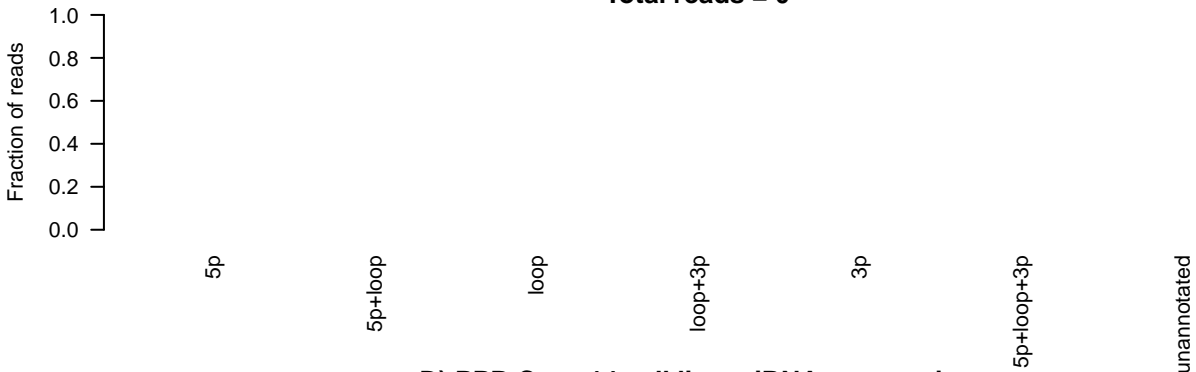

**D) PPB Case 14 cell line miRNA sequencing**  
ID=MI0005760\_1;accession\_number=MI0005760;Name=hsa-mir-938  
Total reads = 0



**B) Normal fibroblast miRNA sequencing**  
ID=MI0016001\_1;accession\_number=MI0016001;Name=hsa-mir-3611  
Total reads = 0



**C) PPB Case 14 tumor miRNA sequencing**  
ID=MI0016001\_1;accession\_number=MI0016001;Name=hsa-mir-3611  
Total reads = 0



**D) PPB Case 14 cell line miRNA sequencing**  
ID=MI0016001\_1;accession\_number=MI0016001;Name=hsa-mir-3611  
Total reads = 0



**B) Normal fibroblast miRNA sequencing**  
ID=MI0017315\_1;accession\_number=MI0017315;Name=hsa-mir-4683  
Total reads = 0



**C) PPB Case 14 tumor miRNA sequencing**  
ID=MI0017315\_1;accession\_number=MI0017315;Name=hsa-mir-4683  
Total reads = 0



**D) PPB Case 14 cell line miRNA sequencing**  
ID=MI0017315\_1;accession\_number=MI0017315;Name=hsa-mir-4683  
Total reads = 0



**B) Normal fibroblast miRNA sequencing**  
ID=MI0019116\_1;accession\_number=MI0019116;Name=hsa-mir-5100  
Total reads = 0



**C) PPB Case 14 tumor miRNA sequencing**  
ID=MI0019116\_1;accession\_number=MI0019116;Name=hsa-mir-5100  
Total reads = 0



**D) PPB Case 14 cell line miRNA sequencing**  
ID=MI0019116\_1;accession\_number=MI0019116;Name=hsa-mir-5100  
Total reads = 0



**B) Normal fibroblast miRNA sequencing**  
ID=MI0014184\_1;accession\_number=MI0014184;Name=hsa-mir-3156-1  
Total reads = 0



**C) PPB Case 14 tumor miRNA sequencing**  
ID=MI0014184\_1;accession\_number=MI0014184;Name=hsa-mir-3156-1  
Total reads = 0

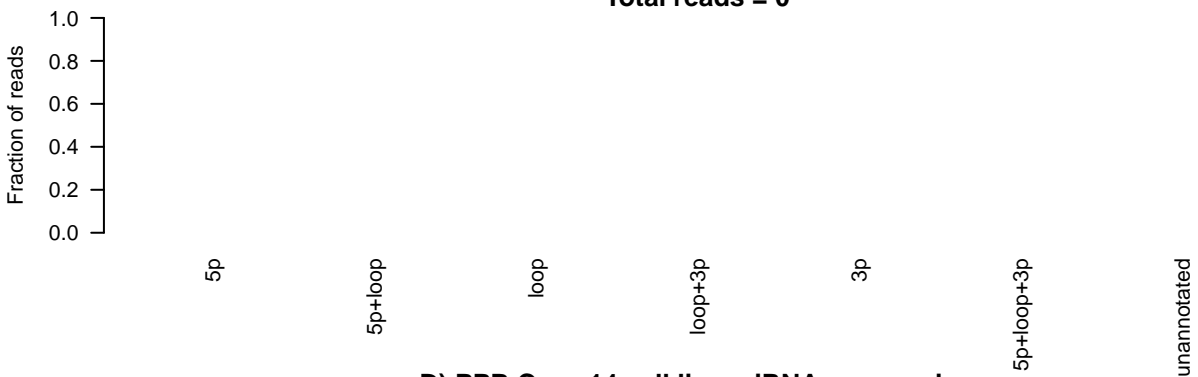

**D) PPB Case 14 cell line miRNA sequencing**  
ID=MI0014184\_1;accession\_number=MI0014184;Name=hsa-mir-3156-1  
Total reads = 0

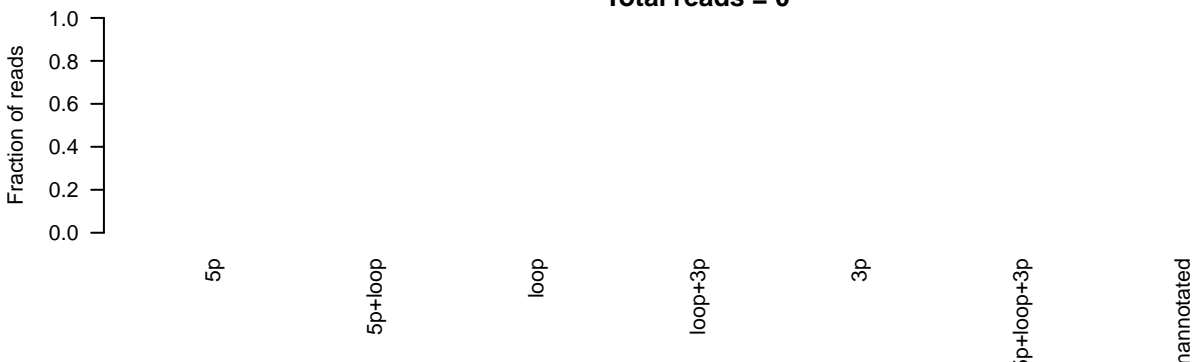



**B) Normal fibroblast miRNA sequencing**  
ID=MI0015827\_1;accession\_number=MI0015827;Name=hsa-mir-4294  
Total reads = 0



**C) PPB Case 14 tumor miRNA sequencing**  
ID=MI0015827\_1;accession\_number=MI0015827;Name=hsa-mir-4294  
Total reads = 0



**D) PPB Case 14 cell line miRNA sequencing**  
ID=MI0015827\_1;accession\_number=MI0015827;Name=hsa-mir-4294  
Total reads = 0



**B) Normal fibroblast miRNA sequencing**  
ID=MI0003618\_1;accession\_number=MI0003618;Name=hsa-mir-605  
Total reads = 0



**C) PPB Case 14 tumor miRNA sequencing**  
ID=MI0003618\_1;accession\_number=MI0003618;Name=hsa-mir-605  
Total reads = 0



**D) PPB Case 14 cell line miRNA sequencing**  
ID=MI0003618\_1;accession\_number=MI0003618;Name=hsa-mir-605  
Total reads = 0



**B) Normal fibroblast miRNA sequencing**  
ID=MI0006374\_1;accession\_number=MI0006374;Name=hsa-mir-548f-1  
Total reads = 0



**C) PPB Case 14 tumor miRNA sequencing**  
ID=MI0006374\_1;accession\_number=MI0006374;Name=hsa-mir-548f-1  
Total reads = 0



**D) PPB Case 14 cell line miRNA sequencing**  
ID=MI0006374\_1;accession\_number=MI0006374;Name=hsa-mir-548f-1  
Total reads = 0



**B) Normal fibroblast miRNA sequencing**  
ID=MI0016432\_1;accession\_number=MI0016432;Name=hsa-mir-3924  
Total reads = 0



**C) PPB Case 14 tumor miRNA sequencing**  
ID=MI0016432\_1;accession\_number=MI0016432;Name=hsa-mir-3924  
Total reads = 0



**D) PPB Case 14 cell line miRNA sequencing**  
ID=MI0016432\_1;accession\_number=MI0016432;Name=hsa-mir-3924  
Total reads = 0



**B) Normal fibroblast miRNA sequencing**  
ID=MI0003780\_1;accession\_number=MI0003780;Name=hsa-mir-1296  
Total reads = 0



**C) PPB Case 14 tumor miRNA sequencing**  
ID=MI0003780\_1;accession\_number=MI0003780;Name=hsa-mir-1296  
Total reads = 0



**D) PPB Case 14 cell line miRNA sequencing**  
ID=MI0003780\_1;accession\_number=MI0003780;Name=hsa-mir-1296  
Total reads = 0



**B) Normal fibroblast miRNA sequencing**  
ID=MI0006388\_1;accession\_number=MI0006388;Name=hsa-mir-1254-1  
Total reads = 0



**C) PPB Case 14 tumor miRNA sequencing**  
ID=MI0006388\_1;accession\_number=MI0006388;Name=hsa-mir-1254-1  
Total reads = 0



**D) PPB Case 14 cell line miRNA sequencing**  
ID=MI0006388\_1;accession\_number=MI0006388;Name=hsa-mir-1254-1  
Total reads = 0



**B) Normal fibroblast miRNA sequencing**  
ID=MI0017307\_1;accession\_number=MI0017307;Name=hsa-mir-4676  
Total reads = 0



**C) PPB Case 14 tumor miRNA sequencing**  
ID=MI0017307\_1;accession\_number=MI0017307;Name=hsa-mir-4676  
Total reads = 0



**D) PPB Case 14 cell line miRNA sequencing**  
ID=MI0017307\_1;accession\_number=MI0017307;Name=hsa-mir-4676  
Total reads = 0



**B) Normal fibroblast miRNA sequencing**  
ID=MI0003619\_1;accession\_number=MI0003619;Name=hsa-mir-606  
Total reads = 0



**C) PPB Case 14 tumor miRNA sequencing**  
ID=MI0003619\_1;accession\_number=MI0003619;Name=hsa-mir-606  
Total reads = 0



**D) PPB Case 14 cell line miRNA sequencing**  
ID=MI0003619\_1;accession\_number=MI0003619;Name=hsa-mir-606  
Total reads = 0





**B) Normal fibroblast miRNA sequencing**  
ID=MI0000826\_1;accession\_number=MI0000826;Name=hsa-mir-346  
Total reads = 0



**C) PPB Case 14 tumor miRNA sequencing**  
ID=MI0000826\_1;accession\_number=MI0000826;Name=hsa-mir-346  
Total reads = 0



**D) PPB Case 14 cell line miRNA sequencing**  
ID=MI0000826\_1;accession\_number=MI0000826;Name=hsa-mir-346  
Total reads = 0



**B) Normal fibroblast miRNA sequencing**  
ID=MI0017309\_1;accession\_number=MI0017309;Name=hsa-mir-4678  
Total reads = 0



**C) PPB Case 14 tumor miRNA sequencing**  
ID=MI0017309\_1;accession\_number=MI0017309;Name=hsa-mir-4678  
Total reads = 0



**D) PPB Case 14 cell line miRNA sequencing**  
ID=MI0017309\_1;accession\_number=MI0017309;Name=hsa-mir-4678  
Total reads = 0



**B) Normal fibroblast miRNA sequencing**  
ID=MI0017311\_1;accession\_number=MI0017311;Name=hsa-mir-4679-2  
Total reads = 0



**C) PPB Case 14 tumor miRNA sequencing**  
ID=MI0017311\_1;accession\_number=MI0017311;Name=hsa-mir-4679-2  
Total reads = 0



**D) PPB Case 14 cell line miRNA sequencing**  
ID=MI0017311\_1;accession\_number=MI0017311;Name=hsa-mir-4679-2  
Total reads = 0



**B) Normal fibroblast miRNA sequencing**  
ID=MI0017310\_1;accession\_number=MI0017310;Name=hsa-mir-4679-1  
Total reads = 0



**C) PPB Case 14 tumor miRNA sequencing**  
ID=MI0017310\_1;accession\_number=MI0017310;Name=hsa-mir-4679-1  
Total reads = 0



**D) PPB Case 14 cell line miRNA sequencing**  
ID=MI0017310\_1;accession\_number=MI0017310;Name=hsa-mir-4679-1  
Total reads = 0



**B) Normal fibroblast miRNA sequencing**  
ID=MI0014185\_1;accession\_number=MI0014185;Name=hsa-mir-3157  
Total reads = 0



**C) PPB Case 14 tumor miRNA sequencing**  
ID=MI0014185\_1;accession\_number=MI0014185;Name=hsa-mir-3157  
Total reads = 0



**D) PPB Case 14 cell line miRNA sequencing**  
ID=MI0014185\_1;accession\_number=MI0014185;Name=hsa-mir-3157  
Total reads = 0



**B) Normal fibroblast miRNA sequencing**  
ID=MI0003620\_1;accession\_number=MI0003620;Name=hsa-mir-607  
Total reads = 0



**C) PPB Case 14 tumor miRNA sequencing**  
ID=MI0003620\_1;accession\_number=MI0003620;Name=hsa-mir-607  
Total reads = 0



**D) PPB Case 14 cell line miRNA sequencing**  
ID=MI0003620\_1;accession\_number=MI0003620;Name=hsa-mir-607  
Total reads = 0



**B) Normal fibroblast miRNA sequencing**  
ID=MI0019290\_1;accession\_number=MI0019290;Name=hsa-mir-5686  
Total reads = 0



**C) PPB Case 14 tumor miRNA sequencing**  
ID=MI0019290\_1;accession\_number=MI0019290;Name=hsa-mir-5686  
Total reads = 0



**D) PPB Case 14 cell line miRNA sequencing**  
ID=MI0019290\_1;accession\_number=MI0019290;Name=hsa-mir-5686  
Total reads = 0



**B) Normal fibroblast miRNA sequencing**  
ID=MI0006349\_1;accession\_number=MI0006349;Name=hsa-mir-1287  
Total reads = 0



**C) PPB Case 14 tumor miRNA sequencing**  
ID=MI0006349\_1;accession\_number=MI0006349;Name=hsa-mir-1287  
Total reads = 0



**D) PPB Case 14 cell line miRNA sequencing**  
ID=MI0006349\_1;accession\_number=MI0006349;Name=hsa-mir-1287  
Total reads = 0





**B) Normal fibroblast miRNA sequencing**  
ID=MI0017317\_1;accession\_number=MI0017317;Name=hsa-mir-4685  
Total reads = 0



**C) PPB Case 14 tumor miRNA sequencing**  
ID=MI0017317\_1;accession\_number=MI0017317;Name=hsa-mir-4685  
Total reads = 0



**D) PPB Case 14 cell line miRNA sequencing**  
ID=MI0017317\_1;accession\_number=MI0017317;Name=hsa-mir-4685  
Total reads = 0



**B) Normal fibroblast miRNA sequencing**  
ID=MI0022219\_1;accession\_number=MI0022219;Name=hsa-mir-6507  
Total reads = 0



**C) PPB Case 14 tumor miRNA sequencing**  
ID=MI0022219\_1;accession\_number=MI0022219;Name=hsa-mir-6507  
Total reads = 1



**D) PPB Case 14 cell line miRNA sequencing**  
ID=MI0022219\_1;accession\_number=MI0022219;Name=hsa-mir-6507  
Total reads = 0



**B) Normal fibroblast miRNA sequencing**  
ID=MI0003621\_1;accession\_number=MI0003621;Name=hsa-mir-608  
Total reads = 0



**C) PPB Case 14 tumor miRNA sequencing**  
ID=MI0003621\_1;accession\_number=MI0003621;Name=hsa-mir-608  
Total reads = 0



**D) PPB Case 14 cell line miRNA sequencing**  
ID=MI0003621\_1;accession\_number=MI0003621;Name=hsa-mir-608  
Total reads = 0



**B) Normal fibroblast miRNA sequencing**  
ID=MI0005758\_1;accession\_number=MI0005758;Name=hsa-mir-936  
Total reads = 0



**C) PPB Case 14 tumor miRNA sequencing**  
ID=MI0005758\_1;accession\_number=MI0005758;Name=hsa-mir-936  
Total reads = 0



**D) PPB Case 14 cell line miRNA sequencing**  
ID=MI0005758\_1;accession\_number=MI0005758;Name=hsa-mir-936  
Total reads = 0



**B) Normal fibroblast miRNA sequencing**  
ID=MI0003622\_1;accession\_number=MI0003622;Name=hsa-mir-609  
Total reads = 0



**C) PPB Case 14 tumor miRNA sequencing**  
ID=MI0003622\_1;accession\_number=MI0003622;Name=hsa-mir-609  
Total reads = 0



**D) PPB Case 14 cell line miRNA sequencing**  
ID=MI0003622\_1;accession\_number=MI0003622;Name=hsa-mir-609  
Total reads = 0



**B) Normal fibroblast miRNA sequencing**  
ID=MI0016843\_1;accession\_number=MI0016843;Name=hsa-mir-4482  
Total reads = 0



**C) PPB Case 14 tumor miRNA sequencing**  
ID=MI0016843\_1;accession\_number=MI0016843;Name=hsa-mir-4482  
Total reads = 0



**D) PPB Case 14 cell line miRNA sequencing**  
ID=MI0016843\_1;accession\_number=MI0016843;Name=hsa-mir-4482  
Total reads = 0



**B) Normal fibroblast miRNA sequencing**  
ID=MI0017312\_1;accession\_number=MI0017312;Name=hsa-mir-4680  
Total reads = 0



**C) PPB Case 14 tumor miRNA sequencing**  
ID=MI0017312\_1;accession\_number=MI0017312;Name=hsa-mir-4680  
Total reads = 0



**D) PPB Case 14 cell line miRNA sequencing**  
ID=MI0017312\_1;accession\_number=MI0017312;Name=hsa-mir-4680  
Total reads = 0



**B) Normal fibroblast miRNA sequencing**  
ID=MI0006344\_1;accession\_number=MI0006344;Name=hsa-mir-548e  
Total reads = 0



**C) PPB Case 14 tumor miRNA sequencing**  
ID=MI0006344\_1;accession\_number=MI0006344;Name=hsa-mir-548e  
Total reads = 0

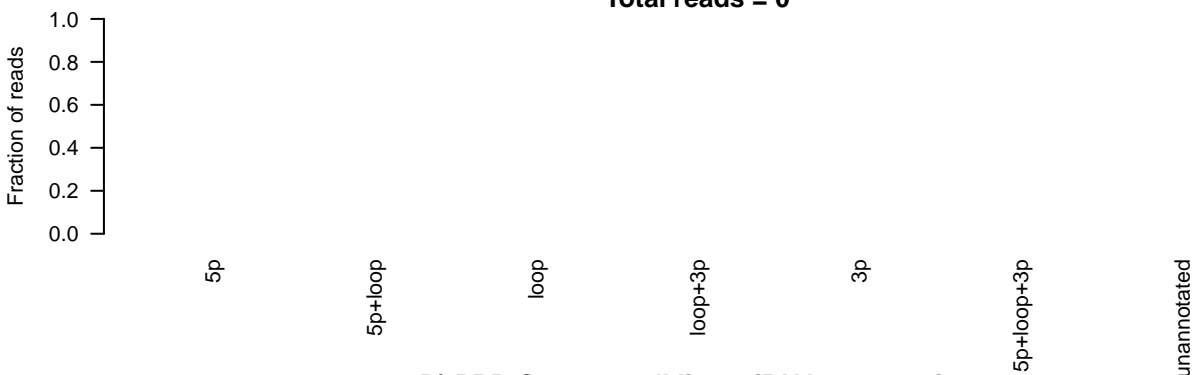

**D) PPB Case 14 cell line miRNA sequencing**  
ID=MI0006344\_1;accession\_number=MI0006344;Name=hsa-mir-548e  
Total reads = 0





**B) Normal fibroblast miRNA sequencing**  
ID=MI0022548\_1;accession\_number=MI0022548;Name=hsa-mir-6715a  
Total reads = 0



**C) PPB Case 14 tumor miRNA sequencing**  
ID=MI0022548\_1;accession\_number=MI0022548;Name=hsa-mir-6715a  
Total reads = 0



**D) PPB Case 14 cell line miRNA sequencing**  
ID=MI0022548\_1;accession\_number=MI0022548;Name=hsa-mir-6715a  
Total reads = 0



**B) Normal fibroblast miRNA sequencing**  
ID=MI0022549\_1;accession\_number=MI0022549;Name=hsa-mir-6715b  
Total reads = 0



**C) PPB Case 14 tumor miRNA sequencing**  
ID=MI0022549\_1;accession\_number=MI0022549;Name=hsa-mir-6715b  
Total reads = 0



**D) PPB Case 14 cell line miRNA sequencing**  
ID=MI0022549\_1;accession\_number=MI0022549;Name=hsa-mir-6715b  
Total reads = 0



**B) Normal fibroblast miRNA sequencing**  
ID=MI0015822\_1;accession\_number=MI0015822;Name=hsa-mir-4295  
Total reads = 0



**C) PPB Case 14 tumor miRNA sequencing**  
ID=MI0015822\_1;accession\_number=MI0015822;Name=hsa-mir-4295  
Total reads = 0



**D) PPB Case 14 cell line miRNA sequencing**  
ID=MI0015822\_1;accession\_number=MI0015822;Name=hsa-mir-4295  
Total reads = 0



**B) Normal fibroblast miRNA sequencing**  
ID=MI0016844\_1;accession\_number=MI0016844;Name=hsa-mir-4483  
Total reads = 0



**C) PPB Case 14 tumor miRNA sequencing**  
ID=MI0016844\_1;accession\_number=MI0016844;Name=hsa-mir-4483  
Total reads = 0



**D) PPB Case 14 cell line miRNA sequencing**  
ID=MI0016844\_1;accession\_number=MI0016844;Name=hsa-mir-4483  
Total reads = 0



**B) Normal fibroblast miRNA sequencing**  
ID=MI0016064\_1;accession\_number=MI0016064;Name=hsa-mir-3663  
Total reads = 0



**C) PPB Case 14 tumor miRNA sequencing**  
ID=MI0016064\_1;accession\_number=MI0016064;Name=hsa-mir-3663  
Total reads = 0



**D) PPB Case 14 cell line miRNA sequencing**  
ID=MI0016064\_1;accession\_number=MI0016064;Name=hsa-mir-3663  
Total reads = 0



**B) Normal fibroblast miRNA sequencing**  
ID=MI0017313\_1;accession\_number=MI0017313;Name=hsa-mir-4681  
Total reads = 0



**C) PPB Case 14 tumor miRNA sequencing**  
ID=MI0017313\_1;accession\_number=MI0017313;Name=hsa-mir-4681  
Total reads = 0



**D) PPB Case 14 cell line miRNA sequencing**  
ID=MI0017313\_1;accession\_number=MI0017313;Name=hsa-mir-4681  
Total reads = 0



**B) Normal fibroblast miRNA sequencing**  
ID=MI0017314\_1;accession\_number=MI0017314;Name=hsa-mir-4682  
Total reads = 0



**C) PPB Case 14 tumor miRNA sequencing**  
ID=MI0017314\_1;accession\_number=MI0017314;Name=hsa-mir-4682  
Total reads = 0



**D) PPB Case 14 cell line miRNA sequencing**  
ID=MI0017314\_1;accession\_number=MI0017314;Name=hsa-mir-4682  
Total reads = 0



**B) Normal fibroblast miRNA sequencing**  
ID=MI0016598\_1;accession\_number=MI0016598;Name=hsa-mir-3941  
Total reads = 0



**C) PPB Case 14 tumor miRNA sequencing**  
ID=MI0016598\_1;accession\_number=MI0016598;Name=hsa-mir-3941  
Total reads = 0



**D) PPB Case 14 cell line miRNA sequencing**  
ID=MI0016598\_1;accession\_number=MI0016598;Name=hsa-mir-3941  
Total reads = 0





**B) Normal fibroblast miRNA sequencing**  
ID=MI0015823\_1;accession\_number=MI0015823;Name=hsa-mir-4296  
Total reads = 0



**C) PPB Case 14 tumor miRNA sequencing**  
ID=MI0015823\_1;accession\_number=MI0015823;Name=hsa-mir-4296  
Total reads = 0



**D) PPB Case 14 cell line miRNA sequencing**  
ID=MI0015823\_1;accession\_number=MI0015823;Name=hsa-mir-4296  
Total reads = 0



**B) Normal fibroblast miRNA sequencing**  
ID=MI0015824\_1;accession\_number=MI0015824;Name=hsa-mir-4297  
Total reads = 0



**C) PPB Case 14 tumor miRNA sequencing**  
ID=MI0015824\_1;accession\_number=MI0015824;Name=hsa-mir-4297  
Total reads = 0



**D) PPB Case 14 cell line miRNA sequencing**  
ID=MI0015824\_1;accession\_number=MI0015824;Name=hsa-mir-4297  
Total reads = 0



**B) Normal fibroblast miRNA sequencing**  
ID=MI0015825\_1;accession\_number=MI0015825;Name=hsa-mir-378c  
Total reads = 0



**C) PPB Case 14 tumor miRNA sequencing**  
ID=MI0015825\_1;accession\_number=MI0015825;Name=hsa-mir-378c  
Total reads = 0



**D) PPB Case 14 cell line miRNA sequencing**  
ID=MI0015825\_1;accession\_number=MI0015825;Name=hsa-mir-378c  
Total reads = 0



**B) Normal fibroblast miRNA sequencing**  
ID=MI0003130\_1;accession\_number=MI0003130;Name=hsa-mir-202  
Total reads = 0



**C) PPB Case 14 tumor miRNA sequencing**  
ID=MI0003130\_1;accession\_number=MI0003130;Name=hsa-mir-202  
Total reads = 0



**D) PPB Case 14 cell line miRNA sequencing**  
ID=MI0003130\_1;accession\_number=MI0003130;Name=hsa-mir-202  
Total reads = 0



**B) Normal fibroblast miRNA sequencing**  
ID=MI0016601\_1;accession\_number=MI0016601;Name=hsa-mir-3944  
Total reads = 0



**C) PPB Case 14 tumor miRNA sequencing**  
ID=MI0016601\_1;accession\_number=MI0016601;Name=hsa-mir-3944  
Total reads = 0



**D) PPB Case 14 cell line miRNA sequencing**  
ID=MI0016601\_1;accession\_number=MI0016601;Name=hsa-mir-3944  
Total reads = 0



**B) Normal fibroblast miRNA sequencing**  
ID=MI0015830\_1;accession\_number=MI0015830;Name=hsa-mir-4298  
Total reads = 0



**C) PPB Case 14 tumor miRNA sequencing**  
ID=MI0015830\_1;accession\_number=MI0015830;Name=hsa-mir-4298  
Total reads = 0



**D) PPB Case 14 cell line miRNA sequencing**  
ID=MI0015830\_1;accession\_number=MI0015830;Name=hsa-mir-4298  
Total reads = 0



**B) Normal fibroblast miRNA sequencing**  
ID=MI0005416\_1;accession\_number=MI0005416;Name=hsa-mir-675  
Total reads = 0



**C) PPB Case 14 tumor miRNA sequencing**  
ID=MI0005416\_1;accession\_number=MI0005416;Name=hsa-mir-675  
Total reads = 3

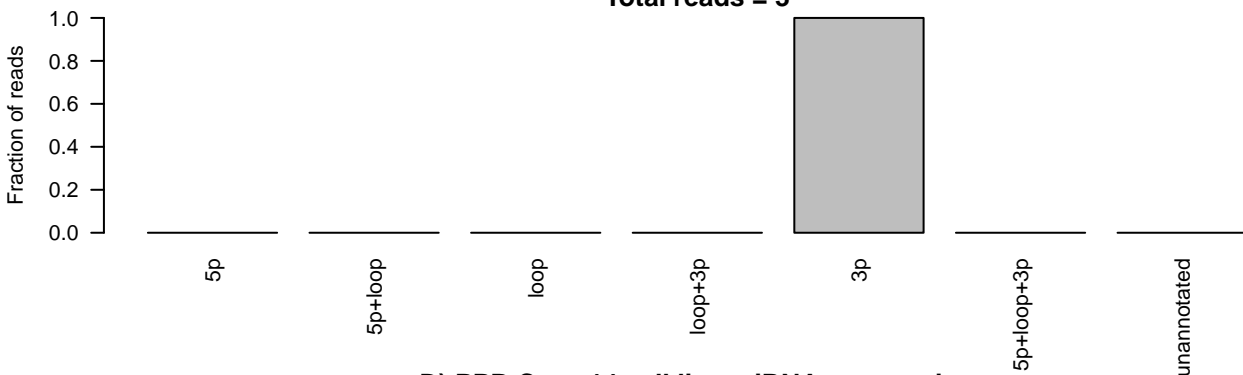

**D) PPB Case 14 cell line miRNA sequencing**  
ID=MI0005416\_1;accession\_number=MI0005416;Name=hsa-mir-675  
Total reads = 0



**B) Normal fibroblast miRNA sequencing**  
ID=MI0002467\_1;accession\_number=MI0002467;Name=hsa-mir-483  
Total reads = 0



**C) PPB Case 14 tumor miRNA sequencing**  
ID=MI0002467\_1;accession\_number=MI0002467;Name=hsa-mir-483  
Total reads = 117

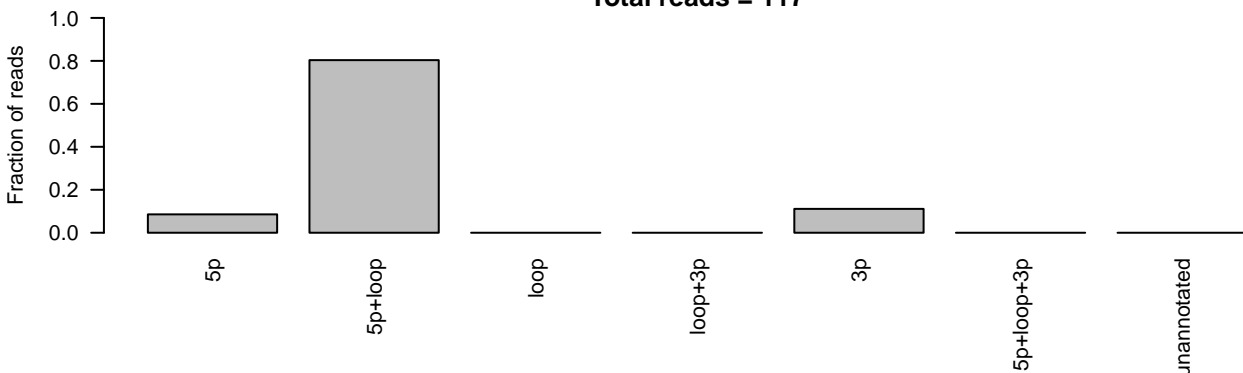

**D) PPB Case 14 cell line miRNA sequencing**  
ID=MI0002467\_1;accession\_number=MI0002467;Name=hsa-mir-483  
Total reads = 2

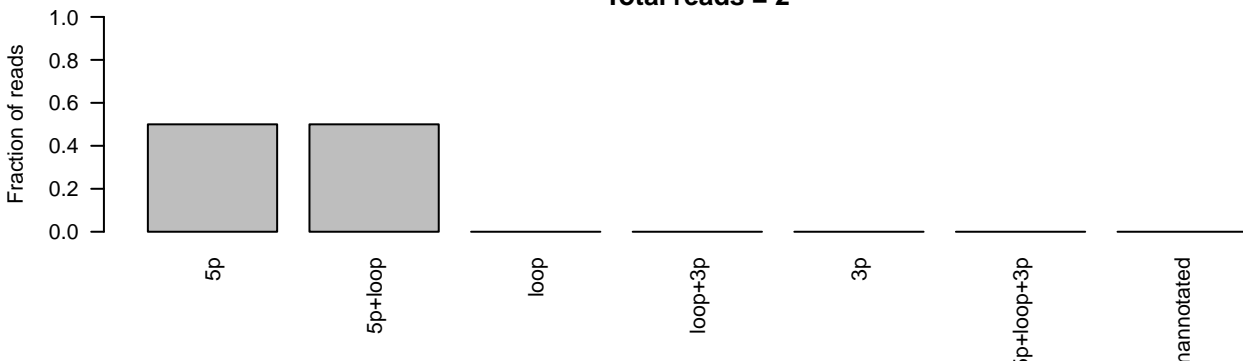



**B) Normal fibroblast miRNA sequencing**  
ID=MI0017318\_1;accession\_number=MI0017318;Name=hsa-mir-4686  
Total reads = 0



**C) PPB Case 14 tumor miRNA sequencing**  
ID=MI0017318\_1;accession\_number=MI0017318;Name=hsa-mir-4686  
Total reads = 0



**D) PPB Case 14 cell line miRNA sequencing**  
ID=MI0017318\_1;accession\_number=MI0017318;Name=hsa-mir-4686  
Total reads = 0



**B) Normal fibroblast miRNA sequencing**  
ID=MI0017319\_1;accession\_number=MI0017319;Name=hsa-mir-4687  
Total reads = 0



**C) PPB Case 14 tumor miRNA sequencing**  
ID=MI0017319\_1;accession\_number=MI0017319;Name=hsa-mir-4687  
Total reads = 0



**D) PPB Case 14 cell line miRNA sequencing**  
ID=MI0017319\_1;accession\_number=MI0017319;Name=hsa-mir-4687  
Total reads = 0



**B) Normal fibroblast miRNA sequencing**  
ID=MI0006417\_1;accession\_number=MI0006417;Name=hsa-mir-302e  
Total reads = 0



**C) PPB Case 14 tumor miRNA sequencing**  
ID=MI0006417\_1;accession\_number=MI0006417;Name=hsa-mir-302e  
Total reads = 0



**D) PPB Case 14 cell line miRNA sequencing**  
ID=MI0006417\_1;accession\_number=MI0006417;Name=hsa-mir-302e  
Total reads = 0



**B) Normal fibroblast miRNA sequencing**  
ID=MI0019296\_1;accession\_number=MI0019296;Name=hsa-mir-5691  
Total reads = 0



**C) PPB Case 14 tumor miRNA sequencing**  
ID=MI0019296\_1;accession\_number=MI0019296;Name=hsa-mir-5691  
Total reads = 0



**D) PPB Case 14 cell line miRNA sequencing**  
ID=MI0019296\_1;accession\_number=MI0019296;Name=hsa-mir-5691  
Total reads = 0



**B) Normal fibroblast miRNA sequencing**  
ID=MI0015829\_1;accession\_number=MI0015829;Name=hsa-mir-4299  
Total reads = 0



**C) PPB Case 14 tumor miRNA sequencing**  
ID=MI0015829\_1;accession\_number=MI0015829;Name=hsa-mir-4299  
Total reads = 0



**D) PPB Case 14 cell line miRNA sequencing**  
ID=MI0015829\_1;accession\_number=MI0015829;Name=hsa-mir-4299  
Total reads = 0



**B) Normal fibroblast miRNA sequencing**  
ID=MI0021258\_1;accession\_number=MI0021258;Name=hsa-mir-6124  
Total reads = 0



**C) PPB Case 14 tumor miRNA sequencing**  
ID=MI0021258\_1;accession\_number=MI0021258;Name=hsa-mir-6124  
Total reads = 0



**D) PPB Case 14 cell line miRNA sequencing**  
ID=MI0021258\_1;accession\_number=MI0021258;Name=hsa-mir-6124  
Total reads = 0



**B) Normal fibroblast miRNA sequencing**  
ID=MI0020350\_1;accession\_number=MI0020350;Name=hsa-mir-6073  
Total reads = 0



**C) PPB Case 14 tumor miRNA sequencing**  
ID=MI0020350\_1;accession\_number=MI0020350;Name=hsa-mir-6073  
Total reads = 0



**D) PPB Case 14 cell line miRNA sequencing**  
ID=MI0020350\_1;accession\_number=MI0020350;Name=hsa-mir-6073  
Total reads = 0



**B) Normal fibroblast miRNA sequencing**  
ID=MI0014188\_1;accession\_number=MI0014188;Name=hsa-mir-3159  
Total reads = 0



**C) PPB Case 14 tumor miRNA sequencing**  
ID=MI0014188\_1;accession\_number=MI0014188;Name=hsa-mir-3159  
Total reads = 0



**D) PPB Case 14 cell line miRNA sequencing**  
ID=MI0014188\_1;accession\_number=MI0014188;Name=hsa-mir-3159  
Total reads = 0





**B) Normal fibroblast miRNA sequencing**  
ID=MI0016847\_1;accession\_number=MI0016847;Name=hsa-mir-4486  
Total reads = 0



**C) PPB Case 14 tumor miRNA sequencing**  
ID=MI0016847\_1;accession\_number=MI0016847;Name=hsa-mir-4486  
Total reads = 0



**D) PPB Case 14 cell line miRNA sequencing**  
ID=MI0016847\_1;accession\_number=MI0016847;Name=hsa-mir-4486  
Total reads = 0



**B) Normal fibroblast miRNA sequencing**  
ID=MI0017327\_1;accession\_number=MI0017327;Name=hsa-mir-4694  
Total reads = 0



**C) PPB Case 14 tumor miRNA sequencing**  
ID=MI0017327\_1;accession\_number=MI0017327;Name=hsa-mir-4694  
Total reads = 0



**D) PPB Case 14 cell line miRNA sequencing**  
ID=MI0017327\_1;accession\_number=MI0017327;Name=hsa-mir-4694  
Total reads = 0



**B) Normal fibroblast miRNA sequencing**  
ID=MI0003623\_1;accession\_number=MI0003623;Name=hsa-mir-610  
Total reads = 0



**C) PPB Case 14 tumor miRNA sequencing**  
ID=MI0003623\_1;accession\_number=MI0003623;Name=hsa-mir-610  
Total reads = 0



**D) PPB Case 14 cell line miRNA sequencing**  
ID=MI0003623\_1;accession\_number=MI0003623;Name=hsa-mir-610  
Total reads = 0



**B) Normal fibroblast miRNA sequencing**  
ID=MI0017320\_1;accession\_number=MI0017320;Name=hsa-mir-1343  
Total reads = 0



**C) PPB Case 14 tumor miRNA sequencing**  
ID=MI0017320\_1;accession\_number=MI0017320;Name=hsa-mir-1343  
Total reads = 0



**D) PPB Case 14 cell line miRNA sequencing**  
ID=MI0017320\_1;accession\_number=MI0017320;Name=hsa-mir-1343  
Total reads = 0



**B) Normal fibroblast miRNA sequencing**  
ID=MI0016991\_1;accession\_number=MI0016991;Name=hsa-mir-3973  
Total reads = 0



**C) PPB Case 14 tumor miRNA sequencing**  
ID=MI0016991\_1;accession\_number=MI0016991;Name=hsa-mir-3973  
Total reads = 0



**D) PPB Case 14 cell line miRNA sequencing**  
ID=MI0016991\_1;accession\_number=MI0016991;Name=hsa-mir-3973  
Total reads = 0



**B) Normal fibroblast miRNA sequencing**  
ID=MI0003933\_1;accession\_number=MI0003933;Name=hsa-mir-670  
Total reads = 0



**C) PPB Case 14 tumor miRNA sequencing**  
ID=MI0003933\_1;accession\_number=MI0003933;Name=hsa-mir-670  
Total reads = 0



**D) PPB Case 14 cell line miRNA sequencing**  
ID=MI0003933\_1;accession\_number=MI0003933;Name=hsa-mir-670  
Total reads = 0



**B) Normal fibroblast miRNA sequencing**  
ID=MI0017321\_1;accession\_number=MI0017321;Name=hsa-mir-4688  
Total reads = 0



**C) PPB Case 14 tumor miRNA sequencing**  
ID=MI0017321\_1;accession\_number=MI0017321;Name=hsa-mir-4688  
Total reads = 0



**D) PPB Case 14 cell line miRNA sequencing**  
ID=MI0017321\_1;accession\_number=MI0017321;Name=hsa-mir-4688  
Total reads = 0



**B) Normal fibroblast miRNA sequencing**  
ID=MI0014189\_1;accession\_number=MI0014189;Name=hsa-mir-3160-1  
Total reads = 0



**C) PPB Case 14 tumor miRNA sequencing**  
ID=MI0014189\_1;accession\_number=MI0014189;Name=hsa-mir-3160-1  
Total reads = 1

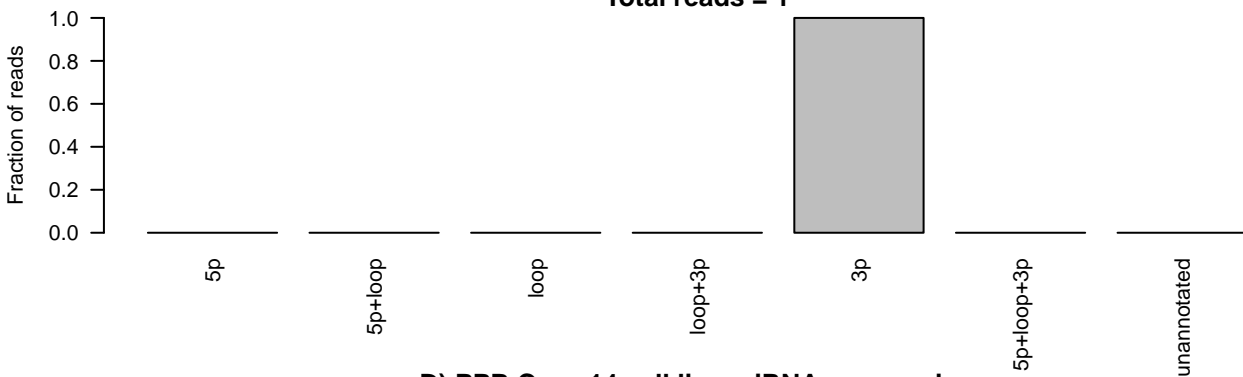

**D) PPB Case 14 cell line miRNA sequencing**  
ID=MI0014189\_1;accession\_number=MI0014189;Name=hsa-mir-3160-1  
Total reads = 0





**B) Normal fibroblast miRNA sequencing**  
ID=MI0014190\_1;accession\_number=MI0014190;Name=hsa-mir-3160-2  
Total reads = 0



**C) PPB Case 14 tumor miRNA sequencing**  
ID=MI0014190\_1;accession\_number=MI0014190;Name=hsa-mir-3160-2  
Total reads = 1

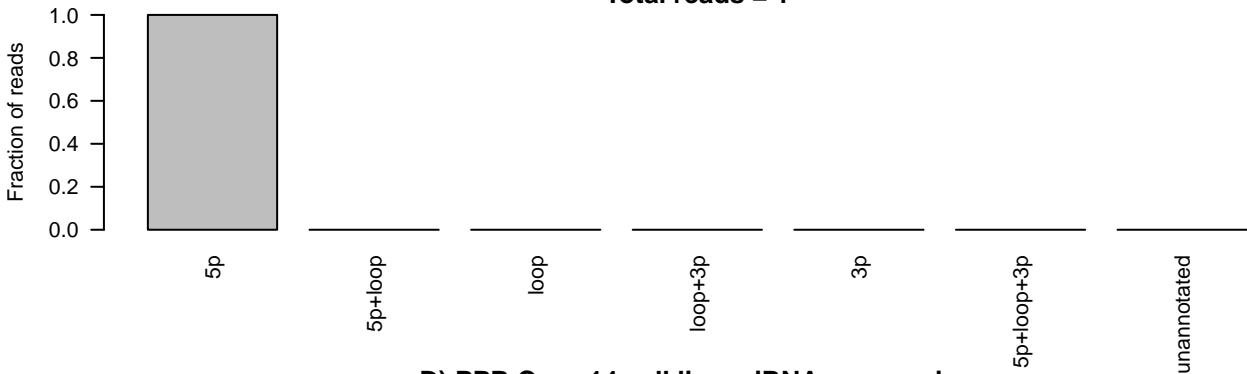

**D) PPB Case 14 cell line miRNA sequencing**  
ID=MI0014190\_1;accession\_number=MI0014190;Name=hsa-mir-3160-2  
Total reads = 0



**B) Normal fibroblast miRNA sequencing**  
ID=MI0019138\_1;accession\_number=MI0019138;Name=hsa-mir-5582  
Total reads = 0



**C) PPB Case 14 tumor miRNA sequencing**  
ID=MI0019138\_1;accession\_number=MI0019138;Name=hsa-mir-5582  
Total reads = 0



**D) PPB Case 14 cell line miRNA sequencing**  
ID=MI0019138\_1;accession\_number=MI0019138;Name=hsa-mir-5582  
Total reads = 0



**B) Normal fibroblast miRNA sequencing**  
ID=MI0016848\_1;accession\_number=MI0016848;Name=hsa-mir-4487  
Total reads = 0



**C) PPB Case 14 tumor miRNA sequencing**  
ID=MI0016848\_1;accession\_number=MI0016848;Name=hsa-mir-4487  
Total reads = 0



**D) PPB Case 14 cell line miRNA sequencing**  
ID=MI0016848\_1;accession\_number=MI0016848;Name=hsa-mir-4487  
Total reads = 0



**B) Normal fibroblast miRNA sequencing**  
ID=MI0014191\_1;accession\_number=MI0014191;Name=hsa-mir-3161  
Total reads = 0



**C) PPB Case 14 tumor miRNA sequencing**  
ID=MI0014191\_1;accession\_number=MI0014191;Name=hsa-mir-3161  
Total reads = 0

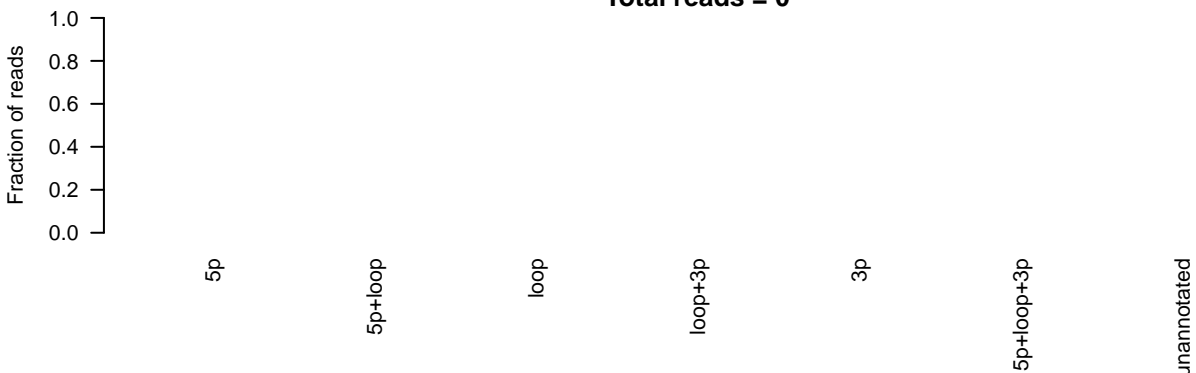

**D) PPB Case 14 cell line miRNA sequencing**  
ID=MI0014191\_1;accession\_number=MI0014191;Name=hsa-mir-3161  
Total reads = 0



**B) Normal fibroblast miRNA sequencing**  
ID=MI0021272\_1;accession\_number=MI0021272;Name=hsa-mir-6128  
Total reads = 0



**C) PPB Case 14 tumor miRNA sequencing**  
ID=MI0021272\_1;accession\_number=MI0021272;Name=hsa-mir-6128  
Total reads = 0



**D) PPB Case 14 cell line miRNA sequencing**  
ID=MI0021272\_1;accession\_number=MI0021272;Name=hsa-mir-6128  
Total reads = 0



**B) Normal fibroblast miRNA sequencing**  
ID=MI0014192\_1;accession\_number=MI0014192;Name=hsa-mir-3162  
Total reads = 0

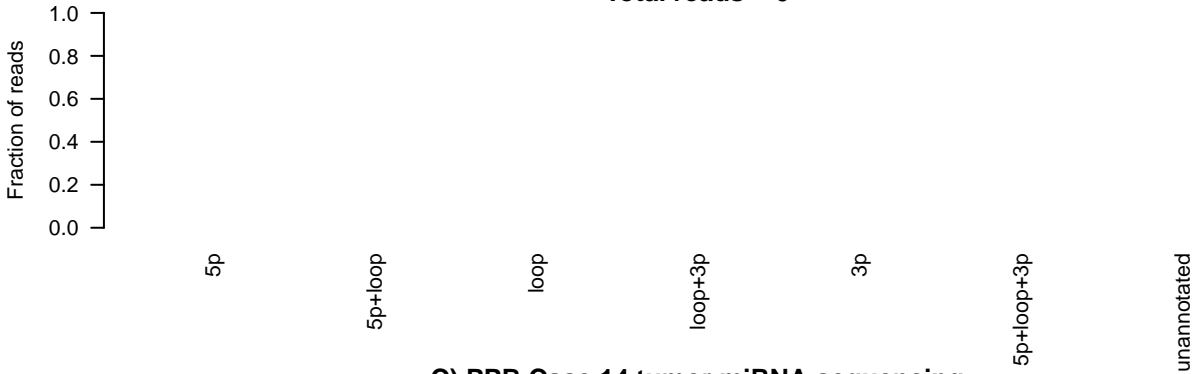

**C) PPB Case 14 tumor miRNA sequencing**  
ID=MI0014192\_1;accession\_number=MI0014192;Name=hsa-mir-3162  
Total reads = 0



**D) PPB Case 14 cell line miRNA sequencing**  
ID=MI0014192\_1;accession\_number=MI0014192;Name=hsa-mir-3162  
Total reads = 0



**B) Normal fibroblast miRNA sequencing**  
ID=MI0022215\_1;accession\_number=MI0022215;Name=hsa-mir-6503  
Total reads = 0



**C) PPB Case 14 tumor miRNA sequencing**  
ID=MI0022215\_1;accession\_number=MI0022215;Name=hsa-mir-6503  
Total reads = 0



**D) PPB Case 14 cell line miRNA sequencing**  
ID=MI0022215\_1;accession\_number=MI0022215;Name=hsa-mir-6503  
Total reads = 0



**B) Normal fibroblast miRNA sequencing**  
ID=MI0003624\_1;accession\_number=MI0003624;Name=hsa-mir-611  
Total reads = 0



**C) PPB Case 14 tumor miRNA sequencing**  
ID=MI0003624\_1;accession\_number=MI0003624;Name=hsa-mir-611  
Total reads = 0



**D) PPB Case 14 cell line miRNA sequencing**  
ID=MI0003624\_1;accession\_number=MI0003624;Name=hsa-mir-611  
Total reads = 0





**B) Normal fibroblast miRNA sequencing**  
ID=MI0008329\_1;accession\_number=MI0008329;Name=hsa-mir-1908  
Total reads = 0



**C) PPB Case 14 tumor miRNA sequencing**  
ID=MI0008329\_1;accession\_number=MI0008329;Name=hsa-mir-1908  
Total reads = 0



**D) PPB Case 14 cell line miRNA sequencing**  
ID=MI0008329\_1;accession\_number=MI0008329;Name=hsa-mir-1908  
Total reads = 0



**B) Normal fibroblast miRNA sequencing**  
ID=MI0022226\_1;accession\_number=MI0022226;Name=hsa-mir-6514  
Total reads = 0



**C) PPB Case 14 tumor miRNA sequencing**  
ID=MI0022226\_1;accession\_number=MI0022226;Name=hsa-mir-6514  
Total reads = 1



**D) PPB Case 14 cell line miRNA sequencing**  
ID=MI0022226\_1;accession\_number=MI0022226;Name=hsa-mir-6514  
Total reads = 0



**B) Normal fibroblast miRNA sequencing**  
ID=MI0006327\_1;accession\_number=MI0006327;Name=hsa-mir-1237  
Total reads = 0



**C) PPB Case 14 tumor miRNA sequencing**  
ID=MI0006327\_1;accession\_number=MI0006327;Name=hsa-mir-1237  
Total reads = 0



**D) PPB Case 14 cell line miRNA sequencing**  
ID=MI0006327\_1;accession\_number=MI0006327;Name=hsa-mir-1237  
Total reads = 0



**B) Normal fibroblast miRNA sequencing**  
ID=MI0000234\_1;accession\_number=MI0000234;Name=hsa-mir-192  
Total reads = 0



**C) PPB Case 14 tumor miRNA sequencing**  
ID=MI0000234\_1;accession\_number=MI0000234;Name=hsa-mir-192  
Total reads = 0



**D) PPB Case 14 cell line miRNA sequencing**  
ID=MI0000234\_1;accession\_number=MI0000234;Name=hsa-mir-192  
Total reads = 0



**B) Normal fibroblast miRNA sequencing**  
ID=MI0003625\_1;accession\_number=MI0003625;Name=hsa-mir-612  
Total reads = 0



**C) PPB Case 14 tumor miRNA sequencing**  
ID=MI0003625\_1;accession\_number=MI0003625;Name=hsa-mir-612  
Total reads = 0



**D) PPB Case 14 cell line miRNA sequencing**  
ID=MI0003625\_1;accession\_number=MI0003625;Name=hsa-mir-612  
Total reads = 0



**B) Normal fibroblast miRNA sequencing**  
ID=MI0017323\_1;accession\_number=MI0017323;Name=hsa-mir-4690  
Total reads = 0



**C) PPB Case 14 tumor miRNA sequencing**  
ID=MI0017323\_1;accession\_number=MI0017323;Name=hsa-mir-4690  
Total reads = 2

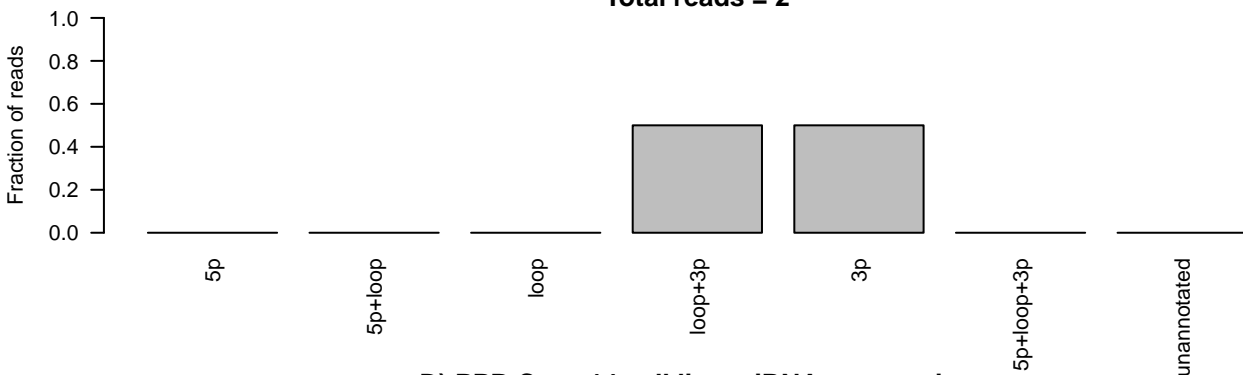

**D) PPB Case 14 cell line miRNA sequencing**  
ID=MI0017323\_1;accession\_number=MI0017323;Name=hsa-mir-4690  
Total reads = 0



**B) Normal fibroblast miRNA sequencing**  
ID=MI0016850\_1;accession\_number=MI0016850;Name=hsa-mir-4489  
Total reads = 0



**C) PPB Case 14 tumor miRNA sequencing**  
ID=MI0016850\_1;accession\_number=MI0016850;Name=hsa-mir-4489  
Total reads = 0



**D) PPB Case 14 cell line miRNA sequencing**  
ID=MI0016850\_1;accession\_number=MI0016850;Name=hsa-mir-4489  
Total reads = 0



**B) Normal fibroblast miRNA sequencing**  
ID=MI0014193\_1;accession\_number=MI0014193;Name=hsa-mir-3163  
Total reads = 0



**C) PPB Case 14 tumor miRNA sequencing**  
ID=MI0014193\_1;accession\_number=MI0014193;Name=hsa-mir-3163  
Total reads = 0



**D) PPB Case 14 cell line miRNA sequencing**  
ID=MI0014193\_1;accession\_number=MI0014193;Name=hsa-mir-3163  
Total reads = 0





**B) Normal fibroblast miRNA sequencing**  
ID=MI0017324\_1;accession\_number=MI0017324;Name=hsa-mir-4691  
Total reads = 0



**C) PPB Case 14 tumor miRNA sequencing**  
ID=MI0017324\_1;accession\_number=MI0017324;Name=hsa-mir-4691  
Total reads = 0



**D) PPB Case 14 cell line miRNA sequencing**  
ID=MI0017324\_1;accession\_number=MI0017324;Name=hsa-mir-4691  
Total reads = 0



**B) Normal fibroblast miRNA sequencing**  
ID=MI0014194\_1;accession\_number=MI0014194;Name=hsa-mir-3164  
Total reads = 0



**C) PPB Case 14 tumor miRNA sequencing**  
ID=MI0014194\_1;accession\_number=MI0014194;Name=hsa-mir-3164  
Total reads = 0



**D) PPB Case 14 cell line miRNA sequencing**  
ID=MI0014194\_1;accession\_number=MI0014194;Name=hsa-mir-3164  
Total reads = 0



**B) Normal fibroblast miRNA sequencing**  
ID=MI0006354\_1;accession\_number=MI0006354;Name=hsa-mir-548k  
Total reads = 0



**C) PPB Case 14 tumor miRNA sequencing**  
ID=MI0006354\_1;accession\_number=MI0006354;Name=hsa-mir-548k  
Total reads = 0



**D) PPB Case 14 cell line miRNA sequencing**  
ID=MI0006354\_1;accession\_number=MI0006354;Name=hsa-mir-548k  
Total reads = 0



**B) Normal fibroblast miRNA sequencing**  
ID=MI0016065\_1;accession\_number=MI0016065;Name=hsa-mir-3664  
Total reads = 0



**C) PPB Case 14 tumor miRNA sequencing**  
ID=MI0016065\_1;accession\_number=MI0016065;Name=hsa-mir-3664  
Total reads = 0



**D) PPB Case 14 cell line miRNA sequencing**  
ID=MI0016065\_1;accession\_number=MI0016065;Name=hsa-mir-3664  
Total reads = 0



**B) Normal fibroblast miRNA sequencing**  
ID=MI0014195\_1;accession\_number=MI0014195;Name=hsa-mir-3165  
Total reads = 0



**C) PPB Case 14 tumor miRNA sequencing**  
ID=MI0014195\_1;accession\_number=MI0014195;Name=hsa-mir-3165  
Total reads = 0



**D) PPB Case 14 cell line miRNA sequencing**  
ID=MI0014195\_1;accession\_number=MI0014195;Name=hsa-mir-3165  
Total reads = 0



**B) Normal fibroblast miRNA sequencing**  
ID=MI0000261\_1;accession\_number=MI0000261;Name=hsa-mir-139  
Total reads = 0



**C) PPB Case 14 tumor miRNA sequencing**  
ID=MI0000261\_1;accession\_number=MI0000261;Name=hsa-mir-139  
Total reads = 0



**D) PPB Case 14 cell line miRNA sequencing**  
ID=MI0000261\_1;accession\_number=MI0000261;Name=hsa-mir-139  
Total reads = 0



**B) Normal fibroblast miRNA sequencing**  
ID=MI0017325\_1;accession\_number=MI0017325;Name=hsa-mir-4692  
Total reads = 0



**C) PPB Case 14 tumor miRNA sequencing**  
ID=MI0017325\_1;accession\_number=MI0017325;Name=hsa-mir-4692  
Total reads = 0



**D) PPB Case 14 cell line miRNA sequencing**  
ID=MI0017325\_1;accession\_number=MI0017325;Name=hsa-mir-4692  
Total reads = 0



**B) Normal fibroblast miRNA sequencing**  
ID=MI0016851\_1;accession\_number=MI0016851;Name=hsa-mir-548a1  
Total reads = 0



**C) PPB Case 14 tumor miRNA sequencing**  
ID=MI0016851\_1;accession\_number=MI0016851;Name=hsa-mir-548a1  
Total reads = 0



**D) PPB Case 14 cell line miRNA sequencing**  
ID=MI0016851\_1;accession\_number=MI0016851;Name=hsa-mir-548a1  
Total reads = 0





**B) Normal fibroblast miRNA sequencing**  
ID=MI0017329\_1;accession\_number=MI0017329;Name=hsa-mir-4696  
Total reads = 0



**C) PPB Case 14 tumor miRNA sequencing**  
ID=MI0017329\_1;accession\_number=MI0017329;Name=hsa-mir-4696  
Total reads = 0



**D) PPB Case 14 cell line miRNA sequencing**  
ID=MI0017329\_1;accession\_number=MI0017329;Name=hsa-mir-4696  
Total reads = 0



**B) Normal fibroblast miRNA sequencing**  
ID=MI0019133\_1;accession\_number=MI0019133;Name=hsa-mir-5579  
Total reads = 0



**C) PPB Case 14 tumor miRNA sequencing**  
ID=MI0019133\_1;accession\_number=MI0019133;Name=hsa-mir-5579  
Total reads = 0



**D) PPB Case 14 cell line miRNA sequencing**  
ID=MI0019133\_1;accession\_number=MI0019133;Name=hsa-mir-5579  
Total reads = 0



**B) Normal fibroblast miRNA sequencing**  
ID=MI0015831\_1;accession\_number=MI0015831;Name=hsa-mir-4300  
Total reads = 0



**C) PPB Case 14 tumor miRNA sequencing**  
ID=MI0015831\_1;accession\_number=MI0015831;Name=hsa-mir-4300  
Total reads = 0



**D) PPB Case 14 cell line miRNA sequencing**  
ID=MI0015831\_1;accession\_number=MI0015831;Name=hsa-mir-4300  
Total reads = 0



**B) Normal fibroblast miRNA sequencing**  
ID=MI0014196\_1;accession\_number=MI0014196;Name=hsa-mir-3166  
Total reads = 0



**C) PPB Case 14 tumor miRNA sequencing**  
ID=MI0014196\_1;accession\_number=MI0014196;Name=hsa-mir-3166  
Total reads = 0



**D) PPB Case 14 cell line miRNA sequencing**  
ID=MI0014196\_1;accession\_number=MI0014196;Name=hsa-mir-3166  
Total reads = 0



**B) Normal fibroblast miRNA sequencing**  
ID=MI0016852\_1;accession\_number=MI0016852;Name=hsa-mir-4490  
Total reads = 0



**C) PPB Case 14 tumor miRNA sequencing**  
ID=MI0016852\_1;accession\_number=MI0016852;Name=hsa-mir-4490  
Total reads = 0



**D) PPB Case 14 cell line miRNA sequencing**  
ID=MI0016852\_1;accession\_number=MI0016852;Name=hsa-mir-4490  
Total reads = 0



**B) Normal fibroblast miRNA sequencing**  
ID=MI0006396\_1;accession\_number=MI0006396;Name=hsa-mir-1261  
Total reads = 0



**C) PPB Case 14 tumor miRNA sequencing**  
ID=MI0006396\_1;accession\_number=MI0006396;Name=hsa-mir-1261  
Total reads = 0



**D) PPB Case 14 cell line miRNA sequencing**  
ID=MI0006396\_1;accession\_number=MI0006396;Name=hsa-mir-1261  
Total reads = 0



**B) Normal fibroblast miRNA sequencing**  
ID=MI0006371\_1;accession\_number=MI0006371;Name=hsa-mir-1304  
Total reads = 0



**C) PPB Case 14 tumor miRNA sequencing**  
ID=MI0006371\_1;accession\_number=MI0006371;Name=hsa-mir-1304  
Total reads = 0



**D) PPB Case 14 cell line miRNA sequencing**  
ID=MI0006371\_1;accession\_number=MI0006371;Name=hsa-mir-1304  
Total reads = 0



**B) Normal fibroblast miRNA sequencing**  
ID=MI0006361\_1;accession\_number=MI0006361;Name=hsa-mir-548l  
Total reads = 0



**C) PPB Case 14 tumor miRNA sequencing**  
ID=MI0006361\_1;accession\_number=MI0006361;Name=hsa-mir-548l  
Total reads = 0



**D) PPB Case 14 cell line miRNA sequencing**  
ID=MI0006361\_1;accession\_number=MI0006361;Name=hsa-mir-548l  
Total reads = 0





**B) Normal fibroblast miRNA sequencing**  
ID=MI0014197\_1;accession\_number=MI0014197;Name=hsa-mir-1260b  
Total reads = 0



**C) PPB Case 14 tumor miRNA sequencing**  
ID=MI0014197\_1;accession\_number=MI0014197;Name=hsa-mir-1260b  
Total reads = 0



**D) PPB Case 14 cell line miRNA sequencing**  
ID=MI0014197\_1;accession\_number=MI0014197;Name=hsa-mir-1260b  
Total reads = 0



**B) Normal fibroblast miRNA sequencing**  
ID=MI0016427\_1;accession\_number=MI0016427;Name=hsa-mir-3920  
Total reads = 0



**C) PPB Case 14 tumor miRNA sequencing**  
ID=MI0016427\_1;accession\_number=MI0016427;Name=hsa-mir-3920  
Total reads = 0



**D) PPB Case 14 cell line miRNA sequencing**  
ID=MI0016427\_1;accession\_number=MI0016427;Name=hsa-mir-3920  
Total reads = 0



**B) Normal fibroblast miRNA sequencing**  
ID=MI0017326\_1;accession\_number=MI0017326;Name=hsa-mir-4693  
Total reads = 0



**C) PPB Case 14 tumor miRNA sequencing**  
ID=MI0017326\_1;accession\_number=MI0017326;Name=hsa-mir-4693  
Total reads = 0



**D) PPB Case 14 cell line miRNA sequencing**  
ID=MI0017326\_1;accession\_number=MI0017326;Name=hsa-mir-4693  
Total reads = 0



**B) Normal fibroblast miRNA sequencing**  
ID=MI0016853\_1;accession\_number=MI0016853;Name=hsa-mir-4491  
Total reads = 0



**C) PPB Case 14 tumor miRNA sequencing**  
ID=MI0016853\_1;accession\_number=MI0016853;Name=hsa-mir-4491  
Total reads = 0



**D) PPB Case 14 cell line miRNA sequencing**  
ID=MI0016853\_1;accession\_number=MI0016853;Name=hsa-mir-4491  
Total reads = 0



**B) Normal fibroblast miRNA sequencing**  
ID=MI0000742\_1;accession\_number=MI0000742;Name=hsa-mir-34b  
Total reads = 0



**C) PPB Case 14 tumor miRNA sequencing**  
ID=MI0000742\_1;accession\_number=MI0000742;Name=hsa-mir-34b  
Total reads = 0



**D) PPB Case 14 cell line miRNA sequencing**  
ID=MI0000742\_1;accession\_number=MI0000742;Name=hsa-mir-34b  
Total reads = 0



**B) Normal fibroblast miRNA sequencing**  
ID=MI0000743\_1;accession\_number=MI0000743;Name=hsa-mir-34c  
Total reads = 0



**C) PPB Case 14 tumor miRNA sequencing**  
ID=MI0000743\_1;accession\_number=MI0000743;Name=hsa-mir-34c  
Total reads = 0



**D) PPB Case 14 cell line miRNA sequencing**  
ID=MI0000743\_1;accession\_number=MI0000743;Name=hsa-mir-34c  
Total reads = 0



**B) Normal fibroblast miRNA sequencing**  
ID=MI0015828\_1;accession\_number=MI0015828;Name=hsa-mir-4301  
Total reads = 0



**C) PPB Case 14 tumor miRNA sequencing**  
ID=MI0015828\_1;accession\_number=MI0015828;Name=hsa-mir-4301  
Total reads = 0



**D) PPB Case 14 cell line miRNA sequencing**  
ID=MI0015828\_1;accession\_number=MI0015828;Name=hsa-mir-4301  
Total reads = 0



**B) Normal fibroblast miRNA sequencing**  
ID=MI0022550\_1;accession\_number=MI0022550;Name=hsa-mir-6716  
Total reads = 0



**C) PPB Case 14 tumor miRNA sequencing**  
ID=MI0022550\_1;accession\_number=MI0022550;Name=hsa-mir-6716  
Total reads = 0



**D) PPB Case 14 cell line miRNA sequencing**  
ID=MI0022550\_1;accession\_number=MI0022550;Name=hsa-mir-6716  
Total reads = 1





**B) Normal fibroblast miRNA sequencing**  
ID=MI0016854\_1;accession\_number=MI0016854;Name=hsa-mir-4492  
Total reads = 0



**C) PPB Case 14 tumor miRNA sequencing**  
ID=MI0016854\_1;accession\_number=MI0016854;Name=hsa-mir-4492  
Total reads = 0



**D) PPB Case 14 cell line miRNA sequencing**  
ID=MI0016854\_1;accession\_number=MI0016854;Name=hsa-mir-4492  
Total reads = 0



**B) Normal fibroblast miRNA sequencing**  
ID=MI0016056\_1;accession\_number=MI0016056;Name=hsa-mir-3656  
Total reads = 0



**C) PPB Case 14 tumor miRNA sequencing**  
ID=MI0016056\_1;accession\_number=MI0016056;Name=hsa-mir-3656  
Total reads = 0



**D) PPB Case 14 cell line miRNA sequencing**  
ID=MI0016056\_1;accession\_number=MI0016056;Name=hsa-mir-3656  
Total reads = 0



**B) Normal fibroblast miRNA sequencing**  
ID=MI0016855\_1;accession\_number=MI0016855;Name=hsa-mir-4493  
Total reads = 0



**C) PPB Case 14 tumor miRNA sequencing**  
ID=MI0016855\_1;accession\_number=MI0016855;Name=hsa-mir-4493  
Total reads = 0



**D) PPB Case 14 cell line miRNA sequencing**  
ID=MI0016855\_1;accession\_number=MI0016855;Name=hsa-mir-4493  
Total reads = 0



**B) Normal fibroblast miRNA sequencing**  
ID=MI0014198\_1;accession\_number=MI0014198;Name=hsa-mir-3167  
Total reads = 0



**C) PPB Case 14 tumor miRNA sequencing**  
ID=MI0014198\_1;accession\_number=MI0014198;Name=hsa-mir-3167  
Total reads = 0



**D) PPB Case 14 cell line miRNA sequencing**  
ID=MI0014198\_1;accession\_number=MI0014198;Name=hsa-mir-3167  
Total reads = 0



**B) Normal fibroblast miRNA sequencing**  
ID=MI0020367\_1;accession\_number=MI0020367;Name=hsa-mir-6090  
Total reads = 0



**C) PPB Case 14 tumor miRNA sequencing**  
ID=MI0020367\_1;accession\_number=MI0020367;Name=hsa-mir-6090  
Total reads = 0



**D) PPB Case 14 cell line miRNA sequencing**  
ID=MI0020367\_1;accession\_number=MI0020367;Name=hsa-mir-6090  
Total reads = 0



**B) Normal fibroblast miRNA sequencing**  
ID=MI0017330\_1;accession\_number=MI0017330;Name=hsa-mir-4697  
Total reads = 0



**C) PPB Case 14 tumor miRNA sequencing**  
ID=MI0017330\_1;accession\_number=MI0017330;Name=hsa-mir-4697  
Total reads = 0



**D) PPB Case 14 cell line miRNA sequencing**  
ID=MI0017330\_1;accession\_number=MI0017330;Name=hsa-mir-4697  
Total reads = 0



**B) Normal fibroblast miRNA sequencing**  
ID=MI0016049\_1;accession\_number=MI0016049;Name=hsa-mir-3649  
Total reads = 0



**C) PPB Case 14 tumor miRNA sequencing**  
ID=MI0016049\_1;accession\_number=MI0016049;Name=hsa-mir-3649  
Total reads = 0



**D) PPB Case 14 cell line miRNA sequencing**  
ID=MI0016049\_1;accession\_number=MI0016049;Name=hsa-mir-3649  
Total reads = 0



**B) Normal fibroblast miRNA sequencing**  
ID=MI0000650\_1;accession\_number=MI0000650;Name=hsa-mir-200c  
Total reads = 0



**C) PPB Case 14 tumor miRNA sequencing**  
ID=MI0000650\_1;accession\_number=MI0000650;Name=hsa-mir-200c  
Total reads = 0



**D) PPB Case 14 cell line miRNA sequencing**  
ID=MI0000650\_1;accession\_number=MI0000650;Name=hsa-mir-200c  
Total reads = 0





**B) Normal fibroblast miRNA sequencing**  
ID=MI0000457\_1;accession\_number=MI0000457;Name=hsa-mir-141  
Total reads = 0



**C) PPB Case 14 tumor miRNA sequencing**  
ID=MI0000457\_1;accession\_number=MI0000457;Name=hsa-mir-141  
Total reads = 0



**D) PPB Case 14 cell line miRNA sequencing**  
ID=MI0000457\_1;accession\_number=MI0000457;Name=hsa-mir-141  
Total reads = 0



**B) Normal fibroblast miRNA sequencing**  
ID=MI0006379\_1;accession\_number=MI0006379;Name=hsa-mir-1244-1  
Total reads = 0



**C) PPB Case 14 tumor miRNA sequencing**  
ID=MI0006379\_1;accession\_number=MI0006379;Name=hsa-mir-1244-1  
Total reads = 0



**D) PPB Case 14 cell line miRNA sequencing**  
ID=MI0006379\_1;accession\_number=MI0006379;Name=hsa-mir-1244-1  
Total reads = 0



**B) Normal fibroblast miRNA sequencing**  
ID=MI0015974\_1;accession\_number=MI0015974;Name=hsa-mir-1244-2  
Total reads = 0



**C) PPB Case 14 tumor miRNA sequencing**  
ID=MI0015974\_1;accession\_number=MI0015974;Name=hsa-mir-1244-2  
Total reads = 0



**D) PPB Case 14 cell line miRNA sequencing**  
ID=MI0015974\_1;accession\_number=MI0015974;Name=hsa-mir-1244-2  
Total reads = 0



**B) Normal fibroblast miRNA sequencing**  
ID=MI0003626\_1;accession\_number=MI0003626;Name=hsa-mir-613  
Total reads = 0



**C) PPB Case 14 tumor miRNA sequencing**  
ID=MI0003626\_1;accession\_number=MI0003626;Name=hsa-mir-613  
Total reads = 0



**D) PPB Case 14 cell line miRNA sequencing**  
ID=MI0003626\_1;accession\_number=MI0003626;Name=hsa-mir-613  
Total reads = 0



**B) Normal fibroblast miRNA sequencing**  
ID=MI0003627\_1;accession\_number=MI0003627;Name=hsa-mir-614  
Total reads = 0



**C) PPB Case 14 tumor miRNA sequencing**  
ID=MI0003627\_1;accession\_number=MI0003627;Name=hsa-mir-614  
Total reads = 0



**D) PPB Case 14 cell line miRNA sequencing**  
ID=MI0003627\_1;accession\_number=MI0003627;Name=hsa-mir-614  
Total reads = 0



**B) Normal fibroblast miRNA sequencing**  
ID=MI0016992\_1;accession\_number=MI0016992;Name=hsa-mir-3974  
Total reads = 0



**C) PPB Case 14 tumor miRNA sequencing**  
ID=MI0016992\_1;accession\_number=MI0016992;Name=hsa-mir-3974  
Total reads = 0



**D) PPB Case 14 cell line miRNA sequencing**  
ID=MI0016992\_1;accession\_number=MI0016992;Name=hsa-mir-3974  
Total reads = 0



**B) Normal fibroblast miRNA sequencing**  
ID=MI0005712\_1;accession\_number=MI0005712;Name=hsa-mir-920  
Total reads = 0



**C) PPB Case 14 tumor miRNA sequencing**  
ID=MI0005712\_1;accession\_number=MI0005712;Name=hsa-mir-920  
Total reads = 0



**D) PPB Case 14 cell line miRNA sequencing**  
ID=MI0005712\_1;accession\_number=MI0005712;Name=hsa-mir-920  
Total reads = 0



**B) Normal fibroblast miRNA sequencing**  
ID=MI0015833\_1;accession\_number=MI0015833;Name=hsa-mir-4302  
Total reads = 0



**C) PPB Case 14 tumor miRNA sequencing**  
ID=MI0015833\_1;accession\_number=MI0015833;Name=hsa-mir-4302  
Total reads = 0



**D) PPB Case 14 cell line miRNA sequencing**  
ID=MI0015833\_1;accession\_number=MI0015833;Name=hsa-mir-4302  
Total reads = 0





**B) Normal fibroblast miRNA sequencing**  
ID=MI0017331\_1;accession\_number=MI0017331;Name=hsa-mir-4698  
Total reads = 0



**C) PPB Case 14 tumor miRNA sequencing**  
ID=MI0017331\_1;accession\_number=MI0017331;Name=hsa-mir-4698  
Total reads = 0



**D) PPB Case 14 cell line miRNA sequencing**  
ID=MI0017331\_1;accession\_number=MI0017331;Name=hsa-mir-4698  
Total reads = 0



**B) Normal fibroblast miRNA sequencing**  
ID=MI0016856\_1;accession\_number=MI0016856;Name=hsa-mir-4494  
Total reads = 0



**C) PPB Case 14 tumor miRNA sequencing**  
ID=MI0016856\_1;accession\_number=MI0016856;Name=hsa-mir-4494  
Total reads = 0



**D) PPB Case 14 cell line miRNA sequencing**  
ID=MI0016856\_1;accession\_number=MI0016856;Name=hsa-mir-4494  
Total reads = 0



**B) Normal fibroblast miRNA sequencing**  
ID=MI0022217\_1;accession\_number=MI0022217;Name=hsa-mir-6505  
Total reads = 0



**C) PPB Case 14 tumor miRNA sequencing**  
ID=MI0022217\_1;accession\_number=MI0022217;Name=hsa-mir-6505  
Total reads = 0



**D) PPB Case 14 cell line miRNA sequencing**  
ID=MI0022217\_1;accession\_number=MI0022217;Name=hsa-mir-6505  
Total reads = 0



**B) Normal fibroblast miRNA sequencing**  
ID=MI0017334\_1;accession\_number=MI0017334;Name=hsa-mir-4701  
Total reads = 0



**C) PPB Case 14 tumor miRNA sequencing**  
ID=MI0017334\_1;accession\_number=MI0017334;Name=hsa-mir-4701  
Total reads = 0



**D) PPB Case 14 cell line miRNA sequencing**  
ID=MI0017334\_1;accession\_number=MI0017334;Name=hsa-mir-4701  
Total reads = 0



**B) Normal fibroblast miRNA sequencing**  
ID=MI0006355\_1;accession\_number=MI0006355;Name=hsa-mir-1293  
Total reads = 0



**C) PPB Case 14 tumor miRNA sequencing**  
ID=MI0006355\_1;accession\_number=MI0006355;Name=hsa-mir-1293  
Total reads = 0



**D) PPB Case 14 cell line miRNA sequencing**  
ID=MI0006355\_1;accession\_number=MI0006355;Name=hsa-mir-1293  
Total reads = 0



**B) Normal fibroblast miRNA sequencing**  
ID=MI0000279\_1;accession\_number=MI0000279;Name=hsa-mir-196a-2  
Total reads = 0



**C) PPB Case 14 tumor miRNA sequencing**  
ID=MI0000279\_1;accession\_number=MI0000279;Name=hsa-mir-196a-2  
Total reads = 5

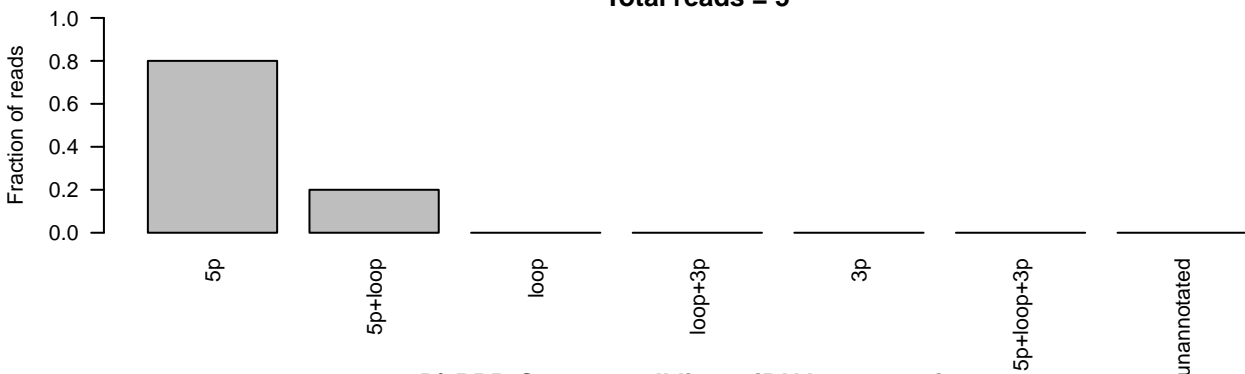

**D) PPB Case 14 cell line miRNA sequencing**  
ID=MI0000279\_1;accession\_number=MI0000279;Name=hsa-mir-196a-2  
Total reads = 0



**B) Normal fibroblast miRNA sequencing**  
ID=MI0003628\_1;accession\_number=MI0003628;Name=hsa-mir-615  
Total reads = 0



**C) PPB Case 14 tumor miRNA sequencing**  
ID=MI0003628\_1;accession\_number=MI0003628;Name=hsa-mir-615  
Total reads = 1

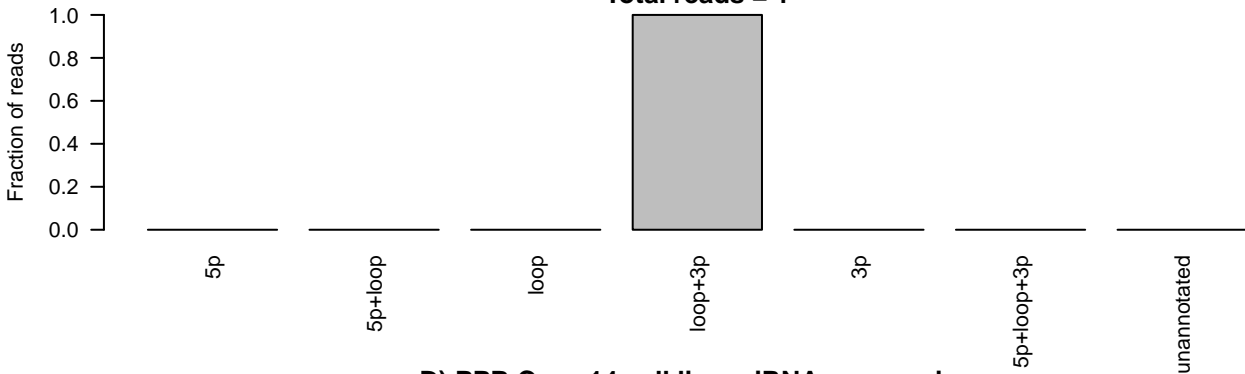

**D) PPB Case 14 cell line miRNA sequencing**  
ID=MI0003628\_1;accession\_number=MI0003628;Name=hsa-mir-615  
Total reads = 0



**B) Normal fibroblast miRNA sequencing**  
ID=MI0017335\_1;accession\_number=MI0017335;Name=hsa-mir-3198-2  
Total reads = 0



**C) PPB Case 14 tumor miRNA sequencing**  
ID=MI0017335\_1;accession\_number=MI0017335;Name=hsa-mir-3198-2  
Total reads = 0



**D) PPB Case 14 cell line miRNA sequencing**  
ID=MI0017335\_1;accession\_number=MI0017335;Name=hsa-mir-3198-2  
Total reads = 0





**B) Normal fibroblast miRNA sequencing**  
ID=MI0006318\_1;accession\_number=MI0006318;Name=hsa-mir-1228  
Total reads = 0



**C) PPB Case 14 tumor miRNA sequencing**  
ID=MI0006318\_1;accession\_number=MI0006318;Name=hsa-mir-1228  
Total reads = 0



**D) PPB Case 14 cell line miRNA sequencing**  
ID=MI0006318\_1;accession\_number=MI0006318;Name=hsa-mir-1228  
Total reads = 0



**B) Normal fibroblast miRNA sequencing**  
ID=MI0003629\_1;accession\_number=MI0003629;Name=hsa-mir-616  
Total reads = 0



**C) PPB Case 14 tumor miRNA sequencing**  
ID=MI0003629\_1;accession\_number=MI0003629;Name=hsa-mir-616  
Total reads = 0



**D) PPB Case 14 cell line miRNA sequencing**  
ID=MI0003629\_1;accession\_number=MI0003629;Name=hsa-mir-616  
Total reads = 0



**B) Normal fibroblast miRNA sequencing**  
ID=MI0021259\_1;accession\_number=MI0021259;Name=hsa-mir-6125  
Total reads = 0



**C) PPB Case 14 tumor miRNA sequencing**  
ID=MI0021259\_1;accession\_number=MI0021259;Name=hsa-mir-6125  
Total reads = 0



**D) PPB Case 14 cell line miRNA sequencing**  
ID=MI0021259\_1;accession\_number=MI0021259;Name=hsa-mir-6125  
Total reads = 0



**B) Normal fibroblast miRNA sequencing**  
ID=MI0016688\_1;accession\_number=MI0016688;Name=hsa-mir-548z  
Total reads = 0



**C) PPB Case 14 tumor miRNA sequencing**  
ID=MI0016688\_1;accession\_number=MI0016688;Name=hsa-mir-548z  
Total reads = 0



**D) PPB Case 14 cell line miRNA sequencing**  
ID=MI0016688\_1;accession\_number=MI0016688;Name=hsa-mir-548z  
Total reads = 0



**B) Normal fibroblast miRNA sequencing**  
ID=MI0003630\_1;accession\_number=MI0003630;Name=hsa-mir-548c  
Total reads = 0



**C) PPB Case 14 tumor miRNA sequencing**  
ID=MI0003630\_1;accession\_number=MI0003630;Name=hsa-mir-548c  
Total reads = 0

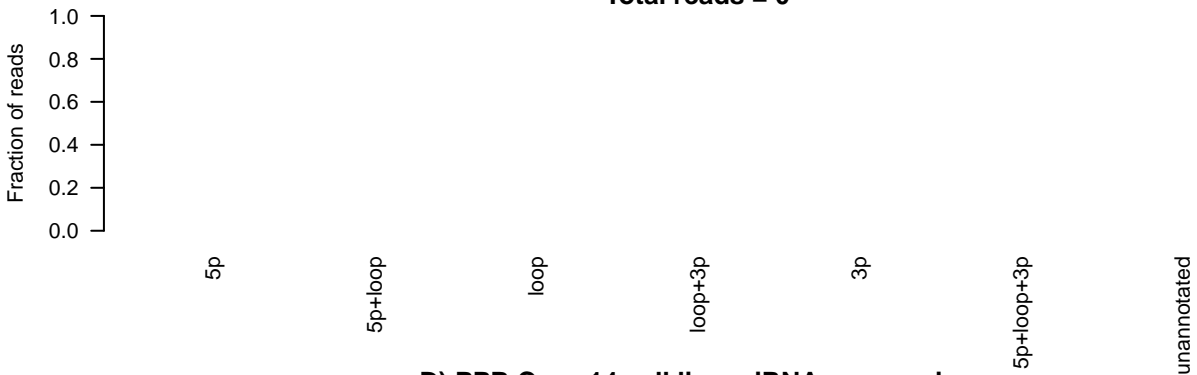

**D) PPB Case 14 cell line miRNA sequencing**  
ID=MI0003630\_1;accession\_number=MI0003630;Name=hsa-mir-548c  
Total reads = 0



**B) Normal fibroblast miRNA sequencing**  
ID=MI0020351\_1;accession\_number=MI0020351;Name=hsa-mir-6074  
Total reads = 0



**C) PPB Case 14 tumor miRNA sequencing**  
ID=MI0020351\_1;accession\_number=MI0020351;Name=hsa-mir-6074  
Total reads = 0



**D) PPB Case 14 cell line miRNA sequencing**  
ID=MI0020351\_1;accession\_number=MI0020351;Name=hsa-mir-6074  
Total reads = 0



**B) Normal fibroblast miRNA sequencing**  
ID=MI0022214\_1;accession\_number=MI0022214;Name=hsa-mir-6502  
Total reads = 0



**C) PPB Case 14 tumor miRNA sequencing**  
ID=MI0022214\_1;accession\_number=MI0022214;Name=hsa-mir-6502  
Total reads = 0



**D) PPB Case 14 cell line miRNA sequencing**  
ID=MI0022214\_1;accession\_number=MI0022214;Name=hsa-mir-6502  
Total reads = 0



**B) Normal fibroblast miRNA sequencing**  
ID=MI0006426\_1;accession\_number=MI0006426;Name=hsa-mir-1279  
Total reads = 0



**C) PPB Case 14 tumor miRNA sequencing**  
ID=MI0006426\_1;accession\_number=MI0006426;Name=hsa-mir-1279  
Total reads = 0



**D) PPB Case 14 cell line miRNA sequencing**  
ID=MI0006426\_1;accession\_number=MI0006426;Name=hsa-mir-1279  
Total reads = 0





**B) Normal fibroblast miRNA sequencing**  
ID=MI0016417\_1;accession\_number=MI0016417;Name=hsa-mir-3913-1  
Total reads = 0



**C) PPB Case 14 tumor miRNA sequencing**  
ID=MI0016417\_1;accession\_number=MI0016417;Name=hsa-mir-3913-1  
Total reads = 3

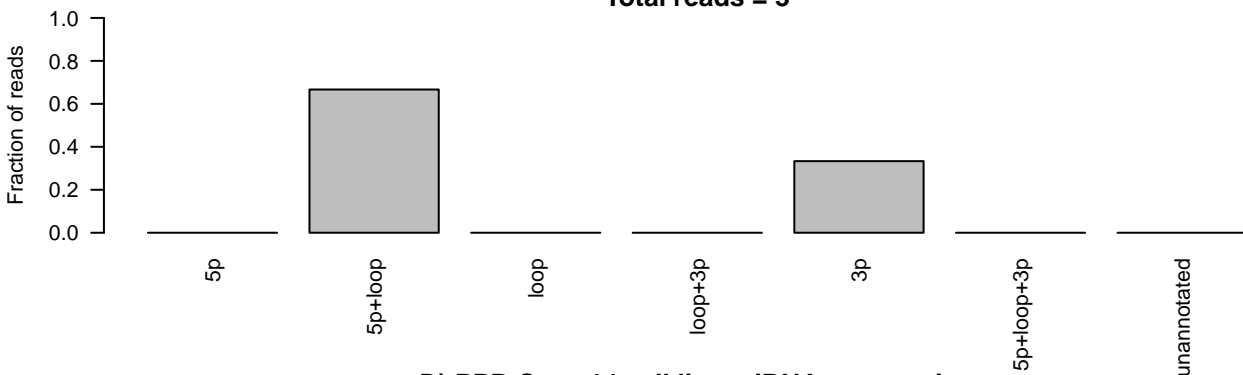

**D) PPB Case 14 cell line miRNA sequencing**  
ID=MI0016417\_1;accession\_number=MI0016417;Name=hsa-mir-3913-1  
Total reads = 0



**B) Normal fibroblast miRNA sequencing**  
ID=MI0016418\_1;accession\_number=MI0016418;Name=hsa-mir-3913-2  
Total reads = 0



**C) PPB Case 14 tumor miRNA sequencing**  
ID=MI0016418\_1;accession\_number=MI0016418;Name=hsa-mir-3913-2  
Total reads = 3

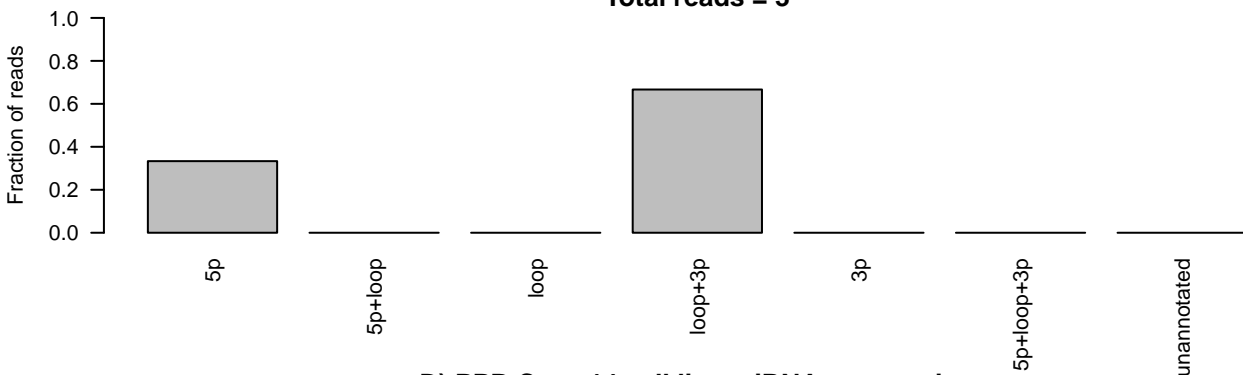

**D) PPB Case 14 cell line miRNA sequencing**  
ID=MI0016418\_1;accession\_number=MI0016418;Name=hsa-mir-3913-2  
Total reads = 0



**B) Normal fibroblast miRNA sequencing**  
ID=MI0006434\_1;accession\_number=MI0006434;Name=hsa-mir-1252  
Total reads = 0



**C) PPB Case 14 tumor miRNA sequencing**  
ID=MI0006434\_1;accession\_number=MI0006434;Name=hsa-mir-1252  
Total reads = 0



**D) PPB Case 14 cell line miRNA sequencing**  
ID=MI0006434\_1;accession\_number=MI0006434;Name=hsa-mir-1252  
Total reads = 0



**B) Normal fibroblast miRNA sequencing**  
ID=MI0003631\_1;accession\_number=MI0003631;Name=hsa-mir-617  
Total reads = 0



**C) PPB Case 14 tumor miRNA sequencing**  
ID=MI0003631\_1;accession\_number=MI0003631;Name=hsa-mir-617  
Total reads = 0



**D) PPB Case 14 cell line miRNA sequencing**  
ID=MI0003631\_1;accession\_number=MI0003631;Name=hsa-mir-617  
Total reads = 0



**B) Normal fibroblast miRNA sequencing**  
ID=MI0003632\_1;accession\_number=MI0003632;Name=hsa-mir-618  
Total reads = 0



**C) PPB Case 14 tumor miRNA sequencing**  
ID=MI0003632\_1;accession\_number=MI0003632;Name=hsa-mir-618  
Total reads = 0



**D) PPB Case 14 cell line miRNA sequencing**  
ID=MI0003632\_1;accession\_number=MI0003632;Name=hsa-mir-618  
Total reads = 0



**B) Normal fibroblast miRNA sequencing**  
ID=MI0017332\_1;accession\_number=MI0017332;Name=hsa-mir-4699  
Total reads = 0



**C) PPB Case 14 tumor miRNA sequencing**  
ID=MI0017332\_1;accession\_number=MI0017332;Name=hsa-mir-4699  
Total reads = 0



**D) PPB Case 14 cell line miRNA sequencing**  
ID=MI0017332\_1;accession\_number=MI0017332;Name=hsa-mir-4699  
Total reads = 0



**B) Normal fibroblast miRNA sequencing**  
ID=MI0019307\_1;accession\_number=MI0019307;Name=hsa-mir-5700  
Total reads = 0



**C) PPB Case 14 tumor miRNA sequencing**  
ID=MI0019307\_1;accession\_number=MI0019307;Name=hsa-mir-5700  
Total reads = 0



**D) PPB Case 14 cell line miRNA sequencing**  
ID=MI0019307\_1;accession\_number=MI0019307;Name=hsa-mir-5700  
Total reads = 0



**B) Normal fibroblast miRNA sequencing**  
ID=MI0003131\_1;accession\_number=MI0003131;Name=hsa-mir-492  
Total reads = 0



**C) PPB Case 14 tumor miRNA sequencing**  
ID=MI0003131\_1;accession\_number=MI0003131;Name=hsa-mir-492  
Total reads = 0



**D) PPB Case 14 cell line miRNA sequencing**  
ID=MI0003131\_1;accession\_number=MI0003131;Name=hsa-mir-492  
Total reads = 0





**B) Normal fibroblast miRNA sequencing**  
ID=MI0016086\_1;accession\_number=MI0016086;Name=hsa-mir-3685  
Total reads = 0



**C) PPB Case 14 tumor miRNA sequencing**  
ID=MI0016086\_1;accession\_number=MI0016086;Name=hsa-mir-3685  
Total reads = 0



**D) PPB Case 14 cell line miRNA sequencing**  
ID=MI0016086\_1;accession\_number=MI0016086;Name=hsa-mir-3685  
Total reads = 0



**B) Normal fibroblast miRNA sequencing**  
ID=MI0006386\_1;accession\_number=MI0006386;Name=hsa-mir-1251  
Total reads = 0



**C) PPB Case 14 tumor miRNA sequencing**  
ID=MI0006386\_1;accession\_number=MI0006386;Name=hsa-mir-1251  
Total reads = 0



**D) PPB Case 14 cell line miRNA sequencing**  
ID=MI0006386\_1;accession\_number=MI0006386;Name=hsa-mir-1251  
Total reads = 0



**B) Normal fibroblast miRNA sequencing**  
ID=MI0000453\_1;accession\_number=MI0000453;Name=hsa-mir-135a-2  
Total reads = 0



**C) PPB Case 14 tumor miRNA sequencing**  
ID=MI0000453\_1;accession\_number=MI0000453;Name=hsa-mir-135a-2  
Total reads = 0



**D) PPB Case 14 cell line miRNA sequencing**  
ID=MI0000453\_1;accession\_number=MI0000453;Name=hsa-mir-135a-2  
Total reads = 0



**B) Normal fibroblast miRNA sequencing**  
ID=MI0016857\_1;accession\_number=MI0016857;Name=hsa-mir-4495  
Total reads = 0



**C) PPB Case 14 tumor miRNA sequencing**  
ID=MI0016857\_1;accession\_number=MI0016857;Name=hsa-mir-4495  
Total reads = 0



**D) PPB Case 14 cell line miRNA sequencing**  
ID=MI0016857\_1;accession\_number=MI0016857;Name=hsa-mir-4495  
Total reads = 0



**B) Normal fibroblast miRNA sequencing**  
ID=MI0015834\_1;accession\_number=MI0015834;Name=hsa-mir-4303  
Total reads = 0



**C) PPB Case 14 tumor miRNA sequencing**  
ID=MI0015834\_1;accession\_number=MI0015834;Name=hsa-mir-4303  
Total reads = 0



**D) PPB Case 14 cell line miRNA sequencing**  
ID=MI0015834\_1;accession\_number=MI0015834;Name=hsa-mir-4303  
Total reads = 0



**B) Normal fibroblast miRNA sequencing**  
ID=MI0008195\_1;accession\_number=MI0008195;Name=hsa-mir-1827  
Total reads = 0



**C) PPB Case 14 tumor miRNA sequencing**  
ID=MI0008195\_1;accession\_number=MI0008195;Name=hsa-mir-1827  
Total reads = 0



**D) PPB Case 14 cell line miRNA sequencing**  
ID=MI0008195\_1;accession\_number=MI0008195;Name=hsa-mir-1827  
Total reads = 0



**B) Normal fibroblast miRNA sequencing**  
ID=MI0016052\_1;accession\_number=MI0016052;Name=hsa-mir-3652  
Total reads = 0



**C) PPB Case 14 tumor miRNA sequencing**  
ID=MI0016052\_1;accession\_number=MI0016052;Name=hsa-mir-3652  
Total reads = 0



**D) PPB Case 14 cell line miRNA sequencing**  
ID=MI0016052\_1;accession\_number=MI0016052;Name=hsa-mir-3652  
Total reads = 0



**B) Normal fibroblast miRNA sequencing**  
ID=MI0016429\_1;accession\_number=MI0016429;Name=hsa-mir-3922  
Total reads = 0



**C) PPB Case 14 tumor miRNA sequencing**  
ID=MI0016429\_1;accession\_number=MI0016429;Name=hsa-mir-3922  
Total reads = 0



**D) PPB Case 14 cell line miRNA sequencing**  
ID=MI0016429\_1;accession\_number=MI0016429;Name=hsa-mir-3922  
Total reads = 0





**B) Normal fibroblast miRNA sequencing**  
ID=MI0016858\_1;accession\_number=MI0016858;Name=hsa-mir-4496  
Total reads = 0



**C) PPB Case 14 tumor miRNA sequencing**  
ID=MI0016858\_1;accession\_number=MI0016858;Name=hsa-mir-4496  
Total reads = 0



**D) PPB Case 14 cell line miRNA sequencing**  
ID=MI0016858\_1;accession\_number=MI0016858;Name=hsa-mir-4496  
Total reads = 0



**B) Normal fibroblast miRNA sequencing**  
ID=MI0003633\_1;accession\_number=MI0003633;Name=hsa-mir-619  
Total reads = 0



**C) PPB Case 14 tumor miRNA sequencing**  
ID=MI0003633\_1;accession\_number=MI0003633;Name=hsa-mir-619  
Total reads = 0



**D) PPB Case 14 cell line miRNA sequencing**  
ID=MI0003633\_1;accession\_number=MI0003633;Name=hsa-mir-619  
Total reads = 0



**B) Normal fibroblast miRNA sequencing**  
ID=MI0016859\_1;accession\_number=MI0016859;Name=hsa-mir-4497  
Total reads = 0



**C) PPB Case 14 tumor miRNA sequencing**  
ID=MI0016859\_1;accession\_number=MI0016859;Name=hsa-mir-4497  
Total reads = 0



**D) PPB Case 14 cell line miRNA sequencing**  
ID=MI0016859\_1;accession\_number=MI0016859;Name=hsa-mir-4497  
Total reads = 0



**B) Normal fibroblast miRNA sequencing**  
ID=MI0016057\_1;accession\_number=MI0016057;Name=hsa-mir-3657  
Total reads = 0



**C) PPB Case 14 tumor miRNA sequencing**  
ID=MI0016057\_1;accession\_number=MI0016057;Name=hsa-mir-3657  
Total reads = 0



**D) PPB Case 14 cell line miRNA sequencing**  
ID=MI0016057\_1;accession\_number=MI0016057;Name=hsa-mir-3657  
Total reads = 0



**B) Normal fibroblast miRNA sequencing**  
ID=MI0006362\_1;accession\_number=MI0006362;Name=hsa-mir-1302-1  
Total reads = 0



**C) PPB Case 14 tumor miRNA sequencing**  
ID=MI0006362\_1;accession\_number=MI0006362;Name=hsa-mir-1302-1  
Total reads = 0

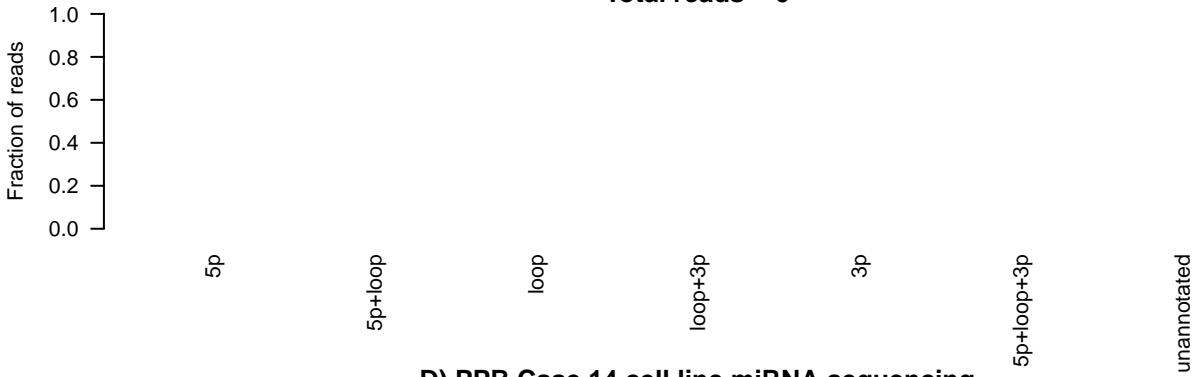

**D) PPB Case 14 cell line miRNA sequencing**  
ID=MI0006362\_1;accession\_number=MI0006362;Name=hsa-mir-1302-1  
Total reads = 0



**B) Normal fibroblast miRNA sequencing**  
ID=MI0003634\_1;accession\_number=MI0003634;Name=hsa-mir-620  
Total reads = 0



**C) PPB Case 14 tumor miRNA sequencing**  
ID=MI0003634\_1;accession\_number=MI0003634;Name=hsa-mir-620  
Total reads = 0



**D) PPB Case 14 cell line miRNA sequencing**  
ID=MI0003634\_1;accession\_number=MI0003634;Name=hsa-mir-620  
Total reads = 0



**B) Normal fibroblast miRNA sequencing**  
ID=MI0016824\_1;accession\_number=MI0016824;Name=hsa-mir-4472-2  
Total reads = 0



**C) PPB Case 14 tumor miRNA sequencing**  
ID=MI0016824\_1;accession\_number=MI0016824;Name=hsa-mir-4472-2  
Total reads = 0



**D) PPB Case 14 cell line miRNA sequencing**  
ID=MI0016824\_1;accession\_number=MI0016824;Name=hsa-mir-4472-2  
Total reads = 0



**B) Normal fibroblast miRNA sequencing**  
ID=MI0006271\_1;accession\_number=MI0006271;Name=hsa-mir-1178  
Total reads = 0



**C) PPB Case 14 tumor miRNA sequencing**  
ID=MI0006271\_1;accession\_number=MI0006271;Name=hsa-mir-1178  
Total reads = 0



**D) PPB Case 14 cell line miRNA sequencing**  
ID=MI0006271\_1;accession\_number=MI0006271;Name=hsa-mir-1178  
Total reads = 0





**B) Normal fibroblast miRNA sequencing**  
ID=MI0016860\_1;accession\_number=MI0016860;Name=hsa-mir-4498  
Total reads = 0



**C) PPB Case 14 tumor miRNA sequencing**  
ID=MI0016860\_1;accession\_number=MI0016860;Name=hsa-mir-4498  
Total reads = 0



**D) PPB Case 14 cell line miRNA sequencing**  
ID=MI0016860\_1;accession\_number=MI0016860;Name=hsa-mir-4498  
Total reads = 0



**B) Normal fibroblast miRNA sequencing**  
ID=MI0017333\_1;accession\_number=MI0017333;Name=hsa-mir-4700  
Total reads = 0



**C) PPB Case 14 tumor miRNA sequencing**  
ID=MI0017333\_1;accession\_number=MI0017333;Name=hsa-mir-4700  
Total reads = 0



**D) PPB Case 14 cell line miRNA sequencing**  
ID=MI0017333\_1;accession\_number=MI0017333;Name=hsa-mir-4700  
Total reads = 0



**B) Normal fibroblast miRNA sequencing**  
ID=MI0015832\_1;accession\_number=MI0015832;Name=hsa-mir-4304  
Total reads = 0



**C) PPB Case 14 tumor miRNA sequencing**  
ID=MI0015832\_1;accession\_number=MI0015832;Name=hsa-mir-4304  
Total reads = 0

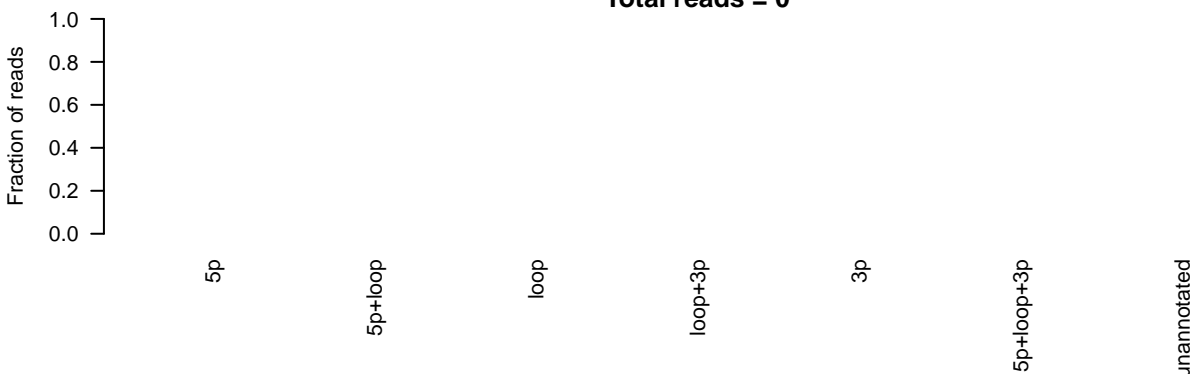

**D) PPB Case 14 cell line miRNA sequencing**  
ID=MI0015832\_1;accession\_number=MI0015832;Name=hsa-mir-4304  
Total reads = 0

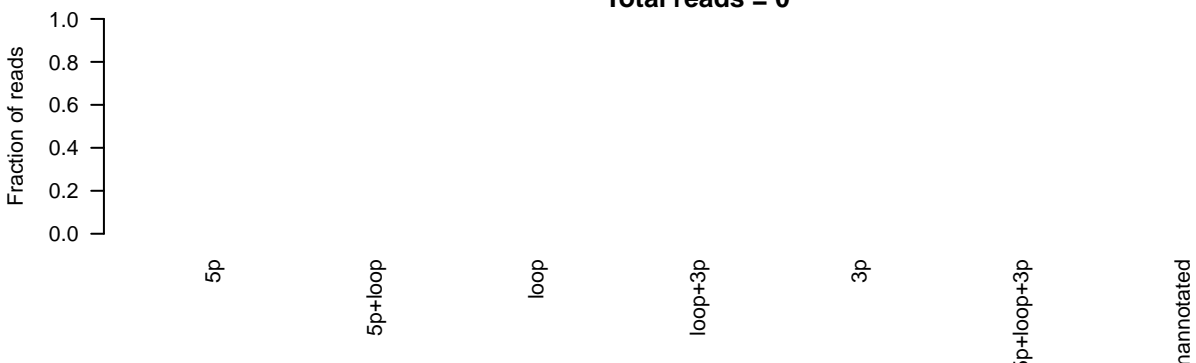

**B) Normal fibroblast miRNA sequencing**  
ID=MI0016412\_1;accession\_number=MI0016412;Name=hsa-mir-3908  
Total reads = 0



**C) PPB Case 14 tumor miRNA sequencing**  
ID=MI0016412\_1;accession\_number=MI0016412;Name=hsa-mir-3908  
Total reads = 0



**D) PPB Case 14 cell line miRNA sequencing**  
ID=MI0016412\_1;accession\_number=MI0016412;Name=hsa-mir-3908  
Total reads = 0



**B) Normal fibroblast miRNA sequencing**  
ID=MI0018167\_1;accession\_number=MI0018167;Name=hsa-mir-5188  
Total reads = 0



**C) PPB Case 14 tumor miRNA sequencing**  
ID=MI0018167\_1;accession\_number=MI0018167;Name=hsa-mir-5188  
Total reads = 0



**D) PPB Case 14 cell line miRNA sequencing**  
ID=MI0018167\_1;accession\_number=MI0018167;Name=hsa-mir-5188  
Total reads = 0



**B) Normal fibroblast miRNA sequencing**  
ID=MI0016861\_1;accession\_number=MI0016861;Name=hsa-mir-4419b  
Total reads = 0



**C) PPB Case 14 tumor miRNA sequencing**  
ID=MI0016861\_1;accession\_number=MI0016861;Name=hsa-mir-4419b  
Total reads = 0



**D) PPB Case 14 cell line miRNA sequencing**  
ID=MI0016861\_1;accession\_number=MI0016861;Name=hsa-mir-4419b  
Total reads = 0



**B) Normal fibroblast miRNA sequencing**  
ID=MI0016002\_1;accession\_number=MI0016002;Name=hsa-mir-3612  
Total reads = 0



**C) PPB Case 14 tumor miRNA sequencing**  
ID=MI0016002\_1;accession\_number=MI0016002;Name=hsa-mir-3612  
Total reads = 0



**D) PPB Case 14 cell line miRNA sequencing**  
ID=MI0016002\_1;accession\_number=MI0016002;Name=hsa-mir-3612  
Total reads = 0



**B) Normal fibroblast miRNA sequencing**  
ID=MI0016862\_1;accession\_number=MI0016862;Name=hsa-mir-4499  
Total reads = 0



**C) PPB Case 14 tumor miRNA sequencing**  
ID=MI0016862\_1;accession\_number=MI0016862;Name=hsa-mir-4499  
Total reads = 0



**D) PPB Case 14 cell line miRNA sequencing**  
ID=MI0016862\_1;accession\_number=MI0016862;Name=hsa-mir-4499  
Total reads = 0





**B) Normal fibroblast miRNA sequencing**  
ID=MI0011282\_1;accession\_number=MI0011282;Name=hsa-mir-2276  
Total reads = 0



**C) PPB Case 14 tumor miRNA sequencing**  
ID=MI0011282\_1;accession\_number=MI0011282;Name=hsa-mir-2276  
Total reads = 0



**D) PPB Case 14 cell line miRNA sequencing**  
ID=MI0011282\_1;accession\_number=MI0011282;Name=hsa-mir-2276  
Total reads = 0



**B) Normal fibroblast miRNA sequencing**  
ID=MI0015835\_1;accession\_number=MI0015835;Name=hsa-mir-4305  
Total reads = 0



**C) PPB Case 14 tumor miRNA sequencing**  
ID=MI0015835\_1;accession\_number=MI0015835;Name=hsa-mir-4305  
Total reads = 0



**D) PPB Case 14 cell line miRNA sequencing**  
ID=MI0015835\_1;accession\_number=MI0015835;Name=hsa-mir-4305  
Total reads = 0



**B) Normal fibroblast miRNA sequencing**  
ID=MI0008190\_1;accession\_number=MI0008190;Name=hsa-mir-320d-1  
Total reads = 0



**C) PPB Case 14 tumor miRNA sequencing**  
ID=MI0008190\_1;accession\_number=MI0008190;Name=hsa-mir-320d-1  
Total reads = 0



**D) PPB Case 14 cell line miRNA sequencing**  
ID=MI0008190\_1;accession\_number=MI0008190;Name=hsa-mir-320d-1  
Total reads = 0



**B) Normal fibroblast miRNA sequencing**  
ID=MI0003635\_1;accession\_number=MI0003635;Name=hsa-mir-621  
Total reads = 0



**C) PPB Case 14 tumor miRNA sequencing**  
ID=MI0003635\_1;accession\_number=MI0003635;Name=hsa-mir-621  
Total reads = 0



**D) PPB Case 14 cell line miRNA sequencing**  
ID=MI0003635\_1;accession\_number=MI0003635;Name=hsa-mir-621  
Total reads = 0



**B) Normal fibroblast miRNA sequencing**  
ID=MI0014199\_1;accession\_number=MI0014199;Name=hsa-mir-3168  
Total reads = 0



**C) PPB Case 14 tumor miRNA sequencing**  
ID=MI0014199\_1;accession\_number=MI0014199;Name=hsa-mir-3168  
Total reads = 0



**D) PPB Case 14 cell line miRNA sequencing**  
ID=MI0014199\_1;accession\_number=MI0014199;Name=hsa-mir-3168  
Total reads = 0



**B) Normal fibroblast miRNA sequencing**  
ID=MI0017873\_1;accession\_number=MI0017873;Name=hsa-mir-5006  
Total reads = 0



**C) PPB Case 14 tumor miRNA sequencing**  
ID=MI0017873\_1;accession\_number=MI0017873;Name=hsa-mir-5006  
Total reads = 0



**D) PPB Case 14 cell line miRNA sequencing**  
ID=MI0017873\_1;accession\_number=MI0017873;Name=hsa-mir-5006  
Total reads = 0



**B) Normal fibroblast miRNA sequencing**  
ID=MI0019300\_1;accession\_number=MI0019300;Name=hsa-mir-5693  
Total reads = 0



**C) PPB Case 14 tumor miRNA sequencing**  
ID=MI0019300\_1;accession\_number=MI0019300;Name=hsa-mir-5693  
Total reads = 0



**D) PPB Case 14 cell line miRNA sequencing**  
ID=MI0019300\_1;accession\_number=MI0019300;Name=hsa-mir-5693  
Total reads = 0



**B) Normal fibroblast miRNA sequencing**  
ID=MI0017336\_1;accession\_number=MI0017336;Name=hsa-mir-4703  
Total reads = 0



**C) PPB Case 14 tumor miRNA sequencing**  
ID=MI0017336\_1;accession\_number=MI0017336;Name=hsa-mir-4703  
Total reads = 0



**D) PPB Case 14 cell line miRNA sequencing**  
ID=MI0017336\_1;accession\_number=MI0017336;Name=hsa-mir-4703  
Total reads = 0





**B) Normal fibroblast miRNA sequencing**  
ID=MI0004065\_1;accession\_number=MI0004065;Name=hsa-mir-759  
Total reads = 0



**C) PPB Case 14 tumor miRNA sequencing**  
ID=MI0004065\_1;accession\_number=MI0004065;Name=hsa-mir-759  
Total reads = 0



**D) PPB Case 14 cell line miRNA sequencing**  
ID=MI0004065\_1;accession\_number=MI0004065;Name=hsa-mir-759  
Total reads = 0



**B) Normal fibroblast miRNA sequencing**  
ID=MI0006358\_1;accession\_number=MI0006358;Name=hsa-mir-1297  
Total reads = 0



**C) PPB Case 14 tumor miRNA sequencing**  
ID=MI0006358\_1;accession\_number=MI0006358;Name=hsa-mir-1297  
Total reads = 0



**D) PPB Case 14 cell line miRNA sequencing**  
ID=MI0006358\_1;accession\_number=MI0006358;Name=hsa-mir-1297  
Total reads = 0



**B) Normal fibroblast miRNA sequencing**  
ID=MI0017874\_1;accession\_number=MI0017874;Name=hsa-mir-5007  
Total reads = 0



**C) PPB Case 14 tumor miRNA sequencing**  
ID=MI0017874\_1;accession\_number=MI0017874;Name=hsa-mir-5007  
Total reads = 0



**D) PPB Case 14 cell line miRNA sequencing**  
ID=MI0017874\_1;accession\_number=MI0017874;Name=hsa-mir-5007  
Total reads = 0



**B) Normal fibroblast miRNA sequencing**  
ID=MI0014200\_1;accession\_number=MI0014200;Name=hsa-mir-3169  
Total reads = 0



**C) PPB Case 14 tumor miRNA sequencing**  
ID=MI0014200\_1;accession\_number=MI0014200;Name=hsa-mir-3169  
Total reads = 0



**D) PPB Case 14 cell line miRNA sequencing**  
ID=MI0014200\_1;accession\_number=MI0014200;Name=hsa-mir-3169  
Total reads = 0



**B) Normal fibroblast miRNA sequencing**  
ID=MI0016833\_1;accession\_number=MI0016833;Name=hsa-mir-548x-2  
Total reads = 0



**C) PPB Case 14 tumor miRNA sequencing**  
ID=MI0016833\_1;accession\_number=MI0016833;Name=hsa-mir-548x-2  
Total reads = 0



**D) PPB Case 14 cell line miRNA sequencing**  
ID=MI0016833\_1;accession\_number=MI0016833;Name=hsa-mir-548x-2  
Total reads = 0



**B) Normal fibroblast miRNA sequencing**  
ID=MI0017337\_1;accession\_number=MI0017337;Name=hsa-mir-4704  
Total reads = 0



**C) PPB Case 14 tumor miRNA sequencing**  
ID=MI0017337\_1;accession\_number=MI0017337;Name=hsa-mir-4704  
Total reads = 0



**D) PPB Case 14 cell line miRNA sequencing**  
ID=MI0017337\_1;accession\_number=MI0017337;Name=hsa-mir-4704  
Total reads = 0



**B) Normal fibroblast miRNA sequencing**  
ID=MI0016066\_1;accession\_number=MI0016066;Name=hsa-mir-3665  
Total reads = 0



**C) PPB Case 14 tumor miRNA sequencing**  
ID=MI0016066\_1;accession\_number=MI0016066;Name=hsa-mir-3665  
Total reads = 0



**D) PPB Case 14 cell line miRNA sequencing**  
ID=MI0016066\_1;accession\_number=MI0016066;Name=hsa-mir-3665  
Total reads = 0



**B) Normal fibroblast miRNA sequencing**  
ID=MI0016863\_1;accession\_number=MI0016863;Name=hsa-mir-4500  
Total reads = 0



**C) PPB Case 14 tumor miRNA sequencing**  
ID=MI0016863\_1;accession\_number=MI0016863;Name=hsa-mir-4500  
Total reads = 0



**D) PPB Case 14 cell line miRNA sequencing**  
ID=MI0016863\_1;accession\_number=MI0016863;Name=hsa-mir-4500  
Total reads = 0





**B) Normal fibroblast miRNA sequencing**  
ID=MI0003636\_1;accession\_number=MI0003636;Name=hsa-mir-622  
Total reads = 0



**C) PPB Case 14 tumor miRNA sequencing**  
ID=MI0003636\_1;accession\_number=MI0003636;Name=hsa-mir-622  
Total reads = 0



**D) PPB Case 14 cell line miRNA sequencing**  
ID=MI0003636\_1;accession\_number=MI0003636;Name=hsa-mir-622  
Total reads = 0



**B) Normal fibroblast miRNA sequencing**  
ID=MI0019132\_1;accession\_number=MI0019132;Name=hsa-mir-548as  
Total reads = 0



**C) PPB Case 14 tumor miRNA sequencing**  
ID=MI0019132\_1;accession\_number=MI0019132;Name=hsa-mir-548as  
Total reads = 0



**D) PPB Case 14 cell line miRNA sequencing**  
ID=MI0019132\_1;accession\_number=MI0019132;Name=hsa-mir-548as  
Total reads = 0



**B) Normal fibroblast miRNA sequencing**  
ID=MI0016864\_1;accession\_number=MI0016864;Name=hsa-mir-4501  
Total reads = 0



**C) PPB Case 14 tumor miRNA sequencing**  
ID=MI0016864\_1;accession\_number=MI0016864;Name=hsa-mir-4501  
Total reads = 0



**D) PPB Case 14 cell line miRNA sequencing**  
ID=MI0016864\_1;accession\_number=MI0016864;Name=hsa-mir-4501  
Total reads = 0



**B) Normal fibroblast miRNA sequencing**  
ID=MI0014201\_1;accession\_number=MI0014201;Name=hsa-mir-3170  
Total reads = 0



**C) PPB Case 14 tumor miRNA sequencing**  
ID=MI0014201\_1;accession\_number=MI0014201;Name=hsa-mir-3170  
Total reads = 0



**D) PPB Case 14 cell line miRNA sequencing**  
ID=MI0014201\_1;accession\_number=MI0014201;Name=hsa-mir-3170  
Total reads = 0



**B) Normal fibroblast miRNA sequencing**  
ID=MI0003637\_1;accession\_number=MI0003637;Name=hsa-mir-623  
Total reads = 0



**C) PPB Case 14 tumor miRNA sequencing**  
ID=MI0003637\_1;accession\_number=MI0003637;Name=hsa-mir-623  
Total reads = 0



**D) PPB Case 14 cell line miRNA sequencing**  
ID=MI0003637\_1;accession\_number=MI0003637;Name=hsa-mir-623  
Total reads = 0



**B) Normal fibroblast miRNA sequencing**  
ID=MI0015836\_1;accession\_number=MI0015836;Name=hsa-mir-4306  
Total reads = 0



**C) PPB Case 14 tumor miRNA sequencing**  
ID=MI0015836\_1;accession\_number=MI0015836;Name=hsa-mir-4306  
Total reads = 0



**D) PPB Case 14 cell line miRNA sequencing**  
ID=MI0015836\_1;accession\_number=MI0015836;Name=hsa-mir-4306  
Total reads = 0



**B) Normal fibroblast miRNA sequencing**  
ID=MI0012062\_1;accession\_number=MI0012062;Name=hsa-mir-2681  
Total reads = 0



**C) PPB Case 14 tumor miRNA sequencing**  
ID=MI0012062\_1;accession\_number=MI0012062;Name=hsa-mir-2681  
Total reads = 0



**D) PPB Case 14 cell line miRNA sequencing**  
ID=MI0012062\_1;accession\_number=MI0012062;Name=hsa-mir-2681  
Total reads = 0



**B) Normal fibroblast miRNA sequencing**  
ID=MI0017338\_1;accession\_number=MI0017338;Name=hsa-mir-4705  
Total reads = 0



**C) PPB Case 14 tumor miRNA sequencing**  
ID=MI0017338\_1;accession\_number=MI0017338;Name=hsa-mir-4705  
Total reads = 0



**D) PPB Case 14 cell line miRNA sequencing**  
ID=MI0017338\_1;accession\_number=MI0017338;Name=hsa-mir-4705  
Total reads = 0





**B) Normal fibroblast miRNA sequencing**  
ID=MI0006404\_1;accession\_number=MI0006404;Name=hsa-mir-1267  
Total reads = 0



**C) PPB Case 14 tumor miRNA sequencing**  
ID=MI0006404\_1;accession\_number=MI0006404;Name=hsa-mir-1267  
Total reads = 0



**D) PPB Case 14 cell line miRNA sequencing**  
ID=MI0006404\_1;accession\_number=MI0006404;Name=hsa-mir-1267  
Total reads = 0



**B) Normal fibroblast miRNA sequencing**  
ID=MI0019131\_1;accession\_number=MI0019131;Name=hsa-mir-548ar  
Total reads = 0



**C) PPB Case 14 tumor miRNA sequencing**  
ID=MI0019131\_1;accession\_number=MI0019131;Name=hsa-mir-548ar  
Total reads = 0



**D) PPB Case 14 cell line miRNA sequencing**  
ID=MI0019131\_1;accession\_number=MI0019131;Name=hsa-mir-548ar  
Total reads = 0



**B) Normal fibroblast miRNA sequencing**  
ID=MI0016865\_1;accession\_number=MI0016865;Name=hsa-mir-4502  
Total reads = 0



**C) PPB Case 14 tumor miRNA sequencing**  
ID=MI0016865\_1;accession\_number=MI0016865;Name=hsa-mir-4502  
Total reads = 0



**D) PPB Case 14 cell line miRNA sequencing**  
ID=MI0016865\_1;accession\_number=MI0016865;Name=hsa-mir-4502  
Total reads = 0



**B) Normal fibroblast miRNA sequencing**  
ID=MI0022551\_1;accession\_number=MI0022551;Name=hsa-mir-6717  
Total reads = 0



**C) PPB Case 14 tumor miRNA sequencing**  
ID=MI0022551\_1;accession\_number=MI0022551;Name=hsa-mir-6717  
Total reads = 0



**D) PPB Case 14 cell line miRNA sequencing**  
ID=MI0022551\_1;accession\_number=MI0022551;Name=hsa-mir-6717  
Total reads = 0



**B) Normal fibroblast miRNA sequencing**  
ID=MI0017340\_1;accession\_number=MI0017340;Name=hsa-mir-4707  
Total reads = 0



**C) PPB Case 14 tumor miRNA sequencing**  
ID=MI0017340\_1;accession\_number=MI0017340;Name=hsa-mir-4707  
Total reads = 0



**D) PPB Case 14 cell line miRNA sequencing**  
ID=MI0017340\_1;accession\_number=MI0017340;Name=hsa-mir-4707  
Total reads = 0



**B) Normal fibroblast miRNA sequencing**  
ID=MI0000251\_1;accession\_number=MI0000251;Name=hsa-mir-208a  
Total reads = 0



**C) PPB Case 14 tumor miRNA sequencing**  
ID=MI0000251\_1;accession\_number=MI0000251;Name=hsa-mir-208a  
Total reads = 0



**D) PPB Case 14 cell line miRNA sequencing**  
ID=MI0000251\_1;accession\_number=MI0000251;Name=hsa-mir-208a  
Total reads = 0



**B) Normal fibroblast miRNA sequencing**  
ID=MI0005570\_1;accession\_number=MI0005570;Name=hsa-mir-208b  
Total reads = 0



**C) PPB Case 14 tumor miRNA sequencing**  
ID=MI0005570\_1;accession\_number=MI0005570;Name=hsa-mir-208b  
Total reads = 0



**D) PPB Case 14 cell line miRNA sequencing**  
ID=MI0005570\_1;accession\_number=MI0005570;Name=hsa-mir-208b  
Total reads = 0



**B) Normal fibroblast miRNA sequencing**  
ID=MI0015838\_1;accession\_number=MI0015838;Name=hsa-mir-4307  
Total reads = 0



**C) PPB Case 14 tumor miRNA sequencing**  
ID=MI0015838\_1;accession\_number=MI0015838;Name=hsa-mir-4307  
Total reads = 0



**D) PPB Case 14 cell line miRNA sequencing**  
ID=MI0015838\_1;accession\_number=MI0015838;Name=hsa-mir-4307  
Total reads = 0





**B) Normal fibroblast miRNA sequencing**  
ID=MI0014202\_1;accession\_number=MI0014202;Name=hsa-mir-3171  
Total reads = 0



**C) PPB Case 14 tumor miRNA sequencing**  
ID=MI0014202\_1;accession\_number=MI0014202;Name=hsa-mir-3171  
Total reads = 0



**D) PPB Case 14 cell line miRNA sequencing**  
ID=MI0014202\_1;accession\_number=MI0014202;Name=hsa-mir-3171  
Total reads = 0



**B) Normal fibroblast miRNA sequencing**  
ID=MI0003638\_1;accession\_number=MI0003638;Name=hsa-mir-624  
Total reads = 0



**C) PPB Case 14 tumor miRNA sequencing**  
ID=MI0003638\_1;accession\_number=MI0003638;Name=hsa-mir-624  
Total reads = 0



**D) PPB Case 14 cell line miRNA sequencing**  
ID=MI0003638\_1;accession\_number=MI0003638;Name=hsa-mir-624  
Total reads = 0



**B) Normal fibroblast miRNA sequencing**  
ID=MI0016866\_1;accession\_number=MI0016866;Name=hsa-mir-4503  
Total reads = 0



**C) PPB Case 14 tumor miRNA sequencing**  
ID=MI0016866\_1;accession\_number=MI0016866;Name=hsa-mir-4503  
Total reads = 0



**D) PPB Case 14 cell line miRNA sequencing**  
ID=MI0016866\_1;accession\_number=MI0016866;Name=hsa-mir-4503  
Total reads = 0



**B) Normal fibroblast miRNA sequencing**  
ID=MI0016595\_1;accession\_number=MI0016595;Name=hsa-mir-548y  
Total reads = 0



**C) PPB Case 14 tumor miRNA sequencing**  
ID=MI0016595\_1;accession\_number=MI0016595;Name=hsa-mir-548y  
Total reads = 0



**D) PPB Case 14 cell line miRNA sequencing**  
ID=MI0016595\_1;accession\_number=MI0016595;Name=hsa-mir-548y  
Total reads = 0



**B) Normal fibroblast miRNA sequencing**  
ID=MI0020353\_1;accession\_number=MI0020353;Name=hsa-mir-6076  
Total reads = 0



**C) PPB Case 14 tumor miRNA sequencing**  
ID=MI0020353\_1;accession\_number=MI0020353;Name=hsa-mir-6076  
Total reads = 0



**D) PPB Case 14 cell line miRNA sequencing**  
ID=MI0020353\_1;accession\_number=MI0020353;Name=hsa-mir-6076  
Total reads = 0



**B) Normal fibroblast miRNA sequencing**  
ID=MI0016867\_1;accession\_number=MI0016867;Name=hsa-mir-4504  
Total reads = 0



**C) PPB Case 14 tumor miRNA sequencing**  
ID=MI0016867\_1;accession\_number=MI0016867;Name=hsa-mir-4504  
Total reads = 0



**D) PPB Case 14 cell line miRNA sequencing**  
ID=MI0016867\_1;accession\_number=MI0016867;Name=hsa-mir-4504  
Total reads = 0



**B) Normal fibroblast miRNA sequencing**  
ID=MI0019135\_1;accession\_number=MI0019135;Name=hsa-mir-5580  
Total reads = 0



**C) PPB Case 14 tumor miRNA sequencing**  
ID=MI0019135\_1;accession\_number=MI0019135;Name=hsa-mir-5580  
Total reads = 0



**D) PPB Case 14 cell line miRNA sequencing**  
ID=MI0019135\_1;accession\_number=MI0019135;Name=hsa-mir-5580  
Total reads = 0



**B) Normal fibroblast miRNA sequencing**  
ID=MI0015839\_1;accession\_number=MI0015839;Name=hsa-mir-4308  
Total reads = 0



**C) PPB Case 14 tumor miRNA sequencing**  
ID=MI0015839\_1;accession\_number=MI0015839;Name=hsa-mir-4308  
Total reads = 0



**D) PPB Case 14 cell line miRNA sequencing**  
ID=MI0015839\_1;accession\_number=MI0015839;Name=hsa-mir-4308  
Total reads = 0





**B) Normal fibroblast miRNA sequencing**  
ID=MI0019143\_1;accession\_number=MI0019143;Name=hsa-mir-5586  
Total reads = 0



**C) PPB Case 14 tumor miRNA sequencing**  
ID=MI0019143\_1;accession\_number=MI0019143;Name=hsa-mir-5586  
Total reads = 0



**D) PPB Case 14 cell line miRNA sequencing**  
ID=MI0019143\_1;accession\_number=MI0019143;Name=hsa-mir-5586  
Total reads = 0



**B) Normal fibroblast miRNA sequencing**  
ID=MI0006411\_1;accession\_number=MI0006411;Name=hsa-mir-548h-1  
Total reads = 0



**C) PPB Case 14 tumor miRNA sequencing**  
ID=MI0006411\_1;accession\_number=MI0006411;Name=hsa-mir-548h-1  
Total reads = 0



**D) PPB Case 14 cell line miRNA sequencing**  
ID=MI0006411\_1;accession\_number=MI0006411;Name=hsa-mir-548h-1  
Total reads = 0



**B) Normal fibroblast miRNA sequencing**  
ID=MI0017339\_1;accession\_number=MI0017339;Name=hsa-mir-4706  
Total reads = 0



**C) PPB Case 14 tumor miRNA sequencing**  
ID=MI0017339\_1;accession\_number=MI0017339;Name=hsa-mir-4706  
Total reads = 0



**D) PPB Case 14 cell line miRNA sequencing**  
ID=MI0017339\_1;accession\_number=MI0017339;Name=hsa-mir-4706  
Total reads = 0



**B) Normal fibroblast miRNA sequencing**  
ID=MI0017341\_1;accession\_number=MI0017341;Name=hsa-mir-4708  
Total reads = 0



**C) PPB Case 14 tumor miRNA sequencing**  
ID=MI0017341\_1;accession\_number=MI0017341;Name=hsa-mir-4708  
Total reads = 0



**D) PPB Case 14 cell line miRNA sequencing**  
ID=MI0017341\_1;accession\_number=MI0017341;Name=hsa-mir-4708  
Total reads = 0



**B) Normal fibroblast miRNA sequencing**  
ID=MI0019301\_1;accession\_number=MI0019301;Name=hsa-mir-5694  
Total reads = 0



**C) PPB Case 14 tumor miRNA sequencing**  
ID=MI0019301\_1;accession\_number=MI0019301;Name=hsa-mir-5694  
Total reads = 0



**D) PPB Case 14 cell line miRNA sequencing**  
ID=MI0019301\_1;accession\_number=MI0019301;Name=hsa-mir-5694  
Total reads = 0



**B) Normal fibroblast miRNA sequencing**  
ID=MI0016868\_1;accession\_number=MI0016868;Name=hsa-mir-4505  
Total reads = 0



**C) PPB Case 14 tumor miRNA sequencing**  
ID=MI0016868\_1;accession\_number=MI0016868;Name=hsa-mir-4505  
Total reads = 0



**D) PPB Case 14 cell line miRNA sequencing**  
ID=MI0016868\_1;accession\_number=MI0016868;Name=hsa-mir-4505  
Total reads = 0



**B) Normal fibroblast miRNA sequencing**  
ID=MI0017342\_1;accession\_number=MI0017342;Name=hsa-mir-4709  
Total reads = 0



**C) PPB Case 14 tumor miRNA sequencing**  
ID=MI0017342\_1;accession\_number=MI0017342;Name=hsa-mir-4709  
Total reads = 0



**D) PPB Case 14 cell line miRNA sequencing**  
ID=MI0017342\_1;accession\_number=MI0017342;Name=hsa-mir-4709  
Total reads = 0



**B) Normal fibroblast miRNA sequencing**  
ID=MI0006394\_1;accession\_number=MI0006394;Name=hsa-mir-1260a  
Total reads = 0



**C) PPB Case 14 tumor miRNA sequencing**  
ID=MI0006394\_1;accession\_number=MI0006394;Name=hsa-mir-1260a  
Total reads = 0



**D) PPB Case 14 cell line miRNA sequencing**  
ID=MI0006394\_1;accession\_number=MI0006394;Name=hsa-mir-1260a  
Total reads = 0





**B) Normal fibroblast miRNA sequencing**  
ID=MI0016869\_1;accession\_number=MI0016869;Name=hsa-mir-4506  
Total reads = 0



**C) PPB Case 14 tumor miRNA sequencing**  
ID=MI0016869\_1;accession\_number=MI0016869;Name=hsa-mir-4506  
Total reads = 0



**D) PPB Case 14 cell line miRNA sequencing**  
ID=MI0016869\_1;accession\_number=MI0016869;Name=hsa-mir-4506  
Total reads = 0



**B) Normal fibroblast miRNA sequencing**  
ID=MI0014204\_1;accession\_number=MI0014204;Name=hsa-mir-3173  
Total reads = 0



**C) PPB Case 14 tumor miRNA sequencing**  
ID=MI0014204\_1;accession\_number=MI0014204;Name=hsa-mir-3173  
Total reads = 0



**D) PPB Case 14 cell line miRNA sequencing**  
ID=MI0014204\_1;accession\_number=MI0014204;Name=hsa-mir-3173  
Total reads = 0



**B) Normal fibroblast miRNA sequencing**  
ID=MI0003772\_1;accession\_number=MI0003772;Name=hsa-mir-151b  
Total reads = 0



**C) PPB Case 14 tumor miRNA sequencing**  
ID=MI0003772\_1;accession\_number=MI0003772;Name=hsa-mir-151b  
Total reads = 0



**D) PPB Case 14 cell line miRNA sequencing**  
ID=MI0003772\_1;accession\_number=MI0003772;Name=hsa-mir-151b  
Total reads = 0



**B) Normal fibroblast miRNA sequencing**  
ID=MI0016870\_1;accession\_number=MI0016870;Name=hsa-mir-2392  
Total reads = 0



**C) PPB Case 14 tumor miRNA sequencing**  
ID=MI0016870\_1;accession\_number=MI0016870;Name=hsa-mir-2392  
Total reads = 0



**D) PPB Case 14 cell line miRNA sequencing**  
ID=MI0016870\_1;accession\_number=MI0016870;Name=hsa-mir-2392  
Total reads = 1



**B) Normal fibroblast miRNA sequencing**  
ID=MI0001726\_1;accession\_number=MI0001726;Name=hsa-mir-329-2  
Total reads = 0



**C) PPB Case 14 tumor miRNA sequencing**  
ID=MI0001726\_1;accession\_number=MI0001726;Name=hsa-mir-329-2  
Total reads = 3

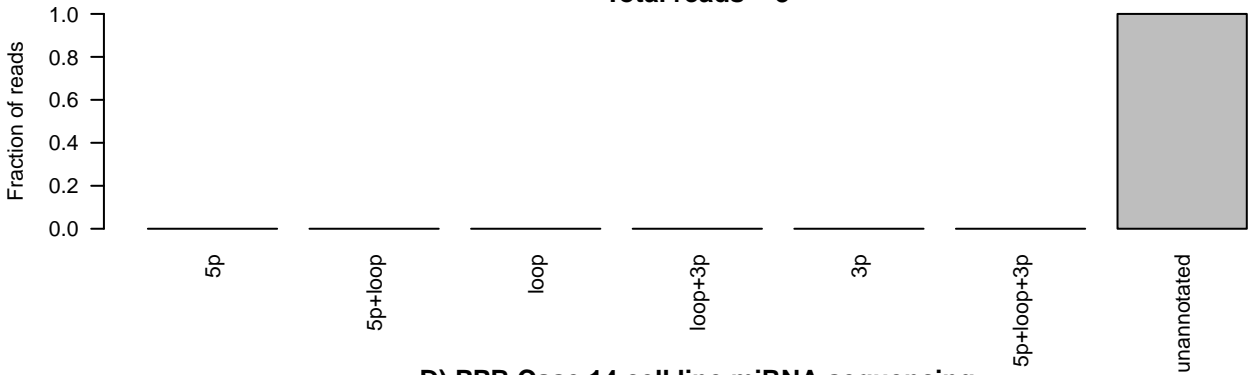

**D) PPB Case 14 cell line miRNA sequencing**  
ID=MI0001726\_1;accession\_number=MI0001726;Name=hsa-mir-329-2  
Total reads = 0



**B) Normal fibroblast miRNA sequencing**  
ID=MI0003134\_1;accession\_number=MI0003134;Name=hsa-mir-494  
Total reads = 0



**C) PPB Case 14 tumor miRNA sequencing**  
ID=MI0003134\_1;accession\_number=MI0003134;Name=hsa-mir-494  
Total reads = 1



**D) PPB Case 14 cell line miRNA sequencing**  
ID=MI0003134\_1;accession\_number=MI0003134;Name=hsa-mir-494  
Total reads = 0



**B) Normal fibroblast miRNA sequencing**  
ID=MI0014205\_1;accession\_number=MI0014205;Name=hsa-mir-1193  
Total reads = 0



**C) PPB Case 14 tumor miRNA sequencing**  
ID=MI0014205\_1;accession\_number=MI0014205;Name=hsa-mir-1193  
Total reads = 0



**D) PPB Case 14 cell line miRNA sequencing**  
ID=MI0014205\_1;accession\_number=MI0014205;Name=hsa-mir-1193  
Total reads = 0



**B) Normal fibroblast miRNA sequencing**  
ID=MI0005525\_1;accession\_number=MI0005525;Name=hsa-mir-300  
Total reads = 0



**C) PPB Case 14 tumor miRNA sequencing**  
ID=MI0005525\_1;accession\_number=MI0005525;Name=hsa-mir-300  
Total reads = 0



**D) PPB Case 14 cell line miRNA sequencing**  
ID=MI0005525\_1;accession\_number=MI0005525;Name=hsa-mir-300  
Total reads = 0





**B) Normal fibroblast miRNA sequencing**  
ID=MI0003844\_1;accession\_number=MI0003844;Name=hsa-mir-1185-1  
Total reads = 0



**C) PPB Case 14 tumor miRNA sequencing**  
ID=MI0003844\_1;accession\_number=MI0003844;Name=hsa-mir-1185-1  
Total reads = 22

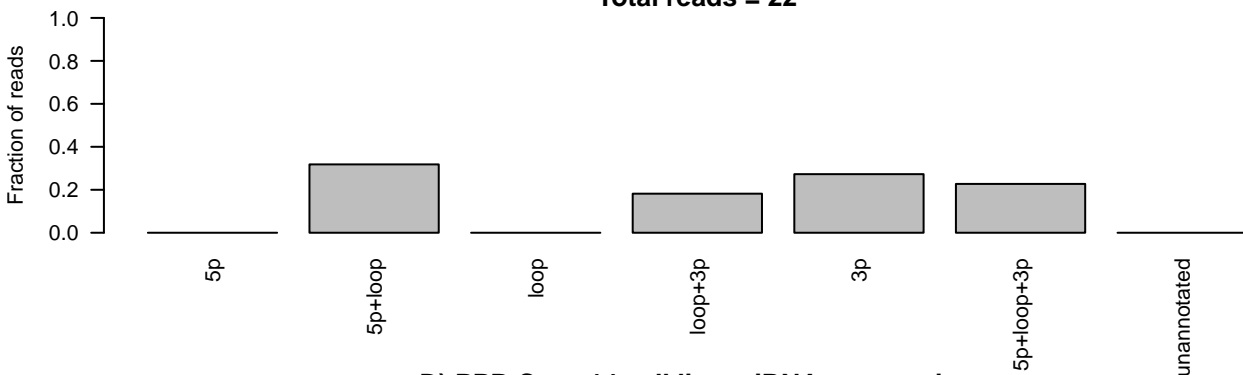

**D) PPB Case 14 cell line miRNA sequencing**  
ID=MI0003844\_1;accession\_number=MI0003844;Name=hsa-mir-1185-1  
Total reads = 3

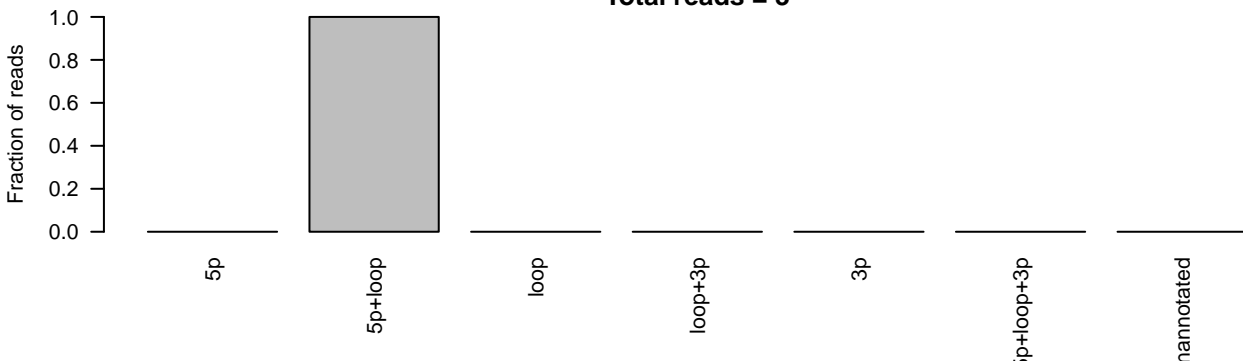

**B) Normal fibroblast miRNA sequencing**  
ID=MI0003821\_1;accession\_number=MI0003821;Name=hsa-mir-1185-2  
Total reads = 0



**C) PPB Case 14 tumor miRNA sequencing**  
ID=MI0003821\_1;accession\_number=MI0003821;Name=hsa-mir-1185-2  
Total reads = 1



**D) PPB Case 14 cell line miRNA sequencing**  
ID=MI0003821\_1;accession\_number=MI0003821;Name=hsa-mir-1185-2  
Total reads = 0



**B) Normal fibroblast miRNA sequencing**  
ID=MI0003514\_1;accession\_number=MI0003514;Name=hsa-mir-539  
Total reads = 0



**C) PPB Case 14 tumor miRNA sequencing**  
ID=MI0003514\_1;accession\_number=MI0003514;Name=hsa-mir-539  
Total reads = 2

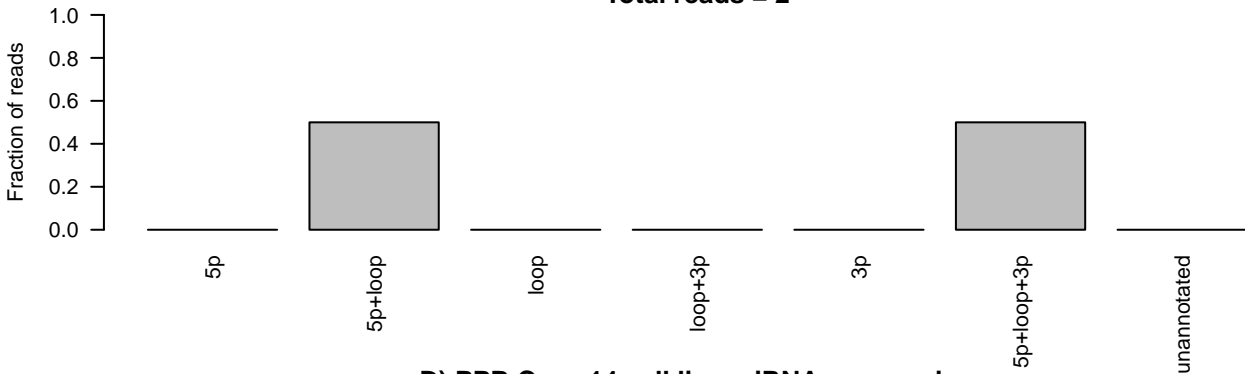

**D) PPB Case 14 cell line miRNA sequencing**  
ID=MI0003514\_1;accession\_number=MI0003514;Name=hsa-mir-539  
Total reads = 0



**B) Normal fibroblast miRNA sequencing**  
ID=MI0005540\_1;accession\_number=MI0005540;Name=hsa-mir-889  
Total reads = 0



**C) PPB Case 14 tumor miRNA sequencing**  
ID=MI0005540\_1;accession\_number=MI0005540;Name=hsa-mir-889  
Total reads = 0



**D) PPB Case 14 cell line miRNA sequencing**  
ID=MI0005540\_1;accession\_number=MI0005540;Name=hsa-mir-889  
Total reads = 0



**B) Normal fibroblast miRNA sequencing**  
ID=MI0003515\_1;accession\_number=MI0003515;Name=hsa-mir-544a  
Total reads = 0



**C) PPB Case 14 tumor miRNA sequencing**  
ID=MI0003515\_1;accession\_number=MI0003515;Name=hsa-mir-544a  
Total reads = 1



**D) PPB Case 14 cell line miRNA sequencing**  
ID=MI0003515\_1;accession\_number=MI0003515;Name=hsa-mir-544a  
Total reads = 0



**B) Normal fibroblast miRNA sequencing**  
ID=MI0003677\_1;accession\_number=MI0003677;Name=hsa-mir-655  
Total reads = 0



**C) PPB Case 14 tumor miRNA sequencing**  
ID=MI0003677\_1;accession\_number=MI0003677;Name=hsa-mir-655  
Total reads = 1

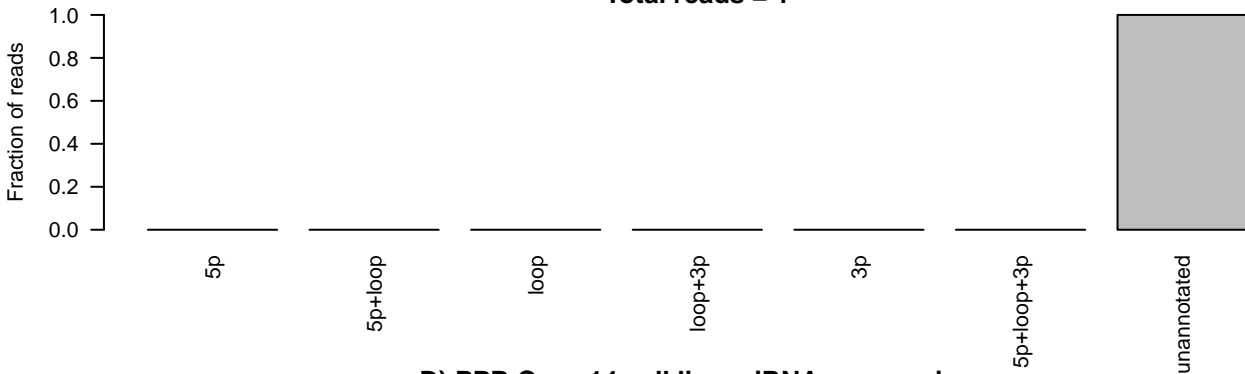

**D) PPB Case 14 cell line miRNA sequencing**  
ID=MI0003677\_1;accession\_number=MI0003677;Name=hsa-mir-655  
Total reads = 0



**B) Normal fibroblast miRNA sequencing**  
ID=MI0003761\_1;accession\_number=MI0003761;Name=hsa-mir-668  
Total reads = 0



**C) PPB Case 14 tumor miRNA sequencing**  
ID=MI0003761\_1;accession\_number=MI0003761;Name=hsa-mir-668  
Total reads = 0



**D) PPB Case 14 cell line miRNA sequencing**  
ID=MI0003761\_1;accession\_number=MI0003761;Name=hsa-mir-668  
Total reads = 0



**B) Normal fibroblast miRNA sequencing**  
ID=MI0014206\_1;accession\_number=MI0014206;Name=hsa-mir-323b  
Total reads = 0



**C) PPB Case 14 tumor miRNA sequencing**  
ID=MI0014206\_1;accession\_number=MI0014206;Name=hsa-mir-323b  
Total reads = 2

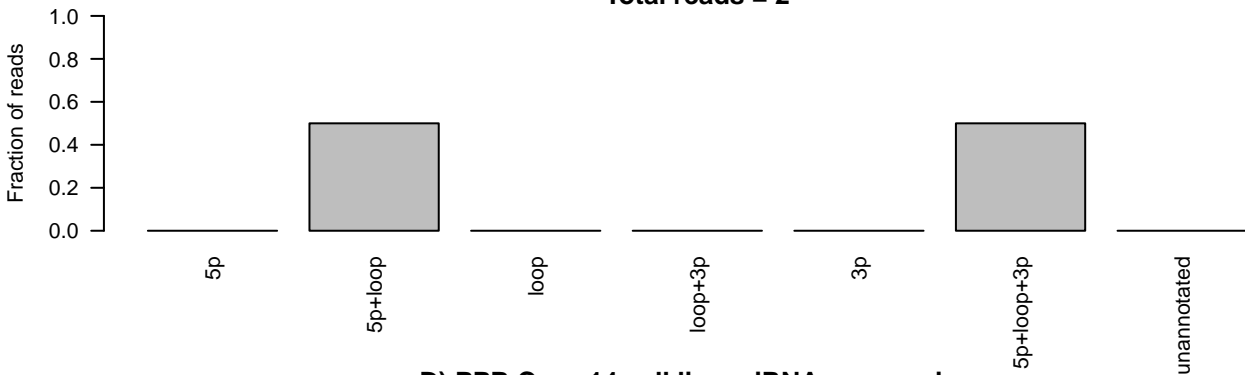

**D) PPB Case 14 cell line miRNA sequencing**  
ID=MI0014206\_1;accession\_number=MI0014206;Name=hsa-mir-323b  
Total reads = 0





**B) Normal fibroblast miRNA sequencing**  
ID=MI0003136\_1;accession\_number=MI0003136;Name=hsa-mir-496  
Total reads = 0



**C) PPB Case 14 tumor miRNA sequencing**  
ID=MI0003136\_1;accession\_number=MI0003136;Name=hsa-mir-496  
Total reads = 0



**D) PPB Case 14 cell line miRNA sequencing**  
ID=MI0003136\_1;accession\_number=MI0003136;Name=hsa-mir-496  
Total reads = 0



**B) Normal fibroblast miRNA sequencing**  
ID=MI0000785\_1;accession\_number=MI0000785;Name=hsa-mir-377  
Total reads = 0



**C) PPB Case 14 tumor miRNA sequencing**  
ID=MI0000785\_1;accession\_number=MI0000785;Name=hsa-mir-377  
Total reads = 4

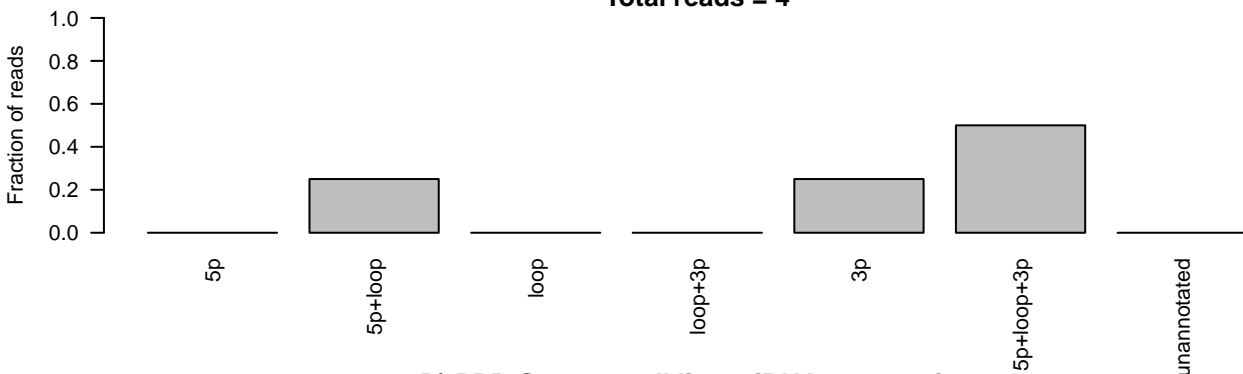

**D) PPB Case 14 cell line miRNA sequencing**  
ID=MI0000785\_1;accession\_number=MI0000785;Name=hsa-mir-377  
Total reads = 0



**B) Normal fibroblast miRNA sequencing**  
ID=MI0003678\_1;accession\_number=MI0003678;Name=hsa-mir-656  
Total reads = 0



**C) PPB Case 14 tumor miRNA sequencing**  
ID=MI0003678\_1;accession\_number=MI0003678;Name=hsa-mir-656  
Total reads = 0



**D) PPB Case 14 cell line miRNA sequencing**  
ID=MI0003678\_1;accession\_number=MI0003678;Name=hsa-mir-656  
Total reads = 0



**B) Normal fibroblast miRNA sequencing**  
ID=MI0006382\_1;accession\_number=MI0006382;Name=hsa-mir-1247  
Total reads = 0



**C) PPB Case 14 tumor miRNA sequencing**  
ID=MI0006382\_1;accession\_number=MI0006382;Name=hsa-mir-1247  
Total reads = 9

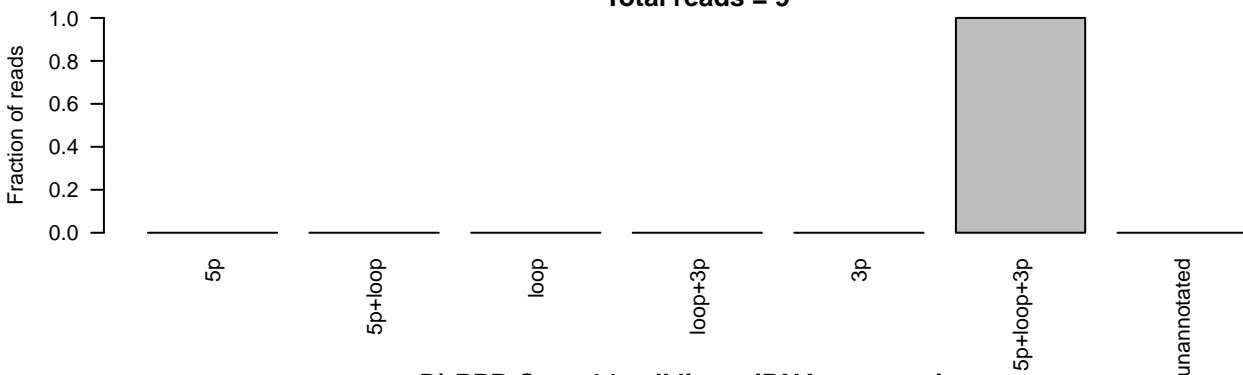

**D) PPB Case 14 cell line miRNA sequencing**  
ID=MI0006382\_1;accession\_number=MI0006382;Name=hsa-mir-1247  
Total reads = 0



**B) Normal fibroblast miRNA sequencing**  
ID=MI0015837\_1;accession\_number=MI0015837;Name=hsa-mir-4309  
Total reads = 0



**C) PPB Case 14 tumor miRNA sequencing**  
ID=MI0015837\_1;accession\_number=MI0015837;Name=hsa-mir-4309  
Total reads = 0



**D) PPB Case 14 cell line miRNA sequencing**  
ID=MI0015837\_1;accession\_number=MI0015837;Name=hsa-mir-4309  
Total reads = 0



**B) Normal fibroblast miRNA sequencing**  
ID=MI0000283\_1;accession\_number=MI0000283;Name=hsa-mir-203a  
Total reads = 0



**C) PPB Case 14 tumor miRNA sequencing**  
ID=MI0000283\_1;accession\_number=MI0000283;Name=hsa-mir-203a  
Total reads = 0



**D) PPB Case 14 cell line miRNA sequencing**  
ID=MI0000283\_1;accession\_number=MI0000283;Name=hsa-mir-203a  
Total reads = 0



**B) Normal fibroblast miRNA sequencing**  
ID=MI0017343\_1;accession\_number=MI0017343;Name=hsa-mir-203b  
Total reads = 0



**C) PPB Case 14 tumor miRNA sequencing**  
ID=MI0017343\_1;accession\_number=MI0017343;Name=hsa-mir-203b  
Total reads = 0



**D) PPB Case 14 cell line miRNA sequencing**  
ID=MI0017343\_1;accession\_number=MI0017343;Name=hsa-mir-203b  
Total reads = 0



**B) Normal fibroblast miRNA sequencing**  
ID=MI0017344\_1;accession\_number=MI0017344;Name=hsa-mir-4710  
Total reads = 0



**C) PPB Case 14 tumor miRNA sequencing**  
ID=MI0017344\_1;accession\_number=MI0017344;Name=hsa-mir-4710  
Total reads = 0



**D) PPB Case 14 cell line miRNA sequencing**  
ID=MI0017344\_1;accession\_number=MI0017344;Name=hsa-mir-4710  
Total reads = 0





**B) Normal fibroblast miRNA sequencing**  
ID=MI0016910\_1;accession\_number=MI0016910;Name=hsa-mir-4539  
Total reads = 0



**C) PPB Case 14 tumor miRNA sequencing**  
ID=MI0016910\_1;accession\_number=MI0016910;Name=hsa-mir-4539  
Total reads = 0



**D) PPB Case 14 cell line miRNA sequencing**  
ID=MI0016910\_1;accession\_number=MI0016910;Name=hsa-mir-4539  
Total reads = 0



**B) Normal fibroblast miRNA sequencing**  
ID=MI0016871\_1;accession\_number=MI0016871;Name=hsa-mir-4507  
Total reads = 0



**C) PPB Case 14 tumor miRNA sequencing**  
ID=MI0016871\_1;accession\_number=MI0016871;Name=hsa-mir-4507  
Total reads = 0



**D) PPB Case 14 cell line miRNA sequencing**  
ID=MI0016871\_1;accession\_number=MI0016871;Name=hsa-mir-4507  
Total reads = 0



**B) Normal fibroblast miRNA sequencing**  
ID=MI0016908\_1;accession\_number=MI0016908;Name=hsa-mir-4537  
Total reads = 0



**C) PPB Case 14 tumor miRNA sequencing**  
ID=MI0016908\_1;accession\_number=MI0016908;Name=hsa-mir-4537  
Total reads = 0



**D) PPB Case 14 cell line miRNA sequencing**  
ID=MI0016908\_1;accession\_number=MI0016908;Name=hsa-mir-4537  
Total reads = 0



**B) Normal fibroblast miRNA sequencing**  
ID=MI0018174\_1;accession\_number=MI0018174;Name=hsa-mir-5195  
Total reads = 0



**C) PPB Case 14 tumor miRNA sequencing**  
ID=MI0018174\_1;accession\_number=MI0018174;Name=hsa-mir-5195  
Total reads = 0



**D) PPB Case 14 cell line miRNA sequencing**  
ID=MI0018174\_1;accession\_number=MI0018174;Name=hsa-mir-5195  
Total reads = 0



**B) Normal fibroblast miRNA sequencing**  
ID=MI0014207\_1;accession\_number=MI0014207;Name=hsa-mir-3118-4  
Total reads = 0



**C) PPB Case 14 tumor miRNA sequencing**  
ID=MI0014207\_1;accession\_number=MI0014207;Name=hsa-mir-3118-4  
Total reads = 0



**D) PPB Case 14 cell line miRNA sequencing**  
ID=MI0014207\_1;accession\_number=MI0014207;Name=hsa-mir-3118-4  
Total reads = 0



**B) Normal fibroblast miRNA sequencing**  
ID=MI0019308\_1;accession\_number=MI0019308;Name=hsa-mir-5701-1  
Total reads = 0



**C) PPB Case 14 tumor miRNA sequencing**  
ID=MI0019308\_1;accession\_number=MI0019308;Name=hsa-mir-5701-1  
Total reads = 0



**D) PPB Case 14 cell line miRNA sequencing**  
ID=MI0019308\_1;accession\_number=MI0019308;Name=hsa-mir-5701-1  
Total reads = 0



**B) Normal fibroblast miRNA sequencing**  
ID=MI0015981\_1;accession\_number=MI0015981;Name=hsa-mir-3118-6  
Total reads = 0



**C) PPB Case 14 tumor miRNA sequencing**  
ID=MI0015981\_1;accession\_number=MI0015981;Name=hsa-mir-3118-6  
Total reads = 0



**D) PPB Case 14 cell line miRNA sequencing**  
ID=MI0015981\_1;accession\_number=MI0015981;Name=hsa-mir-3118-6  
Total reads = 0



**B) Normal fibroblast miRNA sequencing**  
ID=MI0019593\_1;accession\_number=MI0019593;Name=hsa-mir-5701-2  
Total reads = 0



**C) PPB Case 14 tumor miRNA sequencing**  
ID=MI0019593\_1;accession\_number=MI0019593;Name=hsa-mir-5701-2  
Total reads = 0



**D) PPB Case 14 cell line miRNA sequencing**  
ID=MI0019593\_1;accession\_number=MI0019593;Name=hsa-mir-5701-2  
Total reads = 0





**B) Normal fibroblast miRNA sequencing**  
ID=MI0006405\_1;accession\_number=MI0006405;Name=hsa-mir-1268a  
Total reads = 0



**C) PPB Case 14 tumor miRNA sequencing**  
ID=MI0006405\_1;accession\_number=MI0006405;Name=hsa-mir-1268a  
Total reads = 0



**D) PPB Case 14 cell line miRNA sequencing**  
ID=MI0006405\_1;accession\_number=MI0006405;Name=hsa-mir-1268a  
Total reads = 0



**B) Normal fibroblast miRNA sequencing**  
ID=MI0016873\_1;accession\_number=MI0016873;Name=hsa-mir-4509-1  
Total reads = 0

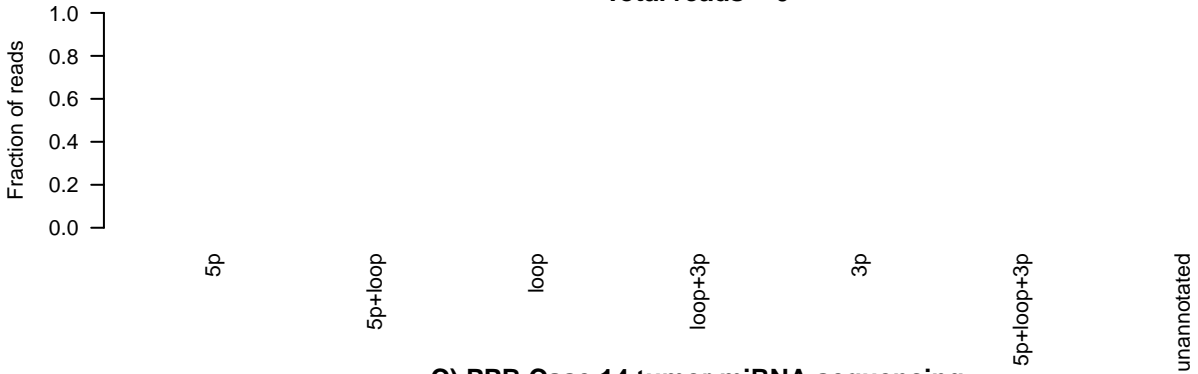

**C) PPB Case 14 tumor miRNA sequencing**  
ID=MI0016873\_1;accession\_number=MI0016873;Name=hsa-mir-4509-1  
Total reads = 0

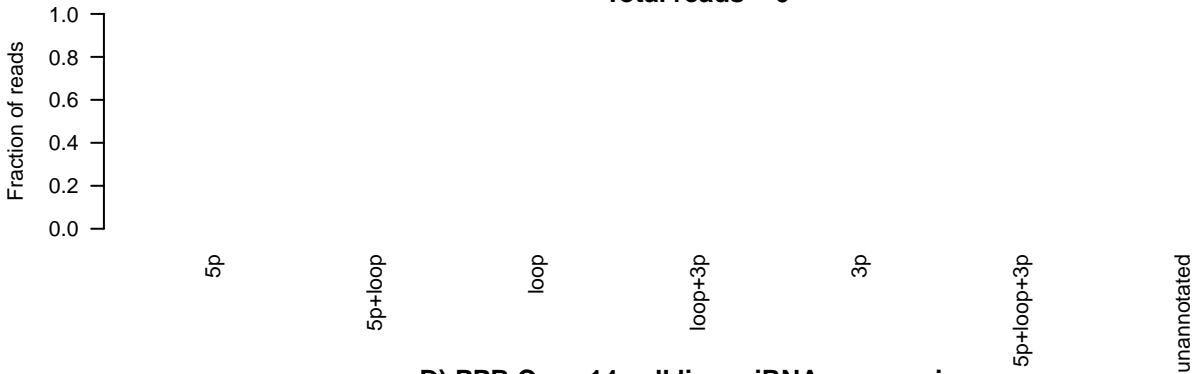

**D) PPB Case 14 cell line miRNA sequencing**  
ID=MI0016873\_1;accession\_number=MI0016873;Name=hsa-mir-4509-1  
Total reads = 0



**B) Normal fibroblast miRNA sequencing**  
ID=MI0016872\_1;accession\_number=MI0016872;Name=hsa-mir-4508  
Total reads = 0



**C) PPB Case 14 tumor miRNA sequencing**  
ID=MI0016872\_1;accession\_number=MI0016872;Name=hsa-mir-4508  
Total reads = 0



**D) PPB Case 14 cell line miRNA sequencing**  
ID=MI0016872\_1;accession\_number=MI0016872;Name=hsa-mir-4508  
Total reads = 0



**B) Normal fibroblast miRNA sequencing**  
ID=MI0017349\_1;accession\_number=MI0017349;Name=hsa-mir-4715  
Total reads = 0



**C) PPB Case 14 tumor miRNA sequencing**  
ID=MI0017349\_1;accession\_number=MI0017349;Name=hsa-mir-4715  
Total reads = 0



**D) PPB Case 14 cell line miRNA sequencing**  
ID=MI0017349\_1;accession\_number=MI0017349;Name=hsa-mir-4715  
Total reads = 0



**B) Normal fibroblast miRNA sequencing**  
ID=MI0016874\_1;accession\_number=MI0016874;Name=hsa-mir-4509-2  
Total reads = 0



**C) PPB Case 14 tumor miRNA sequencing**  
ID=MI0016874\_1;accession\_number=MI0016874;Name=hsa-mir-4509-2  
Total reads = 0



**D) PPB Case 14 cell line miRNA sequencing**  
ID=MI0016874\_1;accession\_number=MI0016874;Name=hsa-mir-4509-2  
Total reads = 0



**B) Normal fibroblast miRNA sequencing**  
ID=MI0016875\_1;accession\_number=MI0016875;Name=hsa-mir-4509-3  
Total reads = 0



**C) PPB Case 14 tumor miRNA sequencing**  
ID=MI0016875\_1;accession\_number=MI0016875;Name=hsa-mir-4509-3  
Total reads = 0



**D) PPB Case 14 cell line miRNA sequencing**  
ID=MI0016875\_1;accession\_number=MI0016875;Name=hsa-mir-4509-3  
Total reads = 0



**B) Normal fibroblast miRNA sequencing**  
ID=MI0000287\_1;accession\_number=MI0000287;Name=hsa-mir-211  
Total reads = 0



**C) PPB Case 14 tumor miRNA sequencing**  
ID=MI0000287\_1;accession\_number=MI0000287;Name=hsa-mir-211  
Total reads = 0



**D) PPB Case 14 cell line miRNA sequencing**  
ID=MI0000287\_1;accession\_number=MI0000287;Name=hsa-mir-211  
Total reads = 0



**B) Normal fibroblast miRNA sequencing**  
ID=MI0006323\_1;accession\_number=MI0006323;Name=hsa-mir-1233-1  
Total reads = 0



**C) PPB Case 14 tumor miRNA sequencing**  
ID=MI0006323\_1;accession\_number=MI0006323;Name=hsa-mir-1233-1  
Total reads = 0



**D) PPB Case 14 cell line miRNA sequencing**  
ID=MI0006323\_1;accession\_number=MI0006323;Name=hsa-mir-1233-1  
Total reads = 0





**B) Normal fibroblast miRNA sequencing**  
ID=MI0015973\_1;accession\_number=MI0015973;Name=hsa-mir-1233-2  
Total reads = 0



**C) PPB Case 14 tumor miRNA sequencing**  
ID=MI0015973\_1;accession\_number=MI0015973;Name=hsa-mir-1233-2  
Total reads = 0



**D) PPB Case 14 cell line miRNA sequencing**  
ID=MI0015973\_1;accession\_number=MI0015973;Name=hsa-mir-1233-2  
Total reads = 0



**B) Normal fibroblast miRNA sequencing**  
ID=MI0016599\_1;accession\_number=MI0016599;Name=hsa-mir-3942  
Total reads = 0



**C) PPB Case 14 tumor miRNA sequencing**  
ID=MI0016599\_1;accession\_number=MI0016599;Name=hsa-mir-3942  
Total reads = 0



**D) PPB Case 14 cell line miRNA sequencing**  
ID=MI0016599\_1;accession\_number=MI0016599;Name=hsa-mir-3942  
Total reads = 0



**B) Normal fibroblast miRNA sequencing**  
ID=MI0016876\_1;accession\_number=MI0016876;Name=hsa-mir-4510  
Total reads = 0



**C) PPB Case 14 tumor miRNA sequencing**  
ID=MI0016876\_1;accession\_number=MI0016876;Name=hsa-mir-4510  
Total reads = 0



**D) PPB Case 14 cell line miRNA sequencing**  
ID=MI0016876\_1;accession\_number=MI0016876;Name=hsa-mir-4510  
Total reads = 0



**B) Normal fibroblast miRNA sequencing**  
ID=MI0003640\_1;accession\_number=MI0003640;Name=hsa-mir-626  
Total reads = 0



**C) PPB Case 14 tumor miRNA sequencing**  
ID=MI0003640\_1;accession\_number=MI0003640;Name=hsa-mir-626  
Total reads = 0



**D) PPB Case 14 cell line miRNA sequencing**  
ID=MI0003640\_1;accession\_number=MI0003640;Name=hsa-mir-626  
Total reads = 0



**B) Normal fibroblast miRNA sequencing**  
ID=MI0015840\_1;accession\_number=MI0015840;Name=hsa-mir-4310  
Total reads = 0



**C) PPB Case 14 tumor miRNA sequencing**  
ID=MI0015840\_1;accession\_number=MI0015840;Name=hsa-mir-4310  
Total reads = 0



**D) PPB Case 14 cell line miRNA sequencing**  
ID=MI0015840\_1;accession\_number=MI0015840;Name=hsa-mir-4310  
Total reads = 0



**B) Normal fibroblast miRNA sequencing**  
ID=MI0003641\_1;accession\_number=MI0003641;Name=hsa-mir-627  
Total reads = 0



**C) PPB Case 14 tumor miRNA sequencing**  
ID=MI0003641\_1;accession\_number=MI0003641;Name=hsa-mir-627  
Total reads = 0



**D) PPB Case 14 cell line miRNA sequencing**  
ID=MI0003641\_1;accession\_number=MI0003641;Name=hsa-mir-627  
Total reads = 0



**B) Normal fibroblast miRNA sequencing**  
ID=MI0006429\_1;accession\_number=MI0006429;Name=hsa-mir-1282  
Total reads = 0



**C) PPB Case 14 tumor miRNA sequencing**  
ID=MI0006429\_1;accession\_number=MI0006429;Name=hsa-mir-1282  
Total reads = 0



**D) PPB Case 14 cell line miRNA sequencing**  
ID=MI0006429\_1;accession\_number=MI0006429;Name=hsa-mir-1282  
Total reads = 0



**B) Normal fibroblast miRNA sequencing**  
ID=MI0005544\_1;accession\_number=MI0005544;Name=hsa-mir-147b  
Total reads = 0



**C) PPB Case 14 tumor miRNA sequencing**  
ID=MI0005544\_1;accession\_number=MI0005544;Name=hsa-mir-147b  
Total reads = 1

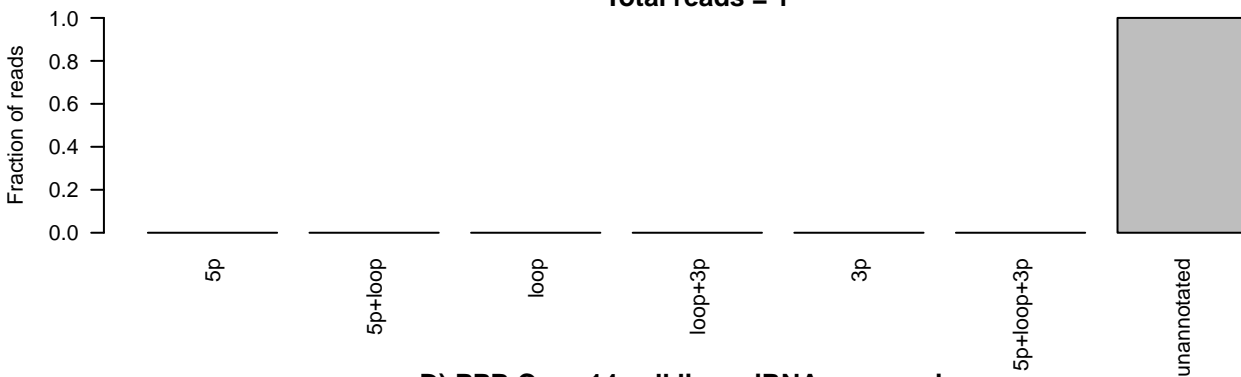

**D) PPB Case 14 cell line miRNA sequencing**  
ID=MI0005544\_1;accession\_number=MI0005544;Name=hsa-mir-147b  
Total reads = 0





**B) Normal fibroblast miRNA sequencing**  
ID=MI0017350\_1;accession\_number=MI0017350;Name=hsa-mir-4716  
Total reads = 0



**C) PPB Case 14 tumor miRNA sequencing**  
ID=MI0017350\_1;accession\_number=MI0017350;Name=hsa-mir-4716  
Total reads = 0



**D) PPB Case 14 cell line miRNA sequencing**  
ID=MI0017350\_1;accession\_number=MI0017350;Name=hsa-mir-4716  
Total reads = 0



**B) Normal fibroblast miRNA sequencing**  
ID=MI0017346\_1;accession\_number=MI0017346;Name=hsa-mir-4712  
Total reads = 0



**C) PPB Case 14 tumor miRNA sequencing**  
ID=MI0017346\_1;accession\_number=MI0017346;Name=hsa-mir-4712  
Total reads = 0



**D) PPB Case 14 cell line miRNA sequencing**  
ID=MI0017346\_1;accession\_number=MI0017346;Name=hsa-mir-4712  
Total reads = 0



**B) Normal fibroblast miRNA sequencing**  
ID=MI0017347\_1;accession\_number=MI0017347;Name=hsa-mir-4713  
Total reads = 0



**C) PPB Case 14 tumor miRNA sequencing**  
ID=MI0017347\_1;accession\_number=MI0017347;Name=hsa-mir-4713  
Total reads = 0



**D) PPB Case 14 cell line miRNA sequencing**  
ID=MI0017347\_1;accession\_number=MI0017347;Name=hsa-mir-4713  
Total reads = 0



**B) Normal fibroblast miRNA sequencing**  
ID=MI0006403\_1;accession\_number=MI0006403;Name=hsa-mir-1266  
Total reads = 0



**C) PPB Case 14 tumor miRNA sequencing**  
ID=MI0006403\_1;accession\_number=MI0006403;Name=hsa-mir-1266  
Total reads = 0



**D) PPB Case 14 cell line miRNA sequencing**  
ID=MI0006403\_1;accession\_number=MI0006403;Name=hsa-mir-1266  
Total reads = 0



**B) Normal fibroblast miRNA sequencing**  
ID=MI0003642\_1;accession\_number=MI0003642;Name=hsa-mir-628  
Total reads = 0



**C) PPB Case 14 tumor miRNA sequencing**  
ID=MI0003642\_1;accession\_number=MI0003642;Name=hsa-mir-628  
Total reads = 0



**D) PPB Case 14 cell line miRNA sequencing**  
ID=MI0003642\_1;accession\_number=MI0003642;Name=hsa-mir-628  
Total reads = 6

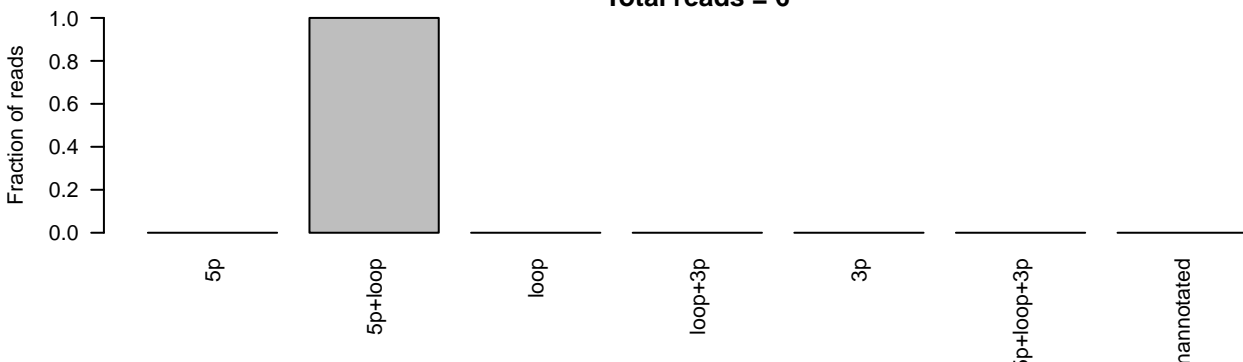

**B) Normal fibroblast miRNA sequencing**  
ID=MI0010635\_1;accession\_number=MI0010635;Name=hsa-mir-2116  
Total reads = 0



**C) PPB Case 14 tumor miRNA sequencing**  
ID=MI0010635\_1;accession\_number=MI0010635;Name=hsa-mir-2116  
Total reads = 0



**D) PPB Case 14 cell line miRNA sequencing**  
ID=MI0010635\_1;accession\_number=MI0010635;Name=hsa-mir-2116  
Total reads = 0



**B) Normal fibroblast miRNA sequencing**  
ID=MI0020362\_1;accession\_number=MI0020362;Name=hsa-mir-6085  
Total reads = 0



**C) PPB Case 14 tumor miRNA sequencing**  
ID=MI0020362\_1;accession\_number=MI0020362;Name=hsa-mir-6085  
Total reads = 0



**D) PPB Case 14 cell line miRNA sequencing**  
ID=MI0020362\_1;accession\_number=MI0020362;Name=hsa-mir-6085  
Total reads = 0



**B) Normal fibroblast miRNA sequencing**  
ID=MI0001444\_1;accession\_number=MI0001444;Name=hsa-mir-422a  
Total reads = 0



**C) PPB Case 14 tumor miRNA sequencing**  
ID=MI0001444\_1;accession\_number=MI0001444;Name=hsa-mir-422a  
Total reads = 0



**D) PPB Case 14 cell line miRNA sequencing**  
ID=MI0001444\_1;accession\_number=MI0001444;Name=hsa-mir-422a  
Total reads = 0





**B) Normal fibroblast miRNA sequencing**  
ID=MI0006408\_1;accession\_number=MI0006408;Name=hsa-mir-1272  
Total reads = 0



**C) PPB Case 14 tumor miRNA sequencing**  
ID=MI0006408\_1;accession\_number=MI0006408;Name=hsa-mir-1272  
Total reads = 0



**D) PPB Case 14 cell line miRNA sequencing**  
ID=MI0006408\_1;accession\_number=MI0006408;Name=hsa-mir-1272  
Total reads = 0



**B) Normal fibroblast miRNA sequencing**  
ID=MI0016877\_1;accession\_number=MI0016877;Name=hsa-mir-4511  
Total reads = 0



**C) PPB Case 14 tumor miRNA sequencing**  
ID=MI0016877\_1;accession\_number=MI0016877;Name=hsa-mir-4511  
Total reads = 0



**D) PPB Case 14 cell line miRNA sequencing**  
ID=MI0016877\_1;accession\_number=MI0016877;Name=hsa-mir-4511  
Total reads = 0



**B) Normal fibroblast miRNA sequencing**  
ID=MI0015841\_1;accession\_number=MI0015841;Name=hsa-mir-4311  
Total reads = 0



**C) PPB Case 14 tumor miRNA sequencing**  
ID=MI0015841\_1;accession\_number=MI0015841;Name=hsa-mir-4311  
Total reads = 0



**D) PPB Case 14 cell line miRNA sequencing**  
ID=MI0015841\_1;accession\_number=MI0015841;Name=hsa-mir-4311  
Total reads = 0



**B) Normal fibroblast miRNA sequencing**  
ID=MI0016878\_1;accession\_number=MI0016878;Name=hsa-mir-4512  
Total reads = 0



**C) PPB Case 14 tumor miRNA sequencing**  
ID=MI0016878\_1;accession\_number=MI0016878;Name=hsa-mir-4512  
Total reads = 0



**D) PPB Case 14 cell line miRNA sequencing**  
ID=MI0016878\_1;accession\_number=MI0016878;Name=hsa-mir-4512  
Total reads = 0



**B) Normal fibroblast miRNA sequencing**  
ID=MI0015842\_1;accession\_number=MI0015842;Name=hsa-mir-4312  
Total reads = 0



**C) PPB Case 14 tumor miRNA sequencing**  
ID=MI0015842\_1;accession\_number=MI0015842;Name=hsa-mir-4312  
Total reads = 0



**D) PPB Case 14 cell line miRNA sequencing**  
ID=MI0015842\_1;accession\_number=MI0015842;Name=hsa-mir-4312  
Total reads = 0



**B) Normal fibroblast miRNA sequencing**  
ID=MI0016879\_1;accession\_number=MI0016879;Name=hsa-mir-4513  
Total reads = 0



**C) PPB Case 14 tumor miRNA sequencing**  
ID=MI0016879\_1;accession\_number=MI0016879;Name=hsa-mir-4513  
Total reads = 0



**D) PPB Case 14 cell line miRNA sequencing**  
ID=MI0016879\_1;accession\_number=MI0016879;Name=hsa-mir-4513  
Total reads = 0



**B) Normal fibroblast miRNA sequencing**  
ID=MI0003645\_1;accession\_number=MI0003645;Name=hsa-mir-631  
Total reads = 0



**C) PPB Case 14 tumor miRNA sequencing**  
ID=MI0003645\_1;accession\_number=MI0003645;Name=hsa-mir-631  
Total reads = 0



**D) PPB Case 14 cell line miRNA sequencing**  
ID=MI0003645\_1;accession\_number=MI0003645;Name=hsa-mir-631  
Total reads = 0



**B) Normal fibroblast miRNA sequencing**  
ID=MI0015843\_1;accession\_number=MI0015843;Name=hsa-mir-4313  
Total reads = 0



**C) PPB Case 14 tumor miRNA sequencing**  
ID=MI0015843\_1;accession\_number=MI0015843;Name=hsa-mir-4313  
Total reads = 0



**D) PPB Case 14 cell line miRNA sequencing**  
ID=MI0015843\_1;accession\_number=MI0015843;Name=hsa-mir-4313  
Total reads = 0





**B) Normal fibroblast miRNA sequencing**  
ID=MI0016134\_1;accession\_number=MI0016134;Name=hsa-mir-3713  
Total reads = 0



**C) PPB Case 14 tumor miRNA sequencing**  
ID=MI0016134\_1;accession\_number=MI0016134;Name=hsa-mir-3713  
Total reads = 0



**D) PPB Case 14 cell line miRNA sequencing**  
ID=MI0016134\_1;accession\_number=MI0016134;Name=hsa-mir-3713  
Total reads = 0



**B) Normal fibroblast miRNA sequencing**  
ID=MI0000481\_1;accession\_number=MI0000481;Name=hsa-mir-184  
Total reads = 0



**C) PPB Case 14 tumor miRNA sequencing**  
ID=MI0000481\_1;accession\_number=MI0000481;Name=hsa-mir-184  
Total reads = 0



**D) PPB Case 14 cell line miRNA sequencing**  
ID=MI0000481\_1;accession\_number=MI0000481;Name=hsa-mir-184  
Total reads = 0



**B) Normal fibroblast miRNA sequencing**  
ID=MI0019117\_1;accession\_number=MI0019117;Name=hsa-mir-5572  
Total reads = 0



**C) PPB Case 14 tumor miRNA sequencing**  
ID=MI0019117\_1;accession\_number=MI0019117;Name=hsa-mir-5572  
Total reads = 0



**D) PPB Case 14 cell line miRNA sequencing**  
ID=MI0019117\_1;accession\_number=MI0019117;Name=hsa-mir-5572  
Total reads = 0



**B) Normal fibroblast miRNA sequencing**  
ID=MI0016880\_1;accession\_number=MI0016880;Name=hsa-mir-4514  
Total reads = 0



**C) PPB Case 14 tumor miRNA sequencing**  
ID=MI0016880\_1;accession\_number=MI0016880;Name=hsa-mir-4514  
Total reads = 0



**D) PPB Case 14 cell line miRNA sequencing**  
ID=MI0016880\_1;accession\_number=MI0016880;Name=hsa-mir-4514  
Total reads = 0



**B) Normal fibroblast miRNA sequencing**  
ID=MI0016881\_1;accession\_number=MI0016881;Name=hsa-mir-4515  
Total reads = 0



**C) PPB Case 14 tumor miRNA sequencing**  
ID=MI0016881\_1;accession\_number=MI0016881;Name=hsa-mir-4515  
Total reads = 0



**D) PPB Case 14 cell line miRNA sequencing**  
ID=MI0016881\_1;accession\_number=MI0016881;Name=hsa-mir-4515  
Total reads = 0



**B) Normal fibroblast miRNA sequencing**  
ID=MI0006416\_1;accession\_number=MI0006416;Name=hsa-mir-1276  
Total reads = 0



**C) PPB Case 14 tumor miRNA sequencing**  
ID=MI0006416\_1;accession\_number=MI0006416;Name=hsa-mir-1276  
Total reads = 0



**D) PPB Case 14 cell line miRNA sequencing**  
ID=MI0006416\_1;accession\_number=MI0006416;Name=hsa-mir-1276  
Total reads = 0



**B) Normal fibroblast miRNA sequencing**  
ID=MI0017875\_1;accession\_number=MI0017875;Name=hsa-mir-548ap  
Total reads = 0



**C) PPB Case 14 tumor miRNA sequencing**  
ID=MI0017875\_1;accession\_number=MI0017875;Name=hsa-mir-548ap  
Total reads = 0



**D) PPB Case 14 cell line miRNA sequencing**  
ID=MI0017875\_1;accession\_number=MI0017875;Name=hsa-mir-548ap  
Total reads = 0



**B) Normal fibroblast miRNA sequencing**  
ID=MI0006272\_1;accession\_number=MI0006272;Name=hsa-mir-1179  
Total reads = 0



**C) PPB Case 14 tumor miRNA sequencing**  
ID=MI0006272\_1;accession\_number=MI0006272;Name=hsa-mir-1179  
Total reads = 0



**D) PPB Case 14 cell line miRNA sequencing**  
ID=MI0006272\_1;accession\_number=MI0006272;Name=hsa-mir-1179  
Total reads = 0





**B) Normal fibroblast miRNA sequencing**  
ID=MI0000468\_1;accession\_number=MI0000468;Name=hsa-mir-9-3  
Total reads = 0



**C) PPB Case 14 tumor miRNA sequencing**  
ID=MI0000468\_1;accession\_number=MI0000468;Name=hsa-mir-9-3  
Total reads = 0



**D) PPB Case 14 cell line miRNA sequencing**  
ID=MI0000468\_1;accession\_number=MI0000468;Name=hsa-mir-9-3  
Total reads = 0



**B) Normal fibroblast miRNA sequencing**  
ID=MI0017983\_1;accession\_number=MI0017983;Name=hsa-mir-5094  
Total reads = 0



**C) PPB Case 14 tumor miRNA sequencing**  
ID=MI0017983\_1;accession\_number=MI0017983;Name=hsa-mir-5094  
Total reads = 0



**D) PPB Case 14 cell line miRNA sequencing**  
ID=MI0017983\_1;accession\_number=MI0017983;Name=hsa-mir-5094  
Total reads = 0



**B) Normal fibroblast miRNA sequencing**  
ID=MI0017877\_1;accession\_number=MI0017877;Name=hsa-mir-5009  
Total reads = 0



**C) PPB Case 14 tumor miRNA sequencing**  
ID=MI0017877\_1;accession\_number=MI0017877;Name=hsa-mir-5009  
Total reads = 0



**D) PPB Case 14 cell line miRNA sequencing**  
ID=MI0017877\_1;accession\_number=MI0017877;Name=hsa-mir-5009  
Total reads = 0



**B) Normal fibroblast miRNA sequencing**  
ID=MI0014208\_1;accession\_number=MI0014208;Name=hsa-mir-3174  
Total reads = 0



**C) PPB Case 14 tumor miRNA sequencing**  
ID=MI0014208\_1;accession\_number=MI0014208;Name=hsa-mir-3174  
Total reads = 0



**D) PPB Case 14 cell line miRNA sequencing**  
ID=MI0014208\_1;accession\_number=MI0014208;Name=hsa-mir-3174  
Total reads = 0



**B) Normal fibroblast miRNA sequencing**  
ID=MI0014209\_1;accession\_number=MI0014209;Name=hsa-mir-3175  
Total reads = 0

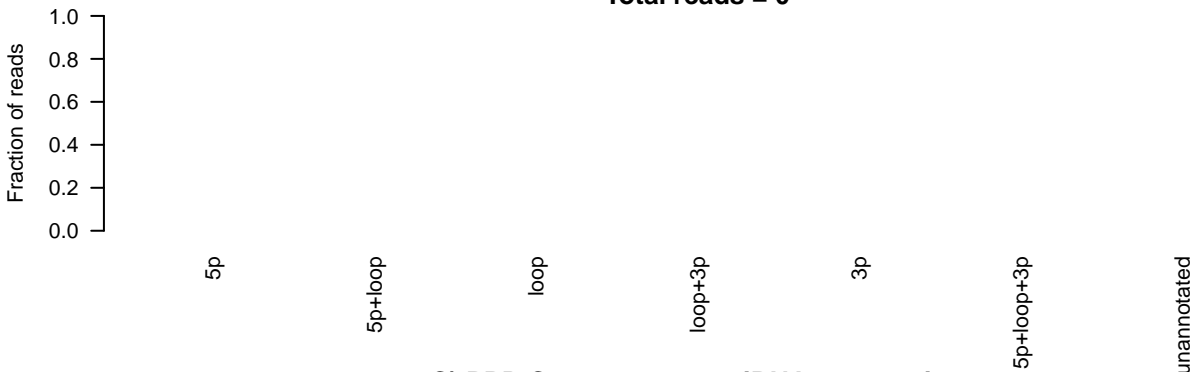

**C) PPB Case 14 tumor miRNA sequencing**  
ID=MI0014209\_1;accession\_number=MI0014209;Name=hsa-mir-3175  
Total reads = 0

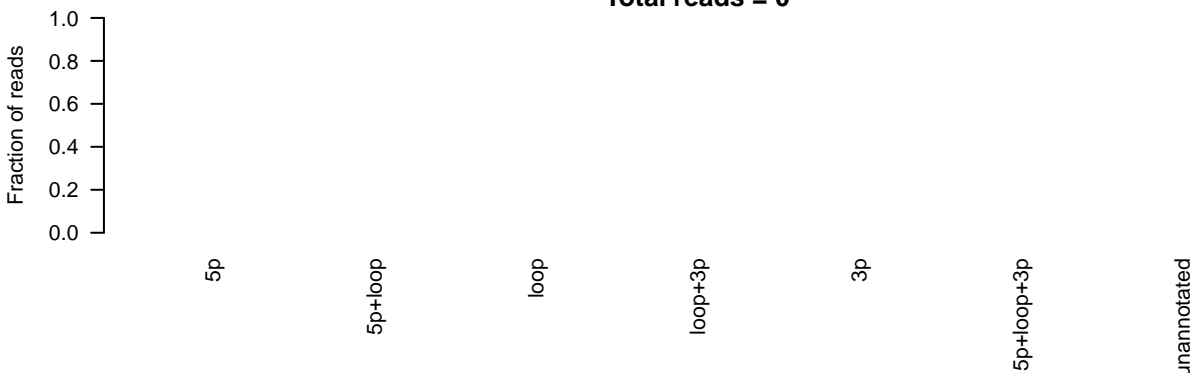

**D) PPB Case 14 cell line miRNA sequencing**  
ID=MI0014209\_1;accession\_number=MI0014209;Name=hsa-mir-3175  
Total reads = 0

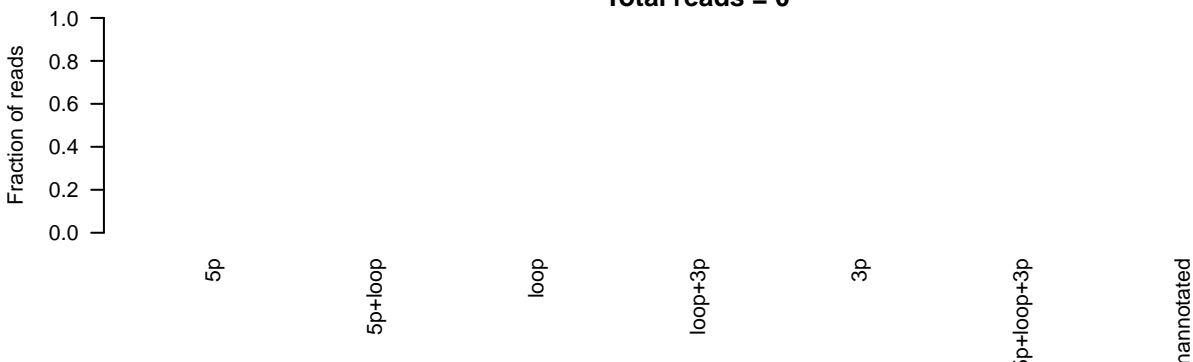

**B) Normal fibroblast miRNA sequencing**  
ID=MI0007074\_1;accession\_number=MI0007074;Name=hsa-mir-1469  
Total reads = 0



**C) PPB Case 14 tumor miRNA sequencing**  
ID=MI0007074\_1;accession\_number=MI0007074;Name=hsa-mir-1469  
Total reads = 0



**D) PPB Case 14 cell line miRNA sequencing**  
ID=MI0007074\_1;accession\_number=MI0007074;Name=hsa-mir-1469  
Total reads = 0



**B) Normal fibroblast miRNA sequencing**  
ID=MI0017348\_1;accession\_number=MI0017348;Name=hsa-mir-4714  
Total reads = 0



**C) PPB Case 14 tumor miRNA sequencing**  
ID=MI0017348\_1;accession\_number=MI0017348;Name=hsa-mir-4714  
Total reads = 0



**D) PPB Case 14 cell line miRNA sequencing**  
ID=MI0017348\_1;accession\_number=MI0017348;Name=hsa-mir-4714  
Total reads = 0



**B) Normal fibroblast miRNA sequencing**  
ID=MI0015978\_1;accession\_number=MI0015978;Name=hsa-mir-1302-9  
Total reads = 0



**C) PPB Case 14 tumor miRNA sequencing**  
ID=MI0015978\_1;accession\_number=MI0015978;Name=hsa-mir-1302-9  
Total reads = 0



**D) PPB Case 14 cell line miRNA sequencing**  
ID=MI0015978\_1;accession\_number=MI0015978;Name=hsa-mir-1302-9  
Total reads = 0





**B) Normal fibroblast miRNA sequencing**  
ID=MI0019144\_1;accession\_number=MI0019144;Name=hsa-mir-5587  
Total reads = 0



**C) PPB Case 14 tumor miRNA sequencing**  
ID=MI0019144\_1;accession\_number=MI0019144;Name=hsa-mir-5587  
Total reads = 0



**D) PPB Case 14 cell line miRNA sequencing**  
ID=MI0019144\_1;accession\_number=MI0019144;Name=hsa-mir-5587  
Total reads = 0



**B) Normal fibroblast miRNA sequencing**  
ID=MI0014210\_1;accession\_number=MI0014210;Name=hsa-mir-3176  
Total reads = 0



**C) PPB Case 14 tumor miRNA sequencing**  
ID=MI0014210\_1;accession\_number=MI0014210;Name=hsa-mir-3176  
Total reads = 0



**D) PPB Case 14 cell line miRNA sequencing**  
ID=MI0014210\_1;accession\_number=MI0014210;Name=hsa-mir-3176  
Total reads = 0



**B) Normal fibroblast miRNA sequencing**  
ID=MI0003670\_1;accession\_number=MI0003670;Name=hsa-mir-662  
Total reads = 0



**C) PPB Case 14 tumor miRNA sequencing**  
ID=MI0003670\_1;accession\_number=MI0003670;Name=hsa-mir-662  
Total reads = 0



**D) PPB Case 14 cell line miRNA sequencing**  
ID=MI0003670\_1;accession\_number=MI0003670;Name=hsa-mir-662  
Total reads = 0



**B) Normal fibroblast miRNA sequencing**  
ID=MI0014211\_1;accession\_number=MI0014211;Name=hsa-mir-3177  
Total reads = 0



**C) PPB Case 14 tumor miRNA sequencing**  
ID=MI0014211\_1;accession\_number=MI0014211;Name=hsa-mir-3177  
Total reads = 0



**D) PPB Case 14 cell line miRNA sequencing**  
ID=MI0014211\_1;accession\_number=MI0014211;Name=hsa-mir-3177  
Total reads = 0



**B) Normal fibroblast miRNA sequencing**  
ID=MI0006311\_1;accession\_number=MI0006311;Name=hsa-mir-1225  
Total reads = 0



**C) PPB Case 14 tumor miRNA sequencing**  
ID=MI0006311\_1;accession\_number=MI0006311;Name=hsa-mir-1225  
Total reads = 2

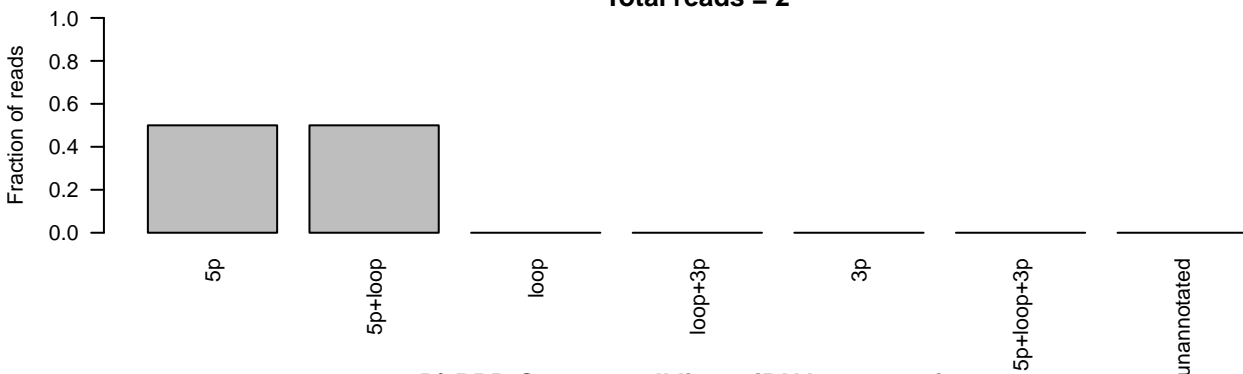

**D) PPB Case 14 cell line miRNA sequencing**  
ID=MI0006311\_1;accession\_number=MI0006311;Name=hsa-mir-1225  
Total reads = 0



**B) Normal fibroblast miRNA sequencing**  
ID=MI0022552\_1;accession\_number=MI0022552;Name=hsa-mir-6511b-1  
Total reads = 0



**C) PPB Case 14 tumor miRNA sequencing**  
ID=MI0022552\_1;accession\_number=MI0022552;Name=hsa-mir-6511b-1  
Total reads = 0



**D) PPB Case 14 cell line miRNA sequencing**  
ID=MI0022552\_1;accession\_number=MI0022552;Name=hsa-mir-6511b-1  
Total reads = 0



**B) Normal fibroblast miRNA sequencing**  
ID=MI0016882\_1;accession\_number=MI0016882;Name=hsa-mir-4516  
Total reads = 0



**C) PPB Case 14 tumor miRNA sequencing**  
ID=MI0016882\_1;accession\_number=MI0016882;Name=hsa-mir-4516  
Total reads = 0



**D) PPB Case 14 cell line miRNA sequencing**  
ID=MI0016882\_1;accession\_number=MI0016882;Name=hsa-mir-4516  
Total reads = 0



**B) Normal fibroblast miRNA sequencing**  
ID=MI0016409\_1;accession\_number=MI0016409;Name=hsa-mir-3180-5  
Total reads = 0



**C) PPB Case 14 tumor miRNA sequencing**  
ID=MI0016409\_1;accession\_number=MI0016409;Name=hsa-mir-3180-5  
Total reads = 0



**D) PPB Case 14 cell line miRNA sequencing**  
ID=MI0016409\_1;accession\_number=MI0016409;Name=hsa-mir-3180-5  
Total reads = 0





**B) Normal fibroblast miRNA sequencing**  
ID=MI0016078\_1;accession\_number=MI0016078;Name=hsa-mir-3677  
Total reads = 0



**C) PPB Case 14 tumor miRNA sequencing**  
ID=MI0016078\_1;accession\_number=MI0016078;Name=hsa-mir-3677  
Total reads = 2



**D) PPB Case 14 cell line miRNA sequencing**  
ID=MI0016078\_1;accession\_number=MI0016078;Name=hsa-mir-3677  
Total reads = 0



**B) Normal fibroblast miRNA sequencing**  
ID=MI0017352\_1;accession\_number=MI0017352;Name=hsa-mir-4717  
Total reads = 0



**C) PPB Case 14 tumor miRNA sequencing**  
ID=MI0017352\_1;accession\_number=MI0017352;Name=hsa-mir-4717  
Total reads = 0



**D) PPB Case 14 cell line miRNA sequencing**  
ID=MI0017352\_1;accession\_number=MI0017352;Name=hsa-mir-4717  
Total reads = 0



**B) Normal fibroblast miRNA sequencing**  
ID=MI0014212\_1;accession\_number=MI0014212;Name=hsa-mir-3178  
Total reads = 0



**C) PPB Case 14 tumor miRNA sequencing**  
ID=MI0014212\_1;accession\_number=MI0014212;Name=hsa-mir-3178  
Total reads = 0



**D) PPB Case 14 cell line miRNA sequencing**  
ID=MI0014212\_1;accession\_number=MI0014212;Name=hsa-mir-3178  
Total reads = 0



**B) Normal fibroblast miRNA sequencing**  
ID=MI0021260\_1;accession\_number=MI0021260;Name=hsa-mir-6126  
Total reads = 0



**C) PPB Case 14 tumor miRNA sequencing**  
ID=MI0021260\_1;accession\_number=MI0021260;Name=hsa-mir-6126  
Total reads = 0



**D) PPB Case 14 cell line miRNA sequencing**  
ID=MI0021260\_1;accession\_number=MI0021260;Name=hsa-mir-6126  
Total reads = 0



**B) Normal fibroblast miRNA sequencing**  
ID=MI0006412\_1;accession\_number=MI0006412;Name=hsa-mir-548h-2  
Total reads = 0



**C) PPB Case 14 tumor miRNA sequencing**  
ID=MI0006412\_1;accession\_number=MI0006412;Name=hsa-mir-548h-2  
Total reads = 0



**D) PPB Case 14 cell line miRNA sequencing**  
ID=MI0006412\_1;accession\_number=MI0006412;Name=hsa-mir-548h-2  
Total reads = 0



**B) Normal fibroblast miRNA sequencing**  
ID=MI0017353\_1;accession\_number=MI0017353;Name=hsa-mir-4718  
Total reads = 0



**C) PPB Case 14 tumor miRNA sequencing**  
ID=MI0017353\_1;accession\_number=MI0017353;Name=hsa-mir-4718  
Total reads = 0



**D) PPB Case 14 cell line miRNA sequencing**  
ID=MI0017353\_1;accession\_number=MI0017353;Name=hsa-mir-4718  
Total reads = 0



**B) Normal fibroblast miRNA sequencing**  
ID=MI0003137\_1;accession\_number=MI0003137;Name=hsa-mir-193b  
Total reads = 0



**C) PPB Case 14 tumor miRNA sequencing**  
ID=MI0003137\_1;accession\_number=MI0003137;Name=hsa-mir-193b  
Total reads = 0



**D) PPB Case 14 cell line miRNA sequencing**  
ID=MI0003137\_1;accession\_number=MI0003137;Name=hsa-mir-193b  
Total reads = 0



**B) Normal fibroblast miRNA sequencing**  
ID=MI0000767\_1;accession\_number=MI0000767;Name=hsa-mir-365a  
Total reads = 0



**C) PPB Case 14 tumor miRNA sequencing**  
ID=MI0000767\_1;accession\_number=MI0000767;Name=hsa-mir-365a  
Total reads = 1

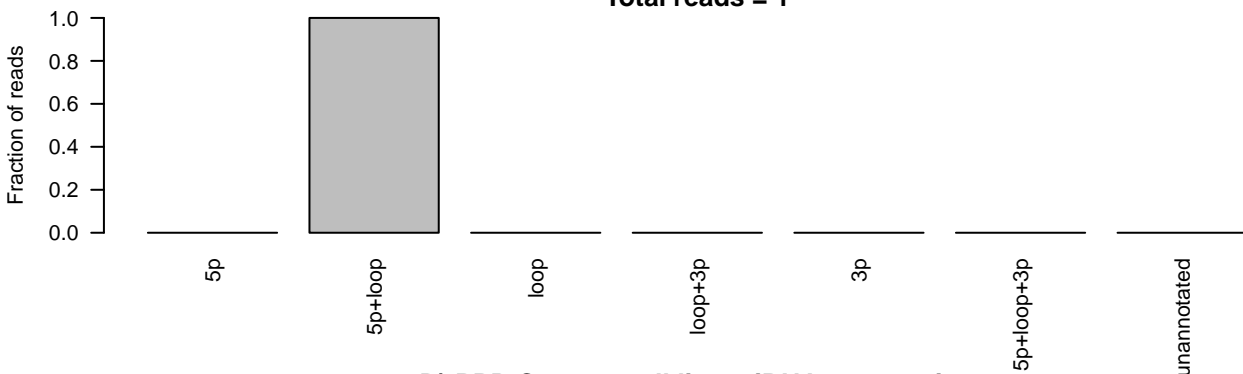

**D) PPB Case 14 cell line miRNA sequencing**  
ID=MI0000767\_1;accession\_number=MI0000767;Name=hsa-mir-365a  
Total reads = 1





**B) Normal fibroblast miRNA sequencing**  
ID=MI0014213\_1;accession\_number=MI0014213;Name=hsa-mir-3179-1  
Total reads = 0



**C) PPB Case 14 tumor miRNA sequencing**  
ID=MI0014213\_1;accession\_number=MI0014213;Name=hsa-mir-3179-1  
Total reads = 0

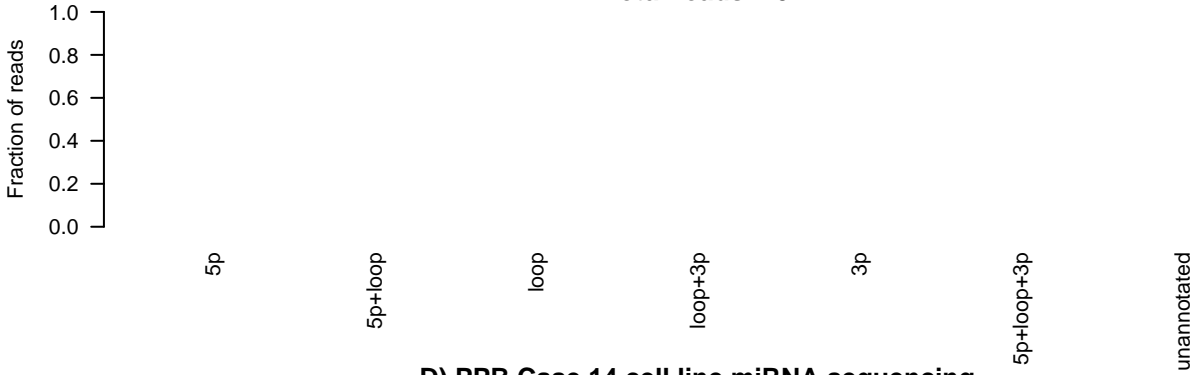

**D) PPB Case 14 cell line miRNA sequencing**  
ID=MI0014213\_1;accession\_number=MI0014213;Name=hsa-mir-3179-1  
Total reads = 0

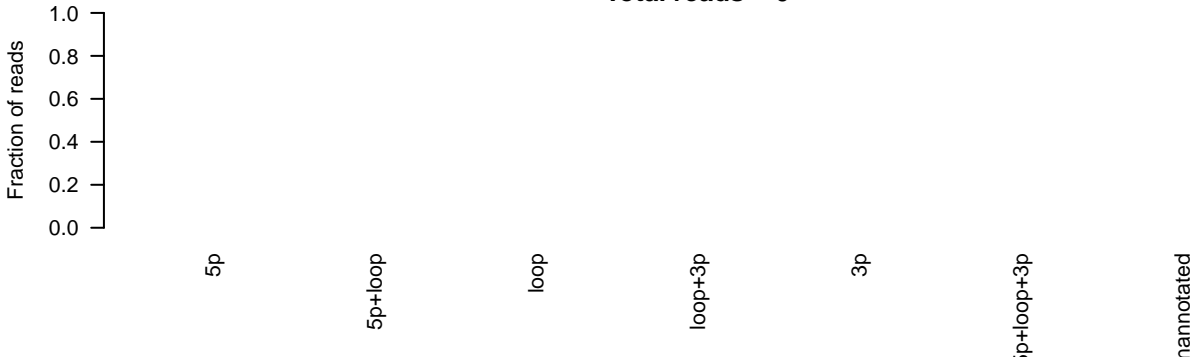

**B) Normal fibroblast miRNA sequencing**  
ID=MI0016071\_1;accession\_number=MI0016071;Name=hsa-mir-3670-1  
Total reads = 0



**C) PPB Case 14 tumor miRNA sequencing**  
ID=MI0016071\_1;accession\_number=MI0016071;Name=hsa-mir-3670-1  
Total reads = 0



**D) PPB Case 14 cell line miRNA sequencing**  
ID=MI0016071\_1;accession\_number=MI0016071;Name=hsa-mir-3670-1  
Total reads = 0



**B) Normal fibroblast miRNA sequencing**  
ID=MI0014214\_1;accession\_number=MI0014214;Name=hsa-mir-3180-1  
Total reads = 0



**C) PPB Case 14 tumor miRNA sequencing**  
ID=MI0014214\_1;accession\_number=MI0014214;Name=hsa-mir-3180-1  
Total reads = 0

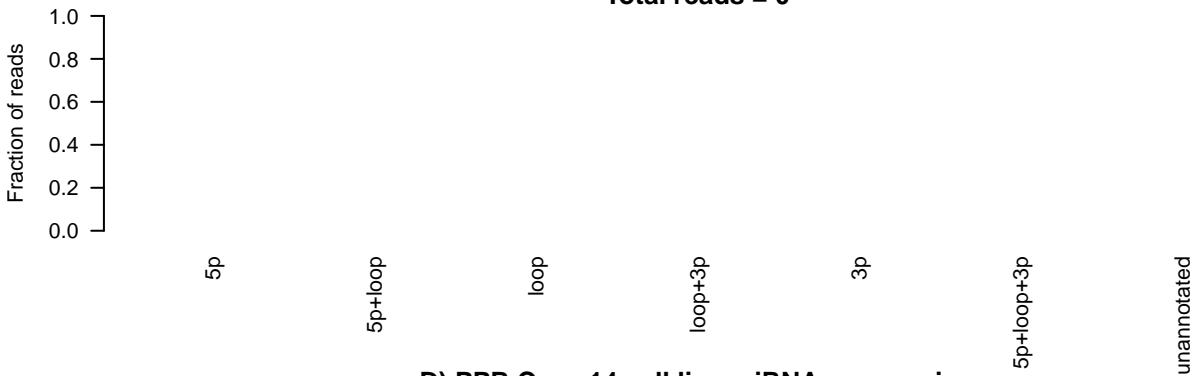

**D) PPB Case 14 cell line miRNA sequencing**  
ID=MI0014214\_1;accession\_number=MI0014214;Name=hsa-mir-3180-1  
Total reads = 0



**B) Normal fibroblast miRNA sequencing**  
ID=MI0022223\_1;accession\_number=MI0022223;Name=hsa-mir-6511a-1  
Total reads = 0



**C) PPB Case 14 tumor miRNA sequencing**  
ID=MI0022223\_1;accession\_number=MI0022223;Name=hsa-mir-6511a-1  
Total reads = 0



**D) PPB Case 14 cell line miRNA sequencing**  
ID=MI0022223\_1;accession\_number=MI0022223;Name=hsa-mir-6511a-1  
Total reads = 0



**B) Normal fibroblast miRNA sequencing**  
ID=MI0009982\_1;accession\_number=MI0009982;Name=hsa-mir-1972-1  
Total reads = 0



**C) PPB Case 14 tumor miRNA sequencing**  
ID=MI0009982\_1;accession\_number=MI0009982;Name=hsa-mir-1972-1  
Total reads = 0



**D) PPB Case 14 cell line miRNA sequencing**  
ID=MI0009982\_1;accession\_number=MI0009982;Name=hsa-mir-1972-1  
Total reads = 0



**B) Normal fibroblast miRNA sequencing**  
ID=MI0022552\_2;accession\_number=MI0022552;Name=hsa-mir-6511b-1  
Total reads = 0



**C) PPB Case 14 tumor miRNA sequencing**  
ID=MI0022552\_2;accession\_number=MI0022552;Name=hsa-mir-6511b-1  
Total reads = 0

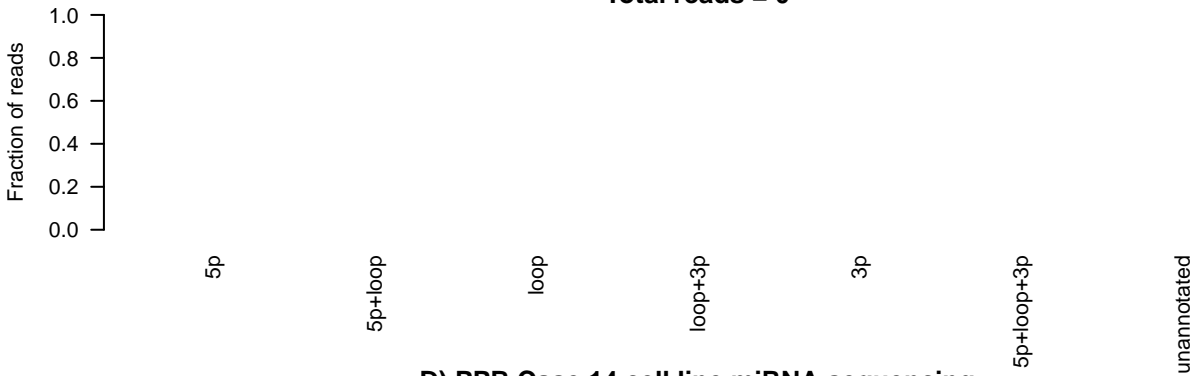

**D) PPB Case 14 cell line miRNA sequencing**  
ID=MI0022552\_2;accession\_number=MI0022552;Name=hsa-mir-6511b-1  
Total reads = 0

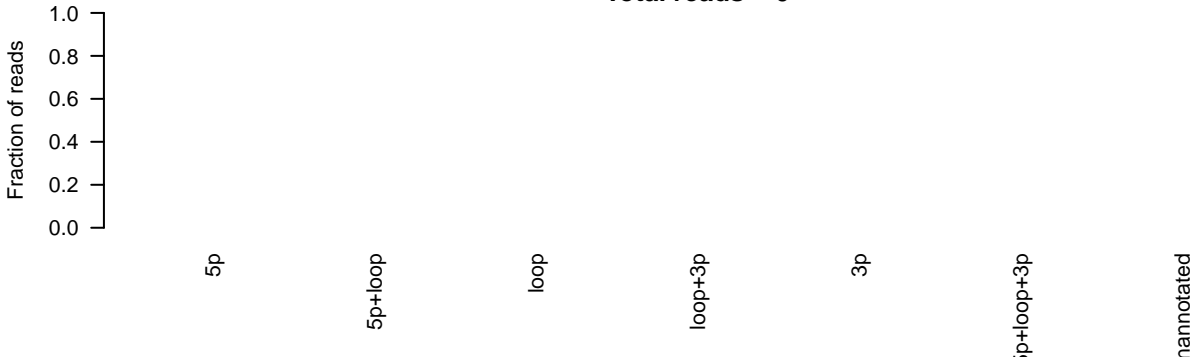

**B) Normal fibroblast miRNA sequencing**  
ID=MI0016408\_1;accession\_number=MI0016408;Name=hsa-mir-3180-4  
Total reads = 0



**C) PPB Case 14 tumor miRNA sequencing**  
ID=MI0016408\_1;accession\_number=MI0016408;Name=hsa-mir-3180-4  
Total reads = 0

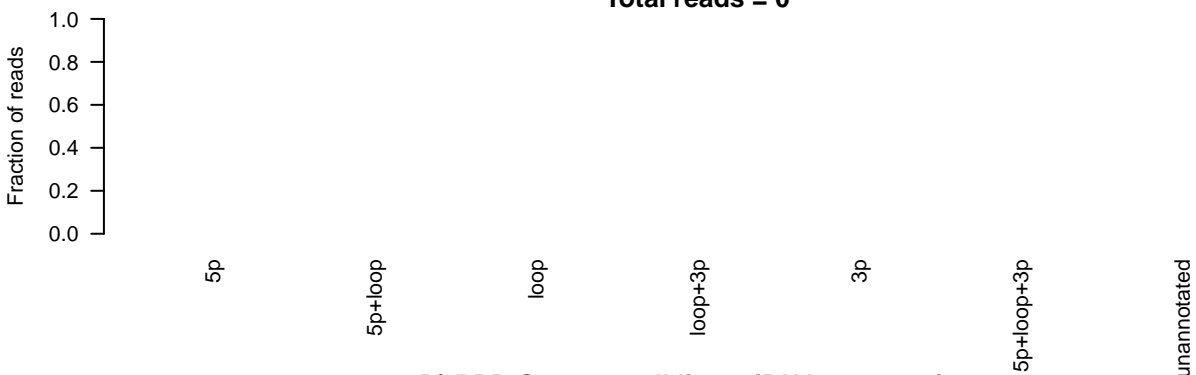

**D) PPB Case 14 cell line miRNA sequencing**  
ID=MI0016408\_1;accession\_number=MI0016408;Name=hsa-mir-3180-4  
Total reads = 0



**B) Normal fibroblast miRNA sequencing**  
ID=MI0022218\_1;accession\_number=MI0022218;Name=hsa-mir-6506  
Total reads = 0



**C) PPB Case 14 tumor miRNA sequencing**  
ID=MI0022218\_1;accession\_number=MI0022218;Name=hsa-mir-6506  
Total reads = 0



**D) PPB Case 14 cell line miRNA sequencing**  
ID=MI0022218\_1;accession\_number=MI0022218;Name=hsa-mir-6506  
Total reads = 0





**B) Normal fibroblast miRNA sequencing**  
ID=MI0014216\_1;accession\_number=MI0014216;Name=hsa-mir-3179-2  
Total reads = 0



**C) PPB Case 14 tumor miRNA sequencing**  
ID=MI0014216\_1;accession\_number=MI0014216;Name=hsa-mir-3179-2  
Total reads = 0



**D) PPB Case 14 cell line miRNA sequencing**  
ID=MI0014216\_1;accession\_number=MI0014216;Name=hsa-mir-3179-2  
Total reads = 0



**B) Normal fibroblast miRNA sequencing**  
ID=MI0019112\_1;accession\_number=MI0019112;Name=hsa-mir-3670-2  
Total reads = 0



**C) PPB Case 14 tumor miRNA sequencing**  
ID=MI0019112\_1;accession\_number=MI0019112;Name=hsa-mir-3670-2  
Total reads = 0



**D) PPB Case 14 cell line miRNA sequencing**  
ID=MI0019112\_1;accession\_number=MI0019112;Name=hsa-mir-3670-2  
Total reads = 0



**B) Normal fibroblast miRNA sequencing**  
ID=MI0014215\_1;accession\_number=MI0014215;Name=hsa-mir-3180-2  
Total reads = 0



**C) PPB Case 14 tumor miRNA sequencing**  
ID=MI0014215\_1;accession\_number=MI0014215;Name=hsa-mir-3180-2  
Total reads = 0



**D) PPB Case 14 cell line miRNA sequencing**  
ID=MI0014215\_1;accession\_number=MI0014215;Name=hsa-mir-3180-2  
Total reads = 0



**B) Normal fibroblast miRNA sequencing**  
ID=MI0023564\_1;accession\_number=MI0023564;Name=hsa-mir-6511a-2  
Total reads = 0



**C) PPB Case 14 tumor miRNA sequencing**  
ID=MI0023564\_1;accession\_number=MI0023564;Name=hsa-mir-6511a-2  
Total reads = 0



**D) PPB Case 14 cell line miRNA sequencing**  
ID=MI0023564\_1;accession\_number=MI0023564;Name=hsa-mir-6511a-2  
Total reads = 0



**B) Normal fibroblast miRNA sequencing**  
ID=MI0023565\_1;accession\_number=MI0023565;Name=hsa-mir-6511a-3  
Total reads = 0



**C) PPB Case 14 tumor miRNA sequencing**  
ID=MI0023565\_1;accession\_number=MI0023565;Name=hsa-mir-6511a-3  
Total reads = 0



**D) PPB Case 14 cell line miRNA sequencing**  
ID=MI0023565\_1;accession\_number=MI0023565;Name=hsa-mir-6511a-3  
Total reads = 0



**B) Normal fibroblast miRNA sequencing**  
ID=MI0023566\_1;accession\_number=MI0023566;Name=hsa-mir-6511a-4  
Total reads = 0



**C) PPB Case 14 tumor miRNA sequencing**  
ID=MI0023566\_1;accession\_number=MI0023566;Name=hsa-mir-6511a-4  
Total reads = 0



**D) PPB Case 14 cell line miRNA sequencing**  
ID=MI0023566\_1;accession\_number=MI0023566;Name=hsa-mir-6511a-4  
Total reads = 0



**B) Normal fibroblast miRNA sequencing**  
ID=MI0014217\_1;accession\_number=MI0014217;Name=hsa-mir-3180-3  
Total reads = 0



**C) PPB Case 14 tumor miRNA sequencing**  
ID=MI0014217\_1;accession\_number=MI0014217;Name=hsa-mir-3180-3  
Total reads = 0



**D) PPB Case 14 cell line miRNA sequencing**  
ID=MI0014217\_1;accession\_number=MI0014217;Name=hsa-mir-3180-3  
Total reads = 0



**B) Normal fibroblast miRNA sequencing**  
ID=MI0014221\_1;accession\_number=MI0014221;Name=hsa-mir-3179-3  
Total reads = 0



**C) PPB Case 14 tumor miRNA sequencing**  
ID=MI0014221\_1;accession\_number=MI0014221;Name=hsa-mir-3179-3  
Total reads = 0



**D) PPB Case 14 cell line miRNA sequencing**  
ID=MI0014221\_1;accession\_number=MI0014221;Name=hsa-mir-3179-3  
Total reads = 0





**B) Normal fibroblast miRNA sequencing**  
ID=MI0016081\_1;accession\_number=MI0016081;Name=hsa-mir-3680-1  
Total reads = 0



**C) PPB Case 14 tumor miRNA sequencing**  
ID=MI0016081\_1;accession\_number=MI0016081;Name=hsa-mir-3680-1  
Total reads = 0



**D) PPB Case 14 cell line miRNA sequencing**  
ID=MI0016081\_1;accession\_number=MI0016081;Name=hsa-mir-3680-1  
Total reads = 0



**B) Normal fibroblast miRNA sequencing**  
ID=MI0014222\_1;accession\_number=MI0014222;Name=hsa-mir-548w  
Total reads = 0



**C) PPB Case 14 tumor miRNA sequencing**  
ID=MI0014222\_1;accession\_number=MI0014222;Name=hsa-mir-548w  
Total reads = 0



**D) PPB Case 14 cell line miRNA sequencing**  
ID=MI0014222\_1;accession\_number=MI0014222;Name=hsa-mir-548w  
Total reads = 0



**B) Normal fibroblast miRNA sequencing**  
ID=MI0017356\_1;accession\_number=MI0017356;Name=hsa-mir-4721  
Total reads = 0



**C) PPB Case 14 tumor miRNA sequencing**  
ID=MI0017356\_1;accession\_number=MI0017356;Name=hsa-mir-4721  
Total reads = 0



**D) PPB Case 14 cell line miRNA sequencing**  
ID=MI0017356\_1;accession\_number=MI0017356;Name=hsa-mir-4721  
Total reads = 0



**B) Normal fibroblast miRNA sequencing**  
ID=MI0019113\_1;accession\_number=MI0019113;Name=hsa-mir-3680-2  
Total reads = 0



**C) PPB Case 14 tumor miRNA sequencing**  
ID=MI0019113\_1;accession\_number=MI0019113;Name=hsa-mir-3680-2  
Total reads = 0



**D) PPB Case 14 cell line miRNA sequencing**  
ID=MI0019113\_1;accession\_number=MI0019113;Name=hsa-mir-3680-2  
Total reads = 0



**B) Normal fibroblast miRNA sequencing**  
ID=MI0016884\_1;accession\_number=MI0016884;Name=hsa-mir-4518  
Total reads = 0



**C) PPB Case 14 tumor miRNA sequencing**  
ID=MI0016884\_1;accession\_number=MI0016884;Name=hsa-mir-4518  
Total reads = 0



**D) PPB Case 14 cell line miRNA sequencing**  
ID=MI0016884\_1;accession\_number=MI0016884;Name=hsa-mir-4518  
Total reads = 0



**B) Normal fibroblast miRNA sequencing**  
ID=MI0016885\_1;accession\_number=MI0016885;Name=hsa-mir-4519  
Total reads = 0



**C) PPB Case 14 tumor miRNA sequencing**  
ID=MI0016885\_1;accession\_number=MI0016885;Name=hsa-mir-4519  
Total reads = 0



**D) PPB Case 14 cell line miRNA sequencing**  
ID=MI0016885\_1;accession\_number=MI0016885;Name=hsa-mir-4519  
Total reads = 0



**B) Normal fibroblast miRNA sequencing**  
ID=MI0003892\_1;accession\_number=MI0003892;Name=hsa-mir-762  
Total reads = 0



**C) PPB Case 14 tumor miRNA sequencing**  
ID=MI0003892\_1;accession\_number=MI0003892;Name=hsa-mir-762  
Total reads = 0



**D) PPB Case 14 cell line miRNA sequencing**  
ID=MI0003892\_1;accession\_number=MI0003892;Name=hsa-mir-762  
Total reads = 0



**B) Normal fibroblast miRNA sequencing**  
ID=MI0014223\_1;accession\_number=MI0014223;Name=hsa-mir-3181  
Total reads = 0



**C) PPB Case 14 tumor miRNA sequencing**  
ID=MI0014223\_1;accession\_number=MI0014223;Name=hsa-mir-3181  
Total reads = 0



**D) PPB Case 14 cell line miRNA sequencing**  
ID=MI0014223\_1;accession\_number=MI0014223;Name=hsa-mir-3181  
Total reads = 0





**B) Normal fibroblast miRNA sequencing**  
ID=MI0016591\_1;accession\_number=MI0016591;Name=hsa-mir-3935  
Total reads = 0



**C) PPB Case 14 tumor miRNA sequencing**  
ID=MI0016591\_1;accession\_number=MI0016591;Name=hsa-mir-3935  
Total reads = 0



**D) PPB Case 14 cell line miRNA sequencing**  
ID=MI0016591\_1;accession\_number=MI0016591;Name=hsa-mir-3935  
Total reads = 0



**B) Normal fibroblast miRNA sequencing**  
ID=MI0000455\_1;accession\_number=MI0000455;Name=hsa-mir-138-2  
Total reads = 0



**C) PPB Case 14 tumor miRNA sequencing**  
ID=MI0000455\_1;accession\_number=MI0000455;Name=hsa-mir-138-2  
Total reads = 1



**D) PPB Case 14 cell line miRNA sequencing**  
ID=MI0000455\_1;accession\_number=MI0000455;Name=hsa-mir-138-2  
Total reads = 0



**B) Normal fibroblast miRNA sequencing**  
ID=MI0000804\_1;accession\_number=MI0000804;Name=hsa-mir-328  
Total reads = 0



**C) PPB Case 14 tumor miRNA sequencing**  
ID=MI0000804\_1;accession\_number=MI0000804;Name=hsa-mir-328  
Total reads = 0



**D) PPB Case 14 cell line miRNA sequencing**  
ID=MI0000804\_1;accession\_number=MI0000804;Name=hsa-mir-328  
Total reads = 0



**B) Normal fibroblast miRNA sequencing**  
ID=MI0007259\_1;accession\_number=MI0007259;Name=hsa-mir-1538  
Total reads = 0



**C) PPB Case 14 tumor miRNA sequencing**  
ID=MI0007259\_1;accession\_number=MI0007259;Name=hsa-mir-1538  
Total reads = 0



**D) PPB Case 14 cell line miRNA sequencing**  
ID=MI0007259\_1;accession\_number=MI0007259;Name=hsa-mir-1538  
Total reads = 0



**B) Normal fibroblast miRNA sequencing**  
ID=MI0015977\_1;accession\_number=MI0015977;Name=hsa-mir-1972-2  
Total reads = 0



**C) PPB Case 14 tumor miRNA sequencing**  
ID=MI0015977\_1;accession\_number=MI0015977;Name=hsa-mir-1972-2  
Total reads = 0



**D) PPB Case 14 cell line miRNA sequencing**  
ID=MI0015977\_1;accession\_number=MI0015977;Name=hsa-mir-1972-2  
Total reads = 0



**B) Normal fibroblast miRNA sequencing**  
ID=MI0017354\_1;accession\_number=MI0017354;Name=hsa-mir-4719  
Total reads = 0



**C) PPB Case 14 tumor miRNA sequencing**  
ID=MI0017354\_1;accession\_number=MI0017354;Name=hsa-mir-4719  
Total reads = 0



**D) PPB Case 14 cell line miRNA sequencing**  
ID=MI0017354\_1;accession\_number=MI0017354;Name=hsa-mir-4719  
Total reads = 0



**B) Normal fibroblast miRNA sequencing**  
ID=MI0017355\_1;accession\_number=MI0017355;Name=hsa-mir-4720  
Total reads = 0



**C) PPB Case 14 tumor miRNA sequencing**  
ID=MI0017355\_1;accession\_number=MI0017355;Name=hsa-mir-4720  
Total reads = 0



**D) PPB Case 14 cell line miRNA sequencing**  
ID=MI0017355\_1;accession\_number=MI0017355;Name=hsa-mir-4720  
Total reads = 0



**B) Normal fibroblast miRNA sequencing**  
ID=MI0022216\_1;accession\_number=MI0022216;Name=hsa-mir-6504  
Total reads = 0



**C) PPB Case 14 tumor miRNA sequencing**  
ID=MI0022216\_1;accession\_number=MI0022216;Name=hsa-mir-6504  
Total reads = 0



**D) PPB Case 14 cell line miRNA sequencing**  
ID=MI0022216\_1;accession\_number=MI0022216;Name=hsa-mir-6504  
Total reads = 0





**B) Normal fibroblast miRNA sequencing**  
ID=MI0014224\_1;accession\_number=MI0014224;Name=hsa-mir-3182  
Total reads = 0



**C) PPB Case 14 tumor miRNA sequencing**  
ID=MI0014224\_1;accession\_number=MI0014224;Name=hsa-mir-3182  
Total reads = 0



**D) PPB Case 14 cell line miRNA sequencing**  
ID=MI0014224\_1;accession\_number=MI0014224;Name=hsa-mir-3182  
Total reads = 0



**B) Normal fibroblast miRNA sequencing**  
ID=MI0017982\_1;accession\_number=MI0017982;Name=hsa-mir-5093  
Total reads = 0



**C) PPB Case 14 tumor miRNA sequencing**  
ID=MI0017982\_1;accession\_number=MI0017982;Name=hsa-mir-5093  
Total reads = 0



**D) PPB Case 14 cell line miRNA sequencing**  
ID=MI0017982\_1;accession\_number=MI0017982;Name=hsa-mir-5093  
Total reads = 0



**B) Normal fibroblast miRNA sequencing**  
ID=MI0008331\_1;accession\_number=MI0008331;Name=hsa-mir-1910  
Total reads = 0



**C) PPB Case 14 tumor miRNA sequencing**  
ID=MI0008331\_1;accession\_number=MI0008331;Name=hsa-mir-1910  
Total reads = 0



**D) PPB Case 14 cell line miRNA sequencing**  
ID=MI0008331\_1;accession\_number=MI0008331;Name=hsa-mir-1910  
Total reads = 0

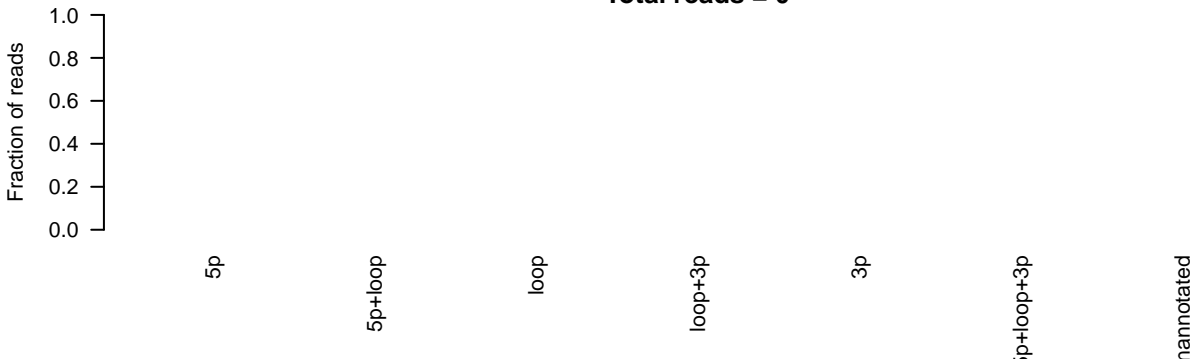

**B) Normal fibroblast miRNA sequencing**  
ID=MI0018168\_1;accession\_number=MI0018168;Name=hsa-mir-5189  
Total reads = 0



**C) PPB Case 14 tumor miRNA sequencing**  
ID=MI0018168\_1;accession\_number=MI0018168;Name=hsa-mir-5189  
Total reads = 0



**D) PPB Case 14 cell line miRNA sequencing**  
ID=MI0018168\_1;accession\_number=MI0018168;Name=hsa-mir-5189  
Total reads = 0



**B) Normal fibroblast miRNA sequencing**  
ID=MI0017357\_1;accession\_number=MI0017357;Name=hsa-mir-4722  
Total reads = 0



**C) PPB Case 14 tumor miRNA sequencing**  
ID=MI0017357\_1;accession\_number=MI0017357;Name=hsa-mir-4722  
Total reads = 0



**D) PPB Case 14 cell line miRNA sequencing**  
ID=MI0017357\_1;accession\_number=MI0017357;Name=hsa-mir-4722  
Total reads = 0



**B) Normal fibroblast miRNA sequencing**  
ID=MI0014225\_1;accession\_number=MI0014225;Name=hsa-mir-3183  
Total reads = 0



**C) PPB Case 14 tumor miRNA sequencing**  
ID=MI0014225\_1;accession\_number=MI0014225;Name=hsa-mir-3183  
Total reads = 0



**D) PPB Case 14 cell line miRNA sequencing**  
ID=MI0014225\_1;accession\_number=MI0014225;Name=hsa-mir-3183  
Total reads = 0



**B) Normal fibroblast miRNA sequencing**  
ID=MI0006387\_1;accession\_number=MI0006387;Name=hsa-mir-1253  
Total reads = 0



**C) PPB Case 14 tumor miRNA sequencing**  
ID=MI0006387\_1;accession\_number=MI0006387;Name=hsa-mir-1253  
Total reads = 0



**D) PPB Case 14 cell line miRNA sequencing**  
ID=MI0006387\_1;accession\_number=MI0006387;Name=hsa-mir-1253  
Total reads = 0



**B) Normal fibroblast miRNA sequencing**  
ID=MI0016886\_1;accession\_number=MI0016886;Name=hsa-mir-4520a  
Total reads = 0



**C) PPB Case 14 tumor miRNA sequencing**  
ID=MI0016886\_1;accession\_number=MI0016886;Name=hsa-mir-4520a  
Total reads = 0



**D) PPB Case 14 cell line miRNA sequencing**  
ID=MI0016886\_1;accession\_number=MI0016886;Name=hsa-mir-4520a  
Total reads = 0





**B) Normal fibroblast miRNA sequencing**  
ID=MI0017358\_1;accession\_number=MI0017358;Name=hsa-mir-4520b  
Total reads = 0



**C) PPB Case 14 tumor miRNA sequencing**  
ID=MI0017358\_1;accession\_number=MI0017358;Name=hsa-mir-4520b  
Total reads = 0



**D) PPB Case 14 cell line miRNA sequencing**  
ID=MI0017358\_1;accession\_number=MI0017358;Name=hsa-mir-4520b  
Total reads = 0



**B) Normal fibroblast miRNA sequencing**  
ID=MI0015846\_1;accession\_number=MI0015846;Name=hsa-mir-4314  
Total reads = 0



**C) PPB Case 14 tumor miRNA sequencing**  
ID=MI0015846\_1;accession\_number=MI0015846;Name=hsa-mir-4314  
Total reads = 0



**D) PPB Case 14 cell line miRNA sequencing**  
ID=MI0015846\_1;accession\_number=MI0015846;Name=hsa-mir-4314  
Total reads = 0



**B) Normal fibroblast miRNA sequencing**  
ID=MI0016888\_1;accession\_number=MI0016888;Name=hsa-mir-1269b  
Total reads = 0



**C) PPB Case 14 tumor miRNA sequencing**  
ID=MI0016888\_1;accession\_number=MI0016888;Name=hsa-mir-1269b  
Total reads = 0



**D) PPB Case 14 cell line miRNA sequencing**  
ID=MI0016888\_1;accession\_number=MI0016888;Name=hsa-mir-1269b  
Total reads = 0



**B) Normal fibroblast miRNA sequencing**  
ID=MI0006413\_1;accession\_number=MI0006413;Name=hsa-mir-548h-3  
Total reads = 0



**C) PPB Case 14 tumor miRNA sequencing**  
ID=MI0006413\_1;accession\_number=MI0006413;Name=hsa-mir-548h-3  
Total reads = 0



**D) PPB Case 14 cell line miRNA sequencing**  
ID=MI0006413\_1;accession\_number=MI0006413;Name=hsa-mir-548h-3  
Total reads = 0



**B) Normal fibroblast miRNA sequencing**  
ID=MI0017368\_1;accession\_number=MI0017368;Name=hsa-mir-4731  
Total reads = 0



**C) PPB Case 14 tumor miRNA sequencing**  
ID=MI0017368\_1;accession\_number=MI0017368;Name=hsa-mir-4731  
Total reads = 0



**D) PPB Case 14 cell line miRNA sequencing**  
ID=MI0017368\_1;accession\_number=MI0017368;Name=hsa-mir-4731  
Total reads = 0



**B) Normal fibroblast miRNA sequencing**  
ID=MI0006432\_1;accession\_number=MI0006432;Name=hsa-mir-1288  
Total reads = 0



**C) PPB Case 14 tumor miRNA sequencing**  
ID=MI0006432\_1;accession\_number=MI0006432;Name=hsa-mir-1288  
Total reads = 0



**D) PPB Case 14 cell line miRNA sequencing**  
ID=MI0006432\_1;accession\_number=MI0006432;Name=hsa-mir-1288  
Total reads = 0



**B) Normal fibroblast miRNA sequencing**  
ID=MI0016889\_1;accession\_number=MI0016889;Name=hsa-mir-4522  
Total reads = 0



**C) PPB Case 14 tumor miRNA sequencing**  
ID=MI0016889\_1;accession\_number=MI0016889;Name=hsa-mir-4522  
Total reads = 0



**D) PPB Case 14 cell line miRNA sequencing**  
ID=MI0016889\_1;accession\_number=MI0016889;Name=hsa-mir-4522  
Total reads = 0



**B) Normal fibroblast miRNA sequencing**  
ID=MI0017359\_1;accession\_number=MI0017359;Name=hsa-mir-4723  
Total reads = 0



**C) PPB Case 14 tumor miRNA sequencing**  
ID=MI0017359\_1;accession\_number=MI0017359;Name=hsa-mir-4723  
Total reads = 0



**D) PPB Case 14 cell line miRNA sequencing**  
ID=MI0017359\_1;accession\_number=MI0017359;Name=hsa-mir-4723  
Total reads = 0





**B) Normal fibroblast miRNA sequencing**  
ID=MI0000460\_1;accession\_number=MI0000460;Name=hsa-mir-144  
Total reads = 0



**C) PPB Case 14 tumor miRNA sequencing**  
ID=MI0000460\_1;accession\_number=MI0000460;Name=hsa-mir-144  
Total reads = 8

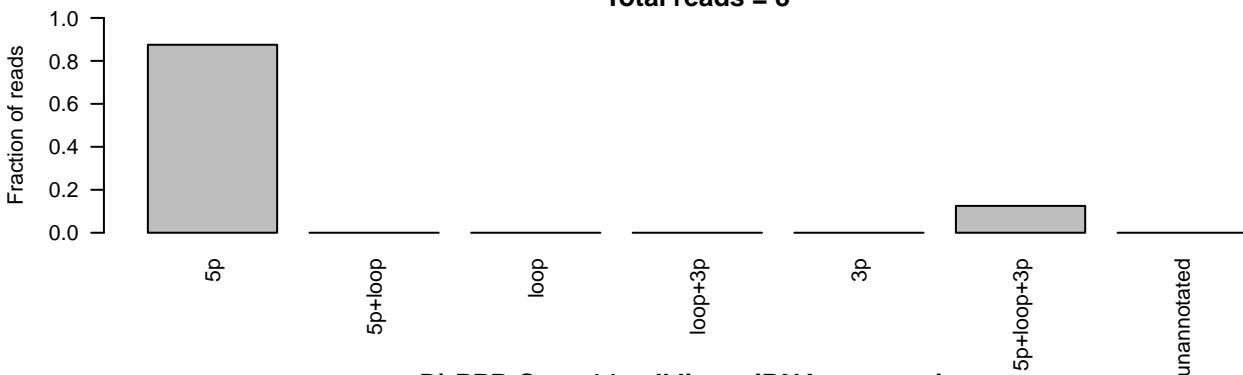

**D) PPB Case 14 cell line miRNA sequencing**  
ID=MI0000460\_1;accession\_number=MI0000460;Name=hsa-mir-144  
Total reads = 0



**B) Normal fibroblast miRNA sequencing**  
ID=MI0017369\_1;accession\_number=MI0017369;Name=hsa-mir-4732  
Total reads = 0



**C) PPB Case 14 tumor miRNA sequencing**  
ID=MI0017369\_1;accession\_number=MI0017369;Name=hsa-mir-4732  
Total reads = 0



**D) PPB Case 14 cell line miRNA sequencing**  
ID=MI0017369\_1;accession\_number=MI0017369;Name=hsa-mir-4732  
Total reads = 0



**B) Normal fibroblast miRNA sequencing**  
ID=MI0016890\_1;accession\_number=MI0016890;Name=hsa-mir-4523  
Total reads = 0



**C) PPB Case 14 tumor miRNA sequencing**  
ID=MI0016890\_1;accession\_number=MI0016890;Name=hsa-mir-4523  
Total reads = 0



**D) PPB Case 14 cell line miRNA sequencing**  
ID=MI0016890\_1;accession\_number=MI0016890;Name=hsa-mir-4523  
Total reads = 0



**B) Normal fibroblast miRNA sequencing**  
ID=MI0017370\_1;accession\_number=MI0017370;Name=hsa-mir-4733  
Total reads = 0



**C) PPB Case 14 tumor miRNA sequencing**  
ID=MI0017370\_1;accession\_number=MI0017370;Name=hsa-mir-4733  
Total reads = 0



**D) PPB Case 14 cell line miRNA sequencing**  
ID=MI0017370\_1;accession\_number=MI0017370;Name=hsa-mir-4733  
Total reads = 0



**B) Normal fibroblast miRNA sequencing**  
ID=MI0017361\_1;accession\_number=MI0017361;Name=hsa-mir-4724  
Total reads = 0



**C) PPB Case 14 tumor miRNA sequencing**  
ID=MI0017361\_1;accession\_number=MI0017361;Name=hsa-mir-4724  
Total reads = 0



**D) PPB Case 14 cell line miRNA sequencing**  
ID=MI0017361\_1;accession\_number=MI0017361;Name=hsa-mir-4724  
Total reads = 0



**B) Normal fibroblast miRNA sequencing**  
ID=MI0000487\_1;accession\_number=MI0000487;Name=hsa-mir-193a  
Total reads = 0



**C) PPB Case 14 tumor miRNA sequencing**  
ID=MI0000487\_1;accession\_number=MI0000487;Name=hsa-mir-193a  
Total reads = 4

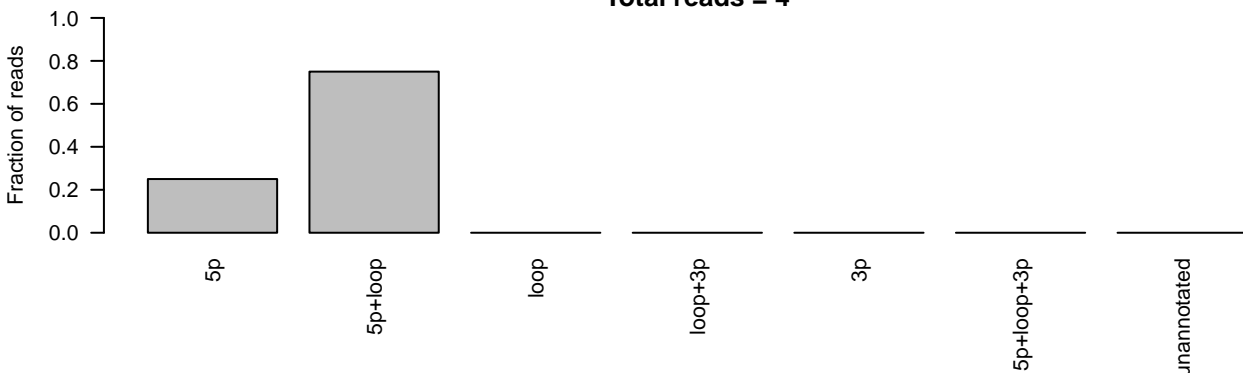

**D) PPB Case 14 cell line miRNA sequencing**  
ID=MI0000487\_1;accession\_number=MI0000487;Name=hsa-mir-193a  
Total reads = 4

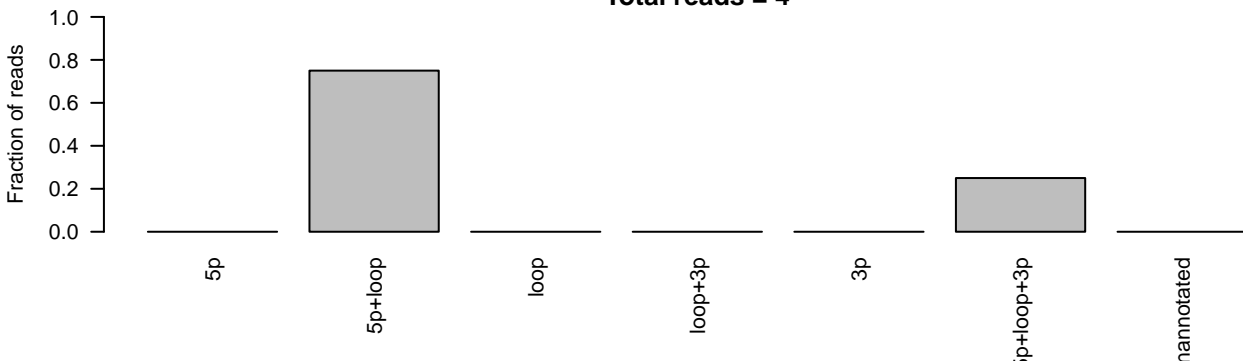

**B) Normal fibroblast miRNA sequencing**  
ID=MI0017362\_1;accession\_number=MI0017362;Name=hsa-mir-4725  
Total reads = 0



**C) PPB Case 14 tumor miRNA sequencing**  
ID=MI0017362\_1;accession\_number=MI0017362;Name=hsa-mir-4725  
Total reads = 0



**D) PPB Case 14 cell line miRNA sequencing**  
ID=MI0017362\_1;accession\_number=MI0017362;Name=hsa-mir-4725  
Total reads = 0



**B) Normal fibroblast miRNA sequencing**  
ID=MI0003647\_1;accession\_number=MI0003647;Name=hsa-mir-632  
Total reads = 0



**C) PPB Case 14 tumor miRNA sequencing**  
ID=MI0003647\_1;accession\_number=MI0003647;Name=hsa-mir-632  
Total reads = 0



**D) PPB Case 14 cell line miRNA sequencing**  
ID=MI0003647\_1;accession\_number=MI0003647;Name=hsa-mir-632  
Total reads = 0





**B) Normal fibroblast miRNA sequencing**  
ID=MI0013083\_1;accession\_number=MI0013083;Name=hsa-mir-2909  
Total reads = 0



**C) PPB Case 14 tumor miRNA sequencing**  
ID=MI0013083\_1;accession\_number=MI0013083;Name=hsa-mir-2909  
Total reads = 0



**D) PPB Case 14 cell line miRNA sequencing**  
ID=MI0013083\_1;accession\_number=MI0013083;Name=hsa-mir-2909  
Total reads = 0



**B) Normal fibroblast miRNA sequencing**  
ID=MI0021273\_1;accession\_number=MI0021273;Name=hsa-mir-378j  
Total reads = 0



**C) PPB Case 14 tumor miRNA sequencing**  
ID=MI0021273\_1;accession\_number=MI0021273;Name=hsa-mir-378j  
Total reads = 0



**D) PPB Case 14 cell line miRNA sequencing**  
ID=MI0021273\_1;accession\_number=MI0021273;Name=hsa-mir-378j  
Total reads = 0



**B) Normal fibroblast miRNA sequencing**  
ID=MI0017371\_1;accession\_number=MI0017371;Name=hsa-mir-4734  
Total reads = 0



**C) PPB Case 14 tumor miRNA sequencing**  
ID=MI0017371\_1;accession\_number=MI0017371;Name=hsa-mir-4734  
Total reads = 0



**D) PPB Case 14 cell line miRNA sequencing**  
ID=MI0017371\_1;accession\_number=MI0017371;Name=hsa-mir-4734  
Total reads = 0



**B) Normal fibroblast miRNA sequencing**  
ID=MI0017363\_1;accession\_number=MI0017363;Name=hsa-mir-4726  
Total reads = 0



**C) PPB Case 14 tumor miRNA sequencing**  
ID=MI0017363\_1;accession\_number=MI0017363;Name=hsa-mir-4726  
Total reads = 1



**D) PPB Case 14 cell line miRNA sequencing**  
ID=MI0017363\_1;accession\_number=MI0017363;Name=hsa-mir-4726  
Total reads = 0



**B) Normal fibroblast miRNA sequencing**  
ID=MI0017364\_1;accession\_number=MI0017364;Name=hsa-mir-4727  
Total reads = 0



**C) PPB Case 14 tumor miRNA sequencing**  
ID=MI0017364\_1;accession\_number=MI0017364;Name=hsa-mir-4727  
Total reads = 0



**D) PPB Case 14 cell line miRNA sequencing**  
ID=MI0017364\_1;accession\_number=MI0017364;Name=hsa-mir-4727  
Total reads = 0



**B) Normal fibroblast miRNA sequencing**  
ID=MI0022222\_1;accession\_number=MI0022222;Name=hsa-mir-6510  
Total reads = 0



**C) PPB Case 14 tumor miRNA sequencing**  
ID=MI0022222\_1;accession\_number=MI0022222;Name=hsa-mir-6510  
Total reads = 0



**D) PPB Case 14 cell line miRNA sequencing**  
ID=MI0022222\_1;accession\_number=MI0022222;Name=hsa-mir-6510  
Total reads = 0



**B) Normal fibroblast miRNA sequencing**  
ID=MI0019137\_1;accession\_number=MI0019137;Name=hsa-mir-548at  
Total reads = 0

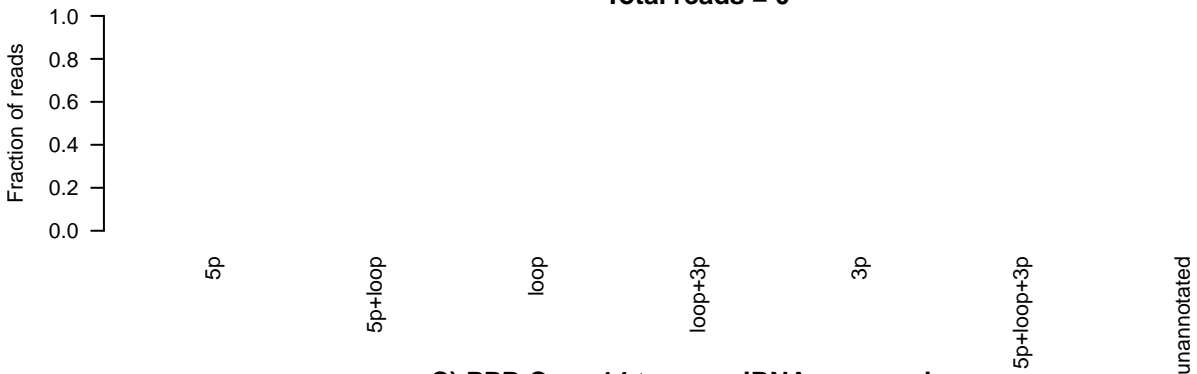

**C) PPB Case 14 tumor miRNA sequencing**  
ID=MI0019137\_1;accession\_number=MI0019137;Name=hsa-mir-548at  
Total reads = 0

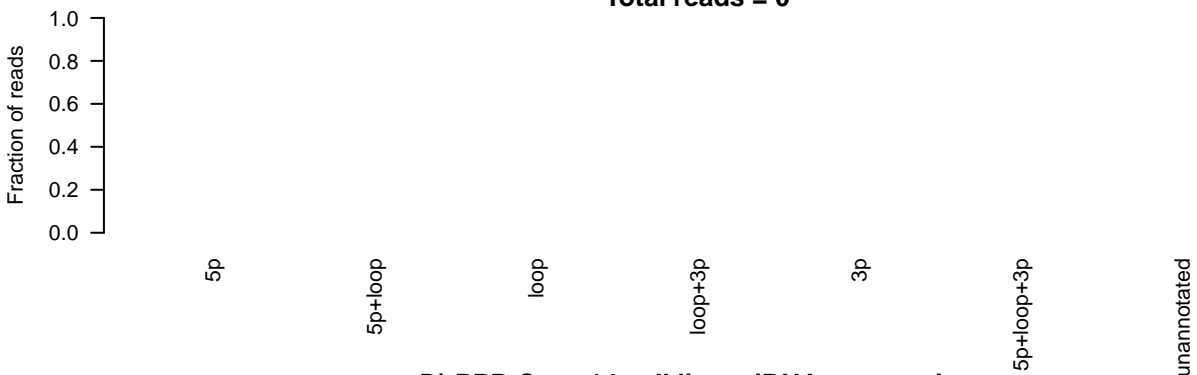

**D) PPB Case 14 cell line miRNA sequencing**  
ID=MI0019137\_1;accession\_number=MI0019137;Name=hsa-mir-548at  
Total reads = 0



**B) Normal fibroblast miRNA sequencing**  
ID=MI0017878\_1;accession\_number=MI0017878;Name=hsa-mir-5010  
Total reads = 0



**C) PPB Case 14 tumor miRNA sequencing**  
ID=MI0017878\_1;accession\_number=MI0017878;Name=hsa-mir-5010  
Total reads = 0



**D) PPB Case 14 cell line miRNA sequencing**  
ID=MI0017878\_1;accession\_number=MI0017878;Name=hsa-mir-5010  
Total reads = 0





**B) Normal fibroblast miRNA sequencing**  
ID=MI0010636\_1;accession\_number=MI0010636;Name=hsa-mir-2117  
Total reads = 0



**C) PPB Case 14 tumor miRNA sequencing**  
ID=MI0010636\_1;accession\_number=MI0010636;Name=hsa-mir-2117  
Total reads = 0



**D) PPB Case 14 cell line miRNA sequencing**  
ID=MI0010636\_1;accession\_number=MI0010636;Name=hsa-mir-2117  
Total reads = 0



**B) Normal fibroblast miRNA sequencing**  
ID=MI0015844\_1;accession\_number=MI0015844;Name=hsa-mir-4315-1  
Total reads = 0



**C) PPB Case 14 tumor miRNA sequencing**  
ID=MI0015844\_1;accession\_number=MI0015844;Name=hsa-mir-4315-1  
Total reads = 0



**D) PPB Case 14 cell line miRNA sequencing**  
ID=MI0015844\_1;accession\_number=MI0015844;Name=hsa-mir-4315-1  
Total reads = 0



**B) Normal fibroblast miRNA sequencing**  
ID=MI0017978\_1;accession\_number=MI0017978;Name=hsa-mir-5089  
Total reads = 0



**C) PPB Case 14 tumor miRNA sequencing**  
ID=MI0017978\_1;accession\_number=MI0017978;Name=hsa-mir-5089  
Total reads = 0



**D) PPB Case 14 cell line miRNA sequencing**  
ID=MI0017978\_1;accession\_number=MI0017978;Name=hsa-mir-5089  
Total reads = 0



**B) Normal fibroblast miRNA sequencing**  
ID=MI0006335\_1;accession\_number=MI0006335;Name=hsa-mir-1203  
Total reads = 0



**C) PPB Case 14 tumor miRNA sequencing**  
ID=MI0006335\_1;accession\_number=MI0006335;Name=hsa-mir-1203  
Total reads = 0



**D) PPB Case 14 cell line miRNA sequencing**  
ID=MI0006335\_1;accession\_number=MI0006335;Name=hsa-mir-1203  
Total reads = 0



**B) Normal fibroblast miRNA sequencing**  
ID=MI0000238\_1;accession\_number=MI0000238;Name=hsa-mir-196a-1  
Total reads = 0



**C) PPB Case 14 tumor miRNA sequencing**  
ID=MI0000238\_1;accession\_number=MI0000238;Name=hsa-mir-196a-1  
Total reads = 0



**D) PPB Case 14 cell line miRNA sequencing**  
ID=MI0000238\_1;accession\_number=MI0000238;Name=hsa-mir-196a-1  
Total reads = 0



**B) Normal fibroblast miRNA sequencing**  
ID=MI0014227\_1;accession\_number=MI0014227;Name=hsa-mir-3185  
Total reads = 0



**C) PPB Case 14 tumor miRNA sequencing**  
ID=MI0014227\_1;accession\_number=MI0014227;Name=hsa-mir-3185  
Total reads = 0



**D) PPB Case 14 cell line miRNA sequencing**  
ID=MI0014227\_1;accession\_number=MI0014227;Name=hsa-mir-3185  
Total reads = 0



**B) Normal fibroblast miRNA sequencing**  
ID=MI0021274\_1;accession\_number=MI0021274;Name=hsa-mir-6129  
Total reads = 0



**C) PPB Case 14 tumor miRNA sequencing**  
ID=MI0021274\_1;accession\_number=MI0021274;Name=hsa-mir-6129  
Total reads = 0



**D) PPB Case 14 cell line miRNA sequencing**  
ID=MI0021274\_1;accession\_number=MI0021274;Name=hsa-mir-6129  
Total reads = 0



**B) Normal fibroblast miRNA sequencing**  
ID=MI0021472\_1;accession\_number=MI0021472;Name=hsa-mir-6165  
Total reads = 0



**C) PPB Case 14 tumor miRNA sequencing**  
ID=MI0021472\_1;accession\_number=MI0021472;Name=hsa-mir-6165  
Total reads = 0



**D) PPB Case 14 cell line miRNA sequencing**  
ID=MI0021472\_1;accession\_number=MI0021472;Name=hsa-mir-6165  
Total reads = 0





**B) Normal fibroblast miRNA sequencing**  
ID=MI0016004\_1;accession\_number=MI0016004;Name=hsa-mir-3614  
Total reads = 0



**C) PPB Case 14 tumor miRNA sequencing**  
ID=MI0016004\_1;accession\_number=MI0016004;Name=hsa-mir-3614  
Total reads = 0



**D) PPB Case 14 cell line miRNA sequencing**  
ID=MI0016004\_1;accession\_number=MI0016004;Name=hsa-mir-3614  
Total reads = 0



**B) Normal fibroblast miRNA sequencing**  
ID=MI0000458\_1;accession\_number=MI0000458;Name=hsa-mir-142  
Total reads = 0



**C) PPB Case 14 tumor miRNA sequencing**  
ID=MI0000458\_1;accession\_number=MI0000458;Name=hsa-mir-142  
Total reads = 45

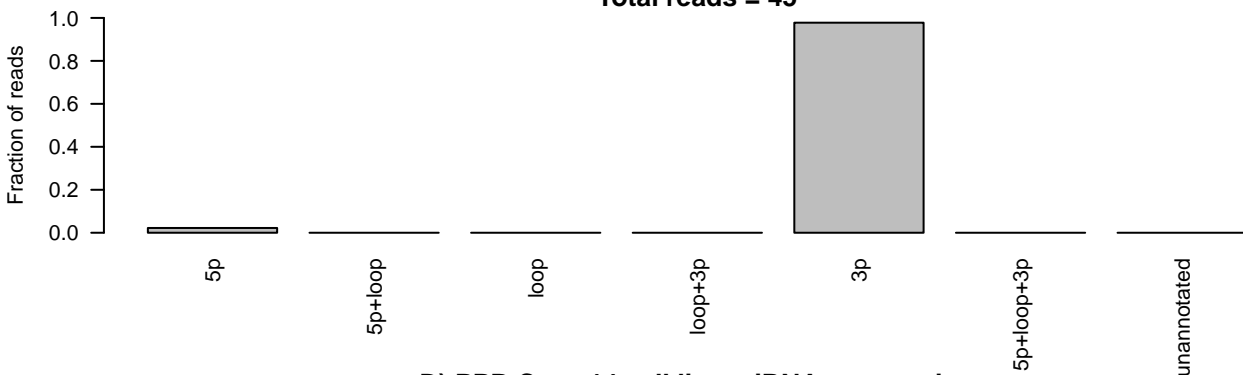

**D) PPB Case 14 cell line miRNA sequencing**  
ID=MI0000458\_1;accession\_number=MI0000458;Name=hsa-mir-142  
Total reads = 0



**B) Normal fibroblast miRNA sequencing**  
ID=MI0017373\_1;accession\_number=MI0017373;Name=hsa-mir-4736  
Total reads = 0



**C) PPB Case 14 tumor miRNA sequencing**  
ID=MI0017373\_1;accession\_number=MI0017373;Name=hsa-mir-4736  
Total reads = 0



**D) PPB Case 14 cell line miRNA sequencing**  
ID=MI0017373\_1;accession\_number=MI0017373;Name=hsa-mir-4736  
Total reads = 0



**B) Normal fibroblast miRNA sequencing**  
ID=MI0017366\_1;accession\_number=MI0017366;Name=hsa-mir-4729  
Total reads = 0



**C) PPB Case 14 tumor miRNA sequencing**  
ID=MI0017366\_1;accession\_number=MI0017366;Name=hsa-mir-4729  
Total reads = 0



**D) PPB Case 14 cell line miRNA sequencing**  
ID=MI0017366\_1;accession\_number=MI0017366;Name=hsa-mir-4729  
Total reads = 0



**B) Normal fibroblast miRNA sequencing**  
ID=MI0017374\_1;accession\_number=MI0017374;Name=hsa-mir-4737  
Total reads = 0



**C) PPB Case 14 tumor miRNA sequencing**  
ID=MI0017374\_1;accession\_number=MI0017374;Name=hsa-mir-4737  
Total reads = 0



**D) PPB Case 14 cell line miRNA sequencing**  
ID=MI0017374\_1;accession\_number=MI0017374;Name=hsa-mir-4737  
Total reads = 0



**B) Normal fibroblast miRNA sequencing**  
ID=MI0003648\_1;accession\_number=MI0003648;Name=hsa-mir-633  
Total reads = 0



**C) PPB Case 14 tumor miRNA sequencing**  
ID=MI0003648\_1;accession\_number=MI0003648;Name=hsa-mir-633  
Total reads = 0



**D) PPB Case 14 cell line miRNA sequencing**  
ID=MI0003648\_1;accession\_number=MI0003648;Name=hsa-mir-633  
Total reads = 0



**B) Normal fibroblast miRNA sequencing**  
ID=MI0017375\_1;accession\_number=MI0017375;Name=hsa-mir-3064  
Total reads = 0



**C) PPB Case 14 tumor miRNA sequencing**  
ID=MI0017375\_1;accession\_number=MI0017375;Name=hsa-mir-3064  
Total reads = 1



**D) PPB Case 14 cell line miRNA sequencing**  
ID=MI0017375\_1;accession\_number=MI0017375;Name=hsa-mir-3064  
Total reads = 0



**B) Normal fibroblast miRNA sequencing**  
ID=MI0017932\_1;accession\_number=MI0017932;Name=hsa-mir-5047  
Total reads = 0



**C) PPB Case 14 tumor miRNA sequencing**  
ID=MI0017932\_1;accession\_number=MI0017932;Name=hsa-mir-5047  
Total reads = 0



**D) PPB Case 14 cell line miRNA sequencing**  
ID=MI0017932\_1;accession\_number=MI0017932;Name=hsa-mir-5047  
Total reads = 0





**B) Normal fibroblast miRNA sequencing**  
ID=MI0020357\_1;accession\_number=MI0020357;Name=hsa-mir-6080  
Total reads = 0



**C) PPB Case 14 tumor miRNA sequencing**  
ID=MI0020357\_1;accession\_number=MI0020357;Name=hsa-mir-6080  
Total reads = 0



**D) PPB Case 14 cell line miRNA sequencing**  
ID=MI0020357\_1;accession\_number=MI0020357;Name=hsa-mir-6080  
Total reads = 0



**B) Normal fibroblast miRNA sequencing**  
ID=MI0015983\_1;accession\_number=MI0015983;Name=hsa-mir-4315-2  
Total reads = 0



**C) PPB Case 14 tumor miRNA sequencing**  
ID=MI0015983\_1;accession\_number=MI0015983;Name=hsa-mir-4315-2  
Total reads = 0



**D) PPB Case 14 cell line miRNA sequencing**  
ID=MI0015983\_1;accession\_number=MI0015983;Name=hsa-mir-4315-2  
Total reads = 0



**B) Normal fibroblast miRNA sequencing**  
ID=MI0003649\_1;accession\_number=MI0003649;Name=hsa-mir-634  
Total reads = 0



**C) PPB Case 14 tumor miRNA sequencing**  
ID=MI0003649\_1;accession\_number=MI0003649;Name=hsa-mir-634  
Total reads = 0



**D) PPB Case 14 cell line miRNA sequencing**  
ID=MI0003649\_1;accession\_number=MI0003649;Name=hsa-mir-634  
Total reads = 0



**B) Normal fibroblast miRNA sequencing**  
ID=MI0003671\_1;accession\_number=MI0003671;Name=hsa-mir-548d-2  
Total reads = 0



**C) PPB Case 14 tumor miRNA sequencing**  
ID=MI0003671\_1;accession\_number=MI0003671;Name=hsa-mir-548d-2  
Total reads = 0



**D) PPB Case 14 cell line miRNA sequencing**  
ID=MI0003671\_1;accession\_number=MI0003671;Name=hsa-mir-548d-2  
Total reads = 0



**B) Normal fibroblast miRNA sequencing**  
ID=MI0016690\_1;accession\_number=MI0016690;Name=hsa-mir-548aa-2  
Total reads = 0



**C) PPB Case 14 tumor miRNA sequencing**  
ID=MI0016690\_1;accession\_number=MI0016690;Name=hsa-mir-548aa-2  
Total reads = 0



**D) PPB Case 14 cell line miRNA sequencing**  
ID=MI0016690\_1;accession\_number=MI0016690;Name=hsa-mir-548aa-2  
Total reads = 0



**B) Normal fibroblast miRNA sequencing**  
ID=MI0003650\_1;accession\_number=MI0003650;Name=hsa-mir-635  
Total reads = 0



**C) PPB Case 14 tumor miRNA sequencing**  
ID=MI0003650\_1;accession\_number=MI0003650;Name=hsa-mir-635  
Total reads = 0



**D) PPB Case 14 cell line miRNA sequencing**  
ID=MI0003650\_1;accession\_number=MI0003650;Name=hsa-mir-635  
Total reads = 0



**B) Normal fibroblast miRNA sequencing**  
ID=MI0019114\_1;accession\_number=MI0019114;Name=hsa-mir-4524b  
Total reads = 0



**C) PPB Case 14 tumor miRNA sequencing**  
ID=MI0019114\_1;accession\_number=MI0019114;Name=hsa-mir-4524b  
Total reads = 0



**D) PPB Case 14 cell line miRNA sequencing**  
ID=MI0019114\_1;accession\_number=MI0019114;Name=hsa-mir-4524b  
Total reads = 0



**B) Normal fibroblast miRNA sequencing**  
ID=MI0016891\_1;accession\_number=MI0016891;Name=hsa-mir-4524a  
Total reads = 0



**C) PPB Case 14 tumor miRNA sequencing**  
ID=MI0016891\_1;accession\_number=MI0016891;Name=hsa-mir-4524a  
Total reads = 0



**D) PPB Case 14 cell line miRNA sequencing**  
ID=MI0016891\_1;accession\_number=MI0016891;Name=hsa-mir-4524a  
Total reads = 0





**B) Normal fibroblast miRNA sequencing**  
ID=MI0016079\_1;accession\_number=MI0016079;Name=hsa-mir-3678  
Total reads = 0



**C) PPB Case 14 tumor miRNA sequencing**  
ID=MI0016079\_1;accession\_number=MI0016079;Name=hsa-mir-3678  
Total reads = 0



**D) PPB Case 14 cell line miRNA sequencing**  
ID=MI0016079\_1;accession\_number=MI0016079;Name=hsa-mir-3678  
Total reads = 0



**B) Normal fibroblast miRNA sequencing**  
ID=MI0017376\_1;accession\_number=MI0017376;Name=hsa-mir-4738  
Total reads = 0



**C) PPB Case 14 tumor miRNA sequencing**  
ID=MI0017376\_1;accession\_number=MI0017376;Name=hsa-mir-4738  
Total reads = 0



**D) PPB Case 14 cell line miRNA sequencing**  
ID=MI0017376\_1;accession\_number=MI0017376;Name=hsa-mir-4738  
Total reads = 0



**B) Normal fibroblast miRNA sequencing**  
ID=MI0003651\_1;accession\_number=MI0003651;Name=hsa-mir-636  
Total reads = 0



**C) PPB Case 14 tumor miRNA sequencing**  
ID=MI0003651\_1;accession\_number=MI0003651;Name=hsa-mir-636  
Total reads = 0



**D) PPB Case 14 cell line miRNA sequencing**  
ID=MI0003651\_1;accession\_number=MI0003651;Name=hsa-mir-636  
Total reads = 0



**B) Normal fibroblast miRNA sequencing**  
ID=MI0015845\_1;accession\_number=MI0015845;Name=hsa-mir-4316  
Total reads = 0



**C) PPB Case 14 tumor miRNA sequencing**  
ID=MI0015845\_1;accession\_number=MI0015845;Name=hsa-mir-4316  
Total reads = 0



**D) PPB Case 14 cell line miRNA sequencing**  
ID=MI0015845\_1;accession\_number=MI0015845;Name=hsa-mir-4316  
Total reads = 0



**B) Normal fibroblast miRNA sequencing**  
ID=MI0017377\_1;accession\_number=MI0017377;Name=hsa-mir-4739  
Total reads = 0



**C) PPB Case 14 tumor miRNA sequencing**  
ID=MI0017377\_1;accession\_number=MI0017377;Name=hsa-mir-4739  
Total reads = 0



**D) PPB Case 14 cell line miRNA sequencing**  
ID=MI0017377\_1;accession\_number=MI0017377;Name=hsa-mir-4739  
Total reads = 0



**B) Normal fibroblast miRNA sequencing**  
ID=MI0016748\_1;accession\_number=MI0016748;Name=hsa-mir-1268b  
Total reads = 0



**C) PPB Case 14 tumor miRNA sequencing**  
ID=MI0016748\_1;accession\_number=MI0016748;Name=hsa-mir-1268b  
Total reads = 0



**D) PPB Case 14 cell line miRNA sequencing**  
ID=MI0016748\_1;accession\_number=MI0016748;Name=hsa-mir-1268b  
Total reads = 0



**B) Normal fibroblast miRNA sequencing**  
ID=MI0017367\_1;accession\_number=MI0017367;Name=hsa-mir-4730  
Total reads = 0



**C) PPB Case 14 tumor miRNA sequencing**  
ID=MI0017367\_1;accession\_number=MI0017367;Name=hsa-mir-4730  
Total reads = 0



**D) PPB Case 14 cell line miRNA sequencing**  
ID=MI0017367\_1;accession\_number=MI0017367;Name=hsa-mir-4730  
Total reads = 0



**B) Normal fibroblast miRNA sequencing**  
ID=MI0003681\_1;accession\_number=MI0003681;Name=hsa-mir-657  
Total reads = 0



**C) PPB Case 14 tumor miRNA sequencing**  
ID=MI0003681\_1;accession\_number=MI0003681;Name=hsa-mir-657  
Total reads = 0



**D) PPB Case 14 cell line miRNA sequencing**  
ID=MI0003681\_1;accession\_number=MI0003681;Name=hsa-mir-657  
Total reads = 0





**B) Normal fibroblast miRNA sequencing**  
ID=MI0006385\_1;accession\_number=MI0006385;Name=hsa-mir-1250  
Total reads = 0



**C) PPB Case 14 tumor miRNA sequencing**  
ID=MI0006385\_1;accession\_number=MI0006385;Name=hsa-mir-1250  
Total reads = 0



**D) PPB Case 14 cell line miRNA sequencing**  
ID=MI0006385\_1;accession\_number=MI0006385;Name=hsa-mir-1250  
Total reads = 0



**B) Normal fibroblast miRNA sequencing**  
ID=MI0017378\_1;accession\_number=MI0017378;Name=hsa-mir-4740  
Total reads = 0



**C) PPB Case 14 tumor miRNA sequencing**  
ID=MI0017378\_1;accession\_number=MI0017378;Name=hsa-mir-4740  
Total reads = 0



**D) PPB Case 14 cell line miRNA sequencing**  
ID=MI0017378\_1;accession\_number=MI0017378;Name=hsa-mir-4740  
Total reads = 0



**B) Normal fibroblast miRNA sequencing**  
ID=MI0014229\_1;accession\_number=MI0014229;Name=hsa-mir-3186  
Total reads = 0



**C) PPB Case 14 tumor miRNA sequencing**  
ID=MI0014229\_1;accession\_number=MI0014229;Name=hsa-mir-3186  
Total reads = 5

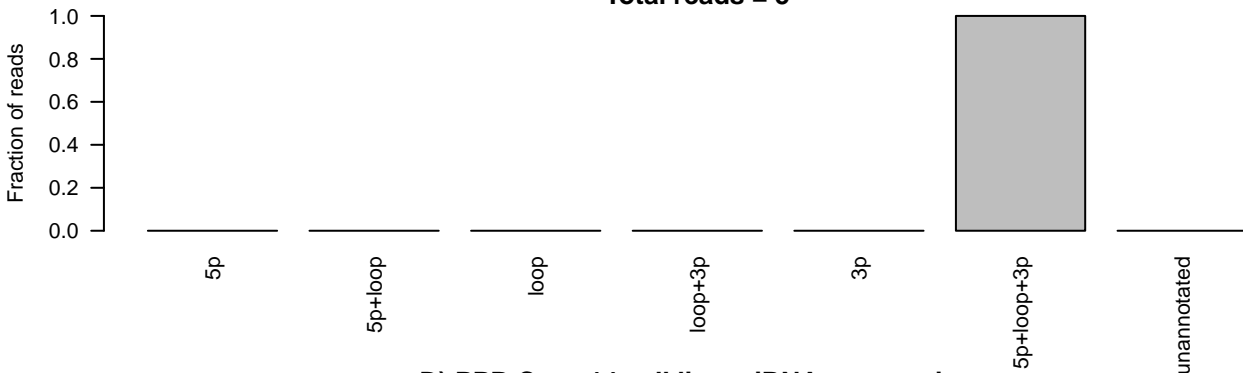

**D) PPB Case 14 cell line miRNA sequencing**  
ID=MI0014229\_1;accession\_number=MI0014229;Name=hsa-mir-3186  
Total reads = 0



**B) Normal fibroblast miRNA sequencing**  
ID=MI0016892\_1;accession\_number=MI0016892;Name=hsa-mir-4525  
Total reads = 0



**C) PPB Case 14 tumor miRNA sequencing**  
ID=MI0016892\_1;accession\_number=MI0016892;Name=hsa-mir-4525  
Total reads = 0



**D) PPB Case 14 cell line miRNA sequencing**  
ID=MI0016892\_1;accession\_number=MI0016892;Name=hsa-mir-4525  
Total reads = 0



**B) Normal fibroblast miRNA sequencing**  
ID=MI0022553\_1;accession\_number=MI0022553;Name=hsa-mir-6718  
Total reads = 0



**C) PPB Case 14 tumor miRNA sequencing**  
ID=MI0022553\_1;accession\_number=MI0022553;Name=hsa-mir-6718  
Total reads = 0



**D) PPB Case 14 cell line miRNA sequencing**  
ID=MI0022553\_1;accession\_number=MI0022553;Name=hsa-mir-6718  
Total reads = 0



**B) Normal fibroblast miRNA sequencing**  
ID=MI0016994\_1;accession\_number=MI0016994;Name=hsa-mir-3976  
Total reads = 0



**C) PPB Case 14 tumor miRNA sequencing**  
ID=MI0016994\_1;accession\_number=MI0016994;Name=hsa-mir-3976  
Total reads = 0



**D) PPB Case 14 cell line miRNA sequencing**  
ID=MI0016994\_1;accession\_number=MI0016994;Name=hsa-mir-3976  
Total reads = 0



**B) Normal fibroblast miRNA sequencing**  
ID=MI0015850\_1;accession\_number=MI0015850;Name=hsa-mir-4317  
Total reads = 0



**C) PPB Case 14 tumor miRNA sequencing**  
ID=MI0015850\_1;accession\_number=MI0015850;Name=hsa-mir-4317  
Total reads = 0



**D) PPB Case 14 cell line miRNA sequencing**  
ID=MI0015850\_1;accession\_number=MI0015850;Name=hsa-mir-4317  
Total reads = 0



**B) Normal fibroblast miRNA sequencing**  
ID=MI0018169\_1;accession\_number=MI0018169;Name=hsa-mir-5190  
Total reads = 0



**C) PPB Case 14 tumor miRNA sequencing**  
ID=MI0018169\_1;accession\_number=MI0018169;Name=hsa-mir-5190  
Total reads = 0



**D) PPB Case 14 cell line miRNA sequencing**  
ID=MI0018169\_1;accession\_number=MI0018169;Name=hsa-mir-5190  
Total reads = 0





**B) Normal fibroblast miRNA sequencing**  
ID=MI0016893\_1;accession\_number=MI0016893;Name=hsa-mir-4526  
Total reads = 0



**C) PPB Case 14 tumor miRNA sequencing**  
ID=MI0016893\_1;accession\_number=MI0016893;Name=hsa-mir-4526  
Total reads = 0



**D) PPB Case 14 cell line miRNA sequencing**  
ID=MI0016893\_1;accession\_number=MI0016893;Name=hsa-mir-4526  
Total reads = 0



**B) Normal fibroblast miRNA sequencing**  
ID=MI0014230\_1;accession\_number=MI0014230;Name=hsa-mir-3156-2  
Total reads = 0



**C) PPB Case 14 tumor miRNA sequencing**  
ID=MI0014230\_1;accession\_number=MI0014230;Name=hsa-mir-3156-2  
Total reads = 0



**D) PPB Case 14 cell line miRNA sequencing**  
ID=MI0014230\_1;accession\_number=MI0014230;Name=hsa-mir-3156-2  
Total reads = 0



**B) Normal fibroblast miRNA sequencing**  
ID=MI0000450\_1;accession\_number=MI0000450;Name=hsa-mir-133a-1  
Total reads = 0



**C) PPB Case 14 tumor miRNA sequencing**  
ID=MI0000450\_1;accession\_number=MI0000450;Name=hsa-mir-133a-1  
Total reads = 4

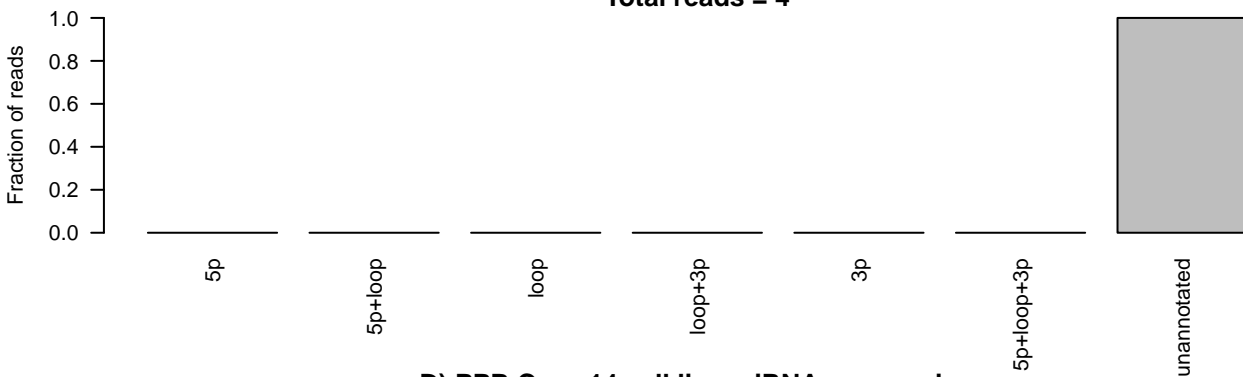

**D) PPB Case 14 cell line miRNA sequencing**  
ID=MI0000450\_1;accession\_number=MI0000450;Name=hsa-mir-133a-1  
Total reads = 0



**B) Normal fibroblast miRNA sequencing**  
ID=MI0000437\_1;accession\_number=MI0000437;Name=hsa-mir-1-2  
Total reads = 0



**C) PPB Case 14 tumor miRNA sequencing**  
ID=MI0000437\_1;accession\_number=MI0000437;Name=hsa-mir-1-2  
Total reads = 0



**D) PPB Case 14 cell line miRNA sequencing**  
ID=MI0000437\_1;accession\_number=MI0000437;Name=hsa-mir-1-2  
Total reads = 1

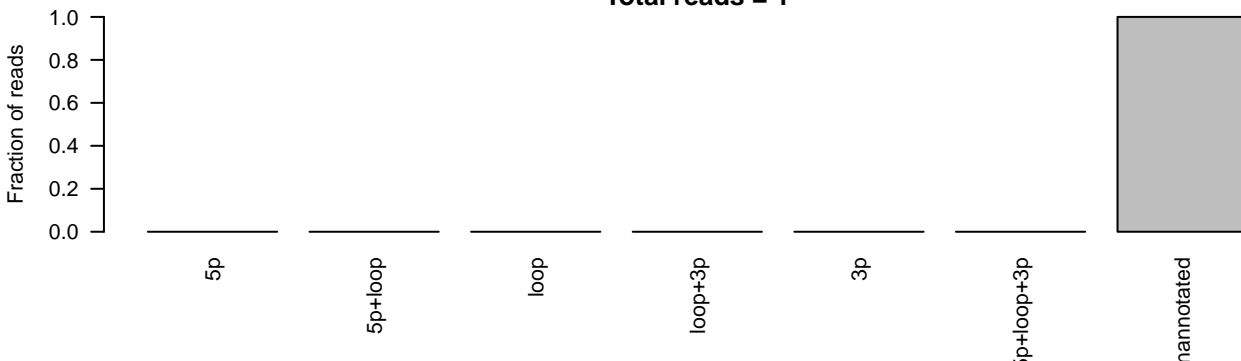

**B) Normal fibroblast miRNA sequencing**  
ID=MI0017379\_1;accession\_number=MI0017379;Name=hsa-mir-4741  
Total reads = 0



**C) PPB Case 14 tumor miRNA sequencing**  
ID=MI0017379\_1;accession\_number=MI0017379;Name=hsa-mir-4741  
Total reads = 0



**D) PPB Case 14 cell line miRNA sequencing**  
ID=MI0017379\_1;accession\_number=MI0017379;Name=hsa-mir-4741  
Total reads = 0



**B) Normal fibroblast miRNA sequencing**  
ID=MI0006418\_1;accession\_number=MI0006418;Name=hsa-mir-302f  
Total reads = 0



**C) PPB Case 14 tumor miRNA sequencing**  
ID=MI0006418\_1;accession\_number=MI0006418;Name=hsa-mir-302f  
Total reads = 0



**D) PPB Case 14 cell line miRNA sequencing**  
ID=MI0006418\_1;accession\_number=MI0006418;Name=hsa-mir-302f  
Total reads = 0



**B) Normal fibroblast miRNA sequencing**  
ID=MI0016993\_1;accession\_number=MI0016993;Name=hsa-mir-3975  
Total reads = 0



**C) PPB Case 14 tumor miRNA sequencing**  
ID=MI0016993\_1;accession\_number=MI0016993;Name=hsa-mir-3975  
Total reads = 0



**D) PPB Case 14 cell line miRNA sequencing**  
ID=MI0016993\_1;accession\_number=MI0016993;Name=hsa-mir-3975  
Total reads = 0



**B) Normal fibroblast miRNA sequencing**  
ID=MI0000274\_1;accession\_number=MI0000274;Name=hsa-mir-187  
Total reads = 0



**C) PPB Case 14 tumor miRNA sequencing**  
ID=MI0000274\_1;accession\_number=MI0000274;Name=hsa-mir-187  
Total reads = 0



**D) PPB Case 14 cell line miRNA sequencing**  
ID=MI0000274\_1;accession\_number=MI0000274;Name=hsa-mir-187  
Total reads = 0





**B) Normal fibroblast miRNA sequencing**  
ID=MI0016439\_1;accession\_number=MI0016439;Name=hsa-mir-3929  
Total reads = 0



**C) PPB Case 14 tumor miRNA sequencing**  
ID=MI0016439\_1;accession\_number=MI0016439;Name=hsa-mir-3929  
Total reads = 0



**D) PPB Case 14 cell line miRNA sequencing**  
ID=MI0016439\_1;accession\_number=MI0016439;Name=hsa-mir-3929  
Total reads = 0



**B) Normal fibroblast miRNA sequencing**  
ID=MI0015847\_1;accession\_number=MI0015847;Name=hsa-mir-4318  
Total reads = 0



**C) PPB Case 14 tumor miRNA sequencing**  
ID=MI0015847\_1;accession\_number=MI0015847;Name=hsa-mir-4318  
Total reads = 0



**D) PPB Case 14 cell line miRNA sequencing**  
ID=MI0015847\_1;accession\_number=MI0015847;Name=hsa-mir-4318  
Total reads = 0



**B) Normal fibroblast miRNA sequencing**  
ID=MI0005716\_1;accession\_number=MI0005716;Name=hsa-mir-924  
Total reads = 0



**C) PPB Case 14 tumor miRNA sequencing**  
ID=MI0005716\_1;accession\_number=MI0005716;Name=hsa-mir-924  
Total reads = 0



**D) PPB Case 14 cell line miRNA sequencing**  
ID=MI0005716\_1;accession\_number=MI0005716;Name=hsa-mir-924  
Total reads = 0



**B) Normal fibroblast miRNA sequencing**  
ID=MI0019140\_1;accession\_number=MI0019140;Name=hsa-mir-5583-2  
Total reads = 0



**C) PPB Case 14 tumor miRNA sequencing**  
ID=MI0019140\_1;accession\_number=MI0019140;Name=hsa-mir-5583-2  
Total reads = 0



**D) PPB Case 14 cell line miRNA sequencing**  
ID=MI0019140\_1;accession\_number=MI0019140;Name=hsa-mir-5583-2  
Total reads = 0



**B) Normal fibroblast miRNA sequencing**  
ID=MI0019139\_1;accession\_number=MI0019139;Name=hsa-mir-5583-1  
Total reads = 0



**C) PPB Case 14 tumor miRNA sequencing**  
ID=MI0019139\_1;accession\_number=MI0019139;Name=hsa-mir-5583-1  
Total reads = 0



**D) PPB Case 14 cell line miRNA sequencing**  
ID=MI0019139\_1;accession\_number=MI0019139;Name=hsa-mir-5583-1  
Total reads = 0



**B) Normal fibroblast miRNA sequencing**  
ID=MI0015848\_1;accession\_number=MI0015848;Name=hsa-mir-4319  
Total reads = 0



**C) PPB Case 14 tumor miRNA sequencing**  
ID=MI0015848\_1;accession\_number=MI0015848;Name=hsa-mir-4319  
Total reads = 0



**D) PPB Case 14 cell line miRNA sequencing**  
ID=MI0015848\_1;accession\_number=MI0015848;Name=hsa-mir-4319  
Total reads = 0



**B) Normal fibroblast miRNA sequencing**  
ID=MI0016894\_1;accession\_number=MI0016894;Name=hsa-mir-4527  
Total reads = 0



**C) PPB Case 14 tumor miRNA sequencing**  
ID=MI0016894\_1;accession\_number=MI0016894;Name=hsa-mir-4527  
Total reads = 0



**D) PPB Case 14 cell line miRNA sequencing**  
ID=MI0016894\_1;accession\_number=MI0016894;Name=hsa-mir-4527  
Total reads = 0



**B) Normal fibroblast miRNA sequencing**  
ID=MI0017381\_1;accession\_number=MI0017381;Name=hsa-mir-4743  
Total reads = 0



**C) PPB Case 14 tumor miRNA sequencing**  
ID=MI0017381\_1;accession\_number=MI0017381;Name=hsa-mir-4743  
Total reads = 0



**D) PPB Case 14 cell line miRNA sequencing**  
ID=MI0017381\_1;accession\_number=MI0017381;Name=hsa-mir-4743  
Total reads = 0





**B) Normal fibroblast miRNA sequencing**  
ID=MI0017382\_1;accession\_number=MI0017382;Name=hsa-mir-4744  
Total reads = 0



**C) PPB Case 14 tumor miRNA sequencing**  
ID=MI0017382\_1;accession\_number=MI0017382;Name=hsa-mir-4744  
Total reads = 0



**D) PPB Case 14 cell line miRNA sequencing**  
ID=MI0017382\_1;accession\_number=MI0017382;Name=hsa-mir-4744  
Total reads = 0



**B) Normal fibroblast miRNA sequencing**  
ID=MI0007260\_1;accession\_number=MI0007260;Name=hsa-mir-1539  
Total reads = 0



**C) PPB Case 14 tumor miRNA sequencing**  
ID=MI0007260\_1;accession\_number=MI0007260;Name=hsa-mir-1539  
Total reads = 0



**D) PPB Case 14 cell line miRNA sequencing**  
ID=MI0007260\_1;accession\_number=MI0007260;Name=hsa-mir-1539  
Total reads = 0



**B) Normal fibroblast miRNA sequencing**  
ID=MI0015849\_1;accession\_number=MI0015849;Name=hsa-mir-4320  
Total reads = 0



**C) PPB Case 14 tumor miRNA sequencing**  
ID=MI0015849\_1;accession\_number=MI0015849;Name=hsa-mir-4320  
Total reads = 0



**D) PPB Case 14 cell line miRNA sequencing**  
ID=MI0015849\_1;accession\_number=MI0015849;Name=hsa-mir-4320  
Total reads = 0



**B) Normal fibroblast miRNA sequencing**  
ID=MI0016895\_1;accession\_number=MI0016895;Name=hsa-mir-4528  
Total reads = 0



**C) PPB Case 14 tumor miRNA sequencing**  
ID=MI0016895\_1;accession\_number=MI0016895;Name=hsa-mir-4528  
Total reads = 0



**D) PPB Case 14 cell line miRNA sequencing**  
ID=MI0016895\_1;accession\_number=MI0016895;Name=hsa-mir-4528  
Total reads = 0



**B) Normal fibroblast miRNA sequencing**  
ID=MI0016896\_1;accession\_number=MI0016896;Name=hsa-mir-4529  
Total reads = 0



**C) PPB Case 14 tumor miRNA sequencing**  
ID=MI0016896\_1;accession\_number=MI0016896;Name=hsa-mir-4529  
Total reads = 0



**D) PPB Case 14 cell line miRNA sequencing**  
ID=MI0016896\_1;accession\_number=MI0016896;Name=hsa-mir-4529  
Total reads = 0



**B) Normal fibroblast miRNA sequencing**  
ID=MI0000442\_1;accession\_number=MI0000442;Name=hsa-mir-122  
Total reads = 0



**C) PPB Case 14 tumor miRNA sequencing**  
ID=MI0000442\_1;accession\_number=MI0000442;Name=hsa-mir-122  
Total reads = 0



**D) PPB Case 14 cell line miRNA sequencing**  
ID=MI0000442\_1;accession\_number=MI0000442;Name=hsa-mir-122  
Total reads = 0



**B) Normal fibroblast miRNA sequencing**  
ID=MI0017383\_1;accession\_number=MI0017383;Name=hsa-mir-3591  
Total reads = 0



**C) PPB Case 14 tumor miRNA sequencing**  
ID=MI0017383\_1;accession\_number=MI0017383;Name=hsa-mir-3591  
Total reads = 0



**D) PPB Case 14 cell line miRNA sequencing**  
ID=MI0017383\_1;accession\_number=MI0017383;Name=hsa-mir-3591  
Total reads = 0



**B) Normal fibroblast miRNA sequencing**  
ID=MI0017879\_1;accession\_number=MI0017879;Name=hsa-mir-5011  
Total reads = 0



**C) PPB Case 14 tumor miRNA sequencing**  
ID=MI0017879\_1;accession\_number=MI0017879;Name=hsa-mir-5011  
Total reads = 0



**D) PPB Case 14 cell line miRNA sequencing**  
ID=MI0017879\_1;accession\_number=MI0017879;Name=hsa-mir-5011  
Total reads = 0





**B) Normal fibroblast miRNA sequencing**  
ID=MI0019152\_1;accession\_number=MI0019152;Name=hsa-mir-548av  
Total reads = 0



**C) PPB Case 14 tumor miRNA sequencing**  
ID=MI0019152\_1;accession\_number=MI0019152;Name=hsa-mir-548av  
Total reads = 0



**D) PPB Case 14 cell line miRNA sequencing**  
ID=MI0019152\_1;accession\_number=MI0019152;Name=hsa-mir-548av  
Total reads = 0



**B) Normal fibroblast miRNA sequencing**  
ID=MI0015979\_1;accession\_number=MI0015979;Name=hsa-mir-1302-10  
Total reads = 0



**C) PPB Case 14 tumor miRNA sequencing**  
ID=MI0015979\_1;accession\_number=MI0015979;Name=hsa-mir-1302-10  
Total reads = 0



**D) PPB Case 14 cell line miRNA sequencing**  
ID=MI0015979\_1;accession\_number=MI0015979;Name=hsa-mir-1302-10  
Total reads = 0



**B) Normal fibroblast miRNA sequencing**  
ID=MI0017384\_1;accession\_number=MI0017384;Name=hsa-mir-4745  
Total reads = 0



**C) PPB Case 14 tumor miRNA sequencing**  
ID=MI0017384\_1;accession\_number=MI0017384;Name=hsa-mir-4745  
Total reads = 1



**D) PPB Case 14 cell line miRNA sequencing**  
ID=MI0017384\_1;accession\_number=MI0017384;Name=hsa-mir-4745  
Total reads = 0



**B) Normal fibroblast miRNA sequencing**  
ID=MI0014231\_1;accession\_number=MI0014231;Name=hsa-mir-3187  
Total reads = 0



**C) PPB Case 14 tumor miRNA sequencing**  
ID=MI0014231\_1;accession\_number=MI0014231;Name=hsa-mir-3187  
Total reads = 0



**D) PPB Case 14 cell line miRNA sequencing**  
ID=MI0014231\_1;accession\_number=MI0014231;Name=hsa-mir-3187  
Total reads = 0



**B) Normal fibroblast miRNA sequencing**  
ID=MI0008330\_1;accession\_number=MI0008330;Name=hsa-mir-1909  
Total reads = 0



**C) PPB Case 14 tumor miRNA sequencing**  
ID=MI0008330\_1;accession\_number=MI0008330;Name=hsa-mir-1909  
Total reads = 0



**D) PPB Case 14 cell line miRNA sequencing**  
ID=MI0008330\_1;accession\_number=MI0008330;Name=hsa-mir-1909  
Total reads = 0



**B) Normal fibroblast miRNA sequencing**  
ID=MI0006316\_1;accession\_number=MI0006316;Name=hsa-mir-1227  
Total reads = 0



**C) PPB Case 14 tumor miRNA sequencing**  
ID=MI0006316\_1;accession\_number=MI0006316;Name=hsa-mir-1227  
Total reads = 0



**D) PPB Case 14 cell line miRNA sequencing**  
ID=MI0006316\_1;accession\_number=MI0006316;Name=hsa-mir-1227  
Total reads = 0



**B) Normal fibroblast miRNA sequencing**  
ID=MI0015852\_1;accession\_number=MI0015852;Name=hsa-mir-4321  
Total reads = 0



**C) PPB Case 14 tumor miRNA sequencing**  
ID=MI0015852\_1;accession\_number=MI0015852;Name=hsa-mir-4321  
Total reads = 0



**D) PPB Case 14 cell line miRNA sequencing**  
ID=MI0015852\_1;accession\_number=MI0015852;Name=hsa-mir-4321  
Total reads = 0



**B) Normal fibroblast miRNA sequencing**  
ID=MI0003652\_1;accession\_number=MI0003652;Name=hsa-mir-637  
Total reads = 0



**C) PPB Case 14 tumor miRNA sequencing**  
ID=MI0003652\_1;accession\_number=MI0003652;Name=hsa-mir-637  
Total reads = 0



**D) PPB Case 14 cell line miRNA sequencing**  
ID=MI0003652\_1;accession\_number=MI0003652;Name=hsa-mir-637  
Total reads = 0





**B) Normal fibroblast miRNA sequencing**  
ID=MI0017385\_1;accession\_number=MI0017385;Name=hsa-mir-4746  
Total reads = 0



**C) PPB Case 14 tumor miRNA sequencing**  
ID=MI0017385\_1;accession\_number=MI0017385;Name=hsa-mir-4746  
Total reads = 0



**D) PPB Case 14 cell line miRNA sequencing**  
ID=MI0017385\_1;accession\_number=MI0017385;Name=hsa-mir-4746  
Total reads = 0



**B) Normal fibroblast miRNA sequencing**  
ID=MI0017386\_1;accession\_number=MI0017386;Name=hsa-mir-4747  
Total reads = 0



**C) PPB Case 14 tumor miRNA sequencing**  
ID=MI0017386\_1;accession\_number=MI0017386;Name=hsa-mir-4747  
Total reads = 0



**D) PPB Case 14 cell line miRNA sequencing**  
ID=MI0017386\_1;accession\_number=MI0017386;Name=hsa-mir-4747  
Total reads = 0



**B) Normal fibroblast miRNA sequencing**  
ID=MI0016597\_1;accession\_number=MI0016597;Name=hsa-mir-3940  
Total reads = 0



**C) PPB Case 14 tumor miRNA sequencing**  
ID=MI0016597\_1;accession\_number=MI0016597;Name=hsa-mir-3940  
Total reads = 0



**D) PPB Case 14 cell line miRNA sequencing**  
ID=MI0016597\_1;accession\_number=MI0016597;Name=hsa-mir-3940  
Total reads = 0



**B) Normal fibroblast miRNA sequencing**  
ID=MI0017865\_1;accession\_number=MI0017865;Name=hsa-mir-4999  
Total reads = 0



**C) PPB Case 14 tumor miRNA sequencing**  
ID=MI0017865\_1;accession\_number=MI0017865;Name=hsa-mir-4999  
Total reads = 0



**D) PPB Case 14 cell line miRNA sequencing**  
ID=MI0017865\_1;accession\_number=MI0017865;Name=hsa-mir-4999  
Total reads = 0



**B) Normal fibroblast miRNA sequencing**  
ID=MI0019148\_1;accession\_number=MI0019148;Name=hsa-mir-5589  
Total reads = 0



**C) PPB Case 14 tumor miRNA sequencing**  
ID=MI0019148\_1;accession\_number=MI0019148;Name=hsa-mir-5589  
Total reads = 0



**D) PPB Case 14 cell line miRNA sequencing**  
ID=MI0019148\_1;accession\_number=MI0019148;Name=hsa-mir-5589  
Total reads = 0



**B) Normal fibroblast miRNA sequencing**  
ID=MI0015851\_1;accession\_number=MI0015851;Name=hsa-mir-4322  
Total reads = 0



**C) PPB Case 14 tumor miRNA sequencing**  
ID=MI0015851\_1;accession\_number=MI0015851;Name=hsa-mir-4322  
Total reads = 0



**D) PPB Case 14 cell line miRNA sequencing**  
ID=MI0015851\_1;accession\_number=MI0015851;Name=hsa-mir-4322  
Total reads = 0



**B) Normal fibroblast miRNA sequencing**  
ID=MI0006274\_1;accession\_number=MI0006274;Name=hsa-mir-1181  
Total reads = 0



**C) PPB Case 14 tumor miRNA sequencing**  
ID=MI0006274\_1;accession\_number=MI0006274;Name=hsa-mir-1181  
Total reads = 0



**D) PPB Case 14 cell line miRNA sequencing**  
ID=MI0006274\_1;accession\_number=MI0006274;Name=hsa-mir-1181  
Total reads = 0



**B) Normal fibroblast miRNA sequencing**  
ID=MI0006328\_1;accession\_number=MI0006328;Name=hsa-mir-1238  
Total reads = 0



**C) PPB Case 14 tumor miRNA sequencing**  
ID=MI0006328\_1;accession\_number=MI0006328;Name=hsa-mir-1238  
Total reads = 0



**D) PPB Case 14 cell line miRNA sequencing**  
ID=MI0006328\_1;accession\_number=MI0006328;Name=hsa-mir-1238  
Total reads = 0





**B) Normal fibroblast miRNA sequencing**  
ID=MI0003653\_1;accession\_number=MI0003653;Name=hsa-mir-638  
Total reads = 0



**C) PPB Case 14 tumor miRNA sequencing**  
ID=MI0003653\_1;accession\_number=MI0003653;Name=hsa-mir-638  
Total reads = 0



**D) PPB Case 14 cell line miRNA sequencing**  
ID=MI0003653\_1;accession\_number=MI0003653;Name=hsa-mir-638  
Total reads = 0



**B) Normal fibroblast miRNA sequencing**  
ID=MI0017387\_1;accession\_number=MI0017387;Name=hsa-mir-4748  
Total reads = 0



**C) PPB Case 14 tumor miRNA sequencing**  
ID=MI0017387\_1;accession\_number=MI0017387;Name=hsa-mir-4748  
Total reads = 0



**D) PPB Case 14 cell line miRNA sequencing**  
ID=MI0017387\_1;accession\_number=MI0017387;Name=hsa-mir-4748  
Total reads = 0



**B) Normal fibroblast miRNA sequencing**  
ID=MI0019285\_1;accession\_number=MI0019285;Name=hsa-mir-5684  
Total reads = 0



**C) PPB Case 14 tumor miRNA sequencing**  
ID=MI0019285\_1;accession\_number=MI0019285;Name=hsa-mir-5684  
Total reads = 0



**D) PPB Case 14 cell line miRNA sequencing**  
ID=MI0019285\_1;accession\_number=MI0019285;Name=hsa-mir-5684  
Total reads = 0



**B) Normal fibroblast miRNA sequencing**  
ID=MI0019302\_1;accession\_number=MI0019302;Name=hsa-mir-5695  
Total reads = 0



**C) PPB Case 14 tumor miRNA sequencing**  
ID=MI0019302\_1;accession\_number=MI0019302;Name=hsa-mir-5695  
Total reads = 0



**D) PPB Case 14 cell line miRNA sequencing**  
ID=MI0019302\_1;accession\_number=MI0019302;Name=hsa-mir-5695  
Total reads = 0



**B) Normal fibroblast miRNA sequencing**  
ID=MI0022227\_1;accession\_number=MI0022227;Name=hsa-mir-6515  
Total reads = 0



**C) PPB Case 14 tumor miRNA sequencing**  
ID=MI0022227\_1;accession\_number=MI0022227;Name=hsa-mir-6515  
Total reads = 1



**D) PPB Case 14 cell line miRNA sequencing**  
ID=MI0022227\_1;accession\_number=MI0022227;Name=hsa-mir-6515  
Total reads = 0



**B) Normal fibroblast miRNA sequencing**  
ID=MI0003654\_1;accession\_number=MI0003654;Name=hsa-mir-639  
Total reads = 0



**C) PPB Case 14 tumor miRNA sequencing**  
ID=MI0003654\_1;accession\_number=MI0003654;Name=hsa-mir-639  
Total reads = 0



**D) PPB Case 14 cell line miRNA sequencing**  
ID=MI0003654\_1;accession\_number=MI0003654;Name=hsa-mir-639  
Total reads = 0



**B) Normal fibroblast miRNA sequencing**  
ID=MI0007075\_1;accession\_number=MI0007075;Name=hsa-mir-1470  
Total reads = 0



**C) PPB Case 14 tumor miRNA sequencing**  
ID=MI0007075\_1;accession\_number=MI0007075;Name=hsa-mir-1470  
Total reads = 0



**D) PPB Case 14 cell line miRNA sequencing**  
ID=MI0007075\_1;accession\_number=MI0007075;Name=hsa-mir-1470  
Total reads = 0



**B) Normal fibroblast miRNA sequencing**  
ID=MI0014232\_1;accession\_number=MI0014232;Name=hsa-mir-3188  
Total reads = 0



**C) PPB Case 14 tumor miRNA sequencing**  
ID=MI0014232\_1;accession\_number=MI0014232;Name=hsa-mir-3188  
Total reads = 0



**D) PPB Case 14 cell line miRNA sequencing**  
ID=MI0014232\_1;accession\_number=MI0014232;Name=hsa-mir-3188  
Total reads = 0





**B) Normal fibroblast miRNA sequencing**  
ID=MI0014233\_1;accession\_number=MI0014233;Name=hsa-mir-3189  
Total reads = 0



**C) PPB Case 14 tumor miRNA sequencing**  
ID=MI0014233\_1;accession\_number=MI0014233;Name=hsa-mir-3189  
Total reads = 0



**D) PPB Case 14 cell line miRNA sequencing**  
ID=MI0014233\_1;accession\_number=MI0014233;Name=hsa-mir-3189  
Total reads = 0



**B) Normal fibroblast miRNA sequencing**  
ID=MI0003655\_1;accession\_number=MI0003655;Name=hsa-mir-640  
Total reads = 0



**C) PPB Case 14 tumor miRNA sequencing**  
ID=MI0003655\_1;accession\_number=MI0003655;Name=hsa-mir-640  
Total reads = 0



**D) PPB Case 14 cell line miRNA sequencing**  
ID=MI0003655\_1;accession\_number=MI0003655;Name=hsa-mir-640  
Total reads = 0



**B) Normal fibroblast miRNA sequencing**  
ID=MI0006407\_1;accession\_number=MI0006407;Name=hsa-mir-1270-1  
Total reads = 0



**C) PPB Case 14 tumor miRNA sequencing**  
ID=MI0006407\_1;accession\_number=MI0006407;Name=hsa-mir-1270-1  
Total reads = 0



**D) PPB Case 14 cell line miRNA sequencing**  
ID=MI0006407\_1;accession\_number=MI0006407;Name=hsa-mir-1270-1  
Total reads = 0

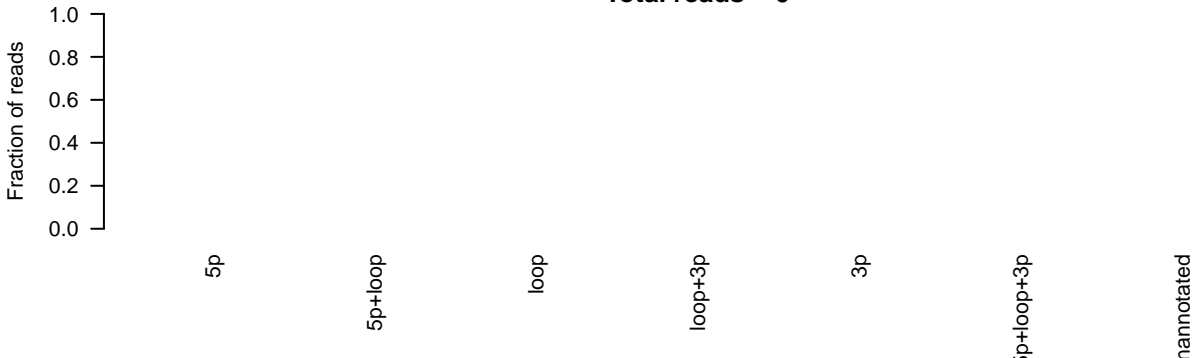

**B) Normal fibroblast miRNA sequencing**  
ID=MI0015976\_1;accession\_number=MI0015976;Name=hsa-mir-1270-2  
Total reads = 0



**C) PPB Case 14 tumor miRNA sequencing**  
ID=MI0015976\_1;accession\_number=MI0015976;Name=hsa-mir-1270-2  
Total reads = 0



**D) PPB Case 14 cell line miRNA sequencing**  
ID=MI0015976\_1;accession\_number=MI0015976;Name=hsa-mir-1270-2  
Total reads = 0



**B) Normal fibroblast miRNA sequencing**  
ID=MI0018175\_1;accession\_number=MI0018175;Name=hsa-mir-5196  
Total reads = 0



**C) PPB Case 14 tumor miRNA sequencing**  
ID=MI0018175\_1;accession\_number=MI0018175;Name=hsa-mir-5196  
Total reads = 0



**D) PPB Case 14 cell line miRNA sequencing**  
ID=MI0018175\_1;accession\_number=MI0018175;Name=hsa-mir-5196  
Total reads = 0



**B) Normal fibroblast miRNA sequencing**  
ID=MI0016897\_1;accession\_number=MI0016897;Name=hsa-mir-4530  
Total reads = 0



**C) PPB Case 14 tumor miRNA sequencing**  
ID=MI0016897\_1;accession\_number=MI0016897;Name=hsa-mir-4530  
Total reads = 0



**D) PPB Case 14 cell line miRNA sequencing**  
ID=MI0016897\_1;accession\_number=MI0016897;Name=hsa-mir-4530  
Total reads = 0



**B) Normal fibroblast miRNA sequencing**  
ID=MI0022554\_1;accession\_number=MI0022554;Name=hsa-mir-6719  
Total reads = 0



**C) PPB Case 14 tumor miRNA sequencing**  
ID=MI0022554\_1;accession\_number=MI0022554;Name=hsa-mir-6719  
Total reads = 0



**D) PPB Case 14 cell line miRNA sequencing**  
ID=MI0022554\_1;accession\_number=MI0022554;Name=hsa-mir-6719  
Total reads = 0



**B) Normal fibroblast miRNA sequencing**  
ID=MI0015853\_1;accession\_number=MI0015853;Name=hsa-mir-4323  
Total reads = 0



**C) PPB Case 14 tumor miRNA sequencing**  
ID=MI0015853\_1;accession\_number=MI0015853;Name=hsa-mir-4323  
Total reads = 0



**D) PPB Case 14 cell line miRNA sequencing**  
ID=MI0015853\_1;accession\_number=MI0015853;Name=hsa-mir-4323  
Total reads = 0





**B) Normal fibroblast miRNA sequencing**  
ID=MI0016898\_1;accession\_number=MI0016898;Name=hsa-mir-4531  
Total reads = 0



**C) PPB Case 14 tumor miRNA sequencing**  
ID=MI0016898\_1;accession\_number=MI0016898;Name=hsa-mir-4531  
Total reads = 0



**D) PPB Case 14 cell line miRNA sequencing**  
ID=MI0016898\_1;accession\_number=MI0016898;Name=hsa-mir-4531  
Total reads = 0



**B) Normal fibroblast miRNA sequencing**  
ID=MI0020365\_1;accession\_number=MI0020365;Name=hsa-mir-6088  
Total reads = 0



**C) PPB Case 14 tumor miRNA sequencing**  
ID=MI0020365\_1;accession\_number=MI0020365;Name=hsa-mir-6088  
Total reads = 0



**D) PPB Case 14 cell line miRNA sequencing**  
ID=MI0020365\_1;accession\_number=MI0020365;Name=hsa-mir-6088  
Total reads = 0



**B) Normal fibroblast miRNA sequencing**  
ID=MI0003657\_1;accession\_number=MI0003657;Name=hsa-mir-642a  
Total reads = 0



**C) PPB Case 14 tumor miRNA sequencing**  
ID=MI0003657\_1;accession\_number=MI0003657;Name=hsa-mir-642a  
Total reads = 0



**D) PPB Case 14 cell line miRNA sequencing**  
ID=MI0003657\_1;accession\_number=MI0003657;Name=hsa-mir-642a  
Total reads = 0



**B) Normal fibroblast miRNA sequencing**  
ID=MI0016685\_1;accession\_number=MI0016685;Name=hsa-mir-642b  
Total reads = 0



**C) PPB Case 14 tumor miRNA sequencing**  
ID=MI0016685\_1;accession\_number=MI0016685;Name=hsa-mir-642b  
Total reads = 0



**D) PPB Case 14 cell line miRNA sequencing**  
ID=MI0016685\_1;accession\_number=MI0016685;Name=hsa-mir-642b  
Total reads = 0



**B) Normal fibroblast miRNA sequencing**  
ID=MI0014234\_1;accession\_number=MI0014234;Name=hsa-mir-320e  
Total reads = 0



**C) PPB Case 14 tumor miRNA sequencing**  
ID=MI0014234\_1;accession\_number=MI0014234;Name=hsa-mir-320e  
Total reads = 0



**D) PPB Case 14 cell line miRNA sequencing**  
ID=MI0014234\_1;accession\_number=MI0014234;Name=hsa-mir-320e  
Total reads = 0



**B) Normal fibroblast miRNA sequencing**  
ID=MI0014235\_1;accession\_number=MI0014235;Name=hsa-mir-3190  
Total reads = 0



**C) PPB Case 14 tumor miRNA sequencing**  
ID=MI0014235\_1;accession\_number=MI0014235;Name=hsa-mir-3190  
Total reads = 0



**D) PPB Case 14 cell line miRNA sequencing**  
ID=MI0014235\_1;accession\_number=MI0014235;Name=hsa-mir-3190  
Total reads = 0



**B) Normal fibroblast miRNA sequencing**  
ID=MI0014236\_1;accession\_number=MI0014236;Name=hsa-mir-3191  
Total reads = 0



**C) PPB Case 14 tumor miRNA sequencing**  
ID=MI0014236\_1;accession\_number=MI0014236;Name=hsa-mir-3191  
Total reads = 0



**D) PPB Case 14 cell line miRNA sequencing**  
ID=MI0014236\_1;accession\_number=MI0014236;Name=hsa-mir-3191  
Total reads = 0



**B) Normal fibroblast miRNA sequencing**  
ID=MI0015854\_1;accession\_number=MI0015854;Name=hsa-mir-4324  
Total reads = 0



**C) PPB Case 14 tumor miRNA sequencing**  
ID=MI0015854\_1;accession\_number=MI0015854;Name=hsa-mir-4324  
Total reads = 0



**D) PPB Case 14 cell line miRNA sequencing**  
ID=MI0015854\_1;accession\_number=MI0015854;Name=hsa-mir-4324  
Total reads = 0





**B) Normal fibroblast miRNA sequencing**  
ID=MI0000479\_1;accession\_number=MI0000479;Name=hsa-mir-150  
Total reads = 0



**C) PPB Case 14 tumor miRNA sequencing**  
ID=MI0000479\_1;accession\_number=MI0000479;Name=hsa-mir-150  
Total reads = 3

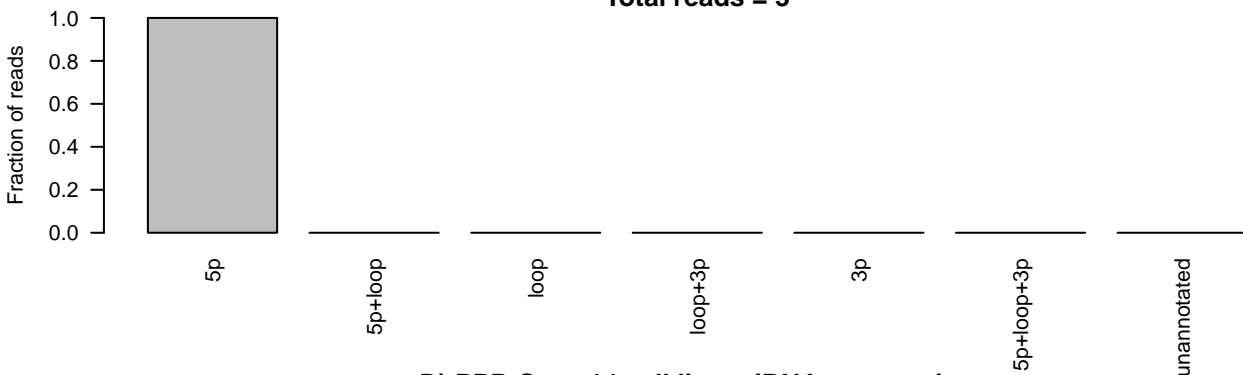

**D) PPB Case 14 cell line miRNA sequencing**  
ID=MI0000479\_1;accession\_number=MI0000479;Name=hsa-mir-150  
Total reads = 0



**B) Normal fibroblast miRNA sequencing**  
ID=MI0017977\_1;accession\_number=MI0017977;Name=hsa-mir-5088  
Total reads = 0



**C) PPB Case 14 tumor miRNA sequencing**  
ID=MI0017977\_1;accession\_number=MI0017977;Name=hsa-mir-5088  
Total reads = 0



**D) PPB Case 14 cell line miRNA sequencing**  
ID=MI0017977\_1;accession\_number=MI0017977;Name=hsa-mir-5088  
Total reads = 0



**B) Normal fibroblast miRNA sequencing**  
ID=MI0017388\_1;accession\_number=MI0017388;Name=hsa-mir-4749  
Total reads = 0



**C) PPB Case 14 tumor miRNA sequencing**  
ID=MI0017388\_1;accession\_number=MI0017388;Name=hsa-mir-4749  
Total reads = 0



**D) PPB Case 14 cell line miRNA sequencing**  
ID=MI0017388\_1;accession\_number=MI0017388;Name=hsa-mir-4749  
Total reads = 0



**B) Normal fibroblast miRNA sequencing**  
ID=MI0017389\_1;accession\_number=MI0017389;Name=hsa-mir-4750  
Total reads = 0



**C) PPB Case 14 tumor miRNA sequencing**  
ID=MI0017389\_1;accession\_number=MI0017389;Name=hsa-mir-4750  
Total reads = 1

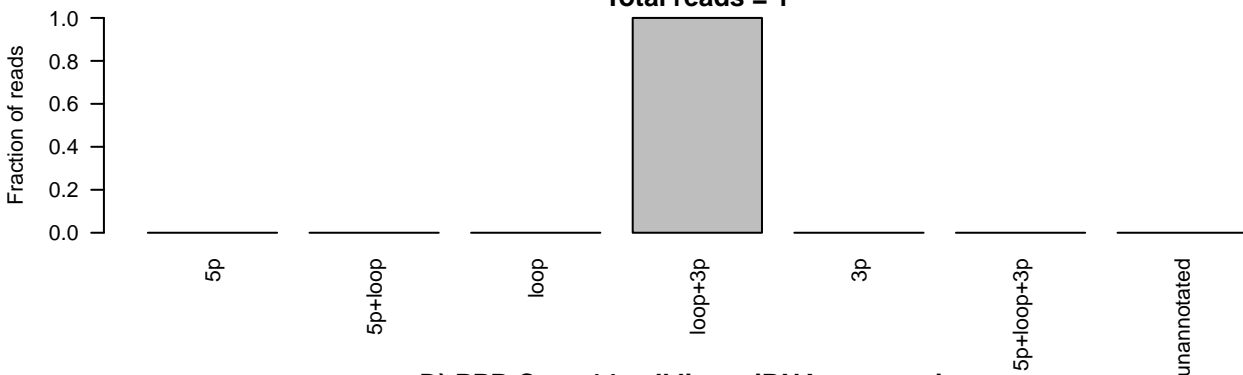

**D) PPB Case 14 cell line miRNA sequencing**  
ID=MI0017389\_1;accession\_number=MI0017389;Name=hsa-mir-4750  
Total reads = 0



**B) Normal fibroblast miRNA sequencing**  
ID=MI0017390\_1;accession\_number=MI0017390;Name=hsa-mir-4751  
Total reads = 0



**C) PPB Case 14 tumor miRNA sequencing**  
ID=MI0017390\_1;accession\_number=MI0017390;Name=hsa-mir-4751  
Total reads = 0



**D) PPB Case 14 cell line miRNA sequencing**  
ID=MI0017390\_1;accession\_number=MI0017390;Name=hsa-mir-4751  
Total reads = 0



**B) Normal fibroblast miRNA sequencing**  
ID=MI0003658\_1;accession\_number=MI0003658;Name=hsa-mir-643  
Total reads = 0



**C) PPB Case 14 tumor miRNA sequencing**  
ID=MI0003658\_1;accession\_number=MI0003658;Name=hsa-mir-643  
Total reads = 0



**D) PPB Case 14 cell line miRNA sequencing**  
ID=MI0003658\_1;accession\_number=MI0003658;Name=hsa-mir-643  
Total reads = 0



**B) Normal fibroblast miRNA sequencing**  
ID=MI0003140\_1;accession\_number=MI0003140;Name=hsa-mir-512-1  
Total reads = 0



**C) PPB Case 14 tumor miRNA sequencing**  
ID=MI0003140\_1;accession\_number=MI0003140;Name=hsa-mir-512-1  
Total reads = 0



**D) PPB Case 14 cell line miRNA sequencing**  
ID=MI0003140\_1;accession\_number=MI0003140;Name=hsa-mir-512-1  
Total reads = 0



**B) Normal fibroblast miRNA sequencing**  
ID=MI0003141\_1;accession\_number=MI0003141;Name=hsa-mir-512-2  
Total reads = 0



**C) PPB Case 14 tumor miRNA sequencing**  
ID=MI0003141\_1;accession\_number=MI0003141;Name=hsa-mir-512-2  
Total reads = 0



**D) PPB Case 14 cell line miRNA sequencing**  
ID=MI0003141\_1;accession\_number=MI0003141;Name=hsa-mir-512-2  
Total reads = 0





**B) Normal fibroblast miRNA sequencing**  
ID=MI0003786\_1;accession\_number=MI0003786;Name=hsa-mir-1323  
Total reads = 0



**C) PPB Case 14 tumor miRNA sequencing**  
ID=MI0003786\_1;accession\_number=MI0003786;Name=hsa-mir-1323  
Total reads = 0



**D) PPB Case 14 cell line miRNA sequencing**  
ID=MI0003786\_1;accession\_number=MI0003786;Name=hsa-mir-1323  
Total reads = 0



**B) Normal fibroblast miRNA sequencing**  
ID=MI0003142\_1;accession\_number=MI0003142;Name=hsa-mir-498  
Total reads = 0



**C) PPB Case 14 tumor miRNA sequencing**  
ID=MI0003142\_1;accession\_number=MI0003142;Name=hsa-mir-498  
Total reads = 0



**D) PPB Case 14 cell line miRNA sequencing**  
ID=MI0003142\_1;accession\_number=MI0003142;Name=hsa-mir-498  
Total reads = 0



**B) Normal fibroblast miRNA sequencing**  
ID=MI0003143\_1;accession\_number=MI0003143;Name=hsa-mir-520e  
Total reads = 0



**C) PPB Case 14 tumor miRNA sequencing**  
ID=MI0003143\_1;accession\_number=MI0003143;Name=hsa-mir-520e  
Total reads = 0



**D) PPB Case 14 cell line miRNA sequencing**  
ID=MI0003143\_1;accession\_number=MI0003143;Name=hsa-mir-520e  
Total reads = 0



**B) Normal fibroblast miRNA sequencing**  
ID=MI0003144\_1;accession\_number=MI0003144;Name=hsa-mir-515-1  
Total reads = 0



**C) PPB Case 14 tumor miRNA sequencing**  
ID=MI0003144\_1;accession\_number=MI0003144;Name=hsa-mir-515-1  
Total reads = 0



**D) PPB Case 14 cell line miRNA sequencing**  
ID=MI0003144\_1;accession\_number=MI0003144;Name=hsa-mir-515-1  
Total reads = 0



**B) Normal fibroblast miRNA sequencing**  
ID=MI0003145\_1;accession\_number=MI0003145;Name=hsa-mir-519e  
Total reads = 0



**C) PPB Case 14 tumor miRNA sequencing**  
ID=MI0003145\_1;accession\_number=MI0003145;Name=hsa-mir-519e  
Total reads = 0



**D) PPB Case 14 cell line miRNA sequencing**  
ID=MI0003145\_1;accession\_number=MI0003145;Name=hsa-mir-519e  
Total reads = 0



**B) Normal fibroblast miRNA sequencing**  
ID=MI0003146\_1;accession\_number=MI0003146;Name=hsa-mir-520f  
Total reads = 0



**C) PPB Case 14 tumor miRNA sequencing**  
ID=MI0003146\_1;accession\_number=MI0003146;Name=hsa-mir-520f  
Total reads = 0



**D) PPB Case 14 cell line miRNA sequencing**  
ID=MI0003146\_1;accession\_number=MI0003146;Name=hsa-mir-520f  
Total reads = 0



**B) Normal fibroblast miRNA sequencing**  
ID=MI0003147\_1;accession\_number=MI0003147;Name=hsa-mir-515-2  
Total reads = 0



**C) PPB Case 14 tumor miRNA sequencing**  
ID=MI0003147\_1;accession\_number=MI0003147;Name=hsa-mir-515-2  
Total reads = 0



**D) PPB Case 14 cell line miRNA sequencing**  
ID=MI0003147\_1;accession\_number=MI0003147;Name=hsa-mir-515-2  
Total reads = 0



**B) Normal fibroblast miRNA sequencing**  
ID=MI0003148\_1;accession\_number=MI0003148;Name=hsa-mir-519c  
Total reads = 0



**C) PPB Case 14 tumor miRNA sequencing**  
ID=MI0003148\_1;accession\_number=MI0003148;Name=hsa-mir-519c  
Total reads = 0



**D) PPB Case 14 cell line miRNA sequencing**  
ID=MI0003148\_1;accession\_number=MI0003148;Name=hsa-mir-519c  
Total reads = 0





**B) Normal fibroblast miRNA sequencing**  
ID=MI0003832\_1;accession\_number=MI0003832;Name=hsa-mir-1283-1  
Total reads = 0



**C) PPB Case 14 tumor miRNA sequencing**  
ID=MI0003832\_1;accession\_number=MI0003832;Name=hsa-mir-1283-1  
Total reads = 0

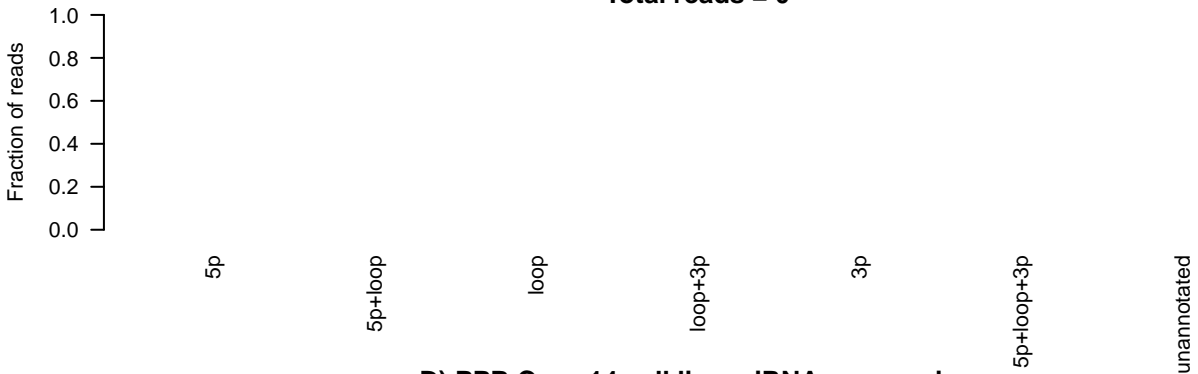

**D) PPB Case 14 cell line miRNA sequencing**  
ID=MI0003832\_1;accession\_number=MI0003832;Name=hsa-mir-1283-1  
Total reads = 0



**B) Normal fibroblast miRNA sequencing**  
ID=MI0003149\_1;accession\_number=MI0003149;Name=hsa-mir-520a  
Total reads = 0



**C) PPB Case 14 tumor miRNA sequencing**  
ID=MI0003149\_1;accession\_number=MI0003149;Name=hsa-mir-520a  
Total reads = 0



**D) PPB Case 14 cell line miRNA sequencing**  
ID=MI0003149\_1;accession\_number=MI0003149;Name=hsa-mir-520a  
Total reads = 0



**B) Normal fibroblast miRNA sequencing**  
ID=MI0003150\_1;accession\_number=MI0003150;Name=hsa-mir-526b  
Total reads = 0



**C) PPB Case 14 tumor miRNA sequencing**  
ID=MI0003150\_1;accession\_number=MI0003150;Name=hsa-mir-526b  
Total reads = 0



**D) PPB Case 14 cell line miRNA sequencing**  
ID=MI0003150\_1;accession\_number=MI0003150;Name=hsa-mir-526b  
Total reads = 0



**B) Normal fibroblast miRNA sequencing**  
ID=MI0003151\_1;accession\_number=MI0003151;Name=hsa-mir-519b  
Total reads = 0



**C) PPB Case 14 tumor miRNA sequencing**  
ID=MI0003151\_1;accession\_number=MI0003151;Name=hsa-mir-519b  
Total reads = 0



**D) PPB Case 14 cell line miRNA sequencing**  
ID=MI0003151\_1;accession\_number=MI0003151;Name=hsa-mir-519b  
Total reads = 0



**B) Normal fibroblast miRNA sequencing**  
ID=MI0003152\_1;accession\_number=MI0003152;Name=hsa-mir-525  
Total reads = 0



**C) PPB Case 14 tumor miRNA sequencing**  
ID=MI0003152\_1;accession\_number=MI0003152;Name=hsa-mir-525  
Total reads = 0



**D) PPB Case 14 cell line miRNA sequencing**  
ID=MI0003152\_1;accession\_number=MI0003152;Name=hsa-mir-525  
Total reads = 0



**B) Normal fibroblast miRNA sequencing**  
ID=MI0003153\_1;accession\_number=MI0003153;Name=hsa-mir-523  
Total reads = 0



**C) PPB Case 14 tumor miRNA sequencing**  
ID=MI0003153\_1;accession\_number=MI0003153;Name=hsa-mir-523  
Total reads = 1



**D) PPB Case 14 cell line miRNA sequencing**  
ID=MI0003153\_1;accession\_number=MI0003153;Name=hsa-mir-523  
Total reads = 0



**B) Normal fibroblast miRNA sequencing**  
ID=MI0003154\_1;accession\_number=MI0003154;Name=hsa-mir-518f  
Total reads = 0



**C) PPB Case 14 tumor miRNA sequencing**  
ID=MI0003154\_1;accession\_number=MI0003154;Name=hsa-mir-518f  
Total reads = 0



**D) PPB Case 14 cell line miRNA sequencing**  
ID=MI0003154\_1;accession\_number=MI0003154;Name=hsa-mir-518f  
Total reads = 0



**B) Normal fibroblast miRNA sequencing**  
ID=MI0003155\_1;accession\_number=MI0003155;Name=hsa-mir-520b  
Total reads = 0



**C) PPB Case 14 tumor miRNA sequencing**  
ID=MI0003155\_1;accession\_number=MI0003155;Name=hsa-mir-520b  
Total reads = 1

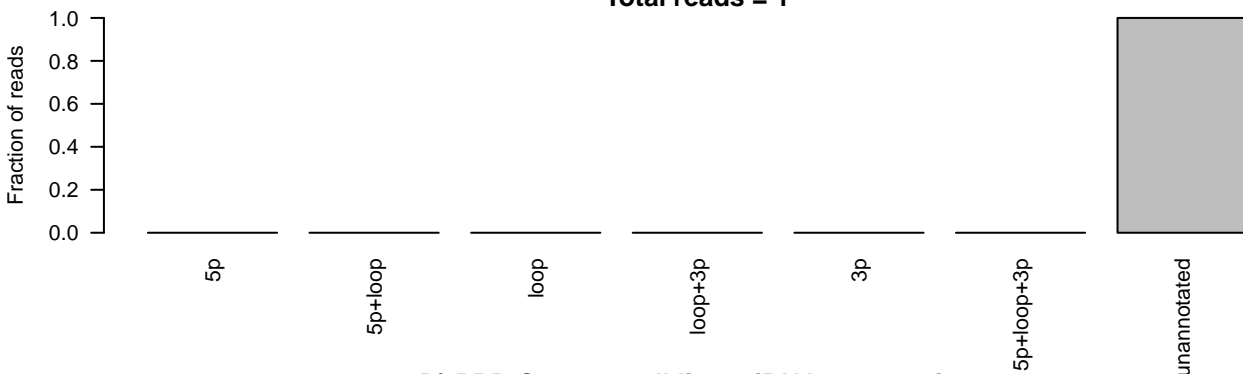

**D) PPB Case 14 cell line miRNA sequencing**  
ID=MI0003155\_1;accession\_number=MI0003155;Name=hsa-mir-520b  
Total reads = 1

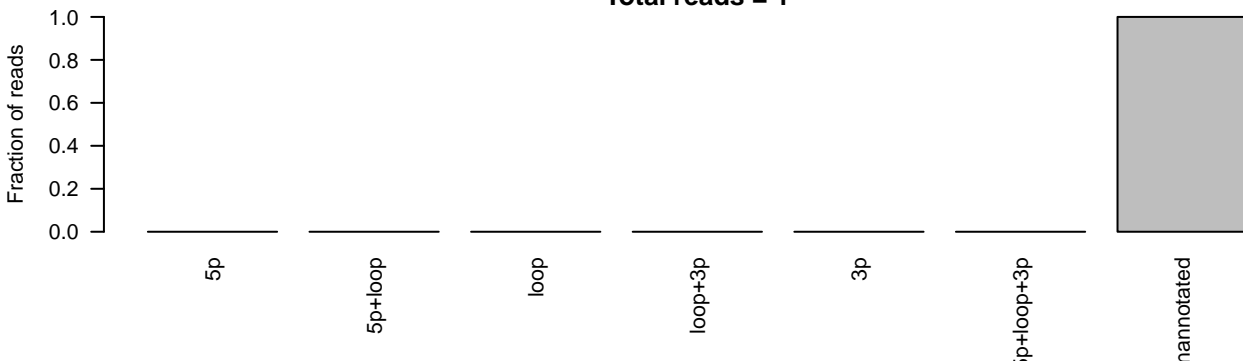



**B) Normal fibroblast miRNA sequencing**  
ID=MI0003156\_1;accession\_number=MI0003156;Name=hsa-mir-518b  
Total reads = 0



**C) PPB Case 14 tumor miRNA sequencing**  
ID=MI0003156\_1;accession\_number=MI0003156;Name=hsa-mir-518b  
Total reads = 0



**D) PPB Case 14 cell line miRNA sequencing**  
ID=MI0003156\_1;accession\_number=MI0003156;Name=hsa-mir-518b  
Total reads = 0



**B) Normal fibroblast miRNA sequencing**  
ID=MI0003157\_1;accession\_number=MI0003157;Name=hsa-mir-526a-1  
Total reads = 0



**C) PPB Case 14 tumor miRNA sequencing**  
ID=MI0003157\_1;accession\_number=MI0003157;Name=hsa-mir-526a-1  
Total reads = 0



**D) PPB Case 14 cell line miRNA sequencing**  
ID=MI0003157\_1;accession\_number=MI0003157;Name=hsa-mir-526a-1  
Total reads = 0



**B) Normal fibroblast miRNA sequencing**  
ID=MI0003158\_1;accession\_number=MI0003158;Name=hsa-mir-520c  
Total reads = 0



**C) PPB Case 14 tumor miRNA sequencing**  
ID=MI0003158\_1;accession\_number=MI0003158;Name=hsa-mir-520c  
Total reads = 0



**D) PPB Case 14 cell line miRNA sequencing**  
ID=MI0003158\_1;accession\_number=MI0003158;Name=hsa-mir-520c  
Total reads = 0



**B) Normal fibroblast miRNA sequencing**  
ID=MI0003159\_1;accession\_number=MI0003159;Name=hsa-mir-518c  
Total reads = 0



**C) PPB Case 14 tumor miRNA sequencing**  
ID=MI0003159\_1;accession\_number=MI0003159;Name=hsa-mir-518c  
Total reads = 0



**D) PPB Case 14 cell line miRNA sequencing**  
ID=MI0003159\_1;accession\_number=MI0003159;Name=hsa-mir-518c  
Total reads = 0



**B) Normal fibroblast miRNA sequencing**  
ID=MI0003160\_1;accession\_number=MI0003160;Name=hsa-mir-524  
Total reads = 0



**C) PPB Case 14 tumor miRNA sequencing**  
ID=MI0003160\_1;accession\_number=MI0003160;Name=hsa-mir-524  
Total reads = 0



**D) PPB Case 14 cell line miRNA sequencing**  
ID=MI0003160\_1;accession\_number=MI0003160;Name=hsa-mir-524  
Total reads = 0



**B) Normal fibroblast miRNA sequencing**  
ID=MI0003161\_1;accession\_number=MI0003161;Name=hsa-mir-517a  
Total reads = 0



**C) PPB Case 14 tumor miRNA sequencing**  
ID=MI0003161\_1;accession\_number=MI0003161;Name=hsa-mir-517a  
Total reads = 0



**D) PPB Case 14 cell line miRNA sequencing**  
ID=MI0003161\_1;accession\_number=MI0003161;Name=hsa-mir-517a  
Total reads = 0



**B) Normal fibroblast miRNA sequencing**  
ID=MI0003162\_1;accession\_number=MI0003162;Name=hsa-mir-519d  
Total reads = 0



**C) PPB Case 14 tumor miRNA sequencing**  
ID=MI0003162\_1;accession\_number=MI0003162;Name=hsa-mir-519d  
Total reads = 0



**D) PPB Case 14 cell line miRNA sequencing**  
ID=MI0003162\_1;accession\_number=MI0003162;Name=hsa-mir-519d  
Total reads = 0



**B) Normal fibroblast miRNA sequencing**  
ID=MI0003163\_1;accession\_number=MI0003163;Name=hsa-mir-521-2  
Total reads = 0



**C) PPB Case 14 tumor miRNA sequencing**  
ID=MI0003163\_1;accession\_number=MI0003163;Name=hsa-mir-521-2  
Total reads = 0



**D) PPB Case 14 cell line miRNA sequencing**  
ID=MI0003163\_1;accession\_number=MI0003163;Name=hsa-mir-521-2  
Total reads = 0





**B) Normal fibroblast miRNA sequencing**  
ID=MI0003164\_1;accession\_number=MI0003164;Name=hsa-mir-520d  
Total reads = 0



**C) PPB Case 14 tumor miRNA sequencing**  
ID=MI0003164\_1;accession\_number=MI0003164;Name=hsa-mir-520d  
Total reads = 0



**D) PPB Case 14 cell line miRNA sequencing**  
ID=MI0003164\_1;accession\_number=MI0003164;Name=hsa-mir-520d  
Total reads = 0



**B) Normal fibroblast miRNA sequencing**  
ID=MI0003165\_1;accession\_number=MI0003165;Name=hsa-mir-517b  
Total reads = 0



**C) PPB Case 14 tumor miRNA sequencing**  
ID=MI0003165\_1;accession\_number=MI0003165;Name=hsa-mir-517b  
Total reads = 0



**D) PPB Case 14 cell line miRNA sequencing**  
ID=MI0003165\_1;accession\_number=MI0003165;Name=hsa-mir-517b  
Total reads = 1

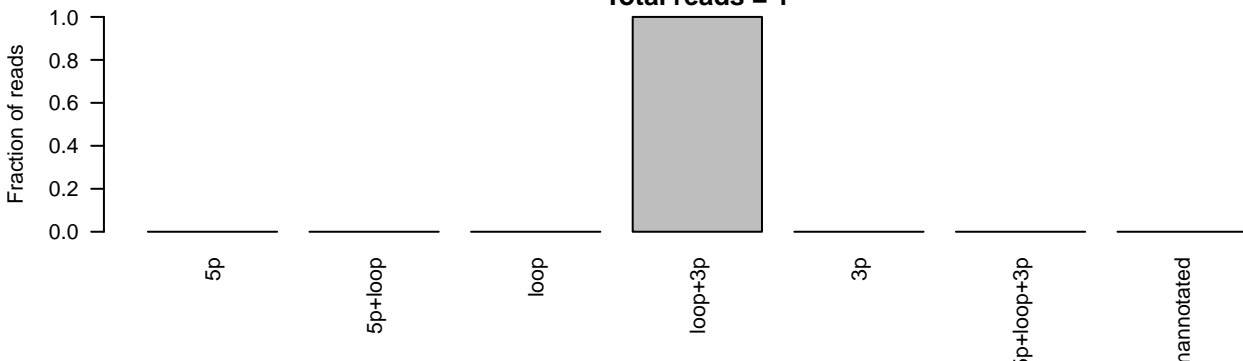

**B) Normal fibroblast miRNA sequencing**  
ID=MI0003166\_1;accession\_number=MI0003166;Name=hsa-mir-520g  
Total reads = 0



**C) PPB Case 14 tumor miRNA sequencing**  
ID=MI0003166\_1;accession\_number=MI0003166;Name=hsa-mir-520g  
Total reads = 0



**D) PPB Case 14 cell line miRNA sequencing**  
ID=MI0003166\_1;accession\_number=MI0003166;Name=hsa-mir-520g  
Total reads = 0



**B) Normal fibroblast miRNA sequencing**  
ID=MI0003167\_1;accession\_number=MI0003167;Name=hsa-mir-516b-2  
Total reads = 0



**C) PPB Case 14 tumor miRNA sequencing**  
ID=MI0003167\_1;accession\_number=MI0003167;Name=hsa-mir-516b-2  
Total reads = 0



**D) PPB Case 14 cell line miRNA sequencing**  
ID=MI0003167\_1;accession\_number=MI0003167;Name=hsa-mir-516b-2  
Total reads = 0



**B) Normal fibroblast miRNA sequencing**  
ID=MI0003168\_1;accession\_number=MI0003168;Name=hsa-mir-526a-2  
Total reads = 0



**C) PPB Case 14 tumor miRNA sequencing**  
ID=MI0003168\_1;accession\_number=MI0003168;Name=hsa-mir-526a-2  
Total reads = 0



**D) PPB Case 14 cell line miRNA sequencing**  
ID=MI0003168\_1;accession\_number=MI0003168;Name=hsa-mir-526a-2  
Total reads = 0



**B) Normal fibroblast miRNA sequencing**  
ID=MI0003169\_1;accession\_number=MI0003169;Name=hsa-mir-518e  
Total reads = 0



**C) PPB Case 14 tumor miRNA sequencing**  
ID=MI0003169\_1;accession\_number=MI0003169;Name=hsa-mir-518e  
Total reads = 0



**D) PPB Case 14 cell line miRNA sequencing**  
ID=MI0003169\_1;accession\_number=MI0003169;Name=hsa-mir-518e  
Total reads = 0



**B) Normal fibroblast miRNA sequencing**  
ID=MI0003170\_1;accession\_number=MI0003170;Name=hsa-mir-518a-1  
Total reads = 0



**C) PPB Case 14 tumor miRNA sequencing**  
ID=MI0003170\_1;accession\_number=MI0003170;Name=hsa-mir-518a-1  
Total reads = 0



**D) PPB Case 14 cell line miRNA sequencing**  
ID=MI0003170\_1;accession\_number=MI0003170;Name=hsa-mir-518a-1  
Total reads = 0



**B) Normal fibroblast miRNA sequencing**  
ID=MI0003171\_1;accession\_number=MI0003171;Name=hsa-mir-518d  
Total reads = 0



**C) PPB Case 14 tumor miRNA sequencing**  
ID=MI0003171\_1;accession\_number=MI0003171;Name=hsa-mir-518d  
Total reads = 0



**D) PPB Case 14 cell line miRNA sequencing**  
ID=MI0003171\_1;accession\_number=MI0003171;Name=hsa-mir-518d  
Total reads = 0





**B) Normal fibroblast miRNA sequencing**  
ID=MI0003172\_1;accession\_number=MI0003172;Name=hsa-mir-516b-1  
Total reads = 0



**C) PPB Case 14 tumor miRNA sequencing**  
ID=MI0003172\_1;accession\_number=MI0003172;Name=hsa-mir-516b-1  
Total reads = 0



**D) PPB Case 14 cell line miRNA sequencing**  
ID=MI0003172\_1;accession\_number=MI0003172;Name=hsa-mir-516b-1  
Total reads = 0



**B) Normal fibroblast miRNA sequencing**  
ID=MI0003173\_1;accession\_number=MI0003173;Name=hsa-mir-518a-2  
Total reads = 0



**C) PPB Case 14 tumor miRNA sequencing**  
ID=MI0003173\_1;accession\_number=MI0003173;Name=hsa-mir-518a-2  
Total reads = 0



**D) PPB Case 14 cell line miRNA sequencing**  
ID=MI0003173\_1;accession\_number=MI0003173;Name=hsa-mir-518a-2  
Total reads = 0



**B) Normal fibroblast miRNA sequencing**  
ID=MI0003174\_1;accession\_number=MI0003174;Name=hsa-mir-517c  
Total reads = 0



**C) PPB Case 14 tumor miRNA sequencing**  
ID=MI0003174\_1;accession\_number=MI0003174;Name=hsa-mir-517c  
Total reads = 0



**D) PPB Case 14 cell line miRNA sequencing**  
ID=MI0003174\_1;accession\_number=MI0003174;Name=hsa-mir-517c  
Total reads = 0



**B) Normal fibroblast miRNA sequencing**  
ID=MI0003175\_1;accession\_number=MI0003175;Name=hsa-mir-520h  
Total reads = 0



**C) PPB Case 14 tumor miRNA sequencing**  
ID=MI0003175\_1;accession\_number=MI0003175;Name=hsa-mir-520h  
Total reads = 0



**D) PPB Case 14 cell line miRNA sequencing**  
ID=MI0003175\_1;accession\_number=MI0003175;Name=hsa-mir-520h  
Total reads = 0



**B) Normal fibroblast miRNA sequencing**  
ID=MI0003176\_1;accession\_number=MI0003176;Name=hsa-mir-521-1  
Total reads = 0



**C) PPB Case 14 tumor miRNA sequencing**  
ID=MI0003176\_1;accession\_number=MI0003176;Name=hsa-mir-521-1  
Total reads = 0



**D) PPB Case 14 cell line miRNA sequencing**  
ID=MI0003176\_1;accession\_number=MI0003176;Name=hsa-mir-521-1  
Total reads = 0



**B) Normal fibroblast miRNA sequencing**  
ID=MI0003177\_1;accession\_number=MI0003177;Name=hsa-mir-522  
Total reads = 0



**C) PPB Case 14 tumor miRNA sequencing**  
ID=MI0003177\_1;accession\_number=MI0003177;Name=hsa-mir-522  
Total reads = 0



**D) PPB Case 14 cell line miRNA sequencing**  
ID=MI0003177\_1;accession\_number=MI0003177;Name=hsa-mir-522  
Total reads = 0



**B) Normal fibroblast miRNA sequencing**  
ID=MI0003178\_1;accession\_number=MI0003178;Name=hsa-mir-519a-1  
Total reads = 0



**C) PPB Case 14 tumor miRNA sequencing**  
ID=MI0003178\_1;accession\_number=MI0003178;Name=hsa-mir-519a-1  
Total reads = 0



**D) PPB Case 14 cell line miRNA sequencing**  
ID=MI0003178\_1;accession\_number=MI0003178;Name=hsa-mir-519a-1  
Total reads = 0



**B) Normal fibroblast miRNA sequencing**  
ID=MI0003179\_1;accession\_number=MI0003179;Name=hsa-mir-527  
Total reads = 0



**C) PPB Case 14 tumor miRNA sequencing**  
ID=MI0003179\_1;accession\_number=MI0003179;Name=hsa-mir-527  
Total reads = 0



**D) PPB Case 14 cell line miRNA sequencing**  
ID=MI0003179\_1;accession\_number=MI0003179;Name=hsa-mir-527  
Total reads = 0





**B) Normal fibroblast miRNA sequencing**  
ID=MI0003180\_1;accession\_number=MI0003180;Name=hsa-mir-516a-1  
Total reads = 0



**C) PPB Case 14 tumor miRNA sequencing**  
ID=MI0003180\_1;accession\_number=MI0003180;Name=hsa-mir-516a-1  
Total reads = 0



**D) PPB Case 14 cell line miRNA sequencing**  
ID=MI0003180\_1;accession\_number=MI0003180;Name=hsa-mir-516a-1  
Total reads = 0



**B) Normal fibroblast miRNA sequencing**  
ID=MI0006430\_1;accession\_number=MI0006430;Name=hsa-mir-1283-2  
Total reads = 0



**C) PPB Case 14 tumor miRNA sequencing**  
ID=MI0006430\_1;accession\_number=MI0006430;Name=hsa-mir-1283-2  
Total reads = 0



**D) PPB Case 14 cell line miRNA sequencing**  
ID=MI0006430\_1;accession\_number=MI0006430;Name=hsa-mir-1283-2  
Total reads = 0



**B) Normal fibroblast miRNA sequencing**  
ID=MI0003181\_1;accession\_number=MI0003181;Name=hsa-mir-516a-2  
Total reads = 0



**C) PPB Case 14 tumor miRNA sequencing**  
ID=MI0003181\_1;accession\_number=MI0003181;Name=hsa-mir-516a-2  
Total reads = 0



**D) PPB Case 14 cell line miRNA sequencing**  
ID=MI0003181\_1;accession\_number=MI0003181;Name=hsa-mir-516a-2  
Total reads = 0



**B) Normal fibroblast miRNA sequencing**  
ID=MI0003182\_1;accession\_number=MI0003182;Name=hsa-mir-519a-2  
Total reads = 0



**C) PPB Case 14 tumor miRNA sequencing**  
ID=MI0003182\_1;accession\_number=MI0003182;Name=hsa-mir-519a-2  
Total reads = 0



**D) PPB Case 14 cell line miRNA sequencing**  
ID=MI0003182\_1;accession\_number=MI0003182;Name=hsa-mir-519a-2  
Total reads = 0



**B) Normal fibroblast miRNA sequencing**  
ID=MI0000779\_1;accession\_number=MI0000779;Name=hsa-mir-371a  
Total reads = 0



**C) PPB Case 14 tumor miRNA sequencing**  
ID=MI0000779\_1;accession\_number=MI0000779;Name=hsa-mir-371a  
Total reads = 0



**D) PPB Case 14 cell line miRNA sequencing**  
ID=MI0000779\_1;accession\_number=MI0000779;Name=hsa-mir-371a  
Total reads = 0



**B) Normal fibroblast miRNA sequencing**  
ID=MI0017393\_1;accession\_number=MI0017393;Name=hsa-mir-371b  
Total reads = 0



**C) PPB Case 14 tumor miRNA sequencing**  
ID=MI0017393\_1;accession\_number=MI0017393;Name=hsa-mir-371b  
Total reads = 0



**D) PPB Case 14 cell line miRNA sequencing**  
ID=MI0017393\_1;accession\_number=MI0017393;Name=hsa-mir-371b  
Total reads = 0



**B) Normal fibroblast miRNA sequencing**  
ID=MI0000780\_1;accession\_number=MI0000780;Name=hsa-mir-372  
Total reads = 0



**C) PPB Case 14 tumor miRNA sequencing**  
ID=MI0000780\_1;accession\_number=MI0000780;Name=hsa-mir-372  
Total reads = 0



**D) PPB Case 14 cell line miRNA sequencing**  
ID=MI0000780\_1;accession\_number=MI0000780;Name=hsa-mir-372  
Total reads = 0



**B) Normal fibroblast miRNA sequencing**  
ID=MI0000781\_1;accession\_number=MI0000781;Name=hsa-mir-373  
Total reads = 0



**C) PPB Case 14 tumor miRNA sequencing**  
ID=MI0000781\_1;accession\_number=MI0000781;Name=hsa-mir-373  
Total reads = 0



**D) PPB Case 14 cell line miRNA sequencing**  
ID=MI0000781\_1;accession\_number=MI0000781;Name=hsa-mir-373  
Total reads = 0





**B) Normal fibroblast miRNA sequencing**  
ID=MI0005757\_1;accession\_number=MI0005757;Name=hsa-mir-935  
Total reads = 0



**C) PPB Case 14 tumor miRNA sequencing**  
ID=MI0005757\_1;accession\_number=MI0005757;Name=hsa-mir-935  
Total reads = 0



**D) PPB Case 14 cell line miRNA sequencing**  
ID=MI0005757\_1;accession\_number=MI0005757;Name=hsa-mir-935  
Total reads = 0



**B) Normal fibroblast miRNA sequencing**  
ID=MI0017391\_1;accession\_number=MI0017391;Name=hsa-mir-4752  
Total reads = 0



**C) PPB Case 14 tumor miRNA sequencing**  
ID=MI0017391\_1;accession\_number=MI0017391;Name=hsa-mir-4752  
Total reads = 0



**D) PPB Case 14 cell line miRNA sequencing**  
ID=MI0017391\_1;accession\_number=MI0017391;Name=hsa-mir-4752  
Total reads = 0



**B) Normal fibroblast miRNA sequencing**  
ID=MI0017394\_1;accession\_number=MI0017394;Name=hsa-mir-4754  
Total reads = 0



**C) PPB Case 14 tumor miRNA sequencing**  
ID=MI0017394\_1;accession\_number=MI0017394;Name=hsa-mir-4754  
Total reads = 0



**D) PPB Case 14 cell line miRNA sequencing**  
ID=MI0017394\_1;accession\_number=MI0017394;Name=hsa-mir-4754  
Total reads = 0



**B) Normal fibroblast miRNA sequencing**  
ID=MI0015868\_1;accession\_number=MI0015868;Name=hsa-mir-4261  
Total reads = 0



**C) PPB Case 14 tumor miRNA sequencing**  
ID=MI0015868\_1;accession\_number=MI0015868;Name=hsa-mir-4261  
Total reads = 0



**D) PPB Case 14 cell line miRNA sequencing**  
ID=MI0015868\_1;accession\_number=MI0015868;Name=hsa-mir-4261  
Total reads = 0



**B) Normal fibroblast miRNA sequencing**  
ID=MI0016768\_1;accession\_number=MI0016768;Name=hsa-mir-4429  
Total reads = 0



**C) PPB Case 14 tumor miRNA sequencing**  
ID=MI0016768\_1;accession\_number=MI0016768;Name=hsa-mir-4429  
Total reads = 0



**D) PPB Case 14 cell line miRNA sequencing**  
ID=MI0016768\_1;accession\_number=MI0016768;Name=hsa-mir-4429  
Total reads = 0



**B) Normal fibroblast miRNA sequencing**  
ID=MI0014141\_1;accession\_number=MI0014141;Name=hsa-mir-548s  
Total reads = 0



**C) PPB Case 14 tumor miRNA sequencing**  
ID=MI0014141\_1;accession\_number=MI0014141;Name=hsa-mir-548s  
Total reads = 0



**D) PPB Case 14 cell line miRNA sequencing**  
ID=MI0014141\_1;accession\_number=MI0014141;Name=hsa-mir-548s  
Total reads = 0



**B) Normal fibroblast miRNA sequencing**  
ID=MI0015872\_1;accession\_number=MI0015872;Name=hsa-mir-4262  
Total reads = 0



**C) PPB Case 14 tumor miRNA sequencing**  
ID=MI0015872\_1;accession\_number=MI0015872;Name=hsa-mir-4262  
Total reads = 0



**D) PPB Case 14 cell line miRNA sequencing**  
ID=MI0015872\_1;accession\_number=MI0015872;Name=hsa-mir-4262  
Total reads = 0



**B) Normal fibroblast miRNA sequencing**  
ID=MI0016082\_1;accession\_number=MI0016082;Name=hsa-mir-3681  
Total reads = 0



**C) PPB Case 14 tumor miRNA sequencing**  
ID=MI0016082\_1;accession\_number=MI0016082;Name=hsa-mir-3681  
Total reads = 0



**D) PPB Case 14 cell line miRNA sequencing**  
ID=MI0016082\_1;accession\_number=MI0016082;Name=hsa-mir-3681  
Total reads = 0





**B) Normal fibroblast miRNA sequencing**  
ID=MI0014142\_1;accession\_number=MI0014142;Name=hsa-mir-3125  
Total reads = 0



**C) PPB Case 14 tumor miRNA sequencing**  
ID=MI0014142\_1;accession\_number=MI0014142;Name=hsa-mir-3125  
Total reads = 0



**D) PPB Case 14 cell line miRNA sequencing**  
ID=MI0014142\_1;accession\_number=MI0014142;Name=hsa-mir-3125  
Total reads = 0



**B) Normal fibroblast miRNA sequencing**  
ID=MI0017398\_1;accession\_number=MI0017398;Name=hsa-mir-4757  
Total reads = 0



**C) PPB Case 14 tumor miRNA sequencing**  
ID=MI0017398\_1;accession\_number=MI0017398;Name=hsa-mir-4757  
Total reads = 0



**D) PPB Case 14 cell line miRNA sequencing**  
ID=MI0017398\_1;accession\_number=MI0017398;Name=hsa-mir-4757  
Total reads = 0



**B) Normal fibroblast miRNA sequencing**  
ID=MI0015876\_1;accession\_number=MI0015876;Name=hsa-mir-4263  
Total reads = 0



**C) PPB Case 14 tumor miRNA sequencing**  
ID=MI0015876\_1;accession\_number=MI0015876;Name=hsa-mir-4263  
Total reads = 0



**D) PPB Case 14 cell line miRNA sequencing**  
ID=MI0015876\_1;accession\_number=MI0015876;Name=hsa-mir-4263  
Total reads = 0



**B) Normal fibroblast miRNA sequencing**  
ID=MI0003564\_1;accession\_number=MI0003564;Name=hsa-mir-558  
Total reads = 0



**C) PPB Case 14 tumor miRNA sequencing**  
ID=MI0003564\_1;accession\_number=MI0003564;Name=hsa-mir-558  
Total reads = 0



**D) PPB Case 14 cell line miRNA sequencing**  
ID=MI0003564\_1;accession\_number=MI0003564;Name=hsa-mir-558  
Total reads = 0



**B) Normal fibroblast miRNA sequencing**  
ID=MI0017406\_1;accession\_number=MI0017406;Name=hsa-mir-4765  
Total reads = 0



**C) PPB Case 14 tumor miRNA sequencing**  
ID=MI0017406\_1;accession\_number=MI0017406;Name=hsa-mir-4765  
Total reads = 0



**D) PPB Case 14 cell line miRNA sequencing**  
ID=MI0017406\_1;accession\_number=MI0017406;Name=hsa-mir-4765  
Total reads = 0



**B) Normal fibroblast miRNA sequencing**  
ID=MI0016769\_1;accession\_number=MI0016769;Name=hsa-mir-4430  
Total reads = 0



**C) PPB Case 14 tumor miRNA sequencing**  
ID=MI0016769\_1;accession\_number=MI0016769;Name=hsa-mir-4430  
Total reads = 0



**D) PPB Case 14 cell line miRNA sequencing**  
ID=MI0016769\_1;accession\_number=MI0016769;Name=hsa-mir-4430  
Total reads = 0



**B) Normal fibroblast miRNA sequencing**  
ID=MI0016770\_1;accession\_number=MI0016770;Name=hsa-mir-548ad  
Total reads = 0



**C) PPB Case 14 tumor miRNA sequencing**  
ID=MI0016770\_1;accession\_number=MI0016770;Name=hsa-mir-548ad  
Total reads = 0



**D) PPB Case 14 cell line miRNA sequencing**  
ID=MI0016770\_1;accession\_number=MI0016770;Name=hsa-mir-548ad  
Total reads = 0



**B) Normal fibroblast miRNA sequencing**  
ID=MI0003565\_1;accession\_number=MI0003565;Name=hsa-mir-559  
Total reads = 0



**C) PPB Case 14 tumor miRNA sequencing**  
ID=MI0003565\_1;accession\_number=MI0003565;Name=hsa-mir-559  
Total reads = 0



**D) PPB Case 14 cell line miRNA sequencing**  
ID=MI0003565\_1;accession\_number=MI0003565;Name=hsa-mir-559  
Total reads = 0





**B) Normal fibroblast miRNA sequencing**  
ID=MI0016771\_1;accession\_number=MI0016771;Name=hsa-mir-4431  
Total reads = 0



**C) PPB Case 14 tumor miRNA sequencing**  
ID=MI0016771\_1;accession\_number=MI0016771;Name=hsa-mir-4431  
Total reads = 0



**D) PPB Case 14 cell line miRNA sequencing**  
ID=MI0016771\_1;accession\_number=MI0016771;Name=hsa-mir-4431  
Total reads = 0



**B) Normal fibroblast miRNA sequencing**  
ID=MI0016083\_1;accession\_number=MI0016083;Name=hsa-mir-3682  
Total reads = 0



**C) PPB Case 14 tumor miRNA sequencing**  
ID=MI0016083\_1;accession\_number=MI0016083;Name=hsa-mir-3682  
Total reads = 0



**D) PPB Case 14 cell line miRNA sequencing**  
ID=MI0016083\_1;accession\_number=MI0016083;Name=hsa-mir-3682  
Total reads = 0



**B) Normal fibroblast miRNA sequencing**  
ID=MI0000293\_1;accession\_number=MI0000293;Name=hsa-mir-217  
Total reads = 0



**C) PPB Case 14 tumor miRNA sequencing**  
ID=MI0000293\_1;accession\_number=MI0000293;Name=hsa-mir-217  
Total reads = 0



**D) PPB Case 14 cell line miRNA sequencing**  
ID=MI0000293\_1;accession\_number=MI0000293;Name=hsa-mir-217  
Total reads = 0



**B) Normal fibroblast miRNA sequencing**  
ID=MI0000292\_1;accession\_number=MI0000292;Name=hsa-mir-216a  
Total reads = 0



**C) PPB Case 14 tumor miRNA sequencing**  
ID=MI0000292\_1;accession\_number=MI0000292;Name=hsa-mir-216a  
Total reads = 0



**D) PPB Case 14 cell line miRNA sequencing**  
ID=MI0000292\_1;accession\_number=MI0000292;Name=hsa-mir-216a  
Total reads = 0



**B) Normal fibroblast miRNA sequencing**  
ID=MI0005569\_1;accession\_number=MI0005569;Name=hsa-mir-216b  
Total reads = 0



**C) PPB Case 14 tumor miRNA sequencing**  
ID=MI0005569\_1;accession\_number=MI0005569;Name=hsa-mir-216b  
Total reads = 0



**D) PPB Case 14 cell line miRNA sequencing**  
ID=MI0005569\_1;accession\_number=MI0005569;Name=hsa-mir-216b  
Total reads = 0



**B) Normal fibroblast miRNA sequencing**  
ID=MI0016772\_1;accession\_number=MI0016772;Name=hsa-mir-4432  
Total reads = 0



**C) PPB Case 14 tumor miRNA sequencing**  
ID=MI0016772\_1;accession\_number=MI0016772;Name=hsa-mir-4432  
Total reads = 0



**D) PPB Case 14 cell line miRNA sequencing**  
ID=MI0016772\_1;accession\_number=MI0016772;Name=hsa-mir-4432  
Total reads = 0



**B) Normal fibroblast miRNA sequencing**  
ID=MI0018171\_1;accession\_number=MI0018171;Name=hsa-mir-5192  
Total reads = 0



**C) PPB Case 14 tumor miRNA sequencing**  
ID=MI0018171\_1;accession\_number=MI0018171;Name=hsa-mir-5192  
Total reads = 0



**D) PPB Case 14 cell line miRNA sequencing**  
ID=MI0018171\_1;accession\_number=MI0018171;Name=hsa-mir-5192  
Total reads = 0



**B) Normal fibroblast miRNA sequencing**  
ID=MI0016773\_1;accession\_number=MI0016773;Name=hsa-mir-4433  
Total reads = 0



**C) PPB Case 14 tumor miRNA sequencing**  
ID=MI0016773\_1;accession\_number=MI0016773;Name=hsa-mir-4433  
Total reads = 0



**D) PPB Case 14 cell line miRNA sequencing**  
ID=MI0016773\_1;accession\_number=MI0016773;Name=hsa-mir-4433  
Total reads = 0





**B) Normal fibroblast miRNA sequencing**  
ID=MI0016774\_1;accession\_number=MI0016774;Name=hsa-mir-4434  
Total reads = 0



**C) PPB Case 14 tumor miRNA sequencing**  
ID=MI0016774\_1;accession\_number=MI0016774;Name=hsa-mir-4434  
Total reads = 0



**D) PPB Case 14 cell line miRNA sequencing**  
ID=MI0016774\_1;accession\_number=MI0016774;Name=hsa-mir-4434  
Total reads = 0



**B) Normal fibroblast miRNA sequencing**  
ID=MI0017422\_1;accession\_number=MI0017422;Name=hsa-mir-4778  
Total reads = 0



**C) PPB Case 14 tumor miRNA sequencing**  
ID=MI0017422\_1;accession\_number=MI0017422;Name=hsa-mir-4778  
Total reads = 0



**D) PPB Case 14 cell line miRNA sequencing**  
ID=MI0017422\_1;accession\_number=MI0017422;Name=hsa-mir-4778  
Total reads = 0



**B) Normal fibroblast miRNA sequencing**  
ID=MI0014143\_1;accession\_number=MI0014143;Name=hsa-mir-3126  
Total reads = 0



**C) PPB Case 14 tumor miRNA sequencing**  
ID=MI0014143\_1;accession\_number=MI0014143;Name=hsa-mir-3126  
Total reads = 4

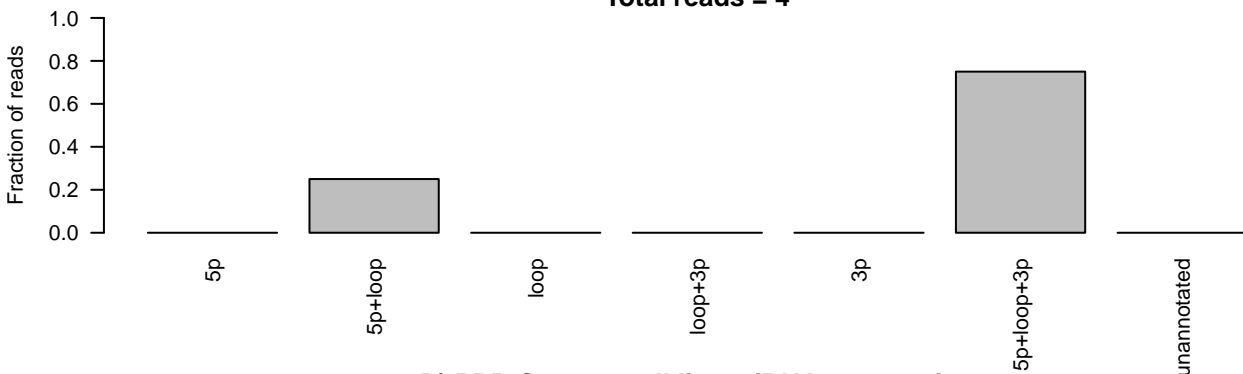

**D) PPB Case 14 cell line miRNA sequencing**  
ID=MI0014143\_1;accession\_number=MI0014143;Name=hsa-mir-3126  
Total reads = 1



**B) Normal fibroblast miRNA sequencing**  
ID=MI0006347\_1;accession\_number=MI0006347;Name=hsa-mir-1285-2  
Total reads = 0



**C) PPB Case 14 tumor miRNA sequencing**  
ID=MI0006347\_1;accession\_number=MI0006347;Name=hsa-mir-1285-2  
Total reads = 0



**D) PPB Case 14 cell line miRNA sequencing**  
ID=MI0006347\_1;accession\_number=MI0006347;Name=hsa-mir-1285-2  
Total reads = 0



**B) Normal fibroblast miRNA sequencing**  
ID=MI0017866\_1;accession\_number=MI0017866;Name=hsa-mir-5000  
Total reads = 0



**C) PPB Case 14 tumor miRNA sequencing**  
ID=MI0017866\_1;accession\_number=MI0017866;Name=hsa-mir-5000  
Total reads = 0



**D) PPB Case 14 cell line miRNA sequencing**  
ID=MI0017866\_1;accession\_number=MI0017866;Name=hsa-mir-5000  
Total reads = 0



**B) Normal fibroblast miRNA sequencing**  
ID=MI0015877\_1;accession\_number=MI0015877;Name=hsa-mir-4264  
Total reads = 0



**C) PPB Case 14 tumor miRNA sequencing**  
ID=MI0015877\_1;accession\_number=MI0015877;Name=hsa-mir-4264  
Total reads = 0



**D) PPB Case 14 cell line miRNA sequencing**  
ID=MI0015877\_1;accession\_number=MI0015877;Name=hsa-mir-4264  
Total reads = 0



**B) Normal fibroblast miRNA sequencing**  
ID=MI0020348\_1;accession\_number=MI0020348;Name=hsa-mir-6071  
Total reads = 0



**C) PPB Case 14 tumor miRNA sequencing**  
ID=MI0020348\_1;accession\_number=MI0020348;Name=hsa-mir-6071  
Total reads = 0



**D) PPB Case 14 cell line miRNA sequencing**  
ID=MI0020348\_1;accession\_number=MI0020348;Name=hsa-mir-6071  
Total reads = 0



**B) Normal fibroblast miRNA sequencing**  
ID=MI0017423\_1;accession\_number=MI0017423;Name=hsa-mir-4779  
Total reads = 0



**C) PPB Case 14 tumor miRNA sequencing**  
ID=MI0017423\_1;accession\_number=MI0017423;Name=hsa-mir-4779  
Total reads = 0



**D) PPB Case 14 cell line miRNA sequencing**  
ID=MI0017423\_1;accession\_number=MI0017423;Name=hsa-mir-4779  
Total reads = 0





**B) Normal fibroblast miRNA sequencing**  
ID=MI0017412\_1;accession\_number=MI0017412;Name=hsa-mir-4771-1  
Total reads = 0



**C) PPB Case 14 tumor miRNA sequencing**  
ID=MI0017412\_1;accession\_number=MI0017412;Name=hsa-mir-4771-1  
Total reads = 0



**D) PPB Case 14 cell line miRNA sequencing**  
ID=MI0017412\_1;accession\_number=MI0017412;Name=hsa-mir-4771-1  
Total reads = 0



**B) Normal fibroblast miRNA sequencing**  
ID=MI0016775\_1;accession\_number=MI0016775;Name=hsa-mir-4435-1  
Total reads = 0



**C) PPB Case 14 tumor miRNA sequencing**  
ID=MI0016775\_1;accession\_number=MI0016775;Name=hsa-mir-4435-1  
Total reads = 0



**D) PPB Case 14 cell line miRNA sequencing**  
ID=MI0016775\_1;accession\_number=MI0016775;Name=hsa-mir-4435-1  
Total reads = 0



**B) Normal fibroblast miRNA sequencing**  
ID=MI0017424\_1;accession\_number=MI0017424;Name=hsa-mir-4780  
Total reads = 0



**C) PPB Case 14 tumor miRNA sequencing**  
ID=MI0017424\_1;accession\_number=MI0017424;Name=hsa-mir-4780  
Total reads = 0



**D) PPB Case 14 cell line miRNA sequencing**  
ID=MI0017424\_1;accession\_number=MI0017424;Name=hsa-mir-4780  
Total reads = 0



**B) Normal fibroblast miRNA sequencing**  
ID=MI0016776\_1;accession\_number=MI0016776;Name=hsa-mir-4436a  
Total reads = 0



**C) PPB Case 14 tumor miRNA sequencing**  
ID=MI0016776\_1;accession\_number=MI0016776;Name=hsa-mir-4436a  
Total reads = 0



**D) PPB Case 14 cell line miRNA sequencing**  
ID=MI0016776\_1;accession\_number=MI0016776;Name=hsa-mir-4436a  
Total reads = 0



**B) Normal fibroblast miRNA sequencing**  
ID=MI0014144\_1;accession\_number=MI0014144;Name=hsa-mir-3127  
Total reads = 0



**C) PPB Case 14 tumor miRNA sequencing**  
ID=MI0014144\_1;accession\_number=MI0014144;Name=hsa-mir-3127  
Total reads = 0



**D) PPB Case 14 cell line miRNA sequencing**  
ID=MI0014144\_1;accession\_number=MI0014144;Name=hsa-mir-3127  
Total reads = 0



**B) Normal fibroblast miRNA sequencing**  
ID=MI0019303\_1;accession\_number=MI0019303;Name=hsa-mir-5696  
Total reads = 0



**C) PPB Case 14 tumor miRNA sequencing**  
ID=MI0019303\_1;accession\_number=MI0019303;Name=hsa-mir-5696  
Total reads = 0



**D) PPB Case 14 cell line miRNA sequencing**  
ID=MI0019303\_1;accession\_number=MI0019303;Name=hsa-mir-5696  
Total reads = 0



**B) Normal fibroblast miRNA sequencing**  
ID=MI0017414\_1;accession\_number=MI0017414;Name=hsa-mir-4772  
Total reads = 0



**C) PPB Case 14 tumor miRNA sequencing**  
ID=MI0017414\_1;accession\_number=MI0017414;Name=hsa-mir-4772  
Total reads = 0



**D) PPB Case 14 cell line miRNA sequencing**  
ID=MI0017414\_1;accession\_number=MI0017414;Name=hsa-mir-4772  
Total reads = 0



**B) Normal fibroblast miRNA sequencing**  
ID=MI0015869\_1;accession\_number=MI0015869;Name=hsa-mir-4265  
Total reads = 0



**C) PPB Case 14 tumor miRNA sequencing**  
ID=MI0015869\_1;accession\_number=MI0015869;Name=hsa-mir-4265  
Total reads = 0



**D) PPB Case 14 cell line miRNA sequencing**  
ID=MI0015869\_1;accession\_number=MI0015869;Name=hsa-mir-4265  
Total reads = 0





**B) Normal fibroblast miRNA sequencing**  
ID=MI0015870\_1;accession\_number=MI0015870;Name=hsa-mir-4266  
Total reads = 0



**C) PPB Case 14 tumor miRNA sequencing**  
ID=MI0015870\_1;accession\_number=MI0015870;Name=hsa-mir-4266  
Total reads = 0



**D) PPB Case 14 cell line miRNA sequencing**  
ID=MI0015870\_1;accession\_number=MI0015870;Name=hsa-mir-4266  
Total reads = 0



**B) Normal fibroblast miRNA sequencing**  
ID=MI0015871\_1;accession\_number=MI0015871;Name=hsa-mir-4267  
Total reads = 0



**C) PPB Case 14 tumor miRNA sequencing**  
ID=MI0015871\_1;accession\_number=MI0015871;Name=hsa-mir-4267  
Total reads = 0



**D) PPB Case 14 cell line miRNA sequencing**  
ID=MI0015871\_1;accession\_number=MI0015871;Name=hsa-mir-4267  
Total reads = 0



**B) Normal fibroblast miRNA sequencing**  
ID=MI0017425\_1;accession\_number=MI0017425;Name=hsa-mir-4436b-1  
Total reads = 0



**C) PPB Case 14 tumor miRNA sequencing**  
ID=MI0017425\_1;accession\_number=MI0017425;Name=hsa-mir-4436b-1  
Total reads = 0



**D) PPB Case 14 cell line miRNA sequencing**  
ID=MI0017425\_1;accession\_number=MI0017425;Name=hsa-mir-4436b-1  
Total reads = 0



**B) Normal fibroblast miRNA sequencing**  
ID=MI0019110\_1;accession\_number=MI0019110;Name=hsa-mir-4436b-2  
Total reads = 0



**C) PPB Case 14 tumor miRNA sequencing**  
ID=MI0019110\_1;accession\_number=MI0019110;Name=hsa-mir-4436b-2  
Total reads = 0



**D) PPB Case 14 cell line miRNA sequencing**  
ID=MI0019110\_1;accession\_number=MI0019110;Name=hsa-mir-4436b-2  
Total reads = 0



**B) Normal fibroblast miRNA sequencing**  
ID=MI0016777\_1;accession\_number=MI0016777;Name=hsa-mir-4435-2  
Total reads = 0



**C) PPB Case 14 tumor miRNA sequencing**  
ID=MI0016777\_1;accession\_number=MI0016777;Name=hsa-mir-4435-2  
Total reads = 0



**D) PPB Case 14 cell line miRNA sequencing**  
ID=MI0016777\_1;accession\_number=MI0016777;Name=hsa-mir-4435-2  
Total reads = 0



**B) Normal fibroblast miRNA sequencing**  
ID=MI0017413\_1;accession\_number=MI0017413;Name=hsa-mir-4771-2  
Total reads = 0



**C) PPB Case 14 tumor miRNA sequencing**  
ID=MI0017413\_1;accession\_number=MI0017413;Name=hsa-mir-4771-2  
Total reads = 0



**D) PPB Case 14 cell line miRNA sequencing**  
ID=MI0017413\_1;accession\_number=MI0017413;Name=hsa-mir-4771-2  
Total reads = 0



**B) Normal fibroblast miRNA sequencing**  
ID=MI0006364\_1;accession\_number=MI0006364;Name=hsa-mir-1302-3  
Total reads = 0



**C) PPB Case 14 tumor miRNA sequencing**  
ID=MI0006364\_1;accession\_number=MI0006364;Name=hsa-mir-1302-3  
Total reads = 0



**D) PPB Case 14 cell line miRNA sequencing**  
ID=MI0006364\_1;accession\_number=MI0006364;Name=hsa-mir-1302-3  
Total reads = 0



**B) Normal fibroblast miRNA sequencing**  
ID=MI0017427\_1;accession\_number=MI0017427;Name=hsa-mir-4782  
Total reads = 0



**C) PPB Case 14 tumor miRNA sequencing**  
ID=MI0017427\_1;accession\_number=MI0017427;Name=hsa-mir-4782  
Total reads = 0



**D) PPB Case 14 cell line miRNA sequencing**  
ID=MI0017427\_1;accession\_number=MI0017427;Name=hsa-mir-4782  
Total reads = 0





**B) Normal fibroblast miRNA sequencing**  
ID=MI0017428\_1;accession\_number=MI0017428;Name=hsa-mir-4783  
Total reads = 0



**C) PPB Case 14 tumor miRNA sequencing**  
ID=MI0017428\_1;accession\_number=MI0017428;Name=hsa-mir-4783  
Total reads = 0



**D) PPB Case 14 cell line miRNA sequencing**  
ID=MI0017428\_1;accession\_number=MI0017428;Name=hsa-mir-4783  
Total reads = 0



**B) Normal fibroblast miRNA sequencing**  
ID=MI0017429\_1;accession\_number=MI0017429;Name=hsa-mir-4784  
Total reads = 0



**C) PPB Case 14 tumor miRNA sequencing**  
ID=MI0017429\_1;accession\_number=MI0017429;Name=hsa-mir-4784  
Total reads = 0



**D) PPB Case 14 cell line miRNA sequencing**  
ID=MI0017429\_1;accession\_number=MI0017429;Name=hsa-mir-4784  
Total reads = 0



**B) Normal fibroblast miRNA sequencing**  
ID=MI0006336\_1;accession\_number=MI0006336;Name=hsa-mir-663b  
Total reads = 0



**C) PPB Case 14 tumor miRNA sequencing**  
ID=MI0006336\_1;accession\_number=MI0006336;Name=hsa-mir-663b  
Total reads = 0



**D) PPB Case 14 cell line miRNA sequencing**  
ID=MI0006336\_1;accession\_number=MI0006336;Name=hsa-mir-663b  
Total reads = 0



**B) Normal fibroblast miRNA sequencing**  
ID=MI0016080\_1;accession\_number=MI0016080;Name=hsa-mir-3679  
Total reads = 0



**C) PPB Case 14 tumor miRNA sequencing**  
ID=MI0016080\_1;accession\_number=MI0016080;Name=hsa-mir-3679  
Total reads = 0



**D) PPB Case 14 cell line miRNA sequencing**  
ID=MI0016080\_1;accession\_number=MI0016080;Name=hsa-mir-3679  
Total reads = 0



**B) Normal fibroblast miRNA sequencing**  
ID=MI0019150\_1;accession\_number=MI0019150;Name=hsa-mir-5590  
Total reads = 0



**C) PPB Case 14 tumor miRNA sequencing**  
ID=MI0019150\_1;accession\_number=MI0019150;Name=hsa-mir-5590  
Total reads = 0



**D) PPB Case 14 cell line miRNA sequencing**  
ID=MI0019150\_1;accession\_number=MI0019150;Name=hsa-mir-5590  
Total reads = 0



**B) Normal fibroblast miRNA sequencing**  
ID=MI0000447\_1;accession\_number=MI0000447;Name=hsa-mir-128-1  
Total reads = 0



**C) PPB Case 14 tumor miRNA sequencing**  
ID=MI0000447\_1;accession\_number=MI0000447;Name=hsa-mir-128-1  
Total reads = 0



**D) PPB Case 14 cell line miRNA sequencing**  
ID=MI0000447\_1;accession\_number=MI0000447;Name=hsa-mir-128-1  
Total reads = 0



**B) Normal fibroblast miRNA sequencing**  
ID=MI0017415\_1;accession\_number=MI0017415;Name=hsa-mir-4773-1  
Total reads = 0



**C) PPB Case 14 tumor miRNA sequencing**  
ID=MI0017415\_1;accession\_number=MI0017415;Name=hsa-mir-4773-1  
Total reads = 0



**D) PPB Case 14 cell line miRNA sequencing**  
ID=MI0017415\_1;accession\_number=MI0017415;Name=hsa-mir-4773-1  
Total reads = 0



**B) Normal fibroblast miRNA sequencing**  
ID=MI0017416\_1;accession\_number=MI0017416;Name=hsa-mir-4773-2  
Total reads = 0



**C) PPB Case 14 tumor miRNA sequencing**  
ID=MI0017416\_1;accession\_number=MI0017416;Name=hsa-mir-4773-2  
Total reads = 0



**D) PPB Case 14 cell line miRNA sequencing**  
ID=MI0017416\_1;accession\_number=MI0017416;Name=hsa-mir-4773-2  
Total reads = 0





**B) Normal fibroblast miRNA sequencing**  
ID=MI0017430\_1;accession\_number=MI0017430;Name=hsa-mir-4785  
Total reads = 0



**C) PPB Case 14 tumor miRNA sequencing**  
ID=MI0017430\_1;accession\_number=MI0017430;Name=hsa-mir-4785  
Total reads = 0



**D) PPB Case 14 cell line miRNA sequencing**  
ID=MI0017430\_1;accession\_number=MI0017430;Name=hsa-mir-4785  
Total reads = 0



**B) Normal fibroblast miRNA sequencing**  
ID=MI0017417\_1;accession\_number=MI0017417;Name=hsa-mir-4774  
Total reads = 0



**C) PPB Case 14 tumor miRNA sequencing**  
ID=MI0017417\_1;accession\_number=MI0017417;Name=hsa-mir-4774  
Total reads = 0



**D) PPB Case 14 cell line miRNA sequencing**  
ID=MI0017417\_1;accession\_number=MI0017417;Name=hsa-mir-4774  
Total reads = 0



**B) Normal fibroblast miRNA sequencing**  
ID=MI0005755\_1;accession\_number=MI0005755;Name=hsa-mir-933  
Total reads = 0



**C) PPB Case 14 tumor miRNA sequencing**  
ID=MI0005755\_1;accession\_number=MI0005755;Name=hsa-mir-933  
Total reads = 2



**D) PPB Case 14 cell line miRNA sequencing**  
ID=MI0005755\_1;accession\_number=MI0005755;Name=hsa-mir-933  
Total reads = 0



**B) Normal fibroblast miRNA sequencing**  
ID=MI0000267\_1;accession\_number=MI0000267;Name=hsa-mir-10b  
Total reads = 0



**C) PPB Case 14 tumor miRNA sequencing**  
ID=MI0000267\_1;accession\_number=MI0000267;Name=hsa-mir-10b  
Total reads = 15

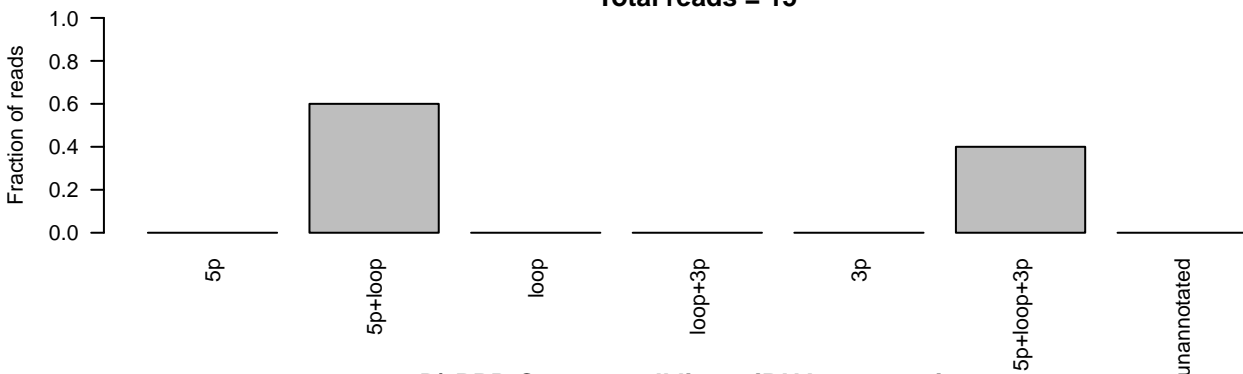

**D) PPB Case 14 cell line miRNA sequencing**  
ID=MI0000267\_1;accession\_number=MI0000267;Name=hsa-mir-10b  
Total reads = 8

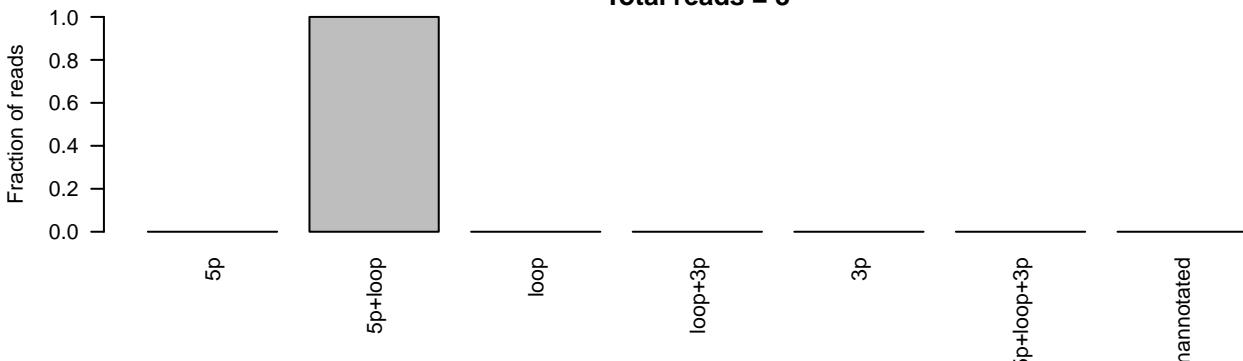

**B) Normal fibroblast miRNA sequencing**  
ID=MI0006381\_1;accession\_number=MI0006381;Name=hsa-mir-1246  
Total reads = 0



**C) PPB Case 14 tumor miRNA sequencing**  
ID=MI0006381\_1;accession\_number=MI0006381;Name=hsa-mir-1246  
Total reads = 0



**D) PPB Case 14 cell line miRNA sequencing**  
ID=MI0006381\_1;accession\_number=MI0006381;Name=hsa-mir-1246  
Total reads = 0



**B) Normal fibroblast miRNA sequencing**  
ID=MI0016787\_1;accession\_number=MI0016787;Name=hsa-mir-4444-1  
Total reads = 0



**C) PPB Case 14 tumor miRNA sequencing**  
ID=MI0016787\_1;accession\_number=MI0016787;Name=hsa-mir-4444-1  
Total reads = 0



**D) PPB Case 14 cell line miRNA sequencing**  
ID=MI0016787\_1;accession\_number=MI0016787;Name=hsa-mir-4444-1  
Total reads = 0



**B) Normal fibroblast miRNA sequencing**  
ID=MI0014145\_1;accession\_number=MI0014145;Name=hsa-mir-3128  
Total reads = 0



**C) PPB Case 14 tumor miRNA sequencing**  
ID=MI0014145\_1;accession\_number=MI0014145;Name=hsa-mir-3128  
Total reads = 0



**D) PPB Case 14 cell line miRNA sequencing**  
ID=MI0014145\_1;accession\_number=MI0014145;Name=hsa-mir-3128  
Total reads = 0



**B) Normal fibroblast miRNA sequencing**  
ID=MI0022224\_1;accession\_number=MI0022224;Name=hsa-mir-6512  
Total reads = 0

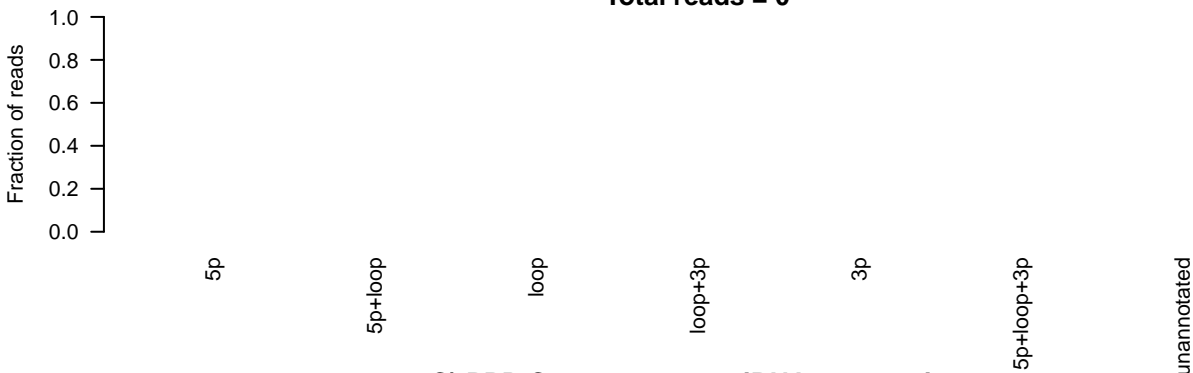

**C) PPB Case 14 tumor miRNA sequencing**  
ID=MI0022224\_1;accession\_number=MI0022224;Name=hsa-mir-6512  
Total reads = 0

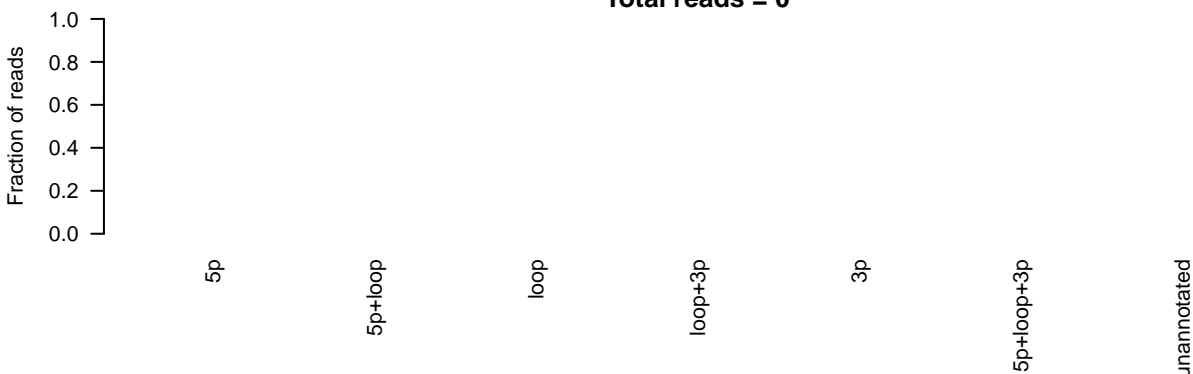

**D) PPB Case 14 cell line miRNA sequencing**  
ID=MI0022224\_1;accession\_number=MI0022224;Name=hsa-mir-6512  
Total reads = 0

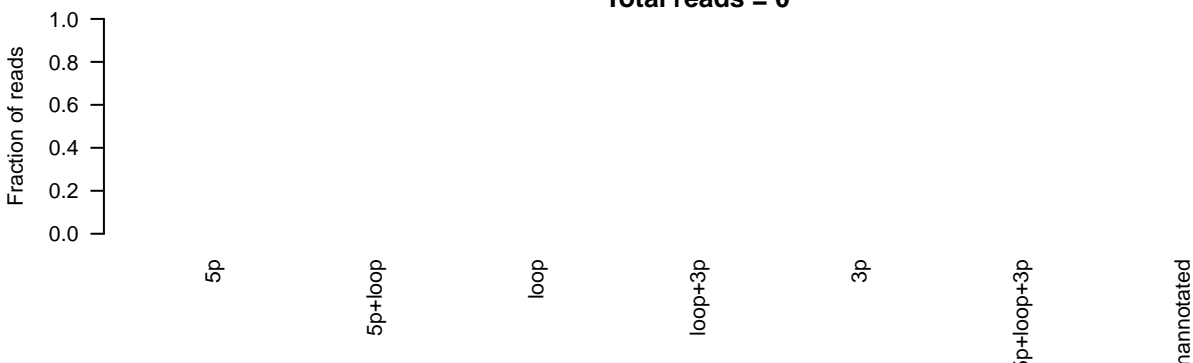



**B) Normal fibroblast miRNA sequencing**  
ID=MI0006392\_1;accession\_number=MI0006392;Name=hsa-mir-1258  
Total reads = 0



**C) PPB Case 14 tumor miRNA sequencing**  
ID=MI0006392\_1;accession\_number=MI0006392;Name=hsa-mir-1258  
Total reads = 0



**D) PPB Case 14 cell line miRNA sequencing**  
ID=MI0006392\_1;accession\_number=MI0006392;Name=hsa-mir-1258  
Total reads = 0



**B) Normal fibroblast miRNA sequencing**  
ID=MI0016778\_1;accession\_number=MI0016778;Name=hsa-mir-4437  
Total reads = 0



**C) PPB Case 14 tumor miRNA sequencing**  
ID=MI0016778\_1;accession\_number=MI0016778;Name=hsa-mir-4437  
Total reads = 0



**D) PPB Case 14 cell line miRNA sequencing**  
ID=MI0016778\_1;accession\_number=MI0016778;Name=hsa-mir-4437  
Total reads = 0



**B) Normal fibroblast miRNA sequencing**  
ID=MI0016779\_1;accession\_number=MI0016779;Name=hsa-mir-548ae-1  
Total reads = 0



**C) PPB Case 14 tumor miRNA sequencing**  
ID=MI0016779\_1;accession\_number=MI0016779;Name=hsa-mir-548ae-1  
Total reads = 0



**D) PPB Case 14 cell line miRNA sequencing**  
ID=MI0016779\_1;accession\_number=MI0016779;Name=hsa-mir-548ae-1  
Total reads = 0



**B) Normal fibroblast miRNA sequencing**  
ID=MI0003567\_1;accession\_number=MI0003567;Name=hsa-mir-561  
Total reads = 0



**C) PPB Case 14 tumor miRNA sequencing**  
ID=MI0003567\_1;accession\_number=MI0003567;Name=hsa-mir-561  
Total reads = 20

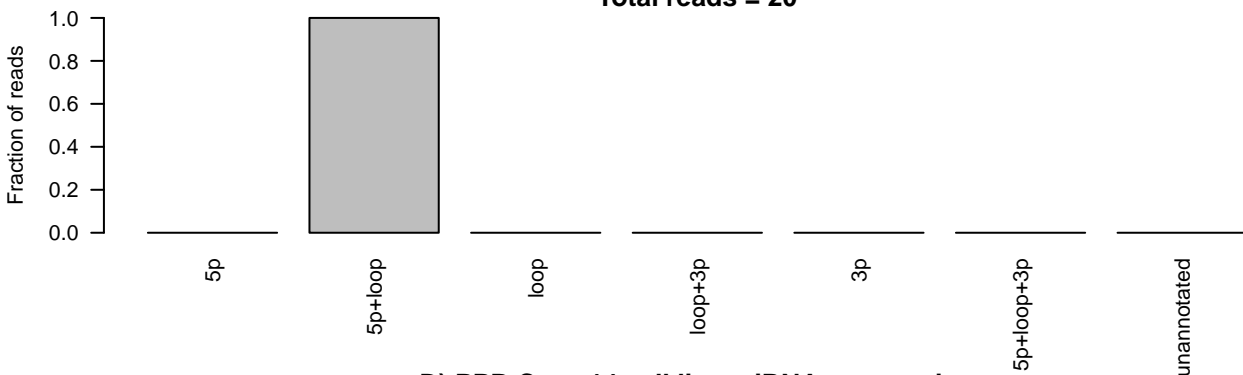

**D) PPB Case 14 cell line miRNA sequencing**  
ID=MI0003567\_1;accession\_number=MI0003567;Name=hsa-mir-561  
Total reads = 1



**B) Normal fibroblast miRNA sequencing**  
ID=MI0006380\_1;accession\_number=MI0006380;Name=hsa-mir-1245a  
Total reads = 0



**C) PPB Case 14 tumor miRNA sequencing**  
ID=MI0006380\_1;accession\_number=MI0006380;Name=hsa-mir-1245a  
Total reads = 0



**D) PPB Case 14 cell line miRNA sequencing**  
ID=MI0006380\_1;accession\_number=MI0006380;Name=hsa-mir-1245a  
Total reads = 0



**B) Normal fibroblast miRNA sequencing**  
ID=MI0017431\_1;accession\_number=MI0017431;Name=hsa-mir-1245b  
Total reads = 0



**C) PPB Case 14 tumor miRNA sequencing**  
ID=MI0017431\_1;accession\_number=MI0017431;Name=hsa-mir-1245b  
Total reads = 0



**D) PPB Case 14 cell line miRNA sequencing**  
ID=MI0017431\_1;accession\_number=MI0017431;Name=hsa-mir-1245b  
Total reads = 0



**B) Normal fibroblast miRNA sequencing**  
ID=MI0015996\_1;accession\_number=MI0015996;Name=hsa-mir-3606  
Total reads = 0



**C) PPB Case 14 tumor miRNA sequencing**  
ID=MI0015996\_1;accession\_number=MI0015996;Name=hsa-mir-3606  
Total reads = 1



**D) PPB Case 14 cell line miRNA sequencing**  
ID=MI0015996\_1;accession\_number=MI0015996;Name=hsa-mir-3606  
Total reads = 0



**B) Normal fibroblast miRNA sequencing**  
ID=MI0014146\_1;accession\_number=MI0014146;Name=hsa-mir-3129  
Total reads = 0



**C) PPB Case 14 tumor miRNA sequencing**  
ID=MI0014146\_1;accession\_number=MI0014146;Name=hsa-mir-3129  
Total reads = 0



**D) PPB Case 14 cell line miRNA sequencing**  
ID=MI0014146\_1;accession\_number=MI0014146;Name=hsa-mir-3129  
Total reads = 0





**B) Normal fibroblast miRNA sequencing**  
ID=MI0014147\_1;accession\_number=MI0014147;Name=hsa-mir-3130-1  
Total reads = 0



**C) PPB Case 14 tumor miRNA sequencing**  
ID=MI0014147\_1;accession\_number=MI0014147;Name=hsa-mir-3130-1  
Total reads = 0



**D) PPB Case 14 cell line miRNA sequencing**  
ID=MI0014147\_1;accession\_number=MI0014147;Name=hsa-mir-3130-1  
Total reads = 0



**B) Normal fibroblast miRNA sequencing**  
ID=MI0014148\_1;accession\_number=MI0014148;Name=hsa-mir-3130-2  
Total reads = 0



**C) PPB Case 14 tumor miRNA sequencing**  
ID=MI0014148\_1;accession\_number=MI0014148;Name=hsa-mir-3130-2  
Total reads = 0



**D) PPB Case 14 cell line miRNA sequencing**  
ID=MI0014148\_1;accession\_number=MI0014148;Name=hsa-mir-3130-2  
Total reads = 0



**B) Normal fibroblast miRNA sequencing**  
ID=MI0015873\_1;accession\_number=MI0015873;Name=hsa-mir-2355  
Total reads = 0



**C) PPB Case 14 tumor miRNA sequencing**  
ID=MI0015873\_1;accession\_number=MI0015873;Name=hsa-mir-2355  
Total reads = 0



**D) PPB Case 14 cell line miRNA sequencing**  
ID=MI0015873\_1;accession\_number=MI0015873;Name=hsa-mir-2355  
Total reads = 0



**B) Normal fibroblast miRNA sequencing**  
ID=MI0006365\_1;accession\_number=MI0006365;Name=hsa-mir-1302-4  
Total reads = 0



**C) PPB Case 14 tumor miRNA sequencing**  
ID=MI0006365\_1;accession\_number=MI0006365;Name=hsa-mir-1302-4  
Total reads = 0



**D) PPB Case 14 cell line miRNA sequencing**  
ID=MI0006365\_1;accession\_number=MI0006365;Name=hsa-mir-1302-4  
Total reads = 0



**B) Normal fibroblast miRNA sequencing**  
ID=MI0017418\_1;accession\_number=MI0017418;Name=hsa-mir-4775  
Total reads = 0



**C) PPB Case 14 tumor miRNA sequencing**  
ID=MI0017418\_1;accession\_number=MI0017418;Name=hsa-mir-4775  
Total reads = 0



**D) PPB Case 14 cell line miRNA sequencing**  
ID=MI0017418\_1;accession\_number=MI0017418;Name=hsa-mir-4775  
Total reads = 0



**B) Normal fibroblast miRNA sequencing**  
ID=MI0006375\_1;accession\_number=MI0006375;Name=hsa-mir-548f-2  
Total reads = 0



**C) PPB Case 14 tumor miRNA sequencing**  
ID=MI0006375\_1;accession\_number=MI0006375;Name=hsa-mir-548f-2  
Total reads = 0



**D) PPB Case 14 cell line miRNA sequencing**  
ID=MI0006375\_1;accession\_number=MI0006375;Name=hsa-mir-548f-2  
Total reads = 0



**B) Normal fibroblast miRNA sequencing**  
ID=MI0017420\_1;accession\_number=MI0017420;Name=hsa-mir-4776-2  
Total reads = 0



**C) PPB Case 14 tumor miRNA sequencing**  
ID=MI0017420\_1;accession\_number=MI0017420;Name=hsa-mir-4776-2  
Total reads = 0



**D) PPB Case 14 cell line miRNA sequencing**  
ID=MI0017420\_1;accession\_number=MI0017420;Name=hsa-mir-4776-2  
Total reads = 0



**B) Normal fibroblast miRNA sequencing**  
ID=MI0017419\_1;accession\_number=MI0017419;Name=hsa-mir-4776-1  
Total reads = 0



**C) PPB Case 14 tumor miRNA sequencing**  
ID=MI0017419\_1;accession\_number=MI0017419;Name=hsa-mir-4776-1  
Total reads = 0



**D) PPB Case 14 cell line miRNA sequencing**  
ID=MI0017419\_1;accession\_number=MI0017419;Name=hsa-mir-4776-1  
Total reads = 0





**B) Normal fibroblast miRNA sequencing**  
ID=MI0016781\_1;accession\_number=MI0016781;Name=hsa-mir-4438  
Total reads = 0



**C) PPB Case 14 tumor miRNA sequencing**  
ID=MI0016781\_1;accession\_number=MI0016781;Name=hsa-mir-4438  
Total reads = 0



**D) PPB Case 14 cell line miRNA sequencing**  
ID=MI0016781\_1;accession\_number=MI0016781;Name=hsa-mir-4438  
Total reads = 0



**B) Normal fibroblast miRNA sequencing**  
ID=MI0022225\_1;accession\_number=MI0022225;Name=hsa-mir-6513  
Total reads = 0



**C) PPB Case 14 tumor miRNA sequencing**  
ID=MI0022225\_1;accession\_number=MI0022225;Name=hsa-mir-6513  
Total reads = 0



**D) PPB Case 14 cell line miRNA sequencing**  
ID=MI0022225\_1;accession\_number=MI0022225;Name=hsa-mir-6513  
Total reads = 0



**B) Normal fibroblast miRNA sequencing**  
ID=MI0000783\_1;accession\_number=MI0000783;Name=hsa-mir-375  
Total reads = 0



**C) PPB Case 14 tumor miRNA sequencing**  
ID=MI0000783\_1;accession\_number=MI0000783;Name=hsa-mir-375  
Total reads = 0



**D) PPB Case 14 cell line miRNA sequencing**  
ID=MI0000783\_1;accession\_number=MI0000783;Name=hsa-mir-375  
Total reads = 0



**B) Normal fibroblast miRNA sequencing**  
ID=MI0014151\_1;accession\_number=MI0014151;Name=hsa-mir-3131  
Total reads = 0



**C) PPB Case 14 tumor miRNA sequencing**  
ID=MI0014151\_1;accession\_number=MI0014151;Name=hsa-mir-3131  
Total reads = 0



**D) PPB Case 14 cell line miRNA sequencing**  
ID=MI0014151\_1;accession\_number=MI0014151;Name=hsa-mir-3131  
Total reads = 0



**B) Normal fibroblast miRNA sequencing**  
ID=MI0000463\_1;accession\_number=MI0000463;Name=hsa-mir-153-1  
Total reads = 0



**C) PPB Case 14 tumor miRNA sequencing**  
ID=MI0000463\_1;accession\_number=MI0000463;Name=hsa-mir-153-1  
Total reads = 0



**D) PPB Case 14 cell line miRNA sequencing**  
ID=MI0000463\_1;accession\_number=MI0000463;Name=hsa-mir-153-1  
Total reads = 0



**B) Normal fibroblast miRNA sequencing**  
ID=MI0014152\_1;accession\_number=MI0014152;Name=hsa-mir-3132  
Total reads = 0



**C) PPB Case 14 tumor miRNA sequencing**  
ID=MI0014152\_1;accession\_number=MI0014152;Name=hsa-mir-3132  
Total reads = 0



**D) PPB Case 14 cell line miRNA sequencing**  
ID=MI0014152\_1;accession\_number=MI0014152;Name=hsa-mir-3132  
Total reads = 0



**B) Normal fibroblast miRNA sequencing**  
ID=MI0015874\_1;accession\_number=MI0015874;Name=hsa-mir-4268  
Total reads = 0



**C) PPB Case 14 tumor miRNA sequencing**  
ID=MI0015874\_1;accession\_number=MI0015874;Name=hsa-mir-4268  
Total reads = 0



**D) PPB Case 14 cell line miRNA sequencing**  
ID=MI0015874\_1;accession\_number=MI0015874;Name=hsa-mir-4268  
Total reads = 0



**B) Normal fibroblast miRNA sequencing**  
ID=MI0016782\_1;accession\_number=MI0016782;Name=hsa-mir-4439  
Total reads = 0



**C) PPB Case 14 tumor miRNA sequencing**  
ID=MI0016782\_1;accession\_number=MI0016782;Name=hsa-mir-4439  
Total reads = 0



**D) PPB Case 14 cell line miRNA sequencing**  
ID=MI0016782\_1;accession\_number=MI0016782;Name=hsa-mir-4439  
Total reads = 0





**B) Normal fibroblast miRNA sequencing**  
ID=MI0019309\_1;accession\_number=MI0019309;Name=hsa-mir-5702  
Total reads = 0



**C) PPB Case 14 tumor miRNA sequencing**  
ID=MI0019309\_1;accession\_number=MI0019309;Name=hsa-mir-5702  
Total reads = 0



**D) PPB Case 14 cell line miRNA sequencing**  
ID=MI0019309\_1;accession\_number=MI0019309;Name=hsa-mir-5702  
Total reads = 0



**B) Normal fibroblast miRNA sequencing**  
ID=MI0019310\_1;accession\_number=MI0019310;Name=hsa-mir-5703  
Total reads = 0



**C) PPB Case 14 tumor miRNA sequencing**  
ID=MI0019310\_1;accession\_number=MI0019310;Name=hsa-mir-5703  
Total reads = 0



**D) PPB Case 14 cell line miRNA sequencing**  
ID=MI0019310\_1;accession\_number=MI0019310;Name=hsa-mir-5703  
Total reads = 0



**B) Normal fibroblast miRNA sequencing**  
ID=MI0017421\_1;accession\_number=MI0017421;Name=hsa-mir-4777  
Total reads = 0



**C) PPB Case 14 tumor miRNA sequencing**  
ID=MI0017421\_1;accession\_number=MI0017421;Name=hsa-mir-4777  
Total reads = 0



**D) PPB Case 14 cell line miRNA sequencing**  
ID=MI0017421\_1;accession\_number=MI0017421;Name=hsa-mir-4777  
Total reads = 0



**B) Normal fibroblast miRNA sequencing**  
ID=MI0015975\_1;accession\_number=MI0015975;Name=hsa-mir-1244-3  
Total reads = 0



**C) PPB Case 14 tumor miRNA sequencing**  
ID=MI0015975\_1;accession\_number=MI0015975;Name=hsa-mir-1244-3  
Total reads = 0



**D) PPB Case 14 cell line miRNA sequencing**  
ID=MI0015975\_1;accession\_number=MI0015975;Name=hsa-mir-1244-3  
Total reads = 0



**B) Normal fibroblast miRNA sequencing**  
ID=MI0007076\_1;accession\_number=MI0007076;Name=hsa-mir-1471  
Total reads = 0



**C) PPB Case 14 tumor miRNA sequencing**  
ID=MI0007076\_1;accession\_number=MI0007076;Name=hsa-mir-1471  
Total reads = 0



**D) PPB Case 14 cell line miRNA sequencing**  
ID=MI0007076\_1;accession\_number=MI0007076;Name=hsa-mir-1471  
Total reads = 0



**B) Normal fibroblast miRNA sequencing**  
ID=MI0003568\_1;accession\_number=MI0003568;Name=hsa-mir-562  
Total reads = 0



**C) PPB Case 14 tumor miRNA sequencing**  
ID=MI0003568\_1;accession\_number=MI0003568;Name=hsa-mir-562  
Total reads = 0



**D) PPB Case 14 cell line miRNA sequencing**  
ID=MI0003568\_1;accession\_number=MI0003568;Name=hsa-mir-562  
Total reads = 0



**B) Normal fibroblast miRNA sequencing**  
ID=MI0017867\_1;accession\_number=MI0017867;Name=hsa-mir-5001  
Total reads = 0



**C) PPB Case 14 tumor miRNA sequencing**  
ID=MI0017867\_1;accession\_number=MI0017867;Name=hsa-mir-5001  
Total reads = 0



**D) PPB Case 14 cell line miRNA sequencing**  
ID=MI0017867\_1;accession\_number=MI0017867;Name=hsa-mir-5001  
Total reads = 0



**B) Normal fibroblast miRNA sequencing**  
ID=MI0016783\_1;accession\_number=MI0016783;Name=hsa-mir-4440  
Total reads = 0



**C) PPB Case 14 tumor miRNA sequencing**  
ID=MI0016783\_1;accession\_number=MI0016783;Name=hsa-mir-4440  
Total reads = 0



**D) PPB Case 14 cell line miRNA sequencing**  
ID=MI0016783\_1;accession\_number=MI0016783;Name=hsa-mir-4440  
Total reads = 0





**B) Normal fibroblast miRNA sequencing**  
ID=MI0016784\_1;accession\_number=MI0016784;Name=hsa-mir-4441  
Total reads = 0



**C) PPB Case 14 tumor miRNA sequencing**  
ID=MI0016784\_1;accession\_number=MI0016784;Name=hsa-mir-4441  
Total reads = 0



**D) PPB Case 14 cell line miRNA sequencing**  
ID=MI0016784\_1;accession\_number=MI0016784;Name=hsa-mir-4441  
Total reads = 0



**B) Normal fibroblast miRNA sequencing**  
ID=MI0015875\_1;accession\_number=MI0015875;Name=hsa-mir-4269  
Total reads = 0



**C) PPB Case 14 tumor miRNA sequencing**  
ID=MI0015875\_1;accession\_number=MI0015875;Name=hsa-mir-4269  
Total reads = 0



**D) PPB Case 14 cell line miRNA sequencing**  
ID=MI0015875\_1;accession\_number=MI0015875;Name=hsa-mir-4269  
Total reads = 0



**B) Normal fibroblast miRNA sequencing**  
ID=MI0017433\_1;accession\_number=MI0017433;Name=hsa-mir-4786  
Total reads = 0



**C) PPB Case 14 tumor miRNA sequencing**  
ID=MI0017433\_1;accession\_number=MI0017433;Name=hsa-mir-4786  
Total reads = 1



**D) PPB Case 14 cell line miRNA sequencing**  
ID=MI0017433\_1;accession\_number=MI0017433;Name=hsa-mir-4786  
Total reads = 0



**B) Normal fibroblast miRNA sequencing**  
ID=MI0014153\_1;accession\_number=MI0014153;Name=hsa-mir-3133  
Total reads = 0



**C) PPB Case 14 tumor miRNA sequencing**  
ID=MI0014153\_1;accession\_number=MI0014153;Name=hsa-mir-3133  
Total reads = 0



**D) PPB Case 14 cell line miRNA sequencing**  
ID=MI0014153\_1;accession\_number=MI0014153;Name=hsa-mir-3133  
Total reads = 0



**B) Normal fibroblast miRNA sequencing**  
ID=MI0014237\_1;accession\_number=MI0014237;Name=hsa-mir-3192  
Total reads = 0



**C) PPB Case 14 tumor miRNA sequencing**  
ID=MI0014237\_1;accession\_number=MI0014237;Name=hsa-mir-3192  
Total reads = 0



**D) PPB Case 14 cell line miRNA sequencing**  
ID=MI0014237\_1;accession\_number=MI0014237;Name=hsa-mir-3192  
Total reads = 0



**B) Normal fibroblast miRNA sequencing**  
ID=MI0008193\_1;accession\_number=MI0008193;Name=hsa-mir-1825  
Total reads = 0



**C) PPB Case 14 tumor miRNA sequencing**  
ID=MI0008193\_1;accession\_number=MI0008193;Name=hsa-mir-1825  
Total reads = 0



**D) PPB Case 14 cell line miRNA sequencing**  
ID=MI0008193\_1;accession\_number=MI0008193;Name=hsa-mir-1825  
Total reads = 0



**B) Normal fibroblast miRNA sequencing**  
ID=MI0017395\_1;accession\_number=MI0017395;Name=hsa-mir-4755  
Total reads = 0



**C) PPB Case 14 tumor miRNA sequencing**  
ID=MI0017395\_1;accession\_number=MI0017395;Name=hsa-mir-4755  
Total reads = 0



**D) PPB Case 14 cell line miRNA sequencing**  
ID=MI0017395\_1;accession\_number=MI0017395;Name=hsa-mir-4755  
Total reads = 0



**B) Normal fibroblast miRNA sequencing**  
ID=MI0003659\_1;accession\_number=MI0003659;Name=hsa-mir-644a  
Total reads = 0



**C) PPB Case 14 tumor miRNA sequencing**  
ID=MI0003659\_1;accession\_number=MI0003659;Name=hsa-mir-644a  
Total reads = 0



**D) PPB Case 14 cell line miRNA sequencing**  
ID=MI0003659\_1;accession\_number=MI0003659;Name=hsa-mir-644a  
Total reads = 0





**B) Normal fibroblast miRNA sequencing**  
ID=MI0003183\_1;accession\_number=MI0003183;Name=hsa-mir-499a  
Total reads = 0



**C) PPB Case 14 tumor miRNA sequencing**  
ID=MI0003183\_1;accession\_number=MI0003183;Name=hsa-mir-499a  
Total reads = 0



**D) PPB Case 14 cell line miRNA sequencing**  
ID=MI0003183\_1;accession\_number=MI0003183;Name=hsa-mir-499a  
Total reads = 0



**B) Normal fibroblast miRNA sequencing**  
ID=MI0017396\_1;accession\_number=MI0017396;Name=hsa-mir-499b  
Total reads = 0



**C) PPB Case 14 tumor miRNA sequencing**  
ID=MI0017396\_1;accession\_number=MI0017396;Name=hsa-mir-499b  
Total reads = 0



**D) PPB Case 14 cell line miRNA sequencing**  
ID=MI0017396\_1;accession\_number=MI0017396;Name=hsa-mir-499b  
Total reads = 0



**B) Normal fibroblast miRNA sequencing**  
ID=MI0006350\_1;accession\_number=MI0006350;Name=hsa-mir-1289-1  
Total reads = 0



**C) PPB Case 14 tumor miRNA sequencing**  
ID=MI0006350\_1;accession\_number=MI0006350;Name=hsa-mir-1289-1  
Total reads = 0



**D) PPB Case 14 cell line miRNA sequencing**  
ID=MI0006350\_1;accession\_number=MI0006350;Name=hsa-mir-1289-1  
Total reads = 0



**B) Normal fibroblast miRNA sequencing**  
ID=MI0016046\_1;accession\_number=MI0016046;Name=hsa-mir-3646  
Total reads = 0



**C) PPB Case 14 tumor miRNA sequencing**  
ID=MI0016046\_1;accession\_number=MI0016046;Name=hsa-mir-3646  
Total reads = 0



**D) PPB Case 14 cell line miRNA sequencing**  
ID=MI0016046\_1;accession\_number=MI0016046;Name=hsa-mir-3646  
Total reads = 0



**B) Normal fibroblast miRNA sequencing**  
ID=MI0016007\_1;accession\_number=MI0016007;Name=hsa-mir-3617  
Total reads = 0



**C) PPB Case 14 tumor miRNA sequencing**  
ID=MI0016007\_1;accession\_number=MI0016007;Name=hsa-mir-3617  
Total reads = 0



**D) PPB Case 14 cell line miRNA sequencing**  
ID=MI0016007\_1;accession\_number=MI0016007;Name=hsa-mir-3617  
Total reads = 0



**B) Normal fibroblast miRNA sequencing**  
ID=MI0016006\_1;accession\_number=MI0016006;Name=hsa-mir-3616  
Total reads = 0



**C) PPB Case 14 tumor miRNA sequencing**  
ID=MI0016006\_1;accession\_number=MI0016006;Name=hsa-mir-3616  
Total reads = 0



**D) PPB Case 14 cell line miRNA sequencing**  
ID=MI0016006\_1;accession\_number=MI0016006;Name=hsa-mir-3616  
Total reads = 0



**B) Normal fibroblast miRNA sequencing**  
ID=MI0003660\_1;accession\_number=MI0003660;Name=hsa-mir-645  
Total reads = 0



**C) PPB Case 14 tumor miRNA sequencing**  
ID=MI0003660\_1;accession\_number=MI0003660;Name=hsa-mir-645  
Total reads = 0



**D) PPB Case 14 cell line miRNA sequencing**  
ID=MI0003660\_1;accession\_number=MI0003660;Name=hsa-mir-645  
Total reads = 0



**B) Normal fibroblast miRNA sequencing**  
ID=MI0006366\_1;accession\_number=MI0006366;Name=hsa-mir-1302-5  
Total reads = 0



**C) PPB Case 14 tumor miRNA sequencing**  
ID=MI0006366\_1;accession\_number=MI0006366;Name=hsa-mir-1302-5  
Total reads = 0



**D) PPB Case 14 cell line miRNA sequencing**  
ID=MI0006366\_1;accession\_number=MI0006366;Name=hsa-mir-1302-5  
Total reads = 0





**B) Normal fibroblast miRNA sequencing**  
ID=MI0017397\_1;accession\_number=MI0017397;Name=hsa-mir-4756  
Total reads = 0



**C) PPB Case 14 tumor miRNA sequencing**  
ID=MI0017397\_1;accession\_number=MI0017397;Name=hsa-mir-4756  
Total reads = 0



**D) PPB Case 14 cell line miRNA sequencing**  
ID=MI0017397\_1;accession\_number=MI0017397;Name=hsa-mir-4756  
Total reads = 0



**B) Normal fibroblast miRNA sequencing**  
ID=MI0015865\_1;accession\_number=MI0015865;Name=hsa-mir-4325  
Total reads = 0



**C) PPB Case 14 tumor miRNA sequencing**  
ID=MI0015865\_1;accession\_number=MI0015865;Name=hsa-mir-4325  
Total reads = 0



**D) PPB Case 14 cell line miRNA sequencing**  
ID=MI0015865\_1;accession\_number=MI0015865;Name=hsa-mir-4325  
Total reads = 0



**B) Normal fibroblast miRNA sequencing**  
ID=MI0016899\_1;accession\_number=MI0016899;Name=hsa-mir-4532  
Total reads = 0



**C) PPB Case 14 tumor miRNA sequencing**  
ID=MI0016899\_1;accession\_number=MI0016899;Name=hsa-mir-4532  
Total reads = 0



**D) PPB Case 14 cell line miRNA sequencing**  
ID=MI0016899\_1;accession\_number=MI0016899;Name=hsa-mir-4532  
Total reads = 0



**B) Normal fibroblast miRNA sequencing**  
ID=MI0005523\_1;accession\_number=MI0005523;Name=hsa-mir-298  
Total reads = 0



**C) PPB Case 14 tumor miRNA sequencing**  
ID=MI0005523\_1;accession\_number=MI0005523;Name=hsa-mir-298  
Total reads = 0



**D) PPB Case 14 cell line miRNA sequencing**  
ID=MI0005523\_1;accession\_number=MI0005523;Name=hsa-mir-298  
Total reads = 0



**B) Normal fibroblast miRNA sequencing**  
ID=MI0003661\_1;accession\_number=MI0003661;Name=hsa-mir-646  
Total reads = 0



**C) PPB Case 14 tumor miRNA sequencing**  
ID=MI0003661\_1;accession\_number=MI0003661;Name=hsa-mir-646  
Total reads = 0



**D) PPB Case 14 cell line miRNA sequencing**  
ID=MI0003661\_1;accession\_number=MI0003661;Name=hsa-mir-646  
Total reads = 0



**B) Normal fibroblast miRNA sequencing**  
ID=MI0016900\_1;accession\_number=MI0016900;Name=hsa-mir-4533  
Total reads = 0



**C) PPB Case 14 tumor miRNA sequencing**  
ID=MI0016900\_1;accession\_number=MI0016900;Name=hsa-mir-4533  
Total reads = 0



**D) PPB Case 14 cell line miRNA sequencing**  
ID=MI0016900\_1;accession\_number=MI0016900;Name=hsa-mir-4533  
Total reads = 0



**B) Normal fibroblast miRNA sequencing**  
ID=MI0016794\_1;accession\_number=MI0016794;Name=hsa-mir-548ag-2  
Total reads = 0



**C) PPB Case 14 tumor miRNA sequencing**  
ID=MI0016794\_1;accession\_number=MI0016794;Name=hsa-mir-548ag-2  
Total reads = 0



**D) PPB Case 14 cell line miRNA sequencing**  
ID=MI0016794\_1;accession\_number=MI0016794;Name=hsa-mir-548ag-2  
Total reads = 0



**B) Normal fibroblast miRNA sequencing**  
ID=MI0006391\_1;accession\_number=MI0006391;Name=hsa-mir-1257  
Total reads = 0



**C) PPB Case 14 tumor miRNA sequencing**  
ID=MI0006391\_1;accession\_number=MI0006391;Name=hsa-mir-1257  
Total reads = 0



**D) PPB Case 14 cell line miRNA sequencing**  
ID=MI0006391\_1;accession\_number=MI0006391;Name=hsa-mir-1257  
Total reads = 0





**B) Normal fibroblast miRNA sequencing**  
ID=MI0014240\_1;accession\_number=MI0014240;Name=hsa-mir-3195  
Total reads = 0



**C) PPB Case 14 tumor miRNA sequencing**  
ID=MI0014240\_1;accession\_number=MI0014240;Name=hsa-mir-3195  
Total reads = 0



**D) PPB Case 14 cell line miRNA sequencing**  
ID=MI0014240\_1;accession\_number=MI0014240;Name=hsa-mir-3195  
Total reads = 0



**B) Normal fibroblast miRNA sequencing**  
ID=MI0017399\_1;accession\_number=MI0017399;Name=hsa-mir-4758  
Total reads = 0



**C) PPB Case 14 tumor miRNA sequencing**  
ID=MI0017399\_1;accession\_number=MI0017399;Name=hsa-mir-4758  
Total reads = 0



**D) PPB Case 14 cell line miRNA sequencing**  
ID=MI0017399\_1;accession\_number=MI0017399;Name=hsa-mir-4758  
Total reads = 0



**B) Normal fibroblast miRNA sequencing**  
ID=MI0000451\_1;accession\_number=MI0000451;Name=hsa-mir-133a-2  
Total reads = 0



**C) PPB Case 14 tumor miRNA sequencing**  
ID=MI0000451\_1;accession\_number=MI0000451;Name=hsa-mir-133a-2  
Total reads = 12

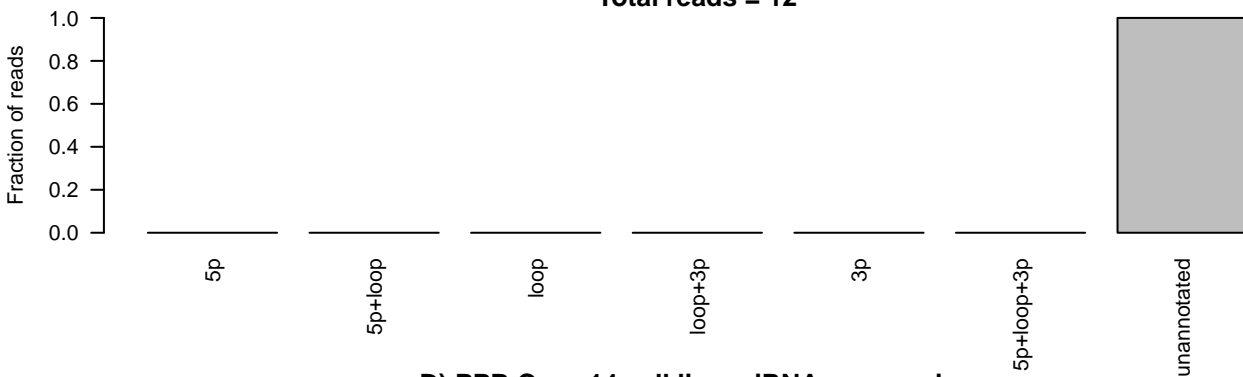

**D) PPB Case 14 cell line miRNA sequencing**  
ID=MI0000451\_1;accession\_number=MI0000451;Name=hsa-mir-133a-2  
Total reads = 0



**B) Normal fibroblast miRNA sequencing**  
ID=MI0000445\_1;accession\_number=MI0000445;Name=hsa-mir-124-3  
Total reads = 0



**C) PPB Case 14 tumor miRNA sequencing**  
ID=MI0000445\_1;accession\_number=MI0000445;Name=hsa-mir-124-3  
Total reads = 0



**D) PPB Case 14 cell line miRNA sequencing**  
ID=MI0000445\_1;accession\_number=MI0000445;Name=hsa-mir-124-3  
Total reads = 0



**B) Normal fibroblast miRNA sequencing**  
ID=MI0014241\_1;accession\_number=MI0014241;Name=hsa-mir-3196  
Total reads = 0



**C) PPB Case 14 tumor miRNA sequencing**  
ID=MI0014241\_1;accession\_number=MI0014241;Name=hsa-mir-3196  
Total reads = 0



**D) PPB Case 14 cell line miRNA sequencing**  
ID=MI0014241\_1;accession\_number=MI0014241;Name=hsa-mir-3196  
Total reads = 0



**B) Normal fibroblast miRNA sequencing**  
ID=MI0015866\_1;accession\_number=MI0015866;Name=hsa-mir-4326  
Total reads = 0



**C) PPB Case 14 tumor miRNA sequencing**  
ID=MI0015866\_1;accession\_number=MI0015866;Name=hsa-mir-4326  
Total reads = 0



**D) PPB Case 14 cell line miRNA sequencing**  
ID=MI0015866\_1;accession\_number=MI0015866;Name=hsa-mir-4326  
Total reads = 0



**B) Normal fibroblast miRNA sequencing**  
ID=MI0008335\_1;accession\_number=MI0008335;Name=hsa-mir-1914  
Total reads = 0



**C) PPB Case 14 tumor miRNA sequencing**  
ID=MI0008335\_1;accession\_number=MI0008335;Name=hsa-mir-1914  
Total reads = 0



**D) PPB Case 14 cell line miRNA sequencing**  
ID=MI0008335\_1;accession\_number=MI0008335;Name=hsa-mir-1914  
Total reads = 0



**B) Normal fibroblast miRNA sequencing**  
ID=MI0003662\_1;accession\_number=MI0003662;Name=hsa-mir-647  
Total reads = 0



**C) PPB Case 14 tumor miRNA sequencing**  
ID=MI0003662\_1;accession\_number=MI0003662;Name=hsa-mir-647  
Total reads = 0



**D) PPB Case 14 cell line miRNA sequencing**  
ID=MI0003662\_1;accession\_number=MI0003662;Name=hsa-mir-647  
Total reads = 0





**B) Normal fibroblast miRNA sequencing**  
ID=MI0016088\_1;accession\_number=MI0016088;Name=hsa-mir-3687  
Total reads = 0



**C) PPB Case 14 tumor miRNA sequencing**  
ID=MI0016088\_1;accession\_number=MI0016088;Name=hsa-mir-3687  
Total reads = 1



**D) PPB Case 14 cell line miRNA sequencing**  
ID=MI0016088\_1;accession\_number=MI0016088;Name=hsa-mir-3687  
Total reads = 0



**B) Normal fibroblast miRNA sequencing**  
ID=MI0014242\_1;accession\_number=MI0014242;Name=hsa-mir-3156-3  
Total reads = 0



**C) PPB Case 14 tumor miRNA sequencing**  
ID=MI0014242\_1;accession\_number=MI0014242;Name=hsa-mir-3156-3  
Total reads = 0



**D) PPB Case 14 cell line miRNA sequencing**  
ID=MI0014242\_1;accession\_number=MI0014242;Name=hsa-mir-3156-3  
Total reads = 0



**B) Normal fibroblast miRNA sequencing**  
ID=MI0014243\_1;accession\_number=MI0014243;Name=hsa-mir-3118-5  
Total reads = 0



**C) PPB Case 14 tumor miRNA sequencing**  
ID=MI0014243\_1;accession\_number=MI0014243;Name=hsa-mir-3118-5  
Total reads = 0



**D) PPB Case 14 cell line miRNA sequencing**  
ID=MI0014243\_1;accession\_number=MI0014243;Name=hsa-mir-3118-5  
Total reads = 0



**B) Normal fibroblast miRNA sequencing**  
ID=MI0014244\_1;accession\_number=MI0014244;Name=hsa-mir-548x  
Total reads = 0



**C) PPB Case 14 tumor miRNA sequencing**  
ID=MI0014244\_1;accession\_number=MI0014244;Name=hsa-mir-548x  
Total reads = 0



**D) PPB Case 14 cell line miRNA sequencing**  
ID=MI0014244\_1;accession\_number=MI0014244;Name=hsa-mir-548x  
Total reads = 0



**B) Normal fibroblast miRNA sequencing**  
ID=MI0021275\_1;accession\_number=MI0021275;Name=hsa-mir-6130  
Total reads = 0



**C) PPB Case 14 tumor miRNA sequencing**  
ID=MI0021275\_1;accession\_number=MI0021275;Name=hsa-mir-6130  
Total reads = 0



**D) PPB Case 14 cell line miRNA sequencing**  
ID=MI0021275\_1;accession\_number=MI0021275;Name=hsa-mir-6130  
Total reads = 0



**B) Normal fibroblast miRNA sequencing**  
ID=MI0017400\_1;accession\_number=MI0017400;Name=hsa-mir-4759  
Total reads = 0



**C) PPB Case 14 tumor miRNA sequencing**  
ID=MI0017400\_1;accession\_number=MI0017400;Name=hsa-mir-4759  
Total reads = 0



**D) PPB Case 14 cell line miRNA sequencing**  
ID=MI0017400\_1;accession\_number=MI0017400;Name=hsa-mir-4759  
Total reads = 0



**B) Normal fibroblast miRNA sequencing**  
ID=MI0015867\_1;accession\_number=MI0015867;Name=hsa-mir-4327  
Total reads = 0



**C) PPB Case 14 tumor miRNA sequencing**  
ID=MI0015867\_1;accession\_number=MI0015867;Name=hsa-mir-4327  
Total reads = 0



**D) PPB Case 14 cell line miRNA sequencing**  
ID=MI0015867\_1;accession\_number=MI0015867;Name=hsa-mir-4327  
Total reads = 0



**B) Normal fibroblast miRNA sequencing**  
ID=MI0022213\_1;accession\_number=MI0022213;Name=hsa-mir-6501  
Total reads = 0



**C) PPB Case 14 tumor miRNA sequencing**  
ID=MI0022213\_1;accession\_number=MI0022213;Name=hsa-mir-6501  
Total reads = 0



**D) PPB Case 14 cell line miRNA sequencing**  
ID=MI0022213\_1;accession\_number=MI0022213;Name=hsa-mir-6501  
Total reads = 0





**B) Normal fibroblast miRNA sequencing**  
ID=MI0003906\_1;accession\_number=MI0003906;Name=hsa-mir-802  
Total reads = 0



**C) PPB Case 14 tumor miRNA sequencing**  
ID=MI0003906\_1;accession\_number=MI0003906;Name=hsa-mir-802  
Total reads = 0



**D) PPB Case 14 cell line miRNA sequencing**  
ID=MI0003906\_1;accession\_number=MI0003906;Name=hsa-mir-802  
Total reads = 0



**B) Normal fibroblast miRNA sequencing**  
ID=MI0022220\_1;accession\_number=MI0022220;Name=hsa-mir-6508  
Total reads = 0



**C) PPB Case 14 tumor miRNA sequencing**  
ID=MI0022220\_1;accession\_number=MI0022220;Name=hsa-mir-6508  
Total reads = 0



**D) PPB Case 14 cell line miRNA sequencing**  
ID=MI0022220\_1;accession\_number=MI0022220;Name=hsa-mir-6508  
Total reads = 0



**B) Normal fibroblast miRNA sequencing**  
ID=MI0017401\_1;accession\_number=MI0017401;Name=hsa-mir-4760  
Total reads = 0



**C) PPB Case 14 tumor miRNA sequencing**  
ID=MI0017401\_1;accession\_number=MI0017401;Name=hsa-mir-4760  
Total reads = 0



**D) PPB Case 14 cell line miRNA sequencing**  
ID=MI0017401\_1;accession\_number=MI0017401;Name=hsa-mir-4760  
Total reads = 0



**B) Normal fibroblast miRNA sequencing**  
ID=MI0014245\_1;accession\_number=MI0014245;Name=hsa-mir-3197  
Total reads = 0



**C) PPB Case 14 tumor miRNA sequencing**  
ID=MI0014245\_1;accession\_number=MI0014245;Name=hsa-mir-3197  
Total reads = 0



**D) PPB Case 14 cell line miRNA sequencing**  
ID=MI0014245\_1;accession\_number=MI0014245;Name=hsa-mir-3197  
Total reads = 0



**B) Normal fibroblast miRNA sequencing**  
ID=MI0019311\_1;accession\_number=MI0019311;Name=hsa-mir-5692b  
Total reads = 0



**C) PPB Case 14 tumor miRNA sequencing**  
ID=MI0019311\_1;accession\_number=MI0019311;Name=hsa-mir-5692b  
Total reads = 0



**D) PPB Case 14 cell line miRNA sequencing**  
ID=MI0019311\_1;accession\_number=MI0019311;Name=hsa-mir-5692b  
Total reads = 0



**B) Normal fibroblast miRNA sequencing**  
ID=MI0020347\_1;accession\_number=MI0020347;Name=hsa-mir-6070  
Total reads = 0



**C) PPB Case 14 tumor miRNA sequencing**  
ID=MI0020347\_1;accession\_number=MI0020347;Name=hsa-mir-6070  
Total reads = 0



**D) PPB Case 14 cell line miRNA sequencing**  
ID=MI0020347\_1;accession\_number=MI0020347;Name=hsa-mir-6070  
Total reads = 0



**B) Normal fibroblast miRNA sequencing**  
ID=MI0014246\_1;accession\_number=MI0014246;Name=hsa-mir-3198-1  
Total reads = 0



**C) PPB Case 14 tumor miRNA sequencing**  
ID=MI0014246\_1;accession\_number=MI0014246;Name=hsa-mir-3198-1  
Total reads = 0



**D) PPB Case 14 cell line miRNA sequencing**  
ID=MI0014246\_1;accession\_number=MI0014246;Name=hsa-mir-3198-1  
Total reads = 0



**B) Normal fibroblast miRNA sequencing**  
ID=MI0003663\_1;accession\_number=MI0003663;Name=hsa-mir-648  
Total reads = 0



**C) PPB Case 14 tumor miRNA sequencing**  
ID=MI0003663\_1;accession\_number=MI0003663;Name=hsa-mir-648  
Total reads = 0



**D) PPB Case 14 cell line miRNA sequencing**  
ID=MI0003663\_1;accession\_number=MI0003663;Name=hsa-mir-648  
Total reads = 0





**B) Normal fibroblast miRNA sequencing**  
ID=MI0017402\_1;accession\_number=MI0017402;Name=hsa-mir-4761  
Total reads = 0



**C) PPB Case 14 tumor miRNA sequencing**  
ID=MI0017402\_1;accession\_number=MI0017402;Name=hsa-mir-4761  
Total reads = 0



**D) PPB Case 14 cell line miRNA sequencing**  
ID=MI0017402\_1;accession\_number=MI0017402;Name=hsa-mir-4761  
Total reads = 0



**B) Normal fibroblast miRNA sequencing**  
ID=MI0006443\_1;accession\_number=MI0006443;Name=hsa-mir-1306  
Total reads = 0



**C) PPB Case 14 tumor miRNA sequencing**  
ID=MI0006443\_1;accession\_number=MI0006443;Name=hsa-mir-1306  
Total reads = 1



**D) PPB Case 14 cell line miRNA sequencing**  
ID=MI0006443\_1;accession\_number=MI0006443;Name=hsa-mir-1306  
Total reads = 0



**B) Normal fibroblast miRNA sequencing**  
ID=MI0006348\_1;accession\_number=MI0006348;Name=hsa-mir-1286  
Total reads = 0



**C) PPB Case 14 tumor miRNA sequencing**  
ID=MI0006348\_1;accession\_number=MI0006348;Name=hsa-mir-1286  
Total reads = 0



**D) PPB Case 14 cell line miRNA sequencing**  
ID=MI0006348\_1;accession\_number=MI0006348;Name=hsa-mir-1286  
Total reads = 0



**B) Normal fibroblast miRNA sequencing**  
ID=MI0003664\_1;accession\_number=MI0003664;Name=hsa-mir-649  
Total reads = 0



**C) PPB Case 14 tumor miRNA sequencing**  
ID=MI0003664\_1;accession\_number=MI0003664;Name=hsa-mir-649  
Total reads = 0



**D) PPB Case 14 cell line miRNA sequencing**  
ID=MI0003664\_1;accession\_number=MI0003664;Name=hsa-mir-649  
Total reads = 0



**B) Normal fibroblast miRNA sequencing**  
ID=MI0003665\_1;accession\_number=MI0003665;Name=hsa-mir-650  
Total reads = 0



**C) PPB Case 14 tumor miRNA sequencing**  
ID=MI0003665\_1;accession\_number=MI0003665;Name=hsa-mir-650  
Total reads = 0



**D) PPB Case 14 cell line miRNA sequencing**  
ID=MI0003665\_1;accession\_number=MI0003665;Name=hsa-mir-650  
Total reads = 0



**B) Normal fibroblast miRNA sequencing**  
ID=MI0019115\_1;accession\_number=MI0019115;Name=hsa-mir-5571  
Total reads = 0



**C) PPB Case 14 tumor miRNA sequencing**  
ID=MI0019115\_1;accession\_number=MI0019115;Name=hsa-mir-5571  
Total reads = 0



**D) PPB Case 14 cell line miRNA sequencing**  
ID=MI0019115\_1;accession\_number=MI0019115;Name=hsa-mir-5571  
Total reads = 0



**B) Normal fibroblast miRNA sequencing**  
ID=MI0006345\_1;accession\_number=MI0006345;Name=hsa-mir-548j  
Total reads = 0



**C) PPB Case 14 tumor miRNA sequencing**  
ID=MI0006345\_1;accession\_number=MI0006345;Name=hsa-mir-548j  
Total reads = 0



**D) PPB Case 14 cell line miRNA sequencing**  
ID=MI0006345\_1;accession\_number=MI0006345;Name=hsa-mir-548j  
Total reads = 0



**B) Normal fibroblast miRNA sequencing**  
ID=MI0014247\_1;accession\_number=MI0014247;Name=hsa-mir-3199-1  
Total reads = 0



**C) PPB Case 14 tumor miRNA sequencing**  
ID=MI0014247\_1;accession\_number=MI0014247;Name=hsa-mir-3199-1  
Total reads = 0



**D) PPB Case 14 cell line miRNA sequencing**  
ID=MI0014247\_1;accession\_number=MI0014247;Name=hsa-mir-3199-1  
Total reads = 0





**B) Normal fibroblast miRNA sequencing**  
ID=MI0014248\_1;accession\_number=MI0014248;Name=hsa-mir-3199-2  
Total reads = 0



**C) PPB Case 14 tumor miRNA sequencing**  
ID=MI0014248\_1;accession\_number=MI0014248;Name=hsa-mir-3199-2  
Total reads = 0



**D) PPB Case 14 cell line miRNA sequencing**  
ID=MI0014248\_1;accession\_number=MI0014248;Name=hsa-mir-3199-2  
Total reads = 0



**B) Normal fibroblast miRNA sequencing**  
ID=MI0019412\_1;accession\_number=MI0019412;Name=hsa-mir-5739  
Total reads = 0



**C) PPB Case 14 tumor miRNA sequencing**  
ID=MI0019412\_1;accession\_number=MI0019412;Name=hsa-mir-5739  
Total reads = 0



**D) PPB Case 14 cell line miRNA sequencing**  
ID=MI0019412\_1;accession\_number=MI0019412;Name=hsa-mir-5739  
Total reads = 0



**B) Normal fibroblast miRNA sequencing**  
ID=MI0016438\_1;accession\_number=MI0016438;Name=hsa-mir-3928  
Total reads = 0



**C) PPB Case 14 tumor miRNA sequencing**  
ID=MI0016438\_1;accession\_number=MI0016438;Name=hsa-mir-3928  
Total reads = 0



**D) PPB Case 14 cell line miRNA sequencing**  
ID=MI0016438\_1;accession\_number=MI0016438;Name=hsa-mir-3928  
Total reads = 0



**B) Normal fibroblast miRNA sequencing**  
ID=MI0017405\_1;accession\_number=MI0017405;Name=hsa-mir-4764  
Total reads = 0



**C) PPB Case 14 tumor miRNA sequencing**  
ID=MI0017405\_1;accession\_number=MI0017405;Name=hsa-mir-4764  
Total reads = 0



**D) PPB Case 14 cell line miRNA sequencing**  
ID=MI0017405\_1;accession\_number=MI0017405;Name=hsa-mir-4764  
Total reads = 0



**B) Normal fibroblast miRNA sequencing**  
ID=MI0016413\_1;accession\_number=MI0016413;Name=hsa-mir-3909  
Total reads = 0



**C) PPB Case 14 tumor miRNA sequencing**  
ID=MI0016413\_1;accession\_number=MI0016413;Name=hsa-mir-3909  
Total reads = 0



**D) PPB Case 14 cell line miRNA sequencing**  
ID=MI0016413\_1;accession\_number=MI0016413;Name=hsa-mir-3909  
Total reads = 0



**B) Normal fibroblast miRNA sequencing**  
ID=MI0020346\_1;accession\_number=MI0020346;Name=hsa-mir-6069  
Total reads = 0



**C) PPB Case 14 tumor miRNA sequencing**  
ID=MI0020346\_1;accession\_number=MI0020346;Name=hsa-mir-6069  
Total reads = 0



**D) PPB Case 14 cell line miRNA sequencing**  
ID=MI0020346\_1;accession\_number=MI0020346;Name=hsa-mir-6069  
Total reads = 0



**B) Normal fibroblast miRNA sequencing**  
ID=MI0003682\_1;accession\_number=MI0003682;Name=hsa-mir-658  
Total reads = 0



**C) PPB Case 14 tumor miRNA sequencing**  
ID=MI0003682\_1;accession\_number=MI0003682;Name=hsa-mir-658  
Total reads = 0



**D) PPB Case 14 cell line miRNA sequencing**  
ID=MI0003682\_1;accession\_number=MI0003682;Name=hsa-mir-658  
Total reads = 0



**B) Normal fibroblast miRNA sequencing**  
ID=MI0003683\_1;accession\_number=MI0003683;Name=hsa-mir-659  
Total reads = 0



**C) PPB Case 14 tumor miRNA sequencing**  
ID=MI0003683\_1;accession\_number=MI0003683;Name=hsa-mir-659  
Total reads = 0



**D) PPB Case 14 cell line miRNA sequencing**  
ID=MI0003683\_1;accession\_number=MI0003683;Name=hsa-mir-659  
Total reads = 0





**B) Normal fibroblast miRNA sequencing**  
ID=MI0016901\_1;accession\_number=MI0016901;Name=hsa-mir-4534  
Total reads = 0



**C) PPB Case 14 tumor miRNA sequencing**  
ID=MI0016901\_1;accession\_number=MI0016901;Name=hsa-mir-4534  
Total reads = 0



**D) PPB Case 14 cell line miRNA sequencing**  
ID=MI0016901\_1;accession\_number=MI0016901;Name=hsa-mir-4534  
Total reads = 0



**B) Normal fibroblast miRNA sequencing**  
ID=MI0017407\_1;accession\_number=MI0017407;Name=hsa-mir-4766  
Total reads = 0



**C) PPB Case 14 tumor miRNA sequencing**  
ID=MI0017407\_1;accession\_number=MI0017407;Name=hsa-mir-4766  
Total reads = 0



**D) PPB Case 14 cell line miRNA sequencing**  
ID=MI0017407\_1;accession\_number=MI0017407;Name=hsa-mir-4766  
Total reads = 0



**B) Normal fibroblast miRNA sequencing**  
ID=MI0006428\_1;accession\_number=MI0006428;Name=hsa-mir-1281  
Total reads = 0



**C) PPB Case 14 tumor miRNA sequencing**  
ID=MI0006428\_1;accession\_number=MI0006428;Name=hsa-mir-1281  
Total reads = 0



**D) PPB Case 14 cell line miRNA sequencing**  
ID=MI0006428\_1;accession\_number=MI0006428;Name=hsa-mir-1281  
Total reads = 0



**B) Normal fibroblast miRNA sequencing**  
ID=MI0016902\_1;accession\_number=MI0016902;Name=hsa-mir-378i  
Total reads = 0



**C) PPB Case 14 tumor miRNA sequencing**  
ID=MI0016902\_1;accession\_number=MI0016902;Name=hsa-mir-378i  
Total reads = 0



**D) PPB Case 14 cell line miRNA sequencing**  
ID=MI0016902\_1;accession\_number=MI0016902;Name=hsa-mir-378i  
Total reads = 0



**B) Normal fibroblast miRNA sequencing**  
ID=MI0006384\_1;accession\_number=MI0006384;Name=hsa-mir-1249  
Total reads = 0



**C) PPB Case 14 tumor miRNA sequencing**  
ID=MI0006384\_1;accession\_number=MI0006384;Name=hsa-mir-1249  
Total reads = 0



**D) PPB Case 14 cell line miRNA sequencing**  
ID=MI0006384\_1;accession\_number=MI0006384;Name=hsa-mir-1249  
Total reads = 0



**B) Normal fibroblast miRNA sequencing**  
ID=MI0017403\_1;accession\_number=MI0017403;Name=hsa-mir-4762  
Total reads = 0



**C) PPB Case 14 tumor miRNA sequencing**  
ID=MI0017403\_1;accession\_number=MI0017403;Name=hsa-mir-4762  
Total reads = 0



**D) PPB Case 14 cell line miRNA sequencing**  
ID=MI0017403\_1;accession\_number=MI0017403;Name=hsa-mir-4762  
Total reads = 0



**B) Normal fibroblast miRNA sequencing**  
ID=MI0016009\_1;accession\_number=MI0016009;Name=hsa-mir-3619  
Total reads = 0



**C) PPB Case 14 tumor miRNA sequencing**  
ID=MI0016009\_1;accession\_number=MI0016009;Name=hsa-mir-3619  
Total reads = 0



**D) PPB Case 14 cell line miRNA sequencing**  
ID=MI0016009\_1;accession\_number=MI0016009;Name=hsa-mir-3619  
Total reads = 0



**B) Normal fibroblast miRNA sequencing**  
ID=MI0017404\_1;accession\_number=MI0017404;Name=hsa-mir-4763  
Total reads = 0



**C) PPB Case 14 tumor miRNA sequencing**  
ID=MI0017404\_1;accession\_number=MI0017404;Name=hsa-mir-4763  
Total reads = 0



**D) PPB Case 14 cell line miRNA sequencing**  
ID=MI0017404\_1;accession\_number=MI0017404;Name=hsa-mir-4763  
Total reads = 0





**B) Normal fibroblast miRNA sequencing**  
ID=MI0014250\_1;accession\_number=MI0014250;Name=hsa-mir-3201  
Total reads = 0



**C) PPB Case 14 tumor miRNA sequencing**  
ID=MI0014250\_1;accession\_number=MI0014250;Name=hsa-mir-3201  
Total reads = 0



**D) PPB Case 14 cell line miRNA sequencing**  
ID=MI0014250\_1;accession\_number=MI0014250;Name=hsa-mir-3201  
Total reads = 0



**B) Normal fibroblast miRNA sequencing**  
ID=MI0016903\_1;accession\_number=MI0016903;Name=hsa-mir-4535  
Total reads = 0



**C) PPB Case 14 tumor miRNA sequencing**  
ID=MI0016903\_1;accession\_number=MI0016903;Name=hsa-mir-4535  
Total reads = 0



**D) PPB Case 14 cell line miRNA sequencing**  
ID=MI0016903\_1;accession\_number=MI0016903;Name=hsa-mir-4535  
Total reads = 0



**B) Normal fibroblast miRNA sequencing**  
ID=MI0016068\_1;accession\_number=MI0016068;Name=hsa-mir-3667  
Total reads = 0



**C) PPB Case 14 tumor miRNA sequencing**  
ID=MI0016068\_1;accession\_number=MI0016068;Name=hsa-mir-3667  
Total reads = 0



**D) PPB Case 14 cell line miRNA sequencing**  
ID=MI0016068\_1;accession\_number=MI0016068;Name=hsa-mir-3667  
Total reads = 0



**B) Normal fibroblast miRNA sequencing**  
ID=MI0017437\_1;accession\_number=MI0017437;Name=hsa-mir-4790  
Total reads = 0



**C) PPB Case 14 tumor miRNA sequencing**  
ID=MI0017437\_1;accession\_number=MI0017437;Name=hsa-mir-4790  
Total reads = 0



**D) PPB Case 14 cell line miRNA sequencing**  
ID=MI0017437\_1;accession\_number=MI0017437;Name=hsa-mir-4790  
Total reads = 0



**B) Normal fibroblast miRNA sequencing**  
ID=MI0014154\_1;accession\_number=MI0014154;Name=hsa-mir-378b  
Total reads = 0



**C) PPB Case 14 tumor miRNA sequencing**  
ID=MI0014154\_1;accession\_number=MI0014154;Name=hsa-mir-378b  
Total reads = 0



**D) PPB Case 14 cell line miRNA sequencing**  
ID=MI0014154\_1;accession\_number=MI0014154;Name=hsa-mir-378b  
Total reads = 0



**B) Normal fibroblast miRNA sequencing**  
ID=MI0005560\_1;accession\_number=MI0005560;Name=hsa-mir-885  
Total reads = 0



**C) PPB Case 14 tumor miRNA sequencing**  
ID=MI0005560\_1;accession\_number=MI0005560;Name=hsa-mir-885  
Total reads = 0



**D) PPB Case 14 cell line miRNA sequencing**  
ID=MI0005560\_1;accession\_number=MI0005560;Name=hsa-mir-885  
Total reads = 0



**B) Normal fibroblast miRNA sequencing**  
ID=MI0015878\_1;accession\_number=MI0015878;Name=hsa-mir-4270  
Total reads = 0



**C) PPB Case 14 tumor miRNA sequencing**  
ID=MI0015878\_1;accession\_number=MI0015878;Name=hsa-mir-4270  
Total reads = 0



**D) PPB Case 14 cell line miRNA sequencing**  
ID=MI0015878\_1;accession\_number=MI0015878;Name=hsa-mir-4270  
Total reads = 0



**B) Normal fibroblast miRNA sequencing**  
ID=MI0014155\_1;accession\_number=MI0014155;Name=hsa-mir-3134  
Total reads = 0



**C) PPB Case 14 tumor miRNA sequencing**  
ID=MI0014155\_1;accession\_number=MI0014155;Name=hsa-mir-3134  
Total reads = 0



**D) PPB Case 14 cell line miRNA sequencing**  
ID=MI0014155\_1;accession\_number=MI0014155;Name=hsa-mir-3134  
Total reads = 0





**B) Normal fibroblast miRNA sequencing**  
ID=MI0003569\_1;accession\_number=MI0003569;Name=hsa-mir-563  
Total reads = 0



**C) PPB Case 14 tumor miRNA sequencing**  
ID=MI0003569\_1;accession\_number=MI0003569;Name=hsa-mir-563  
Total reads = 0



**D) PPB Case 14 cell line miRNA sequencing**  
ID=MI0003569\_1;accession\_number=MI0003569;Name=hsa-mir-563  
Total reads = 0



**B) Normal fibroblast miRNA sequencing**  
ID=MI0016135\_1;accession\_number=MI0016135;Name=hsa-mir-3714  
Total reads = 0



**C) PPB Case 14 tumor miRNA sequencing**  
ID=MI0016135\_1;accession\_number=MI0016135;Name=hsa-mir-3714  
Total reads = 0



**D) PPB Case 14 cell line miRNA sequencing**  
ID=MI0016135\_1;accession\_number=MI0016135;Name=hsa-mir-3714  
Total reads = 0



**B) Normal fibroblast miRNA sequencing**  
ID=MI0017438\_1;accession\_number=MI0017438;Name=hsa-mir-4791  
Total reads = 0



**C) PPB Case 14 tumor miRNA sequencing**  
ID=MI0017438\_1;accession\_number=MI0017438;Name=hsa-mir-4791  
Total reads = 0



**D) PPB Case 14 cell line miRNA sequencing**  
ID=MI0017438\_1;accession\_number=MI0017438;Name=hsa-mir-4791  
Total reads = 0



**B) Normal fibroblast miRNA sequencing**  
ID=MI0014156\_1;accession\_number=MI0014156;Name=hsa-mir-3135a  
Total reads = 0



**C) PPB Case 14 tumor miRNA sequencing**  
ID=MI0014156\_1;accession\_number=MI0014156;Name=hsa-mir-3135a  
Total reads = 0



**D) PPB Case 14 cell line miRNA sequencing**  
ID=MI0014156\_1;accession\_number=MI0014156;Name=hsa-mir-3135a  
Total reads = 0



**B) Normal fibroblast miRNA sequencing**  
ID=MI0017439\_1;accession\_number=MI0017439;Name=hsa-mir-4792  
Total reads = 0



**C) PPB Case 14 tumor miRNA sequencing**  
ID=MI0017439\_1;accession\_number=MI0017439;Name=hsa-mir-4792  
Total reads = 0



**D) PPB Case 14 cell line miRNA sequencing**  
ID=MI0017439\_1;accession\_number=MI0017439;Name=hsa-mir-4792  
Total reads = 0



**B) Normal fibroblast miRNA sequencing**  
ID=MI0016785\_1;accession\_number=MI0016785;Name=hsa-mir-4442  
Total reads = 0



**C) PPB Case 14 tumor miRNA sequencing**  
ID=MI0016785\_1;accession\_number=MI0016785;Name=hsa-mir-4442  
Total reads = 0



**D) PPB Case 14 cell line miRNA sequencing**  
ID=MI0016785\_1;accession\_number=MI0016785;Name=hsa-mir-4442  
Total reads = 0



**B) Normal fibroblast miRNA sequencing**  
ID=MI0014157\_1;accession\_number=MI0014157;Name=hsa-mir-466  
Total reads = 0



**C) PPB Case 14 tumor miRNA sequencing**  
ID=MI0014157\_1;accession\_number=MI0014157;Name=hsa-mir-466  
Total reads = 0



**D) PPB Case 14 cell line miRNA sequencing**  
ID=MI0014157\_1;accession\_number=MI0014157;Name=hsa-mir-466  
Total reads = 0



**B) Normal fibroblast miRNA sequencing**  
ID=MI0022210\_1;accession\_number=MI0022210;Name=hsa-mir-548ay  
Total reads = 0



**C) PPB Case 14 tumor miRNA sequencing**  
ID=MI0022210\_1;accession\_number=MI0022210;Name=hsa-mir-548ay  
Total reads = 0



**D) PPB Case 14 cell line miRNA sequencing**  
ID=MI0022210\_1;accession\_number=MI0022210;Name=hsa-mir-548ay  
Total reads = 0





**B) Normal fibroblast miRNA sequencing**  
ID=MI0003570\_1;accession\_number=MI0003570;Name=hsa-mir-564  
Total reads = 0



**C) PPB Case 14 tumor miRNA sequencing**  
ID=MI0003570\_1;accession\_number=MI0003570;Name=hsa-mir-564  
Total reads = 0



**D) PPB Case 14 cell line miRNA sequencing**  
ID=MI0003570\_1;accession\_number=MI0003570;Name=hsa-mir-564  
Total reads = 0



**B) Normal fibroblast miRNA sequencing**  
ID=MI0016786\_1;accession\_number=MI0016786;Name=hsa-mir-4443  
Total reads = 0



**C) PPB Case 14 tumor miRNA sequencing**  
ID=MI0016786\_1;accession\_number=MI0016786;Name=hsa-mir-4443  
Total reads = 0



**D) PPB Case 14 cell line miRNA sequencing**  
ID=MI0016786\_1;accession\_number=MI0016786;Name=hsa-mir-4443  
Total reads = 0



**B) Normal fibroblast miRNA sequencing**  
ID=MI0010634\_1;accession\_number=MI0010634;Name=hsa-mir-2115  
Total reads = 0



**C) PPB Case 14 tumor miRNA sequencing**  
ID=MI0010634\_1;accession\_number=MI0010634;Name=hsa-mir-2115  
Total reads = 0



**D) PPB Case 14 cell line miRNA sequencing**  
ID=MI0010634\_1;accession\_number=MI0010634;Name=hsa-mir-2115  
Total reads = 0



**B) Normal fibroblast miRNA sequencing**  
ID=MI0012488\_1;accession\_number=MI0012488;Name=hsa-mir-711  
Total reads = 0



**C) PPB Case 14 tumor miRNA sequencing**  
ID=MI0012488\_1;accession\_number=MI0012488;Name=hsa-mir-711  
Total reads = 0



**D) PPB Case 14 cell line miRNA sequencing**  
ID=MI0012488\_1;accession\_number=MI0012488;Name=hsa-mir-711  
Total reads = 0



**B) Normal fibroblast miRNA sequencing**  
ID=MI0017440\_1;accession\_number=MI0017440;Name=hsa-mir-4793  
Total reads = 0



**C) PPB Case 14 tumor miRNA sequencing**  
ID=MI0017440\_1;accession\_number=MI0017440;Name=hsa-mir-4793  
Total reads = 0



**D) PPB Case 14 cell line miRNA sequencing**  
ID=MI0017440\_1;accession\_number=MI0017440;Name=hsa-mir-4793  
Total reads = 0



**B) Normal fibroblast miRNA sequencing**  
ID=MI0015879\_1;accession\_number=MI0015879;Name=hsa-mir-4271  
Total reads = 0



**C) PPB Case 14 tumor miRNA sequencing**  
ID=MI0015879\_1;accession\_number=MI0015879;Name=hsa-mir-4271  
Total reads = 0



**D) PPB Case 14 cell line miRNA sequencing**  
ID=MI0015879\_1;accession\_number=MI0015879;Name=hsa-mir-4271  
Total reads = 0



**B) Normal fibroblast miRNA sequencing**  
ID=MI0018172\_1;accession\_number=MI0018172;Name=hsa-mir-5193  
Total reads = 0



**C) PPB Case 14 tumor miRNA sequencing**  
ID=MI0018172\_1;accession\_number=MI0018172;Name=hsa-mir-5193  
Total reads = 0



**D) PPB Case 14 cell line miRNA sequencing**  
ID=MI0018172\_1;accession\_number=MI0018172;Name=hsa-mir-5193  
Total reads = 0



**B) Normal fibroblast miRNA sequencing**  
ID=MI0003572\_1;accession\_number=MI0003572;Name=hsa-mir-566  
Total reads = 0



**C) PPB Case 14 tumor miRNA sequencing**  
ID=MI0003572\_1;accession\_number=MI0003572;Name=hsa-mir-566  
Total reads = 0



**D) PPB Case 14 cell line miRNA sequencing**  
ID=MI0003572\_1;accession\_number=MI0003572;Name=hsa-mir-566  
Total reads = 0





**B) Normal fibroblast miRNA sequencing**  
ID=MI0019797\_1;accession\_number=MI0019797;Name=hsa-mir-5787  
Total reads = 0



**C) PPB Case 14 tumor miRNA sequencing**  
ID=MI0019797\_1;accession\_number=MI0019797;Name=hsa-mir-5787  
Total reads = 0



**D) PPB Case 14 cell line miRNA sequencing**  
ID=MI0019797\_1;accession\_number=MI0019797;Name=hsa-mir-5787  
Total reads = 0



**B) Normal fibroblast miRNA sequencing**  
ID=MI0017434\_1;accession\_number=MI0017434;Name=hsa-mir-4787  
Total reads = 0



**C) PPB Case 14 tumor miRNA sequencing**  
ID=MI0017434\_1;accession\_number=MI0017434;Name=hsa-mir-4787  
Total reads = 0



**D) PPB Case 14 cell line miRNA sequencing**  
ID=MI0017434\_1;accession\_number=MI0017434;Name=hsa-mir-4787  
Total reads = 0



**B) Normal fibroblast miRNA sequencing**  
ID=MI0000452\_1;accession\_number=MI0000452;Name=hsa-mir-135a-1  
Total reads = 0



**C) PPB Case 14 tumor miRNA sequencing**  
ID=MI0000452\_1;accession\_number=MI0000452;Name=hsa-mir-135a-1  
Total reads = 0



**D) PPB Case 14 cell line miRNA sequencing**  
ID=MI0000452\_1;accession\_number=MI0000452;Name=hsa-mir-135a-1  
Total reads = 0



**B) Normal fibroblast miRNA sequencing**  
ID=MI0016594\_1;accession\_number=MI0016594;Name=hsa-mir-3938  
Total reads = 0



**C) PPB Case 14 tumor miRNA sequencing**  
ID=MI0016594\_1;accession\_number=MI0016594;Name=hsa-mir-3938  
Total reads = 0



**D) PPB Case 14 cell line miRNA sequencing**  
ID=MI0016594\_1;accession\_number=MI0016594;Name=hsa-mir-3938  
Total reads = 0



**B) Normal fibroblast miRNA sequencing**  
ID=MI0015880\_1;accession\_number=MI0015880;Name=hsa-mir-4272  
Total reads = 0



**C) PPB Case 14 tumor miRNA sequencing**  
ID=MI0015880\_1;accession\_number=MI0015880;Name=hsa-mir-4272  
Total reads = 0



**D) PPB Case 14 cell line miRNA sequencing**  
ID=MI0015880\_1;accession\_number=MI0015880;Name=hsa-mir-4272  
Total reads = 0



**B) Normal fibroblast miRNA sequencing**  
ID=MI0014158\_1;accession\_number=MI0014158;Name=hsa-mir-3136  
Total reads = 0



**C) PPB Case 14 tumor miRNA sequencing**  
ID=MI0014158\_1;accession\_number=MI0014158;Name=hsa-mir-3136  
Total reads = 0



**D) PPB Case 14 cell line miRNA sequencing**  
ID=MI0014158\_1;accession\_number=MI0014158;Name=hsa-mir-3136  
Total reads = 0



**B) Normal fibroblast miRNA sequencing**  
ID=MI0006431\_1;accession\_number=MI0006431;Name=hsa-mir-1284  
Total reads = 0



**C) PPB Case 14 tumor miRNA sequencing**  
ID=MI0006431\_1;accession\_number=MI0006431;Name=hsa-mir-1284  
Total reads = 0



**D) PPB Case 14 cell line miRNA sequencing**  
ID=MI0006431\_1;accession\_number=MI0006431;Name=hsa-mir-1284  
Total reads = 0



**B) Normal fibroblast miRNA sequencing**  
ID=MI0019111\_1;accession\_number=MI0019111;Name=hsa-mir-4444-2  
Total reads = 0



**C) PPB Case 14 tumor miRNA sequencing**  
ID=MI0019111\_1;accession\_number=MI0019111;Name=hsa-mir-4444-2  
Total reads = 0



**D) PPB Case 14 cell line miRNA sequencing**  
ID=MI0019111\_1;accession\_number=MI0019111;Name=hsa-mir-4444-2  
Total reads = 0





**B) Normal fibroblast miRNA sequencing**  
ID=MI0006657\_1;accession\_number=MI0006657;Name=hsa-mir-1324  
Total reads = 0



**C) PPB Case 14 tumor miRNA sequencing**  
ID=MI0006657\_1;accession\_number=MI0006657;Name=hsa-mir-1324  
Total reads = 0



**D) PPB Case 14 cell line miRNA sequencing**  
ID=MI0006657\_1;accession\_number=MI0006657;Name=hsa-mir-1324  
Total reads = 0



**B) Normal fibroblast miRNA sequencing**  
ID=MI0015881\_1;accession\_number=MI0015881;Name=hsa-mir-4273  
Total reads = 0



**C) PPB Case 14 tumor miRNA sequencing**  
ID=MI0015881\_1;accession\_number=MI0015881;Name=hsa-mir-4273  
Total reads = 0



**D) PPB Case 14 cell line miRNA sequencing**  
ID=MI0015881\_1;accession\_number=MI0015881;Name=hsa-mir-4273  
Total reads = 0



**B) Normal fibroblast miRNA sequencing**  
ID=MI0016430\_1;accession\_number=MI0016430;Name=hsa-mir-3923  
Total reads = 0



**C) PPB Case 14 tumor miRNA sequencing**  
ID=MI0016430\_1;accession\_number=MI0016430;Name=hsa-mir-3923  
Total reads = 0



**D) PPB Case 14 cell line miRNA sequencing**  
ID=MI0016430\_1;accession\_number=MI0016430;Name=hsa-mir-3923  
Total reads = 0



**B) Normal fibroblast miRNA sequencing**  
ID=MI0019292\_1;accession\_number=MI0019292;Name=hsa-mir-5688  
Total reads = 0



**C) PPB Case 14 tumor miRNA sequencing**  
ID=MI0019292\_1;accession\_number=MI0019292;Name=hsa-mir-5688  
Total reads = 0



**D) PPB Case 14 cell line miRNA sequencing**  
ID=MI0019292\_1;accession\_number=MI0019292;Name=hsa-mir-5688  
Total reads = 0



**B) Normal fibroblast miRNA sequencing**  
ID=MI0017442\_1;accession\_number=MI0017442;Name=hsa-mir-4795  
Total reads = 0



**C) PPB Case 14 tumor miRNA sequencing**  
ID=MI0017442\_1;accession\_number=MI0017442;Name=hsa-mir-4795  
Total reads = 0



**D) PPB Case 14 cell line miRNA sequencing**  
ID=MI0017442\_1;accession\_number=MI0017442;Name=hsa-mir-4795  
Total reads = 0



**B) Normal fibroblast miRNA sequencing**  
ID=MI0016428\_1;accession\_number=MI0016428;Name=hsa-mir-3921  
Total reads = 0



**C) PPB Case 14 tumor miRNA sequencing**  
ID=MI0016428\_1;accession\_number=MI0016428;Name=hsa-mir-3921  
Total reads = 0



**D) PPB Case 14 cell line miRNA sequencing**  
ID=MI0016428\_1;accession\_number=MI0016428;Name=hsa-mir-3921  
Total reads = 0



**B) Normal fibroblast miRNA sequencing**  
ID=MI0016752\_1;accession\_number=MI0016752;Name=hsa-mir-548ab  
Total reads = 0



**C) PPB Case 14 tumor miRNA sequencing**  
ID=MI0016752\_1;accession\_number=MI0016752;Name=hsa-mir-548ab  
Total reads = 0



**D) PPB Case 14 cell line miRNA sequencing**  
ID=MI0016752\_1;accession\_number=MI0016752;Name=hsa-mir-548ab  
Total reads = 0



**B) Normal fibroblast miRNA sequencing**  
ID=MI0016788\_1;accession\_number=MI0016788;Name=hsa-mir-4445  
Total reads = 0



**C) PPB Case 14 tumor miRNA sequencing**  
ID=MI0016788\_1;accession\_number=MI0016788;Name=hsa-mir-4445  
Total reads = 0



**D) PPB Case 14 cell line miRNA sequencing**  
ID=MI0016788\_1;accession\_number=MI0016788;Name=hsa-mir-4445  
Total reads = 0





**B) Normal fibroblast miRNA sequencing**  
ID=MI0003573\_1;accession\_number=MI0003573;Name=hsa-mir-567  
Total reads = 0



**C) PPB Case 14 tumor miRNA sequencing**  
ID=MI0003573\_1;accession\_number=MI0003573;Name=hsa-mir-567  
Total reads = 0



**D) PPB Case 14 cell line miRNA sequencing**  
ID=MI0003573\_1;accession\_number=MI0003573;Name=hsa-mir-567  
Total reads = 0



**B) Normal fibroblast miRNA sequencing**  
ID=MI0016789\_1;accession\_number=MI0016789;Name=hsa-mir-4446  
Total reads = 0



**C) PPB Case 14 tumor miRNA sequencing**  
ID=MI0016789\_1;accession\_number=MI0016789;Name=hsa-mir-4446  
Total reads = 0



**D) PPB Case 14 cell line miRNA sequencing**  
ID=MI0016789\_1;accession\_number=MI0016789;Name=hsa-mir-4446  
Total reads = 0



**B) Normal fibroblast miRNA sequencing**  
ID=MI0003574\_1;accession\_number=MI0003574;Name=hsa-mir-568  
Total reads = 0



**C) PPB Case 14 tumor miRNA sequencing**  
ID=MI0003574\_1;accession\_number=MI0003574;Name=hsa-mir-568  
Total reads = 0



**D) PPB Case 14 cell line miRNA sequencing**  
ID=MI0003574\_1;accession\_number=MI0003574;Name=hsa-mir-568  
Total reads = 0



**B) Normal fibroblast miRNA sequencing**  
ID=MI0017443\_1;accession\_number=MI0017443;Name=hsa-mir-4796  
Total reads = 0



**C) PPB Case 14 tumor miRNA sequencing**  
ID=MI0017443\_1;accession\_number=MI0017443;Name=hsa-mir-4796  
Total reads = 0



**D) PPB Case 14 cell line miRNA sequencing**  
ID=MI0017443\_1;accession\_number=MI0017443;Name=hsa-mir-4796  
Total reads = 0



**B) Normal fibroblast miRNA sequencing**  
ID=MI0016790\_1;accession\_number=MI0016790;Name=hsa-mir-4447  
Total reads = 0



**C) PPB Case 14 tumor miRNA sequencing**  
ID=MI0016790\_1;accession\_number=MI0016790;Name=hsa-mir-4447  
Total reads = 0



**D) PPB Case 14 cell line miRNA sequencing**  
ID=MI0016790\_1;accession\_number=MI0016790;Name=hsa-mir-4447  
Total reads = 0



**B) Normal fibroblast miRNA sequencing**  
ID=MI0000240\_1;accession\_number=MI0000240;Name=hsa-mir-198  
Total reads = 0



**C) PPB Case 14 tumor miRNA sequencing**  
ID=MI0000240\_1;accession\_number=MI0000240;Name=hsa-mir-198  
Total reads = 0



**D) PPB Case 14 cell line miRNA sequencing**  
ID=MI0000240\_1;accession\_number=MI0000240;Name=hsa-mir-198  
Total reads = 0



**B) Normal fibroblast miRNA sequencing**  
ID=MI0019282\_1;accession\_number=MI0019282;Name=hsa-mir-5682  
Total reads = 0



**C) PPB Case 14 tumor miRNA sequencing**  
ID=MI0019282\_1;accession\_number=MI0019282;Name=hsa-mir-5682  
Total reads = 0



**D) PPB Case 14 cell line miRNA sequencing**  
ID=MI0019282\_1;accession\_number=MI0019282;Name=hsa-mir-5682  
Total reads = 0



**B) Normal fibroblast miRNA sequencing**  
ID=MI0017868\_1;accession\_number=MI0017868;Name=hsa-mir-5002  
Total reads = 0



**C) PPB Case 14 tumor miRNA sequencing**  
ID=MI0017868\_1;accession\_number=MI0017868;Name=hsa-mir-5002  
Total reads = 0



**D) PPB Case 14 cell line miRNA sequencing**  
ID=MI0017868\_1;accession\_number=MI0017868;Name=hsa-mir-5002  
Total reads = 0





**B) Normal fibroblast miRNA sequencing**  
ID=MI0020360\_1;accession\_number=MI0020360;Name=hsa-mir-6083  
Total reads = 0



**C) PPB Case 14 tumor miRNA sequencing**  
ID=MI0020360\_1;accession\_number=MI0020360;Name=hsa-mir-6083  
Total reads = 0



**D) PPB Case 14 cell line miRNA sequencing**  
ID=MI0020360\_1;accession\_number=MI0020360;Name=hsa-mir-6083  
Total reads = 0



**B) Normal fibroblast miRNA sequencing**  
ID=MI0014159\_1;accession\_number=MI0014159;Name=hsa-mir-544b  
Total reads = 0



**C) PPB Case 14 tumor miRNA sequencing**  
ID=MI0014159\_1;accession\_number=MI0014159;Name=hsa-mir-544b  
Total reads = 0



**D) PPB Case 14 cell line miRNA sequencing**  
ID=MI0014159\_1;accession\_number=MI0014159;Name=hsa-mir-544b  
Total reads = 0



**B) Normal fibroblast miRNA sequencing**  
ID=MI0017981\_1;accession\_number=MI0017981;Name=hsa-mir-5092  
Total reads = 0



**C) PPB Case 14 tumor miRNA sequencing**  
ID=MI0017981\_1;accession\_number=MI0017981;Name=hsa-mir-5092  
Total reads = 0



**D) PPB Case 14 cell line miRNA sequencing**  
ID=MI0017981\_1;accession\_number=MI0017981;Name=hsa-mir-5092  
Total reads = 0



**B) Normal fibroblast miRNA sequencing**  
ID=MI0006421\_1;accession\_number=MI0006421;Name=hsa-mir-548i-1  
Total reads = 0



**C) PPB Case 14 tumor miRNA sequencing**  
ID=MI0006421\_1;accession\_number=MI0006421;Name=hsa-mir-548i-1  
Total reads = 0



**D) PPB Case 14 cell line miRNA sequencing**  
ID=MI0006421\_1;accession\_number=MI0006421;Name=hsa-mir-548i-1  
Total reads = 0



**B) Normal fibroblast miRNA sequencing**  
ID=MI0019312\_1;accession\_number=MI0019312;Name=hsa-mir-5704  
Total reads = 0



**C) PPB Case 14 tumor miRNA sequencing**  
ID=MI0019312\_1;accession\_number=MI0019312;Name=hsa-mir-5704  
Total reads = 0



**D) PPB Case 14 cell line miRNA sequencing**  
ID=MI0019312\_1;accession\_number=MI0019312;Name=hsa-mir-5704  
Total reads = 0



**B) Normal fibroblast miRNA sequencing**  
ID=MI0017435\_1;accession\_number=MI0017435;Name=hsa-mir-4788  
Total reads = 0



**C) PPB Case 14 tumor miRNA sequencing**  
ID=MI0017435\_1;accession\_number=MI0017435;Name=hsa-mir-4788  
Total reads = 0



**D) PPB Case 14 cell line miRNA sequencing**  
ID=MI0017435\_1;accession\_number=MI0017435;Name=hsa-mir-4788  
Total reads = 0



**B) Normal fibroblast miRNA sequencing**  
ID=MI0018165\_1;accession\_number=MI0018165;Name=hsa-mir-5186  
Total reads = 0



**C) PPB Case 14 tumor miRNA sequencing**  
ID=MI0018165\_1;accession\_number=MI0018165;Name=hsa-mir-5186  
Total reads = 0



**D) PPB Case 14 cell line miRNA sequencing**  
ID=MI0018165\_1;accession\_number=MI0018165;Name=hsa-mir-5186  
Total reads = 0



**B) Normal fibroblast miRNA sequencing**  
ID=MI0016425\_1;accession\_number=MI0016425;Name=hsa-mir-3919  
Total reads = 0



**C) PPB Case 14 tumor miRNA sequencing**  
ID=MI0016425\_1;accession\_number=MI0016425;Name=hsa-mir-3919  
Total reads = 0



**D) PPB Case 14 cell line miRNA sequencing**  
ID=MI0016425\_1;accession\_number=MI0016425;Name=hsa-mir-3919  
Total reads = 0





**B) Normal fibroblast miRNA sequencing**  
ID=MI0006398\_1;accession\_number=MI0006398;Name=hsa-mir-1263  
Total reads = 0



**C) PPB Case 14 tumor miRNA sequencing**  
ID=MI0006398\_1;accession\_number=MI0006398;Name=hsa-mir-1263  
Total reads = 0



**D) PPB Case 14 cell line miRNA sequencing**  
ID=MI0006398\_1;accession\_number=MI0006398;Name=hsa-mir-1263  
Total reads = 0



**B) Normal fibroblast miRNA sequencing**  
ID=MI0003576\_1;accession\_number=MI0003576;Name=hsa-mir-569  
Total reads = 0



**C) PPB Case 14 tumor miRNA sequencing**  
ID=MI0003576\_1;accession\_number=MI0003576;Name=hsa-mir-569  
Total reads = 0



**D) PPB Case 14 cell line miRNA sequencing**  
ID=MI0003576\_1;accession\_number=MI0003576;Name=hsa-mir-569  
Total reads = 0



**B) Normal fibroblast miRNA sequencing**  
ID=MI0017436\_1;accession\_number=MI0017436;Name=hsa-mir-4789  
Total reads = 0



**C) PPB Case 14 tumor miRNA sequencing**  
ID=MI0017436\_1;accession\_number=MI0017436;Name=hsa-mir-4789  
Total reads = 0



**D) PPB Case 14 cell line miRNA sequencing**  
ID=MI0017436\_1;accession\_number=MI0017436;Name=hsa-mir-4789  
Total reads = 0



**B) Normal fibroblast miRNA sequencing**  
ID=MI0016791\_1;accession\_number=MI0016791;Name=hsa-mir-4448  
Total reads = 0



**C) PPB Case 14 tumor miRNA sequencing**  
ID=MI0016791\_1;accession\_number=MI0016791;Name=hsa-mir-4448  
Total reads = 0



**D) PPB Case 14 cell line miRNA sequencing**  
ID=MI0016791\_1;accession\_number=MI0016791;Name=hsa-mir-4448  
Total reads = 0



**B) Normal fibroblast miRNA sequencing**  
ID=MI0003764\_1;accession\_number=MI0003764;Name=hsa-mir-1224  
Total reads = 0



**C) PPB Case 14 tumor miRNA sequencing**  
ID=MI0003764\_1;accession\_number=MI0003764;Name=hsa-mir-1224  
Total reads = 0



**D) PPB Case 14 cell line miRNA sequencing**  
ID=MI0003764\_1;accession\_number=MI0003764;Name=hsa-mir-1224  
Total reads = 0



**B) Normal fibroblast miRNA sequencing**  
ID=MI0019147\_1;accession\_number=MI0019147;Name=hsa-mir-5588  
Total reads = 0



**C) PPB Case 14 tumor miRNA sequencing**  
ID=MI0019147\_1;accession\_number=MI0019147;Name=hsa-mir-5588  
Total reads = 0



**D) PPB Case 14 cell line miRNA sequencing**  
ID=MI0019147\_1;accession\_number=MI0019147;Name=hsa-mir-5588  
Total reads = 0



**B) Normal fibroblast miRNA sequencing**  
ID=MI0019130\_1;accession\_number=MI0019130;Name=hsa-mir-548aq  
Total reads = 0



**C) PPB Case 14 tumor miRNA sequencing**  
ID=MI0019130\_1;accession\_number=MI0019130;Name=hsa-mir-548aq  
Total reads = 0



**D) PPB Case 14 cell line miRNA sequencing**  
ID=MI0019130\_1;accession\_number=MI0019130;Name=hsa-mir-548aq  
Total reads = 0



**B) Normal fibroblast miRNA sequencing**  
ID=MI0005769\_1;accession\_number=MI0005769;Name=hsa-mir-944  
Total reads = 0



**C) PPB Case 14 tumor miRNA sequencing**  
ID=MI0005769\_1;accession\_number=MI0005769;Name=hsa-mir-944  
Total reads = 0



**D) PPB Case 14 cell line miRNA sequencing**  
ID=MI0005769\_1;accession\_number=MI0005769;Name=hsa-mir-944  
Total reads = 0





**B) Normal fibroblast miRNA sequencing**  
ID=MI0014160\_1;accession\_number=MI0014160;Name=hsa-mir-3137  
Total reads = 0



**C) PPB Case 14 tumor miRNA sequencing**  
ID=MI0014160\_1;accession\_number=MI0014160;Name=hsa-mir-3137  
Total reads = 0



**D) PPB Case 14 cell line miRNA sequencing**  
ID=MI0014160\_1;accession\_number=MI0014160;Name=hsa-mir-3137  
Total reads = 0



**B) Normal fibroblast miRNA sequencing**  
ID=MI0003577\_1;accession\_number=MI0003577;Name=hsa-mir-570  
Total reads = 0



**C) PPB Case 14 tumor miRNA sequencing**  
ID=MI0003577\_1;accession\_number=MI0003577;Name=hsa-mir-570  
Total reads = 0



**D) PPB Case 14 cell line miRNA sequencing**  
ID=MI0003577\_1;accession\_number=MI0003577;Name=hsa-mir-570  
Total reads = 0



**B) Normal fibroblast miRNA sequencing**  
ID=MI0017444\_1;accession\_number=MI0017444;Name=hsa-mir-4797  
Total reads = 0



**C) PPB Case 14 tumor miRNA sequencing**  
ID=MI0017444\_1;accession\_number=MI0017444;Name=hsa-mir-4797  
Total reads = 0



**D) PPB Case 14 cell line miRNA sequencing**  
ID=MI0017444\_1;accession\_number=MI0017444;Name=hsa-mir-4797  
Total reads = 0



**B) Normal fibroblast miRNA sequencing**  
ID=MI0005714\_1;accession\_number=MI0005714;Name=hsa-mir-922  
Total reads = 0



**C) PPB Case 14 tumor miRNA sequencing**  
ID=MI0005714\_1;accession\_number=MI0005714;Name=hsa-mir-922  
Total reads = 0



**D) PPB Case 14 cell line miRNA sequencing**  
ID=MI0005714\_1;accession\_number=MI0005714;Name=hsa-mir-922  
Total reads = 0



**B) Normal fibroblast miRNA sequencing**  
ID=MI0003578\_1;accession\_number=MI0003578;Name=hsa-mir-571  
Total reads = 0



**C) PPB Case 14 tumor miRNA sequencing**  
ID=MI0003578\_1;accession\_number=MI0003578;Name=hsa-mir-571  
Total reads = 0



**D) PPB Case 14 cell line miRNA sequencing**  
ID=MI0003578\_1;accession\_number=MI0003578;Name=hsa-mir-571  
Total reads = 0



**B) Normal fibroblast miRNA sequencing**  
ID=MI0005768\_1;accession\_number=MI0005768;Name=hsa-mir-943  
Total reads = 0



**C) PPB Case 14 tumor miRNA sequencing**  
ID=MI0005768\_1;accession\_number=MI0005768;Name=hsa-mir-943  
Total reads = 0



**D) PPB Case 14 cell line miRNA sequencing**  
ID=MI0005768\_1;accession\_number=MI0005768;Name=hsa-mir-943  
Total reads = 0



**B) Normal fibroblast miRNA sequencing**  
ID=MI0017448\_1;accession\_number=MI0017448;Name=hsa-mir-4800  
Total reads = 0



**C) PPB Case 14 tumor miRNA sequencing**  
ID=MI0017448\_1;accession\_number=MI0017448;Name=hsa-mir-4800  
Total reads = 0



**D) PPB Case 14 cell line miRNA sequencing**  
ID=MI0017448\_1;accession\_number=MI0017448;Name=hsa-mir-4800  
Total reads = 0



**B) Normal fibroblast miRNA sequencing**  
ID=MI0016749\_1;accession\_number=MI0016749;Name=hsa-mir-378d-1  
Total reads = 0



**C) PPB Case 14 tumor miRNA sequencing**  
ID=MI0016749\_1;accession\_number=MI0016749;Name=hsa-mir-378d-1  
Total reads = 0



**D) PPB Case 14 cell line miRNA sequencing**  
ID=MI0016749\_1;accession\_number=MI0016749;Name=hsa-mir-378d-1  
Total reads = 0





**B) Normal fibroblast miRNA sequencing**  
ID=MI0017445\_1;accession\_number=MI0017445;Name=hsa-mir-4798  
Total reads = 0



**C) PPB Case 14 tumor miRNA sequencing**  
ID=MI0017445\_1;accession\_number=MI0017445;Name=hsa-mir-4798  
Total reads = 0



**D) PPB Case 14 cell line miRNA sequencing**  
ID=MI0017445\_1;accession\_number=MI0017445;Name=hsa-mir-4798  
Total reads = 0



**B) Normal fibroblast miRNA sequencing**  
ID=MI0015884\_1;accession\_number=MI0015884;Name=hsa-mir-4274  
Total reads = 0



**C) PPB Case 14 tumor miRNA sequencing**  
ID=MI0015884\_1;accession\_number=MI0015884;Name=hsa-mir-4274  
Total reads = 0



**D) PPB Case 14 cell line miRNA sequencing**  
ID=MI0015884\_1;accession\_number=MI0015884;Name=hsa-mir-4274  
Total reads = 0



**B) Normal fibroblast miRNA sequencing**  
ID=MI0000097\_1;accession\_number=MI0000097;Name=hsa-mir-95  
Total reads = 0



**C) PPB Case 14 tumor miRNA sequencing**  
ID=MI0000097\_1;accession\_number=MI0000097;Name=hsa-mir-95  
Total reads = 0



**D) PPB Case 14 cell line miRNA sequencing**  
ID=MI0000097\_1;accession\_number=MI0000097;Name=hsa-mir-95  
Total reads = 0



**B) Normal fibroblast miRNA sequencing**  
ID=MI0006422\_1;accession\_number=MI0006422;Name=hsa-mir-548i-2  
Total reads = 0



**C) PPB Case 14 tumor miRNA sequencing**  
ID=MI0006422\_1;accession\_number=MI0006422;Name=hsa-mir-548i-2  
Total reads = 0



**D) PPB Case 14 cell line miRNA sequencing**  
ID=MI0006422\_1;accession\_number=MI0006422;Name=hsa-mir-548i-2  
Total reads = 0



**B) Normal fibroblast miRNA sequencing**  
ID=MI0014161\_1;accession\_number=MI0014161;Name=hsa-mir-3138  
Total reads = 0



**C) PPB Case 14 tumor miRNA sequencing**  
ID=MI0014161\_1;accession\_number=MI0014161;Name=hsa-mir-3138  
Total reads = 0



**D) PPB Case 14 cell line miRNA sequencing**  
ID=MI0014161\_1;accession\_number=MI0014161;Name=hsa-mir-3138  
Total reads = 1

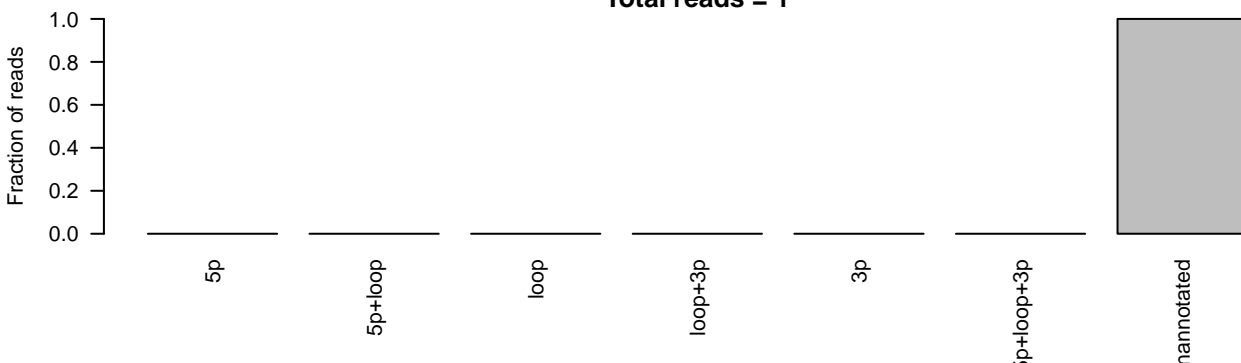

**B) Normal fibroblast miRNA sequencing**  
ID=MI0003579\_1;accession\_number=MI0003579;Name=hsa-mir-572  
Total reads = 0



**C) PPB Case 14 tumor miRNA sequencing**  
ID=MI0003579\_1;accession\_number=MI0003579;Name=hsa-mir-572  
Total reads = 0



**D) PPB Case 14 cell line miRNA sequencing**  
ID=MI0003579\_1;accession\_number=MI0003579;Name=hsa-mir-572  
Total reads = 0



**B) Normal fibroblast miRNA sequencing**  
ID=MI0017980\_1;accession\_number=MI0017980;Name=hsa-mir-5091  
Total reads = 0



**C) PPB Case 14 tumor miRNA sequencing**  
ID=MI0017980\_1;accession\_number=MI0017980;Name=hsa-mir-5091  
Total reads = 0



**D) PPB Case 14 cell line miRNA sequencing**  
ID=MI0017980\_1;accession\_number=MI0017980;Name=hsa-mir-5091  
Total reads = 0



**B) Normal fibroblast miRNA sequencing**  
ID=MI0003580\_1;accession\_number=MI0003580;Name=hsa-mir-573  
Total reads = 0



**C) PPB Case 14 tumor miRNA sequencing**  
ID=MI0003580\_1;accession\_number=MI0003580;Name=hsa-mir-573  
Total reads = 0



**D) PPB Case 14 cell line miRNA sequencing**  
ID=MI0003580\_1;accession\_number=MI0003580;Name=hsa-mir-573  
Total reads = 0





**B) Normal fibroblast miRNA sequencing**  
ID=MI0015883\_1;accession\_number=MI0015883;Name=hsa-mir-4275  
Total reads = 0



**C) PPB Case 14 tumor miRNA sequencing**  
ID=MI0015883\_1;accession\_number=MI0015883;Name=hsa-mir-4275  
Total reads = 0



**D) PPB Case 14 cell line miRNA sequencing**  
ID=MI0015883\_1;accession\_number=MI0015883;Name=hsa-mir-4275  
Total reads = 0



**B) Normal fibroblast miRNA sequencing**  
ID=MI0006435\_1;accession\_number=MI0006435;Name=hsa-mir-1255b-1  
Total reads = 0



**C) PPB Case 14 tumor miRNA sequencing**  
ID=MI0006435\_1;accession\_number=MI0006435;Name=hsa-mir-1255b-1  
Total reads = 0



**D) PPB Case 14 cell line miRNA sequencing**  
ID=MI0006435\_1;accession\_number=MI0006435;Name=hsa-mir-1255b-1  
Total reads = 0



**B) Normal fibroblast miRNA sequencing**  
ID=MI0017449\_1;accession\_number=MI0017449;Name=hsa-mir-4801  
Total reads = 0



**C) PPB Case 14 tumor miRNA sequencing**  
ID=MI0017449\_1;accession\_number=MI0017449;Name=hsa-mir-4801  
Total reads = 0



**D) PPB Case 14 cell line miRNA sequencing**  
ID=MI0017449\_1;accession\_number=MI0017449;Name=hsa-mir-4801  
Total reads = 0



**B) Normal fibroblast miRNA sequencing**  
ID=MI0019151\_1;accession\_number=MI0019151;Name=hsa-mir-5591  
Total reads = 0



**C) PPB Case 14 tumor miRNA sequencing**  
ID=MI0019151\_1;accession\_number=MI0019151;Name=hsa-mir-5591  
Total reads = 0



**D) PPB Case 14 cell line miRNA sequencing**  
ID=MI0019151\_1;accession\_number=MI0019151;Name=hsa-mir-5591  
Total reads = 0



**B) Normal fibroblast miRNA sequencing**  
ID=MI0017450\_1;accession\_number=MI0017450;Name=hsa-mir-4802  
Total reads = 0



**C) PPB Case 14 tumor miRNA sequencing**  
ID=MI0017450\_1;accession\_number=MI0017450;Name=hsa-mir-4802  
Total reads = 0



**D) PPB Case 14 cell line miRNA sequencing**  
ID=MI0017450\_1;accession\_number=MI0017450;Name=hsa-mir-4802  
Total reads = 0



**B) Normal fibroblast miRNA sequencing**  
ID=MI0016792\_1;accession\_number=MI0016792;Name=hsa-mir-4449  
Total reads = 0



**C) PPB Case 14 tumor miRNA sequencing**  
ID=MI0016792\_1;accession\_number=MI0016792;Name=hsa-mir-4449  
Total reads = 1



**D) PPB Case 14 cell line miRNA sequencing**  
ID=MI0016792\_1;accession\_number=MI0016792;Name=hsa-mir-4449  
Total reads = 0



**B) Normal fibroblast miRNA sequencing**  
ID=MI0016793\_1;accession\_number=MI0016793;Name=hsa-mir-548ag-1  
Total reads = 0



**C) PPB Case 14 tumor miRNA sequencing**  
ID=MI0016793\_1;accession\_number=MI0016793;Name=hsa-mir-548ag-1  
Total reads = 0



**D) PPB Case 14 cell line miRNA sequencing**  
ID=MI0016793\_1;accession\_number=MI0016793;Name=hsa-mir-548ag-1  
Total reads = 0



**B) Normal fibroblast miRNA sequencing**  
ID=MI0006406\_1;accession\_number=MI0006406;Name=hsa-mir-1269a  
Total reads = 0



**C) PPB Case 14 tumor miRNA sequencing**  
ID=MI0006406\_1;accession\_number=MI0006406;Name=hsa-mir-1269a  
Total reads = 0



**D) PPB Case 14 cell line miRNA sequencing**  
ID=MI0006406\_1;accession\_number=MI0006406;Name=hsa-mir-1269a  
Total reads = 0





**B) Normal fibroblast miRNA sequencing**  
ID=MI0016795\_1;accession\_number=MI0016795;Name=hsa-mir-4450  
Total reads = 0



**C) PPB Case 14 tumor miRNA sequencing**  
ID=MI0016795\_1;accession\_number=MI0016795;Name=hsa-mir-4450  
Total reads = 0



**D) PPB Case 14 cell line miRNA sequencing**  
ID=MI0016795\_1;accession\_number=MI0016795;Name=hsa-mir-4450  
Total reads = 0



**B) Normal fibroblast miRNA sequencing**  
ID=MI0016796\_1;accession\_number=MI0016796;Name=hsa-mir-548ah  
Total reads = 0



**C) PPB Case 14 tumor miRNA sequencing**  
ID=MI0016796\_1;accession\_number=MI0016796;Name=hsa-mir-548ah  
Total reads = 0



**D) PPB Case 14 cell line miRNA sequencing**  
ID=MI0016796\_1;accession\_number=MI0016796;Name=hsa-mir-548ah  
Total reads = 0



**B) Normal fibroblast miRNA sequencing**  
ID=MI0018004\_1;accession\_number=MI0018004;Name=hsa-mir-5096  
Total reads = 0



**C) PPB Case 14 tumor miRNA sequencing**  
ID=MI0018004\_1;accession\_number=MI0018004;Name=hsa-mir-5096  
Total reads = 0



**D) PPB Case 14 cell line miRNA sequencing**  
ID=MI0018004\_1;accession\_number=MI0018004;Name=hsa-mir-5096  
Total reads = 0



**B) Normal fibroblast miRNA sequencing**  
ID=MI0003582\_1;accession\_number=MI0003582;Name=hsa-mir-575  
Total reads = 0



**C) PPB Case 14 tumor miRNA sequencing**  
ID=MI0003582\_1;accession\_number=MI0003582;Name=hsa-mir-575  
Total reads = 0



**D) PPB Case 14 cell line miRNA sequencing**  
ID=MI0003582\_1;accession\_number=MI0003582;Name=hsa-mir-575  
Total reads = 0



**B) Normal fibroblast miRNA sequencing**  
ID=MI0016797\_1;accession\_number=MI0016797;Name=hsa-mir-4451  
Total reads = 0



**C) PPB Case 14 tumor miRNA sequencing**  
ID=MI0016797\_1;accession\_number=MI0016797;Name=hsa-mir-4451  
Total reads = 0



**D) PPB Case 14 cell line miRNA sequencing**  
ID=MI0016797\_1;accession\_number=MI0016797;Name=hsa-mir-4451  
Total reads = 0



**B) Normal fibroblast miRNA sequencing**  
ID=MI0016798\_1;accession\_number=MI0016798;Name=hsa-mir-4452  
Total reads = 0



**C) PPB Case 14 tumor miRNA sequencing**  
ID=MI0016798\_1;accession\_number=MI0016798;Name=hsa-mir-4452  
Total reads = 0



**D) PPB Case 14 cell line miRNA sequencing**  
ID=MI0016798\_1;accession\_number=MI0016798;Name=hsa-mir-4452  
Total reads = 0



**B) Normal fibroblast miRNA sequencing**  
ID=MI0019313\_1;accession\_number=MI0019313;Name=hsa-mir-5705  
Total reads = 0



**C) PPB Case 14 tumor miRNA sequencing**  
ID=MI0019313\_1;accession\_number=MI0019313;Name=hsa-mir-5705  
Total reads = 0



**D) PPB Case 14 cell line miRNA sequencing**  
ID=MI0019313\_1;accession\_number=MI0019313;Name=hsa-mir-5705  
Total reads = 0



**B) Normal fibroblast miRNA sequencing**  
ID=MI0016085\_1;accession\_number=MI0016085;Name=hsa-mir-3684  
Total reads = 0



**C) PPB Case 14 tumor miRNA sequencing**  
ID=MI0016085\_1;accession\_number=MI0016085;Name=hsa-mir-3684  
Total reads = 0



**D) PPB Case 14 cell line miRNA sequencing**  
ID=MI0016085\_1;accession\_number=MI0016085;Name=hsa-mir-3684  
Total reads = 0





**B) Normal fibroblast miRNA sequencing**  
ID=MI0006389\_1;accession\_number=MI0006389;Name=hsa-mir-1255a  
Total reads = 0



**C) PPB Case 14 tumor miRNA sequencing**  
ID=MI0006389\_1;accession\_number=MI0006389;Name=hsa-mir-1255a  
Total reads = 0



**D) PPB Case 14 cell line miRNA sequencing**  
ID=MI0006389\_1;accession\_number=MI0006389;Name=hsa-mir-1255a  
Total reads = 0



**B) Normal fibroblast miRNA sequencing**  
ID=MI0005775\_1;accession\_number=MI0005775;Name=hsa-mir-297  
Total reads = 0



**C) PPB Case 14 tumor miRNA sequencing**  
ID=MI0005775\_1;accession\_number=MI0005775;Name=hsa-mir-297  
Total reads = 0



**D) PPB Case 14 cell line miRNA sequencing**  
ID=MI0005775\_1;accession\_number=MI0005775;Name=hsa-mir-297  
Total reads = 0



**B) Normal fibroblast miRNA sequencing**  
ID=MI0000775\_1;accession\_number=MI0000775;Name=hsa-mir-367  
Total reads = 0



**C) PPB Case 14 tumor miRNA sequencing**  
ID=MI0000775\_1;accession\_number=MI0000775;Name=hsa-mir-367  
Total reads = 0



**D) PPB Case 14 cell line miRNA sequencing**  
ID=MI0000775\_1;accession\_number=MI0000775;Name=hsa-mir-367  
Total reads = 0



**B) Normal fibroblast miRNA sequencing**  
ID=MI0000774\_1;accession\_number=MI0000774;Name=hsa-mir-302d  
Total reads = 0



**C) PPB Case 14 tumor miRNA sequencing**  
ID=MI0000774\_1;accession\_number=MI0000774;Name=hsa-mir-302d  
Total reads = 0



**D) PPB Case 14 cell line miRNA sequencing**  
ID=MI0000774\_1;accession\_number=MI0000774;Name=hsa-mir-302d  
Total reads = 0



**B) Normal fibroblast miRNA sequencing**  
ID=MI0000738\_1;accession\_number=MI0000738;Name=hsa-mir-302a  
Total reads = 0



**C) PPB Case 14 tumor miRNA sequencing**  
ID=MI0000738\_1;accession\_number=MI0000738;Name=hsa-mir-302a  
Total reads = 0



**D) PPB Case 14 cell line miRNA sequencing**  
ID=MI0000738\_1;accession\_number=MI0000738;Name=hsa-mir-302a  
Total reads = 0



**B) Normal fibroblast miRNA sequencing**  
ID=MI0000773\_1;accession\_number=MI0000773;Name=hsa-mir-302c  
Total reads = 0



**C) PPB Case 14 tumor miRNA sequencing**  
ID=MI0000773\_1;accession\_number=MI0000773;Name=hsa-mir-302c  
Total reads = 0



**D) PPB Case 14 cell line miRNA sequencing**  
ID=MI0000773\_1;accession\_number=MI0000773;Name=hsa-mir-302c  
Total reads = 0



**B) Normal fibroblast miRNA sequencing**  
ID=MI0000772\_1;accession\_number=MI0000772;Name=hsa-mir-302b  
Total reads = 0



**C) PPB Case 14 tumor miRNA sequencing**  
ID=MI0000772\_1;accession\_number=MI0000772;Name=hsa-mir-302b  
Total reads = 0



**D) PPB Case 14 cell line miRNA sequencing**  
ID=MI0000772\_1;accession\_number=MI0000772;Name=hsa-mir-302b  
Total reads = 0



**B) Normal fibroblast miRNA sequencing**  
ID=MI0006373\_1;accession\_number=MI0006373;Name=hsa-mir-1243  
Total reads = 0



**C) PPB Case 14 tumor miRNA sequencing**  
ID=MI0006373\_1;accession\_number=MI0006373;Name=hsa-mir-1243  
Total reads = 0



**D) PPB Case 14 cell line miRNA sequencing**  
ID=MI0006373\_1;accession\_number=MI0006373;Name=hsa-mir-1243  
Total reads = 0





**B) Normal fibroblast miRNA sequencing**  
ID=MI0003584\_1;accession\_number=MI0003584;Name=hsa-mir-577  
Total reads = 0



**C) PPB Case 14 tumor miRNA sequencing**  
ID=MI0003584\_1;accession\_number=MI0003584;Name=hsa-mir-577  
Total reads = 0



**D) PPB Case 14 cell line miRNA sequencing**  
ID=MI0003584\_1;accession\_number=MI0003584;Name=hsa-mir-577  
Total reads = 0



**B) Normal fibroblast miRNA sequencing**  
ID=MI0009983\_1;accession\_number=MI0009983;Name=hsa-mir-1973  
Total reads = 0



**C) PPB Case 14 tumor miRNA sequencing**  
ID=MI0009983\_1;accession\_number=MI0009983;Name=hsa-mir-1973  
Total reads = 0



**D) PPB Case 14 cell line miRNA sequencing**  
ID=MI0009983\_1;accession\_number=MI0009983;Name=hsa-mir-1973  
Total reads = 0



**B) Normal fibroblast miRNA sequencing**  
ID=MI0010488\_1;accession\_number=MI0010488;Name=hsa-mir-2054  
Total reads = 0



**C) PPB Case 14 tumor miRNA sequencing**  
ID=MI0010488\_1;accession\_number=MI0010488;Name=hsa-mir-2054  
Total reads = 0



**D) PPB Case 14 cell line miRNA sequencing**  
ID=MI0010488\_1;accession\_number=MI0010488;Name=hsa-mir-2054  
Total reads = 0



**B) Normal fibroblast miRNA sequencing**  
ID=MI0014162\_1;accession\_number=MI0014162;Name=hsa-mir-3139  
Total reads = 0



**C) PPB Case 14 tumor miRNA sequencing**  
ID=MI0014162\_1;accession\_number=MI0014162;Name=hsa-mir-3139  
Total reads = 0



**D) PPB Case 14 cell line miRNA sequencing**  
ID=MI0014162\_1;accession\_number=MI0014162;Name=hsa-mir-3139  
Total reads = 0



**B) Normal fibroblast miRNA sequencing**  
ID=MI0006395\_1;accession\_number=MI0006395;Name=hsa-mir-548g  
Total reads = 0



**C) PPB Case 14 tumor miRNA sequencing**  
ID=MI0006395\_1;accession\_number=MI0006395;Name=hsa-mir-548g  
Total reads = 0



**D) PPB Case 14 cell line miRNA sequencing**  
ID=MI0006395\_1;accession\_number=MI0006395;Name=hsa-mir-548g  
Total reads = 0



**B) Normal fibroblast miRNA sequencing**  
ID=MI0017446\_1;accession\_number=MI0017446;Name=hsa-mir-4799  
Total reads = 0



**C) PPB Case 14 tumor miRNA sequencing**  
ID=MI0017446\_1;accession\_number=MI0017446;Name=hsa-mir-4799  
Total reads = 0



**D) PPB Case 14 cell line miRNA sequencing**  
ID=MI0017446\_1;accession\_number=MI0017446;Name=hsa-mir-4799  
Total reads = 0



**B) Normal fibroblast miRNA sequencing**  
ID=MI0014163\_1;accession\_number=MI0014163;Name=hsa-mir-3140  
Total reads = 0



**C) PPB Case 14 tumor miRNA sequencing**  
ID=MI0014163\_1;accession\_number=MI0014163;Name=hsa-mir-3140  
Total reads = 0



**D) PPB Case 14 cell line miRNA sequencing**  
ID=MI0014163\_1;accession\_number=MI0014163;Name=hsa-mir-3140  
Total reads = 0



**B) Normal fibroblast miRNA sequencing**  
ID=MI0016799\_1;accession\_number=MI0016799;Name=hsa-mir-4453  
Total reads = 0



**C) PPB Case 14 tumor miRNA sequencing**  
ID=MI0016799\_1;accession\_number=MI0016799;Name=hsa-mir-4453  
Total reads = 0



**D) PPB Case 14 cell line miRNA sequencing**  
ID=MI0016799\_1;accession\_number=MI0016799;Name=hsa-mir-4453  
Total reads = 0





**B) Normal fibroblast miRNA sequencing**  
ID=MI0016089\_1;accession\_number=MI0016089;Name=hsa-mir-3688-1  
Total reads = 0



**C) PPB Case 14 tumor miRNA sequencing**  
ID=MI0016089\_1;accession\_number=MI0016089;Name=hsa-mir-3688-1  
Total reads = 0



**D) PPB Case 14 cell line miRNA sequencing**  
ID=MI0016089\_1;accession\_number=MI0016089;Name=hsa-mir-3688-1  
Total reads = 0



**B) Normal fibroblast miRNA sequencing**  
ID=MI0017447\_1;accession\_number=MI0017447;Name=hsa-mir-3688-2  
Total reads = 0



**C) PPB Case 14 tumor miRNA sequencing**  
ID=MI0017447\_1;accession\_number=MI0017447;Name=hsa-mir-3688-2  
Total reads = 0



**D) PPB Case 14 cell line miRNA sequencing**  
ID=MI0017447\_1;accession\_number=MI0017447;Name=hsa-mir-3688-2  
Total reads = 0



**B) Normal fibroblast miRNA sequencing**  
ID=MI0016800\_1;accession\_number=MI0016800;Name=hsa-mir-4454  
Total reads = 0



**C) PPB Case 14 tumor miRNA sequencing**  
ID=MI0016800\_1;accession\_number=MI0016800;Name=hsa-mir-4454  
Total reads = 0



**D) PPB Case 14 cell line miRNA sequencing**  
ID=MI0016800\_1;accession\_number=MI0016800;Name=hsa-mir-4454  
Total reads = 0



**B) Normal fibroblast miRNA sequencing**  
ID=MI0003585\_1;accession\_number=MI0003585;Name=hsa-mir-578  
Total reads = 0



**C) PPB Case 14 tumor miRNA sequencing**  
ID=MI0003585\_1;accession\_number=MI0003585;Name=hsa-mir-578  
Total reads = 0



**D) PPB Case 14 cell line miRNA sequencing**  
ID=MI0003585\_1;accession\_number=MI0003585;Name=hsa-mir-578  
Total reads = 0



**B) Normal fibroblast miRNA sequencing**  
ID=MI0020359\_1;accession\_number=MI0020359;Name=hsa-mir-6082  
Total reads = 0



**C) PPB Case 14 tumor miRNA sequencing**  
ID=MI0020359\_1;accession\_number=MI0020359;Name=hsa-mir-6082  
Total reads = 0



**D) PPB Case 14 cell line miRNA sequencing**  
ID=MI0020359\_1;accession\_number=MI0020359;Name=hsa-mir-6082  
Total reads = 0



**B) Normal fibroblast miRNA sequencing**  
ID=MI0014164\_1;accession\_number=MI0014164;Name=hsa-mir-548t  
Total reads = 0



**C) PPB Case 14 tumor miRNA sequencing**  
ID=MI0014164\_1;accession\_number=MI0014164;Name=hsa-mir-548t  
Total reads = 0



**D) PPB Case 14 cell line miRNA sequencing**  
ID=MI0014164\_1;accession\_number=MI0014164;Name=hsa-mir-548t  
Total reads = 0



**B) Normal fibroblast miRNA sequencing**  
ID=MI0015882\_1;accession\_number=MI0015882;Name=hsa-mir-4276  
Total reads = 0



**C) PPB Case 14 tumor miRNA sequencing**  
ID=MI0015882\_1;accession\_number=MI0015882;Name=hsa-mir-4276  
Total reads = 0



**D) PPB Case 14 cell line miRNA sequencing**  
ID=MI0015882\_1;accession\_number=MI0015882;Name=hsa-mir-4276  
Total reads = 0



**B) Normal fibroblast miRNA sequencing**  
ID=MI0006372\_1;accession\_number=MI0006372;Name=hsa-mir-1305  
Total reads = 0



**C) PPB Case 14 tumor miRNA sequencing**  
ID=MI0006372\_1;accession\_number=MI0006372;Name=hsa-mir-1305  
Total reads = 0



**D) PPB Case 14 cell line miRNA sequencing**  
ID=MI0006372\_1;accession\_number=MI0006372;Name=hsa-mir-1305  
Total reads = 0





**B) Normal fibroblast miRNA sequencing**  
ID=MI0016602\_1;accession\_number=MI0016602;Name=hsa-mir-3945  
Total reads = 0



**C) PPB Case 14 tumor miRNA sequencing**  
ID=MI0016602\_1;accession\_number=MI0016602;Name=hsa-mir-3945  
Total reads = 0



**D) PPB Case 14 cell line miRNA sequencing**  
ID=MI0016602\_1;accession\_number=MI0016602;Name=hsa-mir-3945  
Total reads = 0



**B) Normal fibroblast miRNA sequencing**  
ID=MI0016801\_1;accession\_number=MI0016801;Name=hsa-mir-4455  
Total reads = 0



**C) PPB Case 14 tumor miRNA sequencing**  
ID=MI0016801\_1;accession\_number=MI0016801;Name=hsa-mir-4455  
Total reads = 0

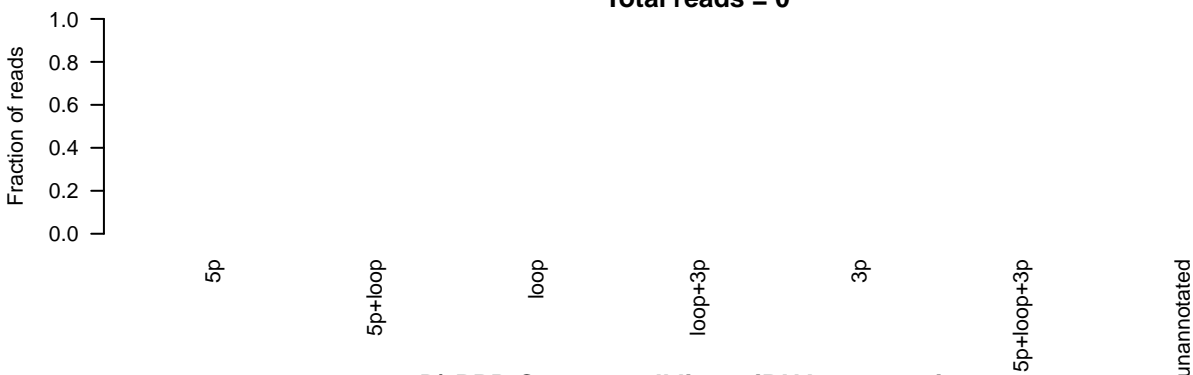

**D) PPB Case 14 cell line miRNA sequencing**  
ID=MI0016801\_1;accession\_number=MI0016801;Name=hsa-mir-4455  
Total reads = 0



**B) Normal fibroblast miRNA sequencing**  
ID=MI0016802\_1;accession\_number=MI0016802;Name=hsa-mir-4456  
Total reads = 0



**C) PPB Case 14 tumor miRNA sequencing**  
ID=MI0016802\_1;accession\_number=MI0016802;Name=hsa-mir-4456  
Total reads = 0



**D) PPB Case 14 cell line miRNA sequencing**  
ID=MI0016802\_1;accession\_number=MI0016802;Name=hsa-mir-4456  
Total reads = 0



**B) Normal fibroblast miRNA sequencing**  
ID=MI0017262\_1;accession\_number=MI0017262;Name=hsa-mir-4635  
Total reads = 0



**C) PPB Case 14 tumor miRNA sequencing**  
ID=MI0017262\_1;accession\_number=MI0017262;Name=hsa-mir-4635  
Total reads = 0



**D) PPB Case 14 cell line miRNA sequencing**  
ID=MI0017262\_1;accession\_number=MI0017262;Name=hsa-mir-4635  
Total reads = 0



**B) Normal fibroblast miRNA sequencing**  
ID=MI0016803\_1;accession\_number=MI0016803;Name=hsa-mir-4457  
Total reads = 0



**C) PPB Case 14 tumor miRNA sequencing**  
ID=MI0016803\_1;accession\_number=MI0016803;Name=hsa-mir-4457  
Total reads = 0



**D) PPB Case 14 cell line miRNA sequencing**  
ID=MI0016803\_1;accession\_number=MI0016803;Name=hsa-mir-4457  
Total reads = 0



**B) Normal fibroblast miRNA sequencing**  
ID=MI0020352\_1;accession\_number=MI0020352;Name=hsa-mir-6075  
Total reads = 0



**C) PPB Case 14 tumor miRNA sequencing**  
ID=MI0020352\_1;accession\_number=MI0020352;Name=hsa-mir-6075  
Total reads = 2



**D) PPB Case 14 cell line miRNA sequencing**  
ID=MI0020352\_1;accession\_number=MI0020352;Name=hsa-mir-6075  
Total reads = 0



**B) Normal fibroblast miRNA sequencing**  
ID=MI0015886\_1;accession\_number=MI0015886;Name=hsa-mir-4277  
Total reads = 0



**C) PPB Case 14 tumor miRNA sequencing**  
ID=MI0015886\_1;accession\_number=MI0015886;Name=hsa-mir-4277  
Total reads = 0



**D) PPB Case 14 cell line miRNA sequencing**  
ID=MI0015886\_1;accession\_number=MI0015886;Name=hsa-mir-4277  
Total reads = 0



**B) Normal fibroblast miRNA sequencing**  
ID=MI0015888\_1;accession\_number=MI0015888;Name=hsa-mir-4278  
Total reads = 0



**C) PPB Case 14 tumor miRNA sequencing**  
ID=MI0015888\_1;accession\_number=MI0015888;Name=hsa-mir-4278  
Total reads = 0



**D) PPB Case 14 cell line miRNA sequencing**  
ID=MI0015888\_1;accession\_number=MI0015888;Name=hsa-mir-4278  
Total reads = 0





**B) Normal fibroblast miRNA sequencing**  
ID=MI0016804\_1;accession\_number=MI0016804;Name=hsa-mir-4458  
Total reads = 0



**C) PPB Case 14 tumor miRNA sequencing**  
ID=MI0016804\_1;accession\_number=MI0016804;Name=hsa-mir-4458  
Total reads = 0



**D) PPB Case 14 cell line miRNA sequencing**  
ID=MI0016804\_1;accession\_number=MI0016804;Name=hsa-mir-4458  
Total reads = 0



**B) Normal fibroblast miRNA sequencing**  
ID=MI0017263\_1;accession\_number=MI0017263;Name=hsa-mir-4636  
Total reads = 0



**C) PPB Case 14 tumor miRNA sequencing**  
ID=MI0017263\_1;accession\_number=MI0017263;Name=hsa-mir-4636  
Total reads = 0



**D) PPB Case 14 cell line miRNA sequencing**  
ID=MI0017263\_1;accession\_number=MI0017263;Name=hsa-mir-4636  
Total reads = 0



**B) Normal fibroblast miRNA sequencing**  
ID=MI0021276\_1;accession\_number=MI0021276;Name=hsa-mir-6131  
Total reads = 0



**C) PPB Case 14 tumor miRNA sequencing**  
ID=MI0021276\_1;accession\_number=MI0021276;Name=hsa-mir-6131  
Total reads = 0



**D) PPB Case 14 cell line miRNA sequencing**  
ID=MI0021276\_1;accession\_number=MI0021276;Name=hsa-mir-6131  
Total reads = 0



**B) Normal fibroblast miRNA sequencing**  
ID=MI0017264\_1;accession\_number=MI0017264;Name=hsa-mir-4637  
Total reads = 0



**C) PPB Case 14 tumor miRNA sequencing**  
ID=MI0017264\_1;accession\_number=MI0017264;Name=hsa-mir-4637  
Total reads = 0



**D) PPB Case 14 cell line miRNA sequencing**  
ID=MI0017264\_1;accession\_number=MI0017264;Name=hsa-mir-4637  
Total reads = 0



**B) Normal fibroblast miRNA sequencing**  
ID=MI0015887\_1;accession\_number=MI0015887;Name=hsa-mir-4279  
Total reads = 0



**C) PPB Case 14 tumor miRNA sequencing**  
ID=MI0015887\_1;accession\_number=MI0015887;Name=hsa-mir-4279  
Total reads = 0



**D) PPB Case 14 cell line miRNA sequencing**  
ID=MI0015887\_1;accession\_number=MI0015887;Name=hsa-mir-4279  
Total reads = 0



**B) Normal fibroblast miRNA sequencing**  
ID=MI0003586\_1;accession\_number=MI0003586;Name=hsa-mir-579  
Total reads = 0



**C) PPB Case 14 tumor miRNA sequencing**  
ID=MI0003586\_1;accession\_number=MI0003586;Name=hsa-mir-579  
Total reads = 0



**D) PPB Case 14 cell line miRNA sequencing**  
ID=MI0003586\_1;accession\_number=MI0003586;Name=hsa-mir-579  
Total reads = 0



**B) Normal fibroblast miRNA sequencing**  
ID=MI0003587\_1;accession\_number=MI0003587;Name=hsa-mir-580  
Total reads = 0



**C) PPB Case 14 tumor miRNA sequencing**  
ID=MI0003587\_1;accession\_number=MI0003587;Name=hsa-mir-580  
Total reads = 0



**D) PPB Case 14 cell line miRNA sequencing**  
ID=MI0003587\_1;accession\_number=MI0003587;Name=hsa-mir-580  
Total reads = 0



**B) Normal fibroblast miRNA sequencing**  
ID=MI0016050\_1;accession\_number=MI0016050;Name=hsa-mir-3650  
Total reads = 0



**C) PPB Case 14 tumor miRNA sequencing**  
ID=MI0016050\_1;accession\_number=MI0016050;Name=hsa-mir-3650  
Total reads = 0



**D) PPB Case 14 cell line miRNA sequencing**  
ID=MI0016050\_1;accession\_number=MI0016050;Name=hsa-mir-3650  
Total reads = 0





**B) Normal fibroblast miRNA sequencing**  
ID=MI0003588\_1;accession\_number=MI0003588;Name=hsa-mir-581  
Total reads = 0



**C) PPB Case 14 tumor miRNA sequencing**  
ID=MI0003588\_1;accession\_number=MI0003588;Name=hsa-mir-581  
Total reads = 0



**D) PPB Case 14 cell line miRNA sequencing**  
ID=MI0003588\_1;accession\_number=MI0003588;Name=hsa-mir-581  
Total reads = 0



**B) Normal fibroblast miRNA sequencing**  
ID=MI0016805\_1;accession\_number=MI0016805;Name=hsa-mir-4459  
Total reads = 0



**C) PPB Case 14 tumor miRNA sequencing**  
ID=MI0016805\_1;accession\_number=MI0016805;Name=hsa-mir-4459  
Total reads = 0



**D) PPB Case 14 cell line miRNA sequencing**  
ID=MI0016805\_1;accession\_number=MI0016805;Name=hsa-mir-4459  
Total reads = 0



**B) Normal fibroblast miRNA sequencing**  
ID=MI0001648\_1;accession\_number=MI0001648;Name=hsa-mir-449a  
Total reads = 0



**C) PPB Case 14 tumor miRNA sequencing**  
ID=MI0001648\_1;accession\_number=MI0001648;Name=hsa-mir-449a  
Total reads = 0



**D) PPB Case 14 cell line miRNA sequencing**  
ID=MI0001648\_1;accession\_number=MI0001648;Name=hsa-mir-449a  
Total reads = 0



**B) Normal fibroblast miRNA sequencing**  
ID=MI0003823\_1;accession\_number=MI0003823;Name=hsa-mir-449c  
Total reads = 0



**C) PPB Case 14 tumor miRNA sequencing**  
ID=MI0003823\_1;accession\_number=MI0003823;Name=hsa-mir-449c  
Total reads = 0



**D) PPB Case 14 cell line miRNA sequencing**  
ID=MI0003823\_1;accession\_number=MI0003823;Name=hsa-mir-449c  
Total reads = 0



**B) Normal fibroblast miRNA sequencing**  
ID=MI0019291\_1;accession\_number=MI0019291;Name=hsa-mir-5687  
Total reads = 0



**C) PPB Case 14 tumor miRNA sequencing**  
ID=MI0019291\_1;accession\_number=MI0019291;Name=hsa-mir-5687  
Total reads = 0



**D) PPB Case 14 cell line miRNA sequencing**  
ID=MI0019291\_1;accession\_number=MI0019291;Name=hsa-mir-5687  
Total reads = 0



**B) Normal fibroblast miRNA sequencing**  
ID=MI0016780\_1;accession\_number=MI0016780;Name=hsa-mir-548ae-2  
Total reads = 0



**C) PPB Case 14 tumor miRNA sequencing**  
ID=MI0016780\_1;accession\_number=MI0016780;Name=hsa-mir-548ae-2  
Total reads = 0



**D) PPB Case 14 cell line miRNA sequencing**  
ID=MI0016780\_1;accession\_number=MI0016780;Name=hsa-mir-548ae-2  
Total reads = 0



**B) Normal fibroblast miRNA sequencing**  
ID=MI0003589\_1;accession\_number=MI0003589;Name=hsa-mir-582  
Total reads = 0



**C) PPB Case 14 tumor miRNA sequencing**  
ID=MI0003589\_1;accession\_number=MI0003589;Name=hsa-mir-582  
Total reads = 1



**D) PPB Case 14 cell line miRNA sequencing**  
ID=MI0003589\_1;accession\_number=MI0003589;Name=hsa-mir-582  
Total reads = 0



**B) Normal fibroblast miRNA sequencing**  
ID=MI0017451\_1;accession\_number=MI0017451;Name=hsa-mir-4803  
Total reads = 0



**C) PPB Case 14 tumor miRNA sequencing**  
ID=MI0017451\_1;accession\_number=MI0017451;Name=hsa-mir-4803  
Total reads = 0



**D) PPB Case 14 cell line miRNA sequencing**  
ID=MI0017451\_1;accession\_number=MI0017451;Name=hsa-mir-4803  
Total reads = 0





**B) Normal fibroblast miRNA sequencing**  
ID=MI0017452\_1;accession\_number=MI0017452;Name=hsa-mir-4804  
Total reads = 0



**C) PPB Case 14 tumor miRNA sequencing**  
ID=MI0017452\_1;accession\_number=MI0017452;Name=hsa-mir-4804  
Total reads = 0



**D) PPB Case 14 cell line miRNA sequencing**  
ID=MI0017452\_1;accession\_number=MI0017452;Name=hsa-mir-4804  
Total reads = 0



**B) Normal fibroblast miRNA sequencing**  
ID=MI0016995\_1;accession\_number=MI0016995;Name=hsa-mir-3977  
Total reads = 0



**C) PPB Case 14 tumor miRNA sequencing**  
ID=MI0016995\_1;accession\_number=MI0016995;Name=hsa-mir-3977  
Total reads = 0



**D) PPB Case 14 cell line miRNA sequencing**  
ID=MI0016995\_1;accession\_number=MI0016995;Name=hsa-mir-3977  
Total reads = 0



**B) Normal fibroblast miRNA sequencing**  
ID=MI0015889\_1;accession\_number=MI0015889;Name=hsa-mir-4280  
Total reads = 0



**C) PPB Case 14 tumor miRNA sequencing**  
ID=MI0015889\_1;accession\_number=MI0015889;Name=hsa-mir-4280  
Total reads = 0



**D) PPB Case 14 cell line miRNA sequencing**  
ID=MI0015889\_1;accession\_number=MI0015889;Name=hsa-mir-4280  
Total reads = 0



**B) Normal fibroblast miRNA sequencing**  
ID=MI0000467\_1;accession\_number=MI0000467;Name=hsa-mir-9-2  
Total reads = 0



**C) PPB Case 14 tumor miRNA sequencing**  
ID=MI0000467\_1;accession\_number=MI0000467;Name=hsa-mir-9-2  
Total reads = 0



**D) PPB Case 14 cell line miRNA sequencing**  
ID=MI0000467\_1;accession\_number=MI0000467;Name=hsa-mir-9-2  
Total reads = 0



**B) Normal fibroblast miRNA sequencing**  
ID=MI0016061\_1;accession\_number=MI0016061;Name=hsa-mir-3660  
Total reads = 0



**C) PPB Case 14 tumor miRNA sequencing**  
ID=MI0016061\_1;accession\_number=MI0016061;Name=hsa-mir-3660  
Total reads = 0



**D) PPB Case 14 cell line miRNA sequencing**  
ID=MI0016061\_1;accession\_number=MI0016061;Name=hsa-mir-3660  
Total reads = 0



**B) Normal fibroblast miRNA sequencing**  
ID=MI0003590\_1;accession\_number=MI0003590;Name=hsa-mir-583  
Total reads = 0



**C) PPB Case 14 tumor miRNA sequencing**  
ID=MI0003590\_1;accession\_number=MI0003590;Name=hsa-mir-583  
Total reads = 0



**D) PPB Case 14 cell line miRNA sequencing**  
ID=MI0003590\_1;accession\_number=MI0003590;Name=hsa-mir-583  
Total reads = 0



**B) Normal fibroblast miRNA sequencing**  
ID=MI0006420\_1;accession\_number=MI0006420;Name=hsa-mir-548p  
Total reads = 0



**C) PPB Case 14 tumor miRNA sequencing**  
ID=MI0006420\_1;accession\_number=MI0006420;Name=hsa-mir-548p  
Total reads = 0



**D) PPB Case 14 cell line miRNA sequencing**  
ID=MI0006420\_1;accession\_number=MI0006420;Name=hsa-mir-548p  
Total reads = 0



**B) Normal fibroblast miRNA sequencing**  
ID=MI0006376\_1;accession\_number=MI0006376;Name=hsa-mir-548f-3  
Total reads = 0



**C) PPB Case 14 tumor miRNA sequencing**  
ID=MI0006376\_1;accession\_number=MI0006376;Name=hsa-mir-548f-3  
Total reads = 0



**D) PPB Case 14 cell line miRNA sequencing**  
ID=MI0006376\_1;accession\_number=MI0006376;Name=hsa-mir-548f-3  
Total reads = 0





**B) Normal fibroblast miRNA sequencing**  
ID=MI0019314\_1;accession\_number=MI0019314;Name=hsa-mir-5706  
Total reads = 0



**C) PPB Case 14 tumor miRNA sequencing**  
ID=MI0019314\_1;accession\_number=MI0019314;Name=hsa-mir-5706  
Total reads = 0



**D) PPB Case 14 cell line miRNA sequencing**  
ID=MI0019314\_1;accession\_number=MI0019314;Name=hsa-mir-5706  
Total reads = 0



**B) Normal fibroblast miRNA sequencing**  
ID=MI0017260\_1;accession\_number=MI0017260;Name=hsa-mir-4633  
Total reads = 0



**C) PPB Case 14 tumor miRNA sequencing**  
ID=MI0017260\_1;accession\_number=MI0017260;Name=hsa-mir-4633  
Total reads = 0



**D) PPB Case 14 cell line miRNA sequencing**  
ID=MI0017260\_1;accession\_number=MI0017260;Name=hsa-mir-4633  
Total reads = 0



**B) Normal fibroblast miRNA sequencing**  
ID=MI0016806\_1;accession\_number=MI0016806;Name=hsa-mir-4460  
Total reads = 0



**C) PPB Case 14 tumor miRNA sequencing**  
ID=MI0016806\_1;accession\_number=MI0016806;Name=hsa-mir-4460  
Total reads = 0



**D) PPB Case 14 cell line miRNA sequencing**  
ID=MI0016806\_1;accession\_number=MI0016806;Name=hsa-mir-4460  
Total reads = 0



**B) Normal fibroblast miRNA sequencing**  
ID=MI0016592\_1;accession\_number=MI0016592;Name=hsa-mir-3936  
Total reads = 0



**C) PPB Case 14 tumor miRNA sequencing**  
ID=MI0016592\_1;accession\_number=MI0016592;Name=hsa-mir-3936  
Total reads = 0



**D) PPB Case 14 cell line miRNA sequencing**  
ID=MI0016592\_1;accession\_number=MI0016592;Name=hsa-mir-3936  
Total reads = 0



**B) Normal fibroblast miRNA sequencing**  
ID=MI0006351\_1;accession\_number=MI0006351;Name=hsa-mir-1289-2  
Total reads = 0



**C) PPB Case 14 tumor miRNA sequencing**  
ID=MI0006351\_1;accession\_number=MI0006351;Name=hsa-mir-1289-2  
Total reads = 0



**D) PPB Case 14 cell line miRNA sequencing**  
ID=MI0006351\_1;accession\_number=MI0006351;Name=hsa-mir-1289-2  
Total reads = 0



**B) Normal fibroblast miRNA sequencing**  
ID=MI0016062\_1;accession\_number=MI0016062;Name=hsa-mir-3661  
Total reads = 0



**C) PPB Case 14 tumor miRNA sequencing**  
ID=MI0016062\_1;accession\_number=MI0016062;Name=hsa-mir-3661  
Total reads = 0



**D) PPB Case 14 cell line miRNA sequencing**  
ID=MI0016062\_1;accession\_number=MI0016062;Name=hsa-mir-3661  
Total reads = 0



**B) Normal fibroblast miRNA sequencing**  
ID=MI0019288\_1;accession\_number=MI0019288;Name=hsa-mir-5692c-1  
Total reads = 0



**C) PPB Case 14 tumor miRNA sequencing**  
ID=MI0019288\_1;accession\_number=MI0019288;Name=hsa-mir-5692c-1  
Total reads = 0



**D) PPB Case 14 cell line miRNA sequencing**  
ID=MI0019288\_1;accession\_number=MI0019288;Name=hsa-mir-5692c-1  
Total reads = 0



**B) Normal fibroblast miRNA sequencing**  
ID=MI0005532\_1;accession\_number=MI0005532;Name=hsa-mir-874  
Total reads = 0



**C) PPB Case 14 tumor miRNA sequencing**  
ID=MI0005532\_1;accession\_number=MI0005532;Name=hsa-mir-874  
Total reads = 0



**D) PPB Case 14 cell line miRNA sequencing**  
ID=MI0005532\_1;accession\_number=MI0005532;Name=hsa-mir-874  
Total reads = 0





**B) Normal fibroblast miRNA sequencing**  
ID=MI0016055\_1;accession\_number=MI0016055;Name=hsa-mir-3655  
Total reads = 0



**C) PPB Case 14 tumor miRNA sequencing**  
ID=MI0016055\_1;accession\_number=MI0016055;Name=hsa-mir-3655  
Total reads = 0



**D) PPB Case 14 cell line miRNA sequencing**  
ID=MI0016055\_1;accession\_number=MI0016055;Name=hsa-mir-3655  
Total reads = 0



**B) Normal fibroblast miRNA sequencing**  
ID=MI0018176\_1;accession\_number=MI0018176;Name=hsa-mir-5197  
Total reads = 0



**C) PPB Case 14 tumor miRNA sequencing**  
ID=MI0018176\_1;accession\_number=MI0018176;Name=hsa-mir-5197  
Total reads = 0



**D) PPB Case 14 cell line miRNA sequencing**  
ID=MI0018176\_1;accession\_number=MI0018176;Name=hsa-mir-5197  
Total reads = 0



**B) Normal fibroblast miRNA sequencing**  
ID=MI0000786\_1;accession\_number=MI0000786;Name=hsa-mir-378a  
Total reads = 0



**C) PPB Case 14 tumor miRNA sequencing**  
ID=MI0000786\_1;accession\_number=MI0000786;Name=hsa-mir-378a  
Total reads = 2



**D) PPB Case 14 cell line miRNA sequencing**  
ID=MI0000786\_1;accession\_number=MI0000786;Name=hsa-mir-378a  
Total reads = 0



**B) Normal fibroblast miRNA sequencing**  
ID=MI0022209\_1;accession\_number=MI0022209;Name=hsa-mir-6499  
Total reads = 0



**C) PPB Case 14 tumor miRNA sequencing**  
ID=MI0022209\_1;accession\_number=MI0022209;Name=hsa-mir-6499  
Total reads = 0



**D) PPB Case 14 cell line miRNA sequencing**  
ID=MI0022209\_1;accession\_number=MI0022209;Name=hsa-mir-6499  
Total reads = 0



**B) Normal fibroblast miRNA sequencing**  
ID=MI0006356\_1;accession\_number=MI0006356;Name=hsa-mir-1294  
Total reads = 0



**C) PPB Case 14 tumor miRNA sequencing**  
ID=MI0006356\_1;accession\_number=MI0006356;Name=hsa-mir-1294  
Total reads = 0



**D) PPB Case 14 cell line miRNA sequencing**  
ID=MI0006356\_1;accession\_number=MI0006356;Name=hsa-mir-1294  
Total reads = 0



**B) Normal fibroblast miRNA sequencing**  
ID=MI0014165\_1;accession\_number=MI0014165;Name=hsa-mir-3141  
Total reads = 0



**C) PPB Case 14 tumor miRNA sequencing**  
ID=MI0014165\_1;accession\_number=MI0014165;Name=hsa-mir-3141  
Total reads = 0



**D) PPB Case 14 cell line miRNA sequencing**  
ID=MI0014165\_1;accession\_number=MI0014165;Name=hsa-mir-3141  
Total reads = 0



**B) Normal fibroblast miRNA sequencing**  
ID=MI0006370\_1;accession\_number=MI0006370;Name=hsa-mir-1303  
Total reads = 0



**C) PPB Case 14 tumor miRNA sequencing**  
ID=MI0006370\_1;accession\_number=MI0006370;Name=hsa-mir-1303  
Total reads = 0



**D) PPB Case 14 cell line miRNA sequencing**  
ID=MI0006370\_1;accession\_number=MI0006370;Name=hsa-mir-1303  
Total reads = 0



**B) Normal fibroblast miRNA sequencing**  
ID=MI0016808\_1;accession\_number=MI0016808;Name=hsa-mir-378h  
Total reads = 0



**C) PPB Case 14 tumor miRNA sequencing**  
ID=MI0016808\_1;accession\_number=MI0016808;Name=hsa-mir-378h  
Total reads = 0



**D) PPB Case 14 cell line miRNA sequencing**  
ID=MI0016808\_1;accession\_number=MI0016808;Name=hsa-mir-378h  
Total reads = 0





**B) Normal fibroblast miRNA sequencing**  
ID=MI0014166\_1;accession\_number=MI0014166;Name=hsa-mir-3142  
Total reads = 0



**C) PPB Case 14 tumor miRNA sequencing**  
ID=MI0014166\_1;accession\_number=MI0014166;Name=hsa-mir-3142  
Total reads = 0



**D) PPB Case 14 cell line miRNA sequencing**  
ID=MI0014166\_1;accession\_number=MI0014166;Name=hsa-mir-3142  
Total reads = 0



**B) Normal fibroblast miRNA sequencing**  
ID=MI0000477\_1;accession\_number=MI0000477;Name=hsa-mir-146a  
Total reads = 0



**C) PPB Case 14 tumor miRNA sequencing**  
ID=MI0000477\_1;accession\_number=MI0000477;Name=hsa-mir-146a  
Total reads = 1

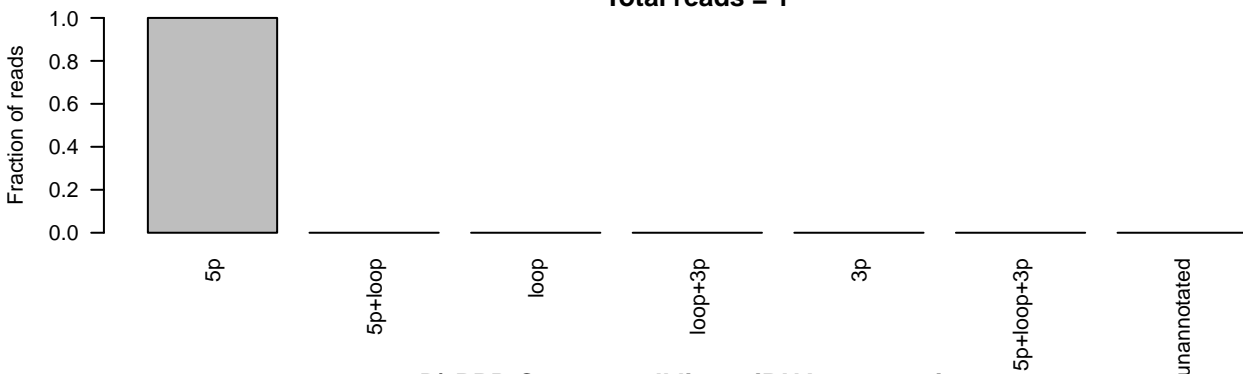

**D) PPB Case 14 cell line miRNA sequencing**  
ID=MI0000477\_1;accession\_number=MI0000477;Name=hsa-mir-146a  
Total reads = 0



**B) Normal fibroblast miRNA sequencing**  
ID=MI0003592\_1;accession\_number=MI0003592;Name=hsa-mir-585  
Total reads = 0



**C) PPB Case 14 tumor miRNA sequencing**  
ID=MI0003592\_1;accession\_number=MI0003592;Name=hsa-mir-585  
Total reads = 1

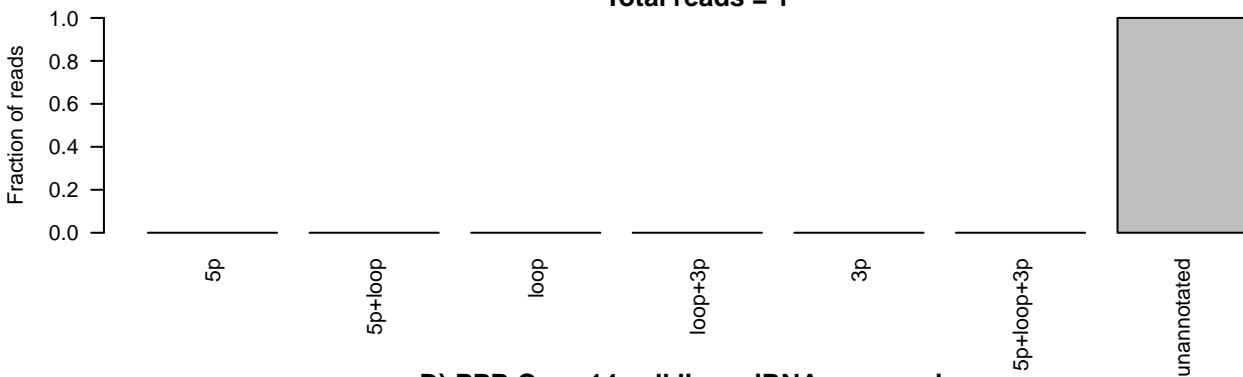

**D) PPB Case 14 cell line miRNA sequencing**  
ID=MI0003592\_1;accession\_number=MI0003592;Name=hsa-mir-585  
Total reads = 0



**B) Normal fibroblast miRNA sequencing**  
ID=MI0016750\_1;accession\_number=MI0016750;Name=hsa-mir-378e  
Total reads = 0



**C) PPB Case 14 tumor miRNA sequencing**  
ID=MI0016750\_1;accession\_number=MI0016750;Name=hsa-mir-378e  
Total reads = 0



**D) PPB Case 14 cell line miRNA sequencing**  
ID=MI0016750\_1;accession\_number=MI0016750;Name=hsa-mir-378e  
Total reads = 0



**B) Normal fibroblast miRNA sequencing**  
ID=MI0016416\_1;accession\_number=MI0016416;Name=hsa-mir-3912  
Total reads = 0



**C) PPB Case 14 tumor miRNA sequencing**  
ID=MI0016416\_1;accession\_number=MI0016416;Name=hsa-mir-3912  
Total reads = 0



**D) PPB Case 14 cell line miRNA sequencing**  
ID=MI0016416\_1;accession\_number=MI0016416;Name=hsa-mir-3912  
Total reads = 0



**B) Normal fibroblast miRNA sequencing**  
ID=MI0017869\_1;accession\_number=MI0017869;Name=hsa-mir-5003  
Total reads = 0



**C) PPB Case 14 tumor miRNA sequencing**  
ID=MI0017869\_1;accession\_number=MI0017869;Name=hsa-mir-5003  
Total reads = 0



**D) PPB Case 14 cell line miRNA sequencing**  
ID=MI0017869\_1;accession\_number=MI0017869;Name=hsa-mir-5003  
Total reads = 0



**B) Normal fibroblast miRNA sequencing**  
ID=MI0017261\_1;accession\_number=MI0017261;Name=hsa-mir-4634  
Total reads = 0



**C) PPB Case 14 tumor miRNA sequencing**  
ID=MI0017261\_1;accession\_number=MI0017261;Name=hsa-mir-4634  
Total reads = 0



**D) PPB Case 14 cell line miRNA sequencing**  
ID=MI0017261\_1;accession\_number=MI0017261;Name=hsa-mir-4634  
Total reads = 0



**B) Normal fibroblast miRNA sequencing**  
ID=MI0003814\_1;accession\_number=MI0003814;Name=hsa-mir-1271  
Total reads = 0



**C) PPB Case 14 tumor miRNA sequencing**  
ID=MI0003814\_1;accession\_number=MI0003814;Name=hsa-mir-1271  
Total reads = 0



**D) PPB Case 14 cell line miRNA sequencing**  
ID=MI0003814\_1;accession\_number=MI0003814;Name=hsa-mir-1271  
Total reads = 0





**B) Normal fibroblast miRNA sequencing**  
ID=MI0015885\_1;accession\_number=MI0015885;Name=hsa-mir-4281  
Total reads = 0



**C) PPB Case 14 tumor miRNA sequencing**  
ID=MI0015885\_1;accession\_number=MI0015885;Name=hsa-mir-4281  
Total reads = 0



**D) PPB Case 14 cell line miRNA sequencing**  
ID=MI0015885\_1;accession\_number=MI0015885;Name=hsa-mir-4281  
Total reads = 0



**B) Normal fibroblast miRNA sequencing**  
ID=MI0017265\_1;accession\_number=MI0017265;Name=hsa-mir-4638  
Total reads = 0



**C) PPB Case 14 tumor miRNA sequencing**  
ID=MI0017265\_1;accession\_number=MI0017265;Name=hsa-mir-4638  
Total reads = 0



**D) PPB Case 14 cell line miRNA sequencing**  
ID=MI0017265\_1;accession\_number=MI0017265;Name=hsa-mir-4638  
Total reads = 0



**B) Normal fibroblast miRNA sequencing**  
ID=MI0022555\_1;accession\_number=MI0022555;Name=hsa-mir-6720  
Total reads = 0



**C) PPB Case 14 tumor miRNA sequencing**  
ID=MI0022555\_1;accession\_number=MI0022555;Name=hsa-mir-6720  
Total reads = 1

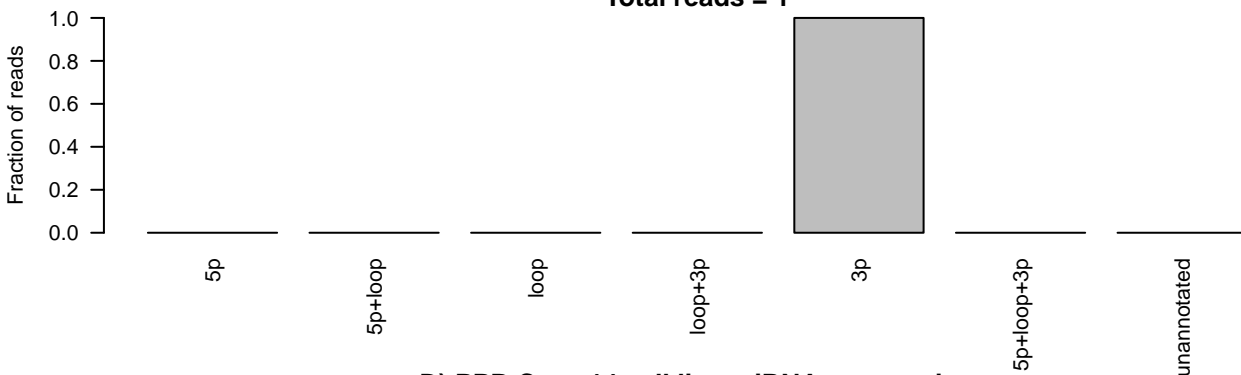

**D) PPB Case 14 cell line miRNA sequencing**  
ID=MI0022555\_1;accession\_number=MI0022555;Name=hsa-mir-6720  
Total reads = 0



**B) Normal fibroblast miRNA sequencing**  
ID=MI0017272\_1;accession\_number=MI0017272;Name=hsa-mir-4645  
Total reads = 0



**C) PPB Case 14 tumor miRNA sequencing**  
ID=MI0017272\_1;accession\_number=MI0017272;Name=hsa-mir-4645  
Total reads = 0



**D) PPB Case 14 cell line miRNA sequencing**  
ID=MI0017272\_1;accession\_number=MI0017272;Name=hsa-mir-4645  
Total reads = 0



**B) Normal fibroblast miRNA sequencing**  
ID=MI0016092\_1;accession\_number=MI0016092;Name=hsa-mir-3691  
Total reads = 0



**C) PPB Case 14 tumor miRNA sequencing**  
ID=MI0016092\_1;accession\_number=MI0016092;Name=hsa-mir-3691  
Total reads = 0



**D) PPB Case 14 cell line miRNA sequencing**  
ID=MI0016092\_1;accession\_number=MI0016092;Name=hsa-mir-3691  
Total reads = 0



**B) Normal fibroblast miRNA sequencing**  
ID=MI0019284\_1;accession\_number=MI0019284;Name=hsa-mir-5683  
Total reads = 0



**C) PPB Case 14 tumor miRNA sequencing**  
ID=MI0019284\_1;accession\_number=MI0019284;Name=hsa-mir-5683  
Total reads = 0



**D) PPB Case 14 cell line miRNA sequencing**  
ID=MI0019284\_1;accession\_number=MI0019284;Name=hsa-mir-5683  
Total reads = 0



**B) Normal fibroblast miRNA sequencing**  
ID=MI0019294\_1;accession\_number=MI0019294;Name=hsa-mir-5689  
Total reads = 0



**C) PPB Case 14 tumor miRNA sequencing**  
ID=MI0019294\_1;accession\_number=MI0019294;Name=hsa-mir-5689  
Total reads = 0



**D) PPB Case 14 cell line miRNA sequencing**  
ID=MI0019294\_1;accession\_number=MI0019294;Name=hsa-mir-5689  
Total reads = 0



**B) Normal fibroblast miRNA sequencing**  
ID=MI0017266\_1;accession\_number=MI0017266;Name=hsa-mir-4639  
Total reads = 0



**C) PPB Case 14 tumor miRNA sequencing**  
ID=MI0017266\_1;accession\_number=MI0017266;Name=hsa-mir-4639  
Total reads = 0



**D) PPB Case 14 cell line miRNA sequencing**  
ID=MI0017266\_1;accession\_number=MI0017266;Name=hsa-mir-4639  
Total reads = 0





**B) Normal fibroblast miRNA sequencing**  
ID=MI0003593\_1;accession\_number=MI0003593;Name=hsa-mir-548a-1  
Total reads = 0



**C) PPB Case 14 tumor miRNA sequencing**  
ID=MI0003593\_1;accession\_number=MI0003593;Name=hsa-mir-548a-1  
Total reads = 0



**D) PPB Case 14 cell line miRNA sequencing**  
ID=MI0003593\_1;accession\_number=MI0003593;Name=hsa-mir-548a-1  
Total reads = 0



**B) Normal fibroblast miRNA sequencing**  
ID=MI0017267\_1;accession\_number=MI0017267;Name=hsa-mir-4640  
Total reads = 0



**C) PPB Case 14 tumor miRNA sequencing**  
ID=MI0017267\_1;accession\_number=MI0017267;Name=hsa-mir-4640  
Total reads = 0



**D) PPB Case 14 cell line miRNA sequencing**  
ID=MI0017267\_1;accession\_number=MI0017267;Name=hsa-mir-4640  
Total reads = 0



**B) Normal fibroblast miRNA sequencing**  
ID=MI0017273\_1;accession\_number=MI0017273;Name=hsa-mir-4646  
Total reads = 0



**C) PPB Case 14 tumor miRNA sequencing**  
ID=MI0017273\_1;accession\_number=MI0017273;Name=hsa-mir-4646  
Total reads = 0



**D) PPB Case 14 cell line miRNA sequencing**  
ID=MI0017273\_1;accession\_number=MI0017273;Name=hsa-mir-4646  
Total reads = 0



**B) Normal fibroblast miRNA sequencing**  
ID=MI0022556\_1;accession\_number=MI0022556;Name=hsa-mir-6721  
Total reads = 0



**C) PPB Case 14 tumor miRNA sequencing**  
ID=MI0022556\_1;accession\_number=MI0022556;Name=hsa-mir-6721  
Total reads = 0



**D) PPB Case 14 cell line miRNA sequencing**  
ID=MI0022556\_1;accession\_number=MI0022556;Name=hsa-mir-6721  
Total reads = 0



**B) Normal fibroblast miRNA sequencing**  
ID=MI0016809\_1;accession\_number=MI0016809;Name=hsa-mir-3135b  
Total reads = 0



**C) PPB Case 14 tumor miRNA sequencing**  
ID=MI0016809\_1;accession\_number=MI0016809;Name=hsa-mir-3135b  
Total reads = 0



**D) PPB Case 14 cell line miRNA sequencing**  
ID=MI0016809\_1;accession\_number=MI0016809;Name=hsa-mir-3135b  
Total reads = 0



**B) Normal fibroblast miRNA sequencing**  
ID=MI0017870\_1;accession\_number=MI0017870;Name=hsa-mir-5004  
Total reads = 0



**C) PPB Case 14 tumor miRNA sequencing**  
ID=MI0017870\_1;accession\_number=MI0017870;Name=hsa-mir-5004  
Total reads = 0



**D) PPB Case 14 cell line miRNA sequencing**  
ID=MI0017870\_1;accession\_number=MI0017870;Name=hsa-mir-5004  
Total reads = 0



**B) Normal fibroblast miRNA sequencing**  
ID=MI0016590\_1;accession\_number=MI0016590;Name=hsa-mir-3934  
Total reads = 0



**C) PPB Case 14 tumor miRNA sequencing**  
ID=MI0016590\_1;accession\_number=MI0016590;Name=hsa-mir-3934  
Total reads = 0



**D) PPB Case 14 cell line miRNA sequencing**  
ID=MI0016590\_1;accession\_number=MI0016590;Name=hsa-mir-3934  
Total reads = 0



**B) Normal fibroblast miRNA sequencing**  
ID=MI0006415\_1;accession\_number=MI0006415;Name=hsa-mir-1275  
Total reads = 0



**C) PPB Case 14 tumor miRNA sequencing**  
ID=MI0006415\_1;accession\_number=MI0006415;Name=hsa-mir-1275  
Total reads = 0



**D) PPB Case 14 cell line miRNA sequencing**  
ID=MI0006415\_1;accession\_number=MI0006415;Name=hsa-mir-1275  
Total reads = 1





**B) Normal fibroblast miRNA sequencing**  
ID=MI0019295\_1;accession\_number=MI0019295;Name=hsa-mir-5690  
Total reads = 0



**C) PPB Case 14 tumor miRNA sequencing**  
ID=MI0019295\_1;accession\_number=MI0019295;Name=hsa-mir-5690  
Total reads = 0



**D) PPB Case 14 cell line miRNA sequencing**  
ID=MI0019295\_1;accession\_number=MI0019295;Name=hsa-mir-5690  
Total reads = 0



**B) Normal fibroblast miRNA sequencing**  
ID=MI0016433\_1;accession\_number=MI0016433;Name=hsa-mir-3925  
Total reads = 0



**C) PPB Case 14 tumor miRNA sequencing**  
ID=MI0016433\_1;accession\_number=MI0016433;Name=hsa-mir-3925  
Total reads = 0



**D) PPB Case 14 cell line miRNA sequencing**  
ID=MI0016433\_1;accession\_number=MI0016433;Name=hsa-mir-3925  
Total reads = 0



**B) Normal fibroblast miRNA sequencing**  
ID=MI0016810\_1;accession\_number=MI0016810;Name=hsa-mir-4462  
Total reads = 0



**C) PPB Case 14 tumor miRNA sequencing**  
ID=MI0016810\_1;accession\_number=MI0016810;Name=hsa-mir-4462  
Total reads = 0



**D) PPB Case 14 cell line miRNA sequencing**  
ID=MI0016810\_1;accession\_number=MI0016810;Name=hsa-mir-4462  
Total reads = 0



**B) Normal fibroblast miRNA sequencing**  
ID=MI0017268\_1;accession\_number=MI0017268;Name=hsa-mir-4641  
Total reads = 0



**C) PPB Case 14 tumor miRNA sequencing**  
ID=MI0017268\_1;accession\_number=MI0017268;Name=hsa-mir-4641  
Total reads = 0



**D) PPB Case 14 cell line miRNA sequencing**  
ID=MI0017268\_1;accession\_number=MI0017268;Name=hsa-mir-4641  
Total reads = 0



**B) Normal fibroblast miRNA sequencing**  
ID=MI0017274\_1;accession\_number=MI0017274;Name=hsa-mir-4647  
Total reads = 0



**C) PPB Case 14 tumor miRNA sequencing**  
ID=MI0017274\_1;accession\_number=MI0017274;Name=hsa-mir-4647  
Total reads = 0



**D) PPB Case 14 cell line miRNA sequencing**  
ID=MI0017274\_1;accession\_number=MI0017274;Name=hsa-mir-4647  
Total reads = 0



**B) Normal fibroblast miRNA sequencing**  
ID=MI0017269\_1;accession\_number=MI0017269;Name=hsa-mir-4642  
Total reads = 0



**C) PPB Case 14 tumor miRNA sequencing**  
ID=MI0017269\_1;accession\_number=MI0017269;Name=hsa-mir-4642  
Total reads = 0



**D) PPB Case 14 cell line miRNA sequencing**  
ID=MI0017269\_1;accession\_number=MI0017269;Name=hsa-mir-4642  
Total reads = 0



**B) Normal fibroblast miRNA sequencing**  
ID=MI0003594\_1;accession\_number=MI0003594;Name=hsa-mir-586  
Total reads = 0



**C) PPB Case 14 tumor miRNA sequencing**  
ID=MI0003594\_1;accession\_number=MI0003594;Name=hsa-mir-586  
Total reads = 0



**D) PPB Case 14 cell line miRNA sequencing**  
ID=MI0003594\_1;accession\_number=MI0003594;Name=hsa-mir-586  
Total reads = 0



**B) Normal fibroblast miRNA sequencing**  
ID=MI0000490\_1;accession\_number=MI0000490;Name=hsa-mir-206  
Total reads = 0



**C) PPB Case 14 tumor miRNA sequencing**  
ID=MI0000490\_1;accession\_number=MI0000490;Name=hsa-mir-206  
Total reads = 7

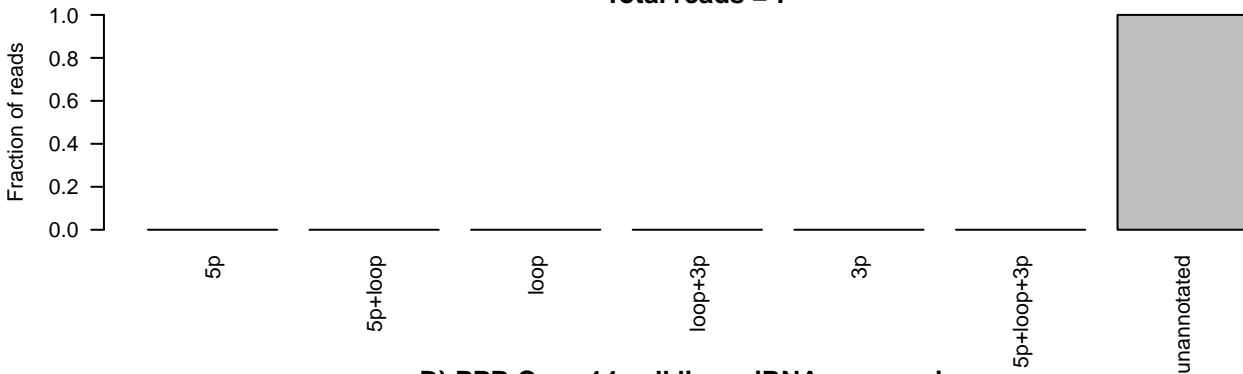

**D) PPB Case 14 cell line miRNA sequencing**  
ID=MI0000490\_1;accession\_number=MI0000490;Name=hsa-mir-206  
Total reads = 0





**B) Normal fibroblast miRNA sequencing**  
ID=MI0000822\_1;accession\_number=MI0000822;Name=hsa-mir-133b  
Total reads = 0



**C) PPB Case 14 tumor miRNA sequencing**  
ID=MI0000822\_1;accession\_number=MI0000822;Name=hsa-mir-133b  
Total reads = 101

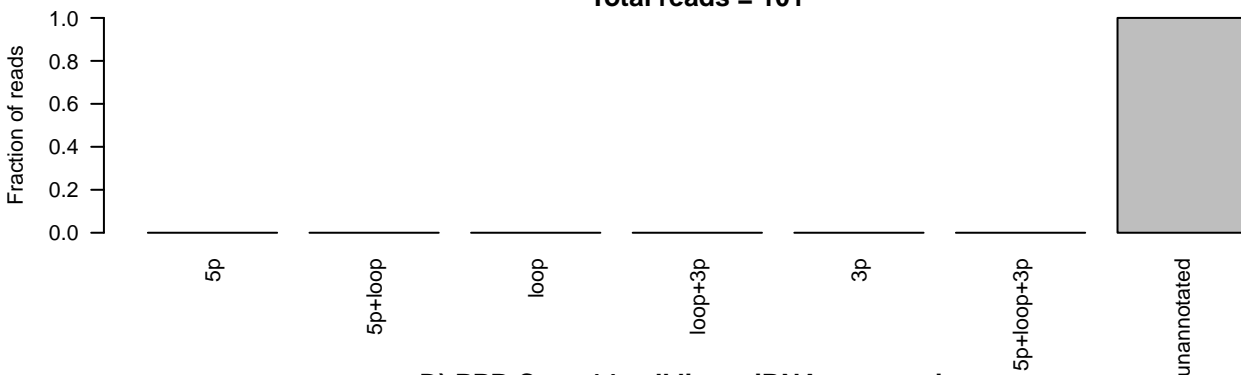

**D) PPB Case 14 cell line miRNA sequencing**  
ID=MI0000822\_1;accession\_number=MI0000822;Name=hsa-mir-133b  
Total reads = 1



**B) Normal fibroblast miRNA sequencing**  
ID=MI0019287\_1;accession\_number=MI0019287;Name=hsa-mir-5685  
Total reads = 0



**C) PPB Case 14 tumor miRNA sequencing**  
ID=MI0019287\_1;accession\_number=MI0019287;Name=hsa-mir-5685  
Total reads = 0



**D) PPB Case 14 cell line miRNA sequencing**  
ID=MI0019287\_1;accession\_number=MI0019287;Name=hsa-mir-5685  
Total reads = 0



**B) Normal fibroblast miRNA sequencing**  
ID=MI0014168\_1;accession\_number=MI0014168;Name=hsa-mir-548u  
Total reads = 0



**C) PPB Case 14 tumor miRNA sequencing**  
ID=MI0014168\_1;accession\_number=MI0014168;Name=hsa-mir-548u  
Total reads = 0



**D) PPB Case 14 cell line miRNA sequencing**  
ID=MI0014168\_1;accession\_number=MI0014168;Name=hsa-mir-548u  
Total reads = 0



**B) Normal fibroblast miRNA sequencing**  
ID=MI0015890\_1;accession\_number=MI0015890;Name=hsa-mir-4282  
Total reads = 0



**C) PPB Case 14 tumor miRNA sequencing**  
ID=MI0015890\_1;accession\_number=MI0015890;Name=hsa-mir-4282  
Total reads = 0



**D) PPB Case 14 cell line miRNA sequencing**  
ID=MI0015890\_1;accession\_number=MI0015890;Name=hsa-mir-4282  
Total reads = 0



**B) Normal fibroblast miRNA sequencing**  
ID=MI0016811\_1;accession\_number=MI0016811;Name=hsa-mir-4463  
Total reads = 0



**C) PPB Case 14 tumor miRNA sequencing**  
ID=MI0016811\_1;accession\_number=MI0016811;Name=hsa-mir-4463  
Total reads = 0



**D) PPB Case 14 cell line miRNA sequencing**  
ID=MI0016811\_1;accession\_number=MI0016811;Name=hsa-mir-4463  
Total reads = 0



**B) Normal fibroblast miRNA sequencing**  
ID=MI0016812\_1;accession\_number=MI0016812;Name=hsa-mir-4464  
Total reads = 0



**C) PPB Case 14 tumor miRNA sequencing**  
ID=MI0016812\_1;accession\_number=MI0016812;Name=hsa-mir-4464  
Total reads = 0



**D) PPB Case 14 cell line miRNA sequencing**  
ID=MI0016812\_1;accession\_number=MI0016812;Name=hsa-mir-4464  
Total reads = 0



**B) Normal fibroblast miRNA sequencing**  
ID=MI0017270\_1;accession\_number=MI0017270;Name=hsa-mir-4643  
Total reads = 0



**C) PPB Case 14 tumor miRNA sequencing**  
ID=MI0017270\_1;accession\_number=MI0017270;Name=hsa-mir-4643  
Total reads = 0



**D) PPB Case 14 cell line miRNA sequencing**  
ID=MI0017270\_1;accession\_number=MI0017270;Name=hsa-mir-4643  
Total reads = 0



**B) Normal fibroblast miRNA sequencing**  
ID=MI0003939\_1;accession\_number=MI0003939;Name=hsa-mir-2113  
Total reads = 0



**C) PPB Case 14 tumor miRNA sequencing**  
ID=MI0003939\_1;accession\_number=MI0003939;Name=hsa-mir-2113  
Total reads = 0



**D) PPB Case 14 cell line miRNA sequencing**  
ID=MI0003939\_1;accession\_number=MI0003939;Name=hsa-mir-2113  
Total reads = 0





**B) Normal fibroblast miRNA sequencing**  
ID=MI0016813\_1;accession\_number=MI0016813;Name=hsa-mir-548ai  
Total reads = 0



**C) PPB Case 14 tumor miRNA sequencing**  
ID=MI0016813\_1;accession\_number=MI0016813;Name=hsa-mir-548ai  
Total reads = 0



**D) PPB Case 14 cell line miRNA sequencing**  
ID=MI0016813\_1;accession\_number=MI0016813;Name=hsa-mir-548ai  
Total reads = 0



**B) Normal fibroblast miRNA sequencing**  
ID=MI0003595\_1;accession\_number=MI0003595;Name=hsa-mir-587  
Total reads = 0



**C) PPB Case 14 tumor miRNA sequencing**  
ID=MI0003595\_1;accession\_number=MI0003595;Name=hsa-mir-587  
Total reads = 0



**D) PPB Case 14 cell line miRNA sequencing**  
ID=MI0003595\_1;accession\_number=MI0003595;Name=hsa-mir-587  
Total reads = 0



**B) Normal fibroblast miRNA sequencing**  
ID=MI0003596\_1;accession\_number=MI0003596;Name=hsa-mir-548b  
Total reads = 0



**C) PPB Case 14 tumor miRNA sequencing**  
ID=MI0003596\_1;accession\_number=MI0003596;Name=hsa-mir-548b  
Total reads = 0



**D) PPB Case 14 cell line miRNA sequencing**  
ID=MI0003596\_1;accession\_number=MI0003596;Name=hsa-mir-548b  
Total reads = 0



**B) Normal fibroblast miRNA sequencing**  
ID=MI0014169\_1;accession\_number=MI0014169;Name=hsa-mir-3144  
Total reads = 0



**C) PPB Case 14 tumor miRNA sequencing**  
ID=MI0014169\_1;accession\_number=MI0014169;Name=hsa-mir-3144  
Total reads = 1



**D) PPB Case 14 cell line miRNA sequencing**  
ID=MI0014169\_1;accession\_number=MI0014169;Name=hsa-mir-3144  
Total reads = 0



**B) Normal fibroblast miRNA sequencing**  
ID=MI0003597\_1;accession\_number=MI0003597;Name=hsa-mir-588  
Total reads = 0



**C) PPB Case 14 tumor miRNA sequencing**  
ID=MI0003597\_1;accession\_number=MI0003597;Name=hsa-mir-588  
Total reads = 0



**D) PPB Case 14 cell line miRNA sequencing**  
ID=MI0003597\_1;accession\_number=MI0003597;Name=hsa-mir-588  
Total reads = 0



**B) Normal fibroblast miRNA sequencing**  
ID=MI0016751\_1;accession\_number=MI0016751;Name=hsa-mir-548h-5  
Total reads = 0



**C) PPB Case 14 tumor miRNA sequencing**  
ID=MI0016751\_1;accession\_number=MI0016751;Name=hsa-mir-548h-5  
Total reads = 0



**D) PPB Case 14 cell line miRNA sequencing**  
ID=MI0016751\_1;accession\_number=MI0016751;Name=hsa-mir-548h-5  
Total reads = 0



**B) Normal fibroblast miRNA sequencing**  
ID=MI0016814\_1;accession\_number=MI0016814;Name=hsa-mir-548aj-1  
Total reads = 0



**C) PPB Case 14 tumor miRNA sequencing**  
ID=MI0016814\_1;accession\_number=MI0016814;Name=hsa-mir-548aj-1  
Total reads = 0



**D) PPB Case 14 cell line miRNA sequencing**  
ID=MI0016814\_1;accession\_number=MI0016814;Name=hsa-mir-548aj-1  
Total reads = 0



**B) Normal fibroblast miRNA sequencing**  
ID=MI0016063\_1;accession\_number=MI0016063;Name=hsa-mir-3662  
Total reads = 0



**C) PPB Case 14 tumor miRNA sequencing**  
ID=MI0016063\_1;accession\_number=MI0016063;Name=hsa-mir-3662  
Total reads = 0



**D) PPB Case 14 cell line miRNA sequencing**  
ID=MI0016063\_1;accession\_number=MI0016063;Name=hsa-mir-3662  
Total reads = 0





**B) Normal fibroblast miRNA sequencing**  
ID=MI0003598\_1;accession\_number=MI0003598;Name=hsa-mir-548a-2  
Total reads = 0



**C) PPB Case 14 tumor miRNA sequencing**  
ID=MI0003598\_1;accession\_number=MI0003598;Name=hsa-mir-548a-2  
Total reads = 0



**D) PPB Case 14 cell line miRNA sequencing**  
ID=MI0003598\_1;accession\_number=MI0003598;Name=hsa-mir-548a-2  
Total reads = 0



**B) Normal fibroblast miRNA sequencing**  
ID=MI0014170\_1;accession\_number=MI0014170;Name=hsa-mir-3145  
Total reads = 0



**C) PPB Case 14 tumor miRNA sequencing**  
ID=MI0014170\_1;accession\_number=MI0014170;Name=hsa-mir-3145  
Total reads = 0



**D) PPB Case 14 cell line miRNA sequencing**  
ID=MI0014170\_1;accession\_number=MI0014170;Name=hsa-mir-3145  
Total reads = 0



**B) Normal fibroblast miRNA sequencing**  
ID=MI0016069\_1;accession\_number=MI0016069;Name=hsa-mir-3668  
Total reads = 0



**C) PPB Case 14 tumor miRNA sequencing**  
ID=MI0016069\_1;accession\_number=MI0016069;Name=hsa-mir-3668  
Total reads = 0



**D) PPB Case 14 cell line miRNA sequencing**  
ID=MI0016069\_1;accession\_number=MI0016069;Name=hsa-mir-3668  
Total reads = 0



**B) Normal fibroblast miRNA sequencing**  
ID=MI0016816\_1;accession\_number=MI0016816;Name=hsa-mir-4465  
Total reads = 0



**C) PPB Case 14 tumor miRNA sequencing**  
ID=MI0016816\_1;accession\_number=MI0016816;Name=hsa-mir-4465  
Total reads = 0



**D) PPB Case 14 cell line miRNA sequencing**  
ID=MI0016816\_1;accession\_number=MI0016816;Name=hsa-mir-4465  
Total reads = 0



**B) Normal fibroblast miRNA sequencing**  
ID=MI0006334\_1;accession\_number=MI0006334;Name=hsa-mir-1202  
Total reads = 0



**C) PPB Case 14 tumor miRNA sequencing**  
ID=MI0006334\_1;accession\_number=MI0006334;Name=hsa-mir-1202  
Total reads = 0



**D) PPB Case 14 cell line miRNA sequencing**  
ID=MI0006334\_1;accession\_number=MI0006334;Name=hsa-mir-1202  
Total reads = 0



**B) Normal fibroblast miRNA sequencing**  
ID=MI0016817\_1;accession\_number=MI0016817;Name=hsa-mir-4466  
Total reads = 0



**C) PPB Case 14 tumor miRNA sequencing**  
ID=MI0016817\_1;accession\_number=MI0016817;Name=hsa-mir-4466  
Total reads = 0



**D) PPB Case 14 cell line miRNA sequencing**  
ID=MI0016817\_1;accession\_number=MI0016817;Name=hsa-mir-4466  
Total reads = 0



**B) Normal fibroblast miRNA sequencing**  
ID=MI0016093\_1;accession\_number=MI0016093;Name=hsa-mir-3692  
Total reads = 0



**C) PPB Case 14 tumor miRNA sequencing**  
ID=MI0016093\_1;accession\_number=MI0016093;Name=hsa-mir-3692  
Total reads = 0



**D) PPB Case 14 cell line miRNA sequencing**  
ID=MI0016093\_1;accession\_number=MI0016093;Name=hsa-mir-3692  
Total reads = 0



**B) Normal fibroblast miRNA sequencing**  
ID=MI0016424\_1;accession\_number=MI0016424;Name=hsa-mir-3918  
Total reads = 0



**C) PPB Case 14 tumor miRNA sequencing**  
ID=MI0016424\_1;accession\_number=MI0016424;Name=hsa-mir-3918  
Total reads = 0



**D) PPB Case 14 cell line miRNA sequencing**  
ID=MI0016424\_1;accession\_number=MI0016424;Name=hsa-mir-3918  
Total reads = 0





**B) Normal fibroblast miRNA sequencing**  
ID=MI0008334\_1;accession\_number=MI0008334;Name=hsa-mir-1913  
Total reads = 0



**C) PPB Case 14 tumor miRNA sequencing**  
ID=MI0008334\_1;accession\_number=MI0008334;Name=hsa-mir-1913  
Total reads = 0



**D) PPB Case 14 cell line miRNA sequencing**  
ID=MI0008334\_1;accession\_number=MI0008334;Name=hsa-mir-1913  
Total reads = 0



**B) Normal fibroblast miRNA sequencing**  
ID=MI0016596\_1;accession\_number=MI0016596;Name=hsa-mir-3939  
Total reads = 0



**C) PPB Case 14 tumor miRNA sequencing**  
ID=MI0016596\_1;accession\_number=MI0016596;Name=hsa-mir-3939  
Total reads = 0



**D) PPB Case 14 cell line miRNA sequencing**  
ID=MI0016596\_1;accession\_number=MI0016596;Name=hsa-mir-3939  
Total reads = 1



**B) Normal fibroblast miRNA sequencing**  
ID=MI0017271\_1;accession\_number=MI0017271;Name=hsa-mir-4644  
Total reads = 0



**C) PPB Case 14 tumor miRNA sequencing**  
ID=MI0017271\_1;accession\_number=MI0017271;Name=hsa-mir-4644  
Total reads = 0



**D) PPB Case 14 cell line miRNA sequencing**  
ID=MI0017271\_1;accession\_number=MI0017271;Name=hsa-mir-4644  
Total reads = 0



**B) Normal fibroblast miRNA sequencing**  
ID=MI0017283\_1;accession\_number=MI0017283;Name=hsa-mir-4655  
Total reads = 0



**C) PPB Case 14 tumor miRNA sequencing**  
ID=MI0017283\_1;accession\_number=MI0017283;Name=hsa-mir-4655  
Total reads = 0



**D) PPB Case 14 cell line miRNA sequencing**  
ID=MI0017283\_1;accession\_number=MI0017283;Name=hsa-mir-4655  
Total reads = 0



**B) Normal fibroblast miRNA sequencing**  
ID=MI0017275\_1;accession\_number=MI0017275;Name=hsa-mir-4648  
Total reads = 0



**C) PPB Case 14 tumor miRNA sequencing**  
ID=MI0017275\_1;accession\_number=MI0017275;Name=hsa-mir-4648  
Total reads = 0



**D) PPB Case 14 cell line miRNA sequencing**  
ID=MI0017275\_1;accession\_number=MI0017275;Name=hsa-mir-4648  
Total reads = 0



**B) Normal fibroblast miRNA sequencing**  
ID=MI0017284\_1;accession\_number=MI0017284;Name=hsa-mir-4656  
Total reads = 0



**C) PPB Case 14 tumor miRNA sequencing**  
ID=MI0017284\_1;accession\_number=MI0017284;Name=hsa-mir-4656  
Total reads = 0



**D) PPB Case 14 cell line miRNA sequencing**  
ID=MI0017284\_1;accession\_number=MI0017284;Name=hsa-mir-4656  
Total reads = 0



**B) Normal fibroblast miRNA sequencing**  
ID=MI0003599\_1;accession\_number=MI0003599;Name=hsa-mir-589  
Total reads = 0



**C) PPB Case 14 tumor miRNA sequencing**  
ID=MI0003599\_1;accession\_number=MI0003599;Name=hsa-mir-589  
Total reads = 0



**D) PPB Case 14 cell line miRNA sequencing**  
ID=MI0003599\_1;accession\_number=MI0003599;Name=hsa-mir-589  
Total reads = 1

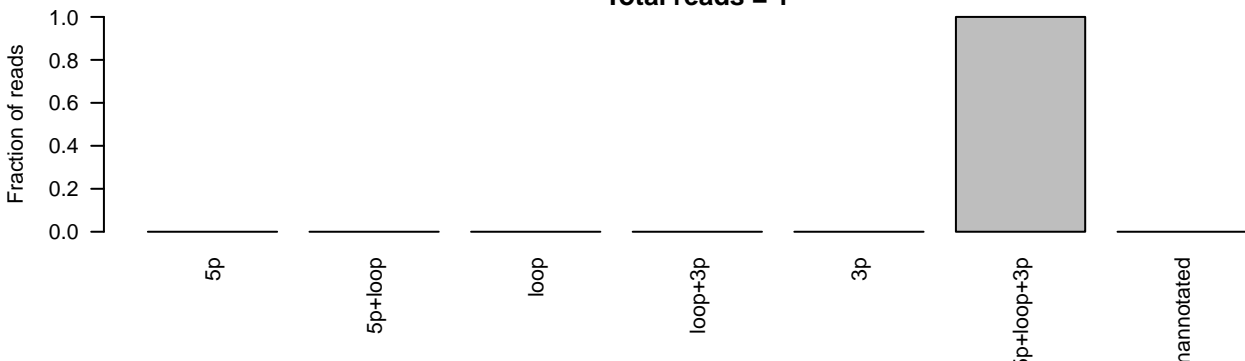

**B) Normal fibroblast miRNA sequencing**  
ID=MI0016084\_1;accession\_number=MI0016084;Name=hsa-mir-3683  
Total reads = 0



**C) PPB Case 14 tumor miRNA sequencing**  
ID=MI0016084\_1;accession\_number=MI0016084;Name=hsa-mir-3683  
Total reads = 0



**D) PPB Case 14 cell line miRNA sequencing**  
ID=MI0016084\_1;accession\_number=MI0016084;Name=hsa-mir-3683  
Total reads = 0





**B) Normal fibroblast miRNA sequencing**  
ID=MI0006367\_1;accession\_number=MI0006367;Name=hsa-mir-1302-6  
Total reads = 0



**C) PPB Case 14 tumor miRNA sequencing**  
ID=MI0006367\_1;accession\_number=MI0006367;Name=hsa-mir-1302-6  
Total reads = 0



**D) PPB Case 14 cell line miRNA sequencing**  
ID=MI0006367\_1;accession\_number=MI0006367;Name=hsa-mir-1302-6  
Total reads = 0



**B) Normal fibroblast miRNA sequencing**  
ID=MI0014172\_1;accession\_number=MI0014172;Name=hsa-mir-3146  
Total reads = 0



**C) PPB Case 14 tumor miRNA sequencing**  
ID=MI0014172\_1;accession\_number=MI0014172;Name=hsa-mir-3146  
Total reads = 0

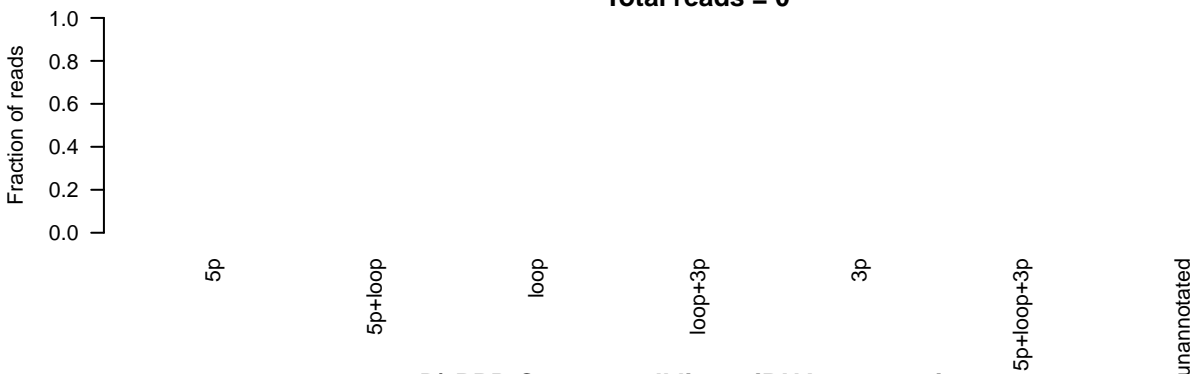

**D) PPB Case 14 cell line miRNA sequencing**  
ID=MI0014172\_1;accession\_number=MI0014172;Name=hsa-mir-3146  
Total reads = 0

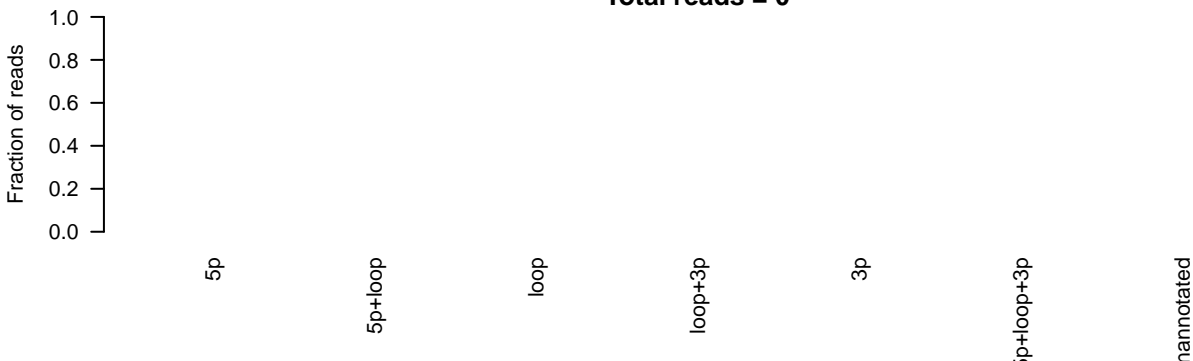

**B) Normal fibroblast miRNA sequencing**  
ID=MI0006276\_1;accession\_number=MI0006276;Name=hsa-mir-1183  
Total reads = 0



**C) PPB Case 14 tumor miRNA sequencing**  
ID=MI0006276\_1;accession\_number=MI0006276;Name=hsa-mir-1183  
Total reads = 0



**D) PPB Case 14 cell line miRNA sequencing**  
ID=MI0006276\_1;accession\_number=MI0006276;Name=hsa-mir-1183  
Total reads = 0



**B) Normal fibroblast miRNA sequencing**  
ID=MI0001150\_1;accession\_number=MI0001150;Name=hsa-mir-196b  
Total reads = 0



**C) PPB Case 14 tumor miRNA sequencing**  
ID=MI0001150\_1;accession\_number=MI0001150;Name=hsa-mir-196b  
Total reads = 8

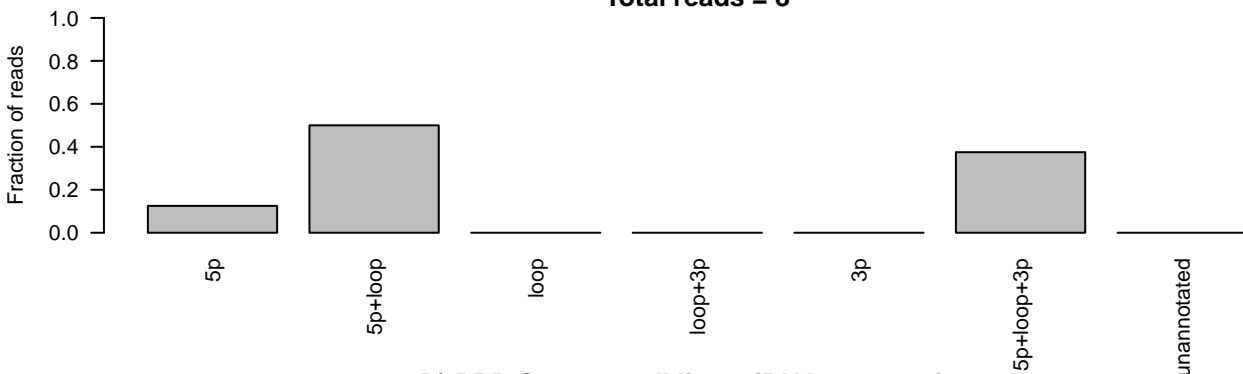

**D) PPB Case 14 cell line miRNA sequencing**  
ID=MI0001150\_1;accession\_number=MI0001150;Name=hsa-mir-196b  
Total reads = 2



**B) Normal fibroblast miRNA sequencing**  
ID=MI0003762\_1;accession\_number=MI0003762;Name=hsa-mir-550a-3  
Total reads = 0



**C) PPB Case 14 tumor miRNA sequencing**  
ID=MI0003762\_1;accession\_number=MI0003762;Name=hsa-mir-550a-3  
Total reads = 0



**D) PPB Case 14 cell line miRNA sequencing**  
ID=MI0003762\_1;accession\_number=MI0003762;Name=hsa-mir-550a-3  
Total reads = 0



**B) Normal fibroblast miRNA sequencing**  
ID=MI0003601\_1;accession\_number=MI0003601;Name=hsa-mir-550a-2  
Total reads = 0



**C) PPB Case 14 tumor miRNA sequencing**  
ID=MI0003601\_1;accession\_number=MI0003601;Name=hsa-mir-550a-2  
Total reads = 4



**D) PPB Case 14 cell line miRNA sequencing**  
ID=MI0003601\_1;accession\_number=MI0003601;Name=hsa-mir-550a-2  
Total reads = 1



**B) Normal fibroblast miRNA sequencing**  
ID=MI0016687\_1;accession\_number=MI0016687;Name=hsa-mir-550b-2  
Total reads = 0



**C) PPB Case 14 tumor miRNA sequencing**  
ID=MI0016687\_1;accession\_number=MI0016687;Name=hsa-mir-550b-2  
Total reads = 4

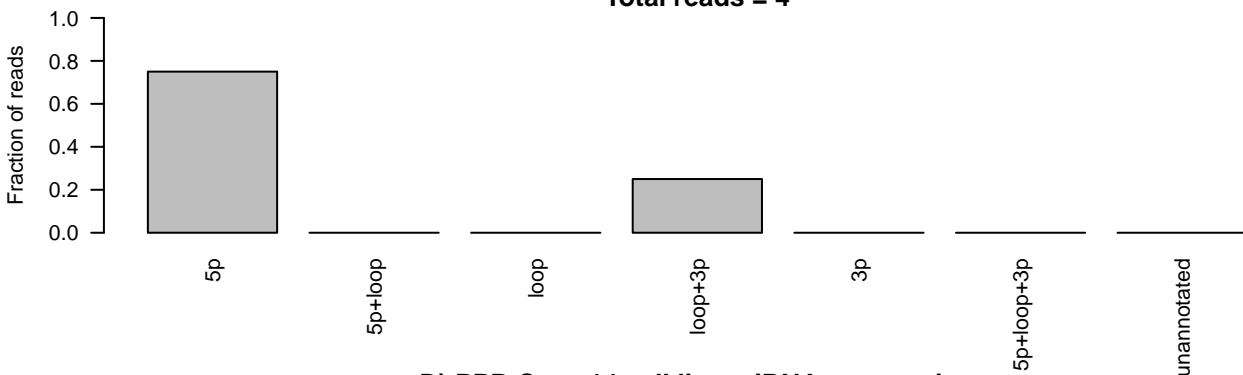

**D) PPB Case 14 cell line miRNA sequencing**  
ID=MI0016687\_1;accession\_number=MI0016687;Name=hsa-mir-550b-2  
Total reads = 1



**B) Normal fibroblast miRNA sequencing**  
ID=MI0006399\_1;accession\_number=MI0006399;Name=hsa-mir-548n  
Total reads = 0



**C) PPB Case 14 tumor miRNA sequencing**  
ID=MI0006399\_1;accession\_number=MI0006399;Name=hsa-mir-548n  
Total reads = 0



**D) PPB Case 14 cell line miRNA sequencing**  
ID=MI0006399\_1;accession\_number=MI0006399;Name=hsa-mir-548n  
Total reads = 0





**B) Normal fibroblast miRNA sequencing**  
ID=MI0006332\_1;accession\_number=MI0006332;Name=hsa-mir-1200  
Total reads = 0



**C) PPB Case 14 tumor miRNA sequencing**  
ID=MI0006332\_1;accession\_number=MI0006332;Name=hsa-mir-1200  
Total reads = 0



**D) PPB Case 14 cell line miRNA sequencing**  
ID=MI0006332\_1;accession\_number=MI0006332;Name=hsa-mir-1200  
Total reads = 0



**B) Normal fibroblast miRNA sequencing**  
ID=MI0016600\_1;accession\_number=MI0016600;Name=hsa-mir-3943  
Total reads = 0



**C) PPB Case 14 tumor miRNA sequencing**  
ID=MI0016600\_1;accession\_number=MI0016600;Name=hsa-mir-3943  
Total reads = 0



**D) PPB Case 14 cell line miRNA sequencing**  
ID=MI0016600\_1;accession\_number=MI0016600;Name=hsa-mir-3943  
Total reads = 0



**B) Normal fibroblast miRNA sequencing**  
ID=MI0017276\_1;accession\_number=MI0017276;Name=hsa-mir-4649  
Total reads = 0



**C) PPB Case 14 tumor miRNA sequencing**  
ID=MI0017276\_1;accession\_number=MI0017276;Name=hsa-mir-4649  
Total reads = 0



**D) PPB Case 14 cell line miRNA sequencing**  
ID=MI0017276\_1;accession\_number=MI0017276;Name=hsa-mir-4649  
Total reads = 0



**B) Normal fibroblast miRNA sequencing**  
ID=MI0017285\_1;accession\_number=MI0017285;Name=hsa-mir-4657  
Total reads = 0



**C) PPB Case 14 tumor miRNA sequencing**  
ID=MI0017285\_1;accession\_number=MI0017285;Name=hsa-mir-4657  
Total reads = 0



**D) PPB Case 14 cell line miRNA sequencing**  
ID=MI0017285\_1;accession\_number=MI0017285;Name=hsa-mir-4657  
Total reads = 0



**B) Normal fibroblast miRNA sequencing**  
ID=MI0015892\_1;accession\_number=MI0015892;Name=hsa-mir-4283-1  
Total reads = 0



**C) PPB Case 14 tumor miRNA sequencing**  
ID=MI0015892\_1;accession\_number=MI0015892;Name=hsa-mir-4283-1  
Total reads = 0



**D) PPB Case 14 cell line miRNA sequencing**  
ID=MI0015892\_1;accession\_number=MI0015892;Name=hsa-mir-4283-1  
Total reads = 0



**B) Normal fibroblast miRNA sequencing**  
ID=MI0014173\_1;accession\_number=MI0014173;Name=hsa-mir-3147  
Total reads = 0



**C) PPB Case 14 tumor miRNA sequencing**  
ID=MI0014173\_1;accession\_number=MI0014173;Name=hsa-mir-3147  
Total reads = 0



**D) PPB Case 14 cell line miRNA sequencing**  
ID=MI0014173\_1;accession\_number=MI0014173;Name=hsa-mir-3147  
Total reads = 0



**B) Normal fibroblast miRNA sequencing**  
ID=MI0015982\_1;accession\_number=MI0015982;Name=hsa-mir-4283-2  
Total reads = 0



**C) PPB Case 14 tumor miRNA sequencing**  
ID=MI0015982\_1;accession\_number=MI0015982;Name=hsa-mir-4283-2  
Total reads = 0



**D) PPB Case 14 cell line miRNA sequencing**  
ID=MI0015982\_1;accession\_number=MI0015982;Name=hsa-mir-4283-2  
Total reads = 0



**B) Normal fibroblast miRNA sequencing**  
ID=MI0017277\_1;accession\_number=MI0017277;Name=hsa-mir-4650-1  
Total reads = 0



**C) PPB Case 14 tumor miRNA sequencing**  
ID=MI0017277\_1;accession\_number=MI0017277;Name=hsa-mir-4650-1  
Total reads = 0



**D) PPB Case 14 cell line miRNA sequencing**  
ID=MI0017277\_1;accession\_number=MI0017277;Name=hsa-mir-4650-1  
Total reads = 0





**B) Normal fibroblast miRNA sequencing**  
ID=MI0016419\_1;accession\_number=MI0016419;Name=hsa-mir-3914-1  
Total reads = 0



**C) PPB Case 14 tumor miRNA sequencing**  
ID=MI0016419\_1;accession\_number=MI0016419;Name=hsa-mir-3914-1  
Total reads = 0



**D) PPB Case 14 cell line miRNA sequencing**  
ID=MI0016419\_1;accession\_number=MI0016419;Name=hsa-mir-3914-1  
Total reads = 0



**B) Normal fibroblast miRNA sequencing**  
ID=MI0016421\_1;accession\_number=MI0016421;Name=hsa-mir-3914-2  
Total reads = 0



**C) PPB Case 14 tumor miRNA sequencing**  
ID=MI0016421\_1;accession\_number=MI0016421;Name=hsa-mir-3914-2  
Total reads = 0



**D) PPB Case 14 cell line miRNA sequencing**  
ID=MI0016421\_1;accession\_number=MI0016421;Name=hsa-mir-3914-2  
Total reads = 0



**B) Normal fibroblast miRNA sequencing**  
ID=MI0017278\_1;accession\_number=MI0017278;Name=hsa-mir-4650-2  
Total reads = 0



**C) PPB Case 14 tumor miRNA sequencing**  
ID=MI0017278\_1;accession\_number=MI0017278;Name=hsa-mir-4650-2  
Total reads = 0



**D) PPB Case 14 cell line miRNA sequencing**  
ID=MI0017278\_1;accession\_number=MI0017278;Name=hsa-mir-4650-2  
Total reads = 0



**B) Normal fibroblast miRNA sequencing**  
ID=MI0015893\_1;accession\_number=MI0015893;Name=hsa-mir-4284  
Total reads = 0



**C) PPB Case 14 tumor miRNA sequencing**  
ID=MI0015893\_1;accession\_number=MI0015893;Name=hsa-mir-4284  
Total reads = 0



**D) PPB Case 14 cell line miRNA sequencing**  
ID=MI0015893\_1;accession\_number=MI0015893;Name=hsa-mir-4284  
Total reads = 0



**B) Normal fibroblast miRNA sequencing**  
ID=MI0017279\_1;accession\_number=MI0017279;Name=hsa-mir-4651  
Total reads = 0



**C) PPB Case 14 tumor miRNA sequencing**  
ID=MI0017279\_1;accession\_number=MI0017279;Name=hsa-mir-4651  
Total reads = 0



**D) PPB Case 14 cell line miRNA sequencing**  
ID=MI0017279\_1;accession\_number=MI0017279;Name=hsa-mir-4651  
Total reads = 0



**B) Normal fibroblast miRNA sequencing**  
ID=MI0006346\_1;accession\_number=MI0006346;Name=hsa-mir-1285-1  
Total reads = 0



**C) PPB Case 14 tumor miRNA sequencing**  
ID=MI0006346\_1;accession\_number=MI0006346;Name=hsa-mir-1285-1  
Total reads = 0



**D) PPB Case 14 cell line miRNA sequencing**  
ID=MI0006346\_1;accession\_number=MI0006346;Name=hsa-mir-1285-1  
Total reads = 0



**B) Normal fibroblast miRNA sequencing**  
ID=MI0003124\_1;accession\_number=MI0003124;Name=hsa-mir-489  
Total reads = 0



**C) PPB Case 14 tumor miRNA sequencing**  
ID=MI0003124\_1;accession\_number=MI0003124;Name=hsa-mir-489  
Total reads = 0



**D) PPB Case 14 cell line miRNA sequencing**  
ID=MI0003124\_1;accession\_number=MI0003124;Name=hsa-mir-489  
Total reads = 0



**B) Normal fibroblast miRNA sequencing**  
ID=MI0017280\_1;accession\_number=MI0017280;Name=hsa-mir-4652  
Total reads = 0



**C) PPB Case 14 tumor miRNA sequencing**  
ID=MI0017280\_1;accession\_number=MI0017280;Name=hsa-mir-4652  
Total reads = 0



**D) PPB Case 14 cell line miRNA sequencing**  
ID=MI0017280\_1;accession\_number=MI0017280;Name=hsa-mir-4652  
Total reads = 0





**B) Normal fibroblast miRNA sequencing**  
ID=MI0003603\_1;accession\_number=MI0003603;Name=hsa-mir-591  
Total reads = 0



**C) PPB Case 14 tumor miRNA sequencing**  
ID=MI0003603\_1;accession\_number=MI0003603;Name=hsa-mir-591  
Total reads = 0



**D) PPB Case 14 cell line miRNA sequencing**  
ID=MI0003603\_1;accession\_number=MI0003603;Name=hsa-mir-591  
Total reads = 0



**B) Normal fibroblast miRNA sequencing**  
ID=MI0019297\_1;accession\_number=MI0019297;Name=hsa-mir-5692a-1  
Total reads = 0



**C) PPB Case 14 tumor miRNA sequencing**  
ID=MI0019297\_1;accession\_number=MI0019297;Name=hsa-mir-5692a-1  
Total reads = 0



**D) PPB Case 14 cell line miRNA sequencing**  
ID=MI0019297\_1;accession\_number=MI0019297;Name=hsa-mir-5692a-1  
Total reads = 0



**B) Normal fibroblast miRNA sequencing**  
ID=MI0019289\_1;accession\_number=MI0019289;Name=hsa-mir-5692c-2  
Total reads = 0



**C) PPB Case 14 tumor miRNA sequencing**  
ID=MI0019289\_1;accession\_number=MI0019289;Name=hsa-mir-5692c-2  
Total reads = 0



**D) PPB Case 14 cell line miRNA sequencing**  
ID=MI0019289\_1;accession\_number=MI0019289;Name=hsa-mir-5692c-2  
Total reads = 0



**B) Normal fibroblast miRNA sequencing**  
ID=MI0015999\_1;accession\_number=MI0015999;Name=hsa-mir-3609  
Total reads = 0



**C) PPB Case 14 tumor miRNA sequencing**  
ID=MI0015999\_1;accession\_number=MI0015999;Name=hsa-mir-3609  
Total reads = 0



**D) PPB Case 14 cell line miRNA sequencing**  
ID=MI0015999\_1;accession\_number=MI0015999;Name=hsa-mir-3609  
Total reads = 0



**B) Normal fibroblast miRNA sequencing**  
ID=MI0017286\_1;accession\_number=MI0017286;Name=hsa-mir-4658  
Total reads = 0



**C) PPB Case 14 tumor miRNA sequencing**  
ID=MI0017286\_1;accession\_number=MI0017286;Name=hsa-mir-4658  
Total reads = 0



**D) PPB Case 14 cell line miRNA sequencing**  
ID=MI0017286\_1;accession\_number=MI0017286;Name=hsa-mir-4658  
Total reads = 0



**B) Normal fibroblast miRNA sequencing**  
ID=MI0017281\_1;accession\_number=MI0017281;Name=hsa-mir-4653  
Total reads = 0



**C) PPB Case 14 tumor miRNA sequencing**  
ID=MI0017281\_1;accession\_number=MI0017281;Name=hsa-mir-4653  
Total reads = 0



**D) PPB Case 14 cell line miRNA sequencing**  
ID=MI0017281\_1;accession\_number=MI0017281;Name=hsa-mir-4653  
Total reads = 0



**B) Normal fibroblast miRNA sequencing**  
ID=MI0015891\_1;accession\_number=MI0015891;Name=hsa-mir-4285  
Total reads = 0



**C) PPB Case 14 tumor miRNA sequencing**  
ID=MI0015891\_1;accession\_number=MI0015891;Name=hsa-mir-4285  
Total reads = 0



**D) PPB Case 14 cell line miRNA sequencing**  
ID=MI0015891\_1;accession\_number=MI0015891;Name=hsa-mir-4285  
Total reads = 0



**B) Normal fibroblast miRNA sequencing**  
ID=MI0006402\_1;accession\_number=MI0006402;Name=hsa-mir-548o  
Total reads = 0



**C) PPB Case 14 tumor miRNA sequencing**  
ID=MI0006402\_1;accession\_number=MI0006402;Name=hsa-mir-548o  
Total reads = 0



**D) PPB Case 14 cell line miRNA sequencing**  
ID=MI0006402\_1;accession\_number=MI0006402;Name=hsa-mir-548o  
Total reads = 0





**B) Normal fibroblast miRNA sequencing**  
ID=MI0017979\_1;accession\_number=MI0017979;Name=hsa-mir-5090  
Total reads = 0



**C) PPB Case 14 tumor miRNA sequencing**  
ID=MI0017979\_1;accession\_number=MI0017979;Name=hsa-mir-5090  
Total reads = 0



**D) PPB Case 14 cell line miRNA sequencing**  
ID=MI0017979\_1;accession\_number=MI0017979;Name=hsa-mir-5090  
Total reads = 0



**B) Normal fibroblast miRNA sequencing**  
ID=MI0016818\_1;accession\_number=MI0016818;Name=hsa-mir-4467  
Total reads = 0



**C) PPB Case 14 tumor miRNA sequencing**  
ID=MI0016818\_1;accession\_number=MI0016818;Name=hsa-mir-4467  
Total reads = 0



**D) PPB Case 14 cell line miRNA sequencing**  
ID=MI0016818\_1;accession\_number=MI0016818;Name=hsa-mir-4467  
Total reads = 0



**B) Normal fibroblast miRNA sequencing**  
ID=MI0016067\_1;accession\_number=MI0016067;Name=hsa-mir-3666  
Total reads = 0



**C) PPB Case 14 tumor miRNA sequencing**  
ID=MI0016067\_1;accession\_number=MI0016067;Name=hsa-mir-3666  
Total reads = 0



**D) PPB Case 14 cell line miRNA sequencing**  
ID=MI0016067\_1;accession\_number=MI0016067;Name=hsa-mir-3666  
Total reads = 0



**B) Normal fibroblast miRNA sequencing**  
ID=MI0021277\_1;accession\_number=MI0021277;Name=hsa-mir-6132  
Total reads = 0



**C) PPB Case 14 tumor miRNA sequencing**  
ID=MI0021277\_1;accession\_number=MI0021277;Name=hsa-mir-6132  
Total reads = 0



**D) PPB Case 14 cell line miRNA sequencing**  
ID=MI0021277\_1;accession\_number=MI0021277;Name=hsa-mir-6132  
Total reads = 0



**B) Normal fibroblast miRNA sequencing**  
ID=MI0003604\_1;accession\_number=MI0003604;Name=hsa-mir-592  
Total reads = 0



**C) PPB Case 14 tumor miRNA sequencing**  
ID=MI0003604\_1;accession\_number=MI0003604;Name=hsa-mir-592  
Total reads = 0



**D) PPB Case 14 cell line miRNA sequencing**  
ID=MI0003604\_1;accession\_number=MI0003604;Name=hsa-mir-592  
Total reads = 0



**B) Normal fibroblast miRNA sequencing**  
ID=MI0003605\_1;accession\_number=MI0003605;Name=hsa-mir-593  
Total reads = 0



**C) PPB Case 14 tumor miRNA sequencing**  
ID=MI0003605\_1;accession\_number=MI0003605;Name=hsa-mir-593  
Total reads = 0



**D) PPB Case 14 cell line miRNA sequencing**  
ID=MI0003605\_1;accession\_number=MI0003605;Name=hsa-mir-593  
Total reads = 0



**B) Normal fibroblast miRNA sequencing**  
ID=MI0000252\_1;accession\_number=MI0000252;Name=hsa-mir-129-1  
Total reads = 0



**C) PPB Case 14 tumor miRNA sequencing**  
ID=MI0000252\_1;accession\_number=MI0000252;Name=hsa-mir-129-1  
Total reads = 0



**D) PPB Case 14 cell line miRNA sequencing**  
ID=MI0000252\_1;accession\_number=MI0000252;Name=hsa-mir-129-1  
Total reads = 0



**B) Normal fibroblast miRNA sequencing**  
ID=MI0000272\_1;accession\_number=MI0000272;Name=hsa-mir-182  
Total reads = 0



**C) PPB Case 14 tumor miRNA sequencing**  
ID=MI0000272\_1;accession\_number=MI0000272;Name=hsa-mir-182  
Total reads = 51

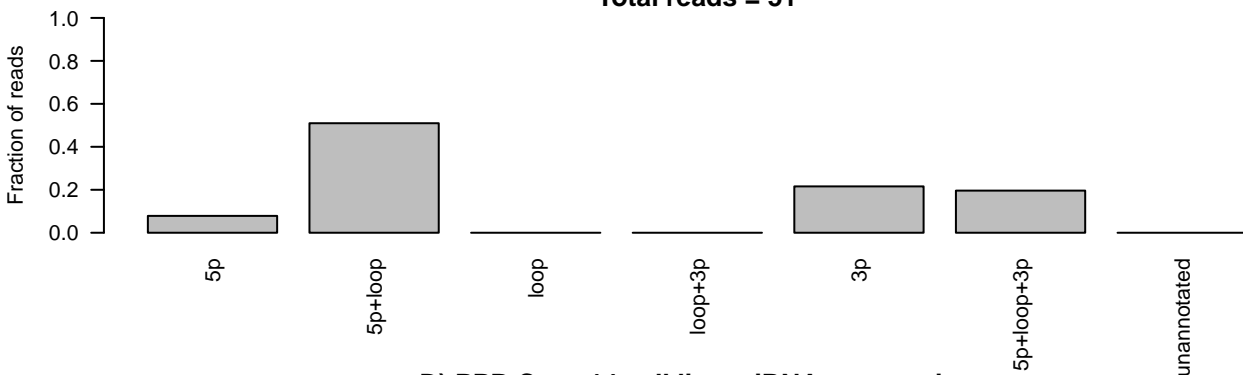

**D) PPB Case 14 cell line miRNA sequencing**  
ID=MI0000272\_1;accession\_number=MI0000272;Name=hsa-mir-182  
Total reads = 6

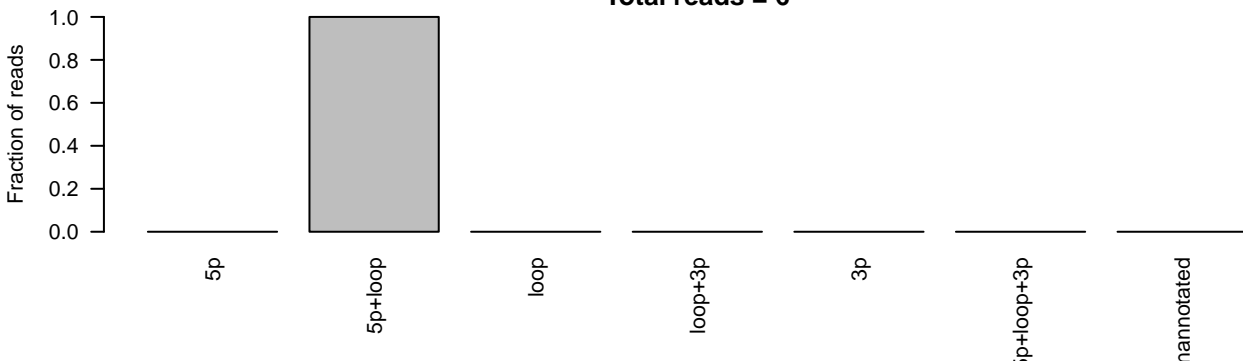



**B) Normal fibroblast miRNA sequencing**  
ID=MI0000098\_1;accession\_number=MI0000098;Name=hsa-mir-96  
Total reads = 0



**C) PPB Case 14 tumor miRNA sequencing**  
ID=MI0000098\_1;accession\_number=MI0000098;Name=hsa-mir-96  
Total reads = 6

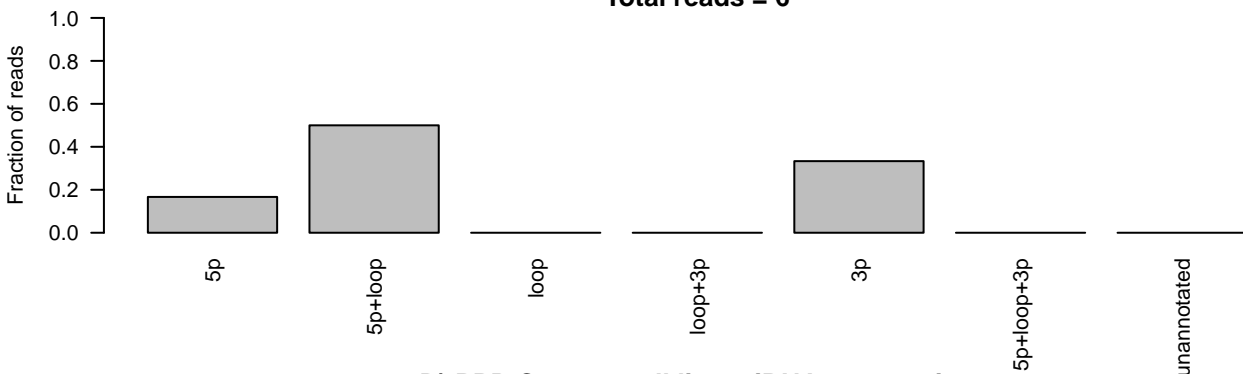

**D) PPB Case 14 cell line miRNA sequencing**  
ID=MI0000098\_1;accession\_number=MI0000098;Name=hsa-mir-96  
Total reads = 0



**B) Normal fibroblast miRNA sequencing**  
ID=MI0000273\_1;accession\_number=MI0000273;Name=hsa-mir-183  
Total reads = 0



**C) PPB Case 14 tumor miRNA sequencing**  
ID=MI0000273\_1;accession\_number=MI0000273;Name=hsa-mir-183  
Total reads = 68

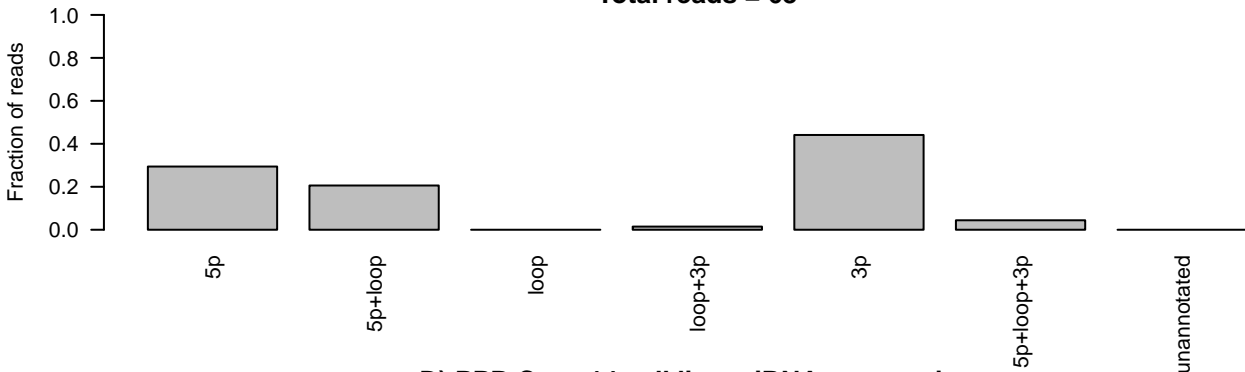

**D) PPB Case 14 cell line miRNA sequencing**  
ID=MI0000273\_1;accession\_number=MI0000273;Name=hsa-mir-183  
Total reads = 7

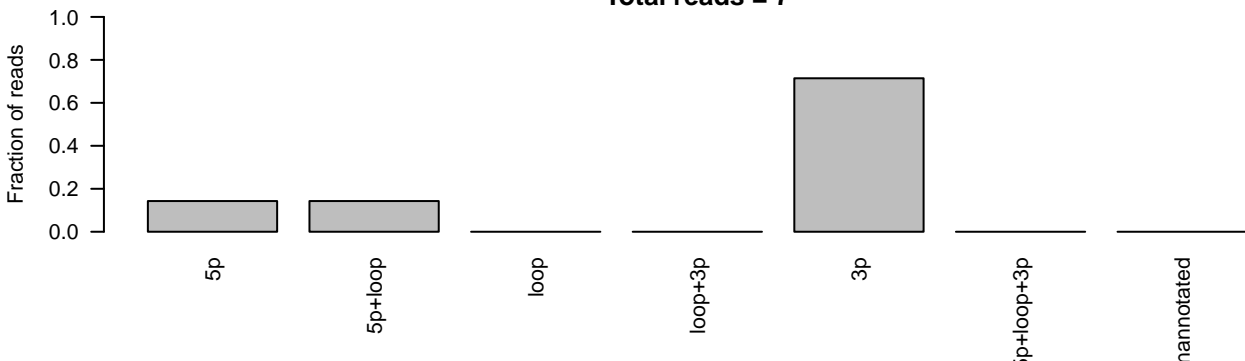

**B) Normal fibroblast miRNA sequencing**  
ID=MI0016054\_1;accession\_number=MI0016054;Name=hsa-mir-3654  
Total reads = 0



**C) PPB Case 14 tumor miRNA sequencing**  
ID=MI0016054\_1;accession\_number=MI0016054;Name=hsa-mir-3654  
Total reads = 0



**D) PPB Case 14 cell line miRNA sequencing**  
ID=MI0016054\_1;accession\_number=MI0016054;Name=hsa-mir-3654  
Total reads = 0



**B) Normal fibroblast miRNA sequencing**  
ID=MI0021278\_1;accession\_number=MI0021278;Name=hsa-mir-6133  
Total reads = 0



**C) PPB Case 14 tumor miRNA sequencing**  
ID=MI0021278\_1;accession\_number=MI0021278;Name=hsa-mir-6133  
Total reads = 0



**D) PPB Case 14 cell line miRNA sequencing**  
ID=MI0021278\_1;accession\_number=MI0021278;Name=hsa-mir-6133  
Total reads = 0



**B) Normal fibroblast miRNA sequencing**  
ID=MI0022221\_1;accession\_number=MI0022221;Name=hsa-mir-6509  
Total reads = 0



**C) PPB Case 14 tumor miRNA sequencing**  
ID=MI0022221\_1;accession\_number=MI0022221;Name=hsa-mir-6509  
Total reads = 0



**D) PPB Case 14 cell line miRNA sequencing**  
ID=MI0022221\_1;accession\_number=MI0022221;Name=hsa-mir-6509  
Total reads = 0



**B) Normal fibroblast miRNA sequencing**  
ID=MI0016819\_1;accession\_number=MI0016819;Name=hsa-mir-4468  
Total reads = 0



**C) PPB Case 14 tumor miRNA sequencing**  
ID=MI0016819\_1;accession\_number=MI0016819;Name=hsa-mir-4468  
Total reads = 0



**D) PPB Case 14 cell line miRNA sequencing**  
ID=MI0016819\_1;accession\_number=MI0016819;Name=hsa-mir-4468  
Total reads = 0



**B) Normal fibroblast miRNA sequencing**  
ID=MI0006377\_1;accession\_number=MI0006377;Name=hsa-mir-548f-4  
Total reads = 0



**C) PPB Case 14 tumor miRNA sequencing**  
ID=MI0006377\_1;accession\_number=MI0006377;Name=hsa-mir-548f-4  
Total reads = 0



**D) PPB Case 14 cell line miRNA sequencing**  
ID=MI0006377\_1;accession\_number=MI0006377;Name=hsa-mir-548f-4  
Total reads = 0



**B) Normal fibroblast miRNA sequencing**  
ID=MI0016410\_1;accession\_number=MI0016410;Name=hsa-mir-3907  
Total reads = 0



**C) PPB Case 14 tumor miRNA sequencing**  
ID=MI0016410\_1;accession\_number=MI0016410;Name=hsa-mir-3907  
Total reads = 0



**D) PPB Case 14 cell line miRNA sequencing**  
ID=MI0016410\_1;accession\_number=MI0016410;Name=hsa-mir-3907  
Total reads = 0





**B) Normal fibroblast miRNA sequencing**  
ID=MI0003607\_1;accession\_number=MI0003607;Name=hsa-mir-595  
Total reads = 0



**C) PPB Case 14 tumor miRNA sequencing**  
ID=MI0003607\_1;accession\_number=MI0003607;Name=hsa-mir-595  
Total reads = 0



**D) PPB Case 14 cell line miRNA sequencing**  
ID=MI0003607\_1;accession\_number=MI0003607;Name=hsa-mir-595  
Total reads = 0



**B) Normal fibroblast miRNA sequencing**  
ID=MI0019315\_1;accession\_number=MI0019315;Name=hsa-mir-5707  
Total reads = 0



**C) PPB Case 14 tumor miRNA sequencing**  
ID=MI0019315\_1;accession\_number=MI0019315;Name=hsa-mir-5707  
Total reads = 0



**D) PPB Case 14 cell line miRNA sequencing**  
ID=MI0019315\_1;accession\_number=MI0019315;Name=hsa-mir-5707  
Total reads = 0



**B) Normal fibroblast miRNA sequencing**  
ID=MI0016075\_1;accession\_number=MI0016075;Name=hsa-mir-3674  
Total reads = 0



**C) PPB Case 14 tumor miRNA sequencing**  
ID=MI0016075\_1;accession\_number=MI0016075;Name=hsa-mir-3674  
Total reads = 0



**D) PPB Case 14 cell line miRNA sequencing**  
ID=MI0016075\_1;accession\_number=MI0016075;Name=hsa-mir-3674  
Total reads = 0



**B) Normal fibroblast miRNA sequencing**  
ID=MI0003608\_1;accession\_number=MI0003608;Name=hsa-mir-596  
Total reads = 0



**C) PPB Case 14 tumor miRNA sequencing**  
ID=MI0003608\_1;accession\_number=MI0003608;Name=hsa-mir-596  
Total reads = 0



**D) PPB Case 14 cell line miRNA sequencing**  
ID=MI0003608\_1;accession\_number=MI0003608;Name=hsa-mir-596  
Total reads = 0



**B) Normal fibroblast miRNA sequencing**  
ID=MI0017287\_1;accession\_number=MI0017287;Name=hsa-mir-4659a  
Total reads = 0



**C) PPB Case 14 tumor miRNA sequencing**  
ID=MI0017287\_1;accession\_number=MI0017287;Name=hsa-mir-4659a  
Total reads = 0



**D) PPB Case 14 cell line miRNA sequencing**  
ID=MI0017287\_1;accession\_number=MI0017287;Name=hsa-mir-4659a  
Total reads = 0



**B) Normal fibroblast miRNA sequencing**  
ID=MI0017291\_1;accession\_number=MI0017291;Name=hsa-mir-4659b  
Total reads = 0



**C) PPB Case 14 tumor miRNA sequencing**  
ID=MI0017291\_1;accession\_number=MI0017291;Name=hsa-mir-4659b  
Total reads = 0



**D) PPB Case 14 cell line miRNA sequencing**  
ID=MI0017291\_1;accession\_number=MI0017291;Name=hsa-mir-4659b  
Total reads = 0



**B) Normal fibroblast miRNA sequencing**  
ID=MI0006423\_1;accession\_number=MI0006423;Name=hsa-mir-548i-3  
Total reads = 0



**C) PPB Case 14 tumor miRNA sequencing**  
ID=MI0006423\_1;accession\_number=MI0006423;Name=hsa-mir-548i-3  
Total reads = 0



**D) PPB Case 14 cell line miRNA sequencing**  
ID=MI0006423\_1;accession\_number=MI0006423;Name=hsa-mir-548i-3  
Total reads = 0



**B) Normal fibroblast miRNA sequencing**  
ID=MI0017288\_1;accession\_number=MI0017288;Name=hsa-mir-4660  
Total reads = 0



**C) PPB Case 14 tumor miRNA sequencing**  
ID=MI0017288\_1;accession\_number=MI0017288;Name=hsa-mir-4660  
Total reads = 0



**D) PPB Case 14 cell line miRNA sequencing**  
ID=MI0017288\_1;accession\_number=MI0017288;Name=hsa-mir-4660  
Total reads = 0





**B) Normal fibroblast miRNA sequencing**  
ID=MI0003609\_1;accession\_number=MI0003609;Name=hsa-mir-597  
Total reads = 0



**C) PPB Case 14 tumor miRNA sequencing**  
ID=MI0003609\_1;accession\_number=MI0003609;Name=hsa-mir-597  
Total reads = 0



**D) PPB Case 14 cell line miRNA sequencing**  
ID=MI0003609\_1;accession\_number=MI0003609;Name=hsa-mir-597  
Total reads = 0



**B) Normal fibroblast miRNA sequencing**  
ID=MI0000443\_1;accession\_number=MI0000443;Name=hsa-mir-124-1  
Total reads = 0



**C) PPB Case 14 tumor miRNA sequencing**  
ID=MI0000443\_1;accession\_number=MI0000443;Name=hsa-mir-124-1  
Total reads = 0



**D) PPB Case 14 cell line miRNA sequencing**  
ID=MI0000443\_1;accession\_number=MI0000443;Name=hsa-mir-124-1  
Total reads = 0



**B) Normal fibroblast miRNA sequencing**  
ID=MI0015894\_1;accession\_number=MI0015894;Name=hsa-mir-4286  
Total reads = 0



**C) PPB Case 14 tumor miRNA sequencing**  
ID=MI0015894\_1;accession\_number=MI0015894;Name=hsa-mir-4286  
Total reads = 0



**D) PPB Case 14 cell line miRNA sequencing**  
ID=MI0015894\_1;accession\_number=MI0015894;Name=hsa-mir-4286  
Total reads = 0



**B) Normal fibroblast miRNA sequencing**  
ID=MI0006653\_1;accession\_number=MI0006653;Name=hsa-mir-1322  
Total reads = 0



**C) PPB Case 14 tumor miRNA sequencing**  
ID=MI0006653\_1;accession\_number=MI0006653;Name=hsa-mir-1322  
Total reads = 0



**D) PPB Case 14 cell line miRNA sequencing**  
ID=MI0006653\_1;accession\_number=MI0006653;Name=hsa-mir-1322  
Total reads = 0



**B) Normal fibroblast miRNA sequencing**  
ID=MI0003610\_1;accession\_number=MI0003610;Name=hsa-mir-598  
Total reads = 0



**C) PPB Case 14 tumor miRNA sequencing**  
ID=MI0003610\_1;accession\_number=MI0003610;Name=hsa-mir-598  
Total reads = 0



**D) PPB Case 14 cell line miRNA sequencing**  
ID=MI0003610\_1;accession\_number=MI0003610;Name=hsa-mir-598  
Total reads = 0



**B) Normal fibroblast miRNA sequencing**  
ID=MI0019298\_1;accession\_number=MI0019298;Name=hsa-mir-5692a-2  
Total reads = 0



**C) PPB Case 14 tumor miRNA sequencing**  
ID=MI0019298\_1;accession\_number=MI0019298;Name=hsa-mir-5692a-2  
Total reads = 0



**D) PPB Case 14 cell line miRNA sequencing**  
ID=MI0019298\_1;accession\_number=MI0019298;Name=hsa-mir-5692a-2  
Total reads = 0



**B) Normal fibroblast miRNA sequencing**  
ID=MI0016434\_1;accession\_number=MI0016434;Name=hsa-mir-3926-1  
Total reads = 0



**C) PPB Case 14 tumor miRNA sequencing**  
ID=MI0016434\_1;accession\_number=MI0016434;Name=hsa-mir-3926-1  
Total reads = 0



**D) PPB Case 14 cell line miRNA sequencing**  
ID=MI0016434\_1;accession\_number=MI0016434;Name=hsa-mir-3926-1  
Total reads = 0



**B) Normal fibroblast miRNA sequencing**  
ID=MI0016437\_1;accession\_number=MI0016437;Name=hsa-mir-3926-2  
Total reads = 0



**C) PPB Case 14 tumor miRNA sequencing**  
ID=MI0016437\_1;accession\_number=MI0016437;Name=hsa-mir-3926-2  
Total reads = 0



**D) PPB Case 14 cell line miRNA sequencing**  
ID=MI0016437\_1;accession\_number=MI0016437;Name=hsa-mir-3926-2  
Total reads = 0





**B) Normal fibroblast miRNA sequencing**  
ID=MI0000791\_1;accession\_number=MI0000791;Name=hsa-mir-383  
Total reads = 0



**C) PPB Case 14 tumor miRNA sequencing**  
ID=MI0000791\_1;accession\_number=MI0000791;Name=hsa-mir-383  
Total reads = 0



**D) PPB Case 14 cell line miRNA sequencing**  
ID=MI0000791\_1;accession\_number=MI0000791;Name=hsa-mir-383  
Total reads = 0



**B) Normal fibroblast miRNA sequencing**  
ID=MI0014174\_1;accession\_number=MI0014174;Name=hsa-mir-548v  
Total reads = 0



**C) PPB Case 14 tumor miRNA sequencing**  
ID=MI0014174\_1;accession\_number=MI0014174;Name=hsa-mir-548v  
Total reads = 0



**D) PPB Case 14 cell line miRNA sequencing**  
ID=MI0014174\_1;accession\_number=MI0014174;Name=hsa-mir-548v  
Total reads = 0



**B) Normal fibroblast miRNA sequencing**  
ID=MI0006414\_1;accession\_number=MI0006414;Name=hsa-mir-548h-4  
Total reads = 0



**C) PPB Case 14 tumor miRNA sequencing**  
ID=MI0006414\_1;accession\_number=MI0006414;Name=hsa-mir-548h-4  
Total reads = 0



**D) PPB Case 14 cell line miRNA sequencing**  
ID=MI0006414\_1;accession\_number=MI0006414;Name=hsa-mir-548h-4  
Total reads = 0



**B) Normal fibroblast miRNA sequencing**  
ID=MI0016014\_1;accession\_number=MI0016014;Name=hsa-mir-3622b  
Total reads = 0



**C) PPB Case 14 tumor miRNA sequencing**  
ID=MI0016014\_1;accession\_number=MI0016014;Name=hsa-mir-3622b  
Total reads = 0



**D) PPB Case 14 cell line miRNA sequencing**  
ID=MI0016014\_1;accession\_number=MI0016014;Name=hsa-mir-3622b  
Total reads = 0



**B) Normal fibroblast miRNA sequencing**  
ID=MI0016013\_1;accession\_number=MI0016013;Name=hsa-mir-3622a  
Total reads = 0



**C) PPB Case 14 tumor miRNA sequencing**  
ID=MI0016013\_1;accession\_number=MI0016013;Name=hsa-mir-3622a  
Total reads = 0



**D) PPB Case 14 cell line miRNA sequencing**  
ID=MI0016013\_1;accession\_number=MI0016013;Name=hsa-mir-3622a  
Total reads = 0



**B) Normal fibroblast miRNA sequencing**  
ID=MI0015895\_1;accession\_number=MI0015895;Name=hsa-mir-4287  
Total reads = 0



**C) PPB Case 14 tumor miRNA sequencing**  
ID=MI0015895\_1;accession\_number=MI0015895;Name=hsa-mir-4287  
Total reads = 0



**D) PPB Case 14 cell line miRNA sequencing**  
ID=MI0015895\_1;accession\_number=MI0015895;Name=hsa-mir-4287  
Total reads = 0



**B) Normal fibroblast miRNA sequencing**  
ID=MI0015896\_1;accession\_number=MI0015896;Name=hsa-mir-4288  
Total reads = 0



**C) PPB Case 14 tumor miRNA sequencing**  
ID=MI0015896\_1;accession\_number=MI0015896;Name=hsa-mir-4288  
Total reads = 0



**D) PPB Case 14 cell line miRNA sequencing**  
ID=MI0015896\_1;accession\_number=MI0015896;Name=hsa-mir-4288  
Total reads = 0



**B) Normal fibroblast miRNA sequencing**  
ID=MI0014175\_1;accession\_number=MI0014175;Name=hsa-mir-3148  
Total reads = 0



**C) PPB Case 14 tumor miRNA sequencing**  
ID=MI0014175\_1;accession\_number=MI0014175;Name=hsa-mir-3148  
Total reads = 0



**D) PPB Case 14 cell line miRNA sequencing**  
ID=MI0014175\_1;accession\_number=MI0014175;Name=hsa-mir-3148  
Total reads = 0





**B) Normal fibroblast miRNA sequencing**  
ID=MI0017871\_1;accession\_number=MI0017871;Name=hsa-mir-548ao  
Total reads = 0



**C) PPB Case 14 tumor miRNA sequencing**  
ID=MI0017871\_1;accession\_number=MI0017871;Name=hsa-mir-548ao  
Total reads = 0



**D) PPB Case 14 cell line miRNA sequencing**  
ID=MI0017871\_1;accession\_number=MI0017871;Name=hsa-mir-548ao  
Total reads = 0



**B) Normal fibroblast miRNA sequencing**  
ID=MI0002470\_1;accession\_number=MI0002470;Name=hsa-mir-486  
Total reads = 0



**C) PPB Case 14 tumor miRNA sequencing**  
ID=MI0002470\_1;accession\_number=MI0002470;Name=hsa-mir-486  
Total reads = 2

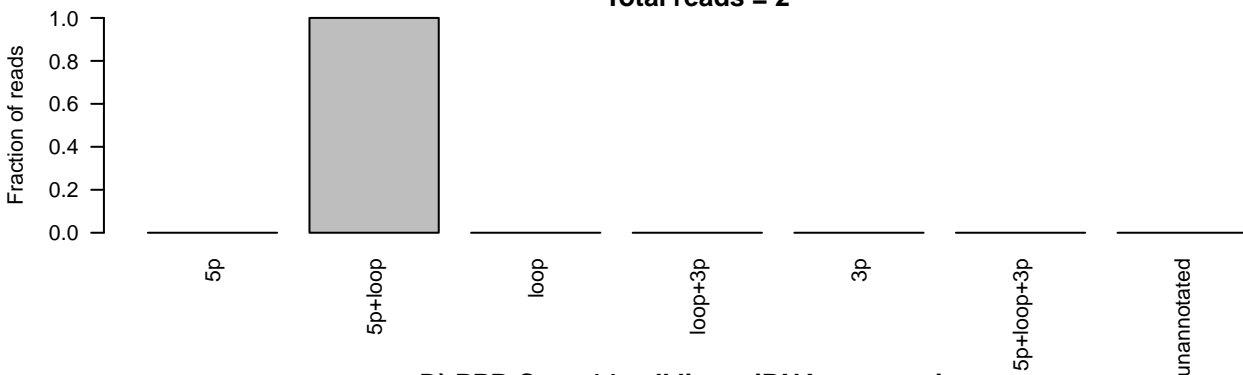

**D) PPB Case 14 cell line miRNA sequencing**  
ID=MI0002470\_1;accession\_number=MI0002470;Name=hsa-mir-486  
Total reads = 0



**B) Normal fibroblast miRNA sequencing**  
ID=MI0016820\_1;accession\_number=MI0016820;Name=hsa-mir-4469  
Total reads = 0



**C) PPB Case 14 tumor miRNA sequencing**  
ID=MI0016820\_1;accession\_number=MI0016820;Name=hsa-mir-4469  
Total reads = 0



**D) PPB Case 14 cell line miRNA sequencing**  
ID=MI0016820\_1;accession\_number=MI0016820;Name=hsa-mir-4469  
Total reads = 0



**B) Normal fibroblast miRNA sequencing**  
ID=MI0000444\_1;accession\_number=MI0000444;Name=hsa-mir-124-2  
Total reads = 0



**C) PPB Case 14 tumor miRNA sequencing**  
ID=MI0000444\_1;accession\_number=MI0000444;Name=hsa-mir-124-2  
Total reads = 0



**D) PPB Case 14 cell line miRNA sequencing**  
ID=MI0000444\_1;accession\_number=MI0000444;Name=hsa-mir-124-2  
Total reads = 0



**B) Normal fibroblast miRNA sequencing**  
ID=MI0019281\_1;accession\_number=MI0019281;Name=hsa-mir-5681a  
Total reads = 0



**C) PPB Case 14 tumor miRNA sequencing**  
ID=MI0019281\_1;accession\_number=MI0019281;Name=hsa-mir-5681a  
Total reads = 0



**D) PPB Case 14 cell line miRNA sequencing**  
ID=MI0019281\_1;accession\_number=MI0019281;Name=hsa-mir-5681a  
Total reads = 0



**B) Normal fibroblast miRNA sequencing**  
ID=MI0019293\_1;accession\_number=MI0019293;Name=hsa-mir-5681b  
Total reads = 0



**C) PPB Case 14 tumor miRNA sequencing**  
ID=MI0019293\_1;accession\_number=MI0019293;Name=hsa-mir-5681b  
Total reads = 0



**D) PPB Case 14 cell line miRNA sequencing**  
ID=MI0019293\_1;accession\_number=MI0019293;Name=hsa-mir-5681b  
Total reads = 0



**B) Normal fibroblast miRNA sequencing**  
ID=MI0010486\_1;accession\_number=MI0010486;Name=hsa-mir-2052  
Total reads = 0



**C) PPB Case 14 tumor miRNA sequencing**  
ID=MI0010486\_1;accession\_number=MI0010486;Name=hsa-mir-2052  
Total reads = 0



**D) PPB Case 14 cell line miRNA sequencing**  
ID=MI0010486\_1;accession\_number=MI0010486;Name=hsa-mir-2052  
Total reads = 0



**B) Normal fibroblast miRNA sequencing**  
ID=MI0014176\_1;accession\_number=MI0014176;Name=hsa-mir-3149  
Total reads = 0



**C) PPB Case 14 tumor miRNA sequencing**  
ID=MI0014176\_1;accession\_number=MI0014176;Name=hsa-mir-3149  
Total reads = 0



**D) PPB Case 14 cell line miRNA sequencing**  
ID=MI0014176\_1;accession\_number=MI0014176;Name=hsa-mir-3149  
Total reads = 0





**B) Normal fibroblast miRNA sequencing**  
ID=MI0019316\_1;accession\_number=MI0019316;Name=hsa-mir-5708  
Total reads = 0



**C) PPB Case 14 tumor miRNA sequencing**  
ID=MI0019316\_1;accession\_number=MI0019316;Name=hsa-mir-5708  
Total reads = 0



**D) PPB Case 14 cell line miRNA sequencing**  
ID=MI0019316\_1;accession\_number=MI0019316;Name=hsa-mir-5708  
Total reads = 0



**B) Normal fibroblast miRNA sequencing**  
ID=MI0017289\_1;accession\_number=MI0017289;Name=hsa-mir-4661  
Total reads = 0



**C) PPB Case 14 tumor miRNA sequencing**  
ID=MI0017289\_1;accession\_number=MI0017289;Name=hsa-mir-4661  
Total reads = 0



**D) PPB Case 14 cell line miRNA sequencing**  
ID=MI0017289\_1;accession\_number=MI0017289;Name=hsa-mir-4661  
Total reads = 0



**B) Normal fibroblast miRNA sequencing**  
ID=MI0003840\_1;accession\_number=MI0003840;Name=hsa-mir-378d-2  
Total reads = 0



**C) PPB Case 14 tumor miRNA sequencing**  
ID=MI0003840\_1;accession\_number=MI0003840;Name=hsa-mir-378d-2  
Total reads = 0



**D) PPB Case 14 cell line miRNA sequencing**  
ID=MI0003840\_1;accession\_number=MI0003840;Name=hsa-mir-378d-2  
Total reads = 0



**B) Normal fibroblast miRNA sequencing**  
ID=MI0016426\_1;accession\_number=MI0016426;Name=hsa-mir-3150b  
Total reads = 0



**C) PPB Case 14 tumor miRNA sequencing**  
ID=MI0016426\_1;accession\_number=MI0016426;Name=hsa-mir-3150b  
Total reads = 0



**D) PPB Case 14 cell line miRNA sequencing**  
ID=MI0016426\_1;accession\_number=MI0016426;Name=hsa-mir-3150b  
Total reads = 0



**B) Normal fibroblast miRNA sequencing**  
ID=MI0014177\_1;accession\_number=MI0014177;Name=hsa-mir-3150a  
Total reads = 0



**C) PPB Case 14 tumor miRNA sequencing**  
ID=MI0014177\_1;accession\_number=MI0014177;Name=hsa-mir-3150a  
Total reads = 0



**D) PPB Case 14 cell line miRNA sequencing**  
ID=MI0014177\_1;accession\_number=MI0014177;Name=hsa-mir-3150a  
Total reads = 0



**B) Normal fibroblast miRNA sequencing**  
ID=MI0003611\_1;accession\_number=MI0003611;Name=hsa-mir-599  
Total reads = 0



**C) PPB Case 14 tumor miRNA sequencing**  
ID=MI0003611\_1;accession\_number=MI0003611;Name=hsa-mir-599  
Total reads = 0



**D) PPB Case 14 cell line miRNA sequencing**  
ID=MI0003611\_1;accession\_number=MI0003611;Name=hsa-mir-599  
Total reads = 0



**B) Normal fibroblast miRNA sequencing**  
ID=MI0005541\_1;accession\_number=MI0005541;Name=hsa-mir-875  
Total reads = 0



**C) PPB Case 14 tumor miRNA sequencing**  
ID=MI0005541\_1;accession\_number=MI0005541;Name=hsa-mir-875  
Total reads = 0



**D) PPB Case 14 cell line miRNA sequencing**  
ID=MI0005541\_1;accession\_number=MI0005541;Name=hsa-mir-875  
Total reads = 0



**B) Normal fibroblast miRNA sequencing**  
ID=MI0006409\_1;accession\_number=MI0006409;Name=hsa-mir-1273a  
Total reads = 0



**C) PPB Case 14 tumor miRNA sequencing**  
ID=MI0006409\_1;accession\_number=MI0006409;Name=hsa-mir-1273a  
Total reads = 0



**D) PPB Case 14 cell line miRNA sequencing**  
ID=MI0006409\_1;accession\_number=MI0006409;Name=hsa-mir-1273a  
Total reads = 0





**B) Normal fibroblast miRNA sequencing**  
ID=MI0016822\_1;accession\_number=MI0016822;Name=hsa-mir-4471  
Total reads = 0



**C) PPB Case 14 tumor miRNA sequencing**  
ID=MI0016822\_1;accession\_number=MI0016822;Name=hsa-mir-4471  
Total reads = 0



**D) PPB Case 14 cell line miRNA sequencing**  
ID=MI0016822\_1;accession\_number=MI0016822;Name=hsa-mir-4471  
Total reads = 0



**B) Normal fibroblast miRNA sequencing**  
ID=MI0019280\_1;accession\_number=MI0019280;Name=hsa-mir-5680  
Total reads = 0



**C) PPB Case 14 tumor miRNA sequencing**  
ID=MI0019280\_1;accession\_number=MI0019280;Name=hsa-mir-5680  
Total reads = 0



**D) PPB Case 14 cell line miRNA sequencing**  
ID=MI0019280\_1;accession\_number=MI0019280;Name=hsa-mir-5680  
Total reads = 0



**B) Normal fibroblast miRNA sequencing**  
ID=MI0014178\_1;accession\_number=MI0014178;Name=hsa-mir-3151  
Total reads = 0



**C) PPB Case 14 tumor miRNA sequencing**  
ID=MI0014178\_1;accession\_number=MI0014178;Name=hsa-mir-3151  
Total reads = 0



**D) PPB Case 14 cell line miRNA sequencing**  
ID=MI0014178\_1;accession\_number=MI0014178;Name=hsa-mir-3151  
Total reads = 0



**B) Normal fibroblast miRNA sequencing**  
ID=MI0003612\_1;accession\_number=MI0003612;Name=hsa-mir-548a-3  
Total reads = 0



**C) PPB Case 14 tumor miRNA sequencing**  
ID=MI0003612\_1;accession\_number=MI0003612;Name=hsa-mir-548a-3  
Total reads = 2

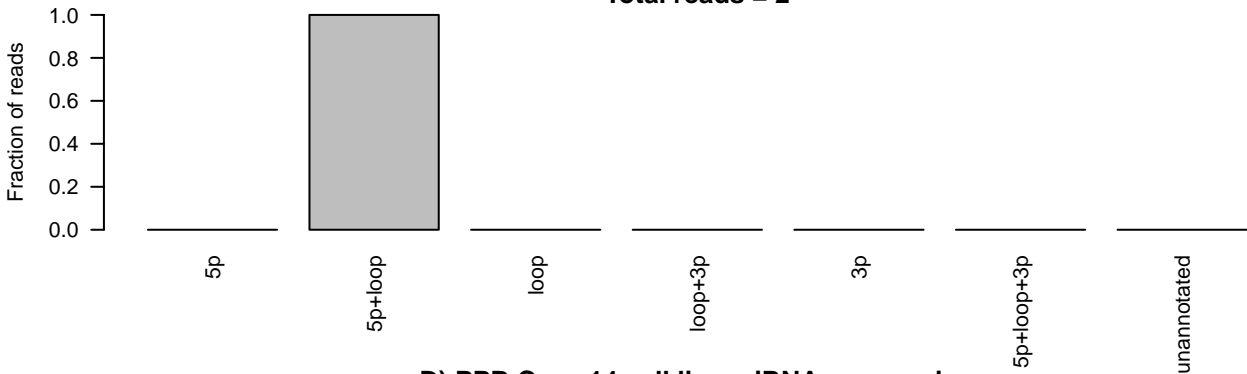

**D) PPB Case 14 cell line miRNA sequencing**  
ID=MI0003612\_1;accession\_number=MI0003612;Name=hsa-mir-548a-3  
Total reads = 1

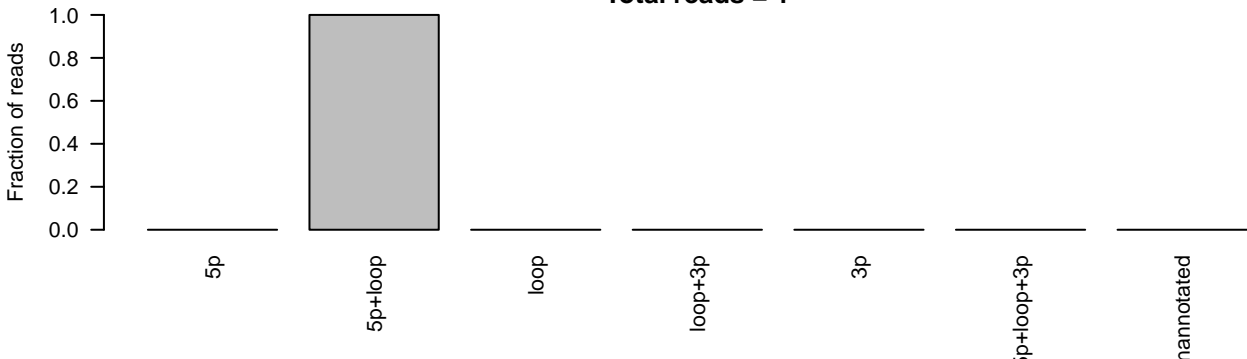

**B) Normal fibroblast miRNA sequencing**  
ID=MI0010487\_1;accession\_number=MI0010487;Name=hsa-mir-2053  
Total reads = 0



**C) PPB Case 14 tumor miRNA sequencing**  
ID=MI0010487\_1;accession\_number=MI0010487;Name=hsa-mir-2053  
Total reads = 0



**D) PPB Case 14 cell line miRNA sequencing**  
ID=MI0010487\_1;accession\_number=MI0010487;Name=hsa-mir-2053  
Total reads = 0



**B) Normal fibroblast miRNA sequencing**  
ID=MI0016000\_1;accession\_number=MI0016000;Name=hsa-mir-3610  
Total reads = 0



**C) PPB Case 14 tumor miRNA sequencing**  
ID=MI0016000\_1;accession\_number=MI0016000;Name=hsa-mir-3610  
Total reads = 0



**D) PPB Case 14 cell line miRNA sequencing**  
ID=MI0016000\_1;accession\_number=MI0016000;Name=hsa-mir-3610  
Total reads = 0



**B) Normal fibroblast miRNA sequencing**  
ID=MI0022212\_1;accession\_number=MI0022212;Name=hsa-mir-548az  
Total reads = 0



**C) PPB Case 14 tumor miRNA sequencing**  
ID=MI0022212\_1;accession\_number=MI0022212;Name=hsa-mir-548az  
Total reads = 0



**D) PPB Case 14 cell line miRNA sequencing**  
ID=MI0022212\_1;accession\_number=MI0022212;Name=hsa-mir-548az  
Total reads = 0



**B) Normal fibroblast miRNA sequencing**  
ID=MI0017292\_1;accession\_number=MI0017292;Name=hsa-mir-4663  
Total reads = 0



**C) PPB Case 14 tumor miRNA sequencing**  
ID=MI0017292\_1;accession\_number=MI0017292;Name=hsa-mir-4663  
Total reads = 0



**D) PPB Case 14 cell line miRNA sequencing**  
ID=MI0017292\_1;accession\_number=MI0017292;Name=hsa-mir-4663  
Total reads = 0





**B) Normal fibroblast miRNA sequencing**  
ID=MI0003668\_1;accession\_number=MI0003668;Name=hsa-mir-548d-1  
Total reads = 0



**C) PPB Case 14 tumor miRNA sequencing**  
ID=MI0003668\_1;accession\_number=MI0003668;Name=hsa-mir-548d-1  
Total reads = 5

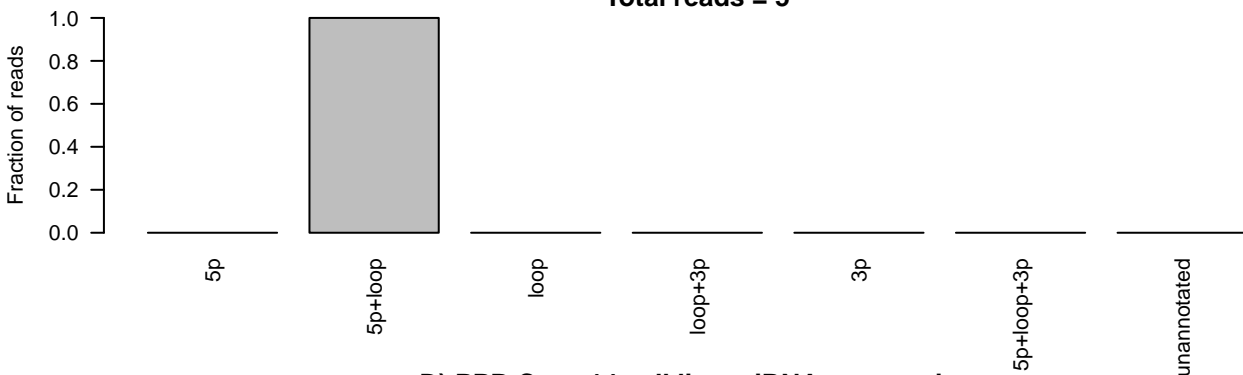

**D) PPB Case 14 cell line miRNA sequencing**  
ID=MI0003668\_1;accession\_number=MI0003668;Name=hsa-mir-548d-1  
Total reads = 3



**B) Normal fibroblast miRNA sequencing**  
ID=MI0016689\_1;accession\_number=MI0016689;Name=hsa-mir-548aa-1  
Total reads = 0



**C) PPB Case 14 tumor miRNA sequencing**  
ID=MI0016689\_1;accession\_number=MI0016689;Name=hsa-mir-548aa-1  
Total reads = 0



**D) PPB Case 14 cell line miRNA sequencing**  
ID=MI0016689\_1;accession\_number=MI0016689;Name=hsa-mir-548aa-1  
Total reads = 0



**B) Normal fibroblast miRNA sequencing**  
ID=MI0017293\_1;accession\_number=MI0017293;Name=hsa-mir-4662b  
Total reads = 0



**C) PPB Case 14 tumor miRNA sequencing**  
ID=MI0017293\_1;accession\_number=MI0017293;Name=hsa-mir-4662b  
Total reads = 0



**D) PPB Case 14 cell line miRNA sequencing**  
ID=MI0017293\_1;accession\_number=MI0017293;Name=hsa-mir-4662b  
Total reads = 0



**B) Normal fibroblast miRNA sequencing**  
ID=MI0017290\_1;accession\_number=MI0017290;Name=hsa-mir-4662a  
Total reads = 0



**C) PPB Case 14 tumor miRNA sequencing**  
ID=MI0017290\_1;accession\_number=MI0017290;Name=hsa-mir-4662a  
Total reads = 0



**D) PPB Case 14 cell line miRNA sequencing**  
ID=MI0017290\_1;accession\_number=MI0017290;Name=hsa-mir-4662a  
Total reads = 0



**B) Normal fibroblast miRNA sequencing**  
ID=MI0006337\_1;accession\_number=MI0006337;Name=hsa-mir-1204  
Total reads = 0



**C) PPB Case 14 tumor miRNA sequencing**  
ID=MI0006337\_1;accession\_number=MI0006337;Name=hsa-mir-1204  
Total reads = 0



**D) PPB Case 14 cell line miRNA sequencing**  
ID=MI0006337\_1;accession\_number=MI0006337;Name=hsa-mir-1204  
Total reads = 0



**B) Normal fibroblast miRNA sequencing**  
ID=MI0006338\_1;accession\_number=MI0006338;Name=hsa-mir-1205  
Total reads = 0



**C) PPB Case 14 tumor miRNA sequencing**  
ID=MI0006338\_1;accession\_number=MI0006338;Name=hsa-mir-1205  
Total reads = 0



**D) PPB Case 14 cell line miRNA sequencing**  
ID=MI0006338\_1;accession\_number=MI0006338;Name=hsa-mir-1205  
Total reads = 0



**B) Normal fibroblast miRNA sequencing**  
ID=MI0006339\_1;accession\_number=MI0006339;Name=hsa-mir-1206  
Total reads = 0



**C) PPB Case 14 tumor miRNA sequencing**  
ID=MI0006339\_1;accession\_number=MI0006339;Name=hsa-mir-1206  
Total reads = 0



**D) PPB Case 14 cell line miRNA sequencing**  
ID=MI0006339\_1;accession\_number=MI0006339;Name=hsa-mir-1206  
Total reads = 0



**B) Normal fibroblast miRNA sequencing**  
ID=MI0006340\_1;accession\_number=MI0006340;Name=hsa-mir-1207  
Total reads = 0



**C) PPB Case 14 tumor miRNA sequencing**  
ID=MI0006340\_1;accession\_number=MI0006340;Name=hsa-mir-1207  
Total reads = 0



**D) PPB Case 14 cell line miRNA sequencing**  
ID=MI0006340\_1;accession\_number=MI0006340;Name=hsa-mir-1207  
Total reads = 0





**B) Normal fibroblast miRNA sequencing**  
ID=MI0006341\_1;accession\_number=MI0006341;Name=hsa-mir-1208  
Total reads = 0



**C) PPB Case 14 tumor miRNA sequencing**  
ID=MI0006341\_1;accession\_number=MI0006341;Name=hsa-mir-1208  
Total reads = 0



**D) PPB Case 14 cell line miRNA sequencing**  
ID=MI0006341\_1;accession\_number=MI0006341;Name=hsa-mir-1208  
Total reads = 0



**B) Normal fibroblast miRNA sequencing**  
ID=MI0016087\_1;accession\_number=MI0016087;Name=hsa-mir-3686  
Total reads = 0



**C) PPB Case 14 tumor miRNA sequencing**  
ID=MI0016087\_1;accession\_number=MI0016087;Name=hsa-mir-3686  
Total reads = 0



**D) PPB Case 14 cell line miRNA sequencing**  
ID=MI0016087\_1;accession\_number=MI0016087;Name=hsa-mir-3686  
Total reads = 0



**B) Normal fibroblast miRNA sequencing**  
ID=MI0016074\_1;accession\_number=MI0016074;Name=hsa-mir-3673  
Total reads = 0



**C) PPB Case 14 tumor miRNA sequencing**  
ID=MI0016074\_1;accession\_number=MI0016074;Name=hsa-mir-3673  
Total reads = 0



**D) PPB Case 14 cell line miRNA sequencing**  
ID=MI0016074\_1;accession\_number=MI0016074;Name=hsa-mir-3673  
Total reads = 0



**B) Normal fibroblast miRNA sequencing**  
ID=MI0016070\_1;accession\_number=MI0016070;Name=hsa-mir-3669  
Total reads = 0



**C) PPB Case 14 tumor miRNA sequencing**  
ID=MI0016070\_1;accession\_number=MI0016070;Name=hsa-mir-3669  
Total reads = 0



**D) PPB Case 14 cell line miRNA sequencing**  
ID=MI0016070\_1;accession\_number=MI0016070;Name=hsa-mir-3669  
Total reads = 0



**B) Normal fibroblast miRNA sequencing**  
ID=MI0018173\_1;accession\_number=MI0018173;Name=hsa-mir-5194  
Total reads = 0



**C) PPB Case 14 tumor miRNA sequencing**  
ID=MI0018173\_1;accession\_number=MI0018173;Name=hsa-mir-5194  
Total reads = 0



**D) PPB Case 14 cell line miRNA sequencing**  
ID=MI0018173\_1;accession\_number=MI0018173;Name=hsa-mir-5194  
Total reads = 0



**B) Normal fibroblast miRNA sequencing**  
ID=MI0006368\_1;accession\_number=MI0006368;Name=hsa-mir-1302-7  
Total reads = 0



**C) PPB Case 14 tumor miRNA sequencing**  
ID=MI0006368\_1;accession\_number=MI0006368;Name=hsa-mir-1302-7  
Total reads = 0



**D) PPB Case 14 cell line miRNA sequencing**  
ID=MI0006368\_1;accession\_number=MI0006368;Name=hsa-mir-1302-7  
Total reads = 0



**B) Normal fibroblast miRNA sequencing**  
ID=MI0016823\_1;accession\_number=MI0016823;Name=hsa-mir-4472-1  
Total reads = 0



**C) PPB Case 14 tumor miRNA sequencing**  
ID=MI0016823\_1;accession\_number=MI0016823;Name=hsa-mir-4472-1  
Total reads = 0



**D) PPB Case 14 cell line miRNA sequencing**  
ID=MI0016823\_1;accession\_number=MI0016823;Name=hsa-mir-4472-1  
Total reads = 0



**B) Normal fibroblast miRNA sequencing**  
ID=MI0017294\_1;accession\_number=MI0017294;Name=hsa-mir-4664  
Total reads = 0



**C) PPB Case 14 tumor miRNA sequencing**  
ID=MI0017294\_1;accession\_number=MI0017294;Name=hsa-mir-4664  
Total reads = 0



**D) PPB Case 14 cell line miRNA sequencing**  
ID=MI0017294\_1;accession\_number=MI0017294;Name=hsa-mir-4664  
Total reads = 0





**B) Normal fibroblast miRNA sequencing**  
ID=MI0005759\_1;accession\_number=MI0005759;Name=hsa-mir-937  
Total reads = 0



**C) PPB Case 14 tumor miRNA sequencing**  
ID=MI0005759\_1;accession\_number=MI0005759;Name=hsa-mir-937  
Total reads = 0



**D) PPB Case 14 cell line miRNA sequencing**  
ID=MI0005759\_1;accession\_number=MI0005759;Name=hsa-mir-937  
Total reads = 0



**B) Normal fibroblast miRNA sequencing**  
ID=MI0003669\_1;accession\_number=MI0003669;Name=hsa-mir-661  
Total reads = 0



**C) PPB Case 14 tumor miRNA sequencing**  
ID=MI0003669\_1;accession\_number=MI0003669;Name=hsa-mir-661  
Total reads = 0



**D) PPB Case 14 cell line miRNA sequencing**  
ID=MI0003669\_1;accession\_number=MI0003669;Name=hsa-mir-661  
Total reads = 0



**B) Normal fibroblast miRNA sequencing**  
ID=MI0005761\_1;accession\_number=MI0005761;Name=hsa-mir-939  
Total reads = 0



**C) PPB Case 14 tumor miRNA sequencing**  
ID=MI0005761\_1;accession\_number=MI0005761;Name=hsa-mir-939  
Total reads = 0



**D) PPB Case 14 cell line miRNA sequencing**  
ID=MI0005761\_1;accession\_number=MI0005761;Name=hsa-mir-939  
Total reads = 0



**B) Normal fibroblast miRNA sequencing**  
ID=MI0006324\_1;accession\_number=MI0006324;Name=hsa-mir-1234  
Total reads = 0



**C) PPB Case 14 tumor miRNA sequencing**  
ID=MI0006324\_1;accession\_number=MI0006324;Name=hsa-mir-1234  
Total reads = 0



**D) PPB Case 14 cell line miRNA sequencing**  
ID=MI0006324\_1;accession\_number=MI0006324;Name=hsa-mir-1234  
Total reads = 2

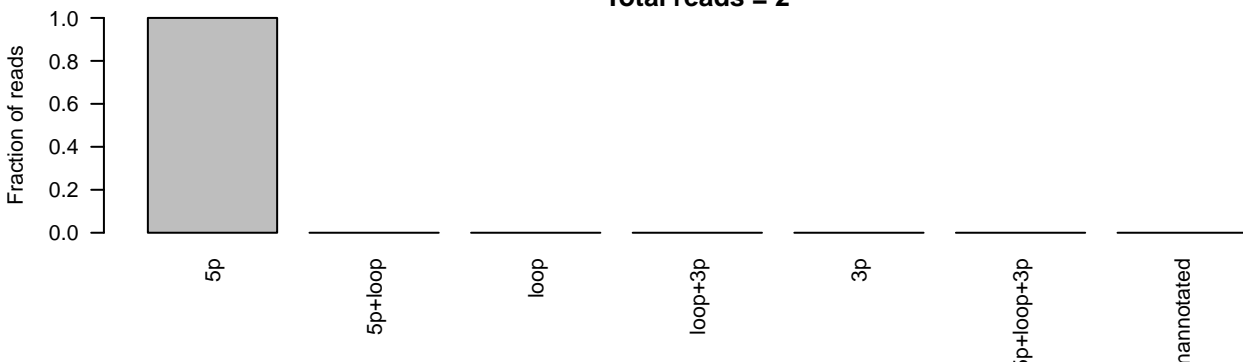

**B) Normal fibroblast miRNA sequencing**  
ID=MI0015980\_1;accession\_number=MI0015980;Name=hsa-mir-1302-11  
Total reads = 0



**C) PPB Case 14 tumor miRNA sequencing**  
ID=MI0015980\_1;accession\_number=MI0015980;Name=hsa-mir-1302-11  
Total reads = 0



**D) PPB Case 14 cell line miRNA sequencing**  
ID=MI0015980\_1;accession\_number=MI0015980;Name=hsa-mir-1302-11  
Total reads = 0



**B) Normal fibroblast miRNA sequencing**  
ID=MI0017295\_1;accession\_number=MI0017295;Name=hsa-mir-4665  
Total reads = 0



**C) PPB Case 14 tumor miRNA sequencing**  
ID=MI0017295\_1;accession\_number=MI0017295;Name=hsa-mir-4665  
Total reads = 0



**D) PPB Case 14 cell line miRNA sequencing**  
ID=MI0017295\_1;accession\_number=MI0017295;Name=hsa-mir-4665  
Total reads = 0



**B) Normal fibroblast miRNA sequencing**  
ID=MI0014179\_1;accession\_number=MI0014179;Name=hsa-mir-3152  
Total reads = 0



**C) PPB Case 14 tumor miRNA sequencing**  
ID=MI0014179\_1;accession\_number=MI0014179;Name=hsa-mir-3152  
Total reads = 0



**D) PPB Case 14 cell line miRNA sequencing**  
ID=MI0014179\_1;accession\_number=MI0014179;Name=hsa-mir-3152  
Total reads = 0



**B) Normal fibroblast miRNA sequencing**  
ID=MI0016825\_1;accession\_number=MI0016825;Name=hsa-mir-4473  
Total reads = 0



**C) PPB Case 14 tumor miRNA sequencing**  
ID=MI0016825\_1;accession\_number=MI0016825;Name=hsa-mir-4473  
Total reads = 0



**D) PPB Case 14 cell line miRNA sequencing**  
ID=MI0016825\_1;accession\_number=MI0016825;Name=hsa-mir-4473  
Total reads = 0





**B) Normal fibroblast miRNA sequencing**  
ID=MI0016826\_1;accession\_number=MI0016826;Name=hsa-mir-4474  
Total reads = 0



**C) PPB Case 14 tumor miRNA sequencing**  
ID=MI0016826\_1;accession\_number=MI0016826;Name=hsa-mir-4474  
Total reads = 0



**D) PPB Case 14 cell line miRNA sequencing**  
ID=MI0016826\_1;accession\_number=MI0016826;Name=hsa-mir-4474  
Total reads = 0



**B) Normal fibroblast miRNA sequencing**  
ID=MI0005542\_1;accession\_number=MI0005542;Name=hsa-mir-876  
Total reads = 0



**C) PPB Case 14 tumor miRNA sequencing**  
ID=MI0005542\_1;accession\_number=MI0005542;Name=hsa-mir-876  
Total reads = 5

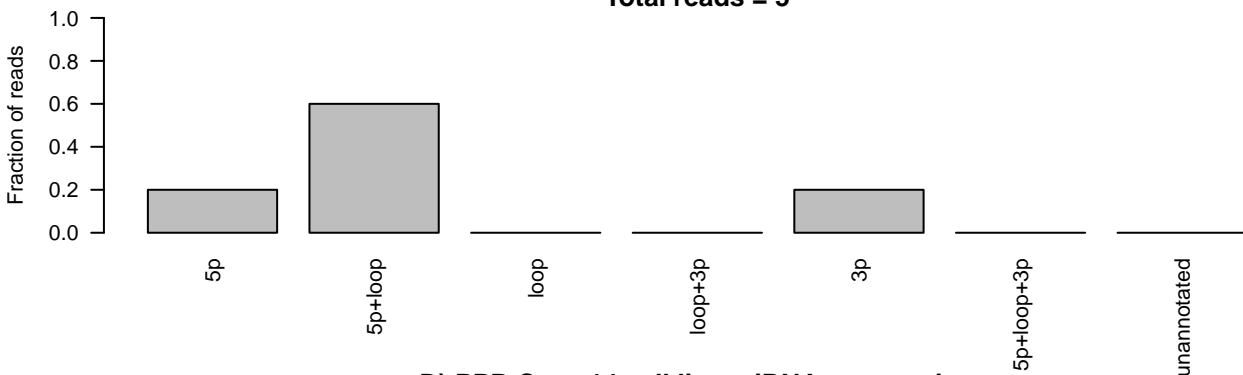

**D) PPB Case 14 cell line miRNA sequencing**  
ID=MI0005542\_1;accession\_number=MI0005542;Name=hsa-mir-876  
Total reads = 1



**B) Normal fibroblast miRNA sequencing**  
ID=MI0005564\_1;accession\_number=MI0005564;Name=hsa-mir-873  
Total reads = 0



**C) PPB Case 14 tumor miRNA sequencing**  
ID=MI0005564\_1;accession\_number=MI0005564;Name=hsa-mir-873  
Total reads = 1



**D) PPB Case 14 cell line miRNA sequencing**  
ID=MI0005564\_1;accession\_number=MI0005564;Name=hsa-mir-873  
Total reads = 2



**B) Normal fibroblast miRNA sequencing**  
ID=MI0017297\_1;accession\_number=MI0017297;Name=hsa-mir-4667  
Total reads = 0



**C) PPB Case 14 tumor miRNA sequencing**  
ID=MI0017297\_1;accession\_number=MI0017297;Name=hsa-mir-4667  
Total reads = 0



**D) PPB Case 14 cell line miRNA sequencing**  
ID=MI0017297\_1;accession\_number=MI0017297;Name=hsa-mir-4667  
Total reads = 0



**B) Normal fibroblast miRNA sequencing**  
ID=MI0016827\_1;accession\_number=MI0016827;Name=hsa-mir-4475  
Total reads = 0



**C) PPB Case 14 tumor miRNA sequencing**  
ID=MI0016827\_1;accession\_number=MI0016827;Name=hsa-mir-4475  
Total reads = 0



**D) PPB Case 14 cell line miRNA sequencing**  
ID=MI0016827\_1;accession\_number=MI0016827;Name=hsa-mir-4475  
Total reads = 0



**B) Normal fibroblast miRNA sequencing**  
ID=MI0016911\_1;accession\_number=MI0016911;Name=hsa-mir-4540  
Total reads = 0



**C) PPB Case 14 tumor miRNA sequencing**  
ID=MI0016911\_1;accession\_number=MI0016911;Name=hsa-mir-4540  
Total reads = 0



**D) PPB Case 14 cell line miRNA sequencing**  
ID=MI0016911\_1;accession\_number=MI0016911;Name=hsa-mir-4540  
Total reads = 0



**B) Normal fibroblast miRNA sequencing**  
ID=MI0016828\_1;accession\_number=MI0016828;Name=hsa-mir-4476  
Total reads = 0



**C) PPB Case 14 tumor miRNA sequencing**  
ID=MI0016828\_1;accession\_number=MI0016828;Name=hsa-mir-4476  
Total reads = 0



**D) PPB Case 14 cell line miRNA sequencing**  
ID=MI0016828\_1;accession\_number=MI0016828;Name=hsa-mir-4476  
Total reads = 0



**B) Normal fibroblast miRNA sequencing**  
ID=MI0016829\_1;accession\_number=MI0016829;Name=hsa-mir-4477a  
Total reads = 0



**C) PPB Case 14 tumor miRNA sequencing**  
ID=MI0016829\_1;accession\_number=MI0016829;Name=hsa-mir-4477a  
Total reads = 0



**D) PPB Case 14 cell line miRNA sequencing**  
ID=MI0016829\_1;accession\_number=MI0016829;Name=hsa-mir-4477a  
Total reads = 0





**B) Normal fibroblast miRNA sequencing**  
ID=MI0016830\_1;accession\_number=MI0016830;Name=hsa-mir-4477b  
Total reads = 0



**C) PPB Case 14 tumor miRNA sequencing**  
ID=MI0016830\_1;accession\_number=MI0016830;Name=hsa-mir-4477b  
Total reads = 0



**D) PPB Case 14 cell line miRNA sequencing**  
ID=MI0016830\_1;accession\_number=MI0016830;Name=hsa-mir-4477b  
Total reads = 0



**B) Normal fibroblast miRNA sequencing**  
ID=MI0006359\_1;accession\_number=MI0006359;Name=hsa-mir-1299  
Total reads = 0



**C) PPB Case 14 tumor miRNA sequencing**  
ID=MI0006359\_1;accession\_number=MI0006359;Name=hsa-mir-1299  
Total reads = 0



**D) PPB Case 14 cell line miRNA sequencing**  
ID=MI0006359\_1;accession\_number=MI0006359;Name=hsa-mir-1299  
Total reads = 0



**B) Normal fibroblast miRNA sequencing**  
ID=MI0000284\_1;accession\_number=MI0000284;Name=hsa-mir-204  
Total reads = 0



**C) PPB Case 14 tumor miRNA sequencing**  
ID=MI0000284\_1;accession\_number=MI0000284;Name=hsa-mir-204  
Total reads = 0



**D) PPB Case 14 cell line miRNA sequencing**  
ID=MI0000284\_1;accession\_number=MI0000284;Name=hsa-mir-204  
Total reads = 0



**B) Normal fibroblast miRNA sequencing**  
ID=MI0015898\_1;accession\_number=MI0015898;Name=hsa-mir-4289  
Total reads = 0



**C) PPB Case 14 tumor miRNA sequencing**  
ID=MI0015898\_1;accession\_number=MI0015898;Name=hsa-mir-4289  
Total reads = 0



**D) PPB Case 14 cell line miRNA sequencing**  
ID=MI0015898\_1;accession\_number=MI0015898;Name=hsa-mir-4289  
Total reads = 0



**B) Normal fibroblast miRNA sequencing**  
ID=MI0014180\_1;accession\_number=MI0014180;Name=hsa-mir-3153  
Total reads = 0



**C) PPB Case 14 tumor miRNA sequencing**  
ID=MI0014180\_1;accession\_number=MI0014180;Name=hsa-mir-3153  
Total reads = 0



**D) PPB Case 14 cell line miRNA sequencing**  
ID=MI0014180\_1;accession\_number=MI0014180;Name=hsa-mir-3153  
Total reads = 0



**B) Normal fibroblast miRNA sequencing**  
ID=MI0015899\_1;accession\_number=MI0015899;Name=hsa-mir-4290  
Total reads = 0



**C) PPB Case 14 tumor miRNA sequencing**  
ID=MI0015899\_1;accession\_number=MI0015899;Name=hsa-mir-4290  
Total reads = 0



**D) PPB Case 14 cell line miRNA sequencing**  
ID=MI0015899\_1;accession\_number=MI0015899;Name=hsa-mir-4290  
Total reads = 0



**B) Normal fibroblast miRNA sequencing**  
ID=MI0016414\_1;accession\_number=MI0016414;Name=hsa-mir-3910-1  
Total reads = 0



**C) PPB Case 14 tumor miRNA sequencing**  
ID=MI0016414\_1;accession\_number=MI0016414;Name=hsa-mir-3910-1  
Total reads = 0



**D) PPB Case 14 cell line miRNA sequencing**  
ID=MI0016414\_1;accession\_number=MI0016414;Name=hsa-mir-3910-1  
Total reads = 0



**B) Normal fibroblast miRNA sequencing**  
ID=MI0016431\_1;accession\_number=MI0016431;Name=hsa-mir-3910-2  
Total reads = 0



**C) PPB Case 14 tumor miRNA sequencing**  
ID=MI0016431\_1;accession\_number=MI0016431;Name=hsa-mir-3910-2  
Total reads = 0



**D) PPB Case 14 cell line miRNA sequencing**  
ID=MI0016431\_1;accession\_number=MI0016431;Name=hsa-mir-3910-2  
Total reads = 0





**B) Normal fibroblast miRNA sequencing**  
ID=MI0017301\_1;accession\_number=MI0017301;Name=hsa-mir-4670  
Total reads = 0



**C) PPB Case 14 tumor miRNA sequencing**  
ID=MI0017301\_1;accession\_number=MI0017301;Name=hsa-mir-4670  
Total reads = 0



**D) PPB Case 14 cell line miRNA sequencing**  
ID=MI0017301\_1;accession\_number=MI0017301;Name=hsa-mir-4670  
Total reads = 0



**B) Normal fibroblast miRNA sequencing**  
ID=MI0019145\_1;accession\_number=MI0019145;Name=hsa-mir-548au  
Total reads = 0



**C) PPB Case 14 tumor miRNA sequencing**  
ID=MI0019145\_1;accession\_number=MI0019145;Name=hsa-mir-548au  
Total reads = 0



**D) PPB Case 14 cell line miRNA sequencing**  
ID=MI0019145\_1;accession\_number=MI0019145;Name=hsa-mir-548au  
Total reads = 0



**B) Normal fibroblast miRNA sequencing**  
ID=MI0015900\_1;accession\_number=MI0015900;Name=hsa-mir-4291  
Total reads = 0



**C) PPB Case 14 tumor miRNA sequencing**  
ID=MI0015900\_1;accession\_number=MI0015900;Name=hsa-mir-4291  
Total reads = 0



**D) PPB Case 14 cell line miRNA sequencing**  
ID=MI0015900\_1;accession\_number=MI0015900;Name=hsa-mir-4291  
Total reads = 0



**B) Normal fibroblast miRNA sequencing**  
ID=MI0011285\_1;accession\_number=MI0011285;Name=hsa-mir-2278  
Total reads = 0



**C) PPB Case 14 tumor miRNA sequencing**  
ID=MI0011285\_1;accession\_number=MI0011285;Name=hsa-mir-2278  
Total reads = 0



**D) PPB Case 14 cell line miRNA sequencing**  
ID=MI0011285\_1;accession\_number=MI0011285;Name=hsa-mir-2278  
Total reads = 0



**B) Normal fibroblast miRNA sequencing**  
ID=MI0006369\_1;accession\_number=MI0006369;Name=hsa-mir-1302-8  
Total reads = 0



**C) PPB Case 14 tumor miRNA sequencing**  
ID=MI0006369\_1;accession\_number=MI0006369;Name=hsa-mir-1302-8  
Total reads = 0



**D) PPB Case 14 cell line miRNA sequencing**  
ID=MI0006369\_1;accession\_number=MI0006369;Name=hsa-mir-1302-8  
Total reads = 0



**B) Normal fibroblast miRNA sequencing**  
ID=MI0016435\_1;accession\_number=MI0016435;Name=hsa-mir-3927  
Total reads = 0



**C) PPB Case 14 tumor miRNA sequencing**  
ID=MI0016435\_1;accession\_number=MI0016435;Name=hsa-mir-3927  
Total reads = 0



**D) PPB Case 14 cell line miRNA sequencing**  
ID=MI0016435\_1;accession\_number=MI0016435;Name=hsa-mir-3927  
Total reads = 0



**B) Normal fibroblast miRNA sequencing**  
ID=MI0017298\_1;accession\_number=MI0017298;Name=hsa-mir-4668  
Total reads = 0



**C) PPB Case 14 tumor miRNA sequencing**  
ID=MI0017298\_1;accession\_number=MI0017298;Name=hsa-mir-4668  
Total reads = 0



**D) PPB Case 14 cell line miRNA sequencing**  
ID=MI0017298\_1;accession\_number=MI0017298;Name=hsa-mir-4668  
Total reads = 0



**B) Normal fibroblast miRNA sequencing**  
ID=MI0000262\_1;accession\_number=MI0000262;Name=hsa-mir-147a  
Total reads = 0



**C) PPB Case 14 tumor miRNA sequencing**  
ID=MI0000262\_1;accession\_number=MI0000262;Name=hsa-mir-147a  
Total reads = 0



**D) PPB Case 14 cell line miRNA sequencing**  
ID=MI0000262\_1;accession\_number=MI0000262;Name=hsa-mir-147a  
Total reads = 0





**B) Normal fibroblast miRNA sequencing**  
ID=MI0016831\_1;accession\_number=MI0016831;Name=hsa-mir-4478  
Total reads = 0



**C) PPB Case 14 tumor miRNA sequencing**  
ID=MI0016831\_1;accession\_number=MI0016831;Name=hsa-mir-4478  
Total reads = 0



**D) PPB Case 14 cell line miRNA sequencing**  
ID=MI0016831\_1;accession\_number=MI0016831;Name=hsa-mir-4478  
Total reads = 0



**B) Normal fibroblast miRNA sequencing**  
ID=MI0003613\_1;accession\_number=MI0003613;Name=hsa-mir-600  
Total reads = 0



**C) PPB Case 14 tumor miRNA sequencing**  
ID=MI0003613\_1;accession\_number=MI0003613;Name=hsa-mir-600  
Total reads = 0



**D) PPB Case 14 cell line miRNA sequencing**  
ID=MI0003613\_1;accession\_number=MI0003613;Name=hsa-mir-600  
Total reads = 0



**B) Normal fibroblast miRNA sequencing**  
ID=MI0003614\_1;accession\_number=MI0003614;Name=hsa-mir-601  
Total reads = 0



**C) PPB Case 14 tumor miRNA sequencing**  
ID=MI0003614\_1;accession\_number=MI0003614;Name=hsa-mir-601  
Total reads = 0



**D) PPB Case 14 cell line miRNA sequencing**  
ID=MI0003614\_1;accession\_number=MI0003614;Name=hsa-mir-601  
Total reads = 0



**B) Normal fibroblast miRNA sequencing**  
ID=MI0016415\_1;accession\_number=MI0016415;Name=hsa-mir-3911  
Total reads = 0



**C) PPB Case 14 tumor miRNA sequencing**  
ID=MI0016415\_1;accession\_number=MI0016415;Name=hsa-mir-3911  
Total reads = 0



**D) PPB Case 14 cell line miRNA sequencing**  
ID=MI0016415\_1;accession\_number=MI0016415;Name=hsa-mir-3911  
Total reads = 0



**B) Normal fibroblast miRNA sequencing**  
ID=MI0013006\_1;accession\_number=MI0013006;Name=hsa-mir-2861  
Total reads = 0



**C) PPB Case 14 tumor miRNA sequencing**  
ID=MI0013006\_1;accession\_number=MI0013006;Name=hsa-mir-2861  
Total reads = 0



**D) PPB Case 14 cell line miRNA sequencing**  
ID=MI0013006\_1;accession\_number=MI0013006;Name=hsa-mir-2861  
Total reads = 0



**B) Normal fibroblast miRNA sequencing**  
ID=MI0017303\_1;accession\_number=MI0017303;Name=hsa-mir-4672  
Total reads = 0



**C) PPB Case 14 tumor miRNA sequencing**  
ID=MI0017303\_1;accession\_number=MI0017303;Name=hsa-mir-4672  
Total reads = 0



**D) PPB Case 14 cell line miRNA sequencing**  
ID=MI0017303\_1;accession\_number=MI0017303;Name=hsa-mir-4672  
Total reads = 0



**B) Normal fibroblast miRNA sequencing**  
ID=MI0014182\_1;accession\_number=MI0014182;Name=hsa-mir-3154  
Total reads = 0



**C) PPB Case 14 tumor miRNA sequencing**  
ID=MI0014182\_1;accession\_number=MI0014182;Name=hsa-mir-3154  
Total reads = 0



**D) PPB Case 14 cell line miRNA sequencing**  
ID=MI0014182\_1;accession\_number=MI0014182;Name=hsa-mir-3154  
Total reads = 0



**B) Normal fibroblast miRNA sequencing**  
ID=MI0000740\_1;accession\_number=MI0000740;Name=hsa-mir-219-2  
Total reads = 0



**C) PPB Case 14 tumor miRNA sequencing**  
ID=MI0000740\_1;accession\_number=MI0000740;Name=hsa-mir-219-2  
Total reads = 2

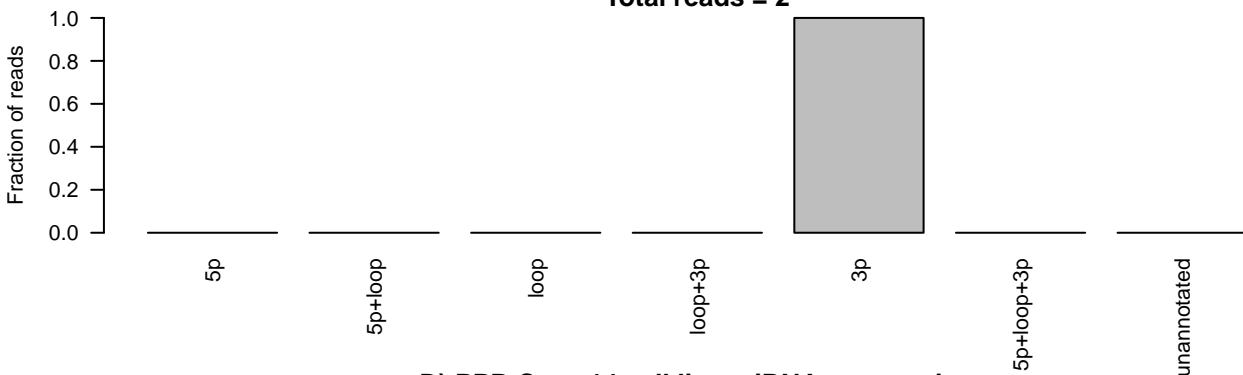

**D) PPB Case 14 cell line miRNA sequencing**  
ID=MI0000740\_1;accession\_number=MI0000740;Name=hsa-mir-219-2  
Total reads = 4

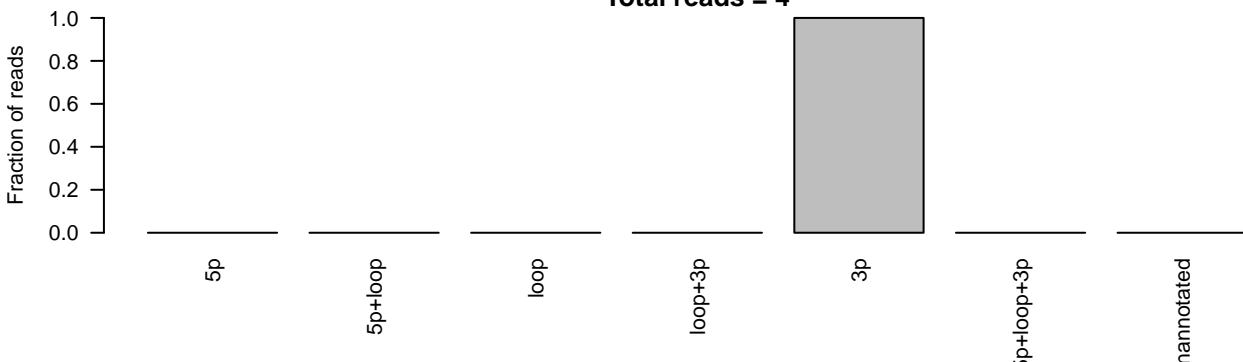



**B) Normal fibroblast miRNA sequencing**  
ID=MI0017299\_1;accession\_number=MI0017299;Name=hsa-mir-2964a  
Total reads = 0



**C) PPB Case 14 tumor miRNA sequencing**  
ID=MI0017299\_1;accession\_number=MI0017299;Name=hsa-mir-2964a  
Total reads = 2



**D) PPB Case 14 cell line miRNA sequencing**  
ID=MI0017299\_1;accession\_number=MI0017299;Name=hsa-mir-2964a  
Total reads = 4

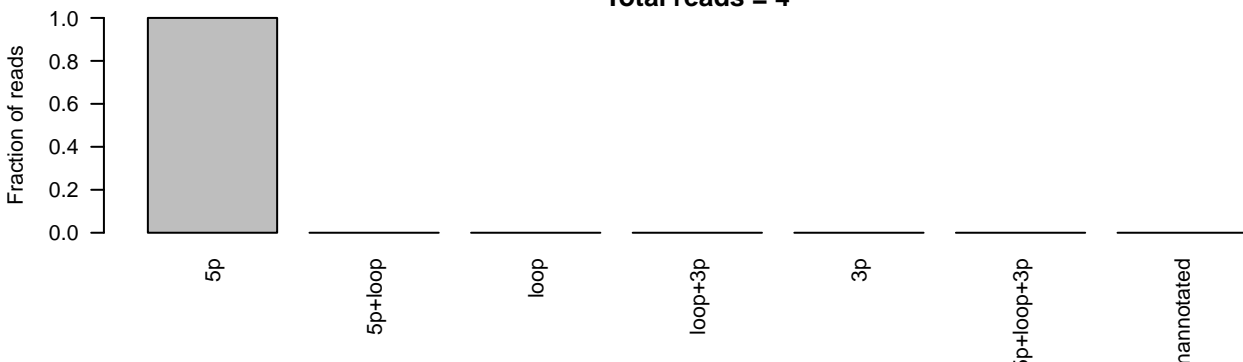

**B) Normal fibroblast miRNA sequencing**  
ID=MI0019283\_1;accession\_number=MI0019283;Name=hsa-mir-548aw  
Total reads = 0



**C) PPB Case 14 tumor miRNA sequencing**  
ID=MI0019283\_1;accession\_number=MI0019283;Name=hsa-mir-548aw  
Total reads = 0



**D) PPB Case 14 cell line miRNA sequencing**  
ID=MI0019283\_1;accession\_number=MI0019283;Name=hsa-mir-548aw  
Total reads = 0



**B) Normal fibroblast miRNA sequencing**  
ID=MI0017300\_1;accession\_number=MI0017300;Name=hsa-mir-4669  
Total reads = 0



**C) PPB Case 14 tumor miRNA sequencing**  
ID=MI0017300\_1;accession\_number=MI0017300;Name=hsa-mir-4669  
Total reads = 0



**D) PPB Case 14 cell line miRNA sequencing**  
ID=MI0017300\_1;accession\_number=MI0017300;Name=hsa-mir-4669  
Total reads = 0



**B) Normal fibroblast miRNA sequencing**  
ID=MI0016832\_1;accession\_number=MI0016832;Name=hsa-mir-3689c  
Total reads = 0



**C) PPB Case 14 tumor miRNA sequencing**  
ID=MI0016832\_1;accession\_number=MI0016832;Name=hsa-mir-3689c  
Total reads = 0



**D) PPB Case 14 cell line miRNA sequencing**  
ID=MI0016832\_1;accession\_number=MI0016832;Name=hsa-mir-3689c  
Total reads = 0



**B) Normal fibroblast miRNA sequencing**  
ID=MI0016090\_1;accession\_number=MI0016090;Name=hsa-mir-3689a  
Total reads = 0



**C) PPB Case 14 tumor miRNA sequencing**  
ID=MI0016090\_1;accession\_number=MI0016090;Name=hsa-mir-3689a  
Total reads = 0



**D) PPB Case 14 cell line miRNA sequencing**  
ID=MI0016090\_1;accession\_number=MI0016090;Name=hsa-mir-3689a  
Total reads = 1



**B) Normal fibroblast miRNA sequencing**  
ID=MI0016834\_1;accession\_number=MI0016834;Name=hsa-mir-3689d-1  
Total reads = 0



**C) PPB Case 14 tumor miRNA sequencing**  
ID=MI0016834\_1;accession\_number=MI0016834;Name=hsa-mir-3689d-1  
Total reads = 0



**D) PPB Case 14 cell line miRNA sequencing**  
ID=MI0016834\_1;accession\_number=MI0016834;Name=hsa-mir-3689d-1  
Total reads = 0



**B) Normal fibroblast miRNA sequencing**  
ID=MI0016411\_1;accession\_number=MI0016411;Name=hsa-mir-3689b  
Total reads = 0



**C) PPB Case 14 tumor miRNA sequencing**  
ID=MI0016411\_1;accession\_number=MI0016411;Name=hsa-mir-3689b  
Total reads = 0



**D) PPB Case 14 cell line miRNA sequencing**  
ID=MI0016411\_1;accession\_number=MI0016411;Name=hsa-mir-3689b  
Total reads = 0



**B) Normal fibroblast miRNA sequencing**  
ID=MI0016835\_1;accession\_number=MI0016835;Name=hsa-mir-3689d-2  
Total reads = 0



**C) PPB Case 14 tumor miRNA sequencing**  
ID=MI0016835\_1;accession\_number=MI0016835;Name=hsa-mir-3689d-2  
Total reads = 0



**D) PPB Case 14 cell line miRNA sequencing**  
ID=MI0016835\_1;accession\_number=MI0016835;Name=hsa-mir-3689d-2  
Total reads = 0





**B) Normal fibroblast miRNA sequencing**  
ID=MI0016836\_1;accession\_number=MI0016836;Name=hsa-mir-3689e  
Total reads = 0



**C) PPB Case 14 tumor miRNA sequencing**  
ID=MI0016836\_1;accession\_number=MI0016836;Name=hsa-mir-3689e  
Total reads = 0



**D) PPB Case 14 cell line miRNA sequencing**  
ID=MI0016836\_1;accession\_number=MI0016836;Name=hsa-mir-3689e  
Total reads = 0



**B) Normal fibroblast miRNA sequencing**  
ID=MI0016837\_1;accession\_number=MI0016837;Name=hsa-mir-3689f  
Total reads = 0



**C) PPB Case 14 tumor miRNA sequencing**  
ID=MI0016837\_1;accession\_number=MI0016837;Name=hsa-mir-3689f  
Total reads = 0



**D) PPB Case 14 cell line miRNA sequencing**  
ID=MI0016837\_1;accession\_number=MI0016837;Name=hsa-mir-3689f  
Total reads = 0



**B) Normal fibroblast miRNA sequencing**  
ID=MI0017304\_1;accession\_number=MI0017304;Name=hsa-mir-4673  
Total reads = 0



**C) PPB Case 14 tumor miRNA sequencing**  
ID=MI0017304\_1;accession\_number=MI0017304;Name=hsa-mir-4673  
Total reads = 0



**D) PPB Case 14 cell line miRNA sequencing**  
ID=MI0017304\_1;accession\_number=MI0017304;Name=hsa-mir-4673  
Total reads = 0



**B) Normal fibroblast miRNA sequencing**  
ID=MI0017305\_1;accession\_number=MI0017305;Name=hsa-mir-4674  
Total reads = 0



**C) PPB Case 14 tumor miRNA sequencing**  
ID=MI0017305\_1;accession\_number=MI0017305;Name=hsa-mir-4674  
Total reads = 0



**D) PPB Case 14 cell line miRNA sequencing**  
ID=MI0017305\_1;accession\_number=MI0017305;Name=hsa-mir-4674  
Total reads = 0



**B) Normal fibroblast miRNA sequencing**  
ID=MI0000471\_1;accession\_number=MI0000471;Name=hsa-mir-126  
Total reads = 0



**C) PPB Case 14 tumor miRNA sequencing**  
ID=MI0000471\_1;accession\_number=MI0000471;Name=hsa-mir-126  
Total reads = 42

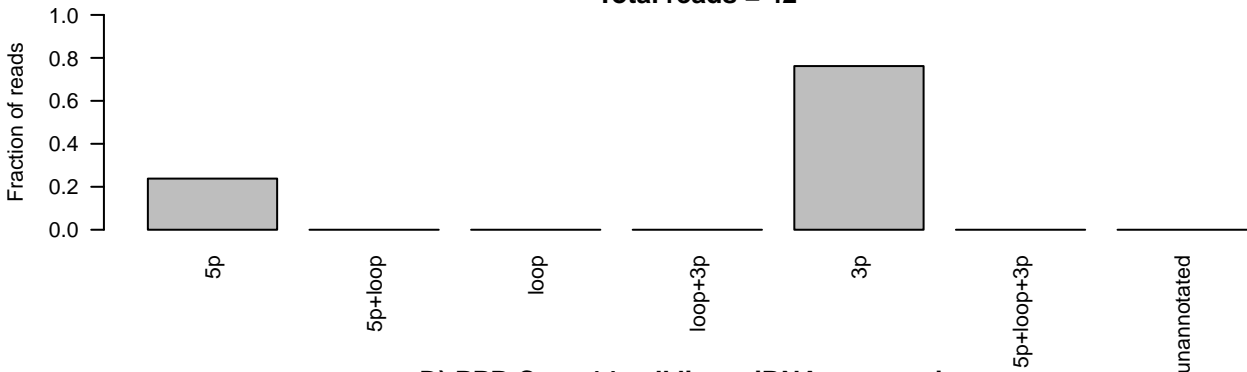

**D) PPB Case 14 cell line miRNA sequencing**  
ID=MI0000471\_1;accession\_number=MI0000471;Name=hsa-mir-126  
Total reads = 3

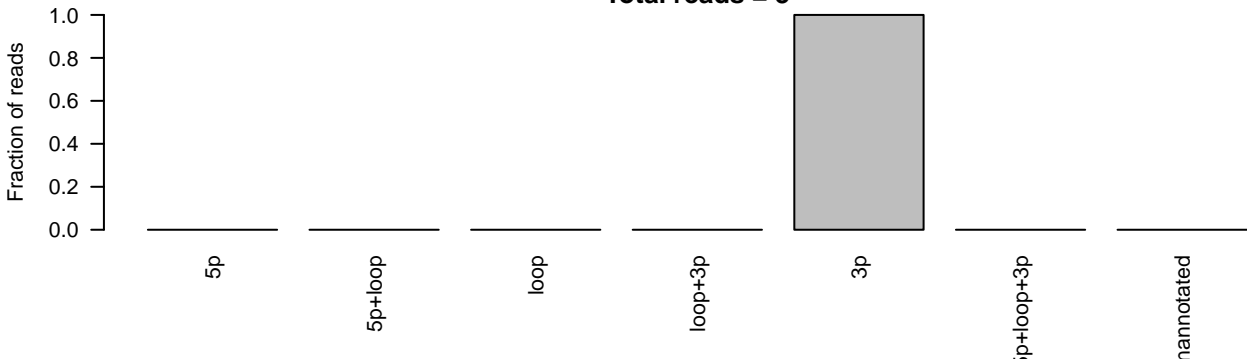

**B) Normal fibroblast miRNA sequencing**  
ID=MI0022557\_1;accession\_number=MI0022557;Name=hsa-mir-6722  
Total reads = 0



**C) PPB Case 14 tumor miRNA sequencing**  
ID=MI0022557\_1;accession\_number=MI0022557;Name=hsa-mir-6722  
Total reads = 0



**D) PPB Case 14 cell line miRNA sequencing**  
ID=MI0022557\_1;accession\_number=MI0022557;Name=hsa-mir-6722  
Total reads = 0



**B) Normal fibroblast miRNA sequencing**  
ID=MI0015897\_1;accession\_number=MI0015897;Name=hsa-mir-4292  
Total reads = 0



**C) PPB Case 14 tumor miRNA sequencing**  
ID=MI0015897\_1;accession\_number=MI0015897;Name=hsa-mir-4292  
Total reads = 0



**D) PPB Case 14 cell line miRNA sequencing**  
ID=MI0015897\_1;accession\_number=MI0015897;Name=hsa-mir-4292  
Total reads = 0



**B) Normal fibroblast miRNA sequencing**  
ID=MI0016838\_1;accession\_number=MI0016838;Name=hsa-mir-4479  
Total reads = 0



**C) PPB Case 14 tumor miRNA sequencing**  
ID=MI0016838\_1;accession\_number=MI0016838;Name=hsa-mir-4479  
Total reads = 0



**D) PPB Case 14 cell line miRNA sequencing**  
ID=MI0016838\_1;accession\_number=MI0016838;Name=hsa-mir-4479  
Total reads = 0





**B) Normal fibroblast miRNA sequencing**  
ID=MI0016012\_1;accession\_number=MI0016012;Name=hsa-mir-3621  
Total reads = 0



**C) PPB Case 14 tumor miRNA sequencing**  
ID=MI0016012\_1;accession\_number=MI0016012;Name=hsa-mir-3621  
Total reads = 0



**D) PPB Case 14 cell line miRNA sequencing**  
ID=MI0016012\_1;accession\_number=MI0016012;Name=hsa-mir-3621  
Total reads = 0



**B) Normal fibroblast miRNA sequencing**  
ID=MI0003615\_1;accession\_number=MI0003615;Name=hsa-mir-602  
Total reads = 0



**C) PPB Case 14 tumor miRNA sequencing**  
ID=MI0003615\_1;accession\_number=MI0003615;Name=hsa-mir-602  
Total reads = 0



**D) PPB Case 14 cell line miRNA sequencing**  
ID=MI0003615\_1;accession\_number=MI0003615;Name=hsa-mir-602  
Total reads = 0



**B) Normal fibroblast miRNA sequencing**  
ID=MI0016091\_1;accession\_number=MI0016091;Name=hsa-mir-3690-1  
Total reads = 0



**C) PPB Case 14 tumor miRNA sequencing**  
ID=MI0016091\_1;accession\_number=MI0016091;Name=hsa-mir-3690-1  
Total reads = 0



**D) PPB Case 14 cell line miRNA sequencing**  
ID=MI0016091\_1;accession\_number=MI0016091;Name=hsa-mir-3690-1  
Total reads = 0



**B) Normal fibroblast miRNA sequencing**  
ID=MI0020366\_1;accession\_number=MI0020366;Name=hsa-mir-6089-1  
Total reads = 0



**C) PPB Case 14 tumor miRNA sequencing**  
ID=MI0020366\_1;accession\_number=MI0020366;Name=hsa-mir-6089-1  
Total reads = 0



**D) PPB Case 14 cell line miRNA sequencing**  
ID=MI0020366\_1;accession\_number=MI0020366;Name=hsa-mir-6089-1  
Total reads = 0



**B) Normal fibroblast miRNA sequencing**  
ID=MI0017411\_1;accession\_number=MI0017411;Name=hsa-mir-4770  
Total reads = 0



**C) PPB Case 14 tumor miRNA sequencing**  
ID=MI0017411\_1;accession\_number=MI0017411;Name=hsa-mir-4770  
Total reads = 0



**D) PPB Case 14 cell line miRNA sequencing**  
ID=MI0017411\_1;accession\_number=MI0017411;Name=hsa-mir-4770  
Total reads = 0



**B) Normal fibroblast miRNA sequencing**  
ID=MI0017408\_1;accession\_number=MI0017408;Name=hsa-mir-4767  
Total reads = 0



**C) PPB Case 14 tumor miRNA sequencing**  
ID=MI0017408\_1;accession\_number=MI0017408;Name=hsa-mir-4767  
Total reads = 0



**D) PPB Case 14 cell line miRNA sequencing**  
ID=MI0017408\_1;accession\_number=MI0017408;Name=hsa-mir-4767  
Total reads = 0



**B) Normal fibroblast miRNA sequencing**  
ID=MI0003666\_1;accession\_number=MI0003666;Name=hsa-mir-651  
Total reads = 0



**C) PPB Case 14 tumor miRNA sequencing**  
ID=MI0003666\_1;accession\_number=MI0003666;Name=hsa-mir-651  
Total reads = 0



**D) PPB Case 14 cell line miRNA sequencing**  
ID=MI0003666\_1;accession\_number=MI0003666;Name=hsa-mir-651  
Total reads = 0



**B) Normal fibroblast miRNA sequencing**  
ID=MI0019286\_1;accession\_number=MI0019286;Name=hsa-mir-548ax  
Total reads = 0



**C) PPB Case 14 tumor miRNA sequencing**  
ID=MI0019286\_1;accession\_number=MI0019286;Name=hsa-mir-548ax  
Total reads = 0



**D) PPB Case 14 cell line miRNA sequencing**  
ID=MI0019286\_1;accession\_number=MI0019286;Name=hsa-mir-548ax  
Total reads = 0





**B) Normal fibroblast miRNA sequencing**  
ID=MI0020363\_1;accession\_number=MI0020363;Name=hsa-mir-6086  
Total reads = 0



**C) PPB Case 14 tumor miRNA sequencing**  
ID=MI0020363\_1;accession\_number=MI0020363;Name=hsa-mir-6086  
Total reads = 0



**D) PPB Case 14 cell line miRNA sequencing**  
ID=MI0020363\_1;accession\_number=MI0020363;Name=hsa-mir-6086  
Total reads = 0



**B) Normal fibroblast miRNA sequencing**  
ID=MI0016904\_1;accession\_number=MI0016904;Name=hsa-mir-548am  
Total reads = 0



**C) PPB Case 14 tumor miRNA sequencing**  
ID=MI0016904\_1;accession\_number=MI0016904;Name=hsa-mir-548am  
Total reads = 0



**D) PPB Case 14 cell line miRNA sequencing**  
ID=MI0016904\_1;accession\_number=MI0016904;Name=hsa-mir-548am  
Total reads = 0



**B) Normal fibroblast miRNA sequencing**  
ID=MI0017409\_1;accession\_number=MI0017409;Name=hsa-mir-4768  
Total reads = 0



**C) PPB Case 14 tumor miRNA sequencing**  
ID=MI0017409\_1;accession\_number=MI0017409;Name=hsa-mir-4768  
Total reads = 0



**D) PPB Case 14 cell line miRNA sequencing**  
ID=MI0017409\_1;accession\_number=MI0017409;Name=hsa-mir-4768  
Total reads = 0



**B) Normal fibroblast miRNA sequencing**  
ID=MI0016010\_1;accession\_number=MI0016010;Name=hsa-mir-23c  
Total reads = 0



**C) PPB Case 14 tumor miRNA sequencing**  
ID=MI0016010\_1;accession\_number=MI0016010;Name=hsa-mir-23c  
Total reads = 0



**D) PPB Case 14 cell line miRNA sequencing**  
ID=MI0016010\_1;accession\_number=MI0016010;Name=hsa-mir-23c  
Total reads = 0



**B) Normal fibroblast miRNA sequencing**  
ID=MI0021279\_1;accession\_number=MI0021279;Name=hsa-mir-6134  
Total reads = 0



**C) PPB Case 14 tumor miRNA sequencing**  
ID=MI0021279\_1;accession\_number=MI0021279;Name=hsa-mir-6134  
Total reads = 0



**D) PPB Case 14 cell line miRNA sequencing**  
ID=MI0021279\_1;accession\_number=MI0021279;Name=hsa-mir-6134  
Total reads = 0



**B) Normal fibroblast miRNA sequencing**  
ID=MI0019299\_1;accession\_number=MI0019299;Name=hsa-mir-4666b  
Total reads = 0



**C) PPB Case 14 tumor miRNA sequencing**  
ID=MI0019299\_1;accession\_number=MI0019299;Name=hsa-mir-4666b  
Total reads = 0



**D) PPB Case 14 cell line miRNA sequencing**  
ID=MI0019299\_1;accession\_number=MI0019299;Name=hsa-mir-4666b  
Total reads = 0



**B) Normal fibroblast miRNA sequencing**  
ID=MI0016420\_1;accession\_number=MI0016420;Name=hsa-mir-3915  
Total reads = 0



**C) PPB Case 14 tumor miRNA sequencing**  
ID=MI0016420\_1;accession\_number=MI0016420;Name=hsa-mir-3915  
Total reads = 0



**D) PPB Case 14 cell line miRNA sequencing**  
ID=MI0016420\_1;accession\_number=MI0016420;Name=hsa-mir-3915  
Total reads = 0



**B) Normal fibroblast miRNA sequencing**  
ID=MI0006378\_1;accession\_number=MI0006378;Name=hsa-mir-548f-5  
Total reads = 0



**C) PPB Case 14 tumor miRNA sequencing**  
ID=MI0006378\_1;accession\_number=MI0006378;Name=hsa-mir-548f-5  
Total reads = 0



**D) PPB Case 14 cell line miRNA sequencing**  
ID=MI0006378\_1;accession\_number=MI0006378;Name=hsa-mir-548f-5  
Total reads = 0





**B) Normal fibroblast miRNA sequencing**  
ID=MI0016815\_1;accession\_number=MI0016815;Name=hsa-mir-548aj-2  
Total reads = 0



**C) PPB Case 14 tumor miRNA sequencing**  
ID=MI0016815\_1;accession\_number=MI0016815;Name=hsa-mir-548aj-2  
Total reads = 0



**D) PPB Case 14 cell line miRNA sequencing**  
ID=MI0016815\_1;accession\_number=MI0016815;Name=hsa-mir-548aj-2  
Total reads = 0



**B) Normal fibroblast miRNA sequencing**  
ID=MI0016593\_1;accession\_number=MI0016593;Name=hsa-mir-3937  
Total reads = 0



**C) PPB Case 14 tumor miRNA sequencing**  
ID=MI0016593\_1;accession\_number=MI0016593;Name=hsa-mir-3937  
Total reads = 0



**D) PPB Case 14 cell line miRNA sequencing**  
ID=MI0016593\_1;accession\_number=MI0016593;Name=hsa-mir-3937  
Total reads = 0



**B) Normal fibroblast miRNA sequencing**  
ID=MI0016905\_1;accession\_number=MI0016905;Name=hsa-mir-1587  
Total reads = 0



**C) PPB Case 14 tumor miRNA sequencing**  
ID=MI0016905\_1;accession\_number=MI0016905;Name=hsa-mir-1587  
Total reads = 0



**D) PPB Case 14 cell line miRNA sequencing**  
ID=MI0016905\_1;accession\_number=MI0016905;Name=hsa-mir-1587  
Total reads = 0



**B) Normal fibroblast miRNA sequencing**  
ID=MI0017410\_1;accession\_number=MI0017410;Name=hsa-mir-4769  
Total reads = 0



**C) PPB Case 14 tumor miRNA sequencing**  
ID=MI0017410\_1;accession\_number=MI0017410;Name=hsa-mir-4769  
Total reads = 0



**D) PPB Case 14 cell line miRNA sequencing**  
ID=MI0017410\_1;accession\_number=MI0017410;Name=hsa-mir-4769  
Total reads = 0



**B) Normal fibroblast miRNA sequencing**  
ID=MI0003205\_1;accession\_number=MI0003205;Name=hsa-mir-532  
Total reads = 0



**C) PPB Case 14 tumor miRNA sequencing**  
ID=MI0003205\_1;accession\_number=MI0003205;Name=hsa-mir-532  
Total reads = 1



**D) PPB Case 14 cell line miRNA sequencing**  
ID=MI0003205\_1;accession\_number=MI0003205;Name=hsa-mir-532  
Total reads = 0



**B) Normal fibroblast miRNA sequencing**  
ID=MI0015903\_1;accession\_number=MI0015903;Name=hsa-mir-500b  
Total reads = 0



**C) PPB Case 14 tumor miRNA sequencing**  
ID=MI0015903\_1;accession\_number=MI0015903;Name=hsa-mir-500b  
Total reads = 0



**D) PPB Case 14 cell line miRNA sequencing**  
ID=MI0015903\_1;accession\_number=MI0015903;Name=hsa-mir-500b  
Total reads = 0



**B) Normal fibroblast miRNA sequencing**  
ID=MI0016906\_1;accession\_number=MI0016906;Name=hsa-mir-4536-1  
Total reads = 0



**C) PPB Case 14 tumor miRNA sequencing**  
ID=MI0016906\_1;accession\_number=MI0016906;Name=hsa-mir-4536-1  
Total reads = 0



**D) PPB Case 14 cell line miRNA sequencing**  
ID=MI0016906\_1;accession\_number=MI0016906;Name=hsa-mir-4536-1  
Total reads = 0



**B) Normal fibroblast miRNA sequencing**  
ID=MI0019149\_1;accession\_number=MI0019149;Name=hsa-mir-4536-2  
Total reads = 0



**C) PPB Case 14 tumor miRNA sequencing**  
ID=MI0019149\_1;accession\_number=MI0019149;Name=hsa-mir-4536-2  
Total reads = 0



**D) PPB Case 14 cell line miRNA sequencing**  
ID=MI0019149\_1;accession\_number=MI0019149;Name=hsa-mir-4536-2  
Total reads = 0





**B) Normal fibroblast miRNA sequencing**  
ID=MI0003782\_1;accession\_number=MI0003782;Name=hsa-mir-1468  
Total reads = 0



**C) PPB Case 14 tumor miRNA sequencing**  
ID=MI0003782\_1;accession\_number=MI0003782;Name=hsa-mir-1468  
Total reads = 0



**D) PPB Case 14 cell line miRNA sequencing**  
ID=MI0003782\_1;accession\_number=MI0003782;Name=hsa-mir-1468  
Total reads = 0



**B) Normal fibroblast miRNA sequencing**  
ID=MI0000300\_1;accession\_number=MI0000300;Name=hsa-mir-223  
Total reads = 0



**C) PPB Case 14 tumor miRNA sequencing**  
ID=MI0000300\_1;accession\_number=MI0000300;Name=hsa-mir-223  
Total reads = 15

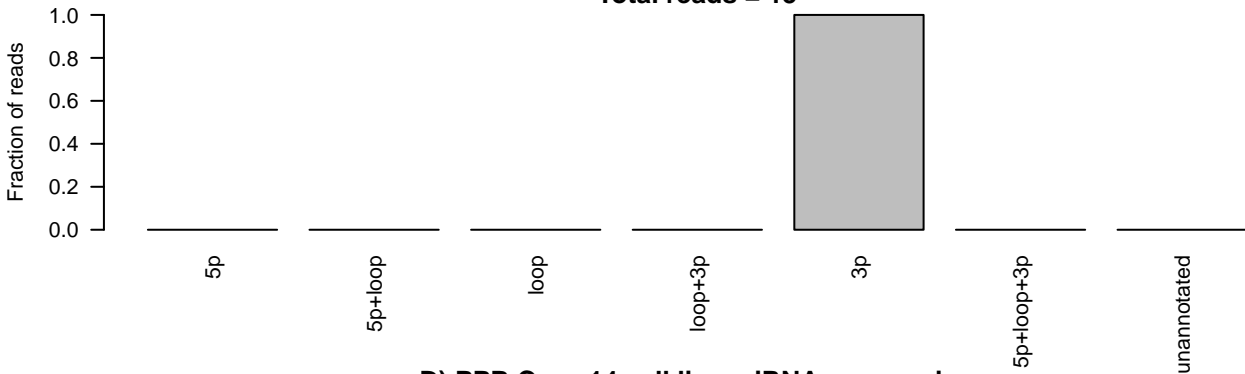

**D) PPB Case 14 cell line miRNA sequencing**  
ID=MI0000300\_1;accession\_number=MI0000300;Name=hsa-mir-223  
Total reads = 0



**B) Normal fibroblast miRNA sequencing**  
ID=MI0016436\_1;accession\_number=MI0016436;Name=hsa-mir-676  
Total reads = 0



**C) PPB Case 14 tumor miRNA sequencing**  
ID=MI0016436\_1;accession\_number=MI0016436;Name=hsa-mir-676  
Total reads = 0



**D) PPB Case 14 cell line miRNA sequencing**  
ID=MI0016436\_1;accession\_number=MI0016436;Name=hsa-mir-676  
Total reads = 0



**B) Normal fibroblast miRNA sequencing**  
ID=MI0003685\_1;accession\_number=MI0003685;Name=hsa-mir-421  
Total reads = 0



**C) PPB Case 14 tumor miRNA sequencing**  
ID=MI0003685\_1;accession\_number=MI0003685;Name=hsa-mir-421  
Total reads = 0



**D) PPB Case 14 cell line miRNA sequencing**  
ID=MI0003685\_1;accession\_number=MI0003685;Name=hsa-mir-421  
Total reads = 0



**B) Normal fibroblast miRNA sequencing**  
ID=MI0003516\_1;accession\_number=MI0003516;Name=hsa-mir-545  
Total reads = 0



**C) PPB Case 14 tumor miRNA sequencing**  
ID=MI0003516\_1;accession\_number=MI0003516;Name=hsa-mir-545  
Total reads = 1

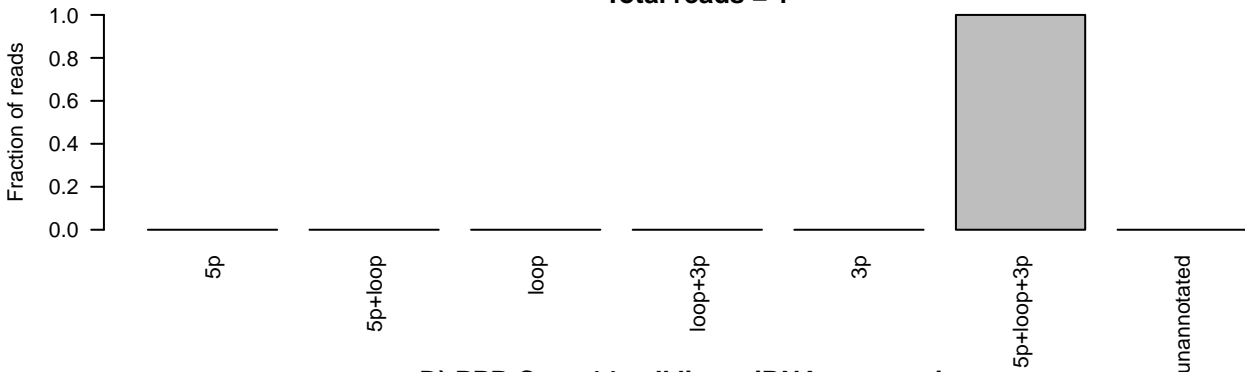

**D) PPB Case 14 cell line miRNA sequencing**  
ID=MI0003516\_1;accession\_number=MI0003516;Name=hsa-mir-545  
Total reads = 4

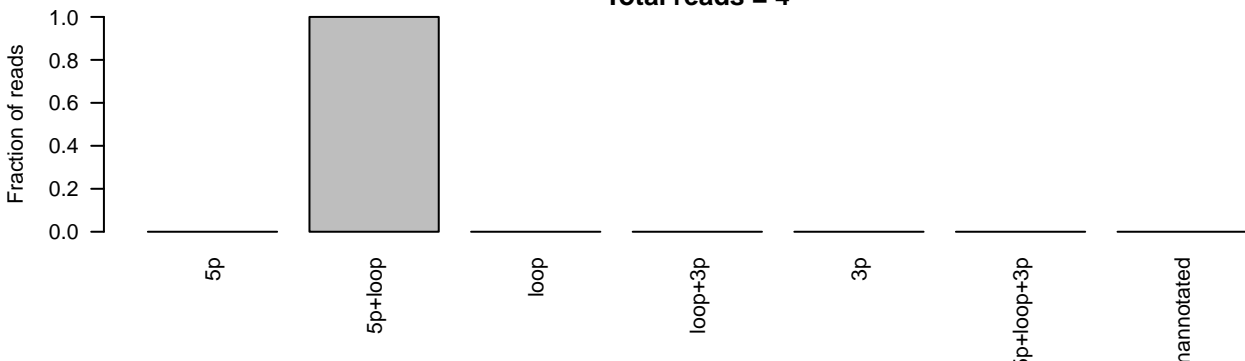

**B) Normal fibroblast miRNA sequencing**  
ID=MI0001145\_1;accession\_number=MI0001145;Name=hsa-mir-384  
Total reads = 0



**C) PPB Case 14 tumor miRNA sequencing**  
ID=MI0001145\_1;accession\_number=MI0001145;Name=hsa-mir-384  
Total reads = 0



**D) PPB Case 14 cell line miRNA sequencing**  
ID=MI0001145\_1;accession\_number=MI0001145;Name=hsa-mir-384  
Total reads = 0



**B) Normal fibroblast miRNA sequencing**  
ID=MI0000824\_1;accession\_number=MI0000824;Name=hsa-mir-325  
Total reads = 0



**C) PPB Case 14 tumor miRNA sequencing**  
ID=MI0000824\_1;accession\_number=MI0000824;Name=hsa-mir-325  
Total reads = 0



**D) PPB Case 14 cell line miRNA sequencing**  
ID=MI0000824\_1;accession\_number=MI0000824;Name=hsa-mir-325  
Total reads = 0



**B) Normal fibroblast miRNA sequencing**  
ID=MI0015904\_1;accession\_number=MI0015904;Name=hsa-mir-4328  
Total reads = 0



**C) PPB Case 14 tumor miRNA sequencing**  
ID=MI0015904\_1;accession\_number=MI0015904;Name=hsa-mir-4328  
Total reads = 0



**D) PPB Case 14 cell line miRNA sequencing**  
ID=MI0015904\_1;accession\_number=MI0015904;Name=hsa-mir-4328  
Total reads = 0





**B) Normal fibroblast miRNA sequencing**  
ID=MI0006424\_1;accession\_number=MI0006424;Name=hsa-mir-548i-4  
Total reads = 0



**C) PPB Case 14 tumor miRNA sequencing**  
ID=MI0006424\_1;accession\_number=MI0006424;Name=hsa-mir-548i-4  
Total reads = 0



**D) PPB Case 14 cell line miRNA sequencing**  
ID=MI0006424\_1;accession\_number=MI0006424;Name=hsa-mir-548i-4  
Total reads = 0



**B) Normal fibroblast miRNA sequencing**  
ID=MI0006652\_1;accession\_number=MI0006652;Name=hsa-mir-1321  
Total reads = 0



**C) PPB Case 14 tumor miRNA sequencing**  
ID=MI0006652\_1;accession\_number=MI0006652;Name=hsa-mir-1321  
Total reads = 0



**D) PPB Case 14 cell line miRNA sequencing**  
ID=MI0006652\_1;accession\_number=MI0006652;Name=hsa-mir-1321  
Total reads = 0



**B) Normal fibroblast miRNA sequencing**  
ID=MI0006400\_1;accession\_number=MI0006400;Name=hsa-mir-548m  
Total reads = 0



**C) PPB Case 14 tumor miRNA sequencing**  
ID=MI0006400\_1;accession\_number=MI0006400;Name=hsa-mir-548m  
Total reads = 0



**D) PPB Case 14 cell line miRNA sequencing**  
ID=MI0006400\_1;accession\_number=MI0006400;Name=hsa-mir-548m  
Total reads = 0



**B) Normal fibroblast miRNA sequencing**  
ID=MI0016907\_1;accession\_number=MI0016907;Name=hsa-mir-548an  
Total reads = 0



**C) PPB Case 14 tumor miRNA sequencing**  
ID=MI0016907\_1;accession\_number=MI0016907;Name=hsa-mir-548an  
Total reads = 0



**D) PPB Case 14 cell line miRNA sequencing**  
ID=MI0016907\_1;accession\_number=MI0016907;Name=hsa-mir-548an  
Total reads = 0



**B) Normal fibroblast miRNA sequencing**  
ID=MI0016996\_1;accession\_number=MI0016996;Name=hsa-mir-3978  
Total reads = 0



**C) PPB Case 14 tumor miRNA sequencing**  
ID=MI0016996\_1;accession\_number=MI0016996;Name=hsa-mir-3978  
Total reads = 0



**D) PPB Case 14 cell line miRNA sequencing**  
ID=MI0016996\_1;accession\_number=MI0016996;Name=hsa-mir-3978  
Total reads = 0



**B) Normal fibroblast miRNA sequencing**  
ID=MI0015901\_1;accession\_number=MI0015901;Name=hsa-mir-4329  
Total reads = 0



**C) PPB Case 14 tumor miRNA sequencing**  
ID=MI0015901\_1;accession\_number=MI0015901;Name=hsa-mir-4329  
Total reads = 0



**D) PPB Case 14 cell line miRNA sequencing**  
ID=MI0015901\_1;accession\_number=MI0015901;Name=hsa-mir-4329  
Total reads = 0



**B) Normal fibroblast miRNA sequencing**  
ID=MI0003944\_1;accession\_number=MI0003944;Name=hsa-mir-764  
Total reads = 0



**C) PPB Case 14 tumor miRNA sequencing**  
ID=MI0003944\_1;accession\_number=MI0003944;Name=hsa-mir-764  
Total reads = 0



**D) PPB Case 14 cell line miRNA sequencing**  
ID=MI0003944\_1;accession\_number=MI0003944;Name=hsa-mir-764  
Total reads = 0



**B) Normal fibroblast miRNA sequencing**  
ID=MI0008333\_1;accession\_number=MI0008333;Name=hsa-mir-1912  
Total reads = 0



**C) PPB Case 14 tumor miRNA sequencing**  
ID=MI0008333\_1;accession\_number=MI0008333;Name=hsa-mir-1912  
Total reads = 0



**D) PPB Case 14 cell line miRNA sequencing**  
ID=MI0008333\_1;accession\_number=MI0008333;Name=hsa-mir-1912  
Total reads = 0





**B) Normal fibroblast miRNA sequencing**  
ID=MI0003758\_1;accession\_number=MI0003758;Name=hsa-mir-1264  
Total reads = 0



**C) PPB Case 14 tumor miRNA sequencing**  
ID=MI0003758\_1;accession\_number=MI0003758;Name=hsa-mir-1264  
Total reads = 0



**D) PPB Case 14 cell line miRNA sequencing**  
ID=MI0003758\_1;accession\_number=MI0003758;Name=hsa-mir-1264  
Total reads = 0



**B) Normal fibroblast miRNA sequencing**  
ID=MI0003938\_1;accession\_number=MI0003938;Name=hsa-mir-1298  
Total reads = 0



**C) PPB Case 14 tumor miRNA sequencing**  
ID=MI0003938\_1;accession\_number=MI0003938;Name=hsa-mir-1298  
Total reads = 0



**D) PPB Case 14 cell line miRNA sequencing**  
ID=MI0003938\_1;accession\_number=MI0003938;Name=hsa-mir-1298  
Total reads = 0



**B) Normal fibroblast miRNA sequencing**  
ID=MI0008332\_1;accession\_number=MI0008332;Name=hsa-mir-1911  
Total reads = 0



**C) PPB Case 14 tumor miRNA sequencing**  
ID=MI0008332\_1;accession\_number=MI0008332;Name=hsa-mir-1911  
Total reads = 0



**D) PPB Case 14 cell line miRNA sequencing**  
ID=MI0008332\_1;accession\_number=MI0008332;Name=hsa-mir-1911  
Total reads = 0



**B) Normal fibroblast miRNA sequencing**  
ID=MI0001637\_1;accession\_number=MI0001637;Name=hsa-mir-448  
Total reads = 0



**C) PPB Case 14 tumor miRNA sequencing**  
ID=MI0001637\_1;accession\_number=MI0001637;Name=hsa-mir-448  
Total reads = 0



**D) PPB Case 14 cell line miRNA sequencing**  
ID=MI0001637\_1;accession\_number=MI0001637;Name=hsa-mir-448  
Total reads = 0



**B) Normal fibroblast miRNA sequencing**  
ID=MI0006419\_1;accession\_number=MI0006419;Name=hsa-mir-1277  
Total reads = 0



**C) PPB Case 14 tumor miRNA sequencing**  
ID=MI0006419\_1;accession\_number=MI0006419;Name=hsa-mir-1277  
Total reads = 0



**D) PPB Case 14 cell line miRNA sequencing**  
ID=MI0006419\_1;accession\_number=MI0006419;Name=hsa-mir-1277  
Total reads = 0



**B) Normal fibroblast miRNA sequencing**  
ID=MI0003836\_1;accession\_number=MI0003836;Name=hsa-mir-766  
Total reads = 0



**C) PPB Case 14 tumor miRNA sequencing**  
ID=MI0003836\_1;accession\_number=MI0003836;Name=hsa-mir-766  
Total reads = 58

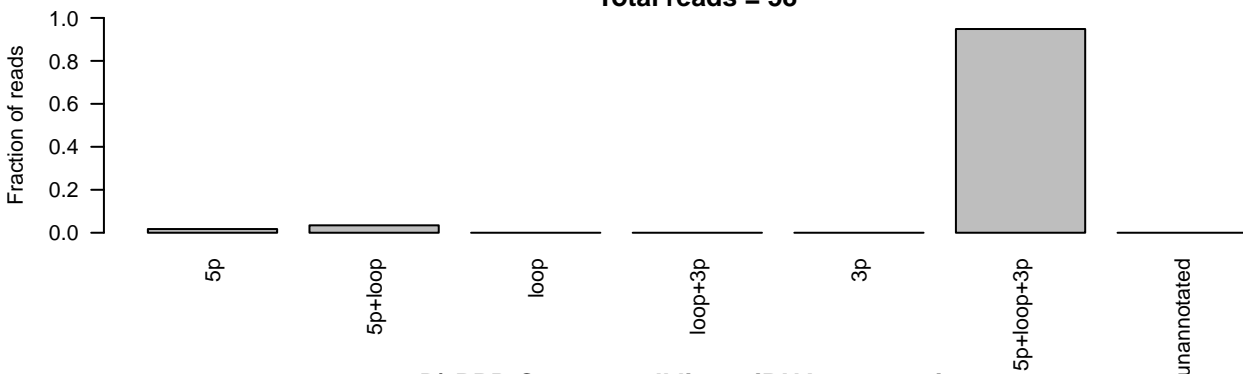

**D) PPB Case 14 cell line miRNA sequencing**  
ID=MI0003836\_1;accession\_number=MI0003836;Name=hsa-mir-766  
Total reads = 1



**B) Normal fibroblast miRNA sequencing**  
ID=MI0016073\_1;accession\_number=MI0016073;Name=hsa-mir-3672  
Total reads = 0



**C) PPB Case 14 tumor miRNA sequencing**  
ID=MI0016073\_1;accession\_number=MI0016073;Name=hsa-mir-3672  
Total reads = 0



**D) PPB Case 14 cell line miRNA sequencing**  
ID=MI0016073\_1;accession\_number=MI0016073;Name=hsa-mir-3672  
Total reads = 0



**B) Normal fibroblast miRNA sequencing**  
ID=MI0000764\_1;accession\_number=MI0000764;Name=hsa-mir-363  
Total reads = 0



**C) PPB Case 14 tumor miRNA sequencing**  
ID=MI0000764\_1;accession\_number=MI0000764;Name=hsa-mir-363  
Total reads = 2



**D) PPB Case 14 cell line miRNA sequencing**  
ID=MI0000764\_1;accession\_number=MI0000764;Name=hsa-mir-363  
Total reads = 0





**B) Normal fibroblast miRNA sequencing**  
ID=MI0000094\_1;accession\_number=MI0000094;Name=hsa-mir-92a-2  
Total reads = 0



**C) PPB Case 14 tumor miRNA sequencing**  
ID=MI0000094\_1;accession\_number=MI0000094;Name=hsa-mir-92a-2  
Total reads = 1

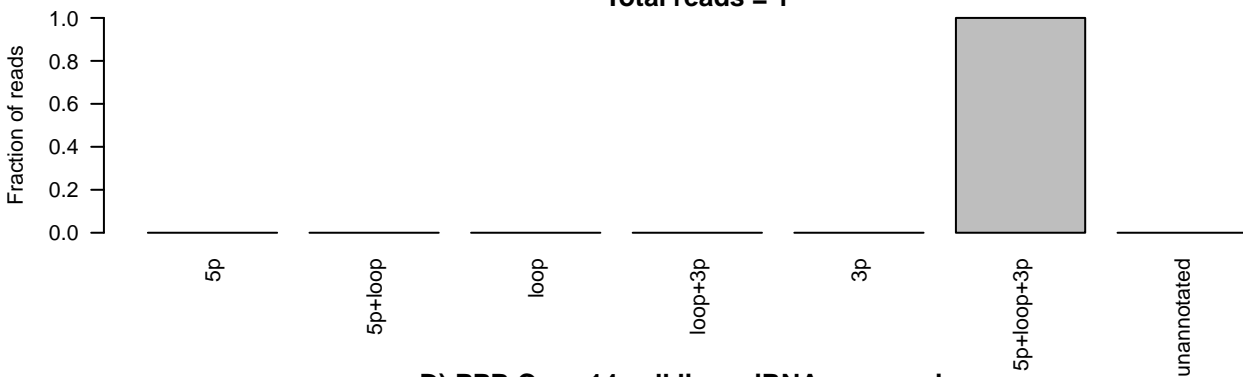

**D) PPB Case 14 cell line miRNA sequencing**  
ID=MI0000094\_1;accession\_number=MI0000094;Name=hsa-mir-92a-2  
Total reads = 0



**B) Normal fibroblast miRNA sequencing**  
ID=MI0001519\_1;accession\_number=MI0001519;Name=hsa-mir-20b  
Total reads = 0



**C) PPB Case 14 tumor miRNA sequencing**  
ID=MI0001519\_1;accession\_number=MI0001519;Name=hsa-mir-20b  
Total reads = 1



**D) PPB Case 14 cell line miRNA sequencing**  
ID=MI0001519\_1;accession\_number=MI0001519;Name=hsa-mir-20b  
Total reads = 0



**B) Normal fibroblast miRNA sequencing**  
ID=MI0005531\_1;accession\_number=MI0005531;Name=hsa-mir-450b  
Total reads = 0

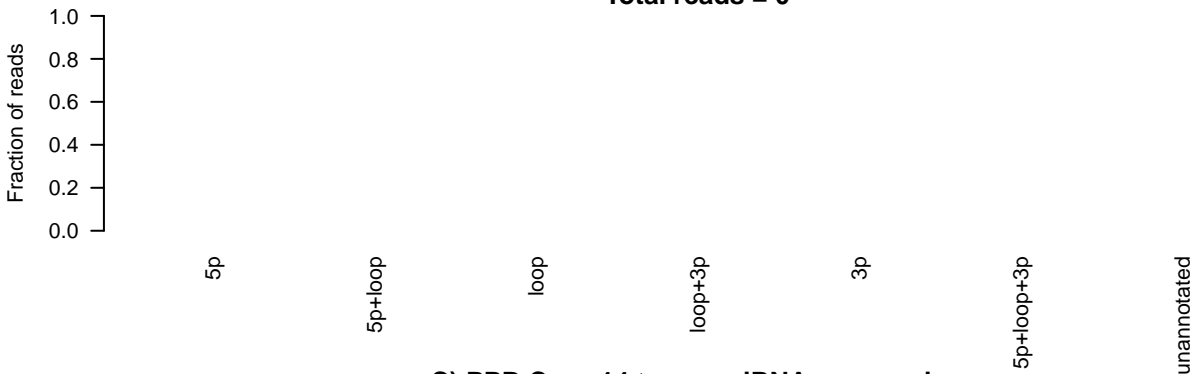

**C) PPB Case 14 tumor miRNA sequencing**  
ID=MI0005531\_1;accession\_number=MI0005531;Name=hsa-mir-450b  
Total reads = 1



**D) PPB Case 14 cell line miRNA sequencing**  
ID=MI0005531\_1;accession\_number=MI0005531;Name=hsa-mir-450b  
Total reads = 0



**B) Normal fibroblast miRNA sequencing**  
ID=MI0001652\_1;accession\_number=MI0001652;Name=hsa-mir-450a-1  
Total reads = 0



**C) PPB Case 14 tumor miRNA sequencing**  
ID=MI0001652\_1;accession\_number=MI0001652;Name=hsa-mir-450a-1  
Total reads = 4

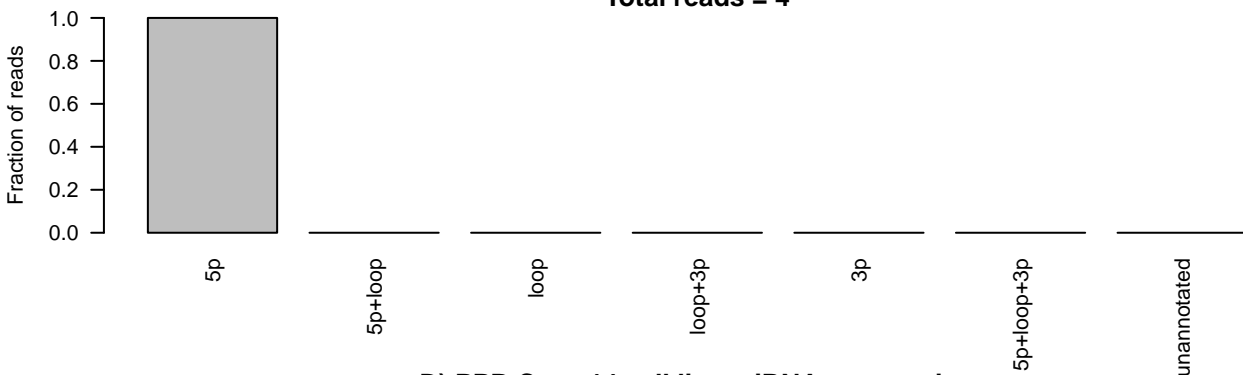

**D) PPB Case 14 cell line miRNA sequencing**  
ID=MI0001652\_1;accession\_number=MI0001652;Name=hsa-mir-450a-1  
Total reads = 1



**B) Normal fibroblast miRNA sequencing**  
ID=MI0003187\_1;accession\_number=MI0003187;Name=hsa-mir-450a-2  
Total reads = 0



**C) PPB Case 14 tumor miRNA sequencing**  
ID=MI0003187\_1;accession\_number=MI0003187;Name=hsa-mir-450a-2  
Total reads = 2

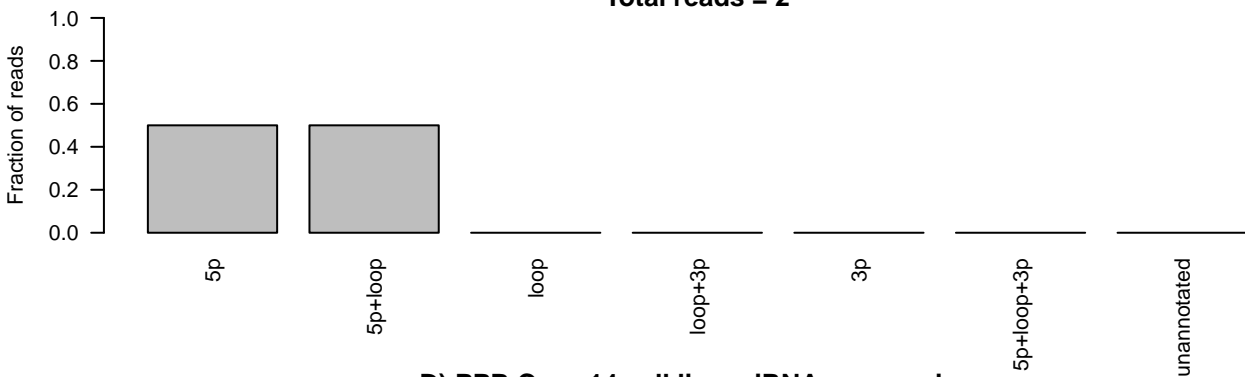

**D) PPB Case 14 cell line miRNA sequencing**  
ID=MI0003187\_1;accession\_number=MI0003187;Name=hsa-mir-450a-2  
Total reads = 1

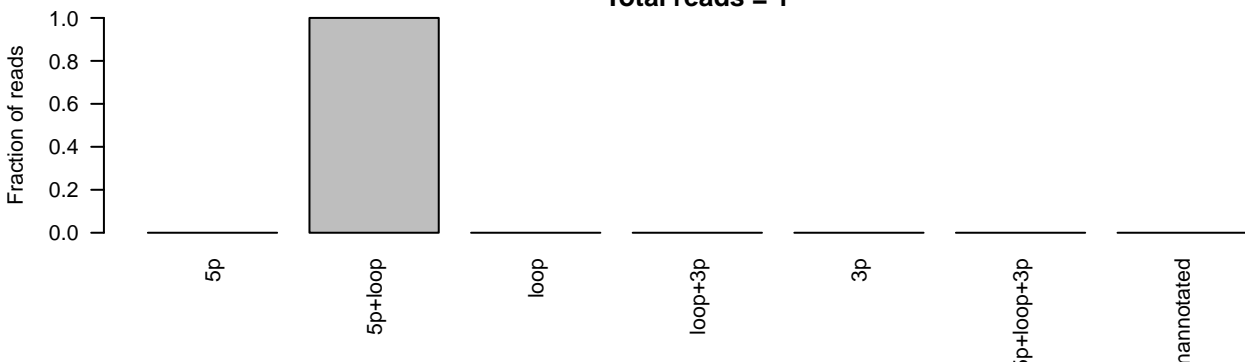

**B) Normal fibroblast miRNA sequencing**  
ID=MI0005756\_1;accession\_number=MI0005756;Name=hsa-mir-934  
Total reads = 0



**C) PPB Case 14 tumor miRNA sequencing**  
ID=MI0005756\_1;accession\_number=MI0005756;Name=hsa-mir-934  
Total reads = 0



**D) PPB Case 14 cell line miRNA sequencing**  
ID=MI0005756\_1;accession\_number=MI0005756;Name=hsa-mir-934  
Total reads = 0



**B) Normal fibroblast miRNA sequencing**  
ID=MI0003189\_1;accession\_number=MI0003189;Name=hsa-mir-504  
Total reads = 0



**C) PPB Case 14 tumor miRNA sequencing**  
ID=MI0003189\_1;accession\_number=MI0003189;Name=hsa-mir-504  
Total reads = 0



**D) PPB Case 14 cell line miRNA sequencing**  
ID=MI0003189\_1;accession\_number=MI0003189;Name=hsa-mir-504  
Total reads = 0



**B) Normal fibroblast miRNA sequencing**  
ID=MI0008192\_1;accession\_number=MI0008192;Name=hsa-mir-320d-2  
Total reads = 0



**C) PPB Case 14 tumor miRNA sequencing**  
ID=MI0008192\_1;accession\_number=MI0008192;Name=hsa-mir-320d-2  
Total reads = 0



**D) PPB Case 14 cell line miRNA sequencing**  
ID=MI0008192\_1;accession\_number=MI0008192;Name=hsa-mir-320d-2  
Total reads = 1





**B) Normal fibroblast miRNA sequencing**  
ID=MI0022560\_1;accession\_number=MI0022560;Name=hsa-mir-892c  
Total reads = 0



**C) PPB Case 14 tumor miRNA sequencing**  
ID=MI0022560\_1;accession\_number=MI0022560;Name=hsa-mir-892c  
Total reads = 0



**D) PPB Case 14 cell line miRNA sequencing**  
ID=MI0022560\_1;accession\_number=MI0022560;Name=hsa-mir-892c  
Total reads = 0



**B) Normal fibroblast miRNA sequencing**  
ID=MI0005533\_1;accession\_number=MI0005533;Name=hsa-mir-890  
Total reads = 0



**C) PPB Case 14 tumor miRNA sequencing**  
ID=MI0005533\_1;accession\_number=MI0005533;Name=hsa-mir-890  
Total reads = 0



**D) PPB Case 14 cell line miRNA sequencing**  
ID=MI0005533\_1;accession\_number=MI0005533;Name=hsa-mir-890  
Total reads = 0



**B) Normal fibroblast miRNA sequencing**  
ID=MI0005537\_1;accession\_number=MI0005537;Name=hsa-mir-888  
Total reads = 0



**C) PPB Case 14 tumor miRNA sequencing**  
ID=MI0005537\_1;accession\_number=MI0005537;Name=hsa-mir-888  
Total reads = 0



**D) PPB Case 14 cell line miRNA sequencing**  
ID=MI0005537\_1;accession\_number=MI0005537;Name=hsa-mir-888  
Total reads = 0



**B) Normal fibroblast miRNA sequencing**  
ID=MI0005528\_1;accession\_number=MI0005528;Name=hsa-mir-892a  
Total reads = 0



**C) PPB Case 14 tumor miRNA sequencing**  
ID=MI0005528\_1;accession\_number=MI0005528;Name=hsa-mir-892a  
Total reads = 0



**D) PPB Case 14 cell line miRNA sequencing**  
ID=MI0005528\_1;accession\_number=MI0005528;Name=hsa-mir-892a  
Total reads = 0



**B) Normal fibroblast miRNA sequencing**  
ID=MI0005538\_1;accession\_number=MI0005538;Name=hsa-mir-892b  
Total reads = 0



**C) PPB Case 14 tumor miRNA sequencing**  
ID=MI0005538\_1;accession\_number=MI0005538;Name=hsa-mir-892b  
Total reads = 0



**D) PPB Case 14 cell line miRNA sequencing**  
ID=MI0005538\_1;accession\_number=MI0005538;Name=hsa-mir-892b  
Total reads = 0



**B) Normal fibroblast miRNA sequencing**  
ID=MI0005534\_1;accession\_number=MI0005534;Name=hsa-mir-891b  
Total reads = 0



**C) PPB Case 14 tumor miRNA sequencing**  
ID=MI0005534\_1;accession\_number=MI0005534;Name=hsa-mir-891b  
Total reads = 0



**D) PPB Case 14 cell line miRNA sequencing**  
ID=MI0005534\_1;accession\_number=MI0005534;Name=hsa-mir-891b  
Total reads = 0



**B) Normal fibroblast miRNA sequencing**  
ID=MI0005524\_1;accession\_number=MI0005524;Name=hsa-mir-891a  
Total reads = 0



**C) PPB Case 14 tumor miRNA sequencing**  
ID=MI0005524\_1;accession\_number=MI0005524;Name=hsa-mir-891a  
Total reads = 0



**D) PPB Case 14 cell line miRNA sequencing**  
ID=MI0005524\_1;accession\_number=MI0005524;Name=hsa-mir-891a  
Total reads = 0



**B) Normal fibroblast miRNA sequencing**  
ID=MI0006649\_1;accession\_number=MI0006649;Name=hsa-mir-513c  
Total reads = 0



**C) PPB Case 14 tumor miRNA sequencing**  
ID=MI0006649\_1;accession\_number=MI0006649;Name=hsa-mir-513c  
Total reads = 0



**D) PPB Case 14 cell line miRNA sequencing**  
ID=MI0006649\_1;accession\_number=MI0006649;Name=hsa-mir-513c  
Total reads = 0





**B) Normal fibroblast miRNA sequencing**  
ID=MI0006648\_1;accession\_number=MI0006648;Name=hsa-mir-513b  
Total reads = 0



**C) PPB Case 14 tumor miRNA sequencing**  
ID=MI0006648\_1;accession\_number=MI0006648;Name=hsa-mir-513b  
Total reads = 0

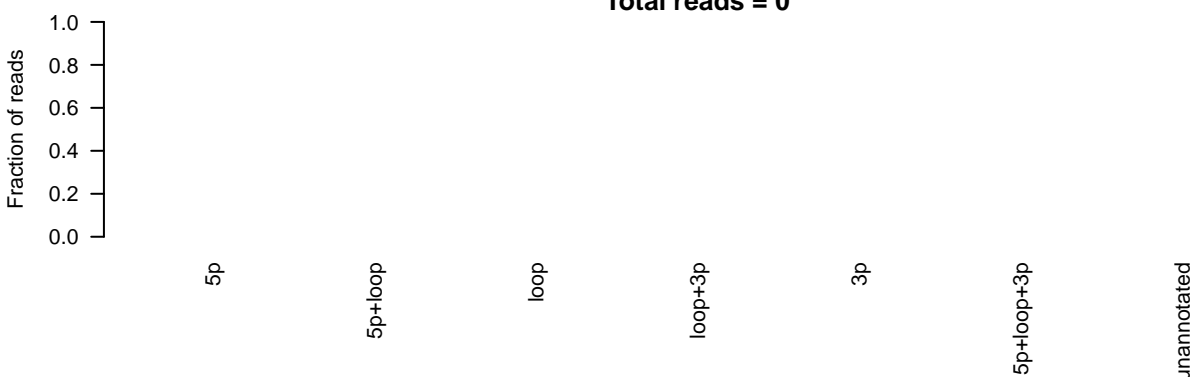

**D) PPB Case 14 cell line miRNA sequencing**  
ID=MI0006648\_1;accession\_number=MI0006648;Name=hsa-mir-513b  
Total reads = 0

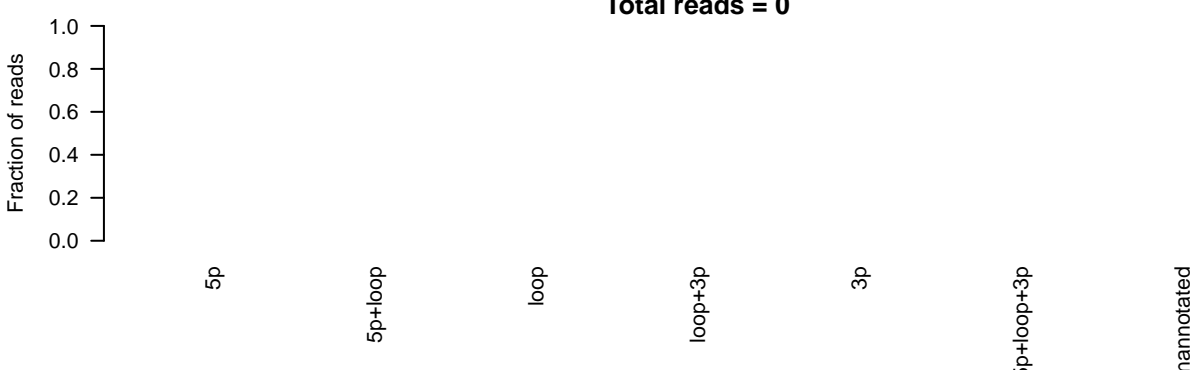

**B) Normal fibroblast miRNA sequencing**  
ID=MI0003191\_1;accession\_number=MI0003191;Name=hsa-mir-513a-1  
Total reads = 0



**C) PPB Case 14 tumor miRNA sequencing**  
ID=MI0003191\_1;accession\_number=MI0003191;Name=hsa-mir-513a-1  
Total reads = 0



**D) PPB Case 14 cell line miRNA sequencing**  
ID=MI0003191\_1;accession\_number=MI0003191;Name=hsa-mir-513a-1  
Total reads = 0



**B) Normal fibroblast miRNA sequencing**  
ID=MI0003192\_1;accession\_number=MI0003192;Name=hsa-mir-513a-2  
Total reads = 0



**C) PPB Case 14 tumor miRNA sequencing**  
ID=MI0003192\_1;accession\_number=MI0003192;Name=hsa-mir-513a-2  
Total reads = 0



**D) PPB Case 14 cell line miRNA sequencing**  
ID=MI0003192\_1;accession\_number=MI0003192;Name=hsa-mir-513a-2  
Total reads = 0



**B) Normal fibroblast miRNA sequencing**  
ID=MI0003193\_1;accession\_number=MI0003193;Name=hsa-mir-506  
Total reads = 0



**C) PPB Case 14 tumor miRNA sequencing**  
ID=MI0003193\_1;accession\_number=MI0003193;Name=hsa-mir-506  
Total reads = 0



**D) PPB Case 14 cell line miRNA sequencing**  
ID=MI0003193\_1;accession\_number=MI0003193;Name=hsa-mir-506  
Total reads = 0



**B) Normal fibroblast miRNA sequencing**  
ID=MI0003194\_1;accession\_number=MI0003194;Name=hsa-mir-507  
Total reads = 0



**C) PPB Case 14 tumor miRNA sequencing**  
ID=MI0003194\_1;accession\_number=MI0003194;Name=hsa-mir-507  
Total reads = 0



**D) PPB Case 14 cell line miRNA sequencing**  
ID=MI0003194\_1;accession\_number=MI0003194;Name=hsa-mir-507  
Total reads = 0



**B) Normal fibroblast miRNA sequencing**  
ID=MI0003195\_1;accession\_number=MI0003195;Name=hsa-mir-508  
Total reads = 0



**C) PPB Case 14 tumor miRNA sequencing**  
ID=MI0003195\_1;accession\_number=MI0003195;Name=hsa-mir-508  
Total reads = 1



**D) PPB Case 14 cell line miRNA sequencing**  
ID=MI0003195\_1;accession\_number=MI0003195;Name=hsa-mir-508  
Total reads = 0



**B) Normal fibroblast miRNA sequencing**  
ID=MI0014251\_1;accession\_number=MI0014251;Name=hsa-mir-514b  
Total reads = 0



**C) PPB Case 14 tumor miRNA sequencing**  
ID=MI0014251\_1;accession\_number=MI0014251;Name=hsa-mir-514b  
Total reads = 0



**D) PPB Case 14 cell line miRNA sequencing**  
ID=MI0014251\_1;accession\_number=MI0014251;Name=hsa-mir-514b  
Total reads = 0



**B) Normal fibroblast miRNA sequencing**  
ID=MI0005530\_1;accession\_number=MI0005530;Name=hsa-mir-509-2  
Total reads = 0



**C) PPB Case 14 tumor miRNA sequencing**  
ID=MI0005530\_1;accession\_number=MI0005530;Name=hsa-mir-509-2  
Total reads = 0



**D) PPB Case 14 cell line miRNA sequencing**  
ID=MI0005530\_1;accession\_number=MI0005530;Name=hsa-mir-509-2  
Total reads = 0





**B) Normal fibroblast miRNA sequencing**  
ID=MI0005717\_1;accession\_number=MI0005717;Name=hsa-mir-509-3  
Total reads = 0



**C) PPB Case 14 tumor miRNA sequencing**  
ID=MI0005717\_1;accession\_number=MI0005717;Name=hsa-mir-509-3  
Total reads = 0



**D) PPB Case 14 cell line miRNA sequencing**  
ID=MI0005717\_1;accession\_number=MI0005717;Name=hsa-mir-509-3  
Total reads = 0



**B) Normal fibroblast miRNA sequencing**  
ID=MI0003196\_1;accession\_number=MI0003196;Name=hsa-mir-509-1  
Total reads = 0



**C) PPB Case 14 tumor miRNA sequencing**  
ID=MI0003196\_1;accession\_number=MI0003196;Name=hsa-mir-509-1  
Total reads = 0



**D) PPB Case 14 cell line miRNA sequencing**  
ID=MI0003196\_1;accession\_number=MI0003196;Name=hsa-mir-509-1  
Total reads = 0



**B) Normal fibroblast miRNA sequencing**  
ID=MI0003197\_1;accession\_number=MI0003197;Name=hsa-mir-510  
Total reads = 0



**C) PPB Case 14 tumor miRNA sequencing**  
ID=MI0003197\_1;accession\_number=MI0003197;Name=hsa-mir-510  
Total reads = 0



**D) PPB Case 14 cell line miRNA sequencing**  
ID=MI0003197\_1;accession\_number=MI0003197;Name=hsa-mir-510  
Total reads = 0



**B) Normal fibroblast miRNA sequencing**  
ID=MI0003198\_1;accession\_number=MI0003198;Name=hsa-mir-514a-1  
Total reads = 0

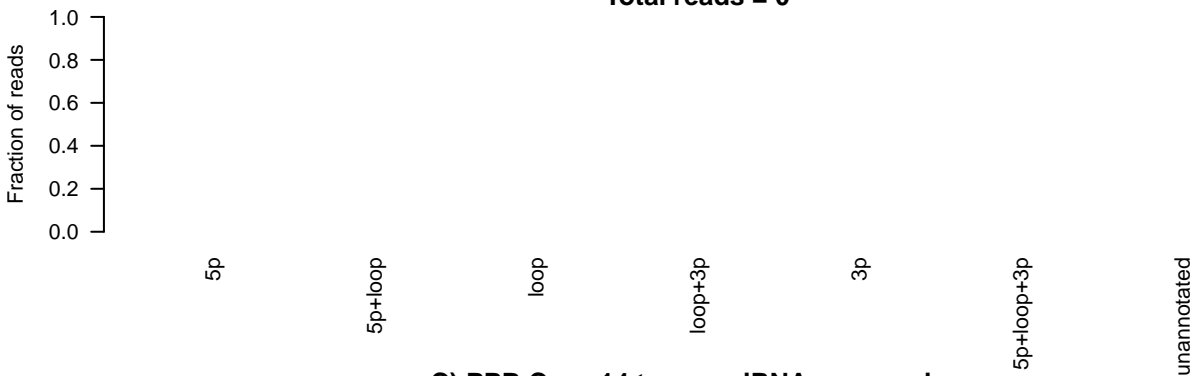

**C) PPB Case 14 tumor miRNA sequencing**  
ID=MI0003198\_1;accession\_number=MI0003198;Name=hsa-mir-514a-1  
Total reads = 1



**D) PPB Case 14 cell line miRNA sequencing**  
ID=MI0003198\_1;accession\_number=MI0003198;Name=hsa-mir-514a-1  
Total reads = 0



**B) Normal fibroblast miRNA sequencing**  
ID=MI0003199\_1;accession\_number=MI0003199;Name=hsa-mir-514a-2  
Total reads = 0



**C) PPB Case 14 tumor miRNA sequencing**  
ID=MI0003199\_1;accession\_number=MI0003199;Name=hsa-mir-514a-2  
Total reads = 1

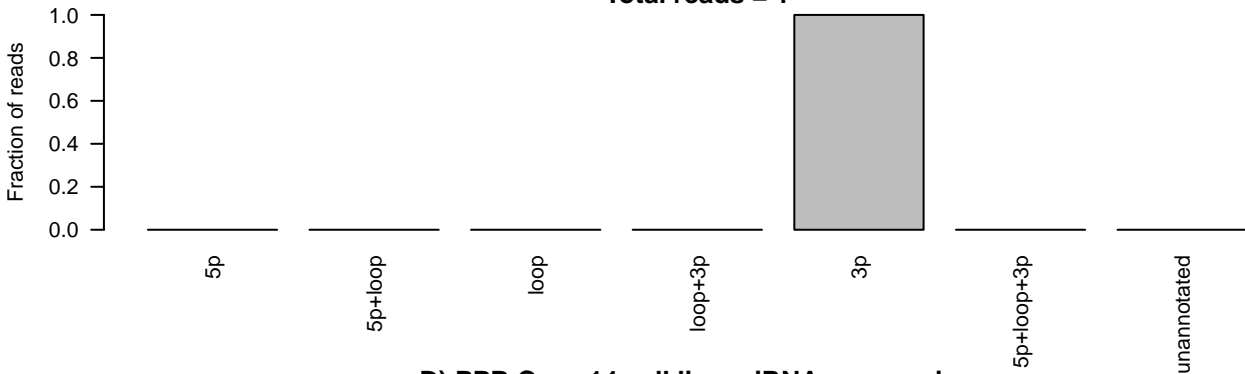

**D) PPB Case 14 cell line miRNA sequencing**  
ID=MI0003199\_1;accession\_number=MI0003199;Name=hsa-mir-514a-2  
Total reads = 0



**B) Normal fibroblast miRNA sequencing**  
ID=MI0003200\_1;accession\_number=MI0003200;Name=hsa-mir-514a-3  
Total reads = 0



**C) PPB Case 14 tumor miRNA sequencing**  
ID=MI0003200\_1;accession\_number=MI0003200;Name=hsa-mir-514a-3  
Total reads = 0



**D) PPB Case 14 cell line miRNA sequencing**  
ID=MI0003200\_1;accession\_number=MI0003200;Name=hsa-mir-514a-3  
Total reads = 0



**B) Normal fibroblast miRNA sequencing**  
ID=MI0010633\_1;accession\_number=MI0010633;Name=hsa-mir-2114  
Total reads = 0



**C) PPB Case 14 tumor miRNA sequencing**  
ID=MI0010633\_1;accession\_number=MI0010633;Name=hsa-mir-2114  
Total reads = 0



**D) PPB Case 14 cell line miRNA sequencing**  
ID=MI0010633\_1;accession\_number=MI0010633;Name=hsa-mir-2114  
Total reads = 0



**B) Normal fibroblast miRNA sequencing**  
ID=MI0015902\_1;accession\_number=MI0015902;Name=hsa-mir-4330  
Total reads = 0



**C) PPB Case 14 tumor miRNA sequencing**  
ID=MI0015902\_1;accession\_number=MI0015902;Name=hsa-mir-4330  
Total reads = 0



**D) PPB Case 14 cell line miRNA sequencing**  
ID=MI0015902\_1;accession\_number=MI0015902;Name=hsa-mir-4330  
Total reads = 0





**B) Normal fibroblast miRNA sequencing**  
ID=MI0000111\_1;accession\_number=MI0000111;Name=hsa-mir-105-1  
Total reads = 0



**C) PPB Case 14 tumor miRNA sequencing**  
ID=MI0000111\_1;accession\_number=MI0000111;Name=hsa-mir-105-1  
Total reads = 0



**D) PPB Case 14 cell line miRNA sequencing**  
ID=MI0000111\_1;accession\_number=MI0000111;Name=hsa-mir-105-1  
Total reads = 0



**B) Normal fibroblast miRNA sequencing**  
ID=MI0003763\_1;accession\_number=MI0003763;Name=hsa-mir-767  
Total reads = 0



**C) PPB Case 14 tumor miRNA sequencing**  
ID=MI0003763\_1;accession\_number=MI0003763;Name=hsa-mir-767  
Total reads = 0



**D) PPB Case 14 cell line miRNA sequencing**  
ID=MI0003763\_1;accession\_number=MI0003763;Name=hsa-mir-767  
Total reads = 0



**B) Normal fibroblast miRNA sequencing**  
ID=MI0000112\_1;accession\_number=MI0000112;Name=hsa-mir-105-2  
Total reads = 0



**C) PPB Case 14 tumor miRNA sequencing**  
ID=MI0000112\_1;accession\_number=MI0000112;Name=hsa-mir-105-2  
Total reads = 0



**D) PPB Case 14 cell line miRNA sequencing**  
ID=MI0000112\_1;accession\_number=MI0000112;Name=hsa-mir-105-2  
Total reads = 0



**B) Normal fibroblast miRNA sequencing**  
ID=MI0014252\_1;accession\_number=MI0014252;Name=hsa-mir-3202-1  
Total reads = 0



**C) PPB Case 14 tumor miRNA sequencing**  
ID=MI0014252\_1;accession\_number=MI0014252;Name=hsa-mir-3202-1  
Total reads = 0



**D) PPB Case 14 cell line miRNA sequencing**  
ID=MI0014252\_1;accession\_number=MI0014252;Name=hsa-mir-3202-1  
Total reads = 0



**B) Normal fibroblast miRNA sequencing**  
ID=MI0014253\_1;accession\_number=MI0014253;Name=hsa-mir-3202-2  
Total reads = 0



**C) PPB Case 14 tumor miRNA sequencing**  
ID=MI0014253\_1;accession\_number=MI0014253;Name=hsa-mir-3202-2  
Total reads = 0



**D) PPB Case 14 cell line miRNA sequencing**  
ID=MI0014253\_1;accession\_number=MI0014253;Name=hsa-mir-3202-2  
Total reads = 0



**B) Normal fibroblast miRNA sequencing**  
ID=MI0012489\_1;accession\_number=MI0012489;Name=hsa-mir-718  
Total reads = 0



**C) PPB Case 14 tumor miRNA sequencing**  
ID=MI0012489\_1;accession\_number=MI0012489;Name=hsa-mir-718  
Total reads = 0



**D) PPB Case 14 cell line miRNA sequencing**  
ID=MI0012489\_1;accession\_number=MI0012489;Name=hsa-mir-718  
Total reads = 0



**B) Normal fibroblast miRNA sequencing**  
ID=MI0006277\_1;accession\_number=MI0006277;Name=hsa-mir-1184-1  
Total reads = 0



**C) PPB Case 14 tumor miRNA sequencing**  
ID=MI0006277\_1;accession\_number=MI0006277;Name=hsa-mir-1184-1  
Total reads = 0



**D) PPB Case 14 cell line miRNA sequencing**  
ID=MI0006277\_1;accession\_number=MI0006277;Name=hsa-mir-1184-1  
Total reads = 0



**B) Normal fibroblast miRNA sequencing**  
ID=MI0015971\_1;accession\_number=MI0015971;Name=hsa-mir-1184-2  
Total reads = 0



**C) PPB Case 14 tumor miRNA sequencing**  
ID=MI0015971\_1;accession\_number=MI0015971;Name=hsa-mir-1184-2  
Total reads = 0



**D) PPB Case 14 cell line miRNA sequencing**  
ID=MI0015971\_1;accession\_number=MI0015971;Name=hsa-mir-1184-2  
Total reads = 0





**B) Normal fibroblast miRNA sequencing**  
ID=MI0015972\_1;accession\_number=MI0015972;Name=hsa-mir-1184-3  
Total reads = 0



**C) PPB Case 14 tumor miRNA sequencing**  
ID=MI0015972\_1;accession\_number=MI0015972;Name=hsa-mir-1184-3  
Total reads = 0



**D) PPB Case 14 cell line miRNA sequencing**  
ID=MI0015972\_1;accession\_number=MI0015972;Name=hsa-mir-1184-3  
Total reads = 0



**B) Normal fibroblast miRNA sequencing**  
ID=MI0023561\_1;accession\_number=MI0023561;Name=hsa-mir-3690-2  
Total reads = 0



**C) PPB Case 14 tumor miRNA sequencing**  
ID=MI0023561\_1;accession\_number=MI0023561;Name=hsa-mir-3690-2  
Total reads = 0



**D) PPB Case 14 cell line miRNA sequencing**  
ID=MI0023561\_1;accession\_number=MI0023561;Name=hsa-mir-3690-2  
Total reads = 0



**B) Normal fibroblast miRNA sequencing**  
ID=MI0023563\_1;accession\_number=MI0023563;Name=hsa-mir-6089-2  
Total reads = 0



**C) PPB Case 14 tumor miRNA sequencing**  
ID=MI0023563\_1;accession\_number=MI0023563;Name=hsa-mir-6089-2  
Total reads = 0



**D) PPB Case 14 cell line miRNA sequencing**  
ID=MI0023563\_1;accession\_number=MI0023563;Name=hsa-mir-6089-2  
Total reads = 0



Supplement: onc2014150x6.pdf [file onc2014150x6.pdf]
