# Supplementary material
Source: PubMed Central journal article supplement (PMC4287649)
Supplement: onc2014150x1.pdf [file onc2014150x1.pdf]

## Supplementary Figure 1

DICER1 somatic hotspot mutation c.5125 G>A (p.D1709N) is in trans with germline mutant allele as shown by amplification with discriminating primers

Reference  
sequence

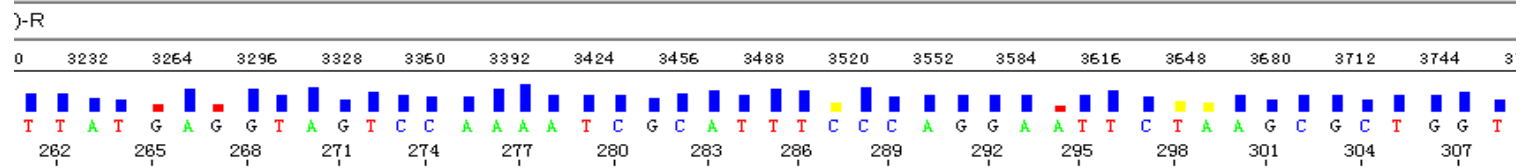

Blood DNA

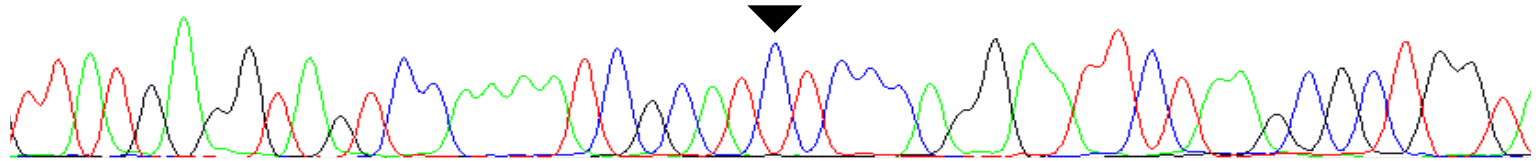

Tumor DNA

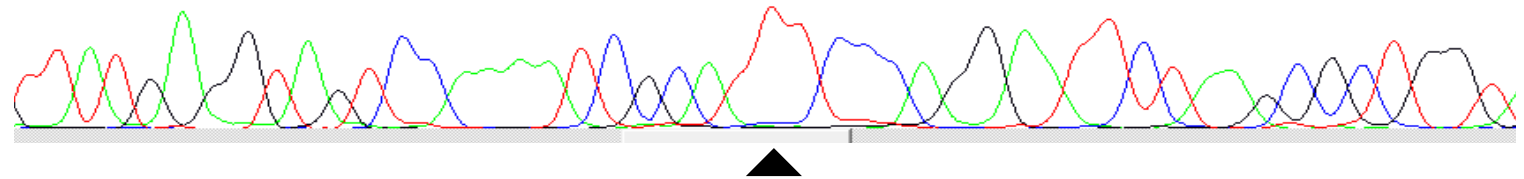

Position of germline  
loss-of-function variant

DNA sequence of DICER1 exon 23 from blood and tumor specimens using discriminating primers across germline mutant sequence (c.4407\_4410delTTCT). Tumor DNA shows c.5125G>A (p.D1709N) in wild-type allele (germline mutant-negative allele).
