# Supplementary material
Source: PubMed Central journal article supplement (PMC4287649)
Supplement: onc2014150x2.pdf [file onc2014150x2.pdf]

## Supplementary Figure 2

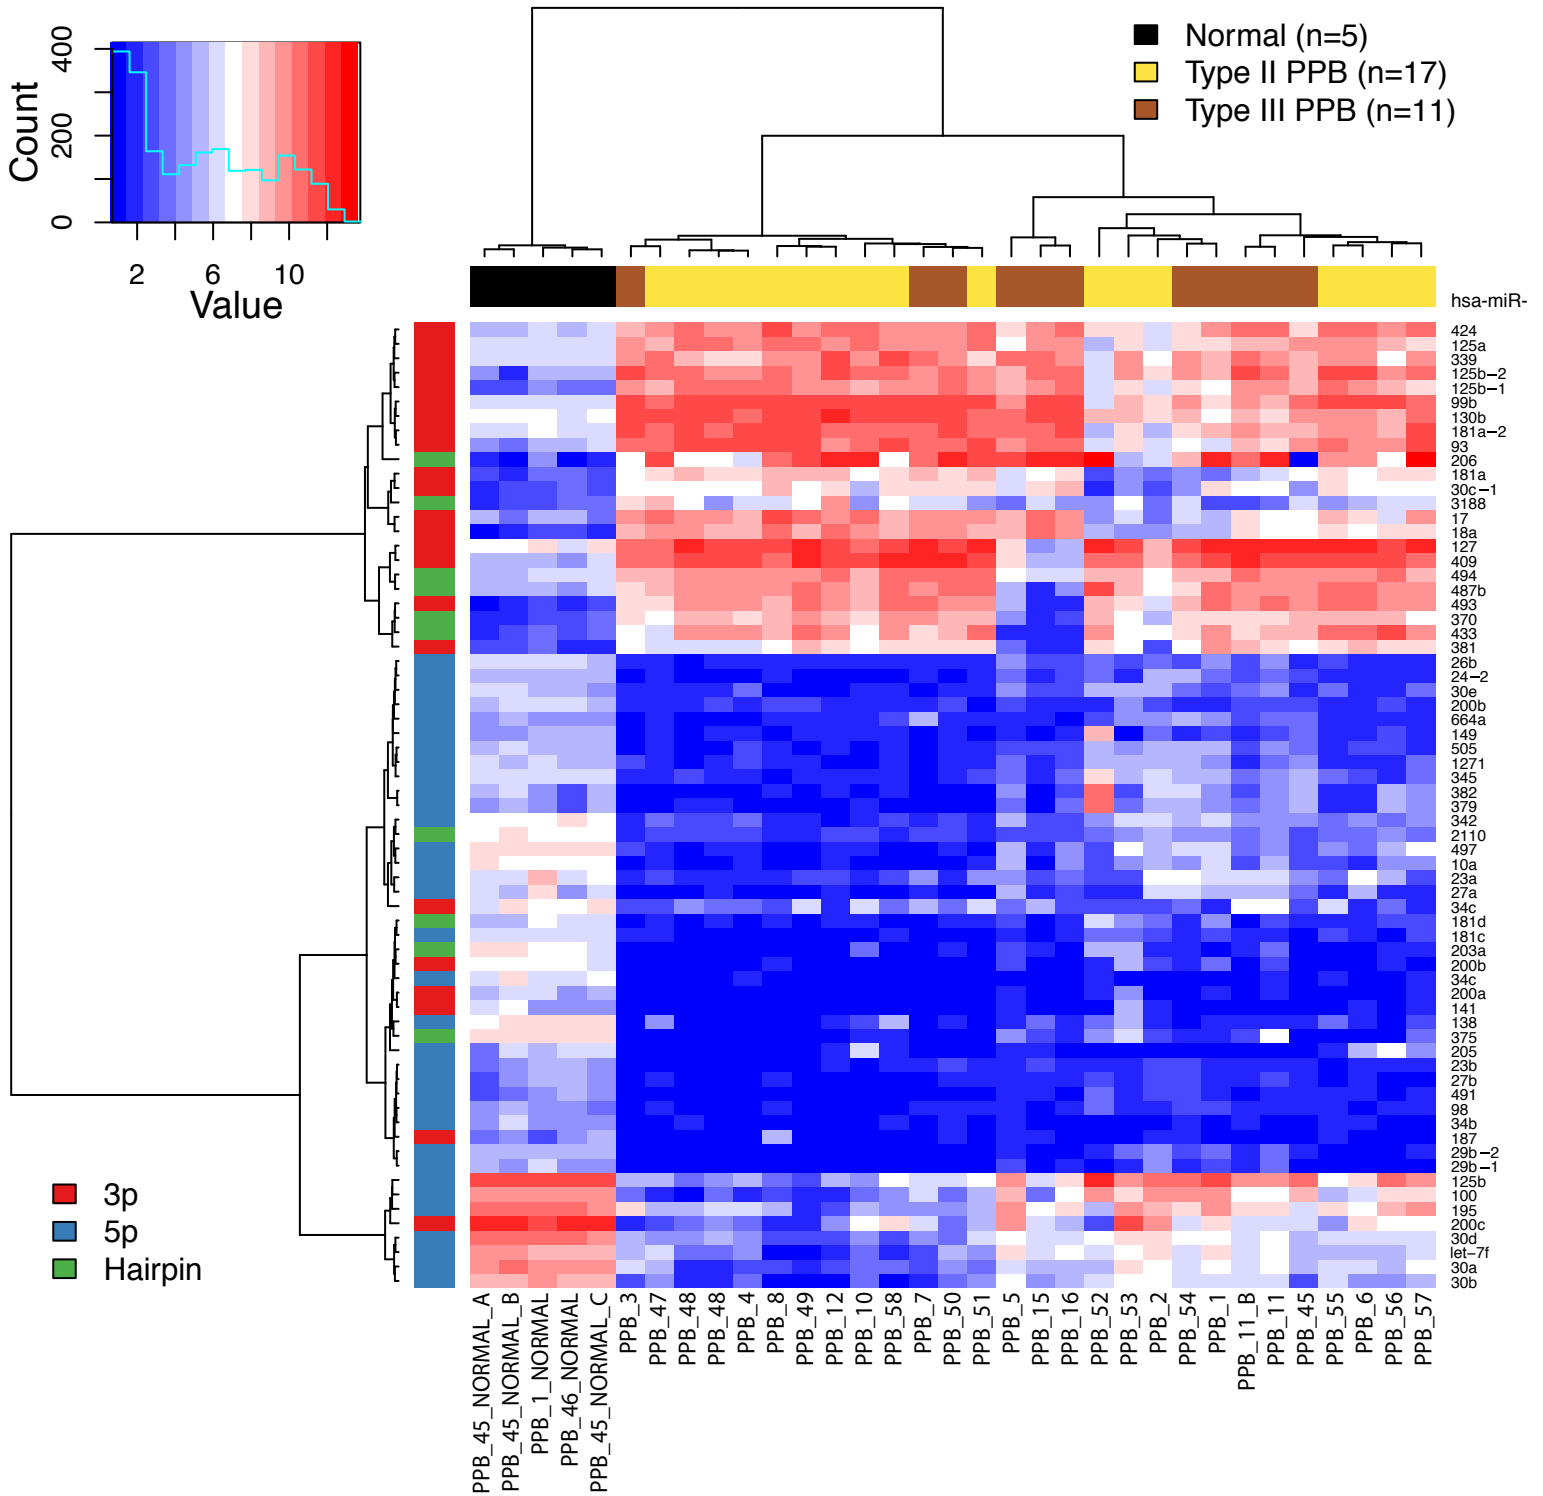

Expression levels of miRNAs with at least three-fold difference in median expression between PPB and normal lung tissues from DICER1 germline carriers. Hierarchical clustering suggests a depletion of 5'-derived miRNAs relative to 3'-derived miRNAs in PPB tumors with DICER somatic missense mutations in addition to germline loss-of-function variants.
