# Supplementary material
Source: PubMed Central journal article supplement (PMC4287649)
Supplement: onc2014150x3.pdf [file onc2014150x3.pdf]

Supplementary Figure 3

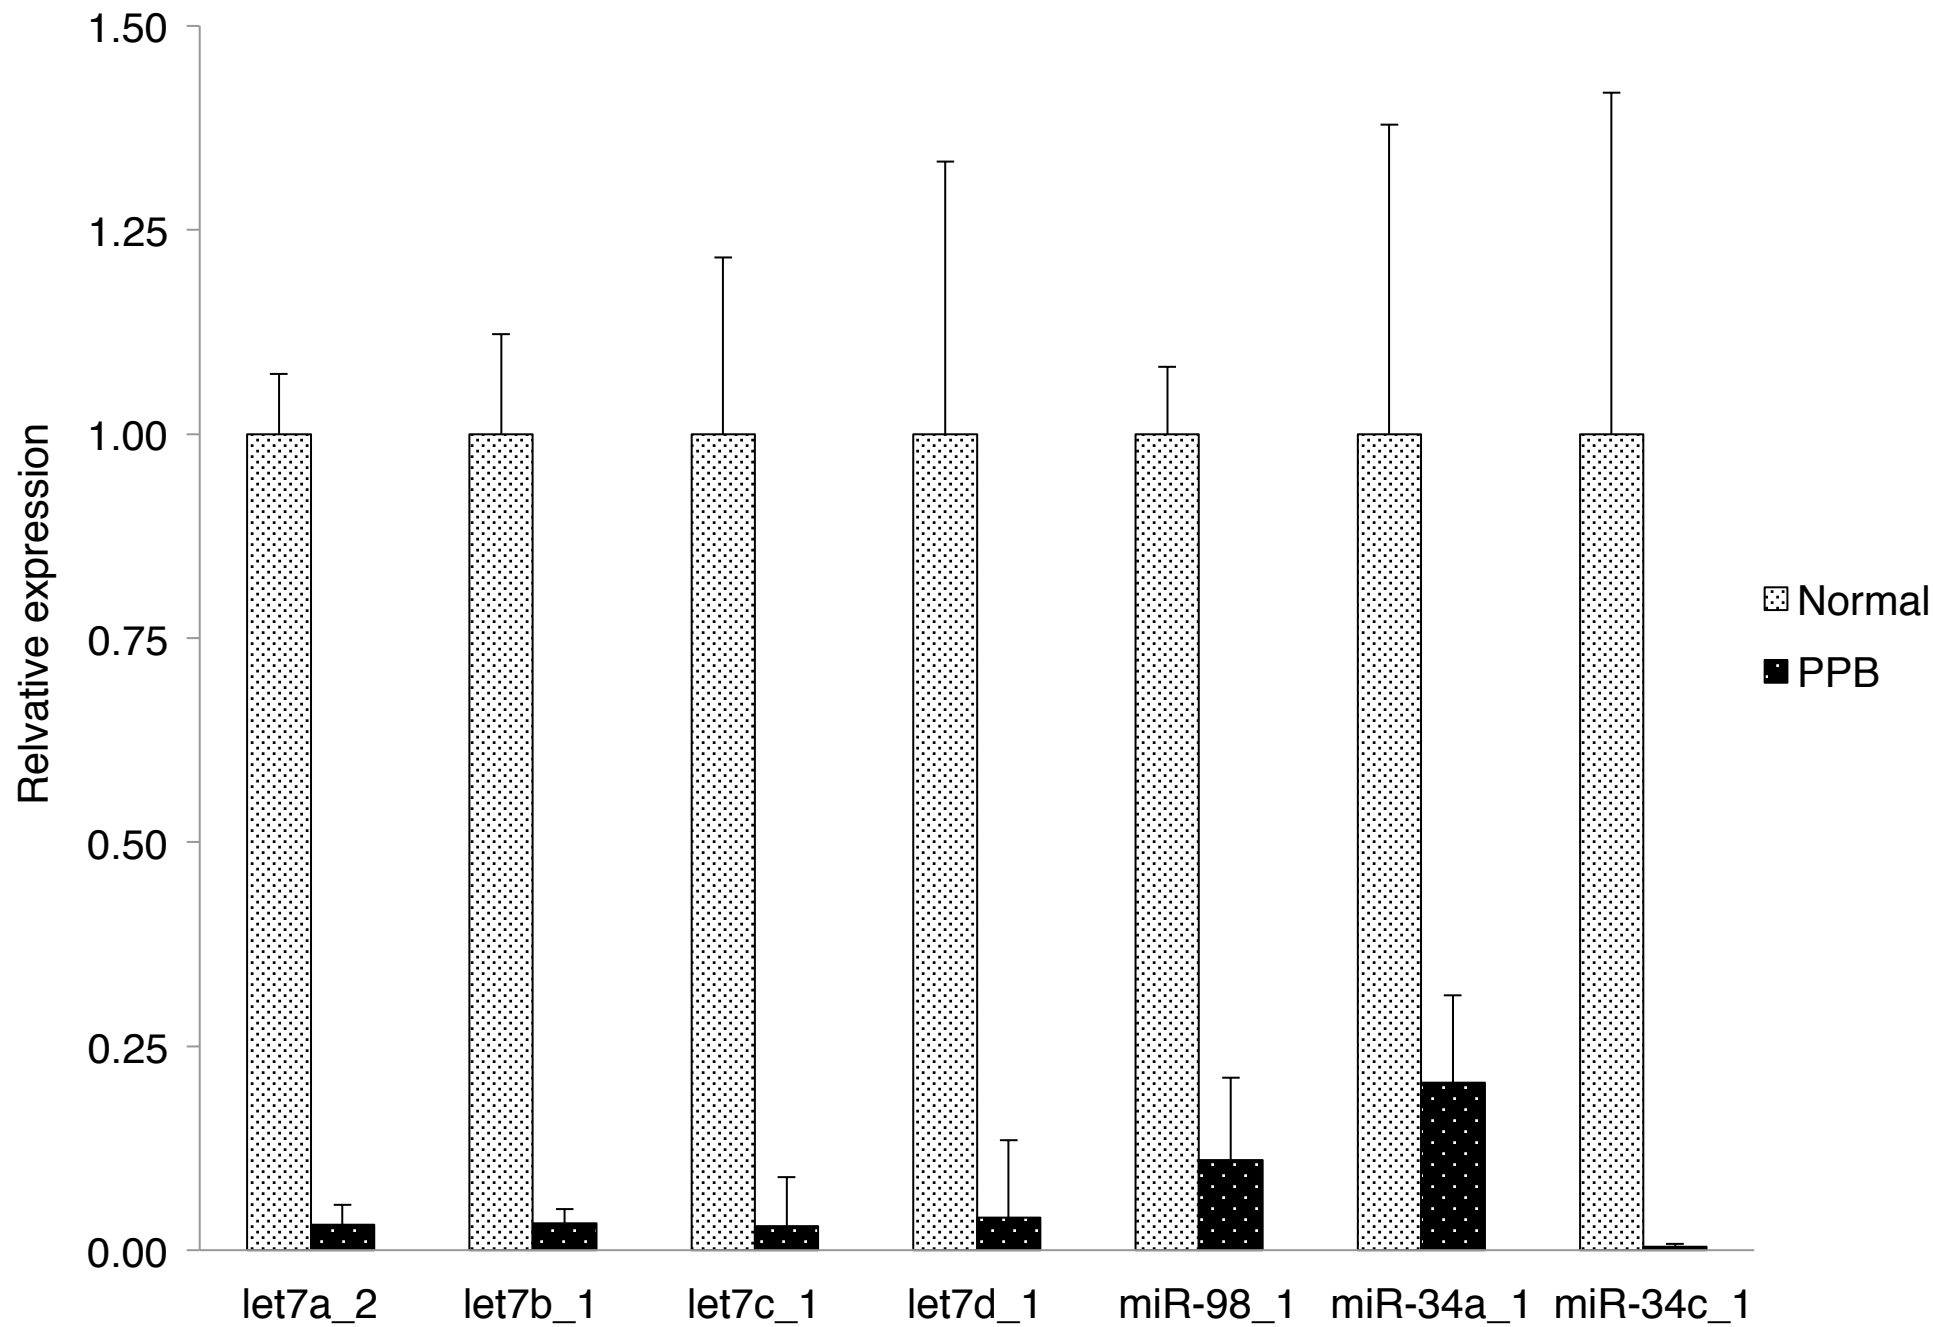

qRT-PCR from DICER1 mutant tumors demonstrating decreased expression of 5p-microRNA in PPB (type II and III) patient tissues. Five members of let-7 family including miR-98, plus miR-34a and c shown.
