# Supplementary material
Source: PubMed Central journal article supplement (PMC4287649)

Supplementary Figure 4

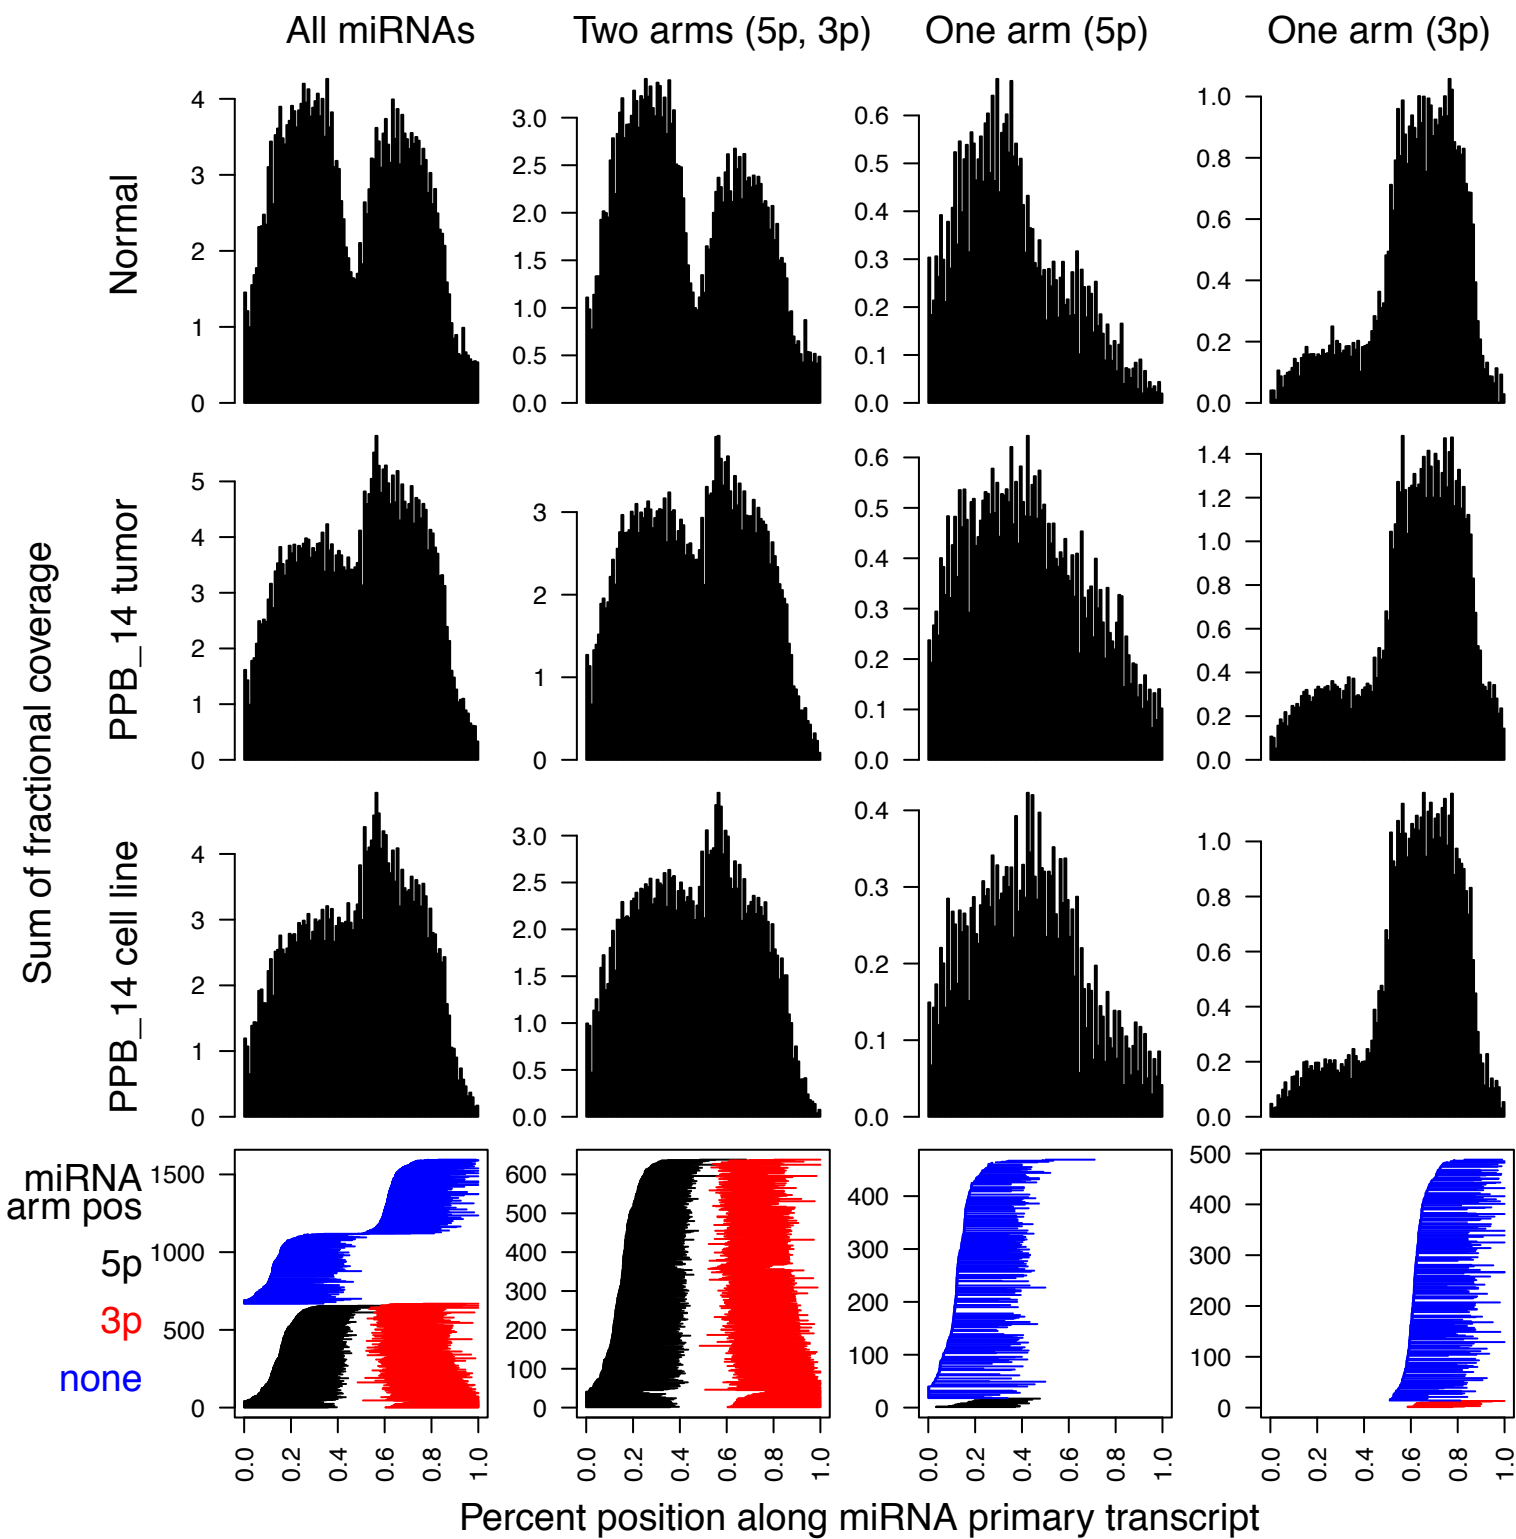

Supplement: onc2014150x4.pdf [file onc2014150x4.pdf]

Supplementary Figure 5

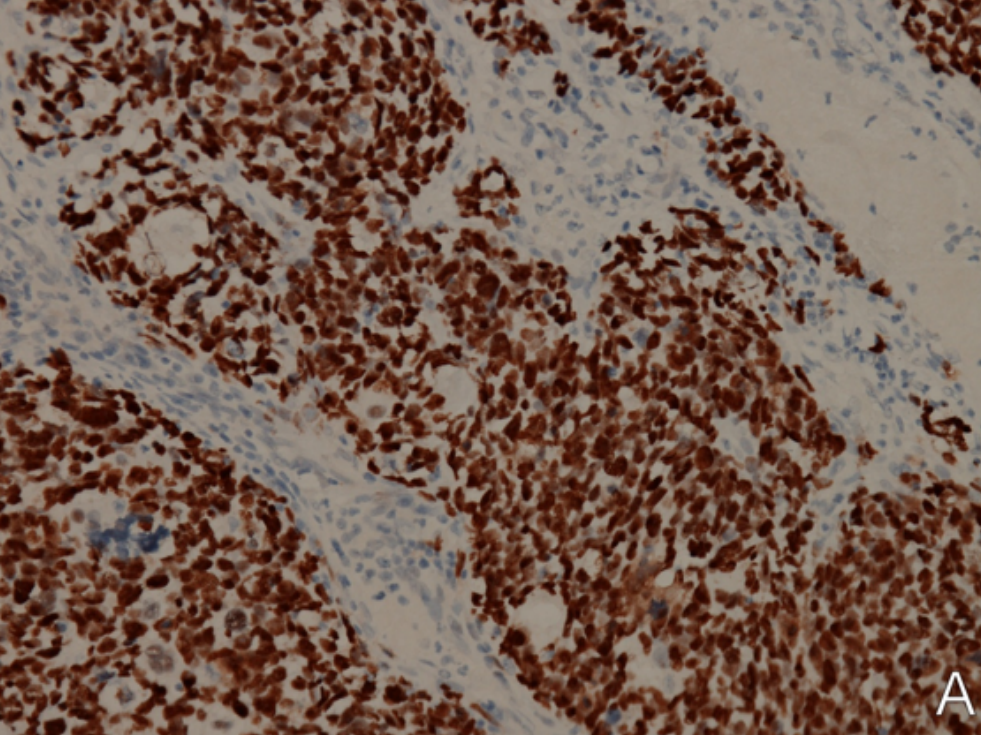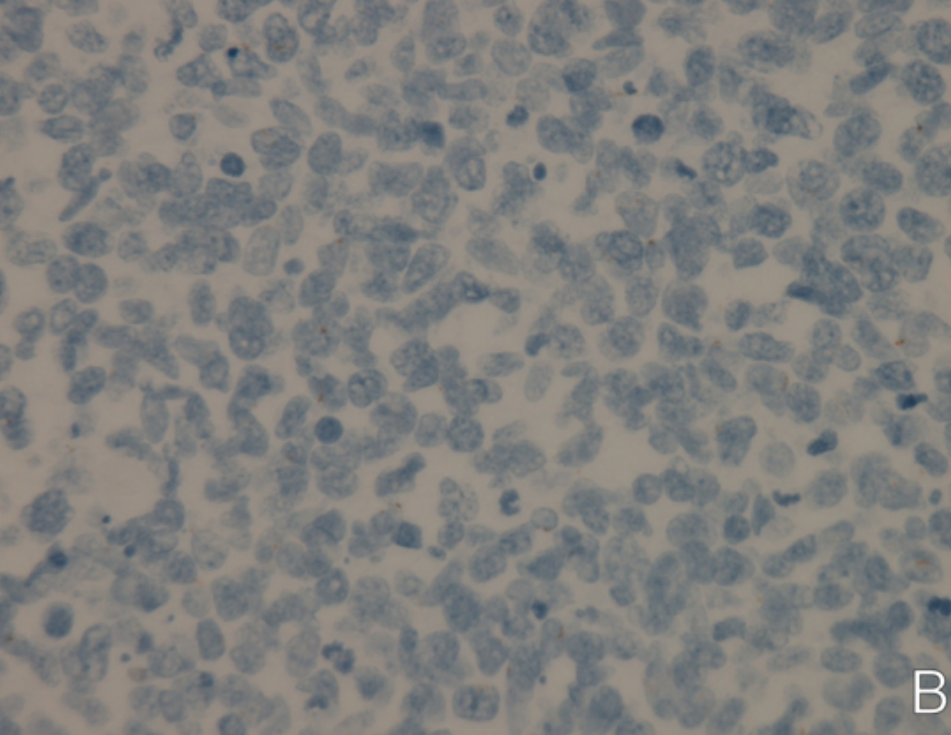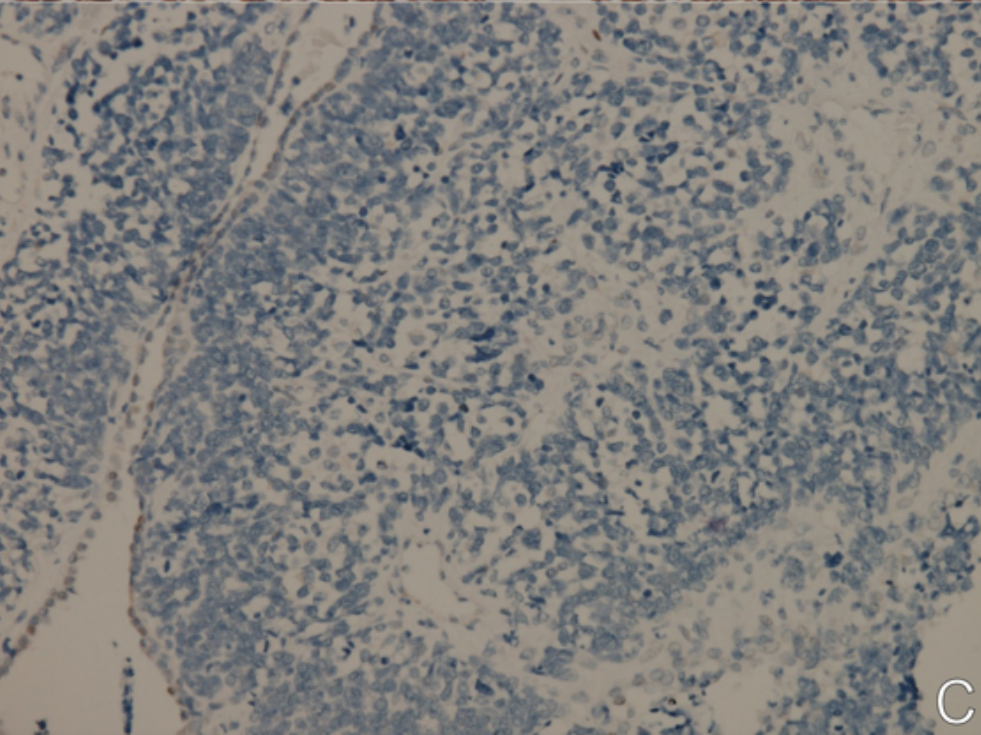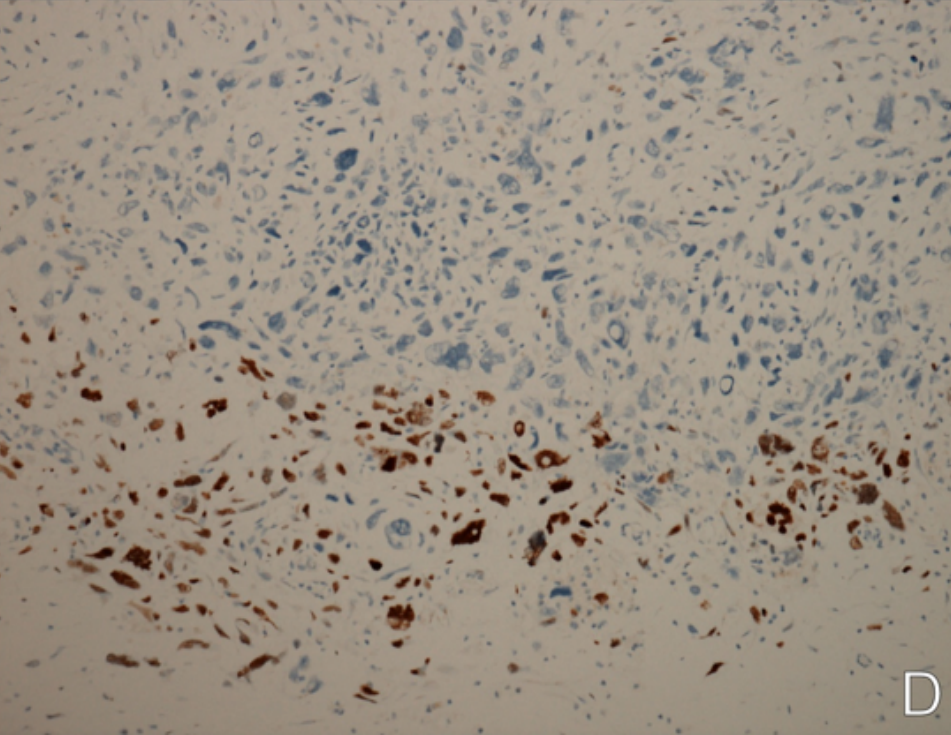

Supplement: onc2014150x5.pdf [file onc2014150x5.pdf]
